# Supplementary material for: Bayesian Inference of State-Level COVID-19 Basic Reproduction Numbers across the United States
Source: MDPI journal article supplement (doi:10.3390/v14010157), 2022-01-15

# **Supplementary Information: Bayesian Inference of State-Level COVID-19 Basic Reproduction Numbers across the United States**

Abhishek Mallela<sup>a</sup>, Jacob Neumann<sup>b,1</sup>, Ely F. Miller<sup>b</sup>, Ye Chen<sup>c</sup>, Richard G. Posner<sup>b</sup>, Yen Ting Lin<sup>d</sup>,  
and William S. Hlavacek<sup>e,2\*</sup>

<sup>a</sup>Department of Mathematics, University of California, Davis, CA 95616, USA

<sup>b</sup>Department of Biological Sciences, Northern Arizona University, Flagstaff, AZ 86011, USA

<sup>c</sup>Department of Mathematics and Statistics, Northern Arizona University, Flagstaff, AZ 86011, USA

<sup>d</sup>Computer, Computational and Statistical Sciences Division, Los Alamos National Laboratory, Los Alamos, NM 87545, USA

<sup>e</sup>Theoretical Division, Los Alamos National Laboratory, Los Alamos, NM 87545, USA

<sup>1</sup>Current address: Department of Chemistry and Chemical Biology, Cornell University, Ithaca, NY 14853, USA

<sup>2</sup>To whom correspondence may be addressed. Email: wish@lanl.gov

## Reduced Model

We derive  $\mathcal{R}_0$  from a simplified form of the compartmental model of Lin et al. [1]. The reduced model is obtained by omitting variables and terms for interventions, including social distancing, quarantine, and self-isolation. Thus, the reduced model describes disease transmission dynamics in the absence of interventions. The equations of the reduced model are as follows:

$$\frac{dS}{dt} = -\frac{\beta S}{S_0} [I + \rho_E(E_2 + E_3 + E_4 + E_5) + \rho_A A], \quad (1)$$

$$\frac{dE_1}{dt} = \frac{\beta S}{S_0} [I + \rho_E(E_2 + E_3 + E_4 + E_5) + \rho_A A] - k_L E_1, \quad (2)$$

$$\frac{dE_i}{dt} = k_L(E_{i-1} - E_i), \text{ for } i = 2, 3, \dots, m \quad (3)$$

$$\frac{dA}{dt} = f_A k_L E_m - c_A A, \quad (4)$$

$$\frac{dI}{dt} = (1 - f_A) k_L E_m - c_I I, \quad (5)$$

$$\frac{dH}{dt} = f_H c_I I - c_H H, \quad (6)$$

$$\frac{dR}{dt} = c_A A + (1 - f_H) c_I I + f_R c_H H, \quad (7)$$

$$\frac{dD}{dt} = (1 - f_R) c_H H, \quad (8)$$

where  $t$  denotes time,  $\beta$ ,  $S_0$ ,  $\rho_E$ ,  $\rho_A$ ,  $k_L$ ,  $f_A$ ,  $f_H$ ,  $f_R$ ,  $c_A$ ,  $c_I$ , and  $c_H$  are positive-valued time-invariant parameters, as defined in Lin et al. [1], and  $m$  denotes the number of stages taken to comprise the incubation period. Here and in the study of Lin et al. [1],  $m = 5$ . The values of  $\beta$  (a rate constant characterizing disease transmission) and  $S_0$  (the total population) are taken to be region-specific; the other parameters have values that are taken to be universal (i.e., applicable to all regions of interest). The variable  $S$  denotes the population of susceptible persons. The variables  $E_1$  to  $E_m$  denote populations of exposed persons, e.g., persons incubating virus but not symptomatic. As noted earlier, the incubation period is divided into  $m$  stages. The variable  $A$  denotes the population of persons who have progressed through the incubation period but will never develop symptoms (i.e., persons with asymptomatic



infections). The variable  $I$  denotes the population of persons with mild symptomatic disease. The variable  $H$  denotes the population of persons with severe disease who are hospitalized or isolated at home. The variable  $R$  denotes the population of recovered persons, and the variable  $D$  denotes the population of deceased persons.

### Basic Reproduction Number

The basic reproduction number,  $\mathcal{R}_0$ , is defined as the number of secondary infections caused by an infected person during the entire period of infectiousness when introduced into a population consisting of susceptible persons only and there are no interventions to limit disease transmission. Here, we use the next-generation matrix method to compute  $\mathcal{R}_0$  [2]. The model has a disease-free equilibrium (DFE)  $x_0$  with  $S = S_0$ , where  $S_0$  is the total population and the remaining populations  $(E_1, E_2, \dots, E_m, A, I, H, R, D)$  are equal to 0.

To use the next-generation matrix method, we let  $x = (E_1, E_2, E_3, E_4, E_5, A, I)$  denote the vector of state variables corresponding to compartments containing infected persons. For each infected compartment  $i$ , we define  $f_i$  as the rate of entry of newly infected persons into compartment  $i$  and  $v_i$  as the net transfer of persons out of the  $i^{th}$  compartment. Then, we have  $dx_i/dt = f_i(x) - v_i(x)$ . Now, we let  $F$  and  $V$  denote the Jacobians of  $f$  and  $v$  evaluated at the disease-free equilibrium  $x_0$ . The  $(i, j)$  entry of the matrix  $F$  is the rate at which infected persons in the  $j^{th}$  compartment produce a new infection in the  $i^{th}$  compartment. The  $(j, k)$  entry of the matrix  $V^{-1}$  is the expected amount of time that a person introduced to the  $k^{th}$  compartment will spend in a single visit to the  $j^{th}$  compartment. The matrix  $F$ , which is non-negative, is defined as follows:

$$F \equiv \begin{pmatrix} 0 & \rho_E \beta & \rho_E \beta & \rho_E \beta & \rho_E \beta & \rho_A \beta & \beta \\ 0 & 0 & 0 & 0 & 0 & 0 & 0 \\ 0 & 0 & 0 & 0 & 0 & 0 & 0 \\ 0 & 0 & 0 & 0 & 0 & 0 & 0 \\ 0 & 0 & 0 & 0 & 0 & 0 & 0 \\ 0 & 0 & 0 & 0 & 0 & 0 & 0 \\ 0 & 0 & 0 & 0 & 0 & 0 & 0 \end{pmatrix}$$

The matrix  $V$ , which is non-singular (i.e., invertible), is defined as follows:

$$V \equiv \begin{pmatrix} k_L & 0 & 0 & 0 & 0 & 0 & 0 \\ -k_L & k_L & 0 & 0 & 0 & 0 & 0 \\ 0 & -k_L & k_L & 0 & 0 & 0 & 0 \\ 0 & 0 & -k_L & k_L & 0 & 0 & 0 \\ 0 & 0 & 0 & -k_L & k_L & 0 & 0 \\ 0 & 0 & 0 & 0 & -f_A k_L & c_A & 0 \\ 0 & 0 & 0 & 0 & -(1-f_A)k_L & 0 & c_I \end{pmatrix}$$

We find  $\mathcal{R}_0$  as the spectral radius (i.e., the dominant eigenvalue) of the matrix  $FV^{-1}$  [2], which is given by Eq. 1 in the main text.

### Epidemic growth rate

The epidemic growth rate  $\lambda$  is defined as the dominant eigenvalue of the Jacobian of the reduced model linearized at the disease-free equilibrium (DFE). Thus,  $\lambda$  is the largest root of the characteristic polynomial for the 7-dimensional Jacobian matrix  $J$ , which is equivalent to  $F - V$ . We used the *CharacteristicPolynomial* function in Mathematica [3] to find  $J$ :

$$p_J(x) = \beta(1-f_A)k_L^5(c_A + x) + [\beta f_A k_L^5 \rho_A + (c_A + x)(-k_L^5 + 4\beta k_L^4 \rho_E - 5k_L^4 x + 6\beta k_L^3 \rho_E x - 10k_L^3 x^2 + 4\beta k_L^2 \rho_E x^2 - 10k_L^2 x^3 + \beta k_L \rho_E x^3 - 5k_L x^4 - x^5)](c_I + x) \quad (9)$$

The largest root was found numerically. Solutions were based on state-specific estimates for  $\beta$  and the estimates of Lin et al. [1] for other parameters in Eq. 9.

### Progress toward herd immunity

In this section, we explain the assumptions and derive the formula for our metric of progress toward herd immunity (Eq. 2 in the main text). First, we define the variables used in our analysis. For a

given region,  $S_0$  denotes the total population size,  $N_d$  denotes the cumulative number of cases detected,  $N_a$  denotes the cumulative number of asymptomatic cases,  $N_v$  denotes the cumulative number of vaccinations completed,  $N_{v,s}$  denotes the number of persons who were susceptible at the time of vaccination,  $N_{v,r}$  denotes the number of persons who had recovered from infection at the time of vaccination,  $N_c$  denotes the cumulative number of all cases,  $\varepsilon_v$  denotes the fraction of vaccinated individuals protected from productive infection (i.e., an infection that can be transmitted to others),  $\varepsilon_r$  denotes the fraction of recovered individuals protected from productive infection,  $N_r$  denotes the number of individuals who have recovered from infection, HIT denotes the herd immunity threshold for ancestral strains,  $Y_{\text{Delta}}$  denotes the infectiousness of SARS-CoV-2 variant Delta relative to ancestral strains,  $S_h \equiv \text{HIT} \times S_0$  denotes the threshold number of persons with immunity needed for herd immunity (in the face of ancestral strains),  $S_i$  denotes the estimated number of persons with immunity,  $f_A \equiv N_a/N_c$  denotes the fraction of all cases that are asymptomatic,  $f_r \equiv N_r/S_0$  denotes the fraction of the population with immunity acquired through infection, and  $f_v \equiv N_v/S_0$  denotes the fraction of the population that has been vaccinated.

We assume that  $S_0$  is constant. We take  $N_r = N_c$  to be a good approximation. We assume that we know  $S_0$ ,  $N_d$ , and  $N_v$ . We assume that susceptible and recovered individuals have the same probability of being vaccinated. From our assumption that susceptible and recovered individuals have the same probability of being vaccinated, it follows that  $N_{v,s} = (1 - f_r)N_v$  and  $N_{v,r} = f_r N_v$ . These relations are consistent with  $N_v \equiv N_{v,s} + N_{v,r}$ . The number of individuals with immunity (protection from productive infection) is given by

$$S_i = \varepsilon_v N_{v,s} + \varepsilon_r N_r = \varepsilon_v (1 - f_r) N_v + \varepsilon_r N_r \quad (10)$$

We assume that  $Y_{\text{Delta}}$  gives the value of  $\beta$  for SARS-CoV-2 variant Delta relative to  $\beta$  for ancestral strains. We assume all other model parameters are the same for Delta. Thus,  $Y_{\text{Delta}} \mathcal{R}_0$  is the basic

reproduction number in the face of Delta. We define  $\mathcal{P}$ , percent progress toward herd immunity, as

$$\mathcal{P} = \frac{S_i}{S_0} \left( 1 - \frac{1}{Y_{\text{Delta}} \mathcal{R}_0} \right)^{-1} \times 100\%$$

Using the expression given above for  $S_i$  (Eq. 10),  $1 - 1/(Y_{\text{Delta}} \mathcal{R}_0)$  as the Delta-adjusted HIT, and  $S_h = \text{HIT} \times S_0$ , we find Eq. 2 in the main text.

## References

1. Y. T. Lin *et al.*, Daily forecasting of regional epidemics of coronavirus disease with Bayesian uncertainty quantification. *Emerg Infect Dis.* **27**, 767-778 (2021).
2. O. Diekmann, J. A. Heesterbeek, M. G. Roberts, The construction of next-generation matrices for compartmental epidemic models. *J R Soc Interface.* **7**, 873-875 (2010).
3. Wolfram S., *Mathematica: A System for Doing Mathematics by Computer* (Addison Wesley Longman Publishing Co., Inc., Boston, MA, 1991).
4. E. D. Mitra *et al.*, PyBioNetFit and the biological property specification language. *iScience.* **19**, 1012-1036 (2019).

Table S1. Estimates of state-specific model parameters. MAP estimates and 95% credible intervals (within parentheses) are given for the inferred parameters.

| State          | S_0      | I_0 | m_b | \rho_H_E | \rho_H_A | k_L  | k_Q    | j_Q | f_A  | f_H   | f_R  | c_A  | c_I  | c_H  | t_0                   | tau_1-sigma           | beta               | lambda_0            | p_0                | lambda_1           | p_1                | f_D                | r                     |
|----------------|----------|-----|-----|----------|----------|------|--------|-----|------|-------|------|------|------|------|-----------------------|-----------------------|--------------------|---------------------|--------------------|--------------------|--------------------|--------------------|-----------------------|
| Alabama        | 4903185  | 1   | 0.1 | 1.1      | 0.9      | 0.94 | 0.0038 | 0.4 | 0.44 | 0.054 | 0.79 | 0.26 | 0.12 | 0.17 | 30.984(22.360-34.336) | N/A                   | 0.391(0.347-0.436) | 3.499(1.001-9.868)  | 0.413(0.369-0.452) | N/A                | N/A                | 0.967(0.239-1.000) | 7.552(5.428-9.683)    |
| Alaska         | 731545   | 1   | 0.1 | 1.1      | 0.9      | 0.94 | 0.0038 | 0.4 | 0.44 | 0.054 | 0.79 | 0.26 | 0.12 | 0.17 | 0.389(0.000-8.320)    | 24.592(20.416-31.857) | 0.209(0.208-0.226) | 8.181(1.843-9.917)  | 0.424(0.388-0.545) | 0.252(0.153-9.449) | 0.042(0.008-0.102) | 0.946(0.538-1.000) | 3.105(1.884-4.686)    |
| Arizona        | 7278717  | 1   | 0.1 | 1.1      | 0.9      | 0.94 | 0.0038 | 0.4 | 0.44 | 0.054 | 0.79 | 0.26 | 0.12 | 0.17 | 34.393(31.555-40.781) | 61.085(57.441-63.526) | 0.544(0.453-0.595) | 6.487(0.816-6.945)  | 0.518(0.469-0.552) | 5.772(0.660-9.581) | 0.422(0.375-0.476) | 0.136(0.039-0.931) | 10.369(7.094-12.786)  |
| Arkansas       | 3017804  | 1   | 0.1 | 1.1      | 0.9      | 0.94 | 0.0038 | 0.4 | 0.44 | 0.054 | 0.79 | 0.26 | 0.12 | 0.17 | 17.086(0.673-27.769)  | N/A                   | 0.283(0.241-0.350) | 7.148(1.130-9.832)  | 0.276(0.210-0.369) | N/A                | N/A                | 0.977(0.244-0.992) | 2.493(1.777-3.268)    |
| California     | 39512223 | 1   | 0.1 | 1.1      | 0.9      | 0.94 | 0.0038 | 0.4 | 0.44 | 0.054 | 0.79 | 0.26 | 0.12 | 0.17 | 18.929(12.922-20.468) | N/A                   | 0.387(0.363-0.410) | 0.091(0.079-0.106)  | 0.552(0.529-0.570) | N/A                | N/A                | 0.955(0.304-1.000) | 13.758(9.699-18.231)  |
| Colorado       | 5758736  | 1   | 0.1 | 1.1      | 0.9      | 0.94 | 0.0038 | 0.4 | 0.44 | 0.054 | 0.79 | 0.26 | 0.12 | 0.17 | 11.114(4.946-18.122)  | N/A                   | 0.373(0.331-0.417) | 0.164(0.093-0.261)  | 0.486(0.435-0.555) | N/A                | N/A                | 0.047(0.029-0.156) | 12.605(9.102-16.019)  |
| Connecticut    | 3565287  | 1   | 0.1 | 1.1      | 0.9      | 0.94 | 0.0038 | 0.4 | 0.44 | 0.054 | 0.79 | 0.26 | 0.12 | 0.17 | 24.579(19.192-34.957) | N/A                   | 0.458(0.366-0.529) | 0.163(0.067-0.256)  | 0.537(0.487-0.694) | N/A                | N/A                | 0.069(0.049-0.910) | 3.867(2.720-4.822)    |
| Delaware       | 973764   | 1   | 0.1 | 1.1      | 0.9      | 0.94 | 0.0038 | 0.4 | 0.44 | 0.054 | 0.79 | 0.26 | 0.12 | 0.17 | 15.707(1.352-25.519)  | N/A                   | 0.276(0.247-0.315) | 0.063(0.037-0.125)  | 0.513(0.377-0.569) | N/A                | N/A                | 0.539(0.052-0.935) | 3.984(2.789-5.207)    |
| Florida        | 21477737 | 1   | 0.1 | 1.1      | 0.9      | 0.94 | 0.0038 | 0.4 | 0.44 | 0.054 | 0.79 | 0.26 | 0.12 | 0.17 | 33.729(26.441-34.913) | 63.884(63.829-72.644) | 0.551(0.478-0.590) | 0.169(0.130-0.202)  | 0.674(0.637-0.685) | 0.044(0.003-8.701) | 0.548(0.380-0.505) | 0.889(0.158-0.999) | 10.547(7.282-13.066)  |
| Georgia        | 10617423 | 1   | 0.1 | 1.1      | 0.9      | 0.94 | 0.0038 | 0.4 | 0.44 | 0.054 | 0.79 | 0.26 | 0.12 | 0.17 | 30.334(24.584-33.012) | N/A                   | 0.448(0.398-0.500) | 0.176(0.134-0.235)  | 0.586(0.554-0.613) | N/A                | N/A                | 0.960(0.303-1.000) | 6.577(4.880-8.300)    |
| Hawaii         | 1415872  | 1   | 0.1 | 1.1      | 0.9      | 0.94 | 0.0038 | 0.4 | 0.44 | 0.054 | 0.79 | 0.26 | 0.12 | 0.17 | 0.250(0.005-18.577)   | 43.824(40.640-50.707) | 0.243(0.227-0.275) | 8.435(1.200-9.819)  | 0.462(0.429-0.531) | 0.368(0.208-9.438) | 0.065(0.000-0.133) | 0.269(0.148-0.989) | 7.416(3.538-12.138)   |
| Idaho          | 1787065  | 1   | 0.1 | 1.1      | 0.9      | 0.94 | 0.0038 | 0.4 | 0.44 | 0.054 | 0.79 | 0.26 | 0.12 | 0.17 | 30.384(22.035-41.502) | 26.118(16.787-44.416) | 0.402(0.321-0.491) | 1.650(0.579-9.408)  | 0.556(0.451-0.647) | 0.128(0.002-8.144) | 0.524(0.327-0.561) | 0.206(0.063-0.967) | 3.660(2.494-4.612)    |
| Illinois       | 12671821 | 1   | 0.1 | 1.1      | 0.9      | 0.94 | 0.0038 | 0.4 | 0.44 | 0.054 | 0.79 | 0.26 | 0.12 | 0.17 | 23.804(20.353-27.454) | N/A                   | 0.511(0.462-0.574) | 0.271(0.186-0.404)  | 0.506(0.476-0.539) | N/A                | N/A                | 0.047(0.043-0.051) | 16.940(11.817-20.504) |
| Indiana        | 6733219  | 1   | 0.1 | 1.1      | 0.9      | 0.94 | 0.0038 | 0.4 | 0.44 | 0.054 | 0.79 | 0.26 | 0.12 | 0.17 | 30.947(28.069-34.415) | N/A                   | 0.534(0.482-0.599) | 0.273(0.185-0.383)  | 0.582(0.553-0.620) | N/A                | N/A                | 0.061(0.043-0.097) | 23.028(16.373-27.360) |
| Iowa           | 3155070  | 1   | 0.1 | 1.1      | 0.9      | 0.94 | 0.0038 | 0.4 | 0.44 | 0.054 | 0.79 | 0.26 | 0.12 | 0.17 | 20.864(4.957-26.906)  | N/A                   | 0.284(0.265-0.311) | 0.051(0.031-0.077)  | 0.513(0.400-0.559) | N/A                | N/A                | 0.914(0.070-0.976) | 6.652(4.727-8.375)    |
| Kansas         | 2913314  | 1   | 0.1 | 1.1      | 0.9      | 0.94 | 0.0038 | 0.4 | 0.44 | 0.054 | 0.79 | 0.26 | 0.12 | 0.17 | 9.116(0.040-21.513)   | N/A                   | 0.327(0.294-0.393) | 8.963(0.715-9.752)  | 0.288(0.236-0.394) | N/A                | N/A                | 0.020(0.016-0.031) | 2.446(1.811-3.124)    |
| Kentucky       | 4467673  | 1   | 0.1 | 1.1      | 0.9      | 0.94 | 0.0038 | 0.4 | 0.44 | 0.054 | 0.79 | 0.26 | 0.12 | 0.17 | 14.497(23.657-31.344) | N/A                   | 0.330(0.336-0.371) | 0.247(1.525-6.814)  | 0.426(0.430-0.476) | N/A                | N/A                | 0.065(0.409-0.809) | 2.832(2.534-2.852)    |
| Louisiana      | 4648794  | 1   | 0.1 | 1.1      | 0.9      | 0.94 | 0.0038 | 0.4 | 0.44 | 0.054 | 0.79 | 0.26 | 0.12 | 0.17 | 29.321(23.099-34.600) | 23.063(22.072-41.478) | 0.487(0.396-0.561) | 0.068(0.050-0.143)  | 0.991(0.724-0.999) | 0.044(0.009-9.149) | 0.621(0.428-0.647) | 0.449(0.166-0.996) | 3.851(2.476-4.454)    |
| Maine          | 1344212  | 1   | 0.1 | 1.1      | 0.9      | 0.94 | 0.0038 | 0.4 | 0.44 | 0.054 | 0.79 | 0.26 | 0.12 | 0.17 | 0.056(0.001-7.602)    | N/A                   | 0.226(0.225-0.244) | 9.273(2.139-9.983)  | 0.232(0.226-0.271) | N/A                | N/A                | 0.982(0.519-1.000) | 6.302(4.256-8.785)    |
| Maryland       | 6045680  | 1   | 0.1 | 1.1      | 0.9      | 0.94 | 0.0038 | 0.4 | 0.44 | 0.054 | 0.79 | 0.26 | 0.12 | 0.17 | 20.912(16.191-25.682) | N/A                   | 0.409(0.369-0.455) | 0.180(0.110-0.286)  | 0.464(0.420-0.502) | N/A                | N/A                | 0.057(0.047-0.071) | 13.997(10.360-18.506) |
| Massachusetts  | 6892503  | 1   | 0.1 | 1.1      | 0.9      | 0.94 | 0.0038 | 0.4 | 0.44 | 0.054 | 0.79 | 0.26 | 0.12 | 0.17 | 22.670(11.016-25.519) | N/A                   | 0.380(0.348-0.420) | 0.055(0.042-0.096)  | 0.680(0.481-0.706) | N/A                | N/A                | 0.946(0.059-0.914) | 4.847(3.404-5.928)    |
| Michigan       | 9986857  | 1   | 0.1 | 1.1      | 0.9      | 0.94 | 0.0038 | 0.4 | 0.44 | 0.054 | 0.79 | 0.26 | 0.12 | 0.17 | 36.349(29.724-39.519) | N/A                   | 0.599(0.506-0.754) | 0.219(0.154-0.357)  | 0.685(0.641-0.721) | N/A                | N/A                | 0.952(0.105-0.968) | 2.915(2.098-3.639)    |
| Minnesota      | 5639632  | 1   | 0.1 | 1.1      | 0.9      | 0.94 | 0.0038 | 0.4 | 0.44 | 0.054 | 0.79 | 0.26 | 0.12 | 0.17 | 0.105(0.000-3.412)    | N/A                   | 0.300(0.298-0.311) | 9.571(2.160-10.000) | 0.212(0.204-0.238) | N/A                | N/A                | 0.023(0.021-0.026) | 8.521(6.229-10.348)   |
| Mississippi    | 2976149  | 1   | 0.1 | 1.1      | 0.9      | 0.94 | 0.0038 | 0.4 | 0.44 | 0.054 | 0.79 | 0.26 | 0.12 | 0.17 | 27.049(17.259-40.172) | N/A                   | 0.475(0.350-0.645) | 9.133(0.804-9.688)  | 0.450(0.367-0.583) | N/A                | N/A                | 0.048(0.033-0.269) | 2.518(1.782-3.260)    |
| Missouri       | 6137428  | 1   | 0.1 | 1.1      | 0.9      | 0.94 | 0.0038 | 0.4 | 0.44 | 0.054 | 0.79 | 0.26 | 0.12 | 0.17 | 37.235(30.639-41.290) | N/A                   | 0.475(0.406-0.581) | 0.937(0.298-7.115)  | 0.523(0.479-0.566) | N/A                | N/A                | 0.985(0.228-0.996) | 8.290(5.755-10.350)   |
| Montana        | 1068778  | 1   | 0.1 | 1.1      | 0.9      | 0.94 | 0.0038 | 0.4 | 0.44 | 0.054 | 0.79 | 0.26 | 0.12 | 0.17 | 0.754(0.002-16.742)   | 32.524(27.801-36.190) | 0.220(0.220-0.262) | 9.528(1.637-9.996)  | 0.495(0.476-0.612) | 5.366(0.234-9.455) | 0.056(0.033-0.157) | 0.971(0.257-1.000) | 4.025(1.952-5.840)    |
| Nebraska       | 1934408  | 1   | 0.1 | 1.1      | 0.9      | 0.94 | 0.0038 | 0.4 | 0.44 | 0.054 | 0.79 | 0.26 | 0.12 | 0.17 | 0.036(0.000-14.804)   | N/A                   | 0.246(0.236-0.256) | 0.020(0.011-0.032)  | 0.628(0.464-0.938) | N/A                | N/A                | 0.180(0.088-0.917) | 6.131(4.385-7.965)    |
| Nevada         | 3080156  | 1   | 0.1 | 1.1      | 0.9      | 0.94 | 0.0038 | 0.4 | 0.44 | 0.054 | 0.79 | 0.26 | 0.12 | 0.17 | 26.225(17.540-32.919) | 65.190(58.061-72.778) | 0.356(0.331-0.437) | 0.508(0.237-9.075)  | 0.452(0.408-0.493) | 6.065(0.219-9.464) | 0.320(0.267-0.418) | 0.802(0.093-0.981) | 8.104(5.467-10.151)   |
| New Hampshire  | 1359711  | 1   | 0.1 | 1.1      | 0.9      | 0.94 | 0.0038 | 0.4 | 0.44 | 0.054 | 0.79 | 0.26 | 0.12 | 0.17 | 0.002(0.000-3.737)    | N/A                   | 0.287(0.284-0.298) | 9.176(1.949-9.968)  | 0.267(0.255-0.294) | N/A                | N/A                | 0.026(0.021-0.033) | 10.142(6.935-12.710)  |
| New Jersey     | 8882190  | 1   | 0.1 | 1.1      | 0.9      | 0.94 | 0.0038 | 0.4 | 0.44 | 0.054 | 0.79 | 0.26 | 0.12 | 0.17 | 32.076(30.841-36.593) | N/A                   | 0.652(0.592-0.706) | 0.143(0.113-0.165)  | 0.710(0.686-0.768) | N/A                | N/A                | 0.173(0.102-0.917) | 16.197(11.032-20.226) |
| New Mexico     | 2096829  | 1   | 0.1 | 1.1      | 0.9      | 0.94 | 0.0038 | 0.4 | 0.44 | 0.054 | 0.79 | 0.26 | 0.12 | 0.17 | 2.728(0.179-20.746)   | N/A                   | 0.280(0.248-0.302) | 0.173(0.057-0.273)  | 0.342(0.325-0.451) | N/A                | N/A                | 0.052(0.032-0.910) | 10.695(7.485-13.903)  |
| New York       | 19453561 | 1   | 0.1 | 1.1      | 0.9      | 0.94 | 0.0038 | 0.4 | 0.44 | 0.054 | 0.79 | 0.26 | 0.12 | 0.17 | 26.493(22.339-28.209) | 6.945(5.447-8.628)    | 0.537(0.503-0.580) | 3.341(0.002-9.310)  | 0.000(0.000-0.047) | 0.173(0.141-0.236) | 0.693(0.649-0.718) | 0.842(0.266-1.000) | 15.497(10.271-17.131) |
| North Carolina | 10488084 | 1   | 0.1 | 1.1      | 0.9      | 0.94 | 0.0038 | 0.4 | 0.44 | 0.054 | 0.79 | 0.26 | 0.12 | 0.17 | 31.206(25.599-36.723) | N/A                   | 0.408(0.381-0.512) | 0.430(0.239-4.668)  | 0.460(0.417-0.498) | N/A                | N/A                | 0.916(0.178-0.996) | 9.592(6.512-11.786)   |
| North Dakota   | 762062   | 1   | 0.1 | 1.1      | 0.9      | 0.94 | 0.0038 | 0.4 | 0.44 | 0.054 | 0.79 | 0.26 | 0.12 | 0.17 | 0.121(0.000-6.987)    | N/A                   | 0.211(0.211-0.225) | 0.044(0.025-0.089)  | 0.389(0.316-0.484) | N/A                | N/A                | 0.987(0.504-1.000) | 6.428(4.278-8.309)    |
| Ohio           | 11689100 | 1   | 0.1 | 1.1      | 0.9      | 0.94 | 0.0038 | 0.4 | 0.44 | 0.054 | 0.79 | 0.26 | 0.12 | 0.17 | 24.363(15.560-29.743) | N/A                   | 0.374(0.340-0.412) | 0.114(0.091-0.147)  | 0.558(0.520-0.586) | N/A                | N/A                | 0.521(0.110-0.990) | 13.676(9.929-17.656)  |
| Oklahoma       | 3956971  | 1   | 0.1 | 1.1      | 0.9      | 0.94 | 0.0038 | 0.4 | 0.44 | 0.054 | 0.79 | 0.26 | 0.12 | 0.17 | 31.752(22.607-36.912) | 69.291(66.405-72.574) | 0.368(0.329-0.437) | 0.655(0.398-5.037)  | 0.455(0.420-0.680) | 0.675(0.197-9.220) | 0.230(0.016-0.302) | 0.854(0.148-0.992) | 7.919(5.391-10.034)   |
| Oregon         | 4217737  | 1   | 0.1 | 1.1      | 0.9      | 0.94 | 0.0038 | 0.4 | 0.44 | 0.054 | 0.79 | 0.26 | 0.12 | 0.17 | 16.689(8.407-26.374)  | 62.379(58.500-66.910) | 0.312(0.283-0.342) | 0.680(0.342-9.302)  | 0.400(0.343-0.416) | 1.426(0.348-9.533) | 0.239(0.179-0.295) | 0.302(0.114-0.997) | 10.100(6.422-13.594)  |
| Pennsylvania   | 12801989 | 1   | 0.1 | 1.1      | 0.9      | 0.94 | 0.0038 | 0.4 | 0.44 | 0.054 | 0.79 | 0.26 | 0.12 | 0.17 | 33.882(28.338-35.164) | N/A                   | 0.499(0.470-0.529) | 0.119(0.108-0.135)  | 0.682(0.657-0.694) | N/A                | N/A                | 0.897(0.148-0.980) | 24.128(17.365-30.657) |
| Rhode Island   | 1059361  | 1   | 0.1 | 1.1      | 0.9      | 0.94 | 0.0038 | 0.4 | 0.44 | 0.054 | 0.79 | 0.26 | 0.12 | 0.17 | 22.434(5.055-30.168)  | N/A                   | 0.307(0.268-0.356) | 0.059(0.024-0.187)  | 0.595(0.300-0.672) | N/A                | N/A                | 0.616(0.050-0.925) | 1.722(1.190-2.274)    |
| South Carolina | 5148714  | 1   | 0.1 | 1.1      | 0.9      | 0.94 | 0.0038 | 0.4 | 0.44 | 0.054 | 0.79 | 0.26 | 0.12 | 0.17 | 27.886(20.463-34.331) | 53.614(50.857-61.892) | 0.377(0.345-0.447) | 0.301(0.182-1.122)  |                    |                    |                    |                    |                       |

**Table S2.** State-specific MAP estimates and 95% credible intervals (within parentheses) of the initial epidemic growth rate  $\lambda$  (/d), basic reproduction number  $\mathcal{R}_0$ , herd immunity threshold (HIT), and Delta-adjusted HIT for SARS-CoV-2 ancestral strains. Estimates are based on state-specific daily reports of new COVID-19 cases from January 21, 2020 to June 21, 2020 (inclusive dates).

| State          | $\lambda$ (/d)     | $\mathcal{R}_0$    | HIT                | Delta-adjusted HIT* |
|----------------|--------------------|--------------------|--------------------|---------------------|
| Alabama        | 0.278(0.245-0.310) | 4.250(3.770-4.735) | 0.765(0.735-0.789) | 0.904(0.892-0.914)  |
| Alaska         | 0.127(0.126-0.142) | 2.275(2.257-2.452) | 0.560(0.557-0.592) | 0.821(0.820-0.834)  |
| Arizona        | 0.382(0.322-0.414) | 5.910(4.921-6.463) | 0.831(0.797-0.845) | 0.931(0.917-0.937)  |
| Arkansas       | 0.193(0.157-0.247) | 3.078(2.622-3.800) | 0.675(0.619-0.737) | 0.868(0.845-0.893)  |
| California     | 0.275(0.257-0.292) | 4.204(3.948-4.456) | 0.762(0.747-0.776) | 0.903(0.897-0.909)  |
| Colorado       | 0.264(0.232-0.297) | 4.049(3.601-4.536) | 0.753(0.722-0.780) | 0.900(0.887-0.910)  |
| Connecticut    | 0.325(0.260-0.373) | 4.977(3.982-5.752) | 0.799(0.749-0.826) | 0.918(0.898-0.929)  |
| Delaware       | 0.187(0.162-0.220) | 2.996(2.687-3.425) | 0.666(0.628-0.708) | 0.864(0.849-0.881)  |
| Florida        | 0.387(0.339-0.411) | 5.994(5.195-6.413) | 0.833(0.808-0.844) | 0.932(0.922-0.937)  |
| Georgia        | 0.319(0.283-0.354) | 4.872(4.324-5.438) | 0.795(0.769-0.816) | 0.917(0.906-0.925)  |
| Hawaii         | 0.158(0.144-0.186) | 2.638(2.471-2.988) | 0.621(0.595-0.665) | 0.846(0.835-0.864)  |
| Idaho          | 0.286(0.224-0.348) | 4.374(3.488-5.338) | 0.771(0.713-0.813) | 0.907(0.883-0.924)  |
| Illinois       | 0.361(0.328-0.401) | 5.557(5.017-6.242) | 0.820(0.801-0.840) | 0.927(0.919-0.935)  |
| Indiana        | 0.376(0.342-0.416) | 5.808(5.241-6.512) | 0.828(0.809-0.846) | 0.930(0.922-0.938)  |
| Iowa           | 0.194(0.178-0.216) | 3.088(2.884-3.376) | 0.676(0.653-0.704) | 0.868(0.859-0.880)  |
| Kansas         | 0.229(0.203-0.279) | 3.557(3.201-4.269) | 0.719(0.688-0.766) | 0.886(0.873-0.905)  |
| Kentucky       | 0.232(0.236-0.263) | 3.588(3.648-4.031) | 0.721(0.726-0.752) | 0.887(0.889-0.899)  |
| Louisiana      | 0.345(0.282-0.393) | 5.294(4.303-6.093) | 0.811(0.768-0.836) | 0.923(0.906-0.933)  |
| Maine          | 0.143(0.142-0.159) | 2.454(2.450-2.653) | 0.593(0.592-0.623) | 0.834(0.834-0.847)  |
| Maryland       | 0.291(0.261-0.324) | 4.446(4.006-4.951) | 0.775(0.750-0.798) | 0.909(0.899-0.918)  |
| Massachusetts  | 0.270(0.246-0.299) | 4.127(3.783-4.567) | 0.758(0.736-0.781) | 0.901(0.893-0.911)  |
| Michigan       | 0.416(0.358-0.505) | 6.510(5.498-8.194) | 0.846(0.818-0.878) | 0.938(0.926-0.950)  |
| Minnesota      | 0.207(0.205-0.217) | 3.261(3.237-3.386) | 0.693(0.691-0.705) | 0.875(0.874-0.880)  |
| Mississippi    | 0.337(0.247-0.444) | 5.167(3.804-7.012) | 0.806(0.737-0.857) | 0.921(0.893-0.942)  |
| Missouri       | 0.337(0.289-0.405) | 5.169(4.411-6.316) | 0.807(0.773-0.842) | 0.921(0.908-0.936)  |
| Montana        | 0.137(0.137-0.175) | 2.390(2.392-2.852) | 0.582(0.582-0.649) | 0.830(0.830-0.857)  |
| Nebraska       | 0.161(0.152-0.170) | 2.671(2.565-2.788) | 0.626(0.610-0.641) | 0.848(0.841-0.854)  |
| Nevada         | 0.252(0.232-0.311) | 3.870(3.595-4.750) | 0.742(0.722-0.789) | 0.895(0.887-0.914)  |
| New Hampshire  | 0.196(0.194-0.206) | 3.117(3.092-3.238) | 0.679(0.677-0.691) | 0.870(0.869-0.874)  |
| New Jersey     | 0.448(0.412-0.479) | 7.093(6.440-7.673) | 0.859(0.845-0.870) | 0.943(0.937-0.947)  |
| New Mexico     | 0.190(0.162-0.209) | 3.042(2.692-3.280) | 0.671(0.629-0.695) | 0.866(0.849-0.876)  |
| New York       | 0.378(0.356-0.405) | 5.842(5.469-6.310) | 0.829(0.817-0.842) | 0.930(0.926-0.936)  |
| North Carolina | 0.290(0.270-0.362) | 4.433(4.141-5.567) | 0.774(0.758-0.820) | 0.908(0.902-0.927)  |
| North Dakota   | 0.129(0.128-0.142) | 2.296(2.289-2.443) | 0.564(0.563-0.591) | 0.823(0.822-0.834)  |
| Ohio           | 0.265(0.239-0.293) | 4.063(3.698-4.475) | 0.754(0.730-0.777) | 0.900(0.890-0.909)  |
| Oklahoma       | 0.261(0.231-0.311) | 3.998(3.579-4.748) | 0.750(0.721-0.789) | 0.898(0.886-0.914)  |

|                |                    |                    |                    |                    |
|----------------|--------------------|--------------------|--------------------|--------------------|
| Oregon         | 0.217(0.193-0.241) | 3.389(3.078-3.721) | 0.705(0.675-0.731) | 0.880(0.868-0.891) |
| Pennsylvania   | 0.353(0.334-0.373) | 5.423(5.108-5.753) | 0.816(0.804-0.826) | 0.925(0.920-0.929) |
| Rhode Island   | 0.213(0.180-0.251) | 3.338(2.911-3.865) | 0.700(0.656-0.741) | 0.878(0.860-0.895) |
| South Carolina | 0.268(0.244-0.318) | 4.102(3.755-4.862) | 0.756(0.734-0.794) | 0.901(0.892-0.916) |
| South Dakota   | 0.216(0.194-0.257) | 3.377(3.091-3.947) | 0.704(0.677-0.747) | 0.880(0.868-0.897) |
| Tennessee      | 0.310(0.266-0.401) | 4.730(4.079-6.247) | 0.789(0.755-0.840) | 0.914(0.900-0.935) |
| Texas          | 0.295(0.274-0.317) | 4.509(4.197-4.841) | 0.778(0.762-0.793) | 0.910(0.903-0.916) |
| Utah           | 0.226(0.191-0.261) | 3.510(3.046-4.004) | 0.715(0.672-0.750) | 0.884(0.867-0.898) |
| Vermont        | 0.221(0.160-0.253) | 3.446(2.665-3.884) | 0.710(0.625-0.743) | 0.882(0.847-0.895) |
| Virginia       | 0.250(0.218-0.293) | 3.839(3.404-4.469) | 0.739(0.706-0.776) | 0.894(0.881-0.909) |
| Washington     | 0.261(0.220-0.304) | 4.004(3.428-4.648) | 0.750(0.708-0.785) | 0.898(0.881-0.913) |
| West Virginia  | 0.146(0.138-0.181) | 2.496(2.406-2.927) | 0.599(0.584-0.658) | 0.837(0.831-0.861) |
| Wisconsin      | 0.296(0.230-0.344) | 4.527(3.570-5.278) | 0.779(0.720-0.811) | 0.910(0.886-0.923) |
| Wyoming        | 0.127(0.126-0.144) | 2.272(2.260-2.467) | 0.560(0.558-0.595) | 0.821(0.820-0.835) |

---

\*Based on Delta being 2.46 times more infectious than ancestral strains.

**Table S3.** State-specific MAP estimates of  $\beta$  obtained using different datasets. Each 4-month dataset consists of state-specific daily case counts from January 21, 2020 to May 21, 2020. Each 5-month dataset consists of state-specific daily case counts from January 21, 2020 to June 21, 2020. Each 6-month dataset consists of state-specific daily case counts from January 21, 2020 to July 21, 2020.

| State          | $\beta$         |                 |                 |
|----------------|-----------------|-----------------|-----------------|
|                | 4-month dataset | 5-month dataset | 6-month dataset |
| Alabama        | 0.344425688     | 0.391000116     | 0.381114062     |
| Alaska         | 0.207653693     | 0.209267205     | 0.210030786     |
| Arizona        | 0.529445483     | 0.543664926     | 0.532514897     |
| Arkansas       | 0.32298932      | 0.28311954      | 0.279105356     |
| California     | 0.329080014     | 0.386768663     | 0.366219921     |
| Colorado       | 0.381094706     | 0.372505137     | 0.377135113     |
| Connecticut    | 0.449485806     | 0.457835438     | 0.442979285     |
| Delaware       | 0.280036868     | 0.27564221      | 0.284739604     |
| Florida        | 0.526921359     | 0.551352675     | 0.514304171     |
| Georgia        | 0.430531087     | 0.448214949     | 0.438936107     |
| Hawaii         | 0.23746958      | 0.242697953     | 0.247395063     |
| Idaho          | 0.380490164     | 0.402373556     | 0.36290268      |
| Illinois       | 0.498497271     | 0.511225388     | 0.50775665      |
| Indiana        | 0.541857154     | 0.534310158     | 0.534529103     |
| Iowa           | 0.311378197     | 0.284051758     | 0.271908187     |
| Kansas         | 0.300249291     | 0.327199897     | 0.244883859     |
| Kentucky       | 0.346224636     | 0.330082083     | 0.331292779     |
| Louisiana      | 0.488353117     | 0.487004484     | 0.504124433     |
| Maine          | 0.225236222     | 0.225787998     | 0.230958926     |
| Maryland       | 0.398259593     | 0.409012941     | 0.410424365     |
| Massachusetts  | 0.386526299     | 0.379636348     | 0.387649785     |
| Michigan       | 0.602060282     | 0.59887731      | 0.608052362     |
| Minnesota      | 0.263631203     | 0.299947476     | 0.255634342     |
| Mississippi    | 0.446758703     | 0.475310237     | 0.505863769     |
| Missouri       | 0.444622556     | 0.475476797     | 0.439740679     |
| Montana        | 0.220783058     | 0.219834578     | 0.219902109     |
| Nebraska       | 0.244391787     | 0.2457406       | 0.244258417     |
| Nevada         | 0.359673276     | 0.35601223      | 0.361269375     |
| New Hampshire  | 0.273648163     | 0.286714521     | 0.284787414     |
| New Jersey     | 0.656582201     | 0.652491027     | 0.676182424     |
| New Mexico     | 0.289726267     | 0.279879781     | 0.275387246     |
| New York       | 0.535623994     | 0.537427785     | 0.675754416     |
| North Carolina | 0.409013369     | 0.407806714     | 0.416748691     |
| North Dakota   | 0.213348899     | 0.211192131     | 0.211282563     |



|                |             |             |             |
|----------------|-------------|-------------|-------------|
| Ohio           | 0.407742398 | 0.373799884 | 0.396832606 |
| Oklahoma       | 0.367641453 | 0.367742577 | 0.368838695 |
| Oregon         | 0.30011376  | 0.311724057 | 0.305668351 |
| Pennsylvania   | 0.497075654 | 0.49886789  | 0.498607161 |
| Rhode Island   | 0.319663632 | 0.307048589 | 0.317887767 |
| South Carolina | 0.382005702 | 0.377319773 | 0.378889298 |
| South Dakota   | 0.315190829 | 0.310612853 | 0.311311794 |
| Tennessee      | 0.451102391 | 0.435139557 | 0.422615302 |
| Texas          | 0.418736232 | 0.414805718 | 0.429223299 |
| Utah           | 0.31236819  | 0.32286498  | 0.307458597 |
| Vermont        | 0.265564455 | 0.317029863 | 0.303010374 |
| Virginia       | 0.347873875 | 0.353117278 | 0.335591603 |
| Washington     | 0.351809052 | 0.368329925 | 0.353636894 |
| West Virginia  | 0.238034407 | 0.229590329 | 0.235258658 |
| Wisconsin      | 0.386164126 | 0.416429043 | 0.373319249 |
| Wyoming        | 0.210764739 | 0.209001836 | 0.219153861 |

---

**Table S4.** Sensitivity of MAP estimate of  $\beta$  to training dataset. Sensitivity was assessed by computing the relative error between the  $\beta$  estimates obtained from the 5-month dataset and the average  $\beta$  estimate over all datasets considered (i.e., 4-, 5-, and 6-month periods). Each 4-month dataset consists of state-specific daily case counts from January 21, 2020 to May 21, 2020. Each 5-month dataset consists of state-specific daily case counts from January 21, 2020 to June 21, 2020. Each 6-month dataset consists of state-specific daily case counts from January 21, 2020 to July 21, 2020.

| State         | Relative error (%) |
|---------------|--------------------|
| Alabama       | 5.056736841        |
| Alaska        | 0.135565694        |
| Arizona       | 1.580036956        |
| Arkansas      | 4.050499367        |
| California    | 7.230353936        |
| Colorado      | 1.169110891        |
| Connecticut   | 1.71856443         |
| Delaware      | 1.605396619        |
| Florida       | 3.860395675        |
| Georgia       | 2.046222168        |
| Hawaii        | 0.07301952         |
| Idaho         | 5.354867104        |
| Illinois      | 1.067352626        |
| Indiana       | 0.482148062        |
| Iowa          | 1.750513215        |
| Kansas        | 12.52579428        |
| Kentucky      | 1.722236898        |
| Louisiana     | 1.248313993        |
| Maine         | 0.677311718        |
| Maryland      | 0.767179733        |
| Massachusetts | 1.291664711        |
| Michigan      | 0.683144998        |
| Minnesota     | 9.842300289        |
| Mississippi   | 0.140202483        |
| Missouri      | 4.896925896        |
| Montana       | 0.153819893        |
| Nebraska      | 0.385488999        |
| Nevada        | 0.828093273        |
| New Hampshire | 1.774059408        |
| New Jersey    | 1.399445444        |
| New Mexico    | 0.633608589        |
| New York      | 7.806630712        |

|                |             |
|----------------|-------------|
| North Carolina | 0.822704993 |
| North Dakota   | 0.353431338 |
| Ohio           | 4.835068796 |
| Oklahoma       | 0.090108154 |
| Oregon         | 1.9254369   |
| Pennsylvania   | 0.137363347 |
| Rhode Island   | 2.482979345 |
| South Carolina | 0.549584631 |
| South Dakota   | 0.563102005 |
| Tennessee      | 0.262716142 |
| Texas          | 1.453009268 |
| Utah           | 2.747788206 |
| Vermont        | 7.394371088 |
| Virginia       | 2.196551742 |
| Washington     | 2.906929126 |
| West Virginia  | 2.007787943 |
| Wisconsin      | 6.239810825 |
| Wyoming        | 1.86485316  |

---

**Table S5.** Percent progress  $\mathcal{P}$  toward herd immunity for each of the 50 states. This table provides the inputs to Eq. 2 that were used to generate the results plotted in Fig. 8. In Case 1,  $f_r$  is given in column 6. In Case 2,  $f_r$  is given in column 8. Note that  $f_A = 0.44$ . In both cases,  $\varepsilon_v = 0.66$  and  $\varepsilon_r = 1.0$ .

| State         | $S_0$    | $Y_{\text{Delta}}$ | $1 - \frac{1}{Y_{\text{Delta}} \mathcal{R}_0}$ | $N_d/S_0$ | $\left(\frac{N_d}{S_0}\right) \times 5.8$ | $f_s$ | $f_s/(1 - f_A)$ | $f_v$  | $\mathcal{P}$ (Case 1) | $\mathcal{P}$ (Case 2) |
|---------------|----------|--------------------|------------------------------------------------|-----------|-------------------------------------------|-------|-----------------|--------|------------------------|------------------------|
| Alabama       | 4903185  | 2.46               | 0.9044                                         | 0.1575    | 0.9136                                    | 0.292 | 0.5214          | 0.4127 | 103.6217               | 72.0726                |
| Alaska        | 731545   | 2.46               | 0.8213                                         | 0.1390    | 0.8063                                    | 0.093 | 0.1661          | 0.4909 | 105.8143               | 53.1165                |
| Arizona       | 7278717  | 2.46               | 0.9312                                         | 0.1468    | 0.8517                                    | 0.297 | 0.5304          | 0.5029 | 96.7460                | 73.6934                |
| Arkansas      | 3017804  | 2.46               | 0.8679                                         | 0.1609    | 0.9330                                    | 0.252 | 0.4500          | 0.4460 | 109.7714               | 70.5032                |
| California    | 39512223 | 2.46               | 0.9033                                         | 0.1180    | 0.6844                                    | 0.211 | 0.3768          | 0.5788 | 89.1154                | 68.0675                |
| Colorado      | 5758736  | 2.46               | 0.8996                                         | 0.1141    | 0.6616                                    | 0.096 | 0.1714          | 0.5857 | 88.0859                | 54.6621                |
| Connecticut   | 3565287  | 2.46               | 0.9183                                         | 0.1082    | 0.6276                                    | 0.065 | 0.1161          | 0.6774 | 86.4714                | 55.6717                |
| Delaware      | 973764   | 2.46               | 0.8643                                         | 0.1322    | 0.7665                                    | 0.215 | 0.3839          | 0.5679 | 98.8090                | 71.1368                |
| Florida       | 21477737 | 2.46               | 0.9322                                         | 0.1631    | 0.9462                                    | 0.254 | 0.4536          | 0.5584 | 103.6342               | 70.2618                |
| Georgia       | 10617423 | 2.46               | 0.9166                                         | 0.1416    | 0.8212                                    | 0.124 | 0.2214          | 0.4407 | 95.2713                | 48.8630                |
| Hawaii        | 1415872  | 2.46               | 0.8459                                         | 0.0520    | 0.3014                                    | 0.016 | 0.0286          | 0.5701 | 66.7006                | 46.5866                |
| Idaho         | 1787065  | 2.46               | 0.9071                                         | 0.1363    | 0.7908                                    | 0.109 | 0.1946          | 0.4078 | 93.3873                | 45.3530                |
| Illinois      | 12671821 | 2.46               | 0.9269                                         | 0.1265    | 0.7339                                    | 0.319 | 0.5696          | 0.5270 | 89.1686                | 77.6101                |
| Indiana       | 6733219  | 2.46               | 0.9300                                         | 0.1393    | 0.8080                                    | 0.195 | 0.3482          | 0.4768 | 93.3745                | 59.4952                |
| Iowa          | 3155070  | 2.46               | 0.8684                                         | 0.1376    | 0.7983                                    | 0.127 | 0.2268          | 0.5318 | 100.0827               | 57.3692                |
| Kansas        | 2913314  | 2.46               | 0.8857                                         | 0.1375    | 0.7972                                    | 0.085 | 0.1518          | 0.5020 | 97.5952                | 48.8669                |
| Kentucky      | 4467673  | 2.46               | 0.8867                                         | 0.1484    | 0.8607                                    | 0.255 | 0.4554          | 0.5083 | 102.3341               | 71.9576                |
| Louisiana     | 4648794  | 2.46               | 0.9232                                         | 0.1568    | 0.9093                                    | 0.103 | 0.1839          | 0.4436 | 101.3706               | 45.8047                |
| Maine         | 1344212  | 2.46               | 0.8344                                         | 0.0624    | 0.3621                                    | 0.05  | 0.0893          | 0.6748 | 77.4412                | 59.3086                |
| Maryland      | 6045680  | 2.46               | 0.9086                                         | 0.0861    | 0.4993                                    | 0.293 | 0.5232          | 0.6328 | 77.9720                | 79.5039                |
| Massachusetts | 6892503  | 2.46               | 0.9015                                         | 0.1154    | 0.6694                                    | 0.086 | 0.1536          | 0.6725 | 90.5334                | 58.7074                |
| Michigan      | 9986857  | 2.46               | 0.9376                                         | 0.1117    | 0.6480                                    | 0.281 | 0.5018          | 0.5172 | 81.9332                | 71.6587                |
| Minnesota     | 5639632  | 2.46               | 0.8753                                         | 0.1213    | 0.7036                                    | 0.112 | 0.2000          | 0.5752 | 93.2384                | 57.5475                |
| Mississippi   | 2976149  | 2.46               | 0.9213                                         | 0.1600    | 0.9278                                    | 0.338 | 0.6036          | 0.4213 | 102.8846               | 77.4756                |
| Missouri      | 6137428  | 2.46               | 0.9214                                         | 0.1335    | 0.7744                                    | 0.237 | 0.4232          | 0.4700 | 91.6428                | 65.3515                |
| Montana       | 1068778  | 2.46               | 0.8299                                         | 0.1324    | 0.7678                                    | 0.085 | 0.1518          | 0.4774 | 101.3321               | 50.4968                |

|                |          |      |        |        |        |       |        |        |          |         |
|----------------|----------|------|--------|--------|--------|-------|--------|--------|----------|---------|
| Nebraska       | 1934408  | 2.46 | 0.8478 | 0.1340 | 0.7772 | 0.109 | 0.1946 | 0.5367 | 100.9768 | 56.6056 |
| Nevada         | 3080156  | 2.46 | 0.8950 | 0.1339 | 0.7764 | 0.267 | 0.4768 | 0.4982 | 94.9681  | 72.4986 |
| New Hampshire  | 1359711  | 2.46 | 0.8696 | 0.0849 | 0.4923 | 0.065 | 0.1161 | 0.6099 | 80.1139  | 54.2680 |
| New Jersey     | 8882190  | 2.46 | 0.9427 | 0.1278 | 0.7410 | 0.303 | 0.5411 | 0.6347 | 90.1171  | 77.7900 |
| New Mexico     | 2096829  | 2.46 | 0.8664 | 0.1174 | 0.6811 | 0.12  | 0.2143 | 0.6215 | 93.7109  | 61.9322 |
| New York       | 19453561 | 2.46 | 0.9304 | 0.1221 | 0.7080 | 0.123 | 0.2196 | 0.6256 | 89.0551  | 58.2348 |
| North Carolina | 10488084 | 2.46 | 0.9083 | 0.1286 | 0.7456 | 0.226 | 0.4036 | 0.4868 | 91.0880  | 65.5284 |
| North Dakota   | 762062   | 2.46 | 0.8229 | 0.1654 | 0.9594 | -     | -      | 0.4333 | 117.9901 | 34.7532 |
| Ohio           | 11689100 | 2.46 | 0.9000 | 0.1157 | 0.6709 | 0.333 | 0.5946 | 0.4961 | 86.5202  | 80.8211 |
| Oklahoma       | 3956971  | 2.46 | 0.8983 | 0.1511 | 0.8766 | 0.111 | 0.1982 | 0.4647 | 101.7986 | 49.4386 |
| Oregon         | 4217737  | 2.46 | 0.8800 | 0.0742 | 0.4306 | 0.071 | 0.1268 | 0.5987 | 74.4978  | 53.6129 |
| Pennsylvania   | 12801989 | 2.46 | 0.9250 | 0.1080 | 0.6265 | 0.226 | 0.4036 | 0.5691 | 82.8942  | 67.8431 |
| Rhode Island   | 1059361  | 2.46 | 0.8782 | 0.1599 | 0.9272 | 0.103 | 0.1839 | 0.6696 | 109.2411 | 62.0112 |
| South Carolina | 5148714  | 2.46 | 0.9009 | 0.1613 | 0.9353 | 0.262 | 0.4679 | 0.4595 | 105.9958 | 69.8451 |
| South Dakota   | 884659   | 2.46 | 0.8796 | 0.1587 | 0.9205 | 0.341 | 0.6089 | 0.5076 | 107.6770 | 84.1227 |
| Tennessee      | 6829174  | 2.46 | 0.9141 | 0.1703 | 0.9880 | 0.266 | 0.4750 | 0.4411 | 108.4681 | 68.6860 |
| Texas          | 28995881 | 2.46 | 0.9098 | 0.1358 | 0.7879 | 0.319 | 0.5696 | 0.5019 | 94.3166  | 78.2778 |
| Utah           | 3205958  | 2.46 | 0.8842 | 0.1542 | 0.8946 | 0.293 | 0.5232 | 0.4954 | 105.0729 | 76.8066 |
| Vermont        | 623989   | 2.46 | 0.8820 | 0.0509 | 0.2952 | 0.018 | 0.0321 | 0.6893 | 69.8241  | 53.5661 |
| Virginia       | 8535519  | 2.46 | 0.8941 | 0.0980 | 0.5682 | 0.173 | 0.3089 | 0.5953 | 82.5214  | 64.9181 |
| Washington     | 7614893  | 2.46 | 0.8985 | 0.0828 | 0.4802 | 0.07  | 0.1250 | 0.6223 | 77.2079  | 53.9088 |
| West Virginia  | 1792147  | 2.46 | 0.8371 | 0.1252 | 0.7263 | 0.09  | 0.1607 | 0.4015 | 95.4285  | 45.7627 |
| Wisconsin      | 5822534  | 2.46 | 0.9102 | 0.1339 | 0.7769 | 0.285 | 0.5089 | 0.5563 | 94.3549  | 75.7240 |
| Wyoming        | 578759   | 2.46 | 0.8211 | 0.1477 | 0.8568 | 0.308 | 0.5500 | 0.4063 | 109.0295 | 81.6820 |

**Table S6.** Comparison of estimates of the basic reproduction number  $\mathcal{R}_0$  for ancestral strains of SARS-CoV-2 from four different studies for each of the 30 states considered in all of the studies.

| State         | $\mathcal{R}_0$ estimate |           |           |           |
|---------------|--------------------------|-----------|-----------|-----------|
|               | This study               | Ref. [16] | Ref. [17] | Ref. [18] |
| Kansas        | 4.25                     | 1.418     | 2.363     | 4.212     |
| Michigan      | 5.91                     | 1.299     | 2.234     | 4.166     |
| Montana       | 4.204                    | 2.447     | 2.196     | 3.294     |
| Maine         | 4.049                    | 2.077     | 2.286     | 3.463     |
| Colorado      | 4.977                    | 3.18      | 2.675     | 5.143     |
| Tennessee     | 2.996                    | 1.387     | 1.886     | 3.109     |
| Louisiana     | 5.994                    | 1.803     | 2.285     | 5.284     |
| Kentucky      | 4.872                    | 2.914     | 2.311     | 5.629     |
| Iowa          | 5.294                    | 4.558     | 2.376     | 3.703     |
| Connecticut   | 4.446                    | 3.145     | 2.584     | 4.133     |
| Arizona       | 4.127                    | 3.011     | 2.805     | 3.309     |
| Ohio          | 6.51                     | 5.083     | 2.002     | 7.533     |
| Hawaii        | 3.261                    | 1.599     | 2.467     | 3.013     |
| Massachusetts | 5.167                    | 1.314     | 2.247     | 7.707     |
| Mississippi   | 5.169                    | 1.258     | 2.234     | 5.277     |
| Nebraska      | 3.87                     | 1.217     | 2.131     | 3.759     |
| Alaska        | 7.093                    | 1.357     | 2.961     | 6.814     |
| South Dakota  | 3.042                    | 4.558     | 1.899     | 2.9       |
| Alabama       | 5.842                    | 6.463     | 3.275     | 4.246     |
| Florida       | 4.433                    | 2.774     | 2.558     | 4.895     |
| Delaware      | 4.063                    | 1.473     | 2.596     | 4.938     |
| Nevada        | 3.998                    | 2.368     | 2.118     | 4.903     |
| California    | 5.423                    | 1.028     | 2.714     | 4.839     |
| Maryland      | 3.338                    | 2.82      | 2.247     | 2.817     |
| Oregon        | 4.102                    | 1.321     | 1.963     | 4.647     |
| Idaho         | 4.73                     | 1.191     | 2.428     | 5.07      |
| Illinois      | 4.509                    | 0.947     | 2.402     | 4.396     |
| New Jersey    | 3.839                    | 1.403     | 2.079     | 3.453     |
| Arizona       | 4.004                    | 1.652     | 1.274     | 3.46      |
| Georgia       | 4.527                    | 2.267     | 2.493     | 5.406     |

**Figure S1.** Consistency of results obtained from different codes used to perform Markov chain Monte Carlo (MCMC) sampling. Shown here are 1-dimensional marginal posteriors of parameters for Wyoming ( $n = 0$ ) derived using the Python code of Lin et al. [1] (blue) and PyBioNetFit [4] (red).

# Wyoming

Posterior Distribution

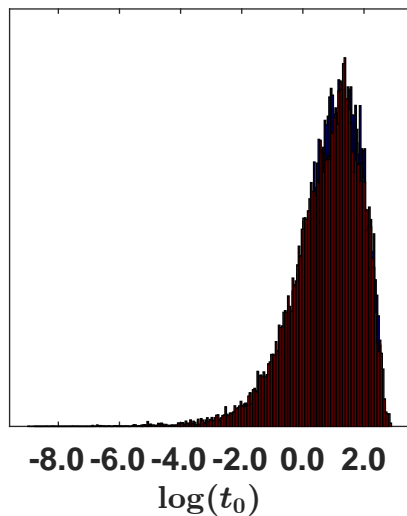

Posterior Distribution

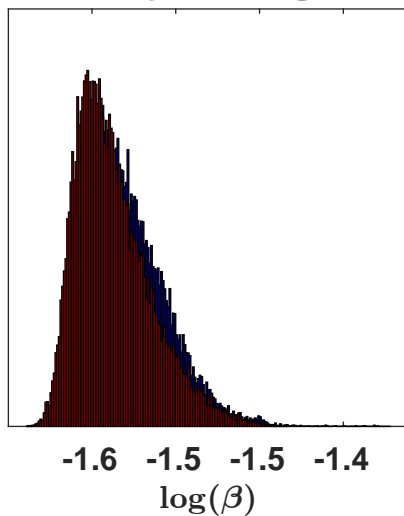

Posterior Distribution

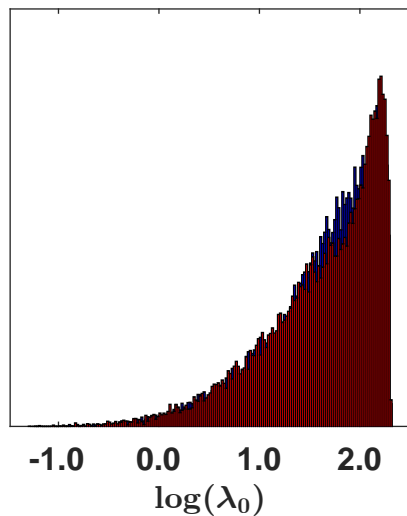

Posterior Distribution

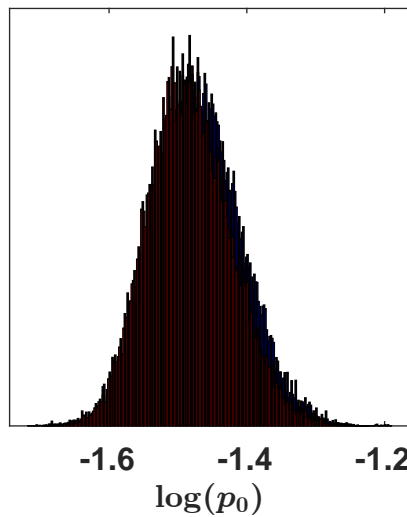

Posterior Distribution

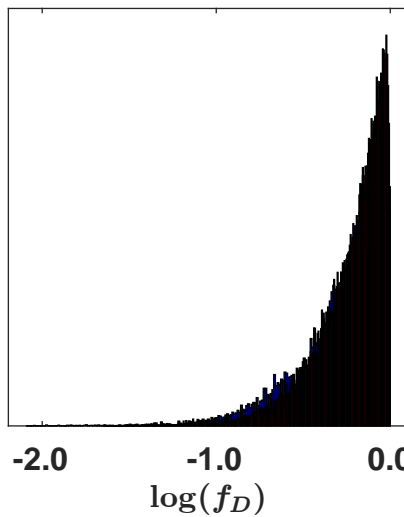

Posterior Distribution

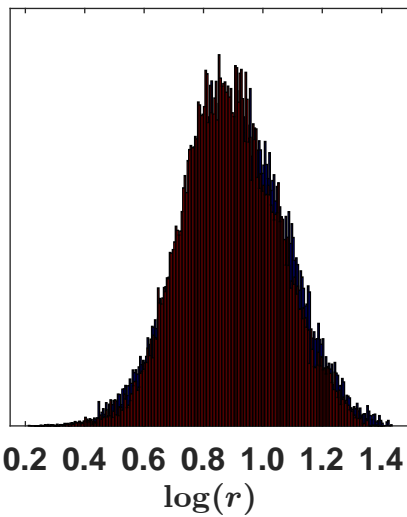



**Figure S2.** Markov chain log-likelihood trace plots for each of the 50 US states. Bayesian inference was conditioned on the compartmental model of Lin et al. [1]. Bayesian inference was performed as described by Lin et al. [1] except that training data consisted of daily COVID-19 case counts for states (vs. case counts for metropolitan statistical areas). The compartmental model accounts for an initial social distancing period followed by  $n$  additional periods. We considered  $n = 0, 1$  and  $2$  and selected the best  $n$  using the model selection procedure described by Lin et al. [1]. The number of epochs (or iterations) used for each state was chosen so that convergence was achieved in each case. Inferences are based on daily reports of new cases of COVID-19 from January 21 to June 21, 2020.

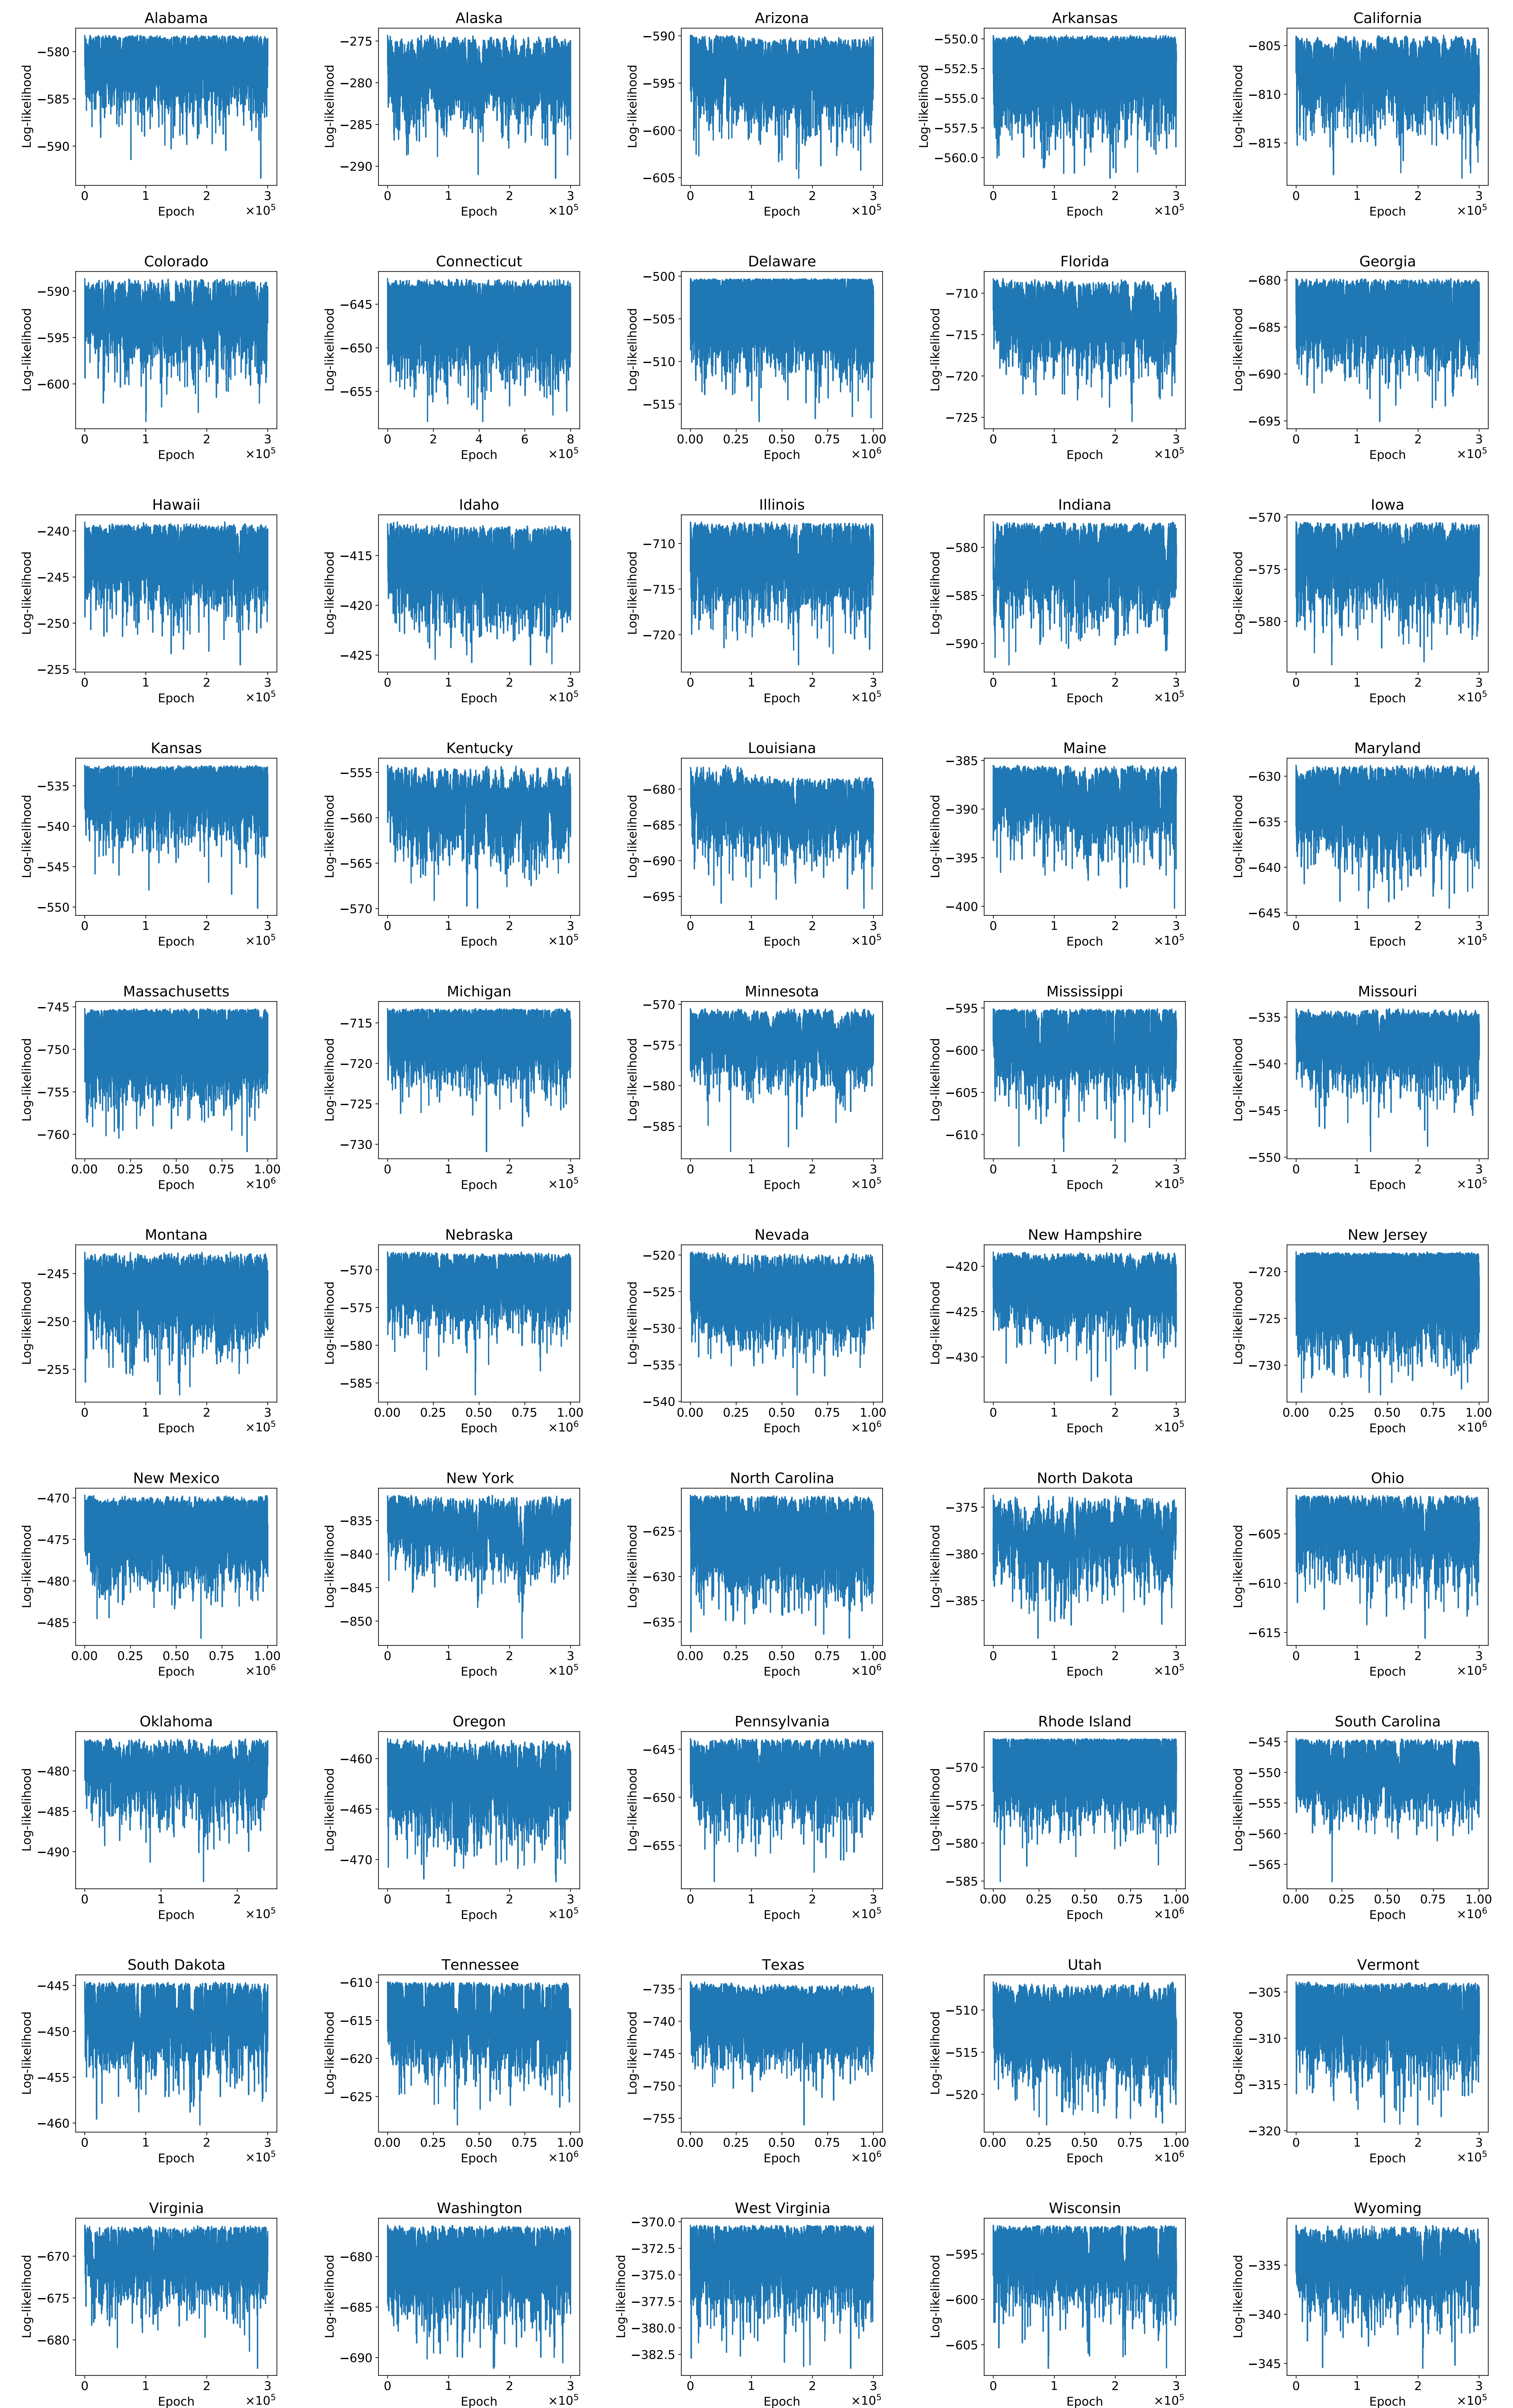

**Figure S3.** Parameter trace plots for each of the 50 US states. These parameter trace plots are matched to the likelihood trace plots of Fig S2. It should be noted that the number of parameters varies across the states depending on the selected value of  $n$ . See the caption of Fig S2 for additional details.

# Alabama

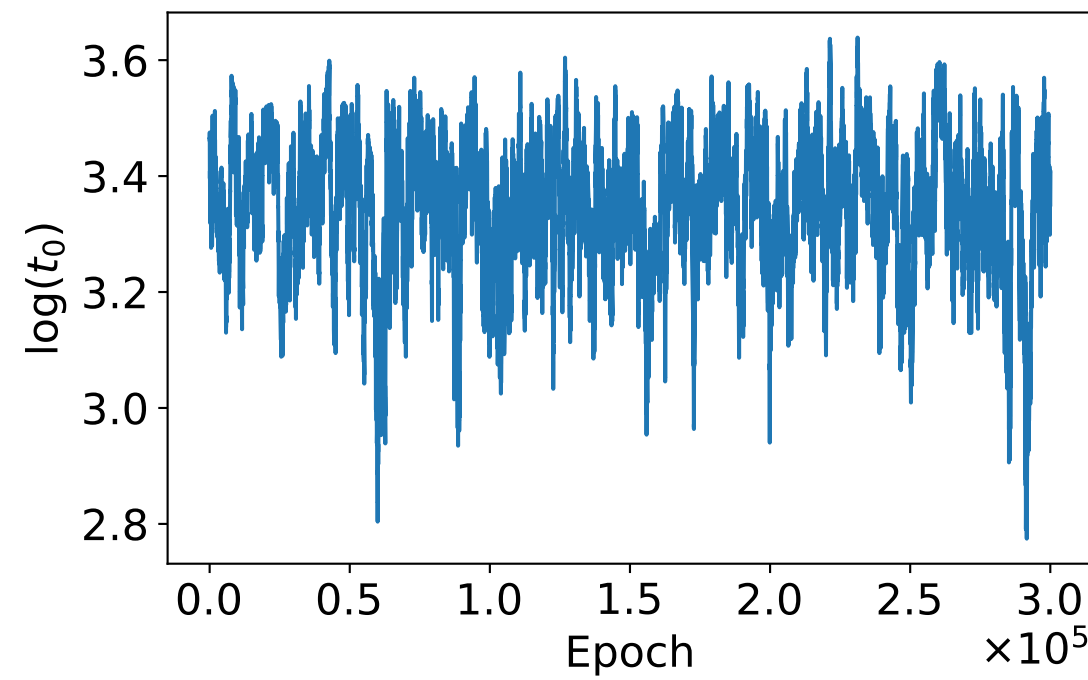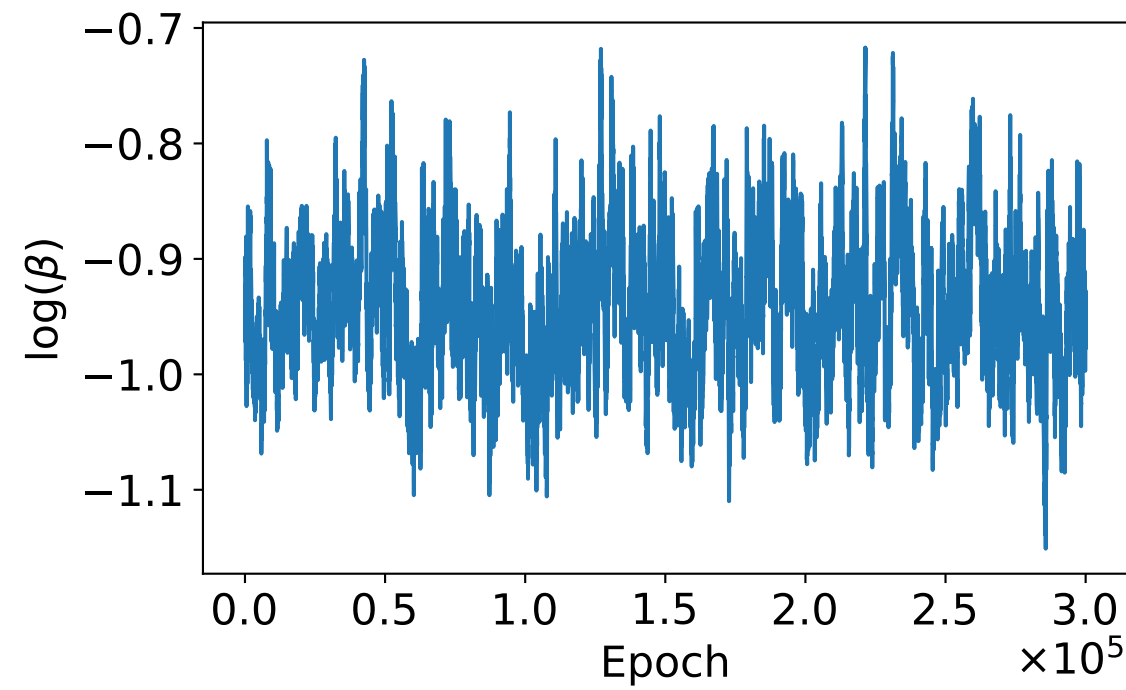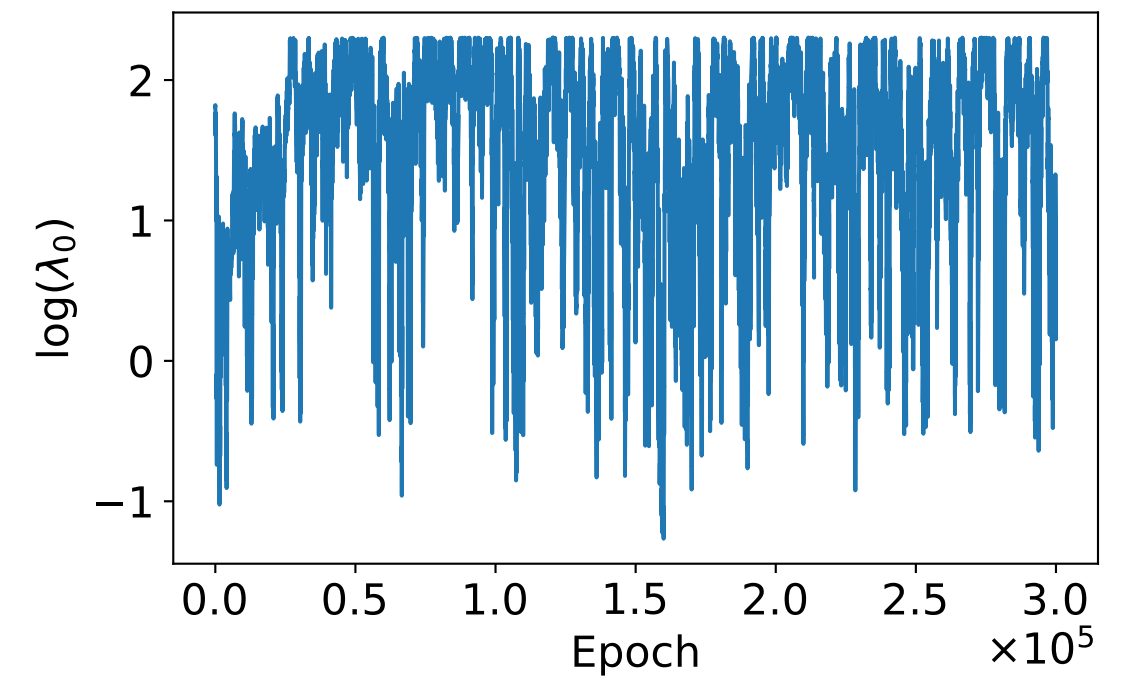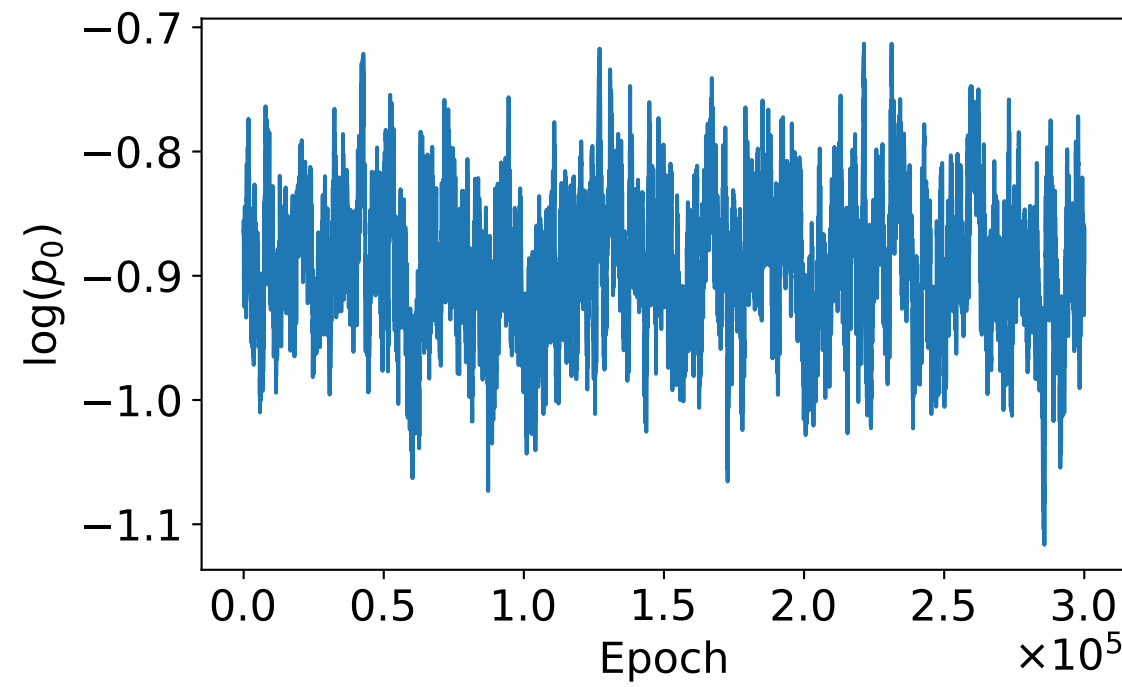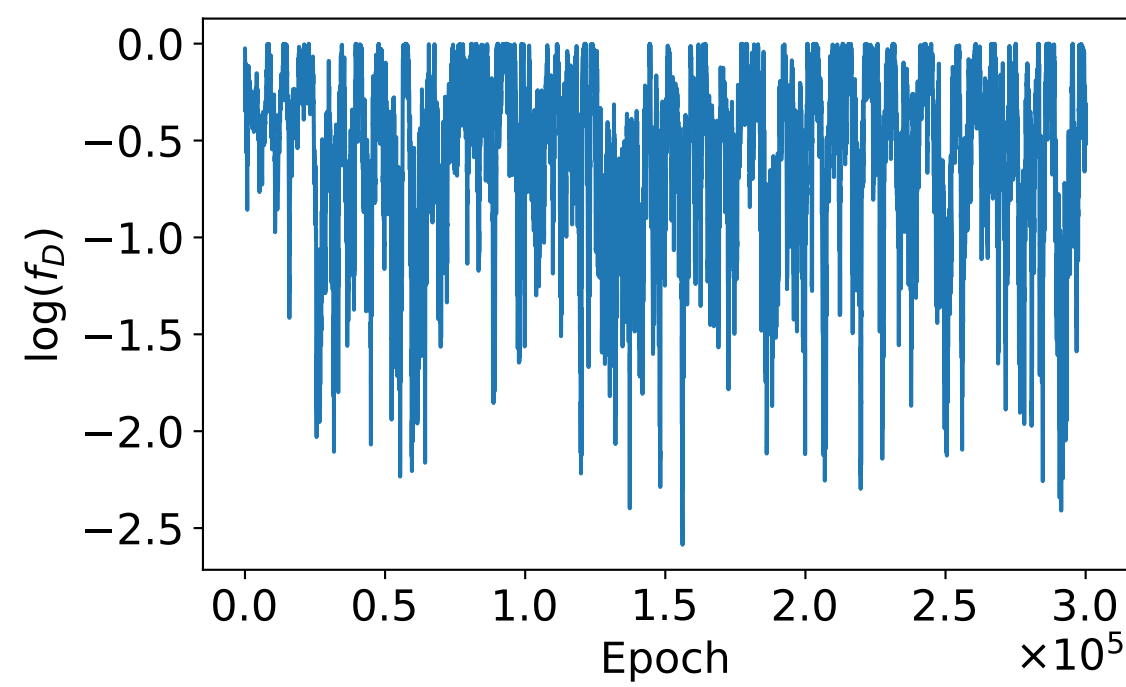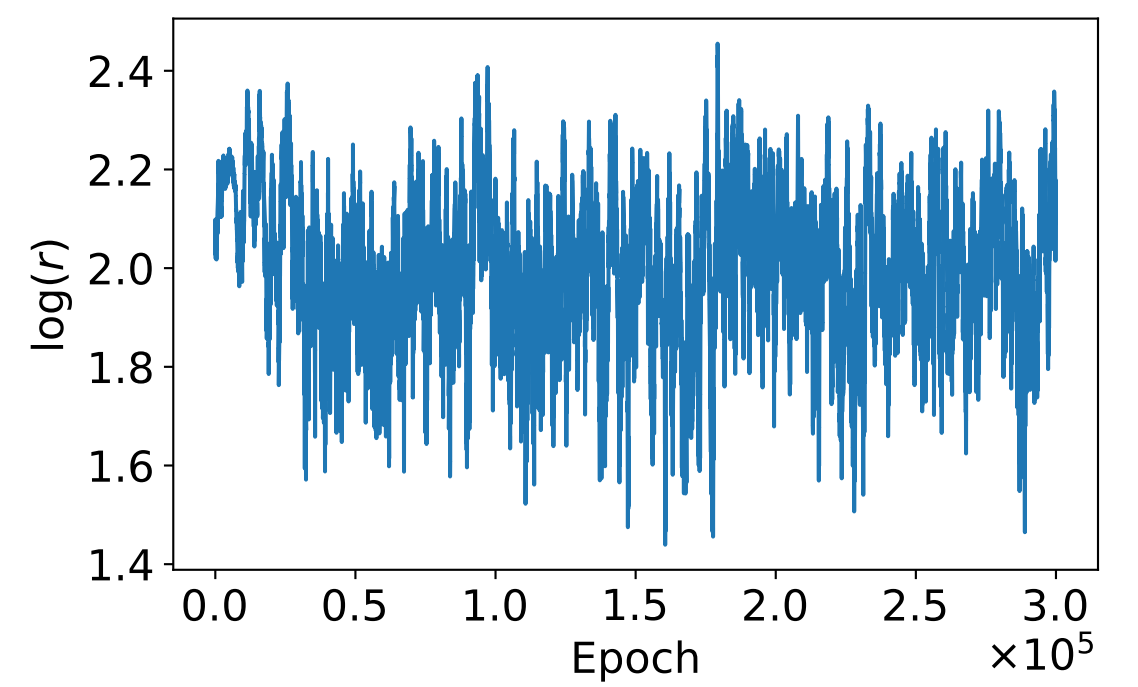

# Alaska

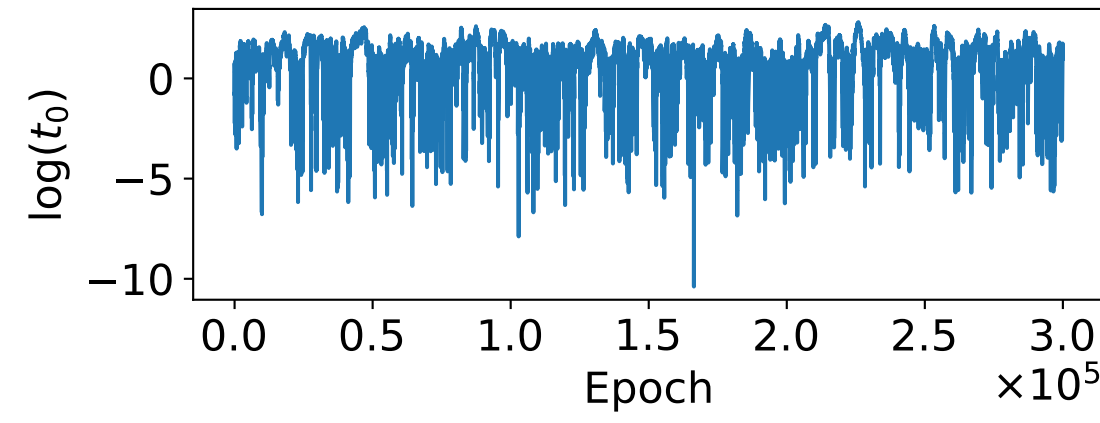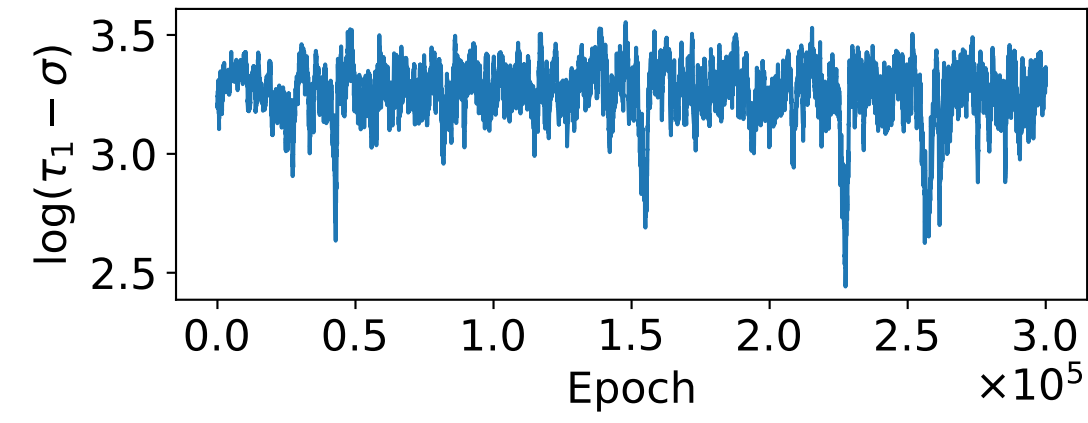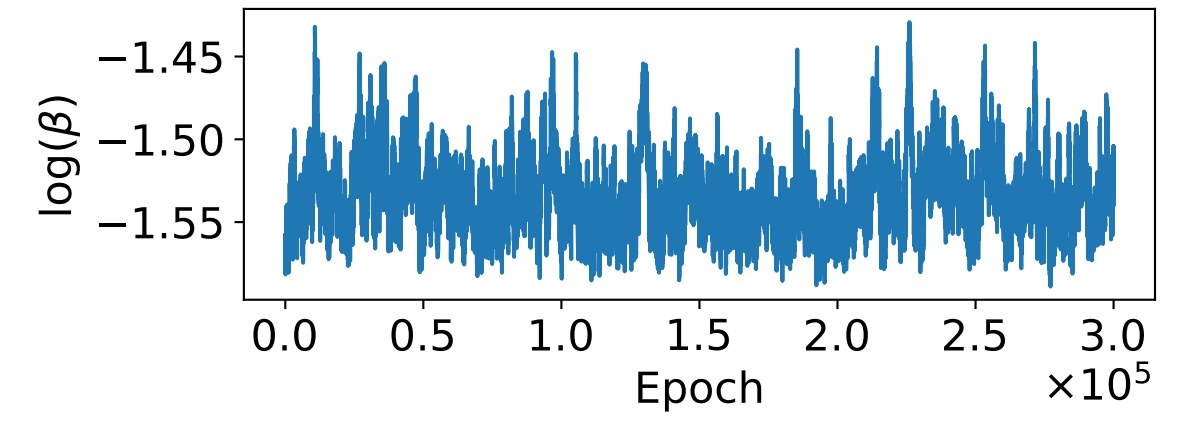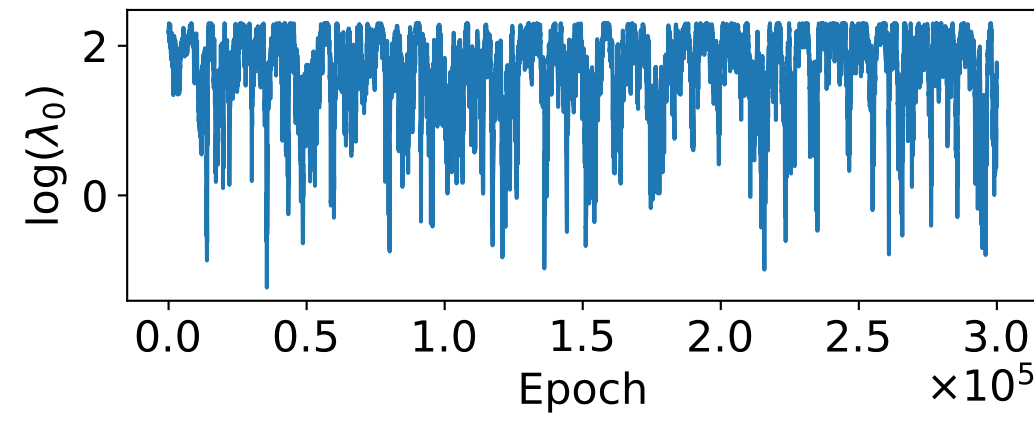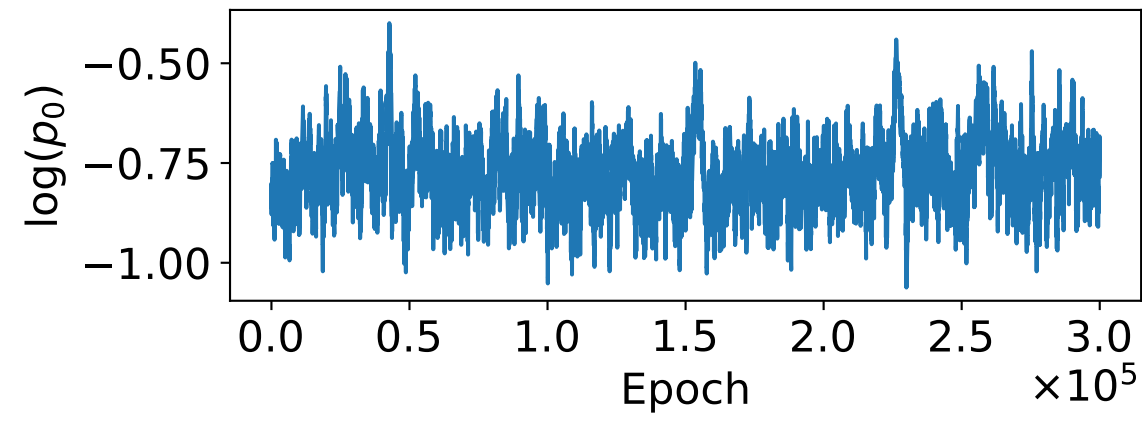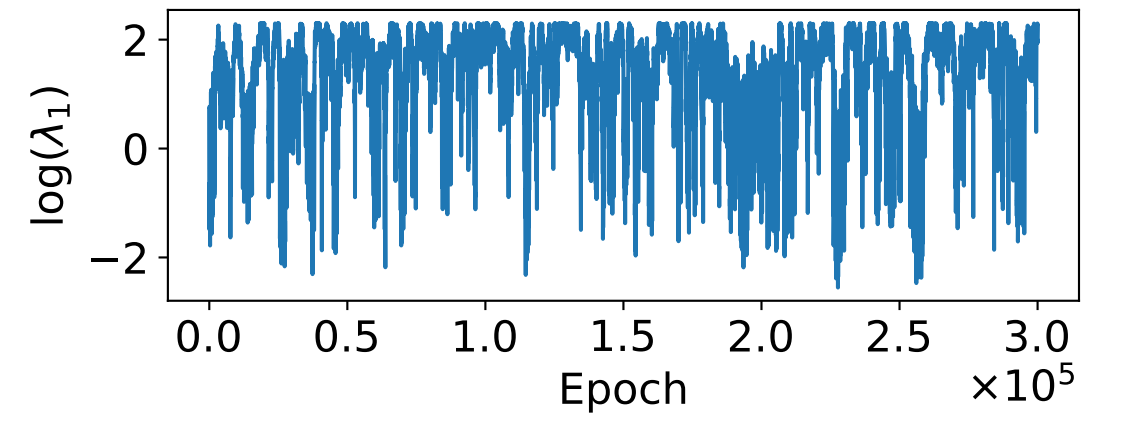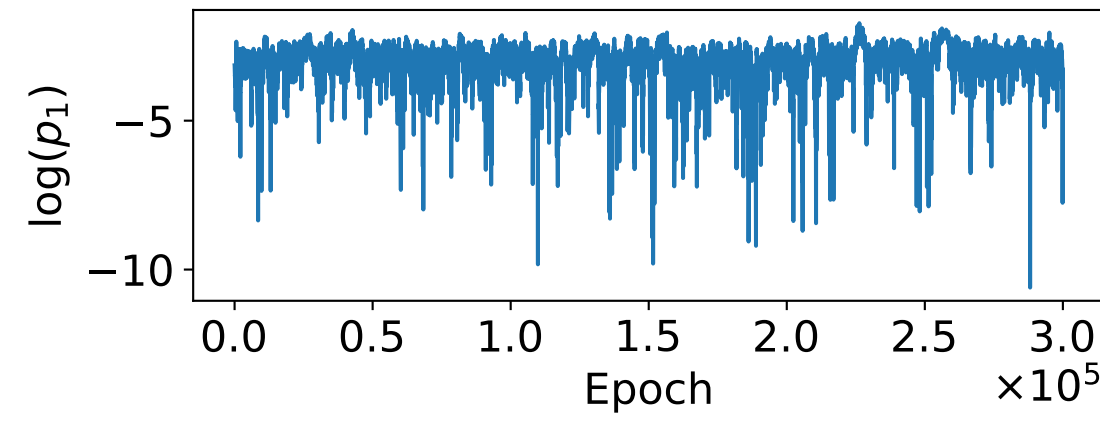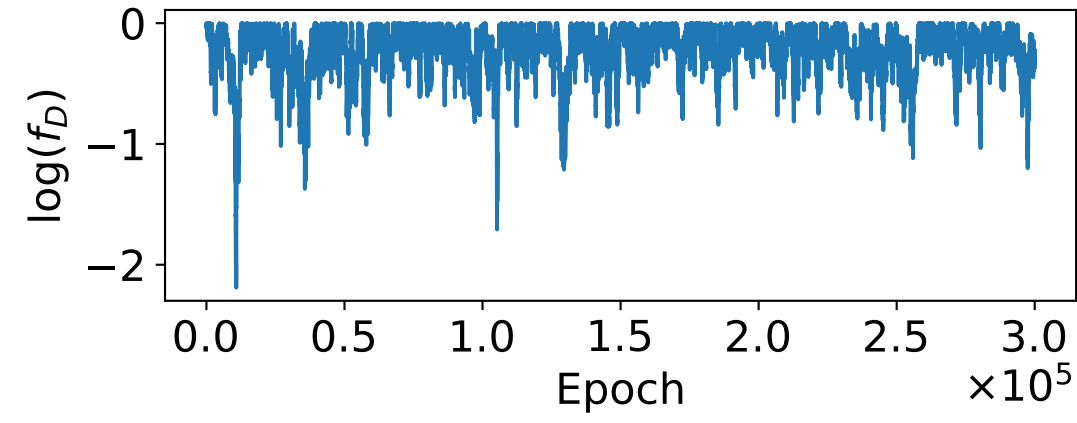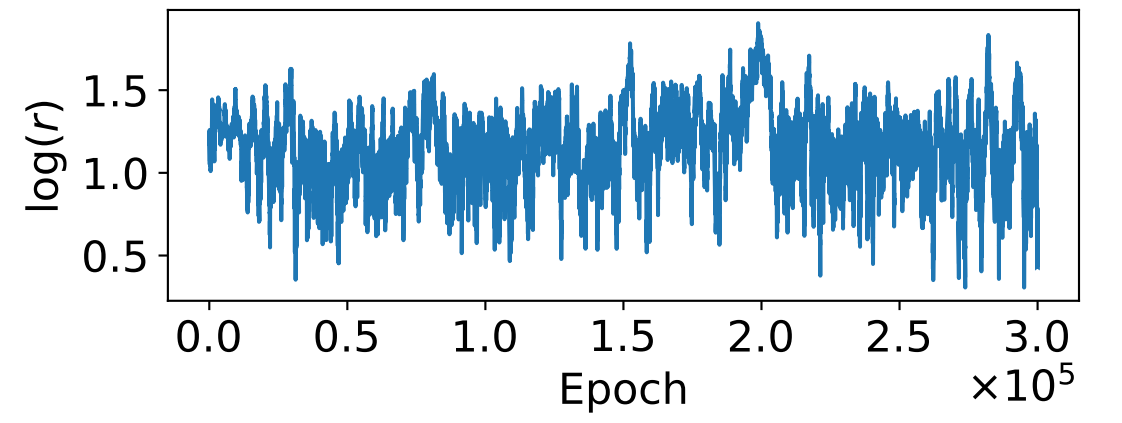



# Arizona

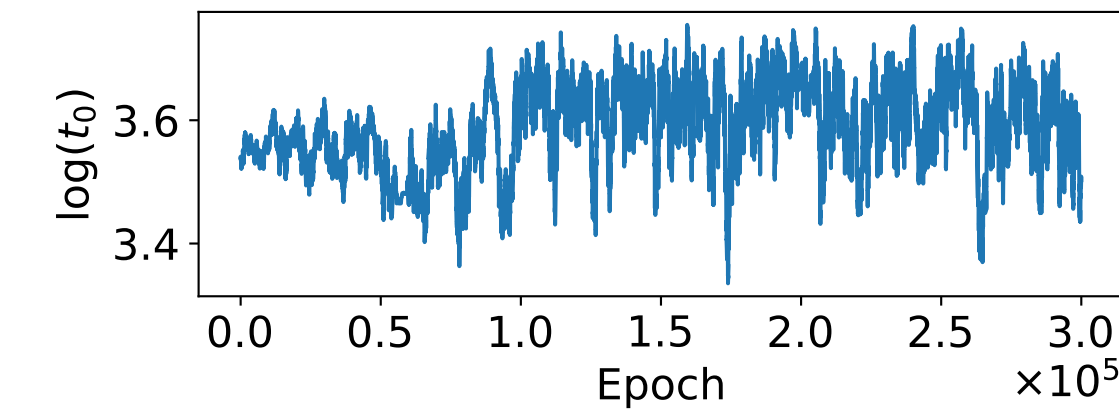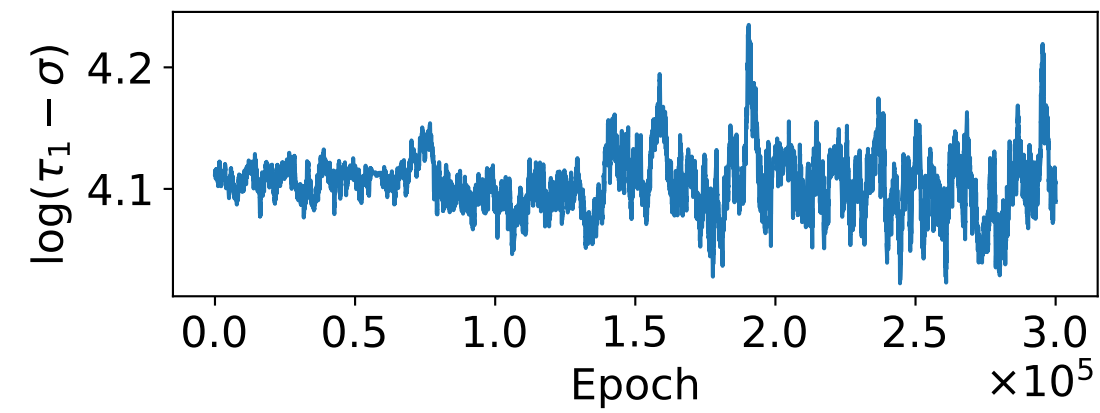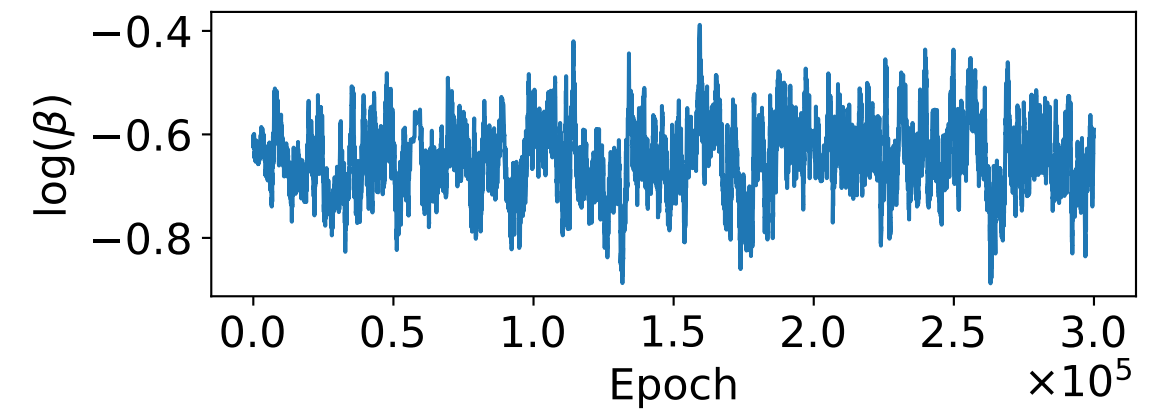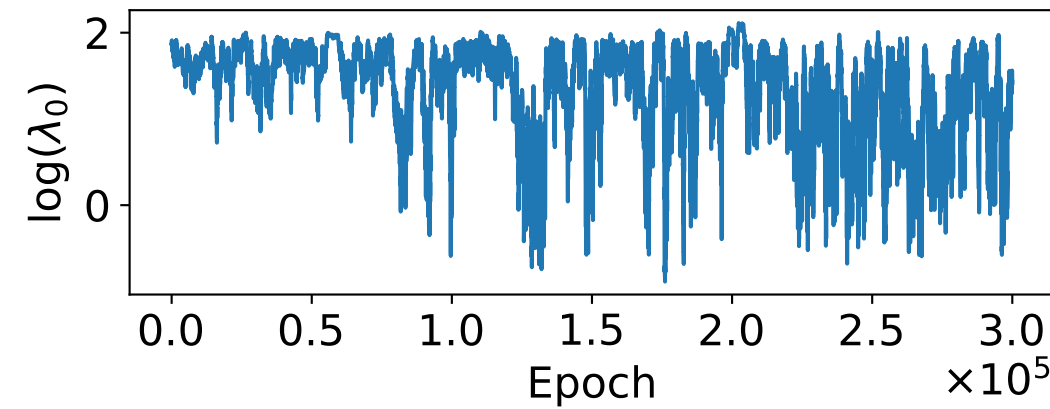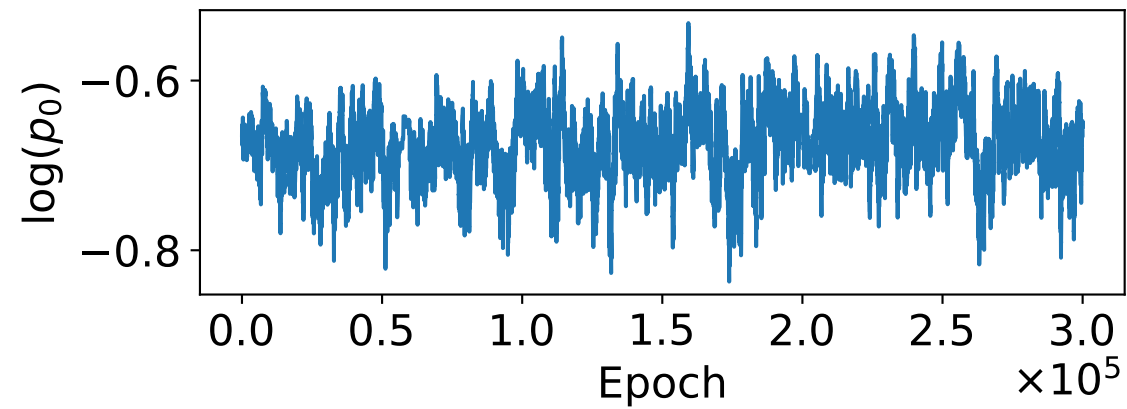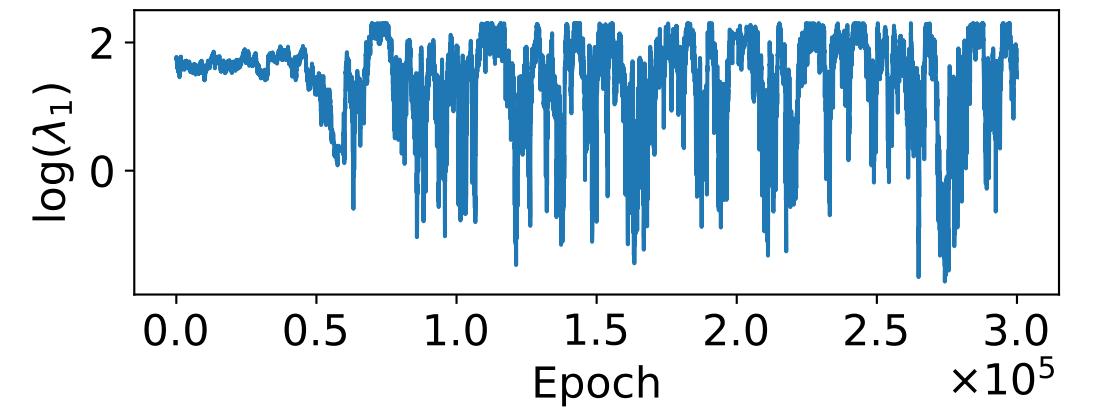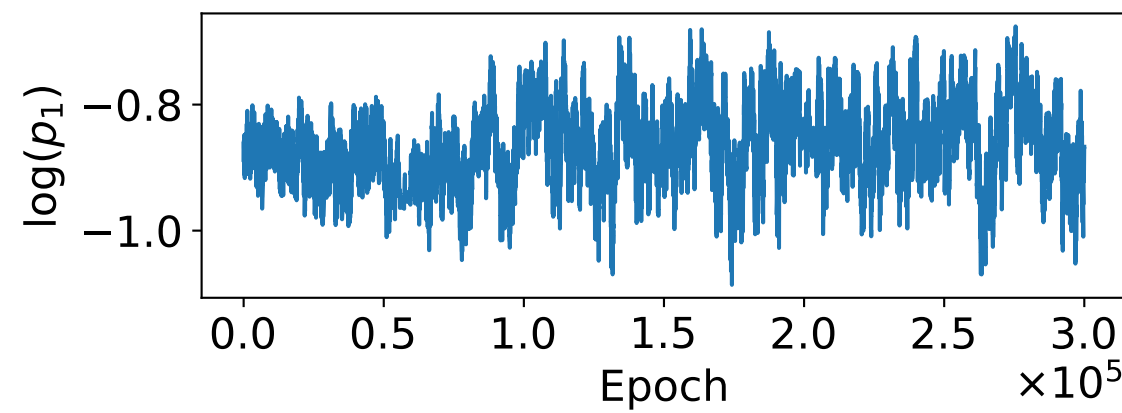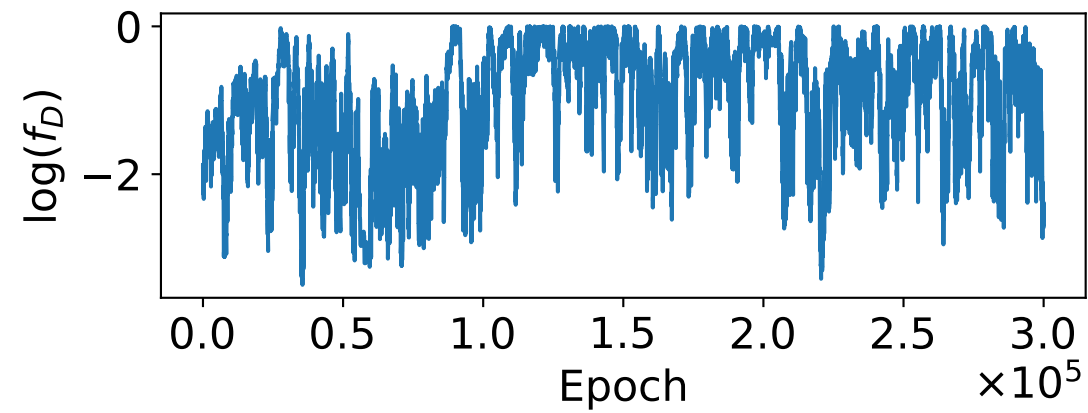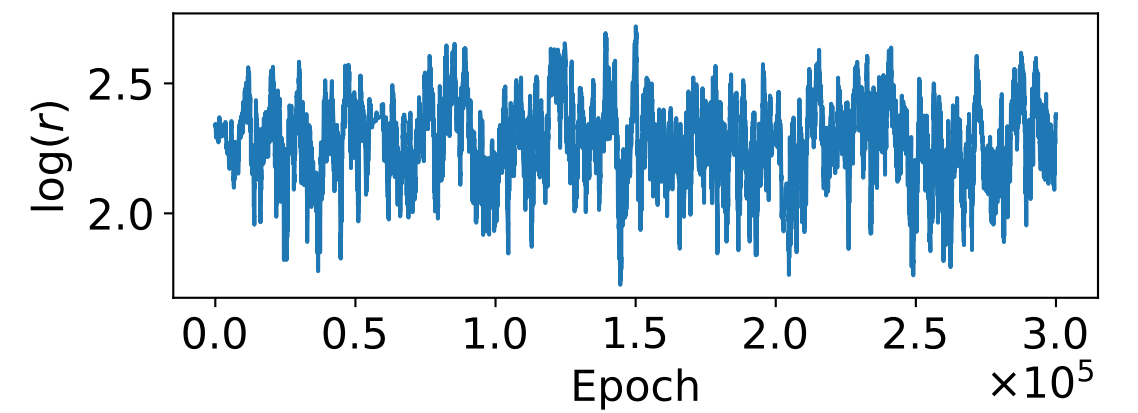

# Arkansas

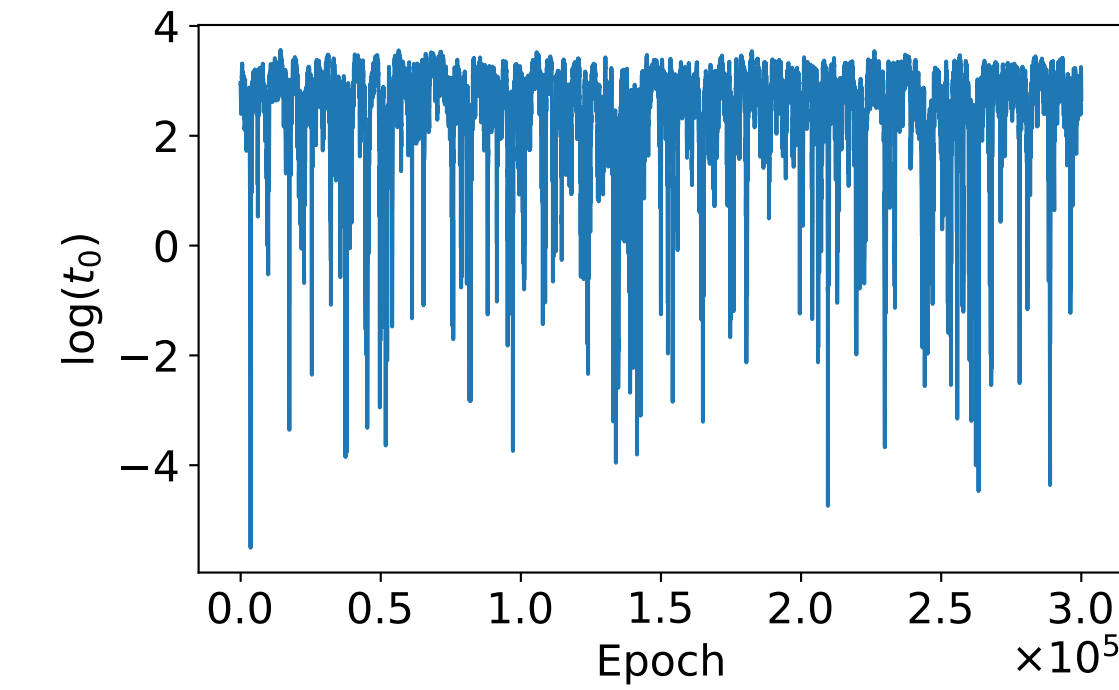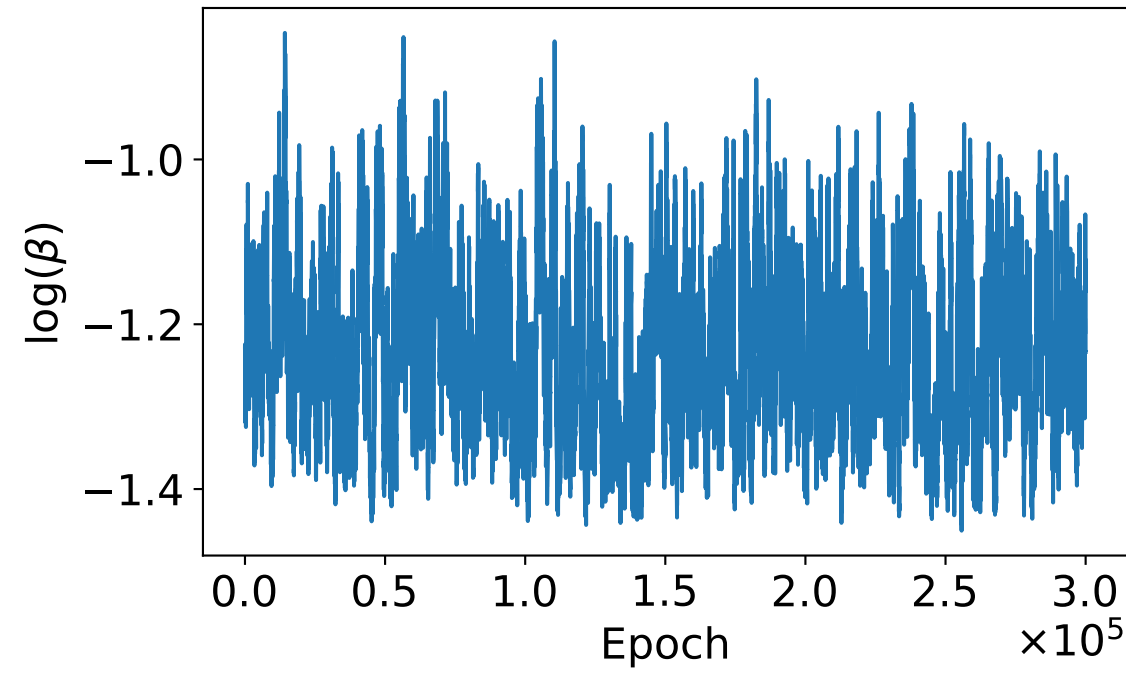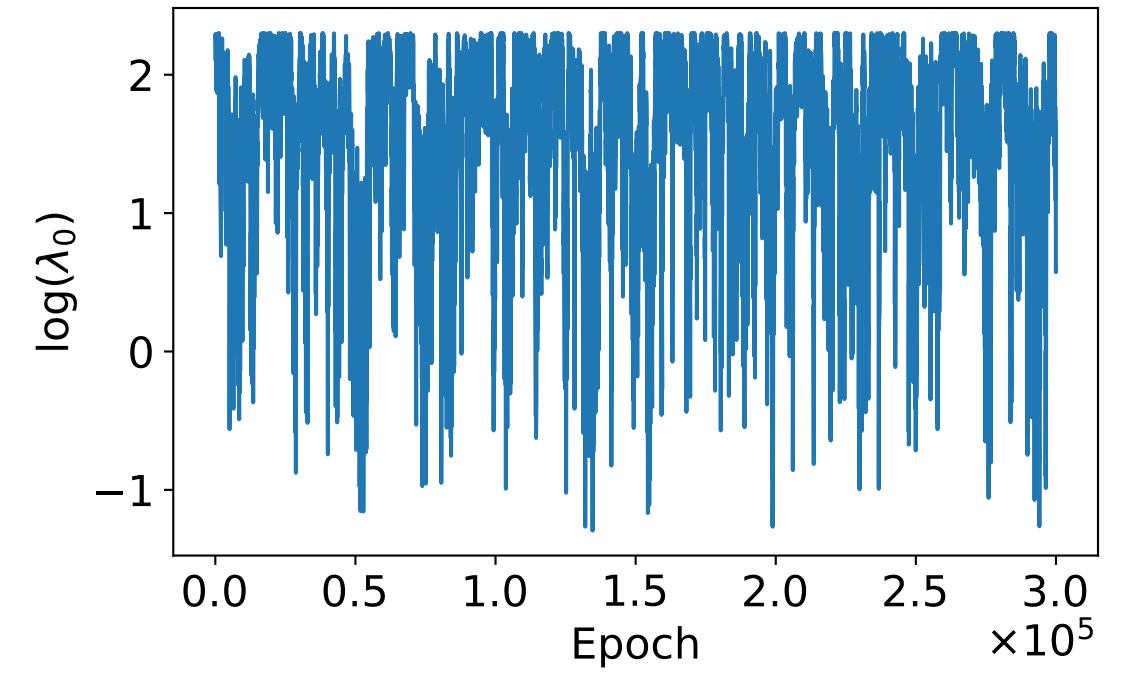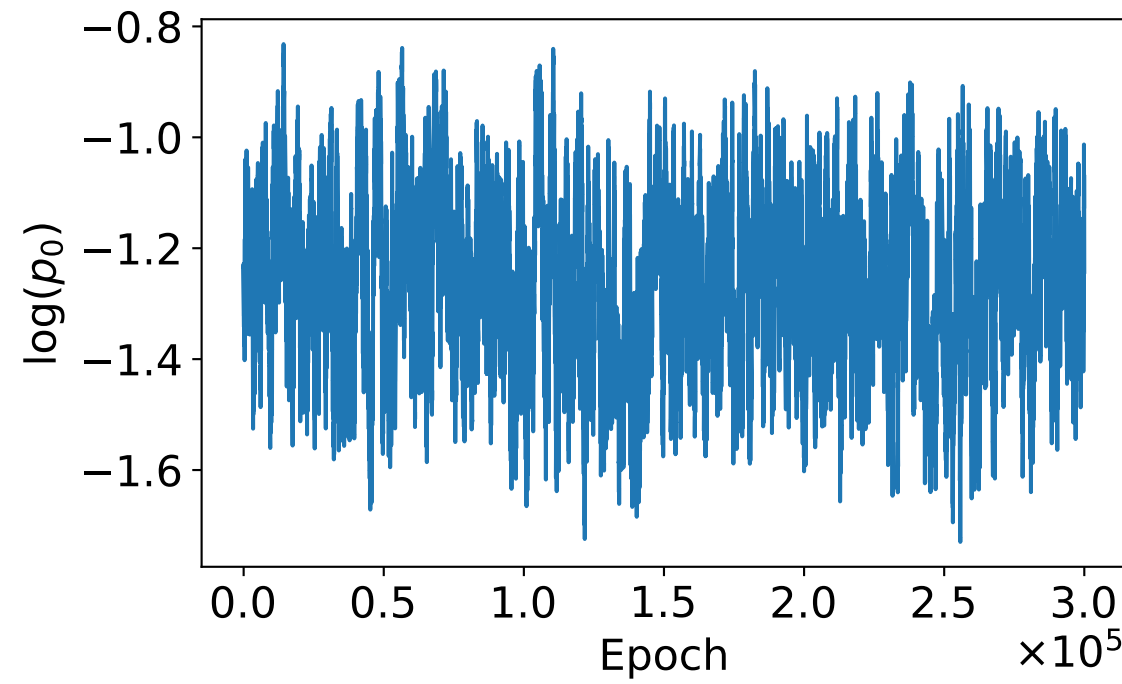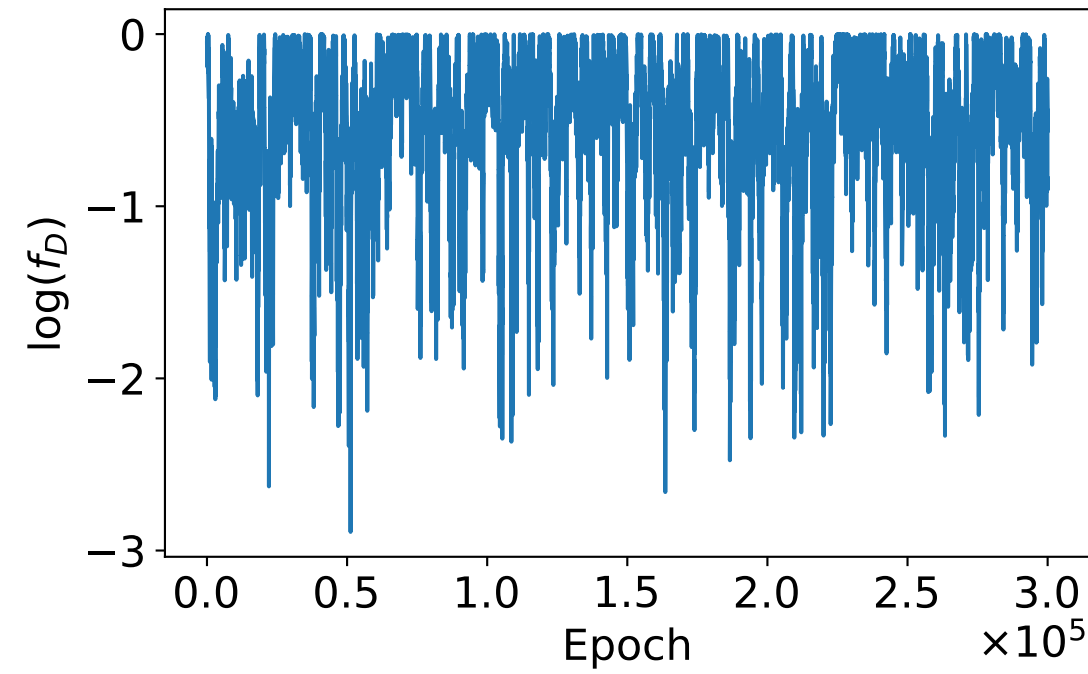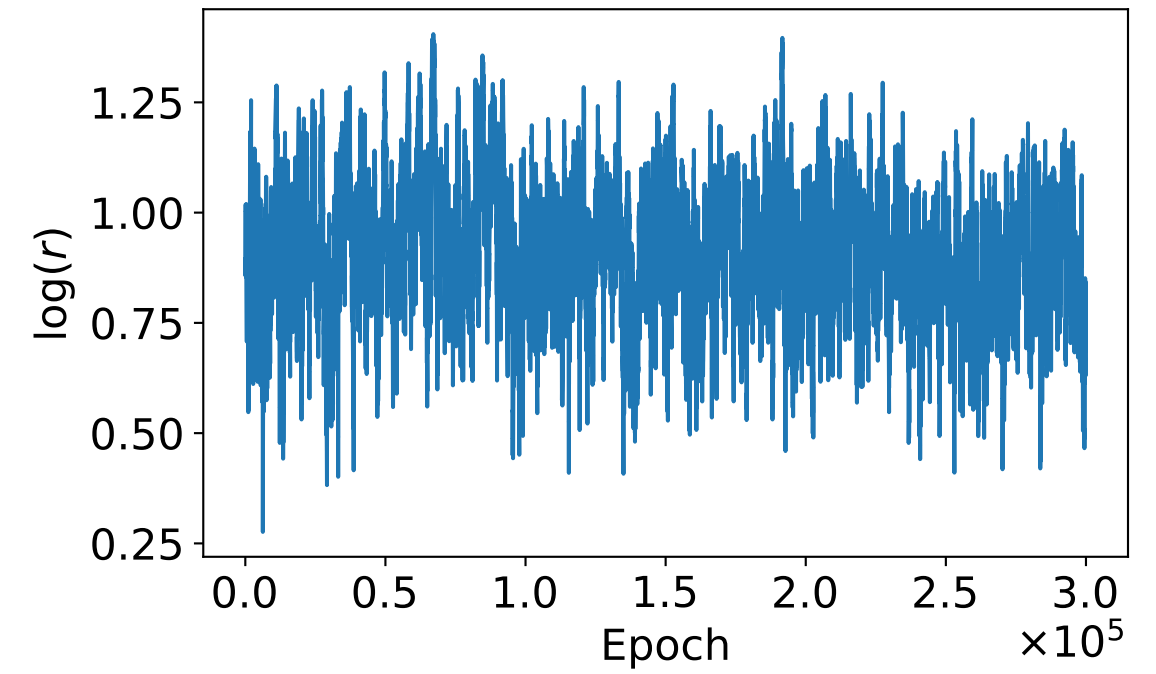

# California

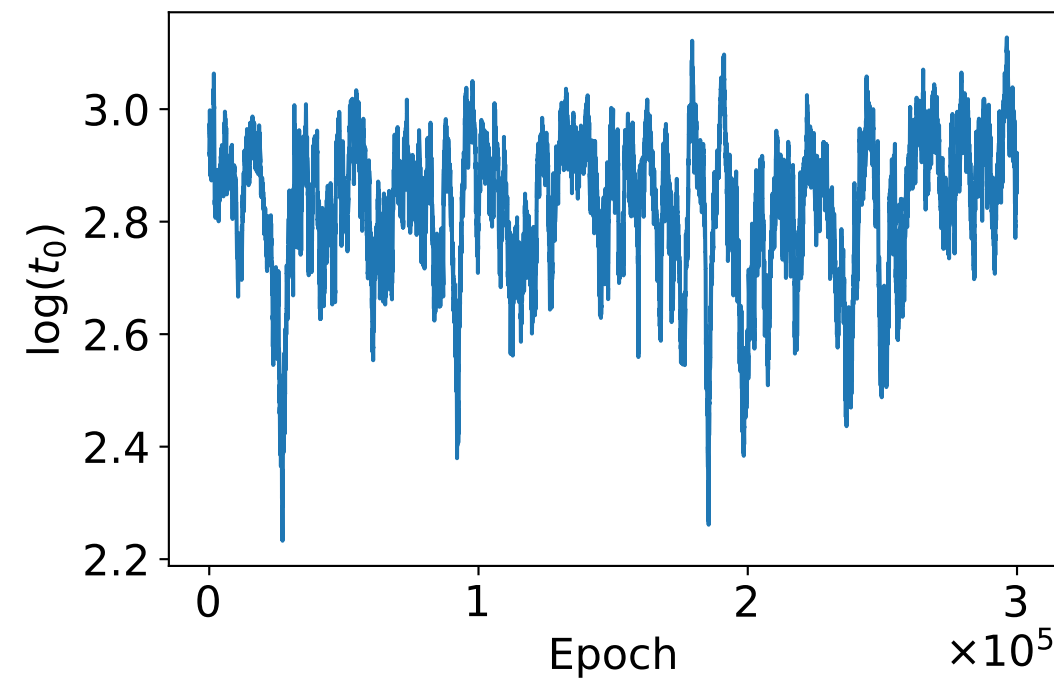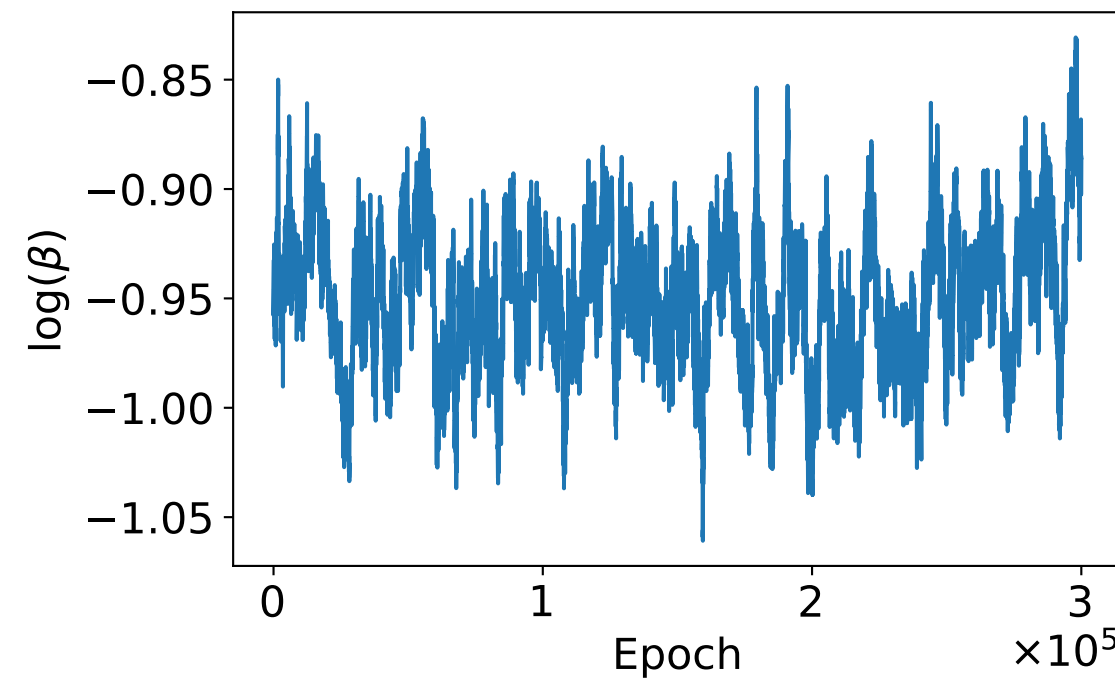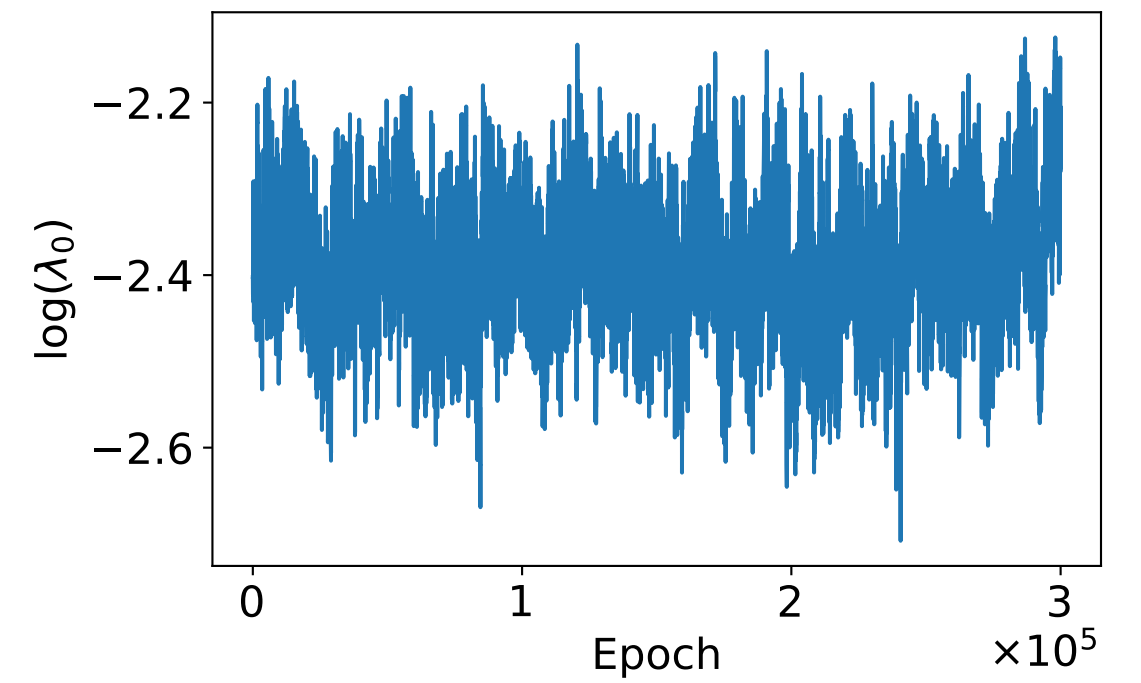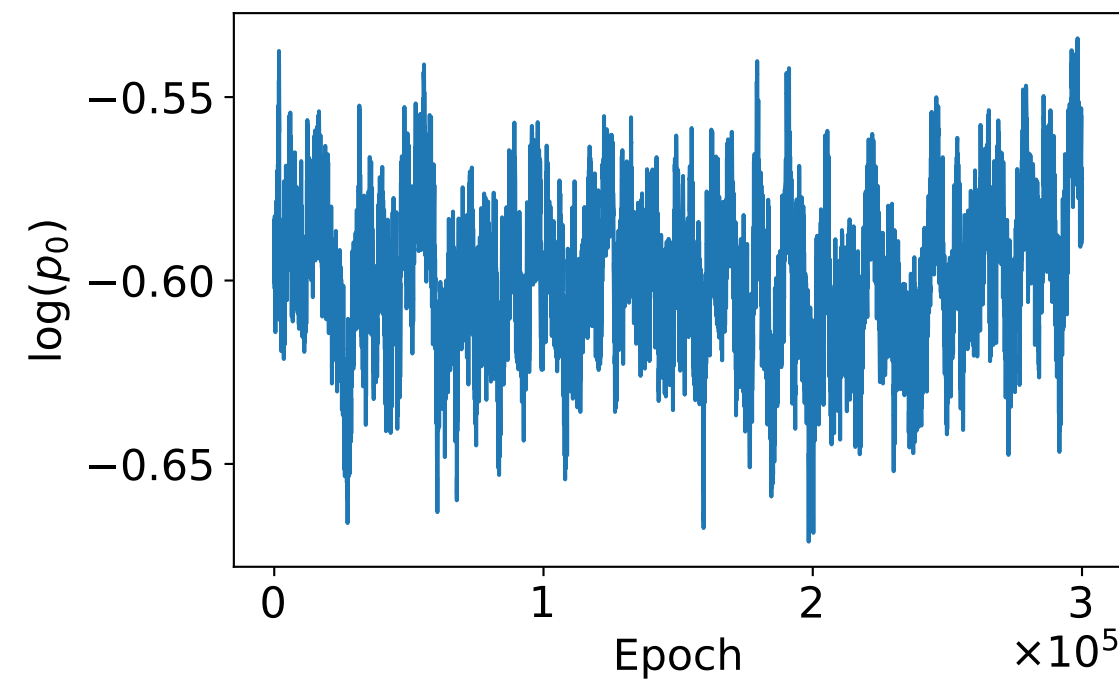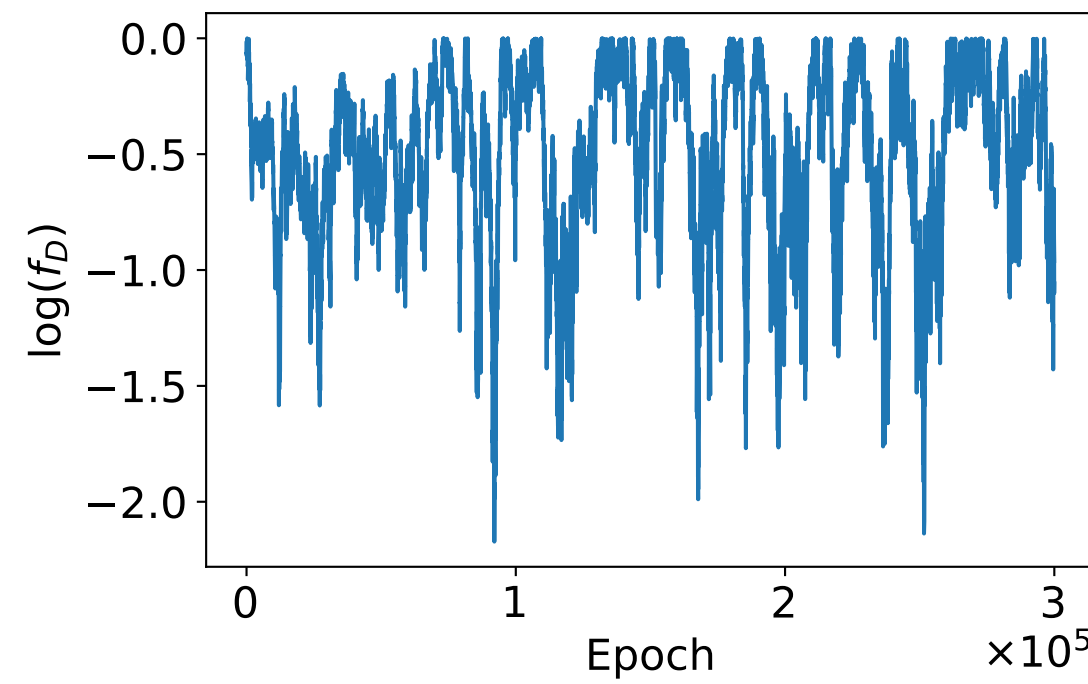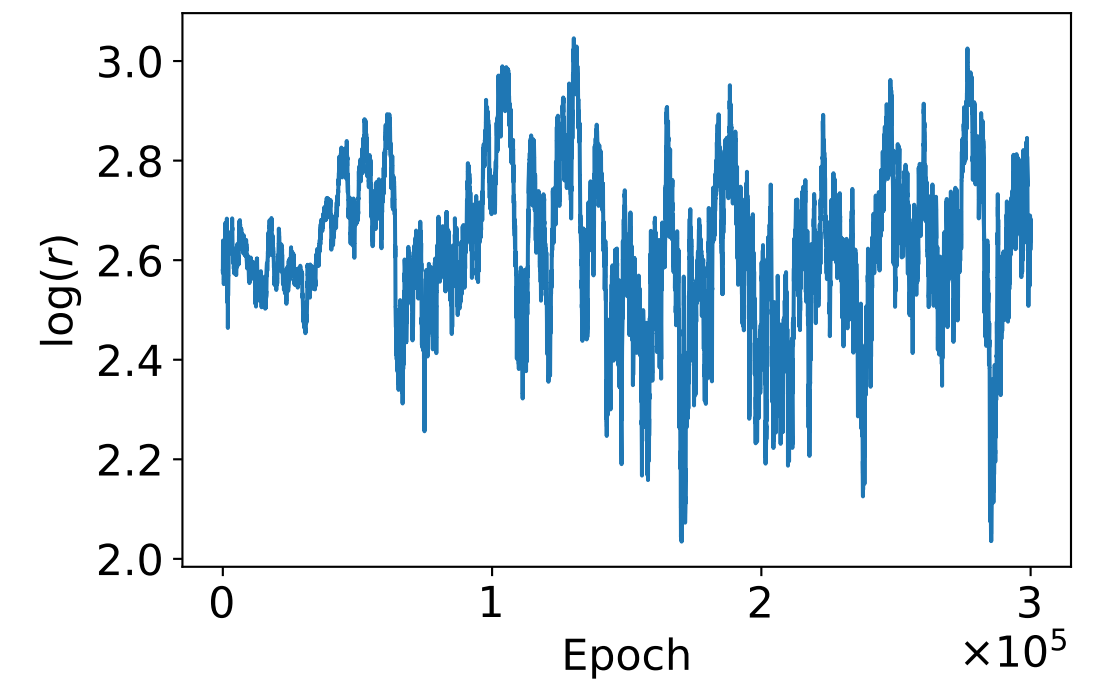



Colorado

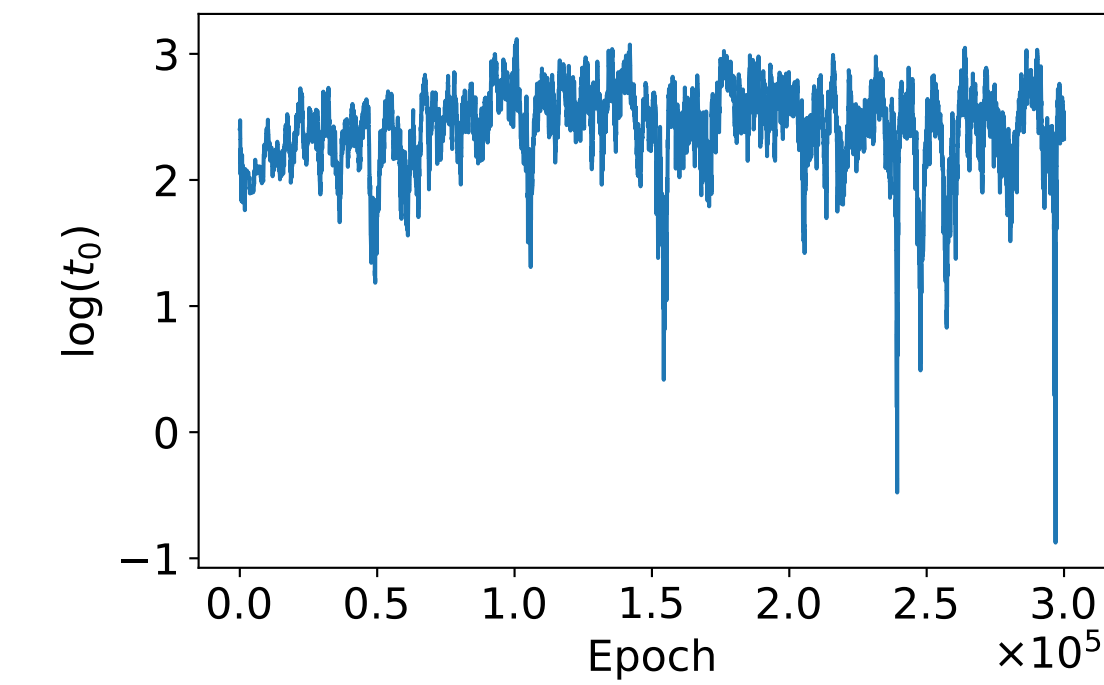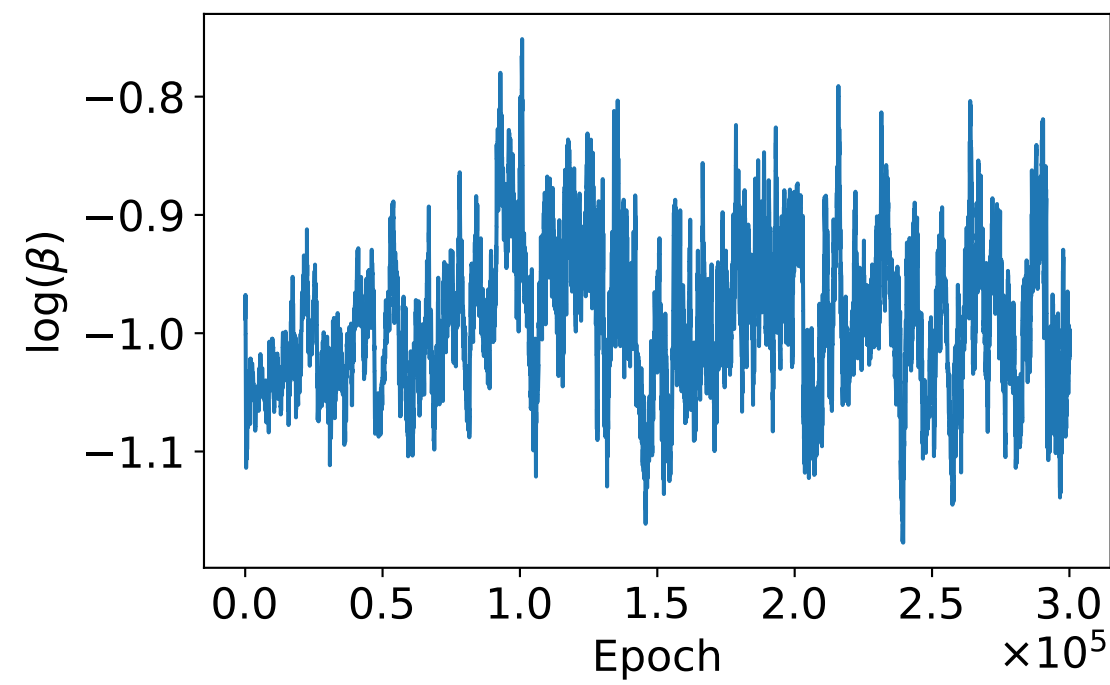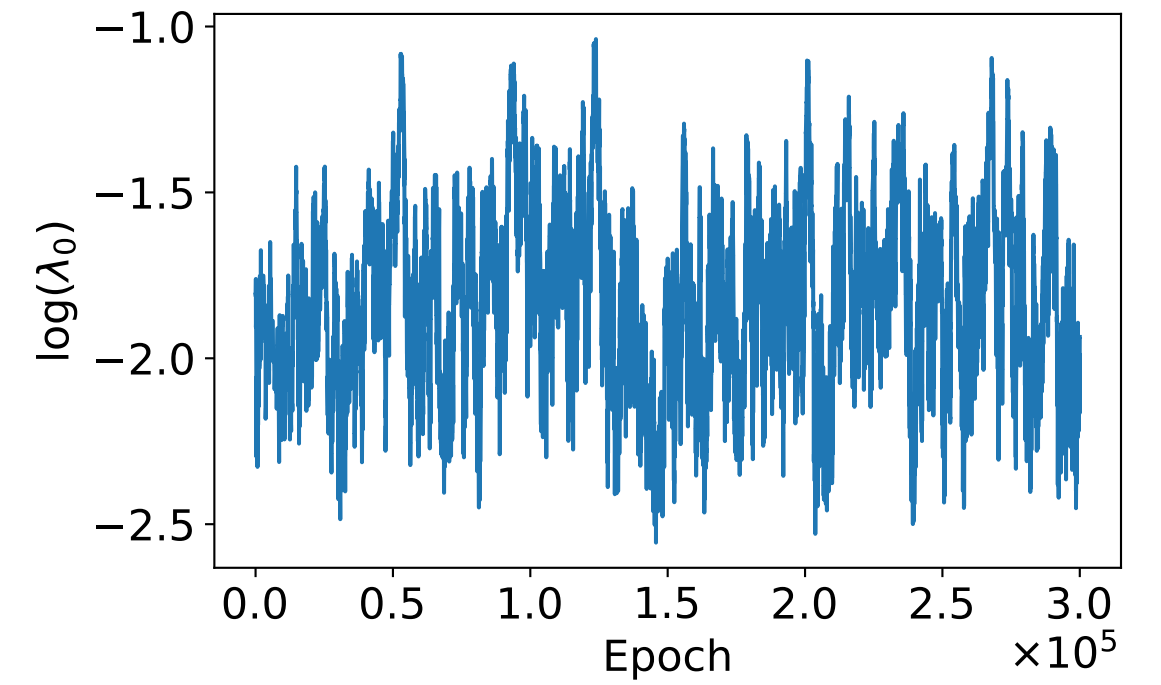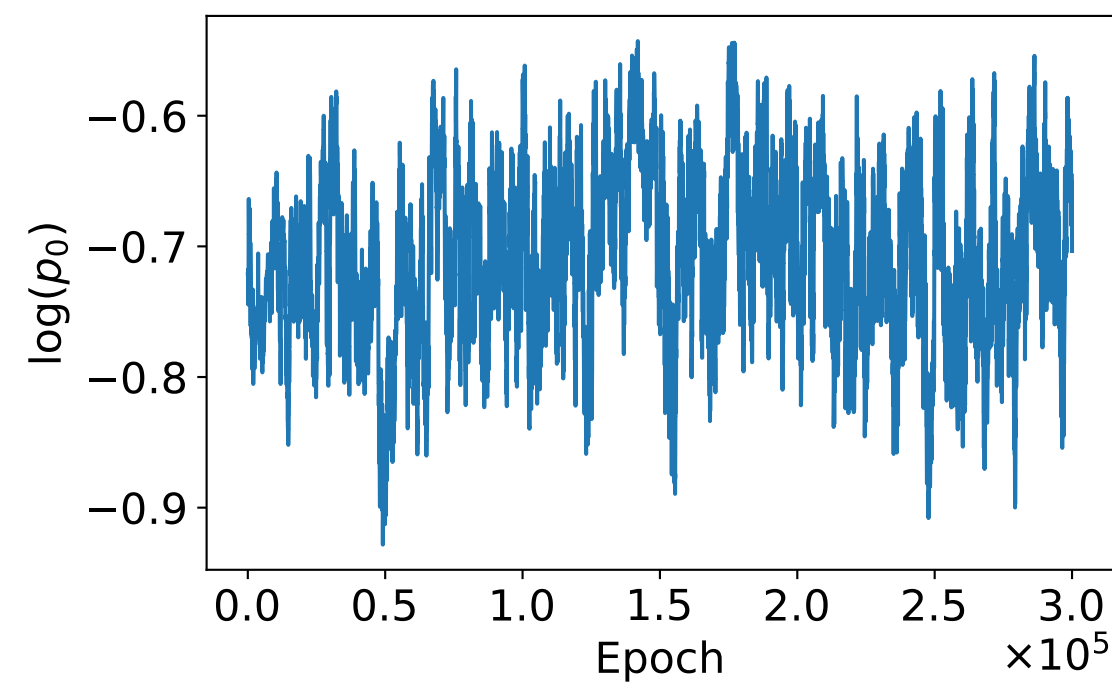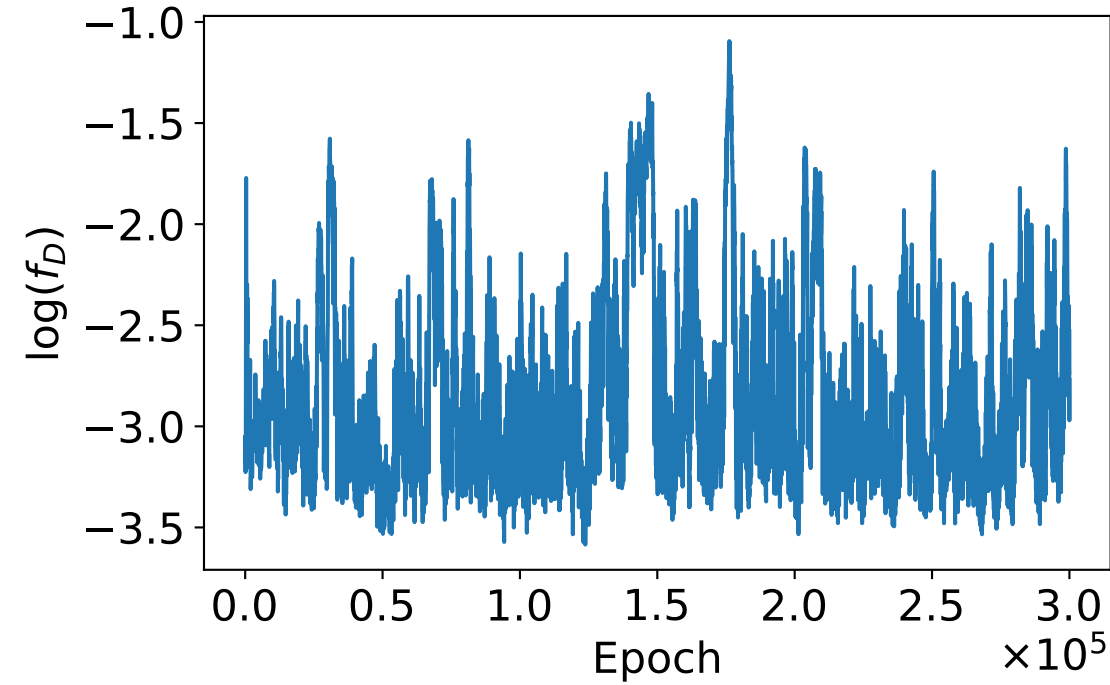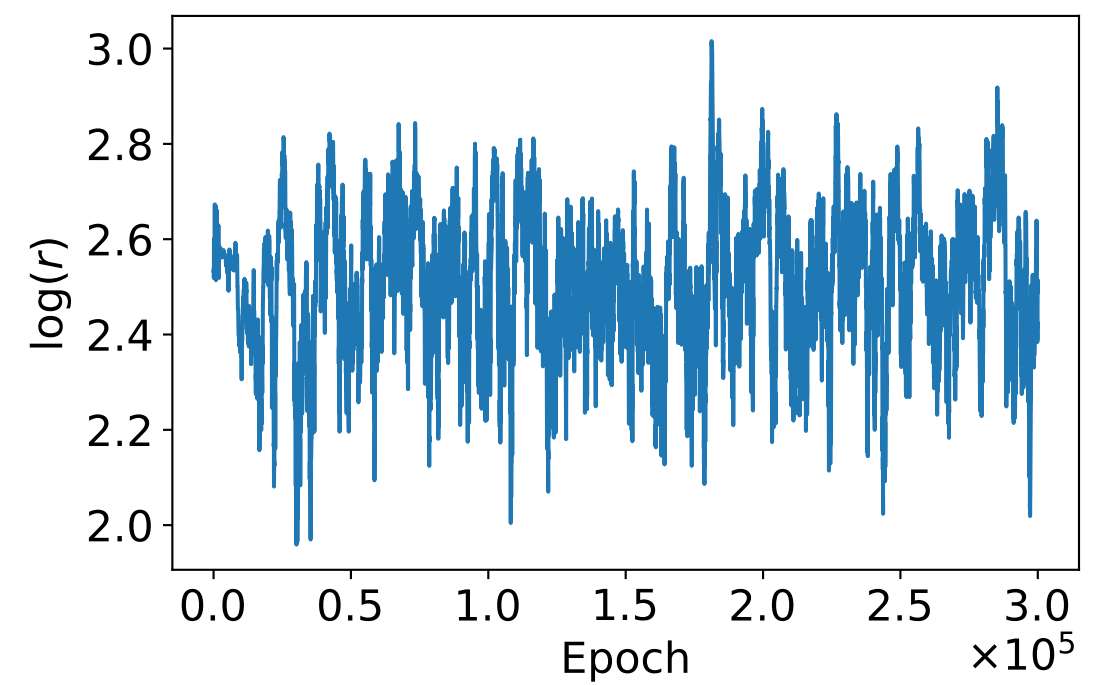

# Connecticut

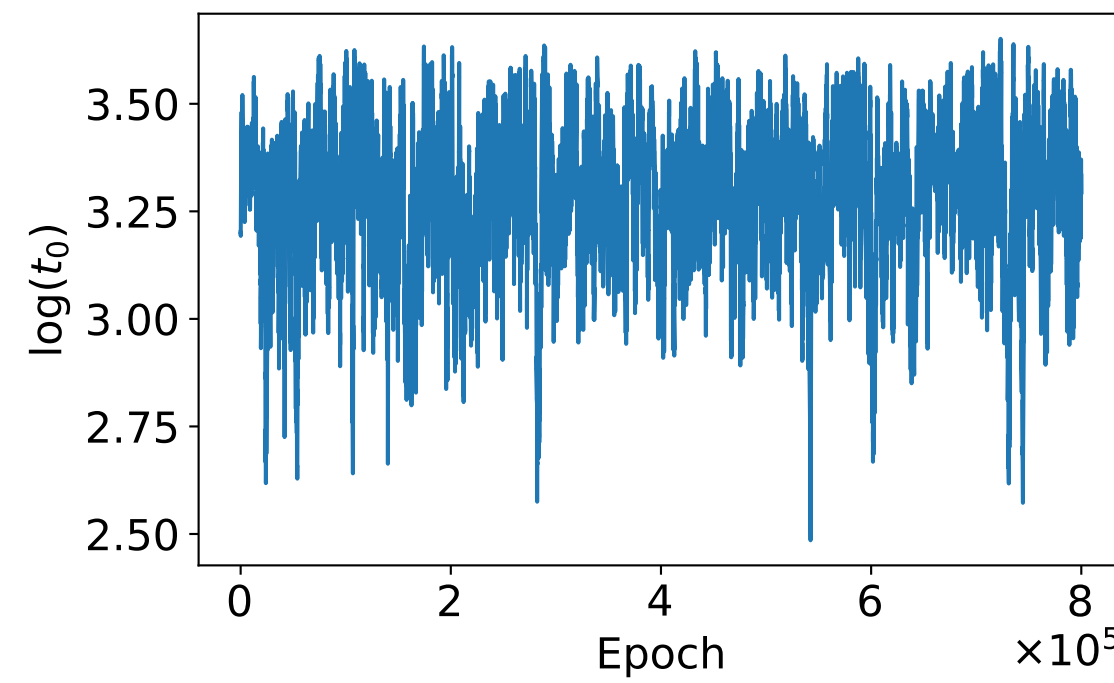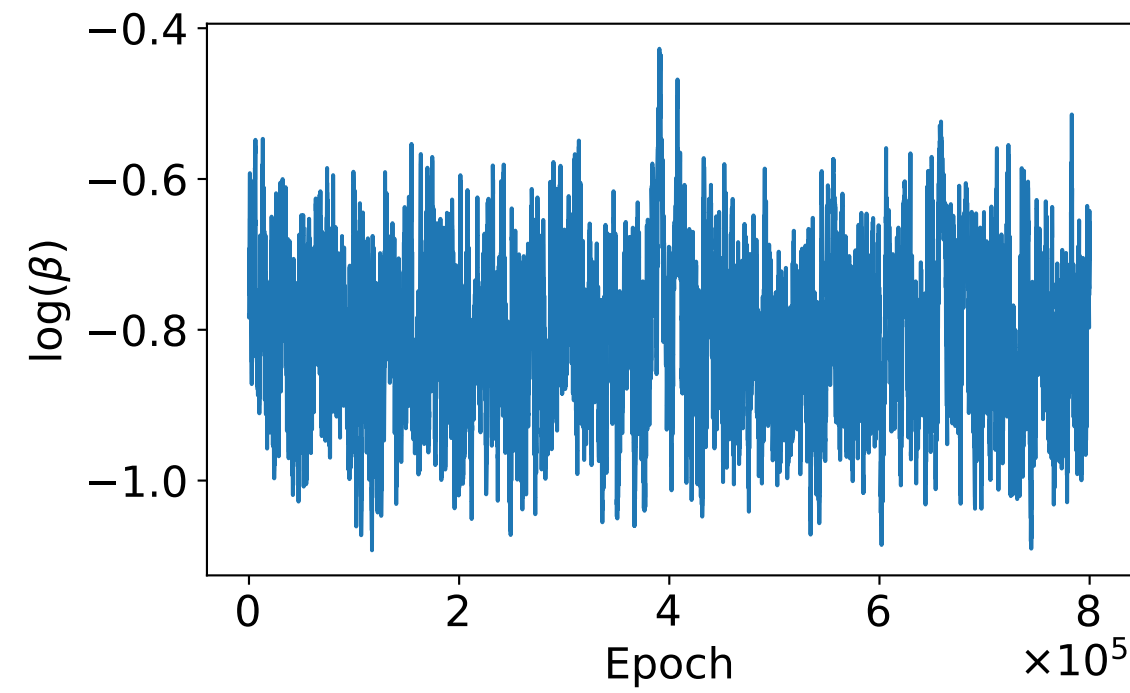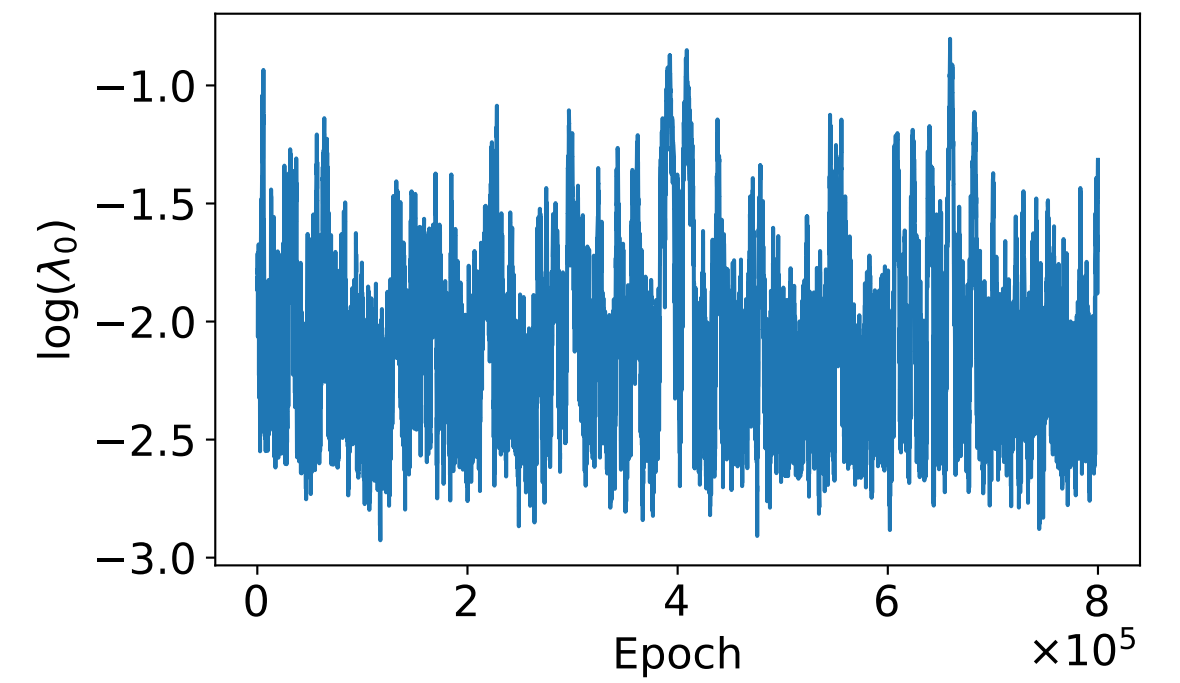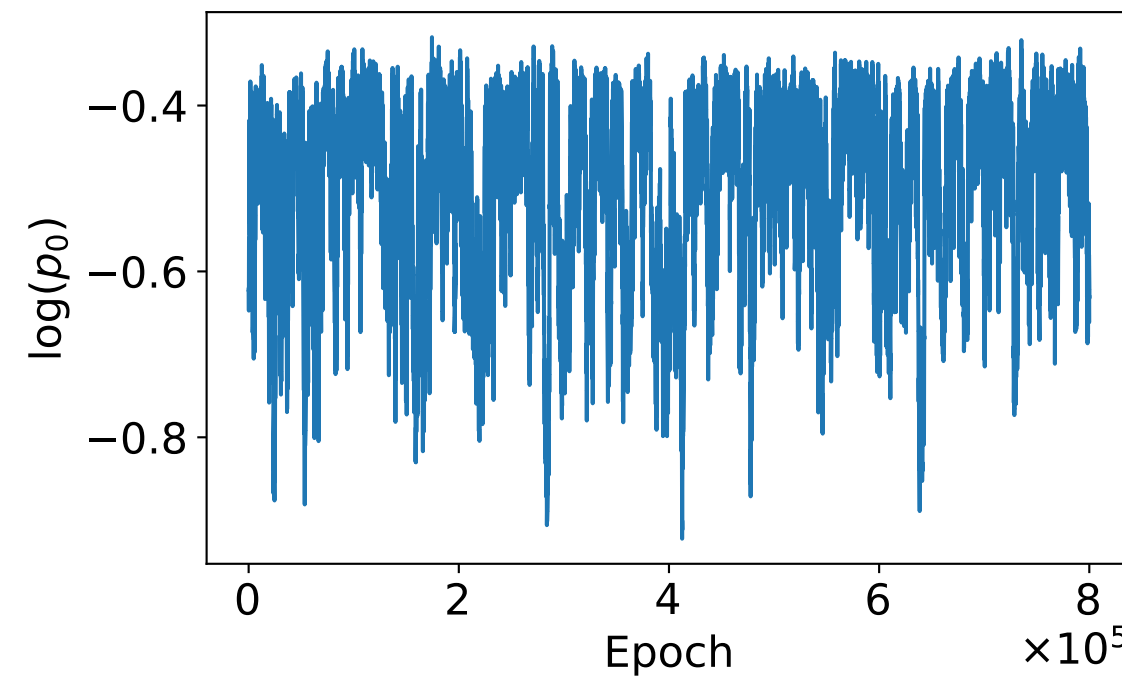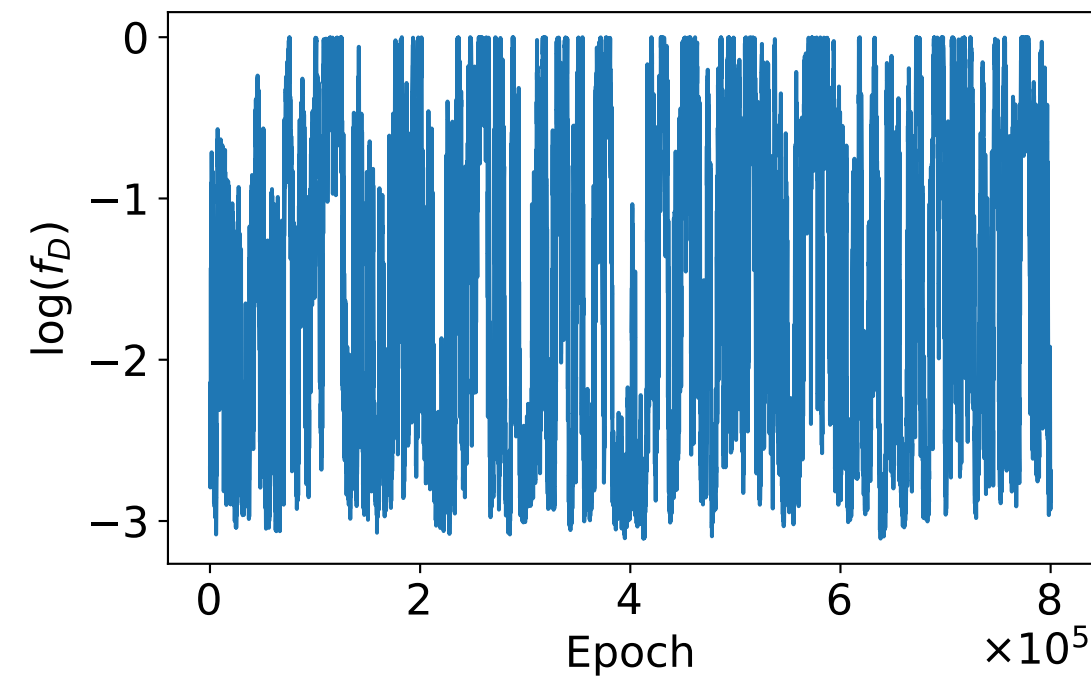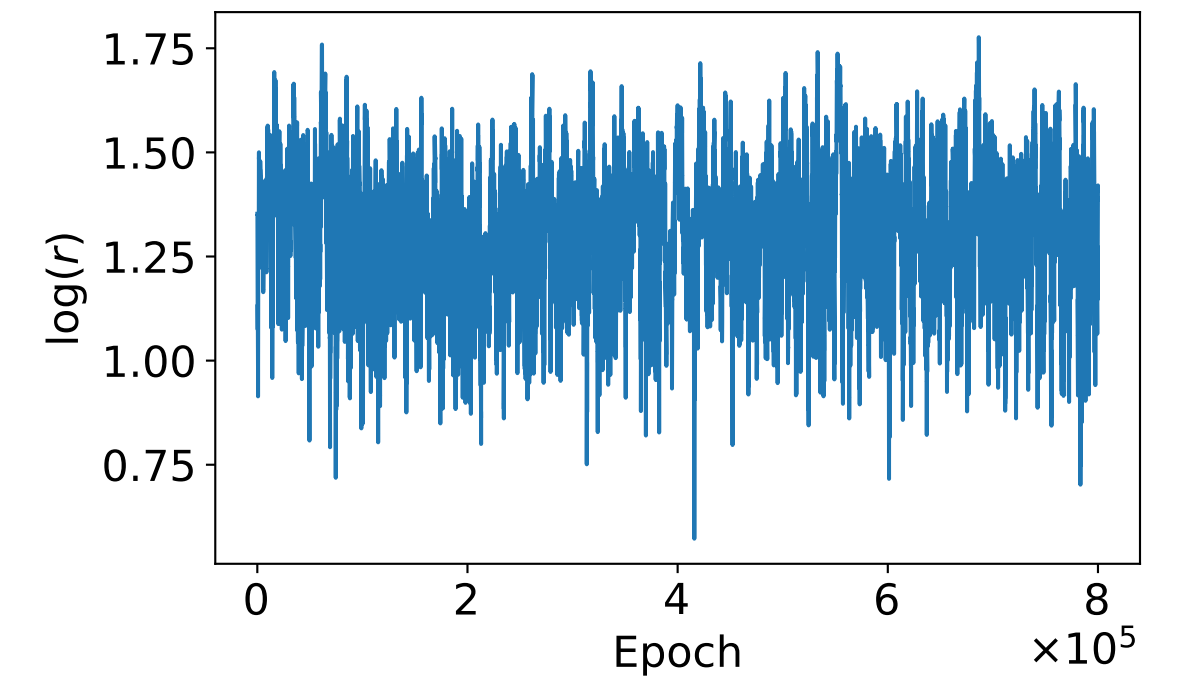

# Delaware

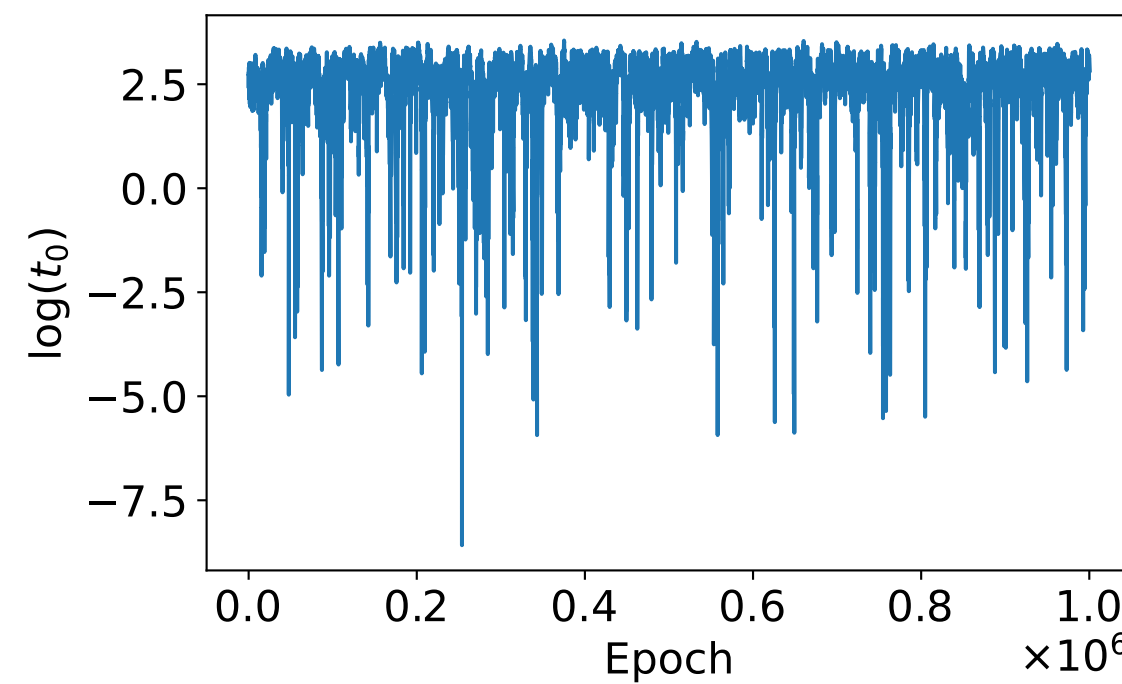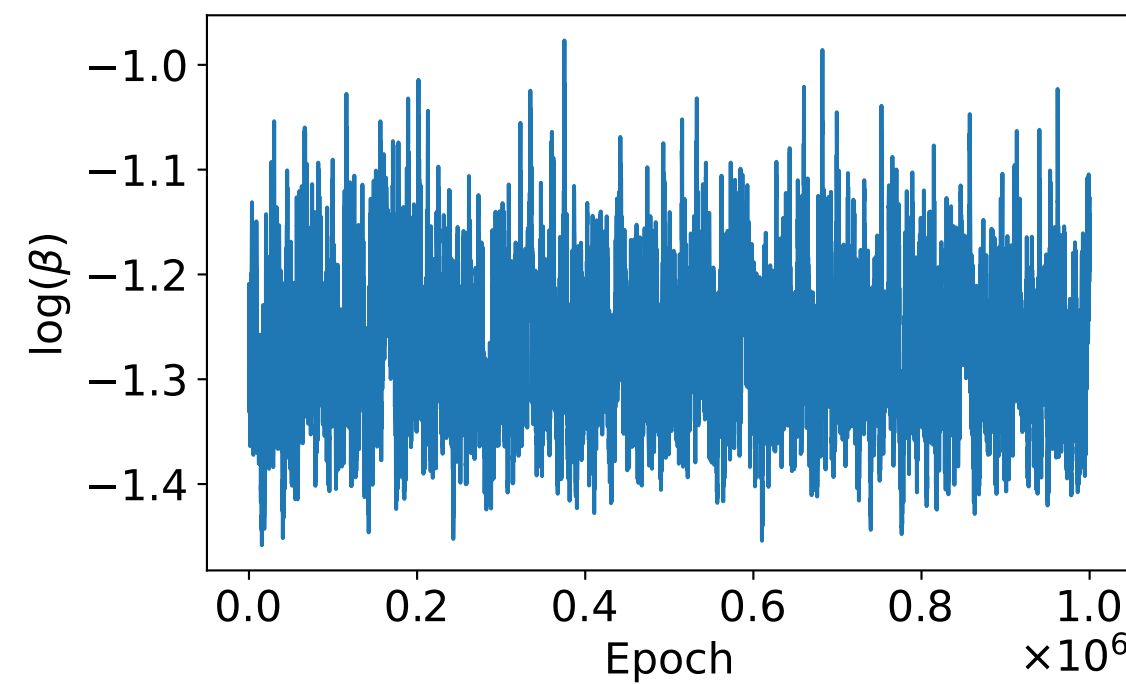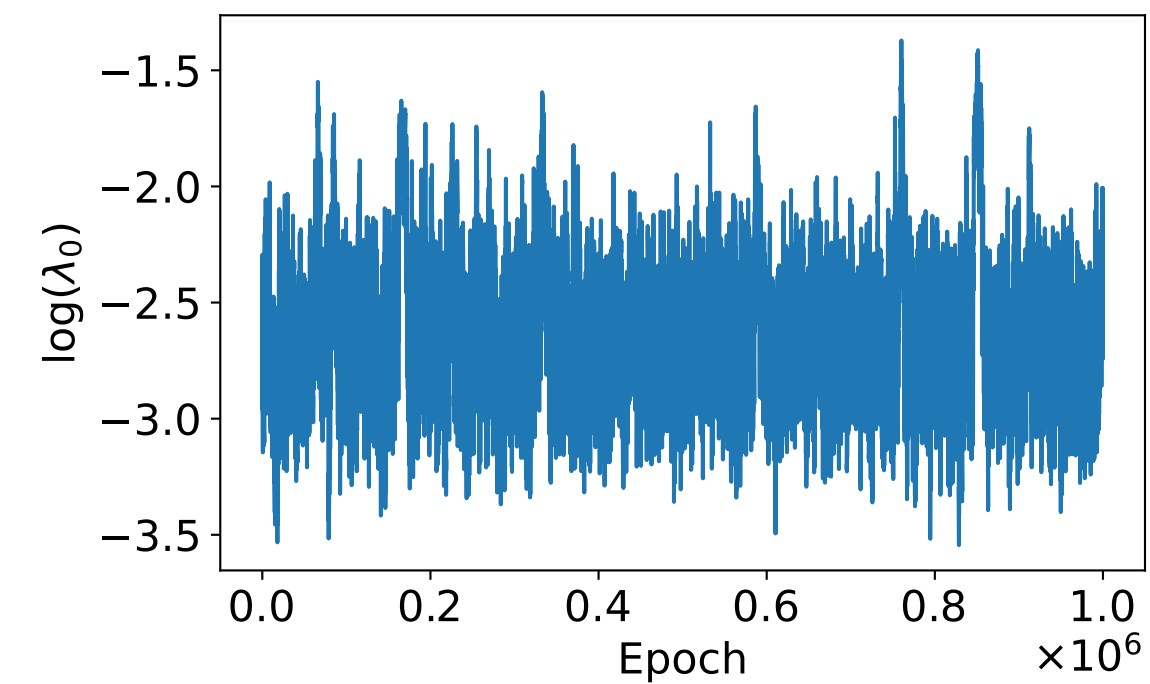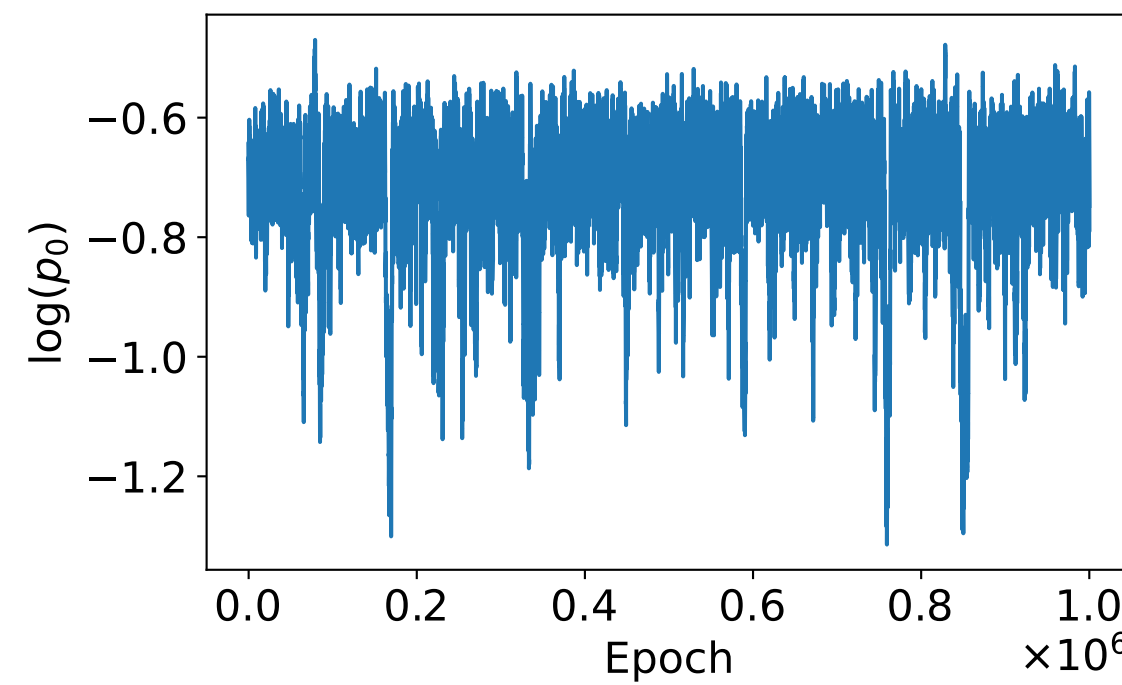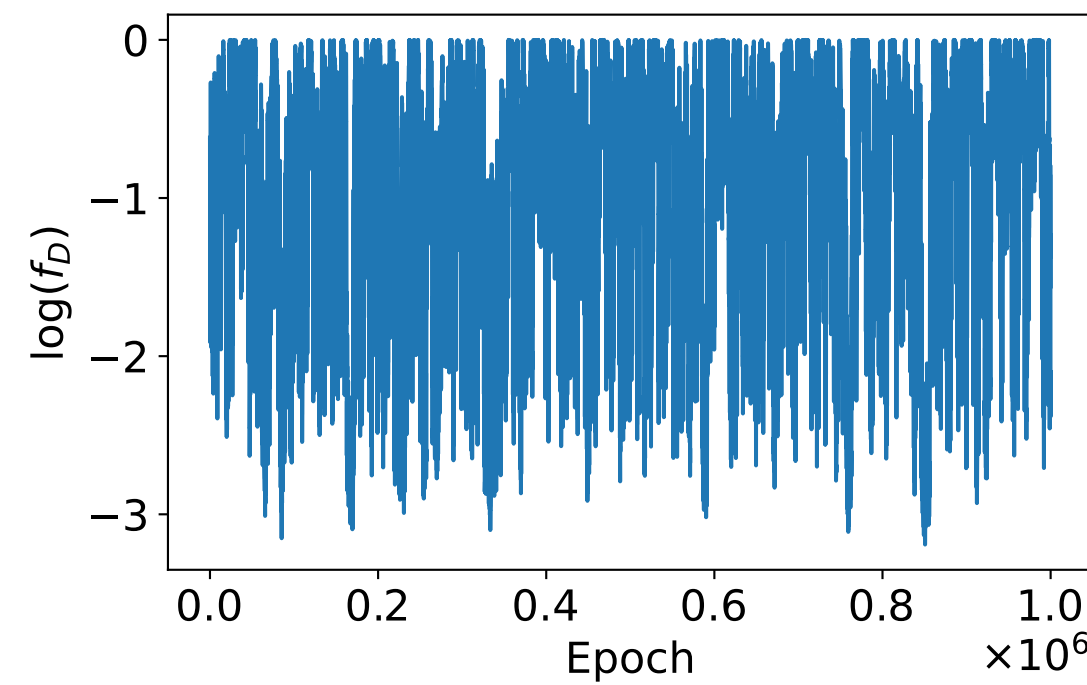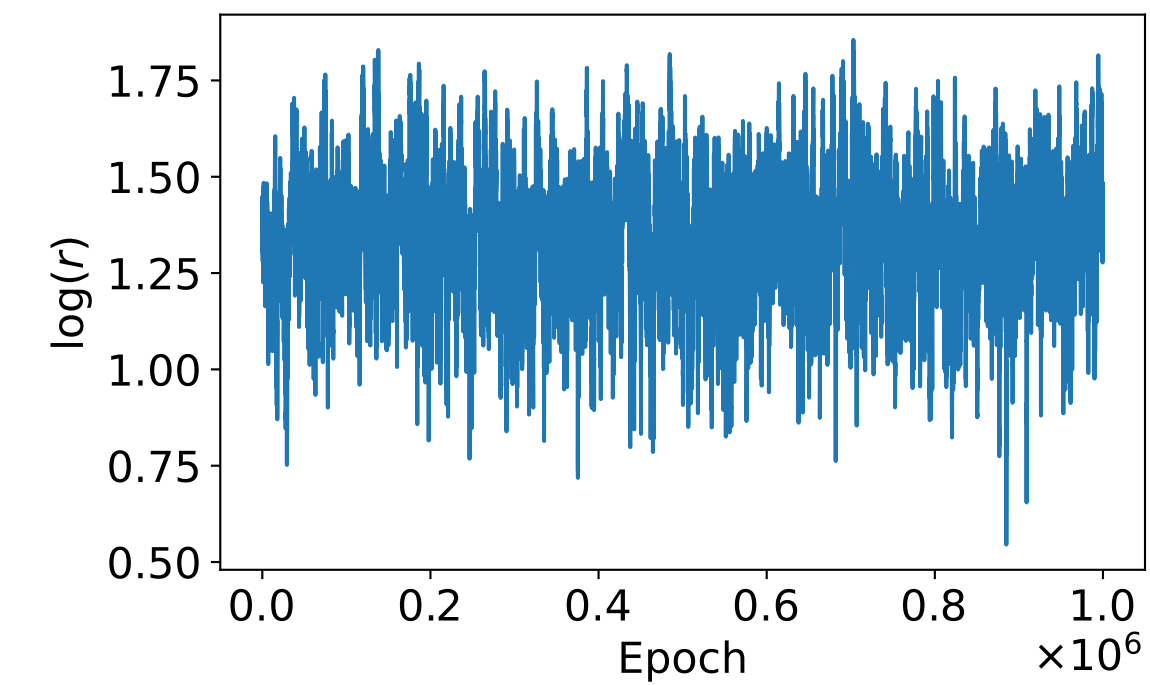

# Florida

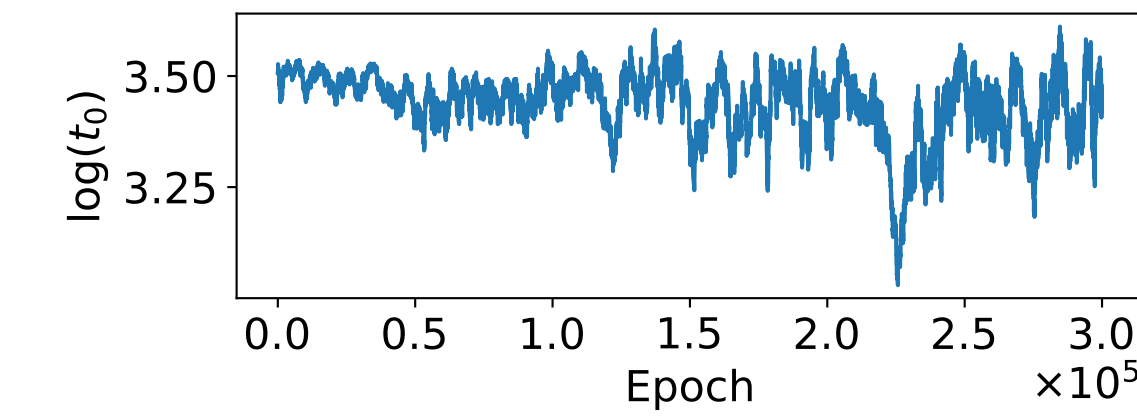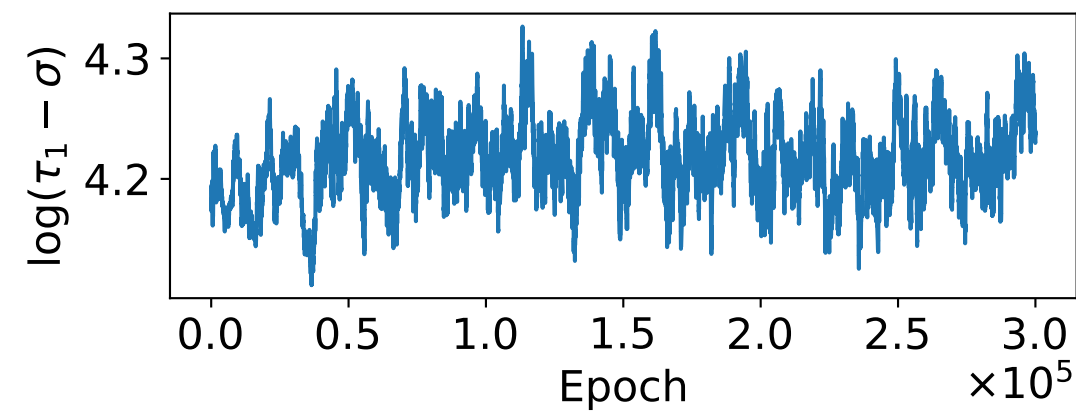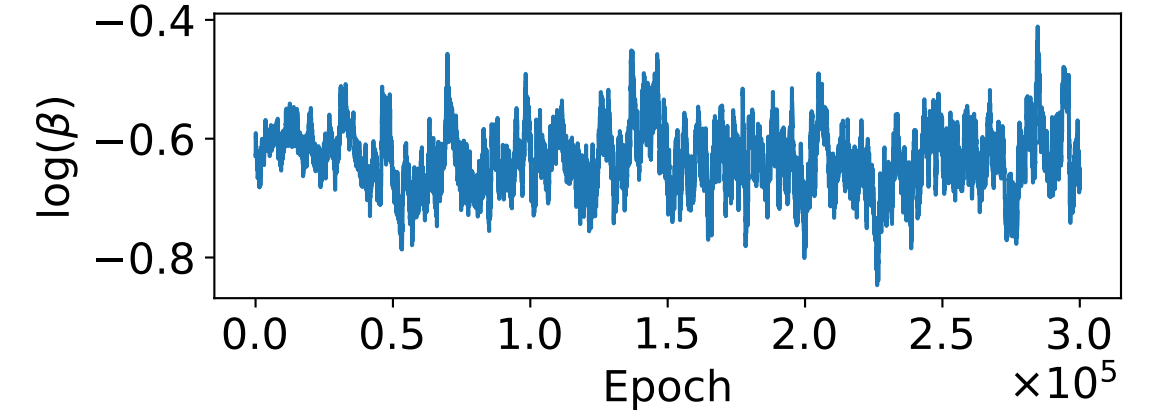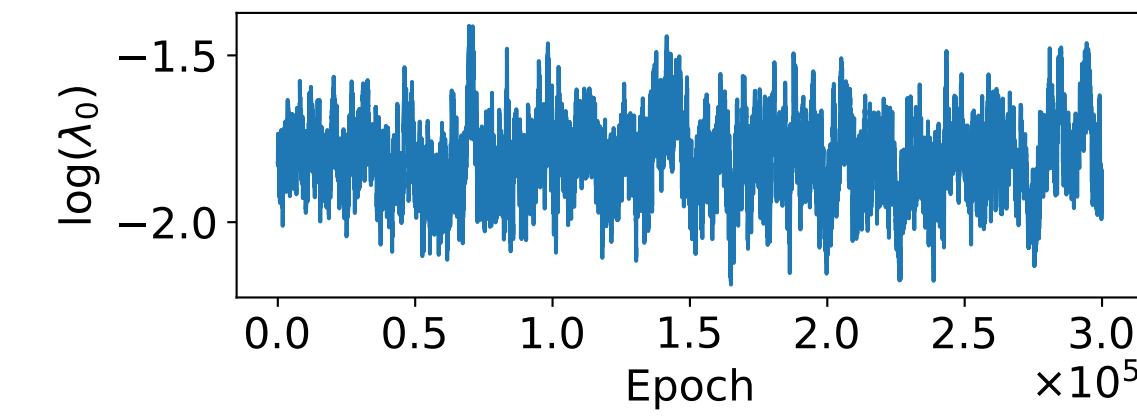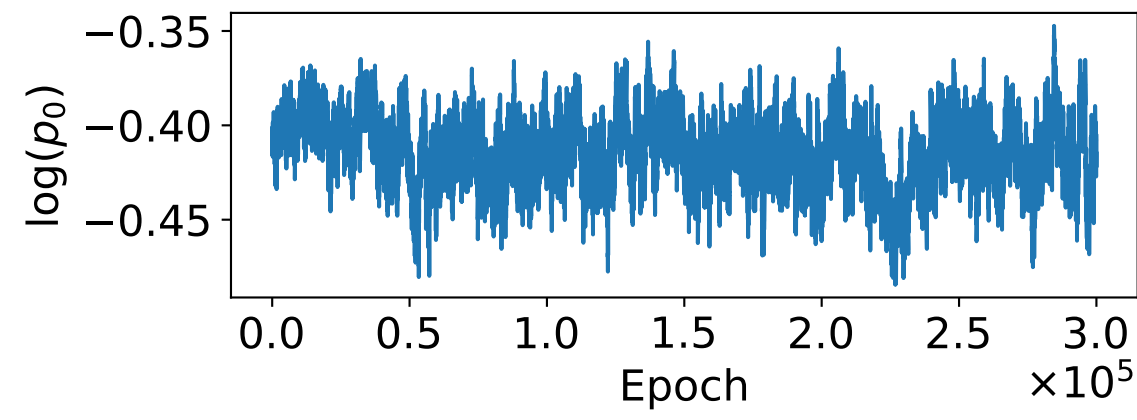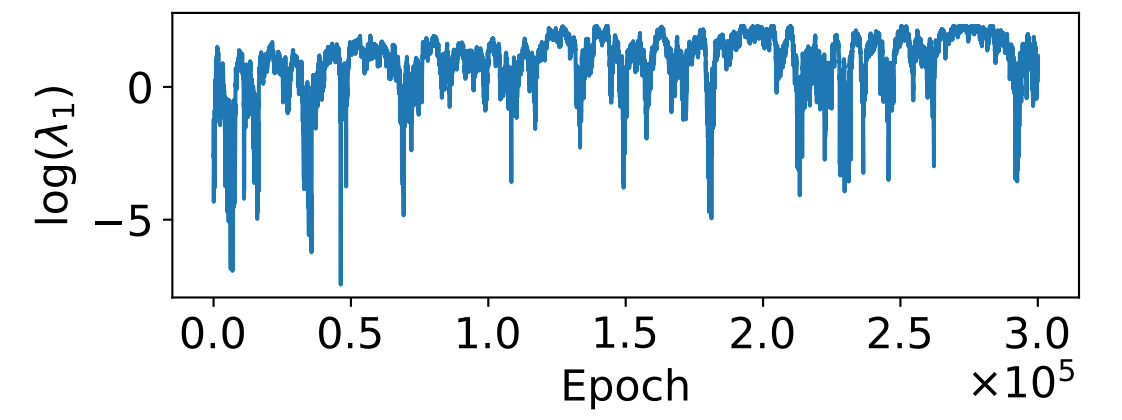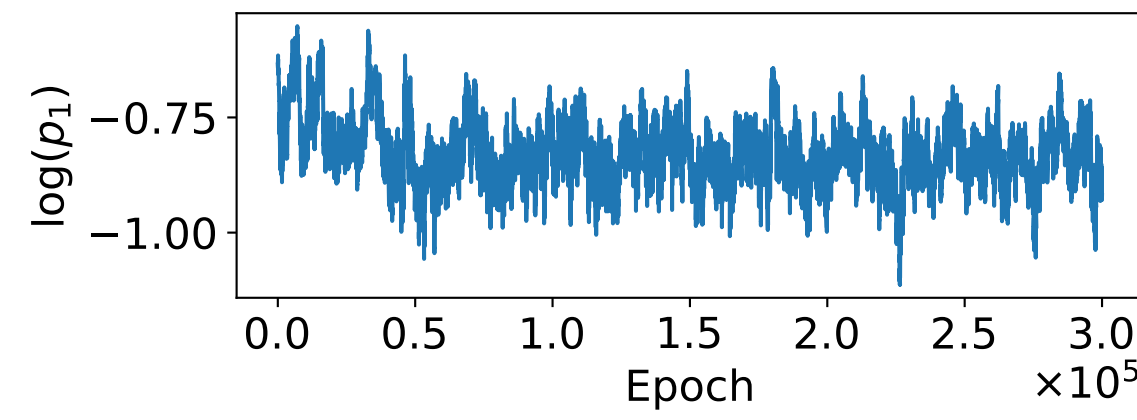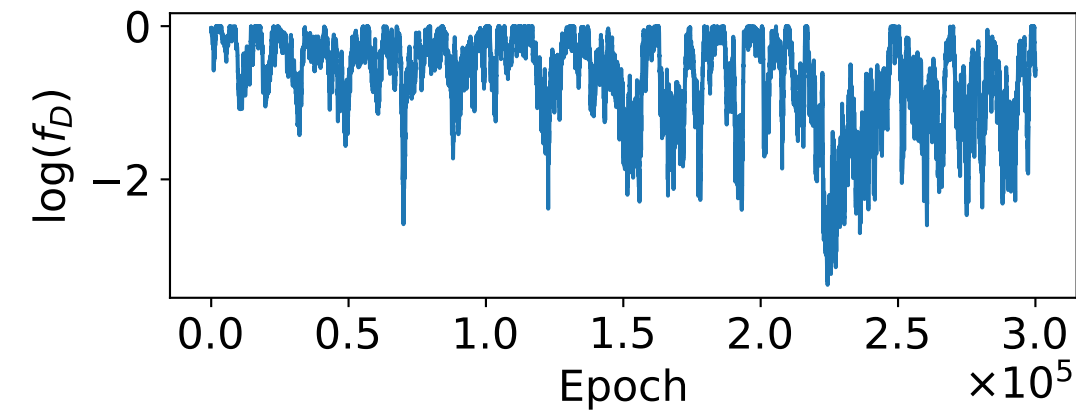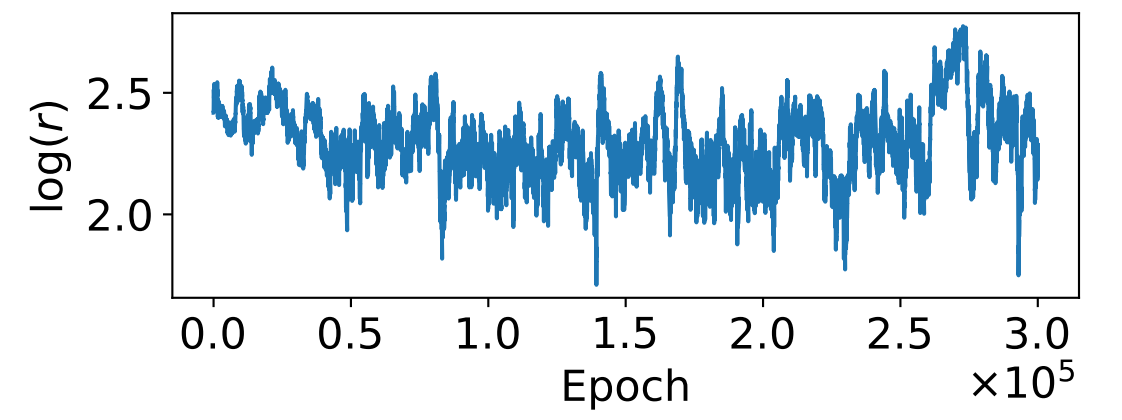

# Georgia

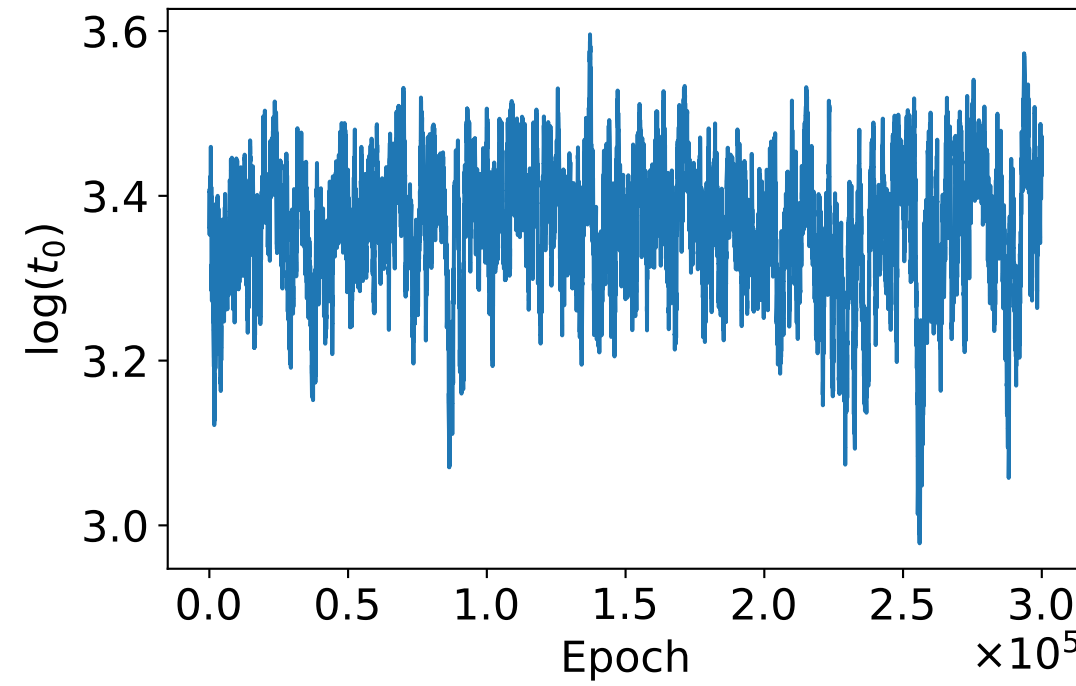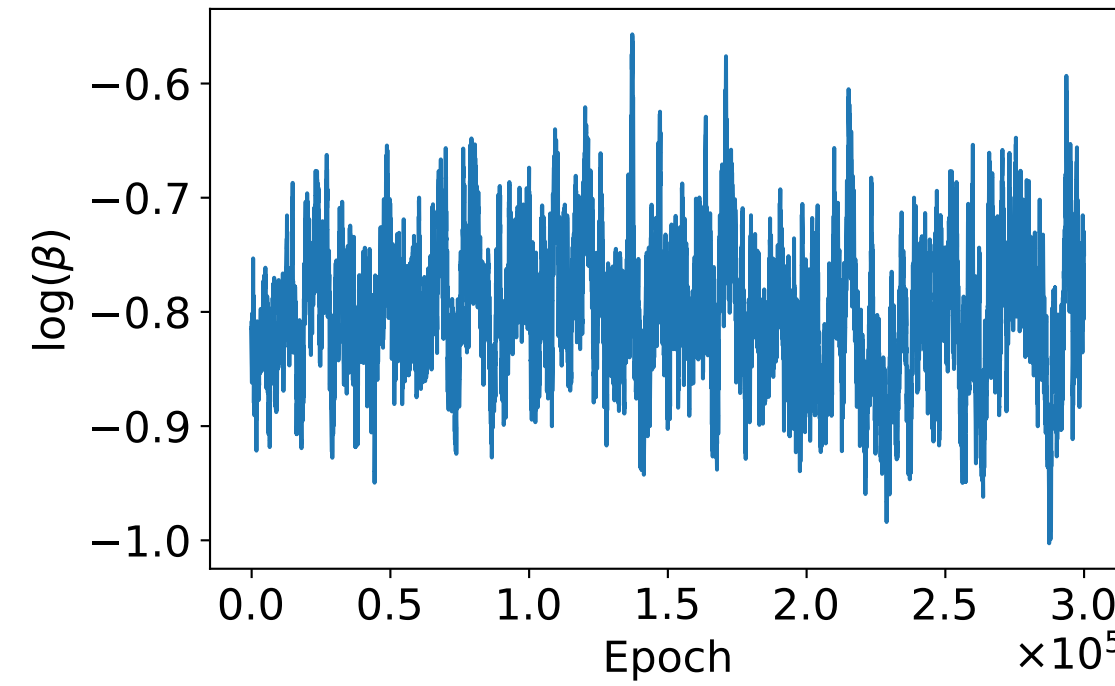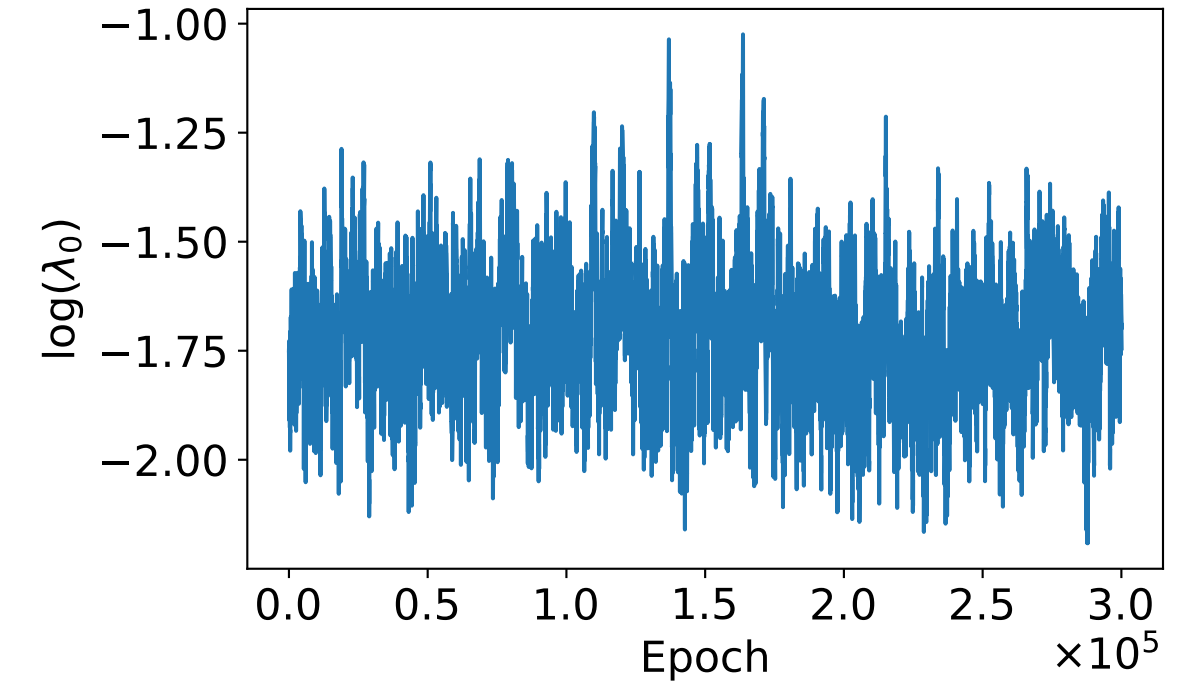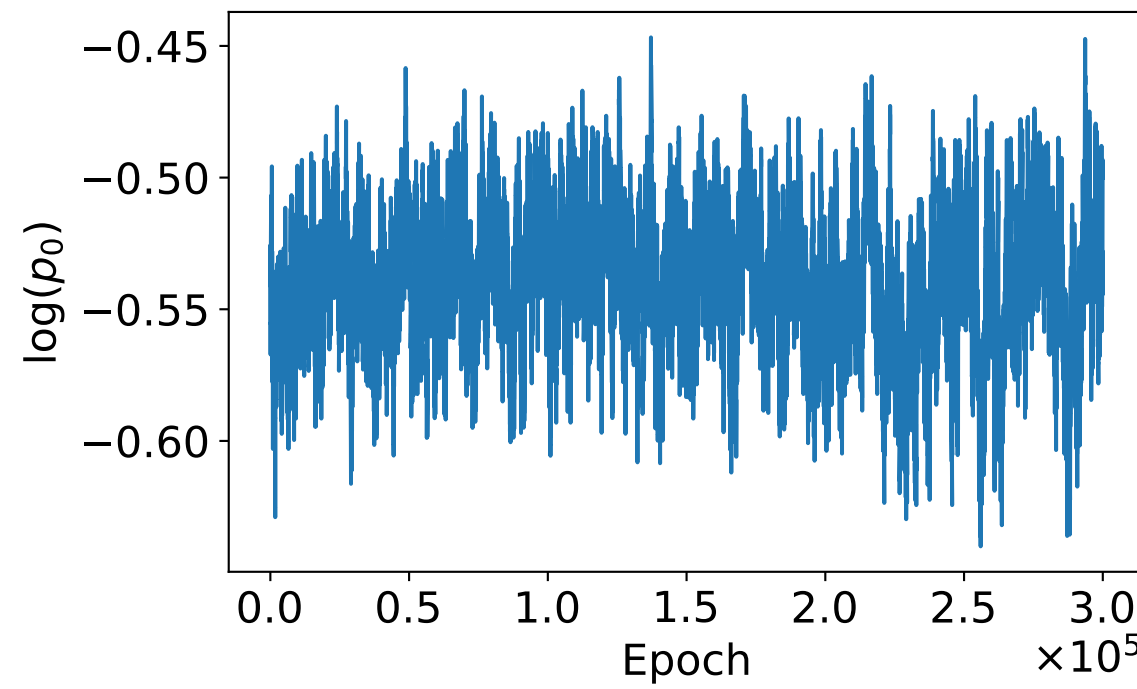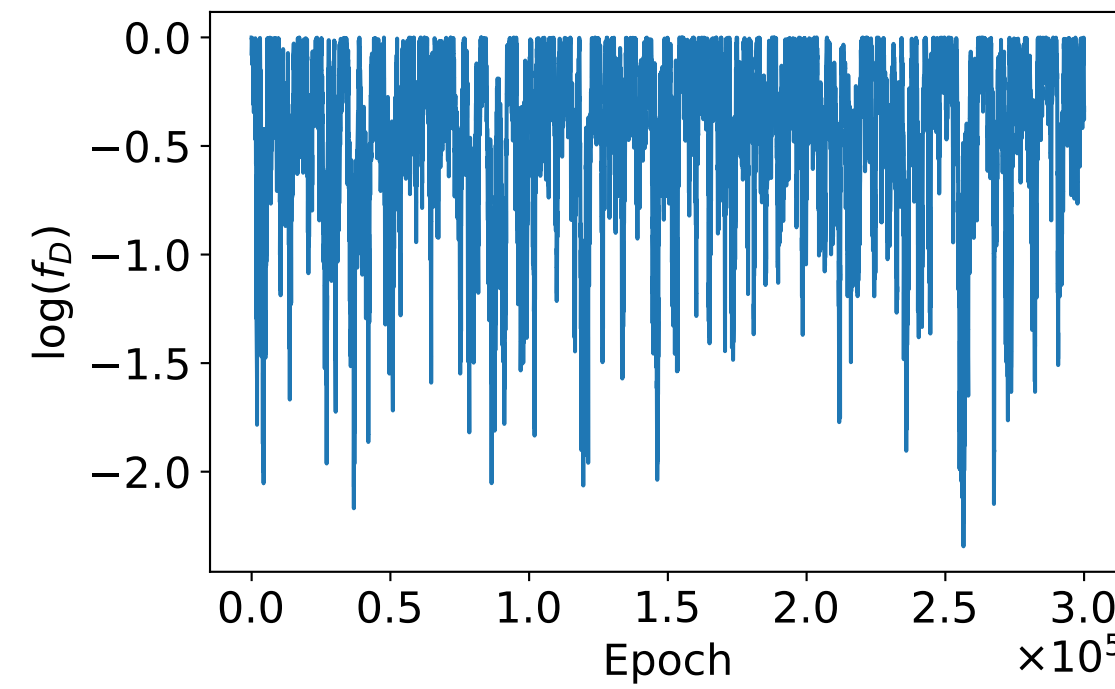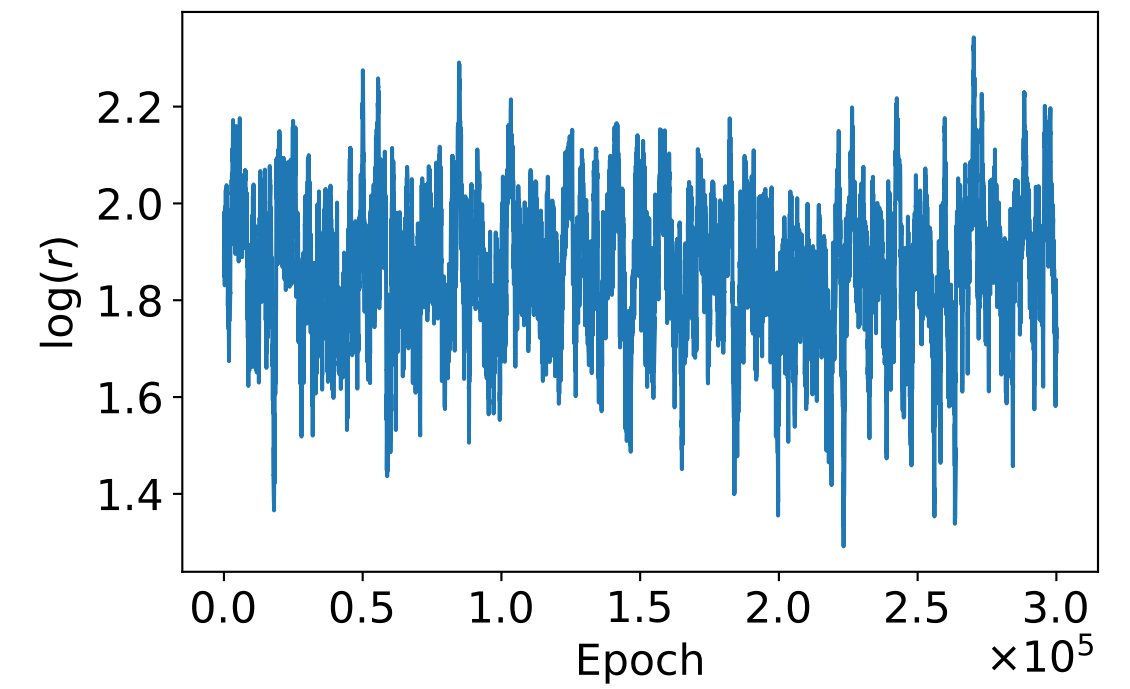

# Hawaii

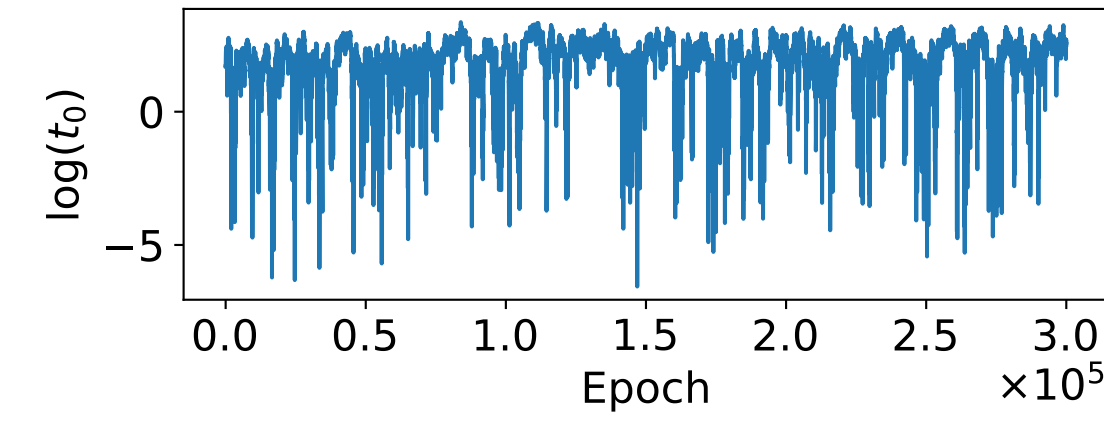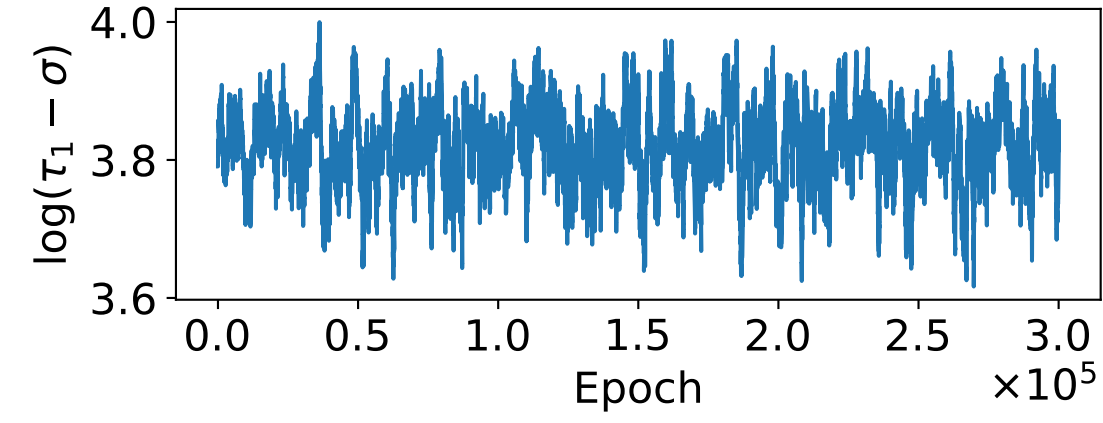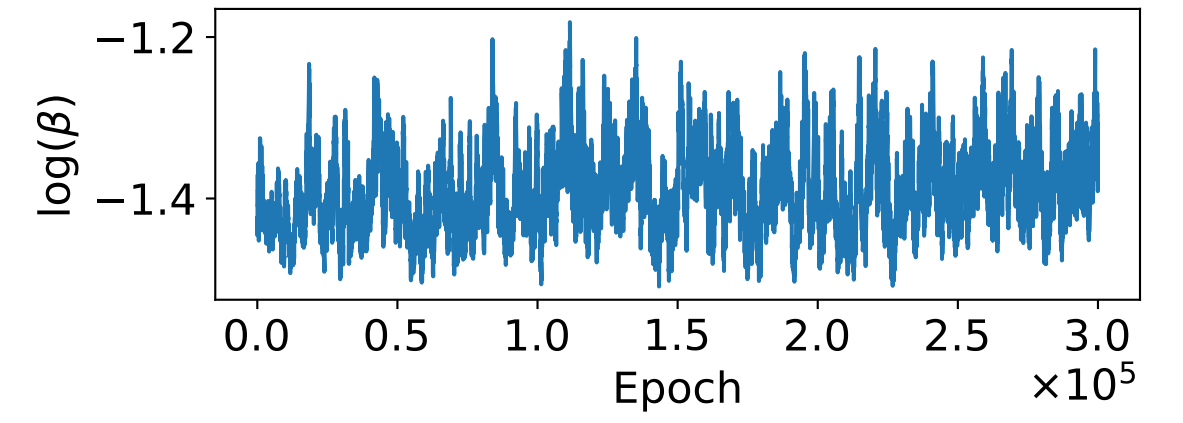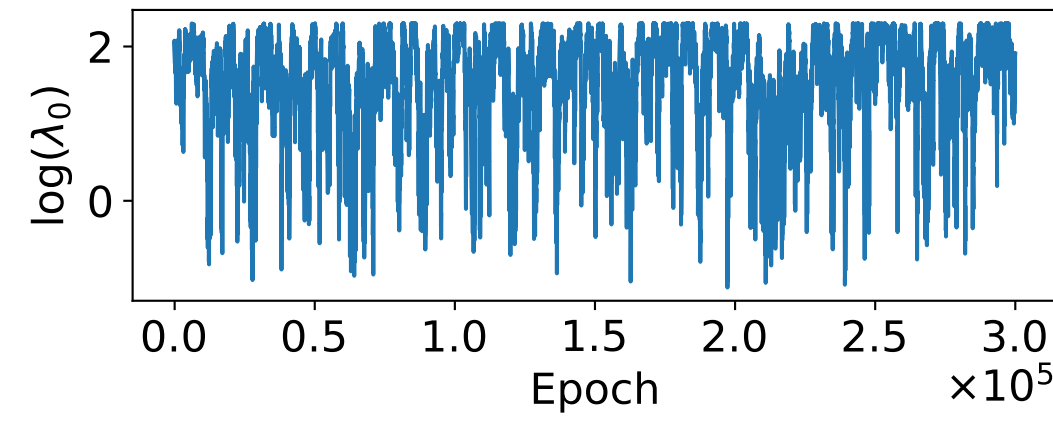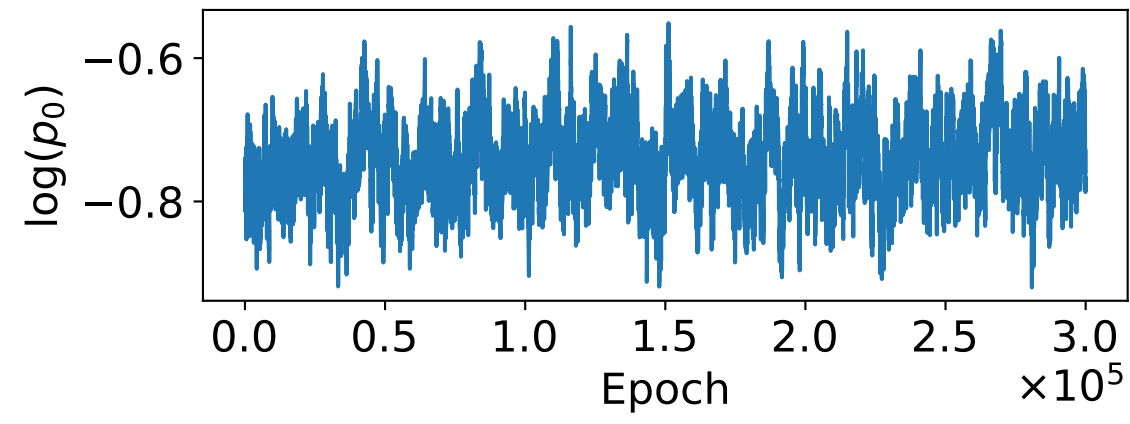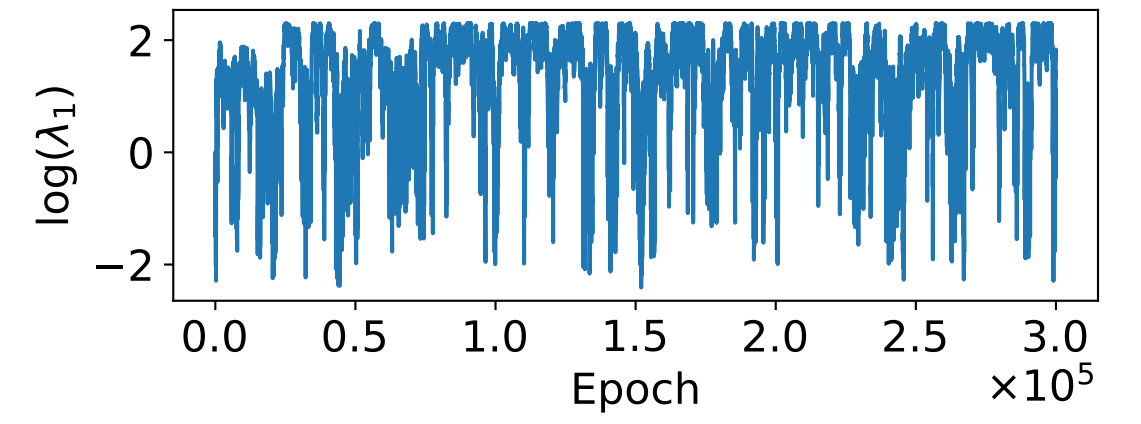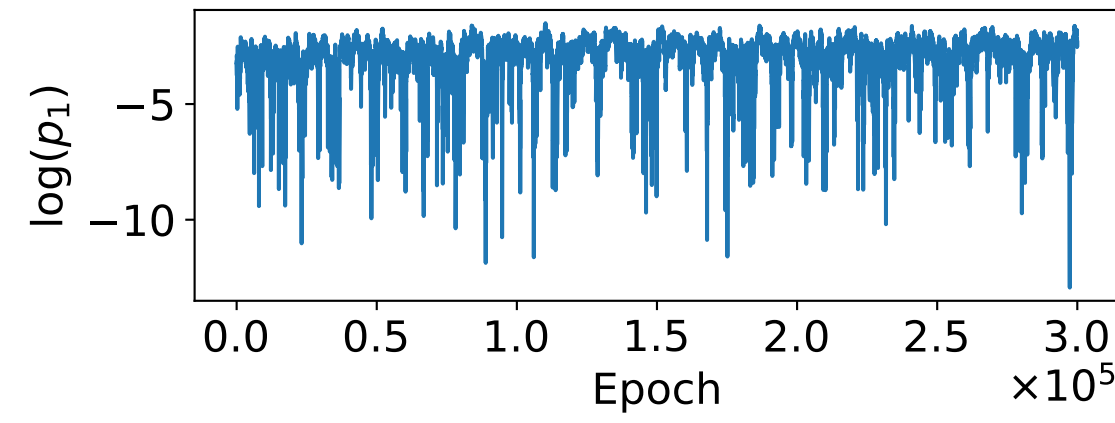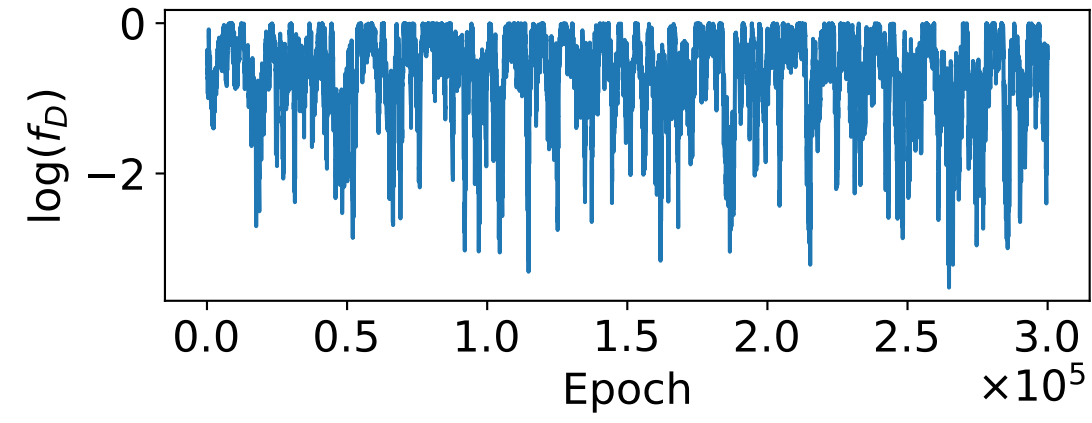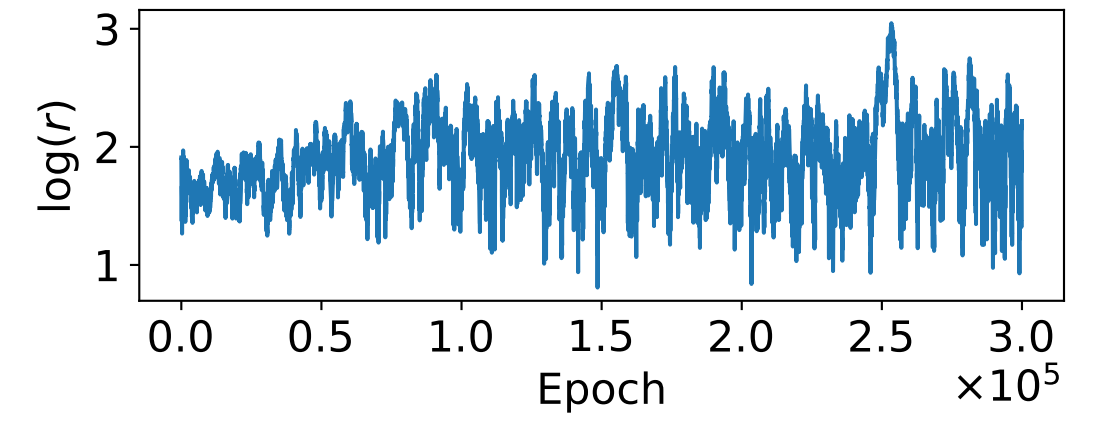

# Idaho

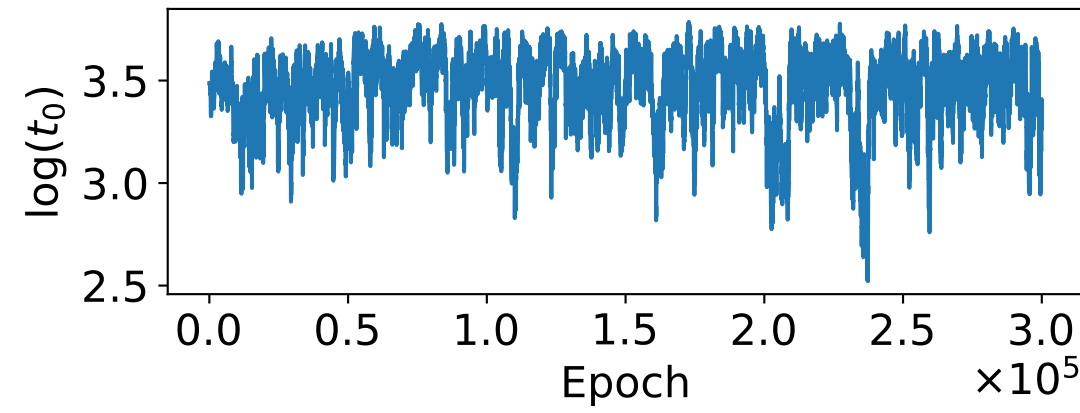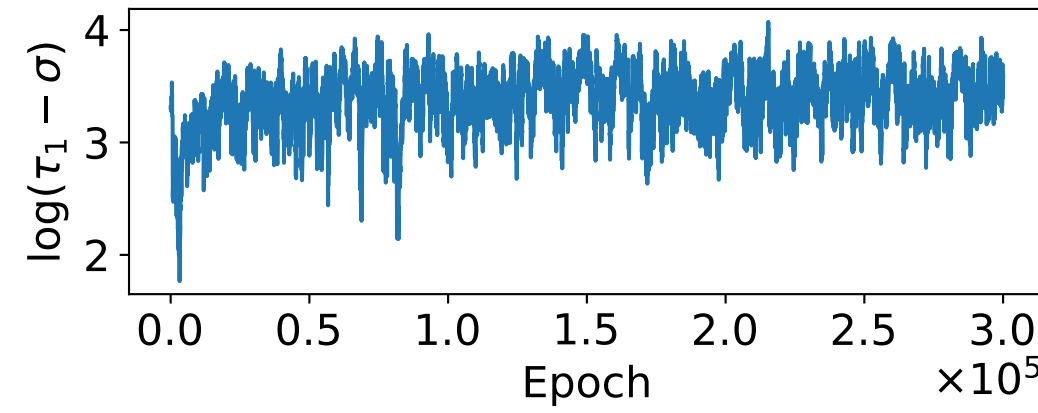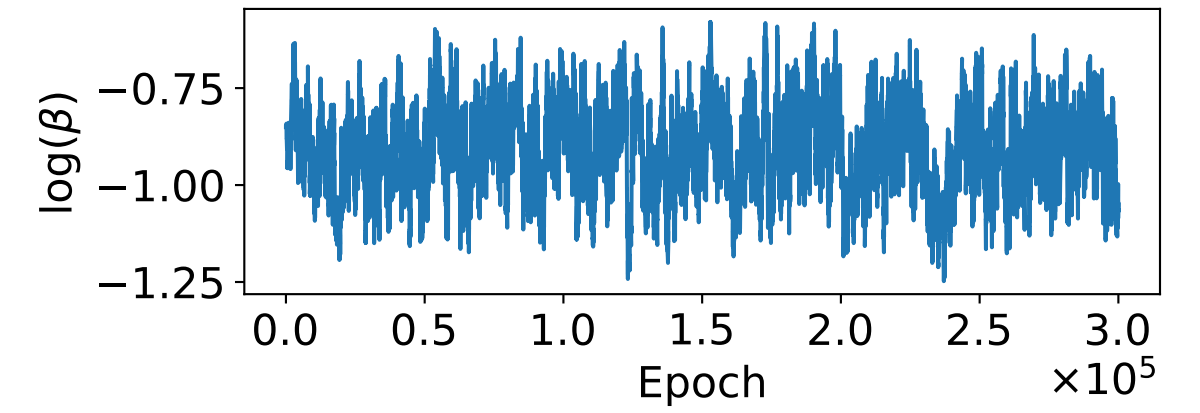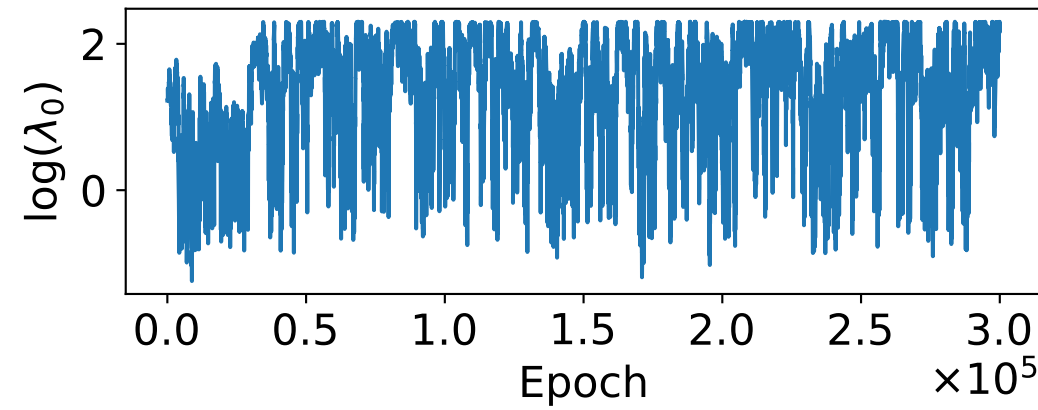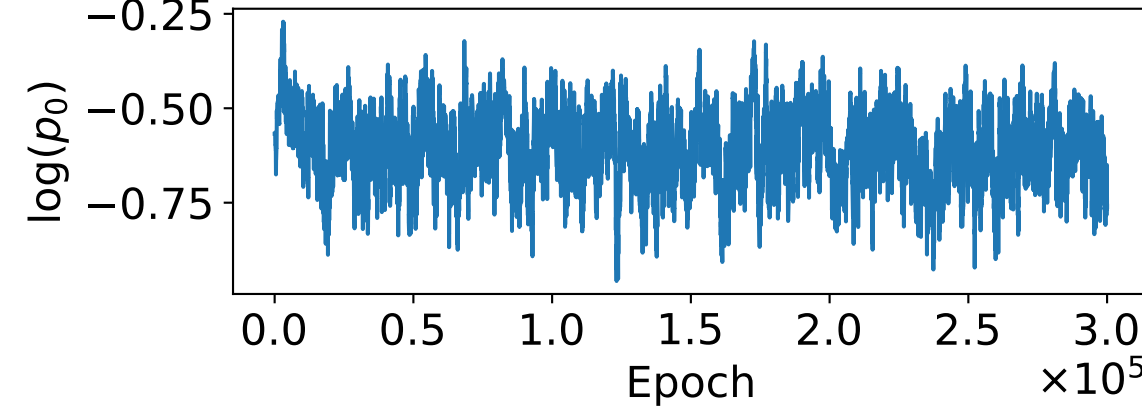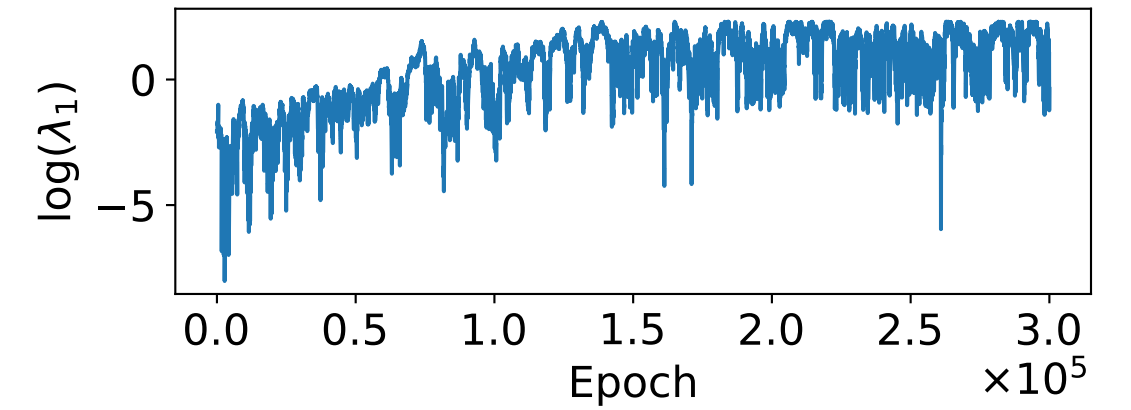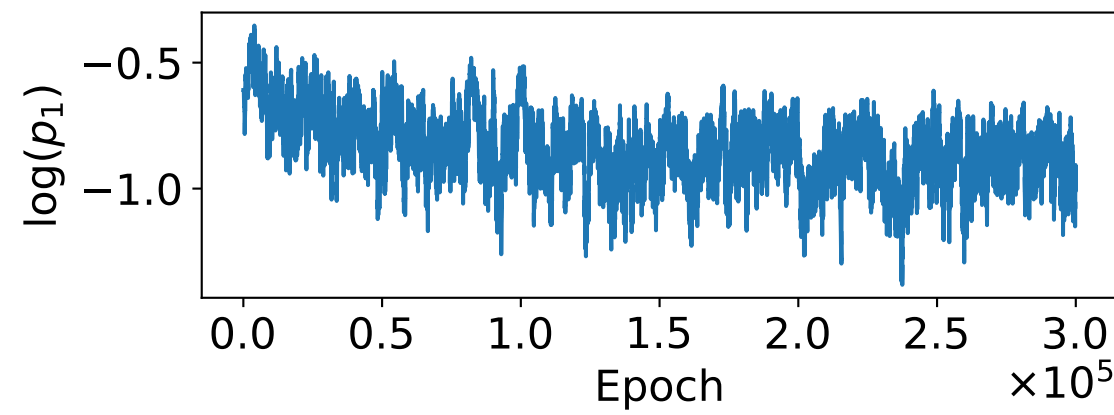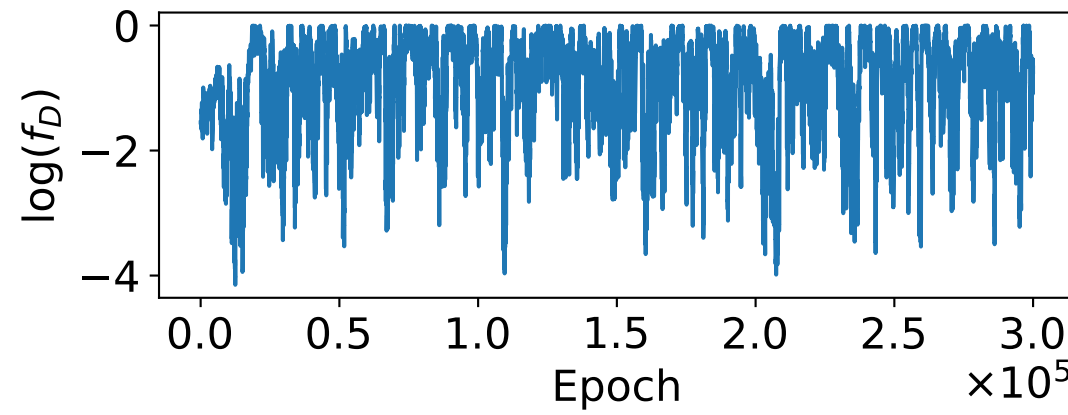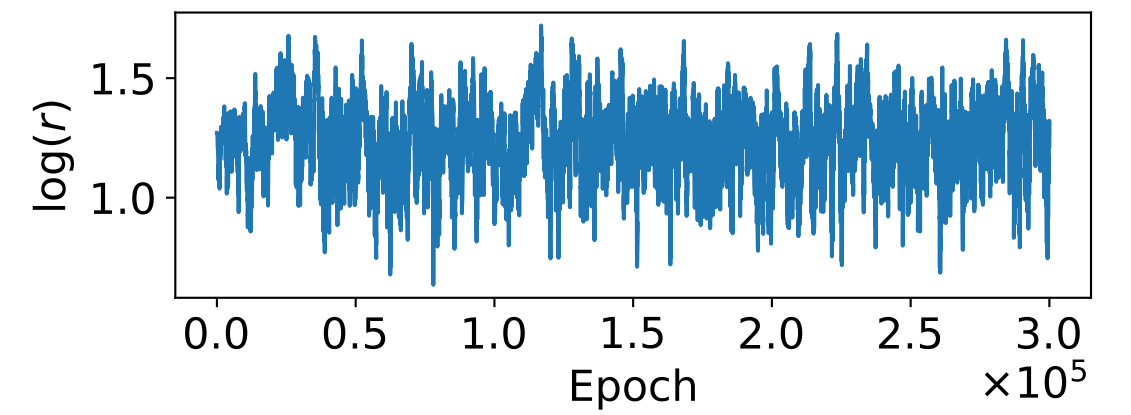

# Illinois

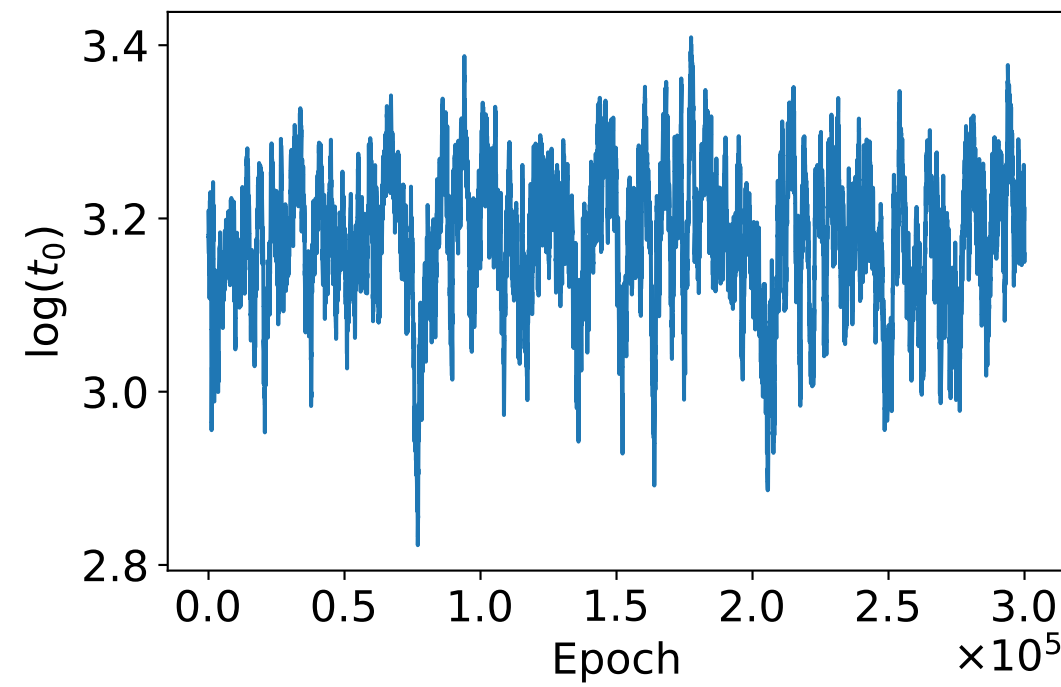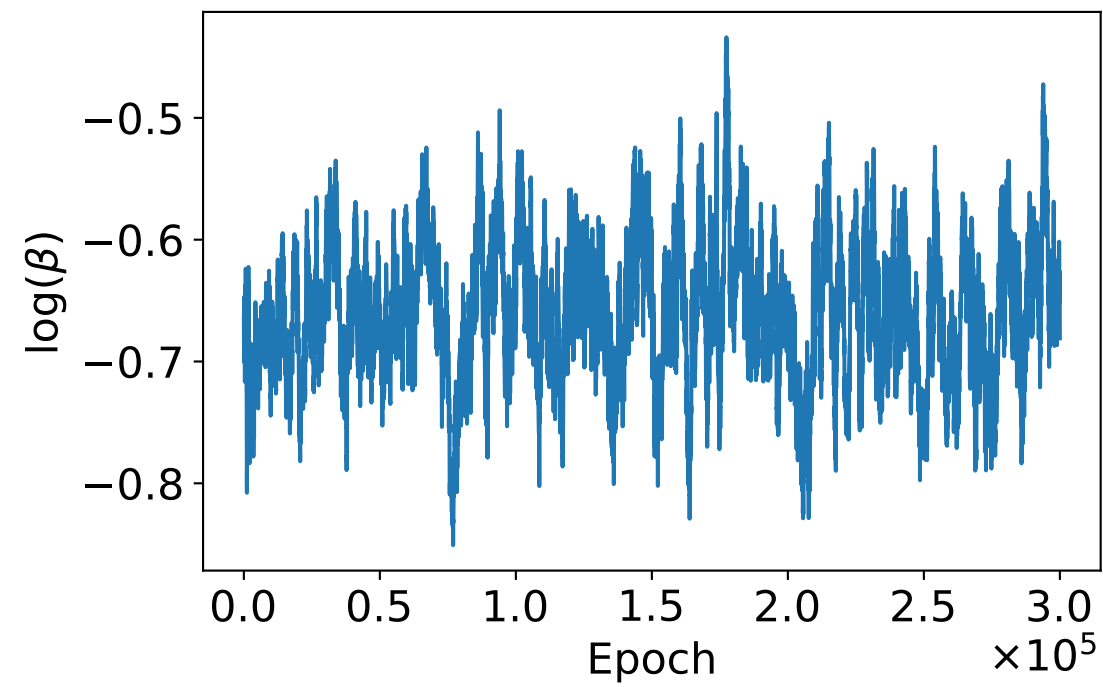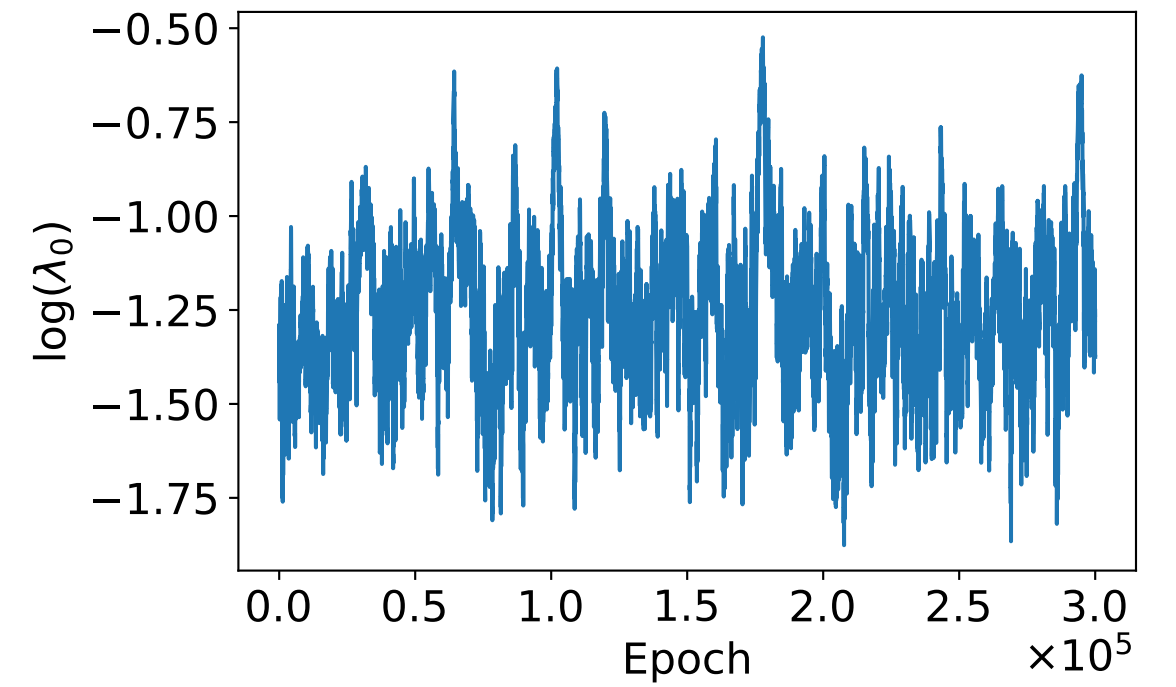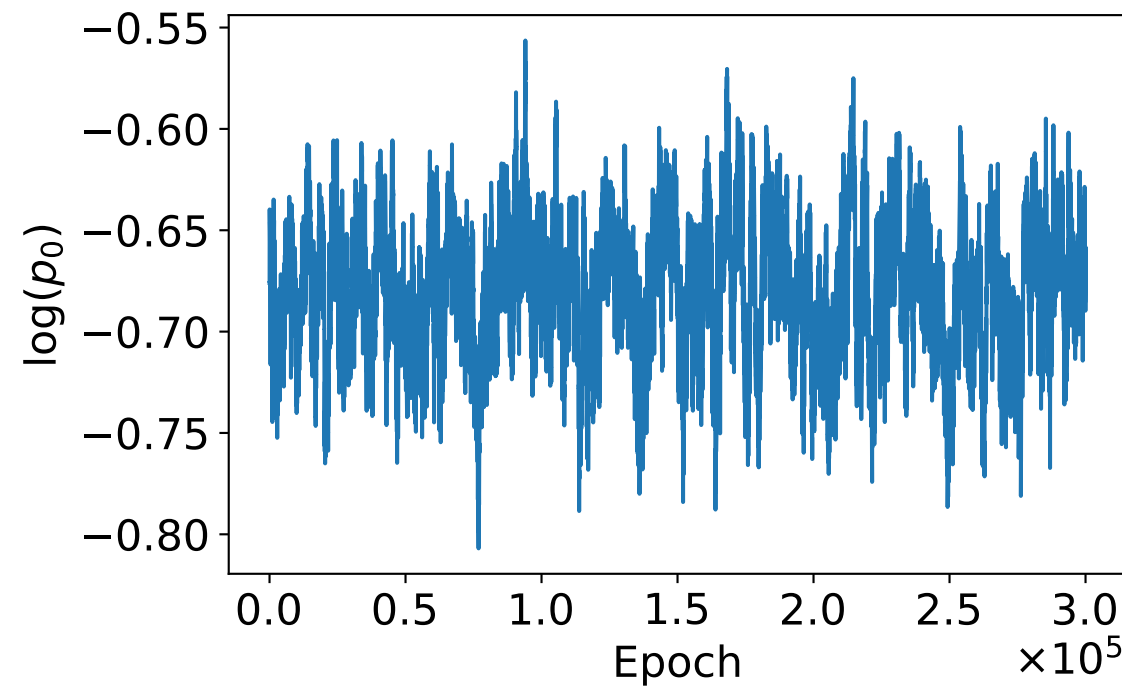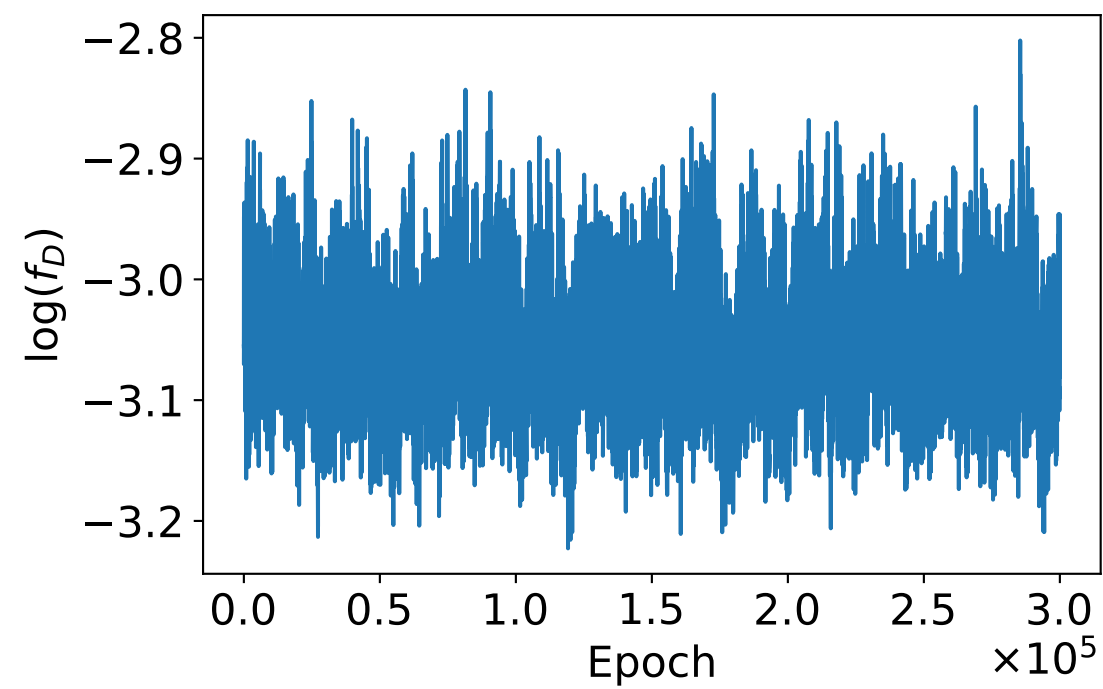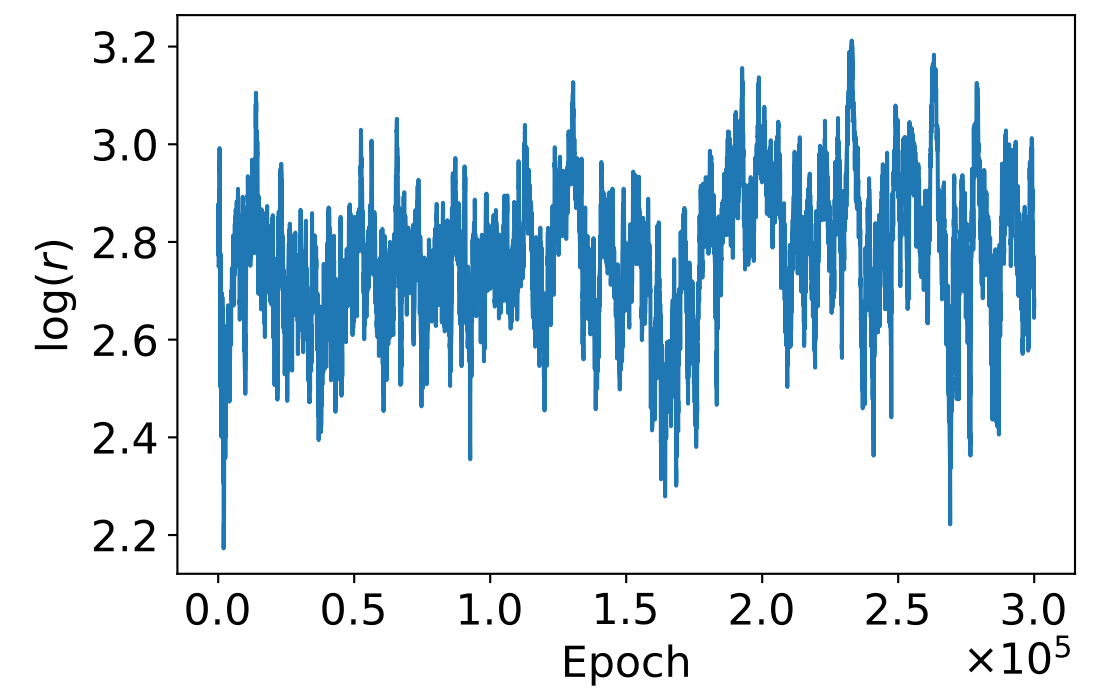



# Indiana

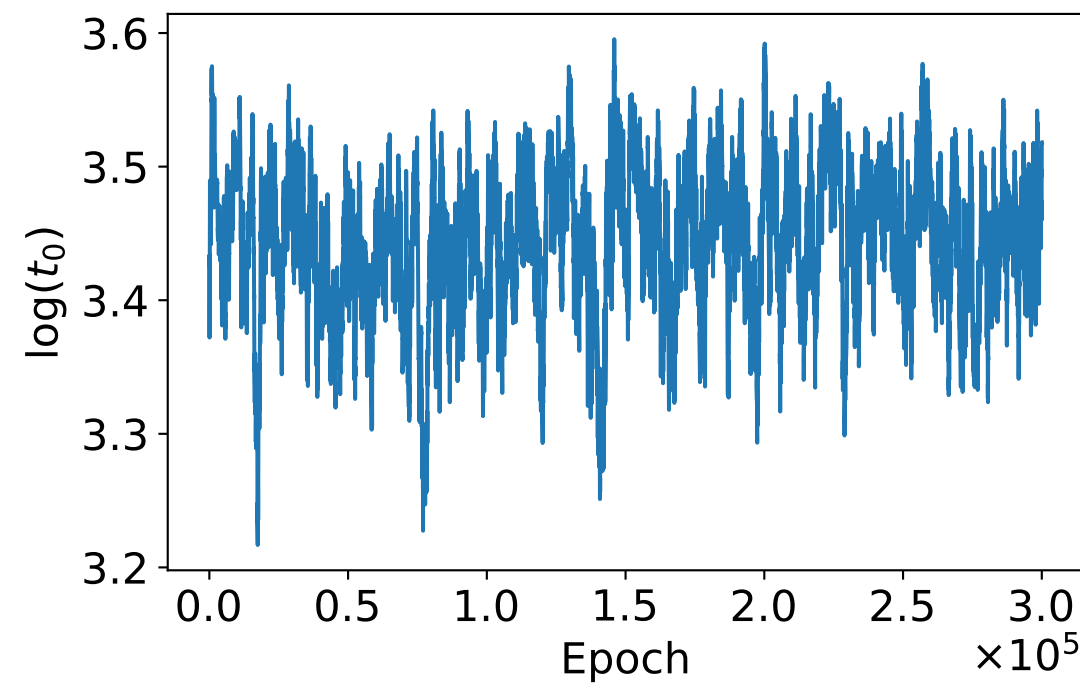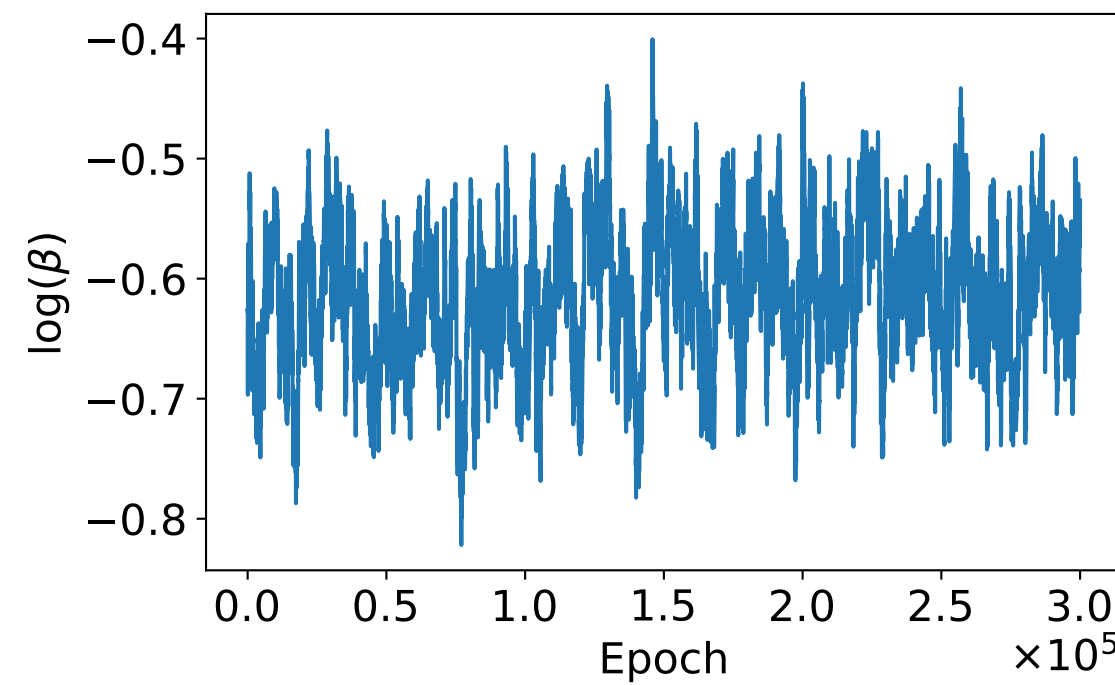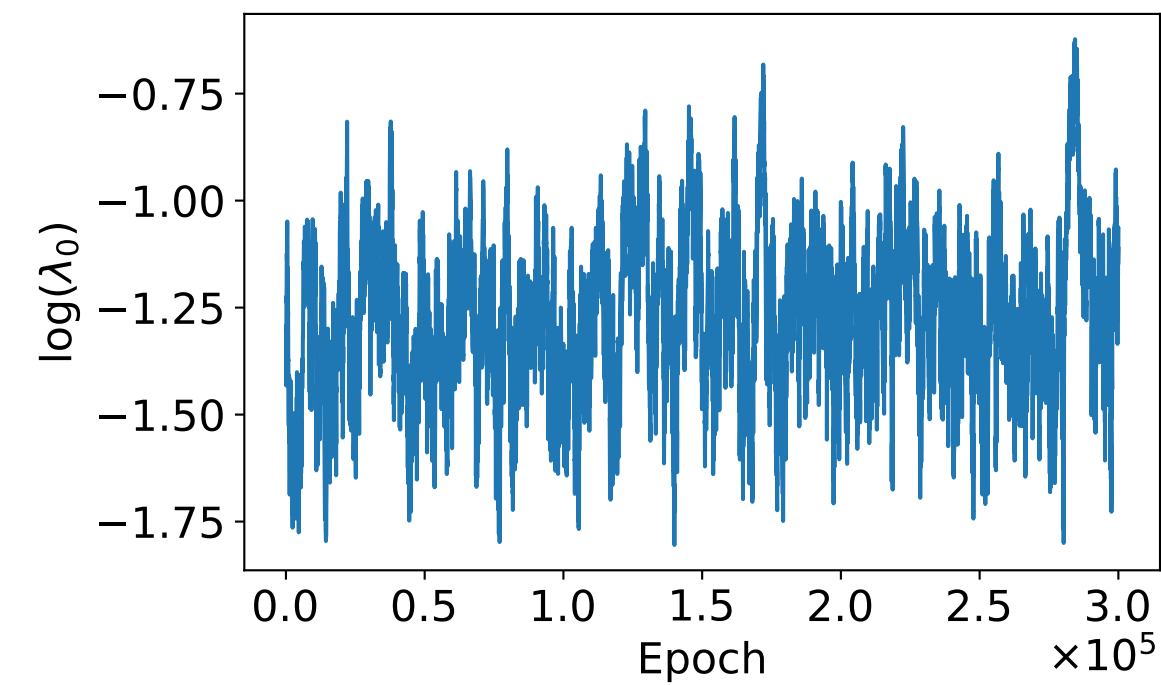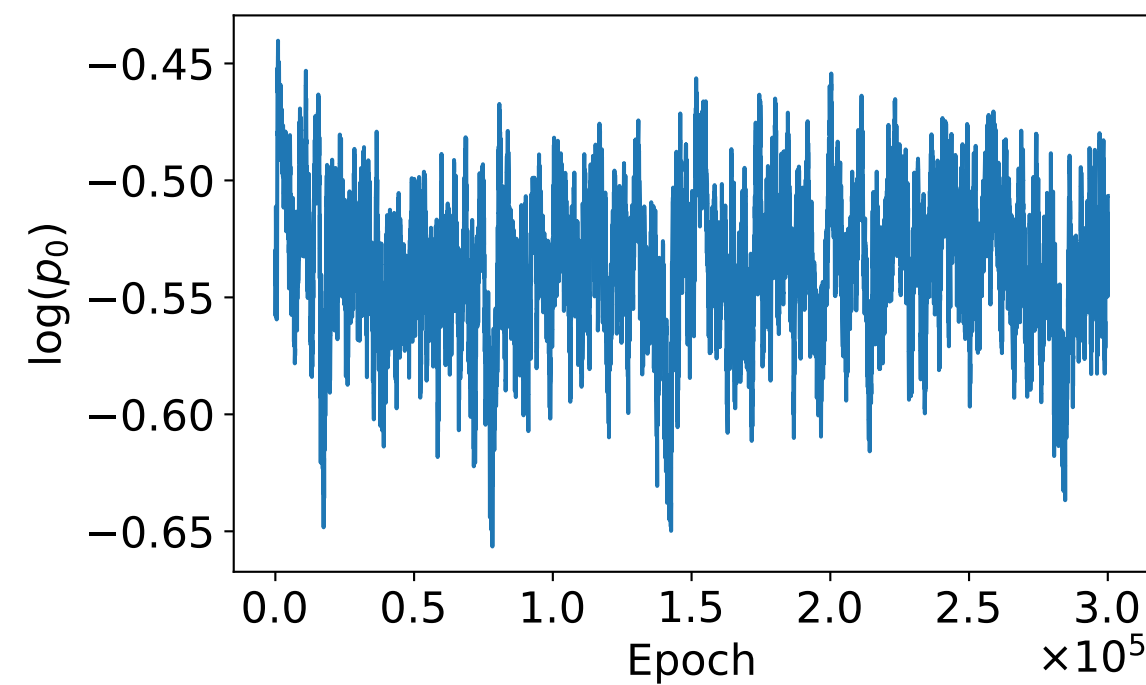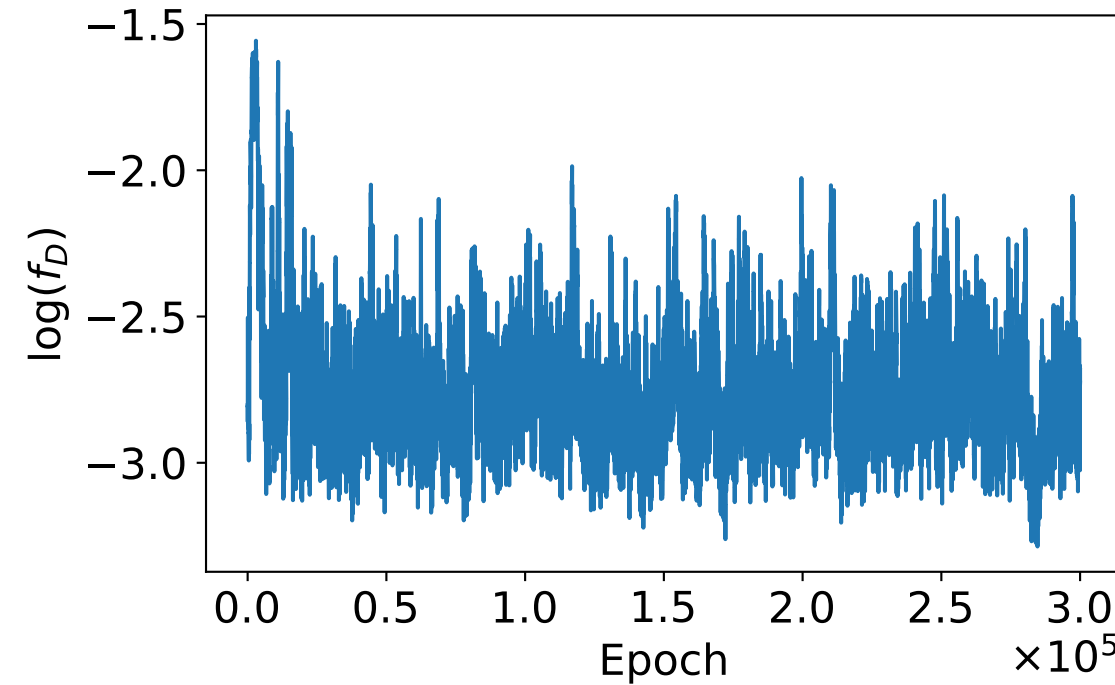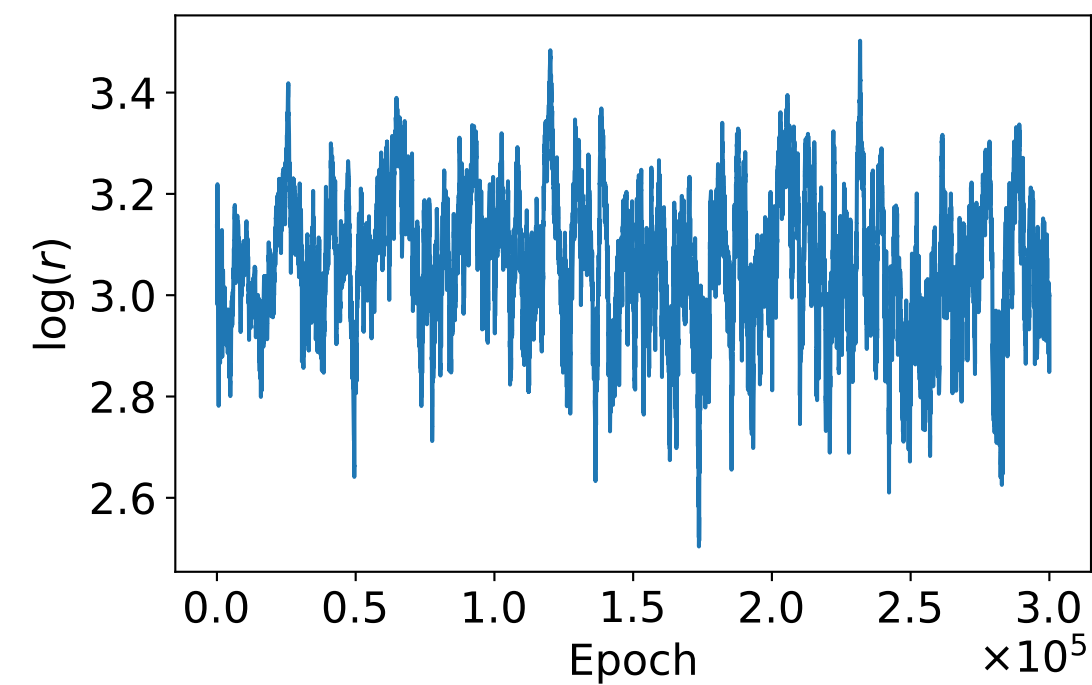

Iowa

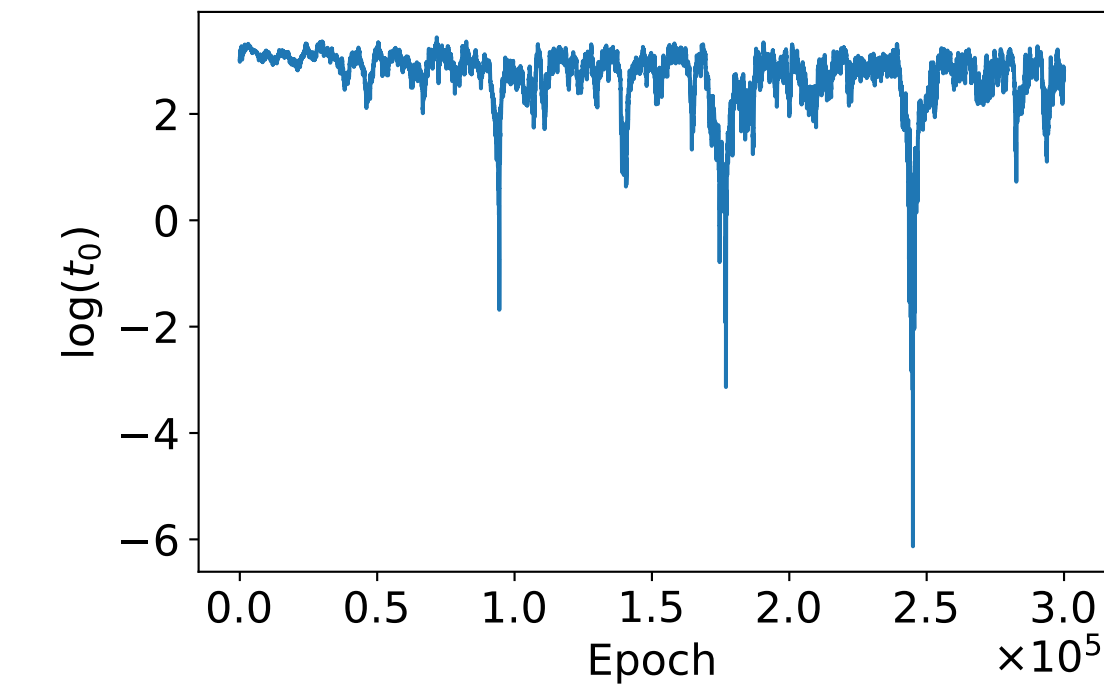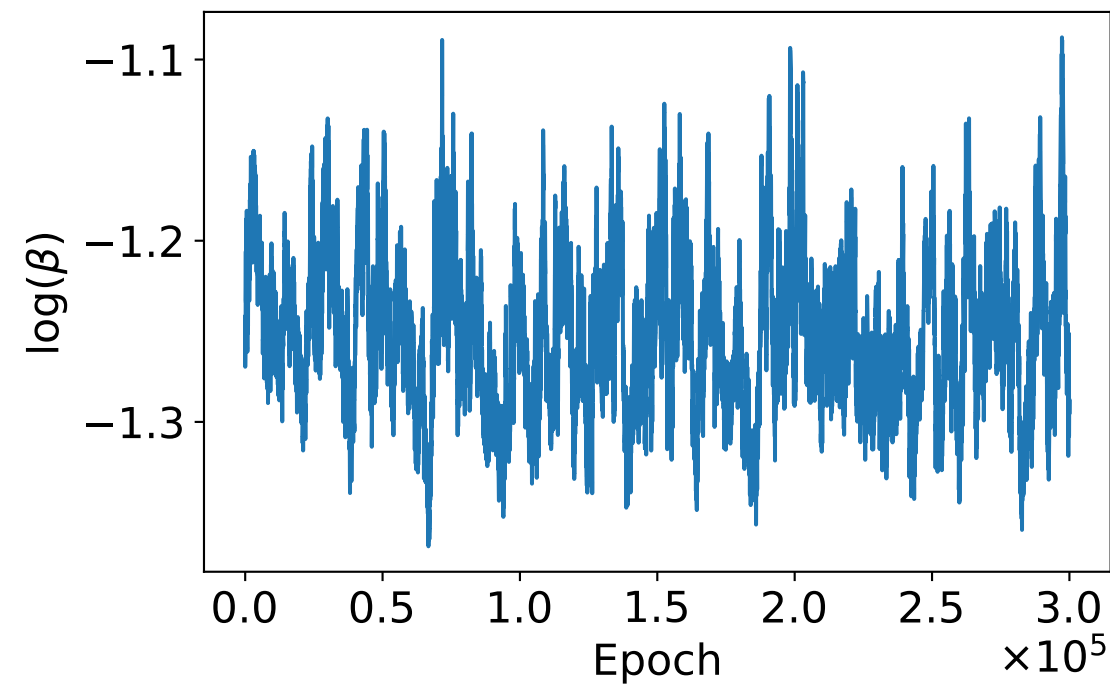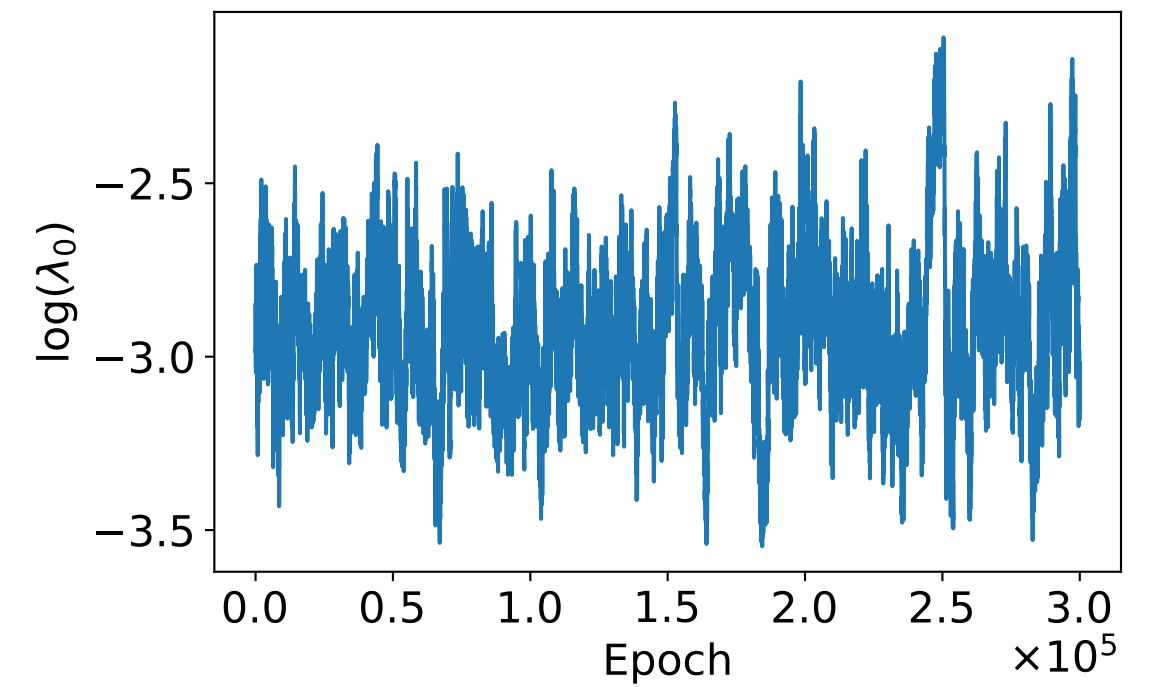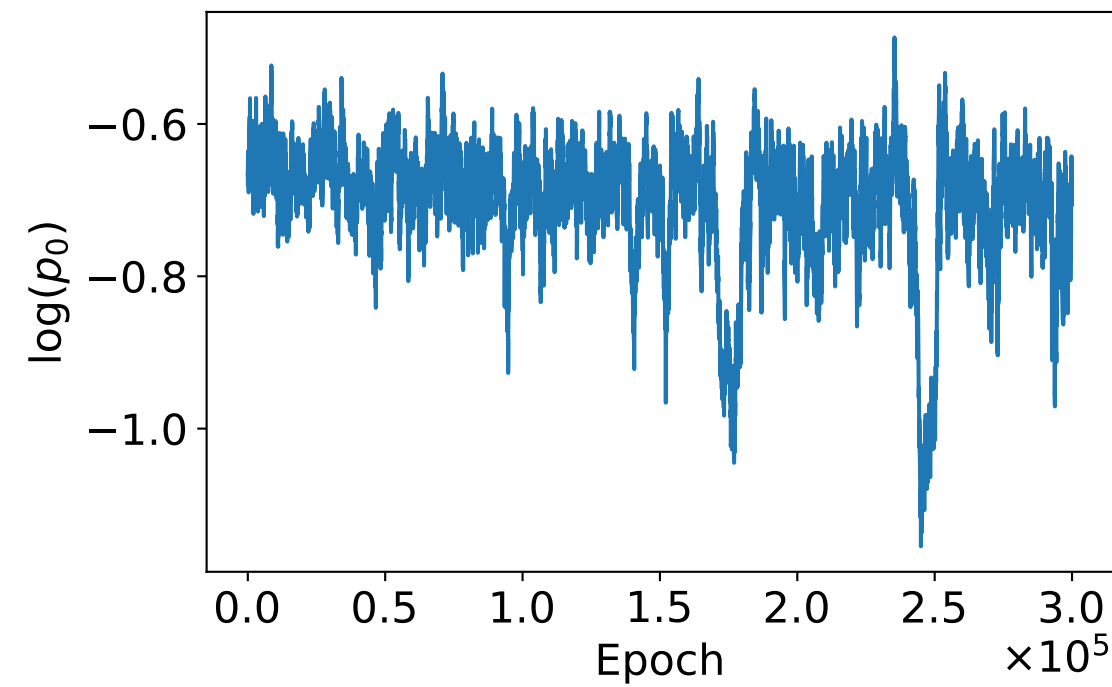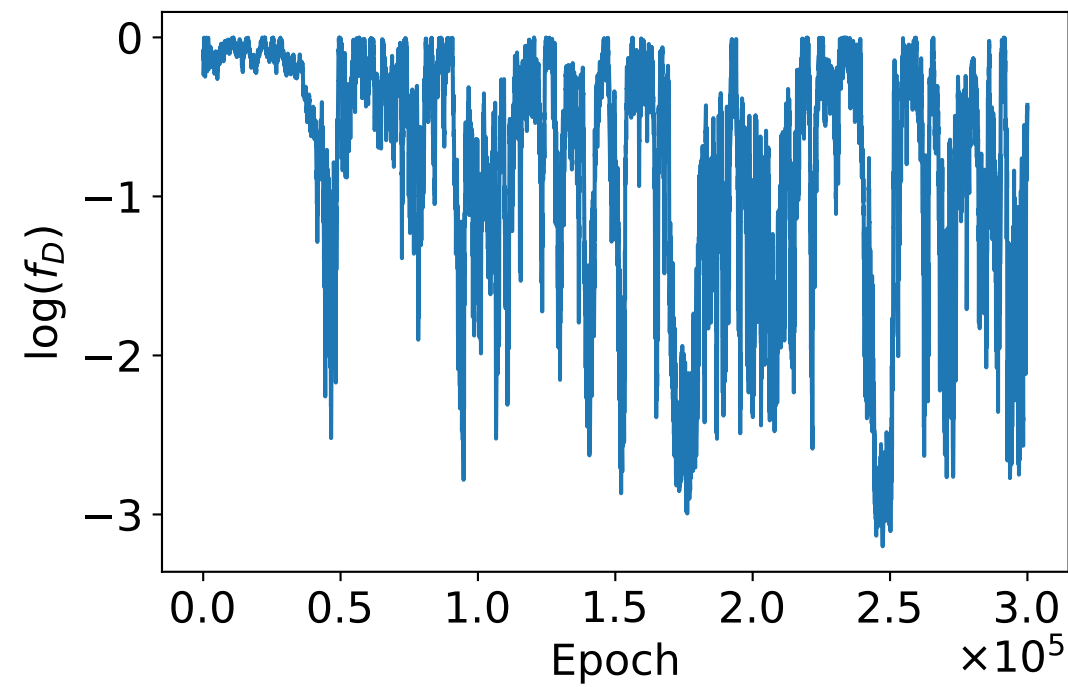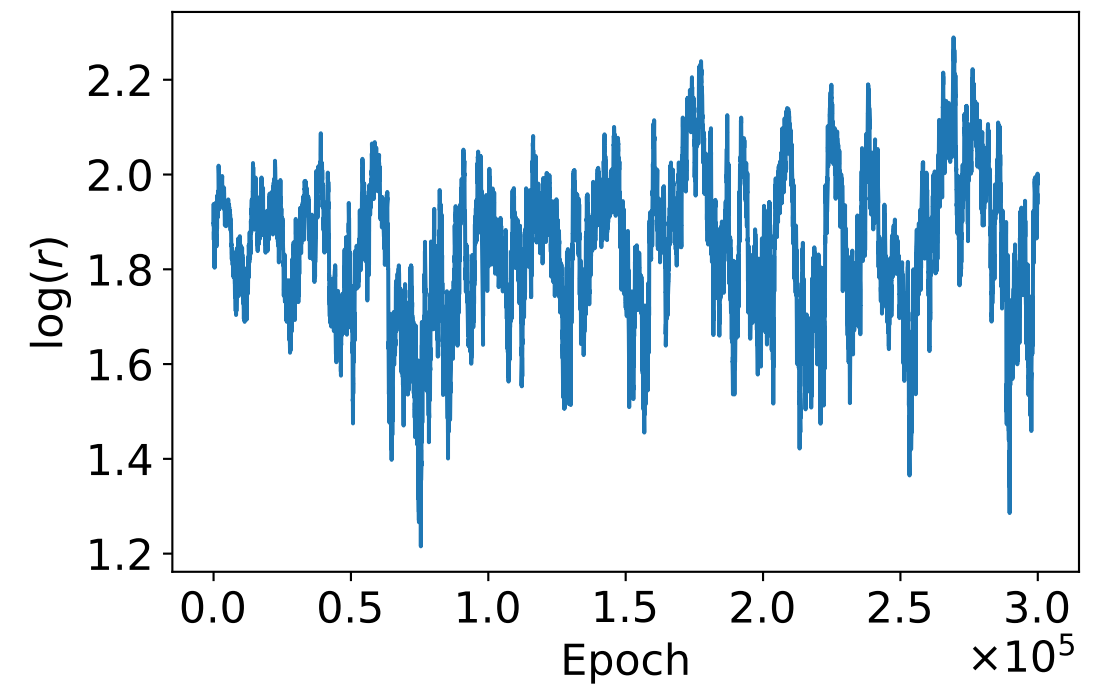

Kansas

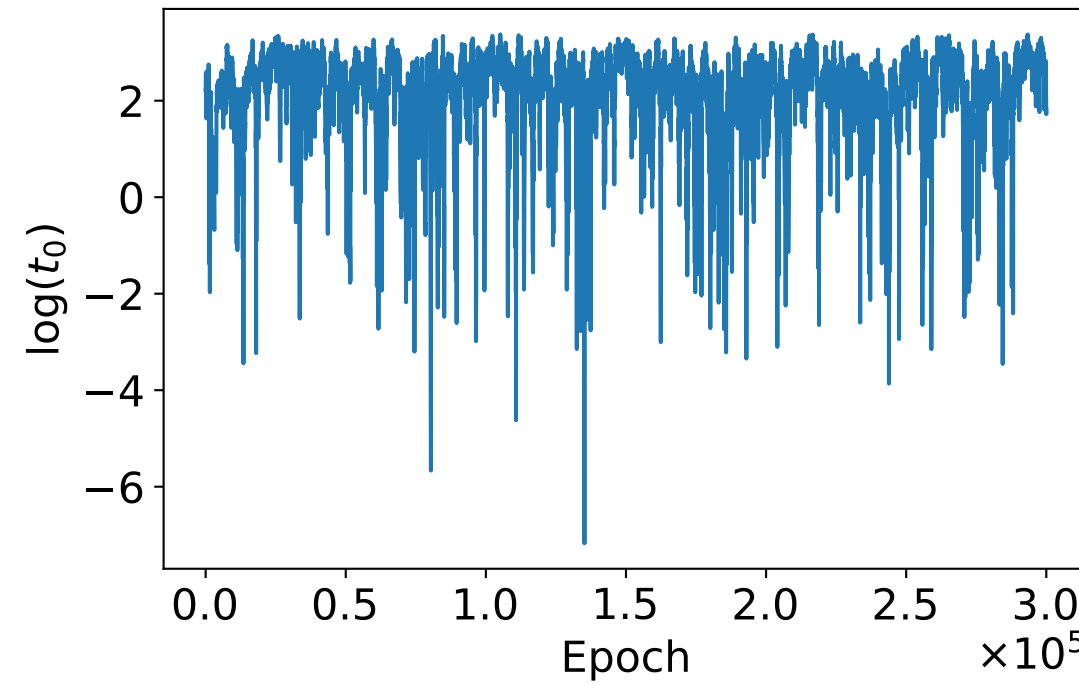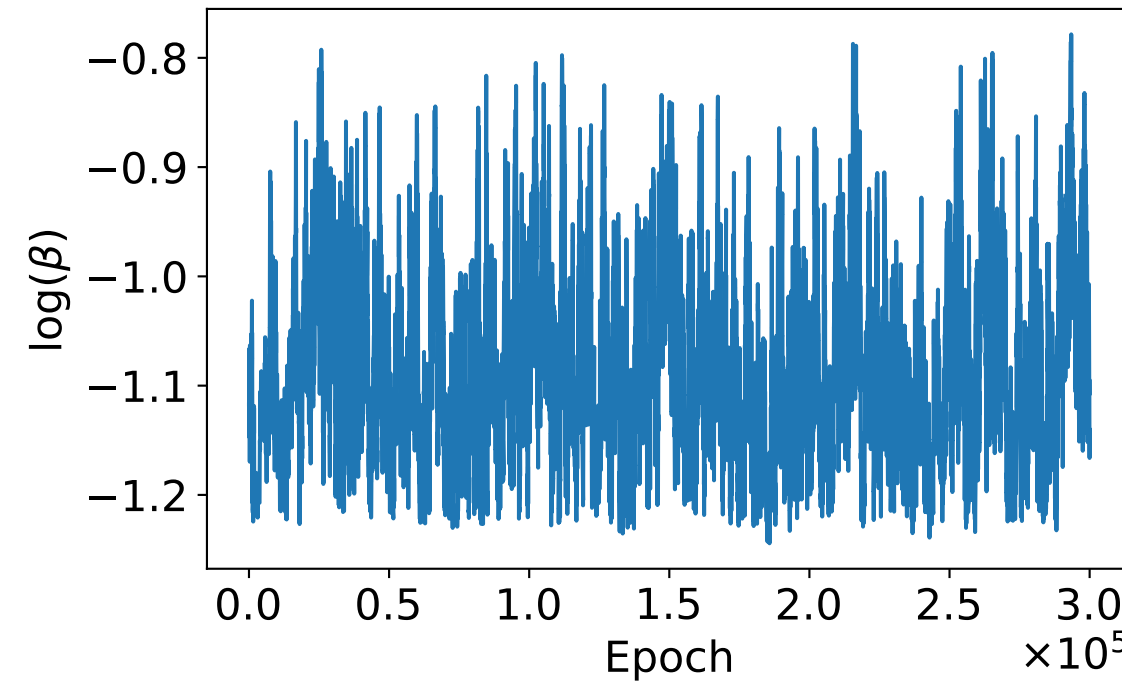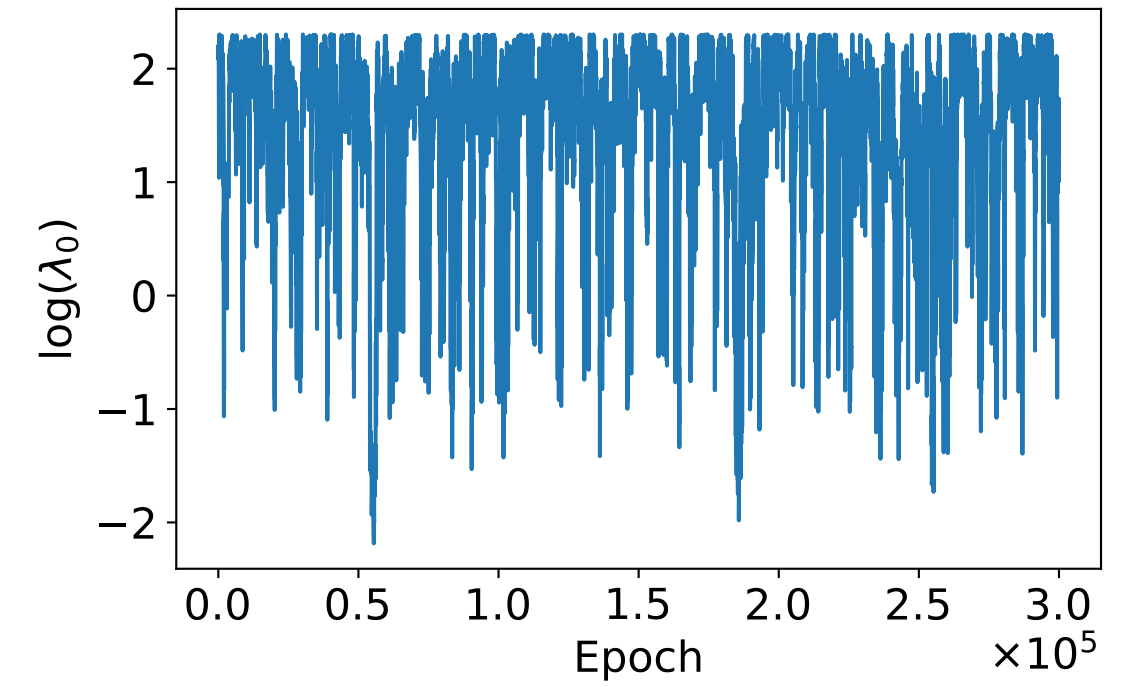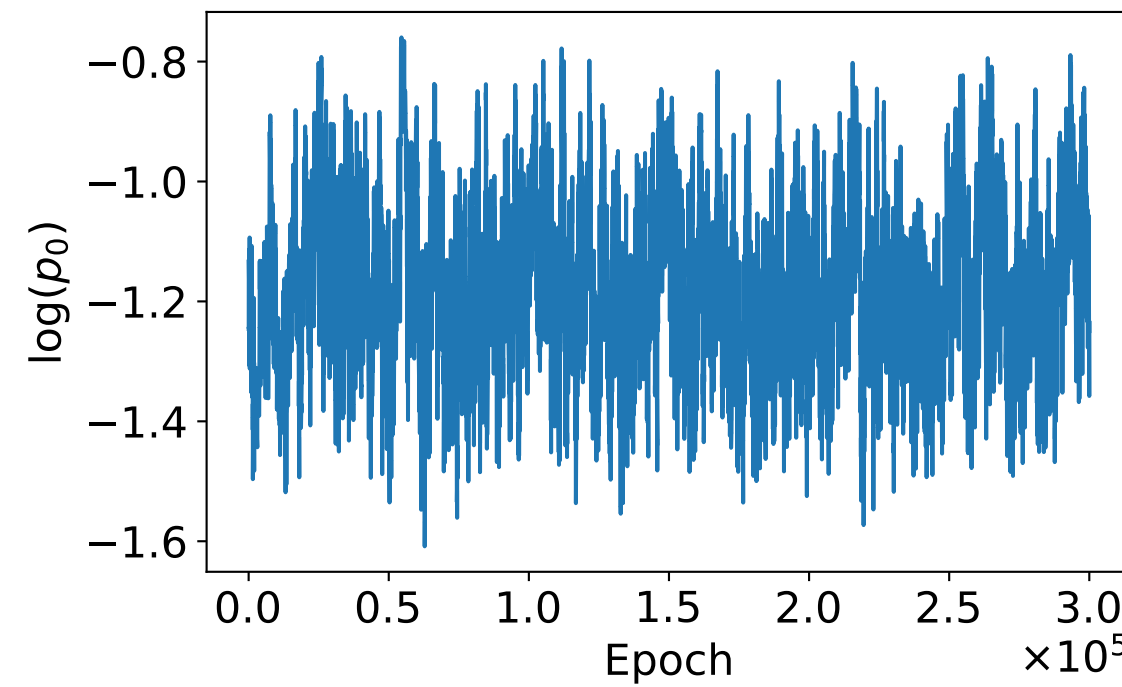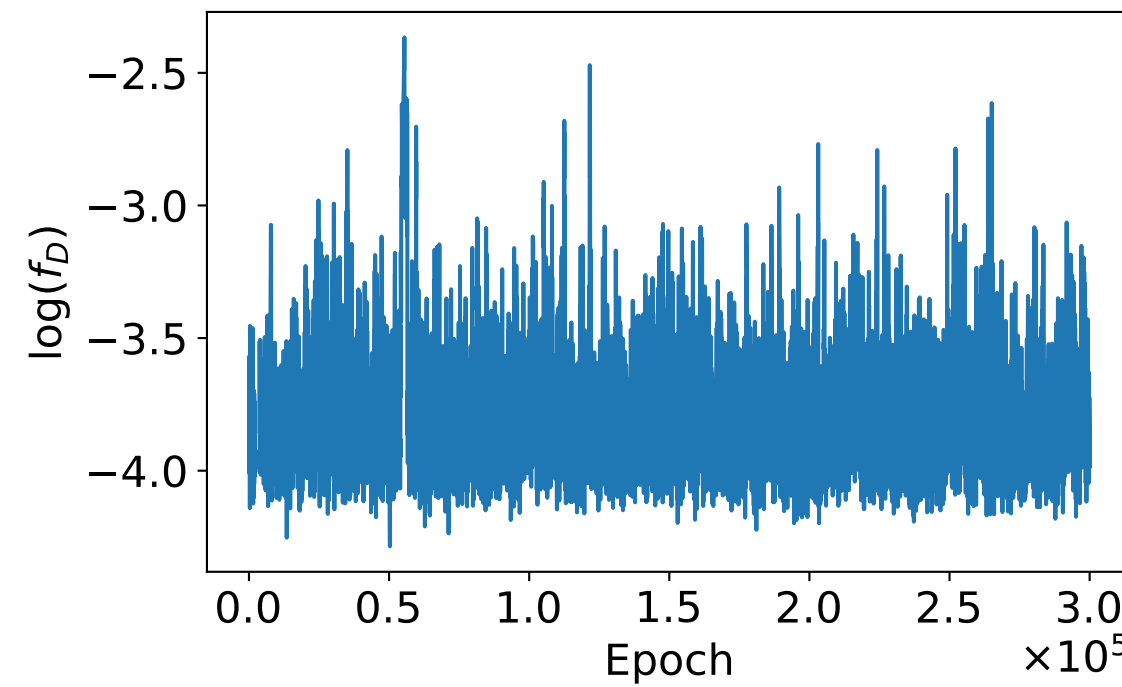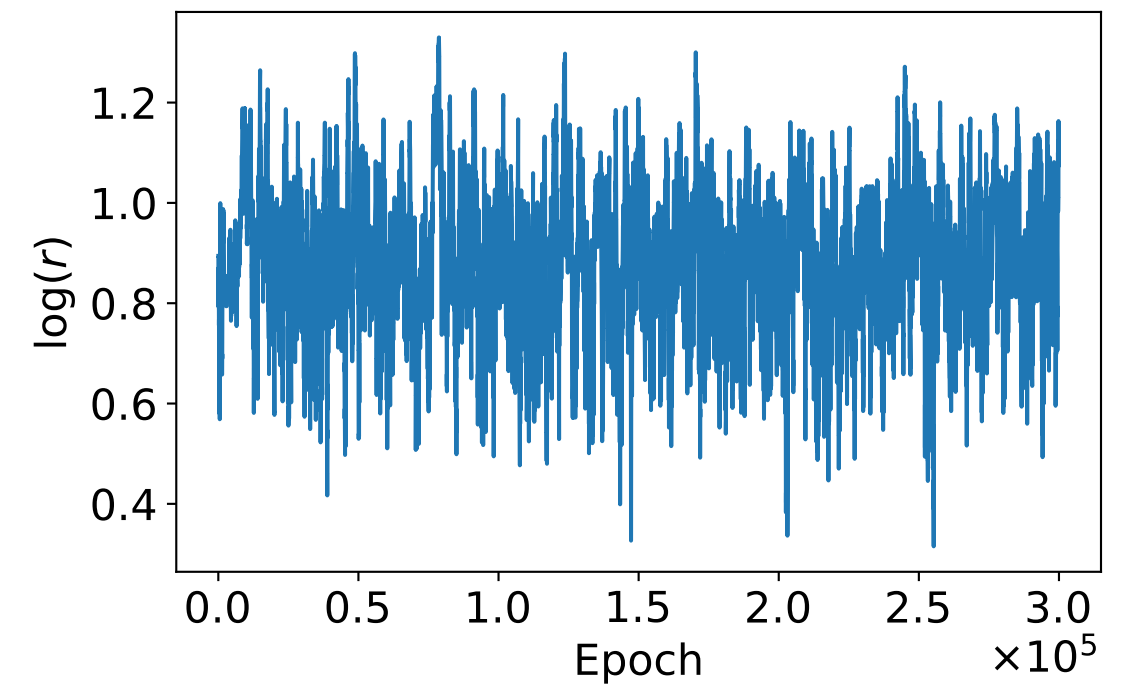

# Kentucky

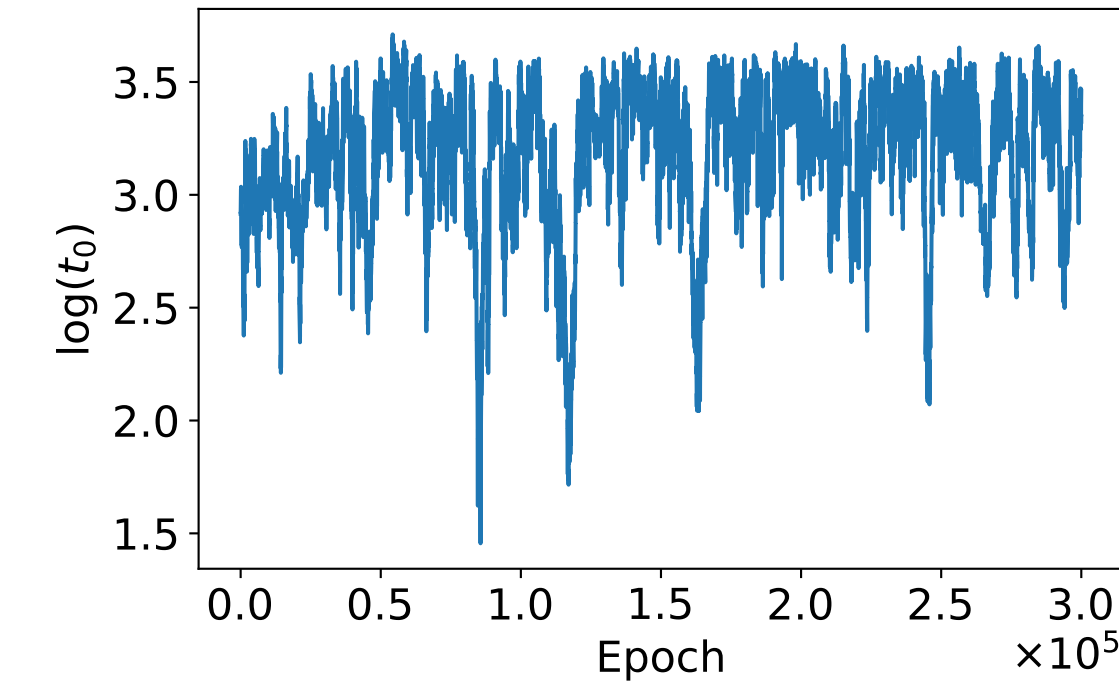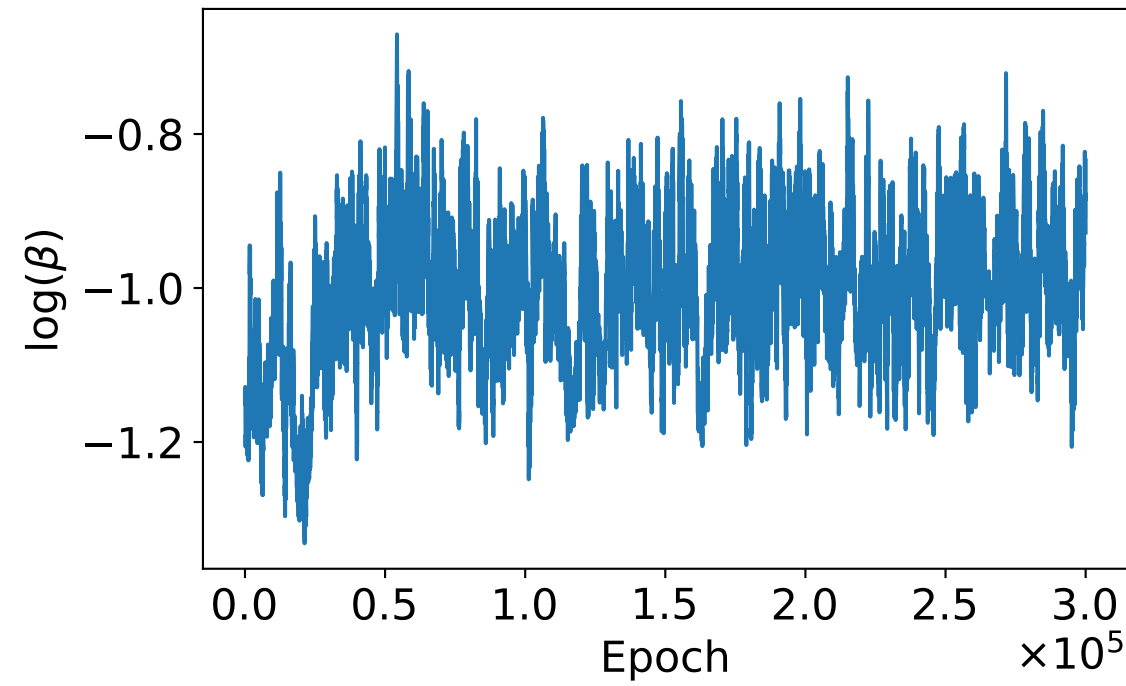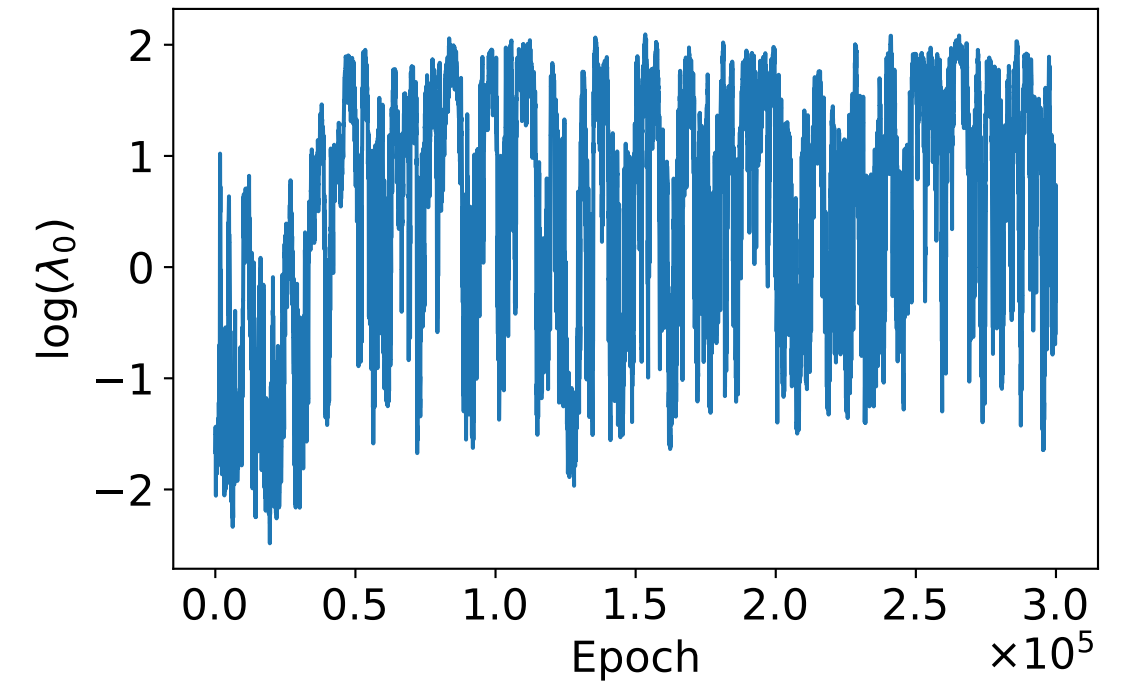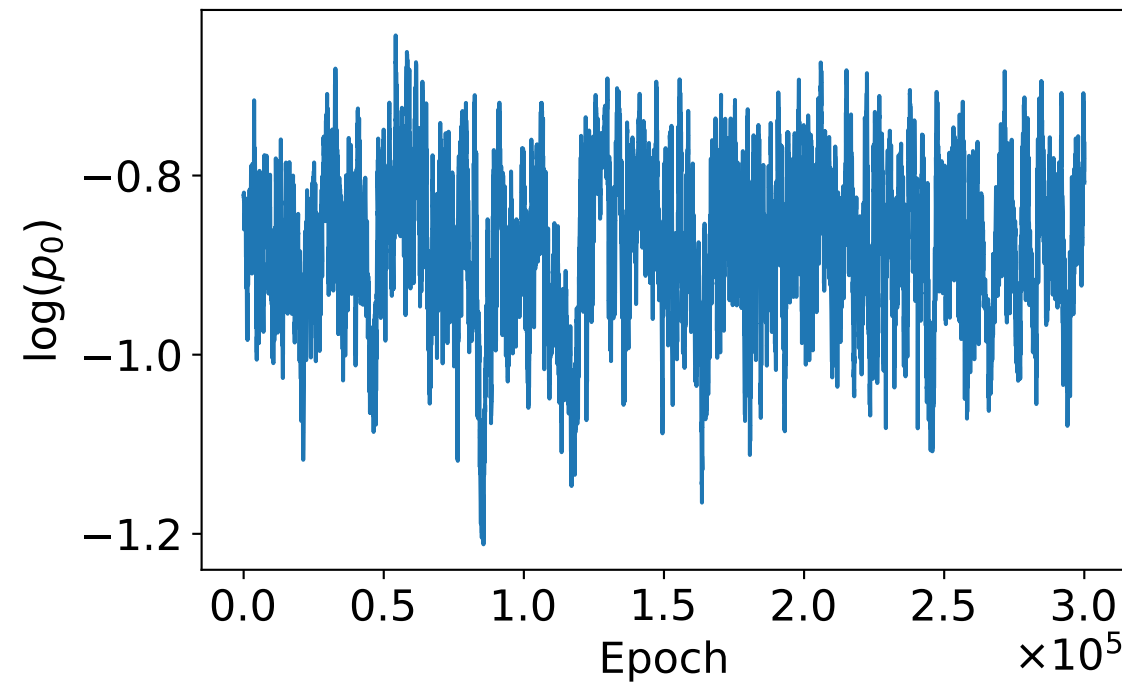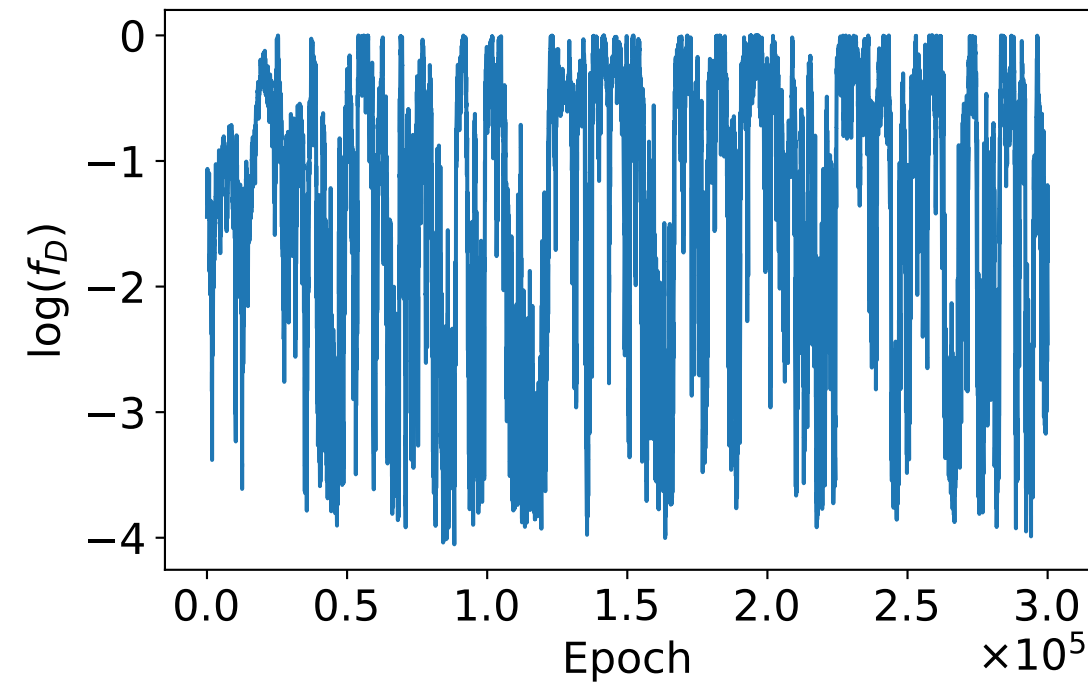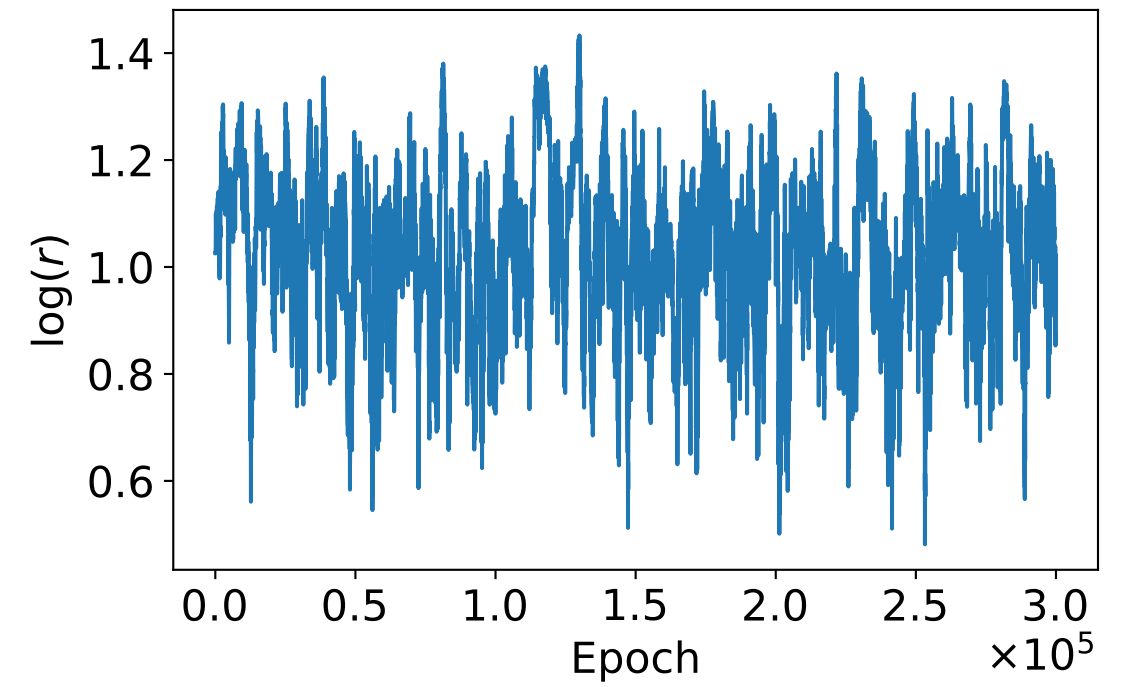

# Louisiana

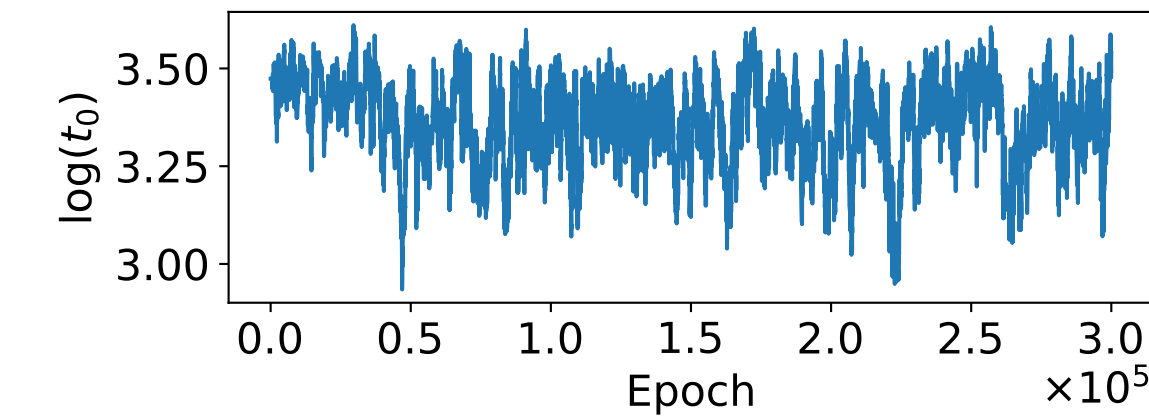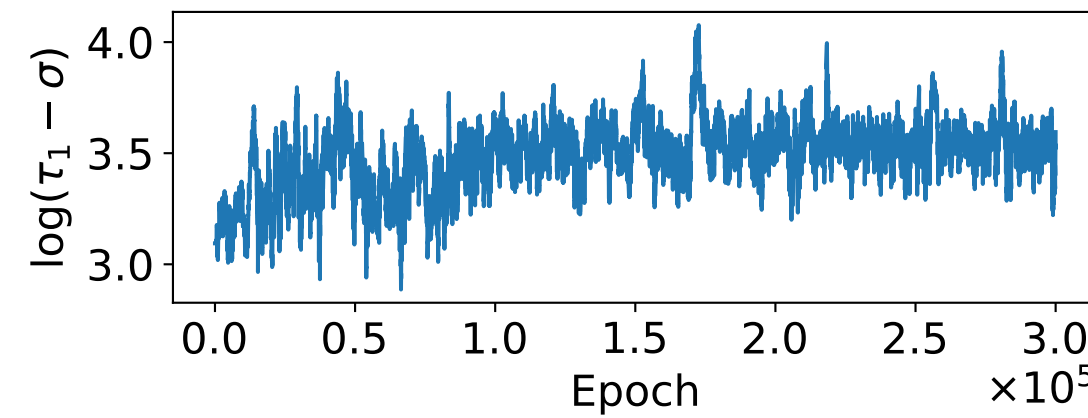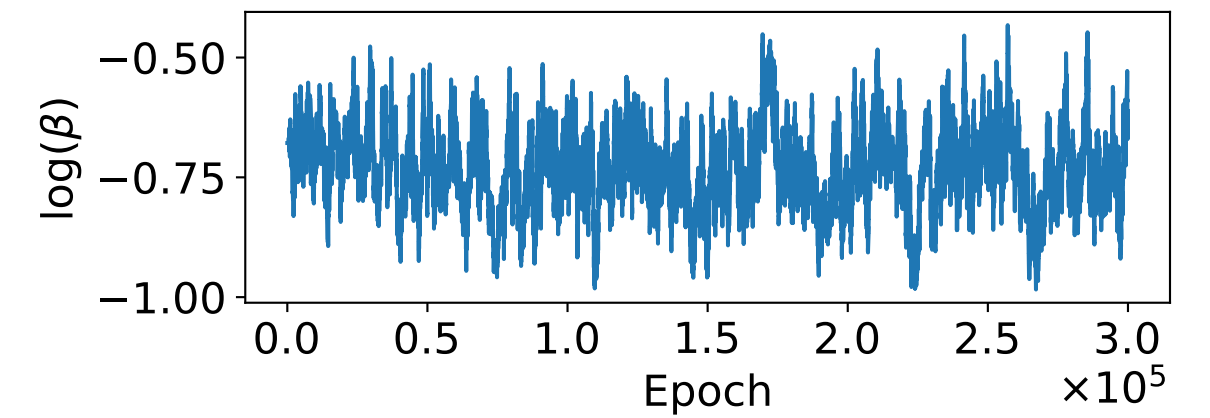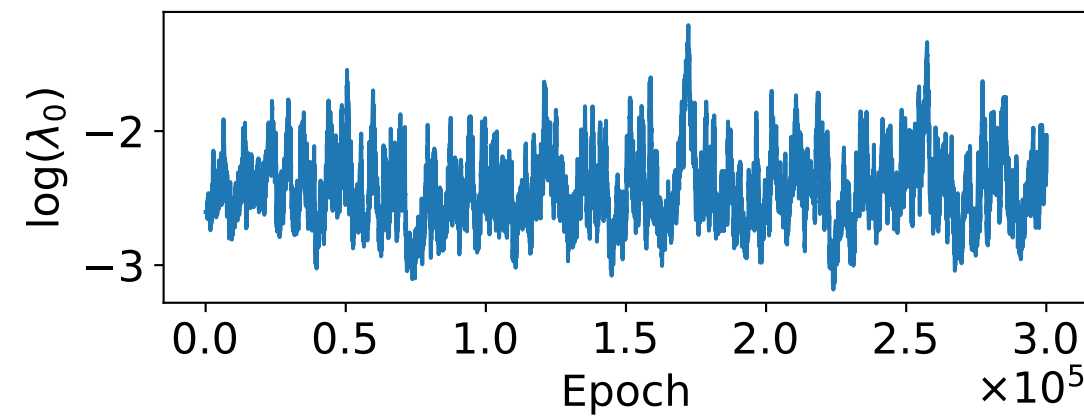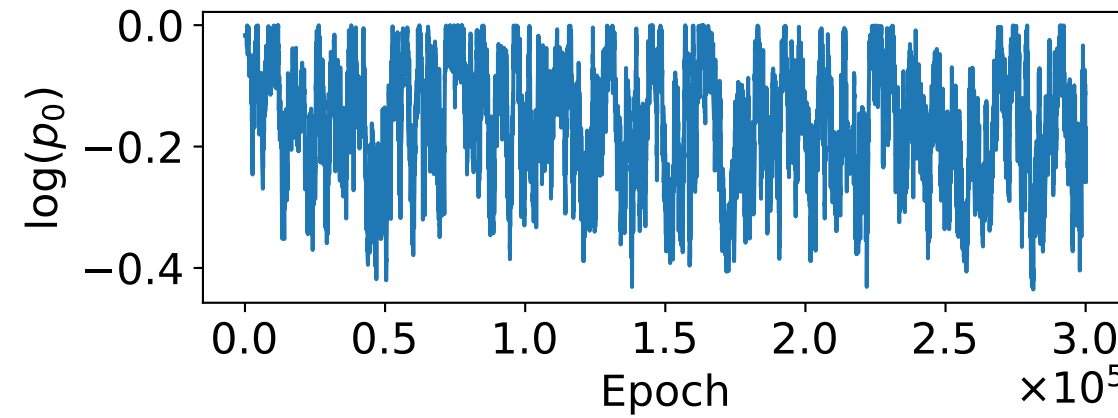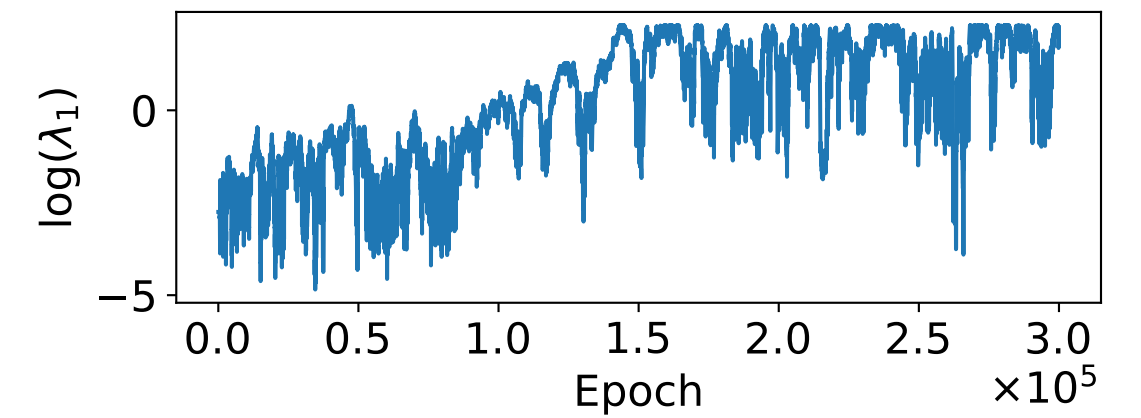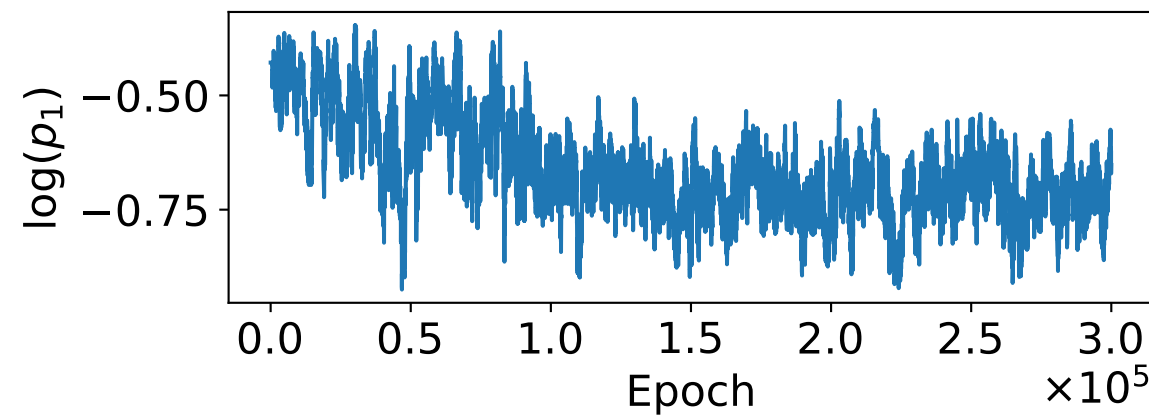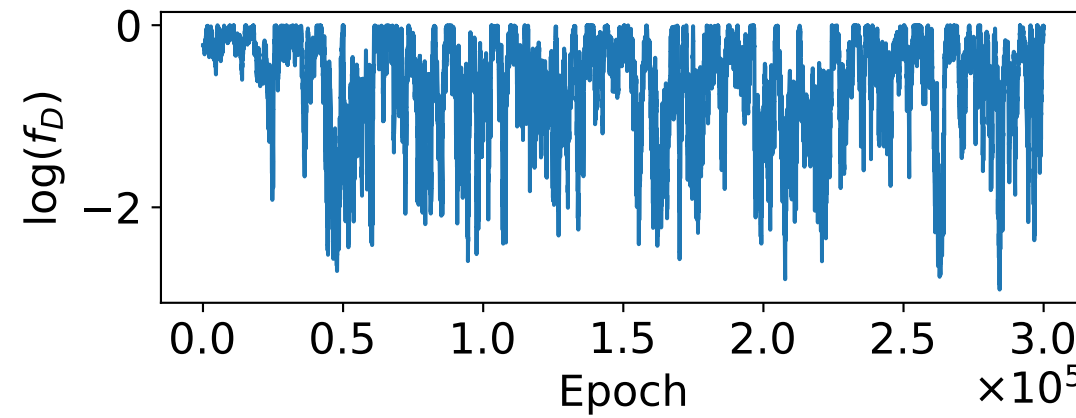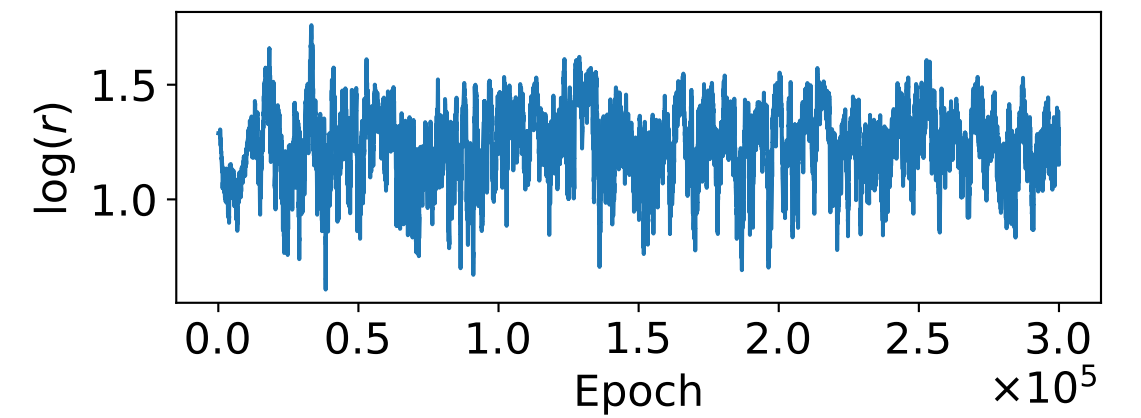

Maine

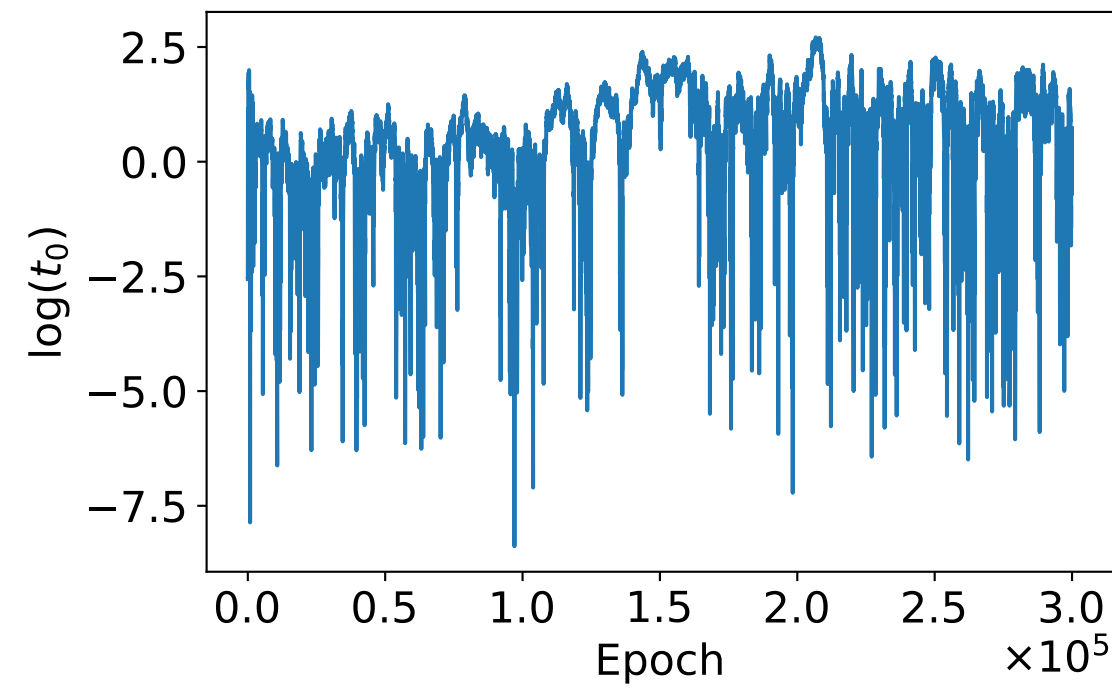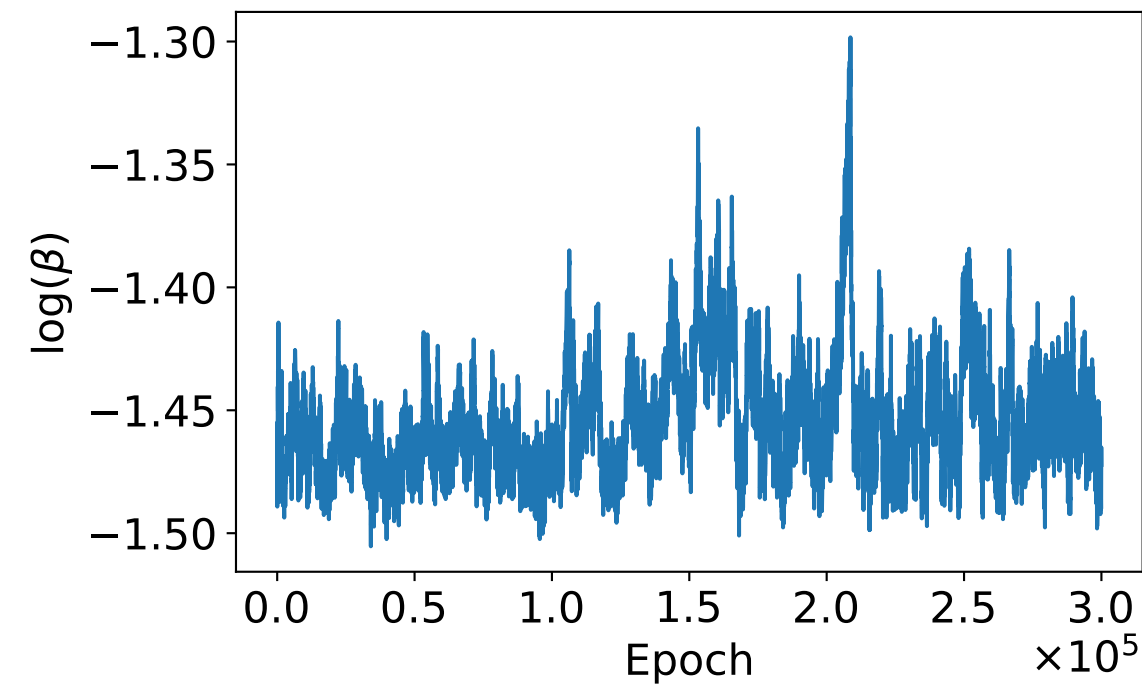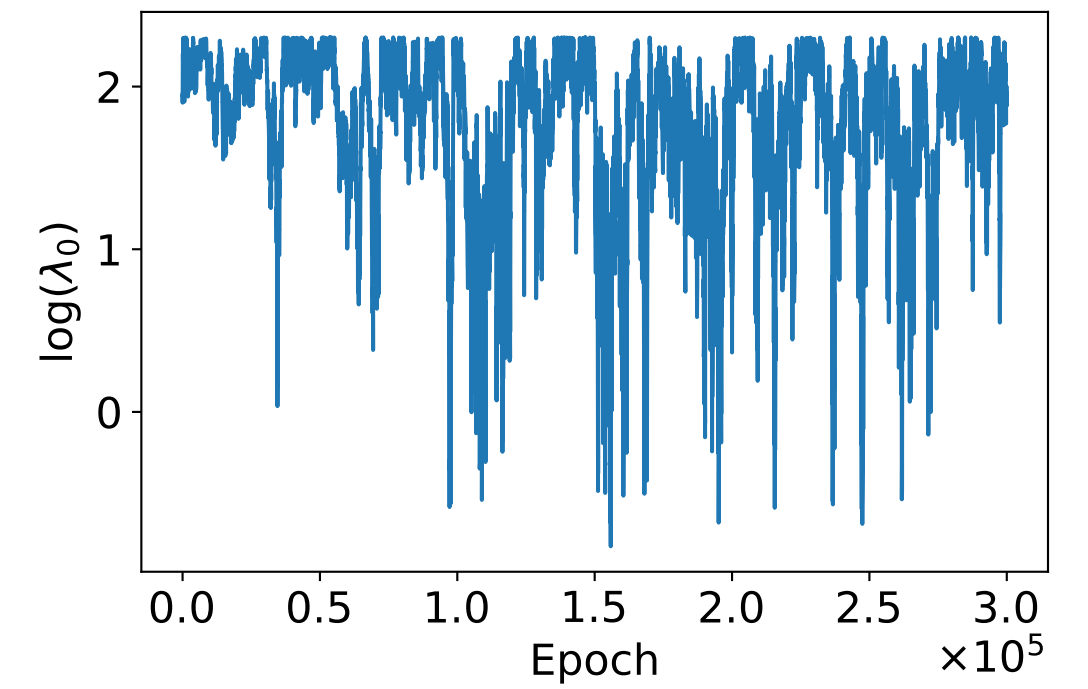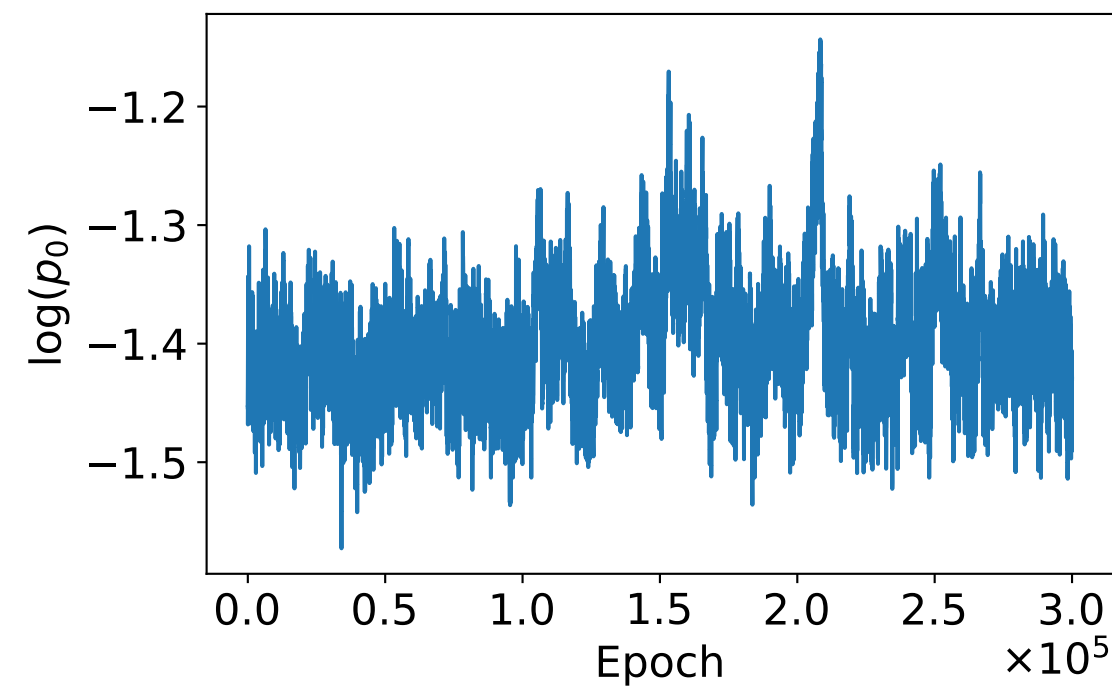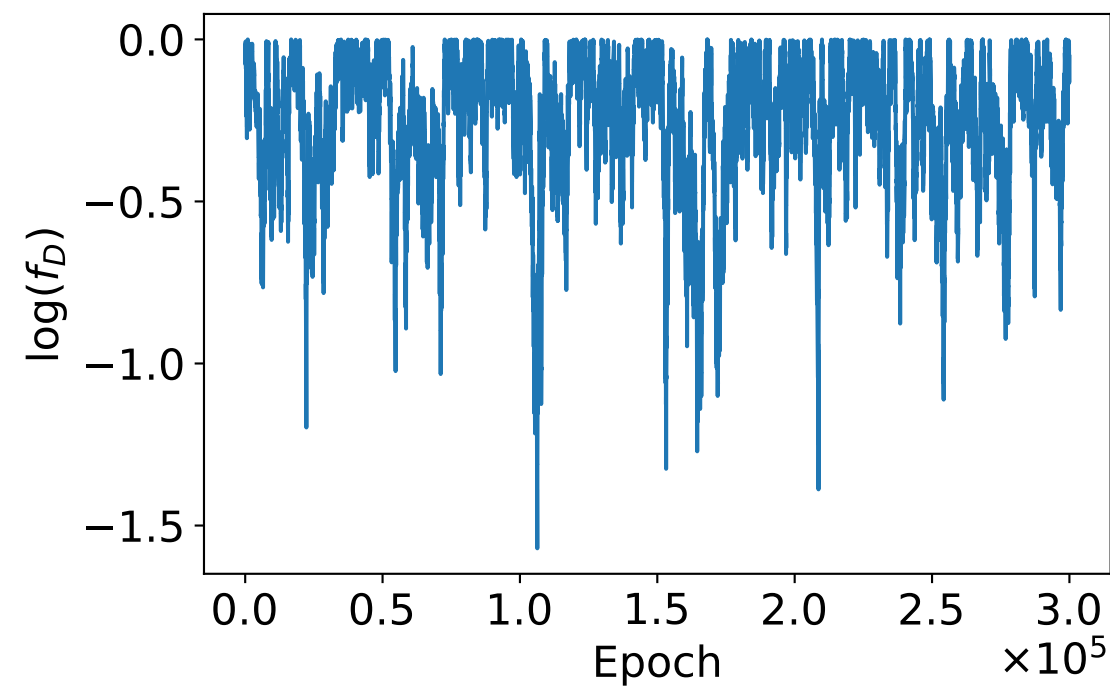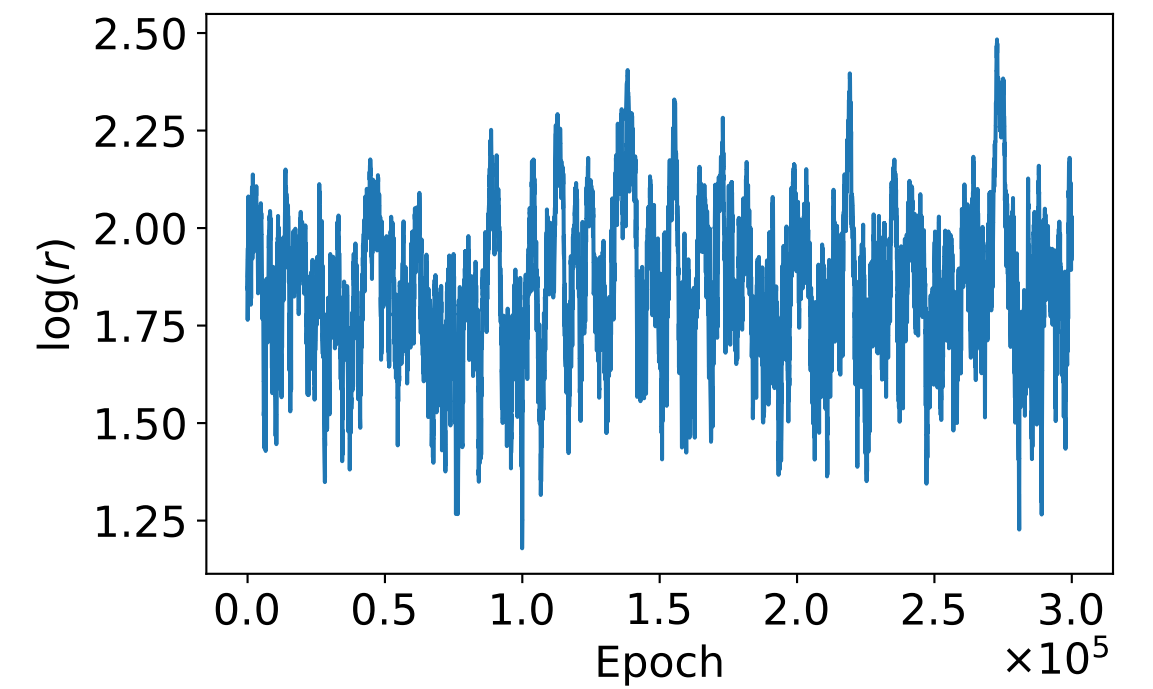

# Maryland

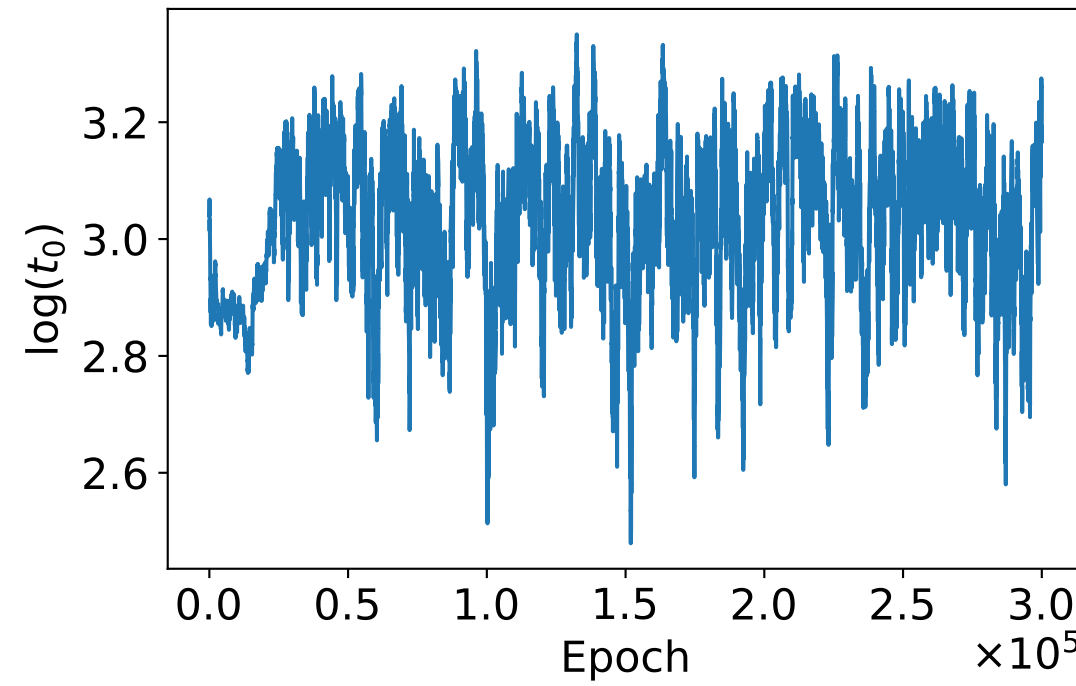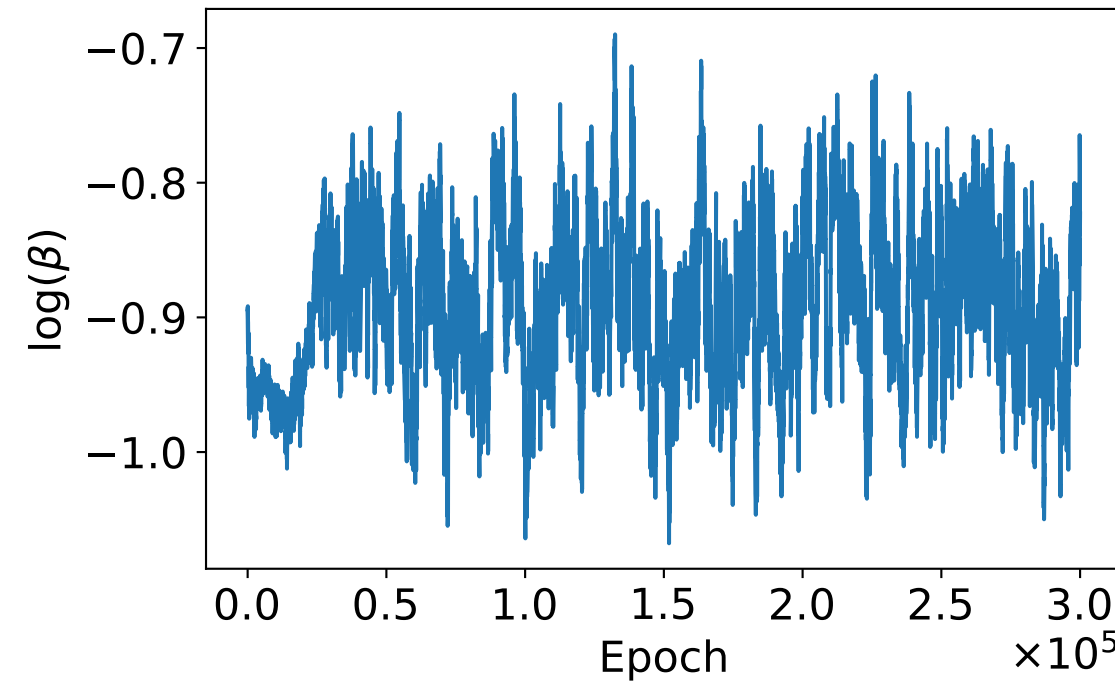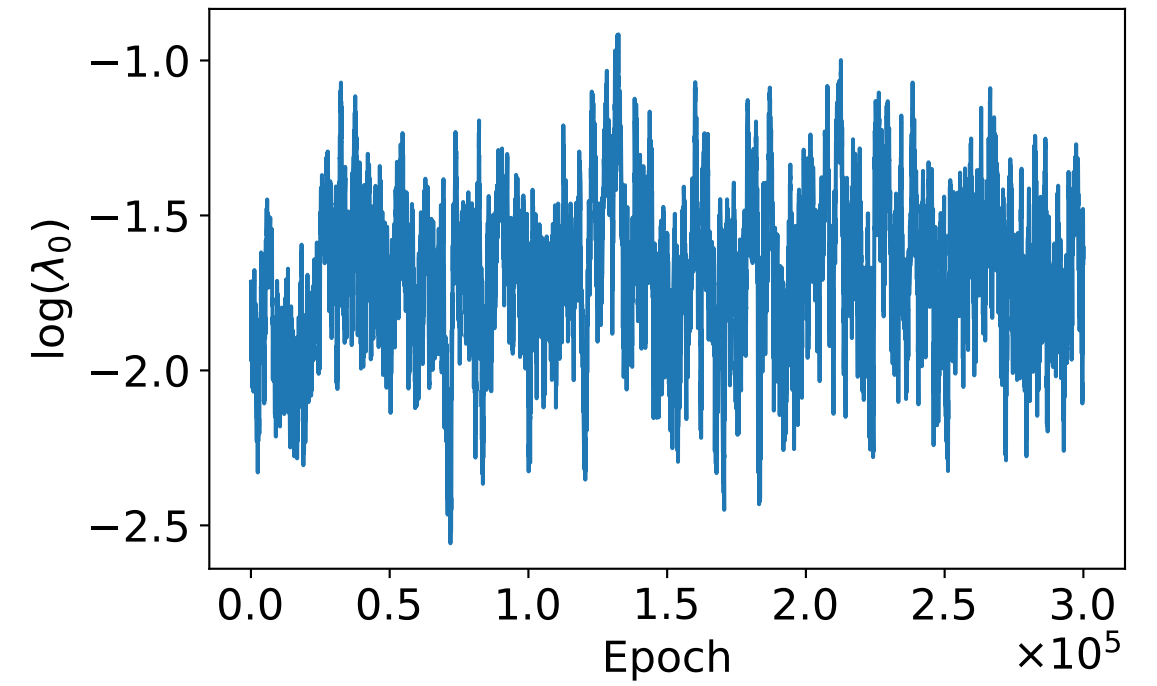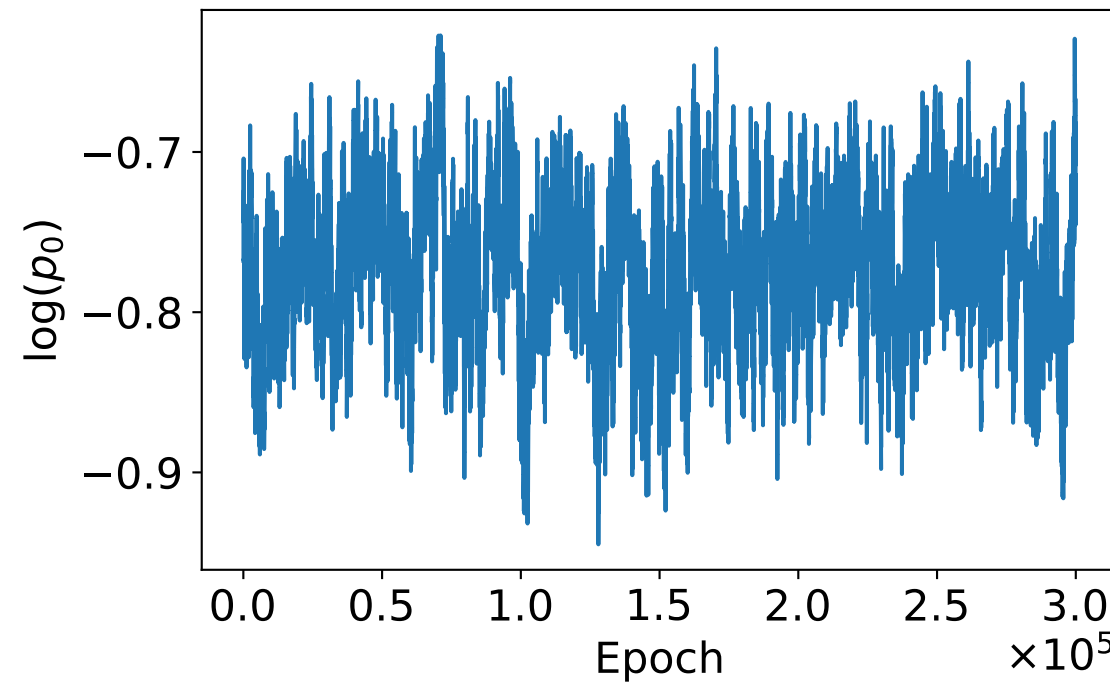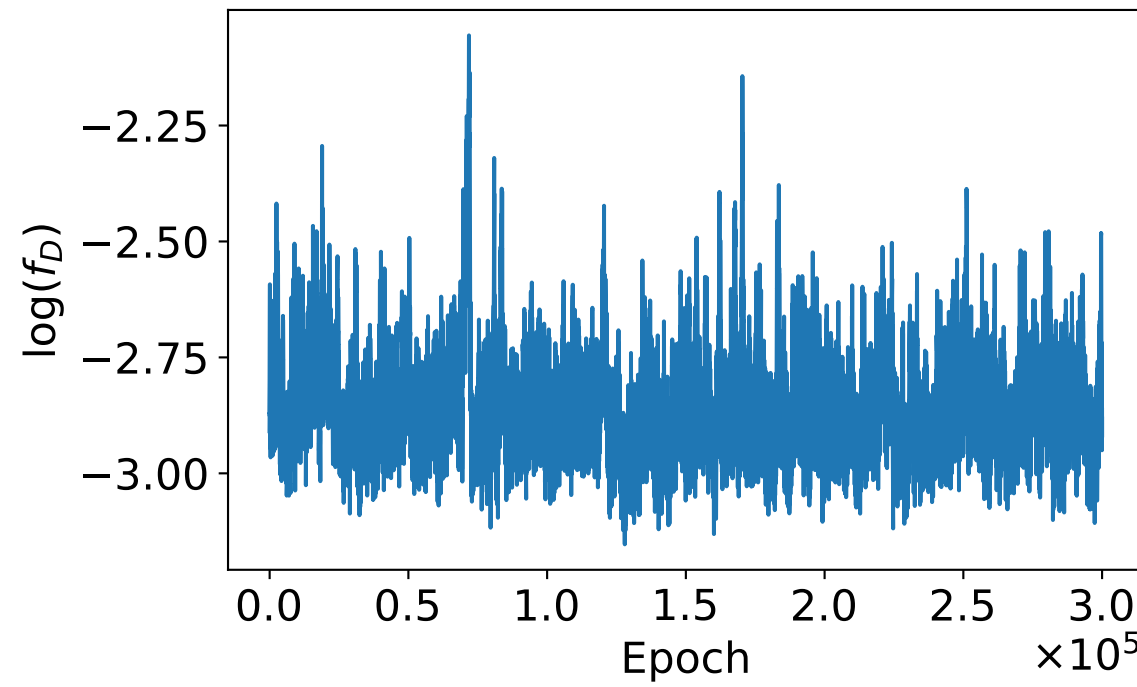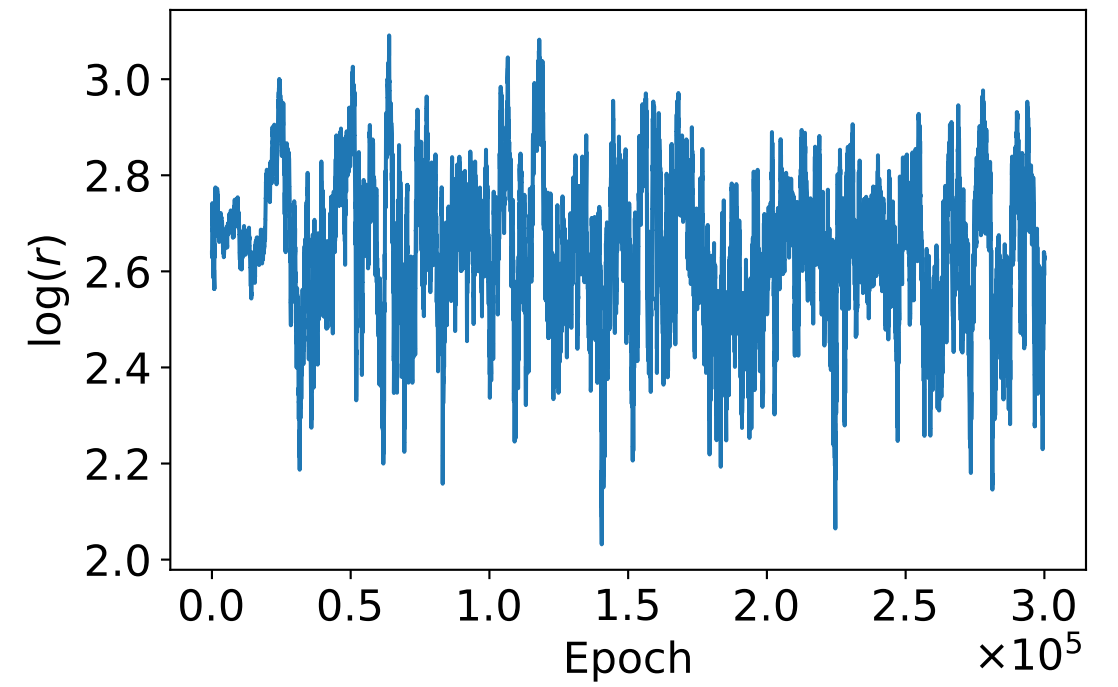

# Massachusetts

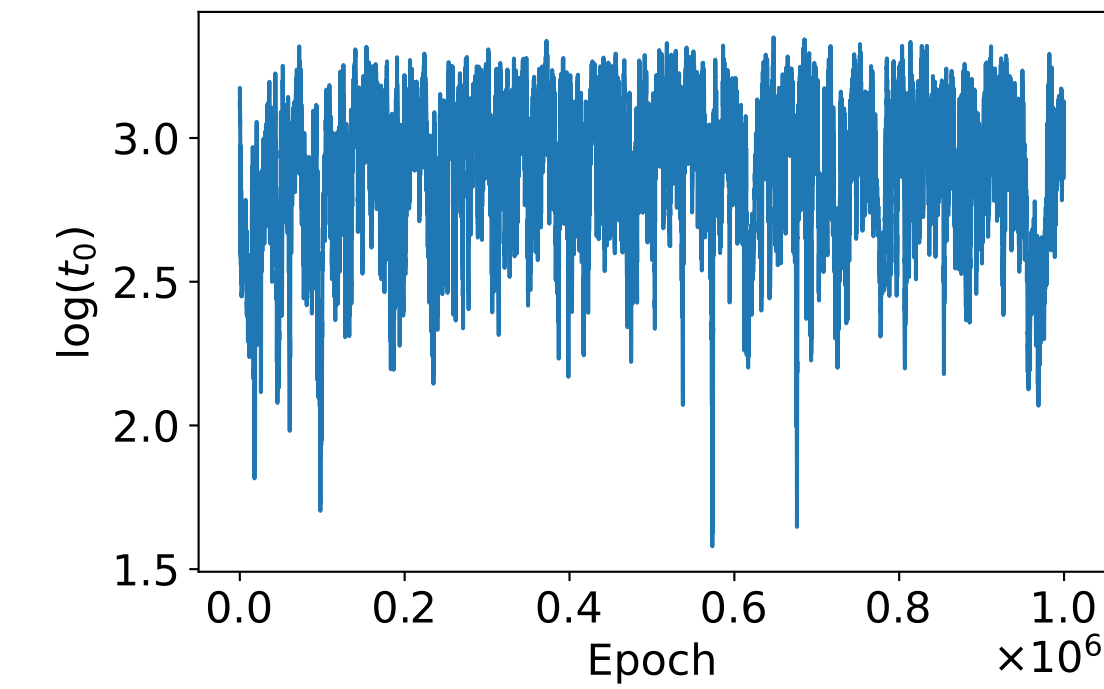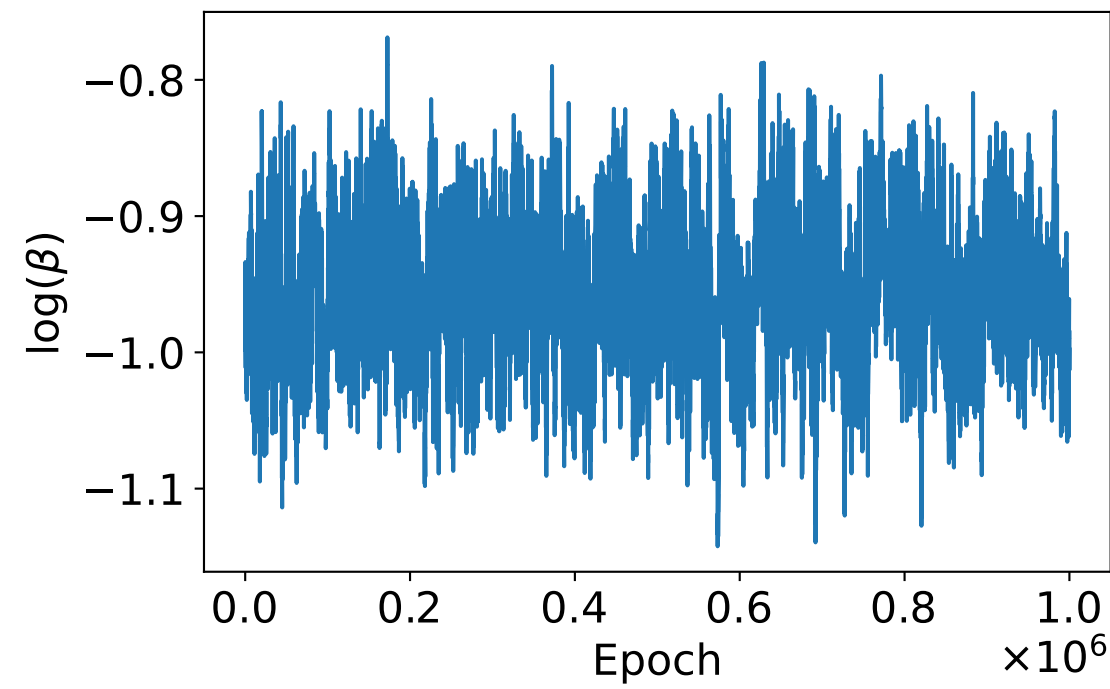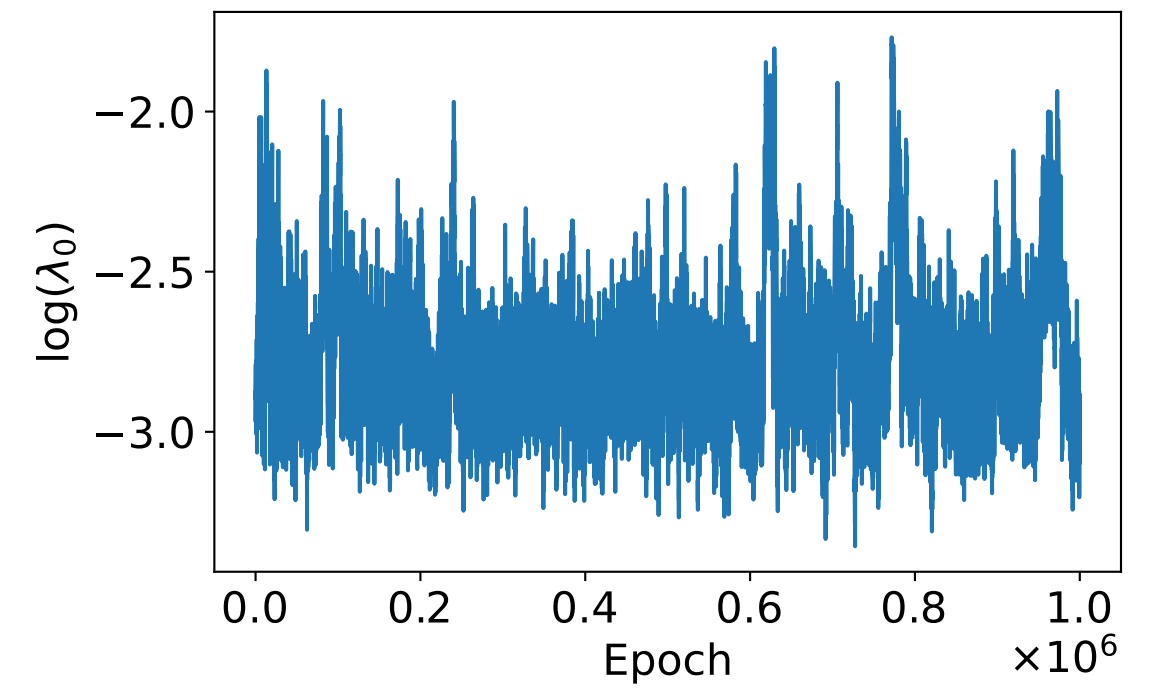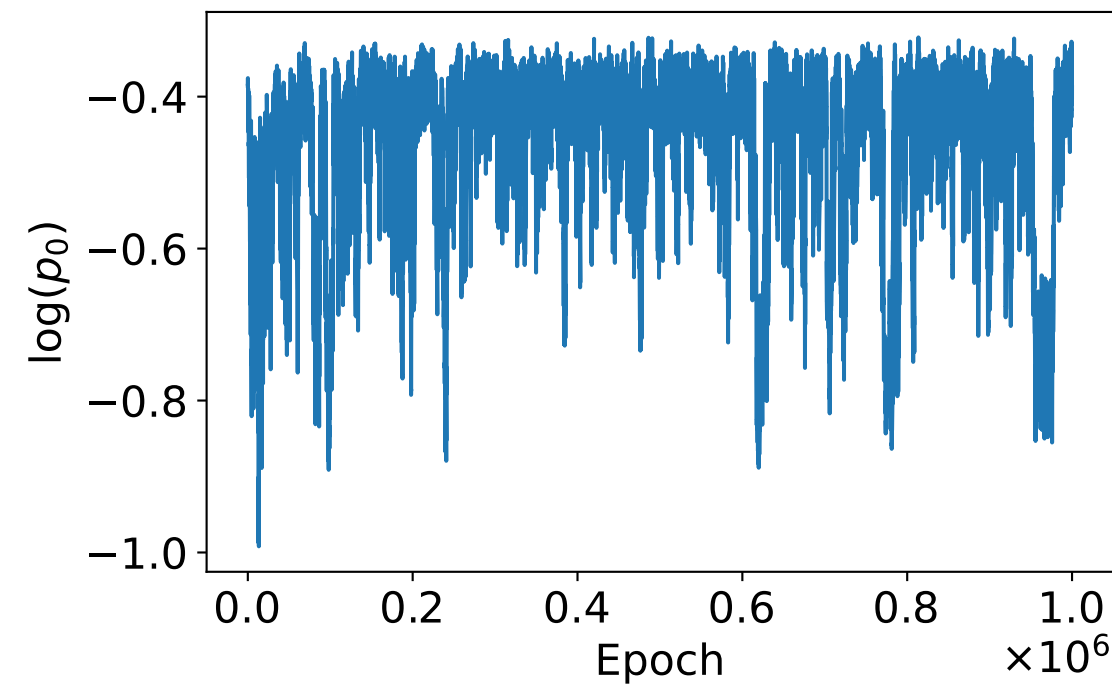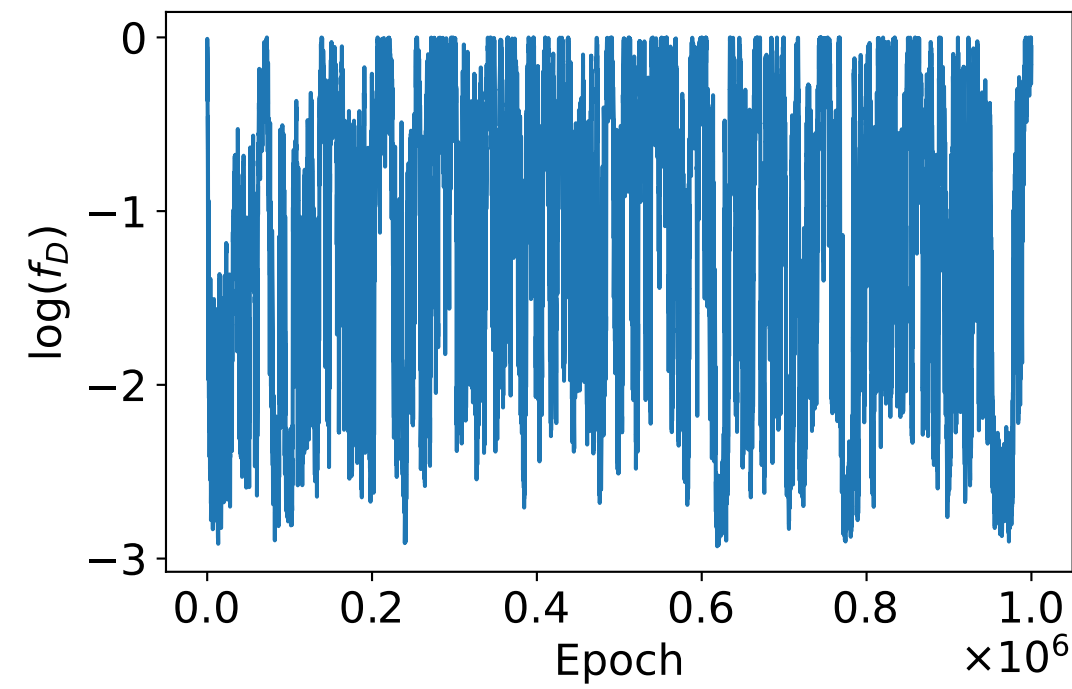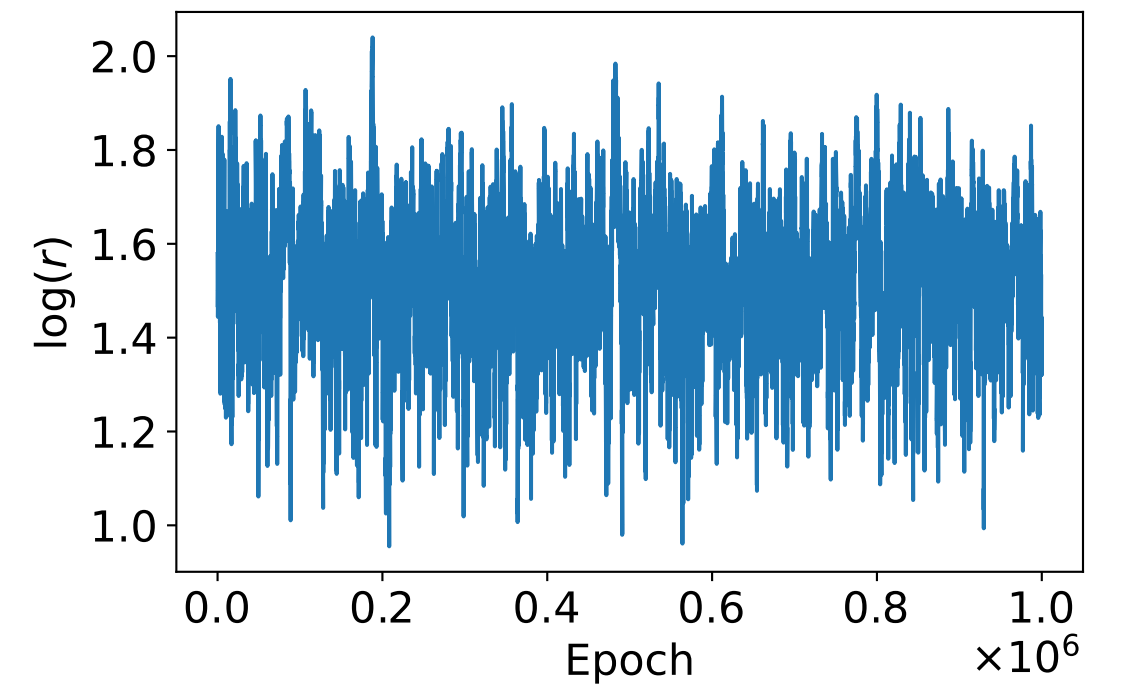



# Michigan

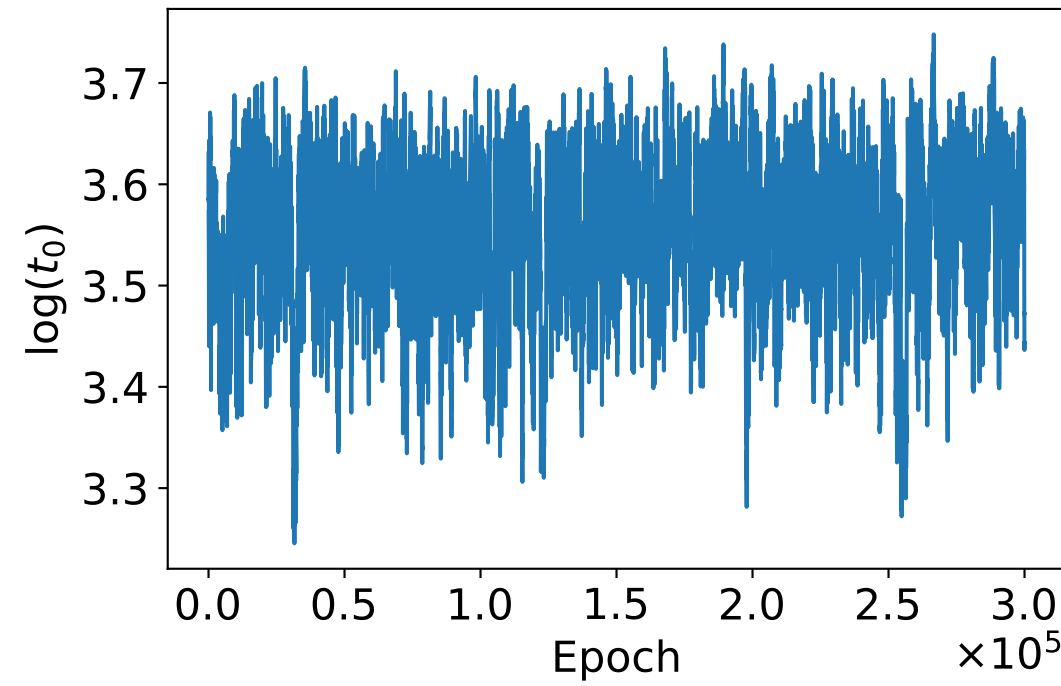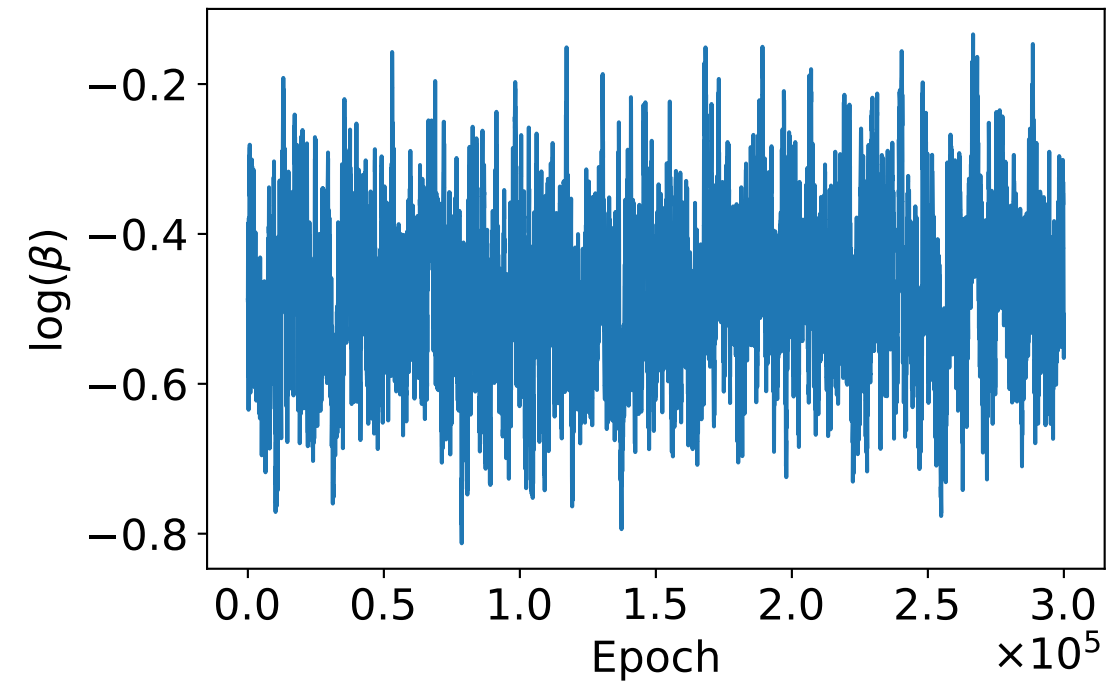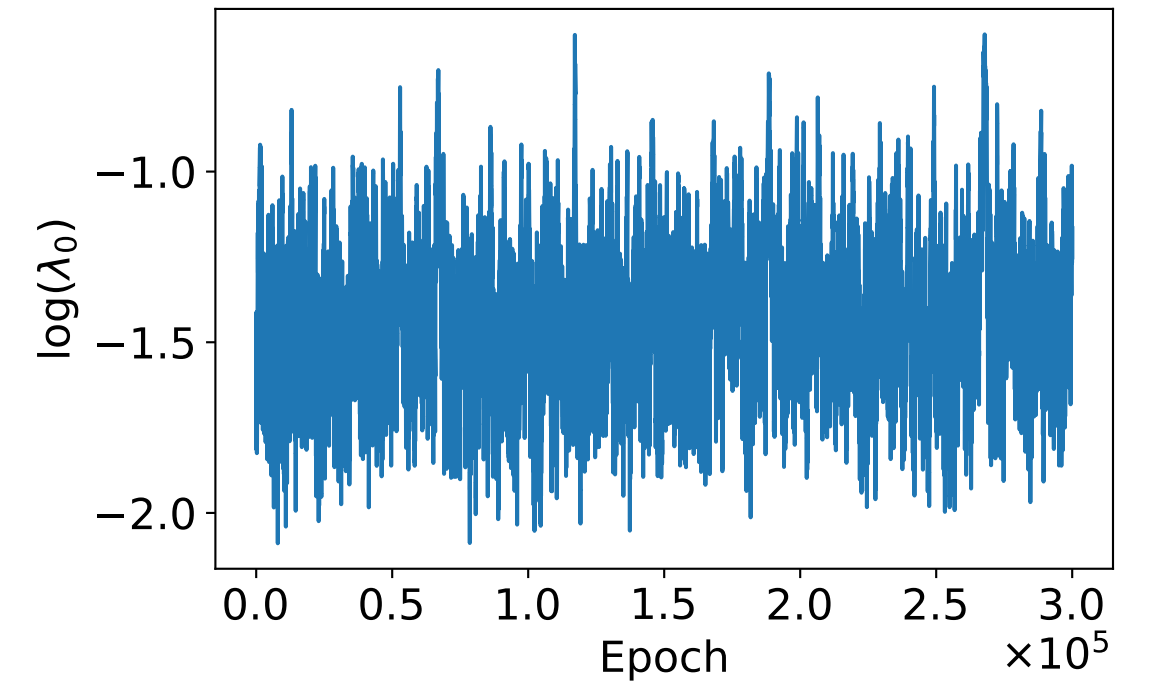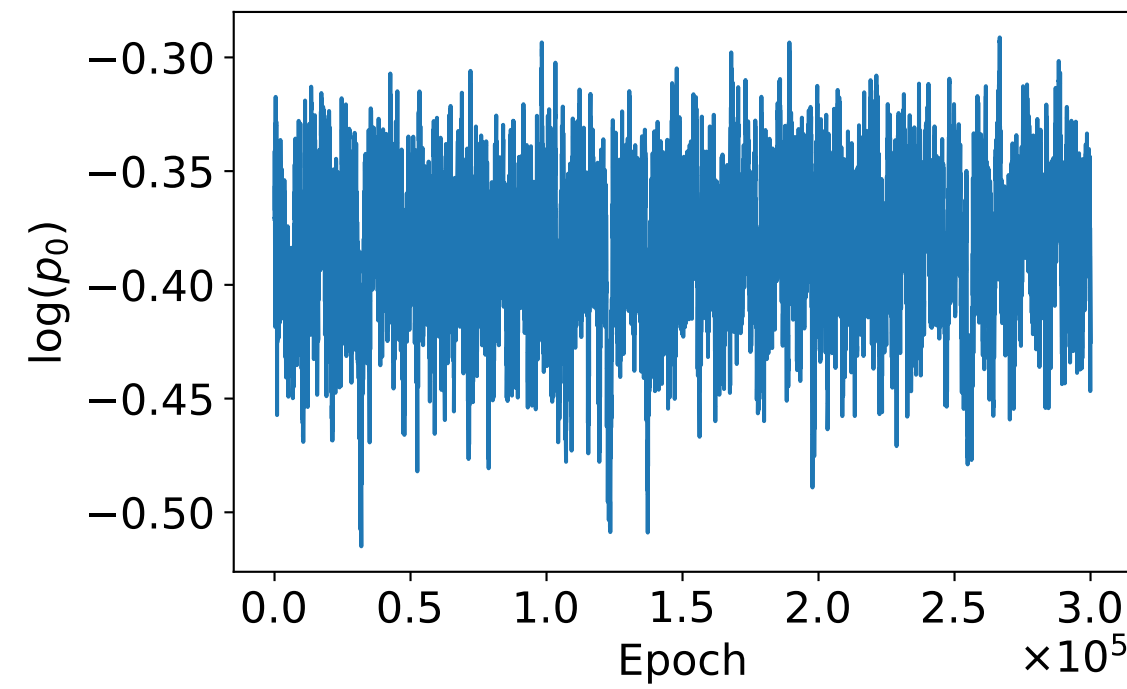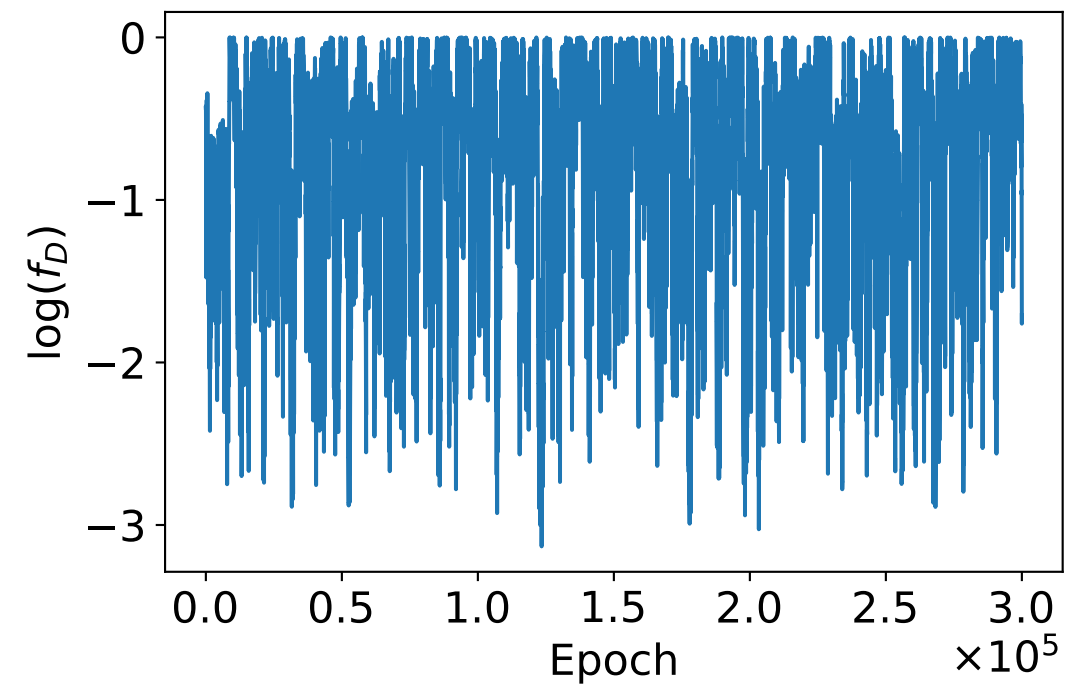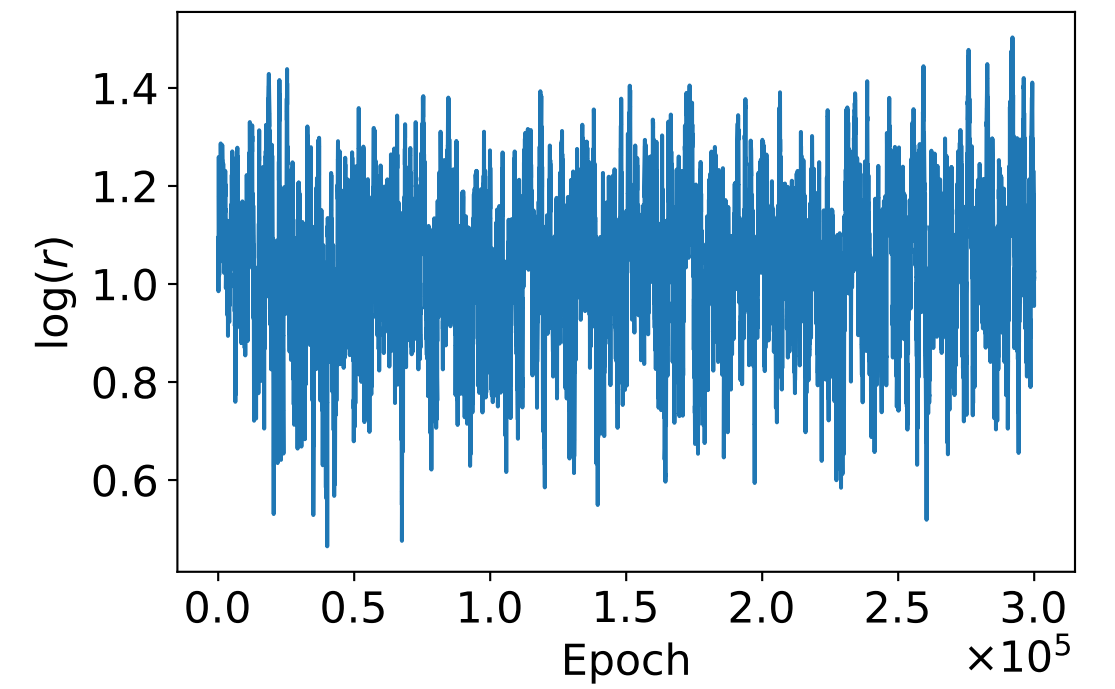

# Minnesota

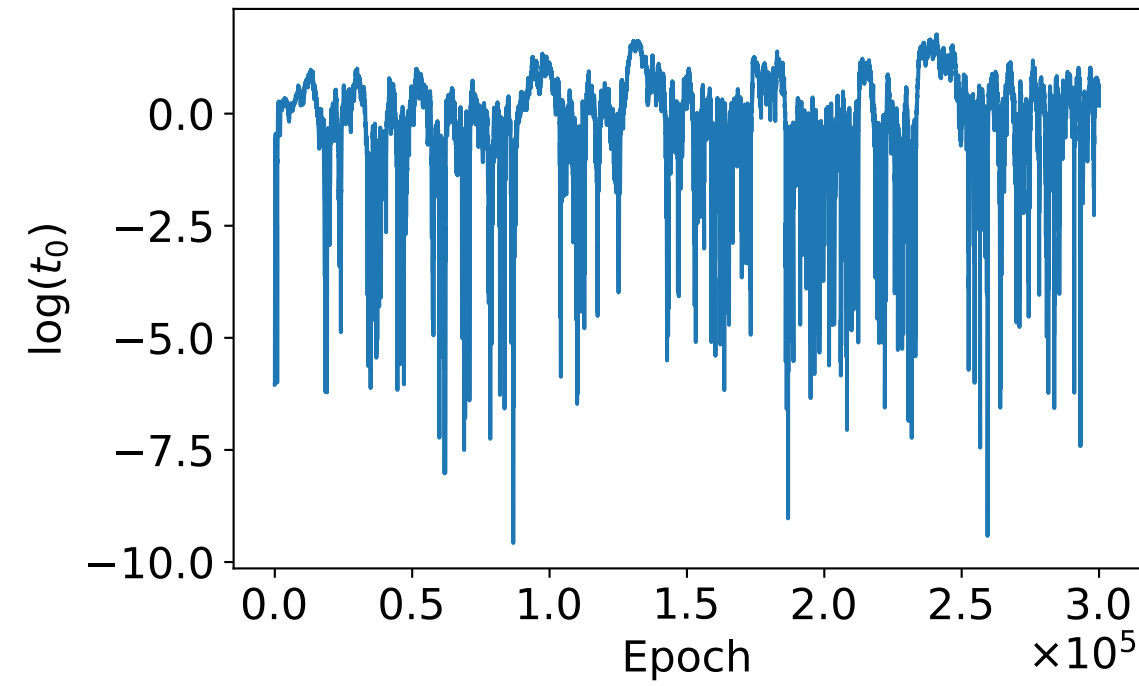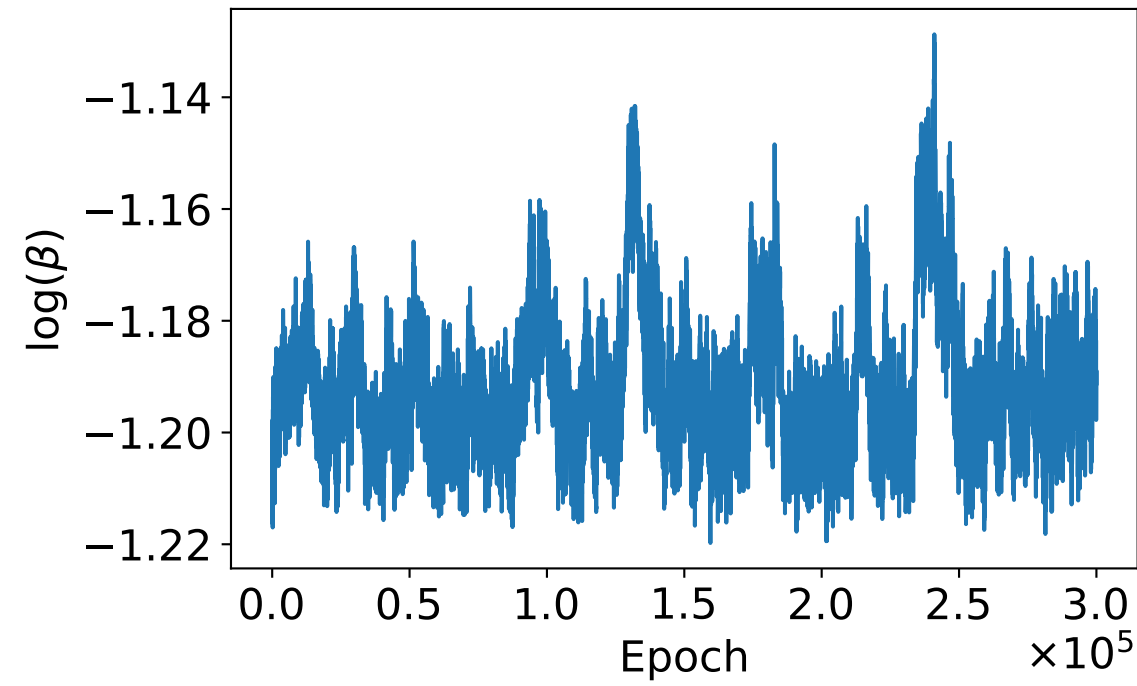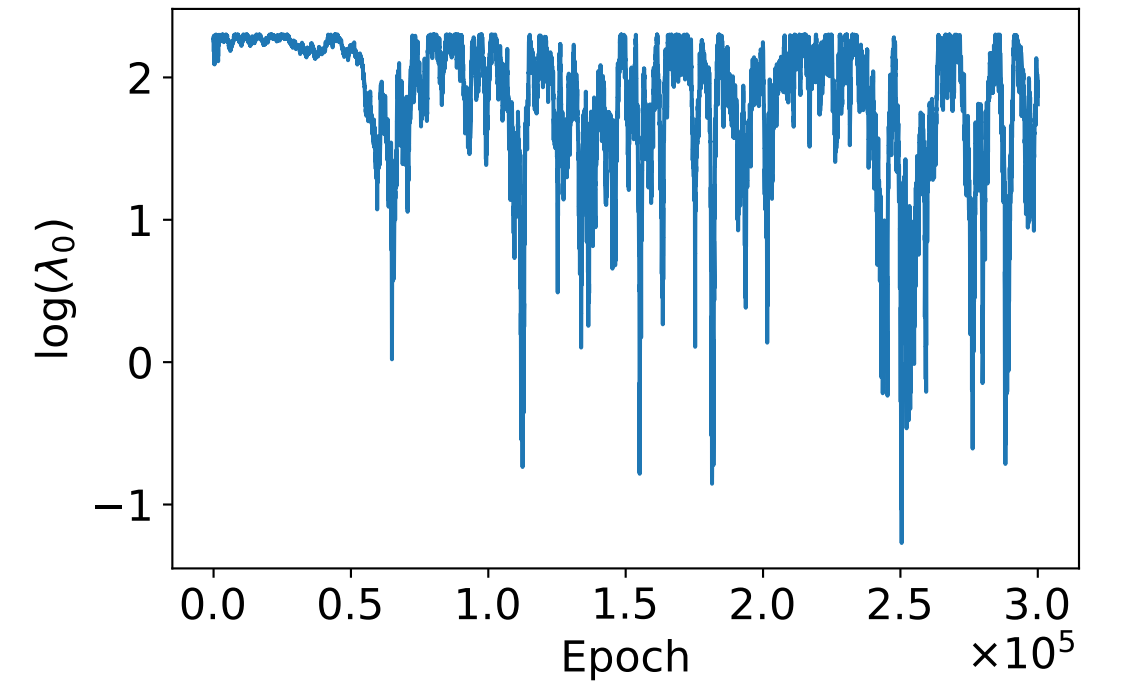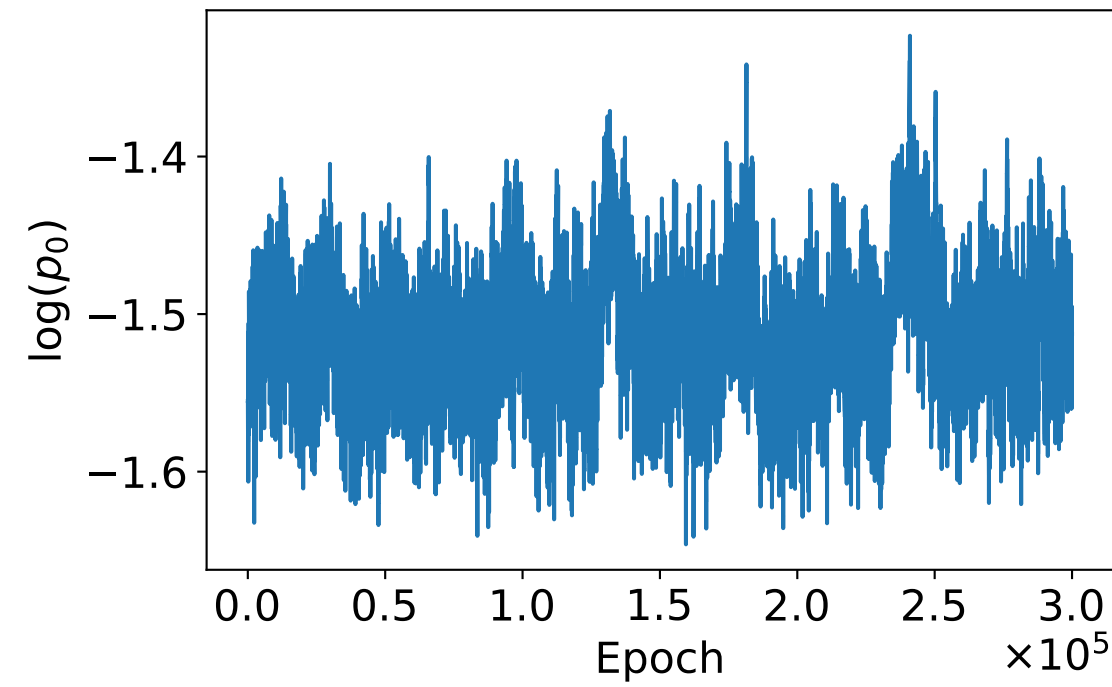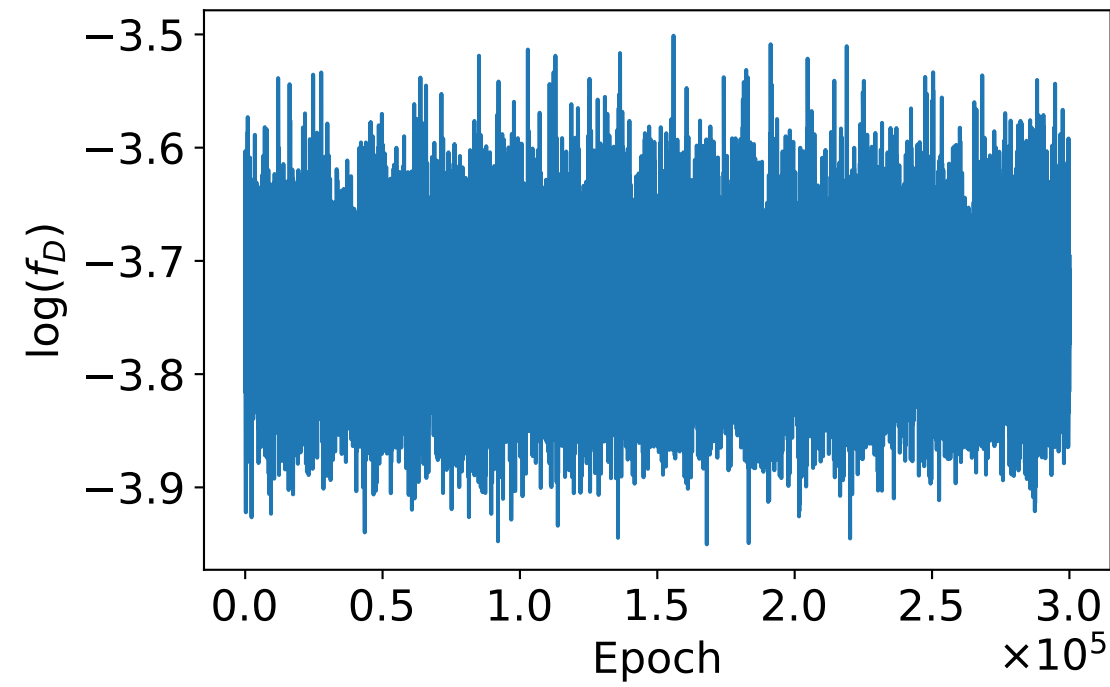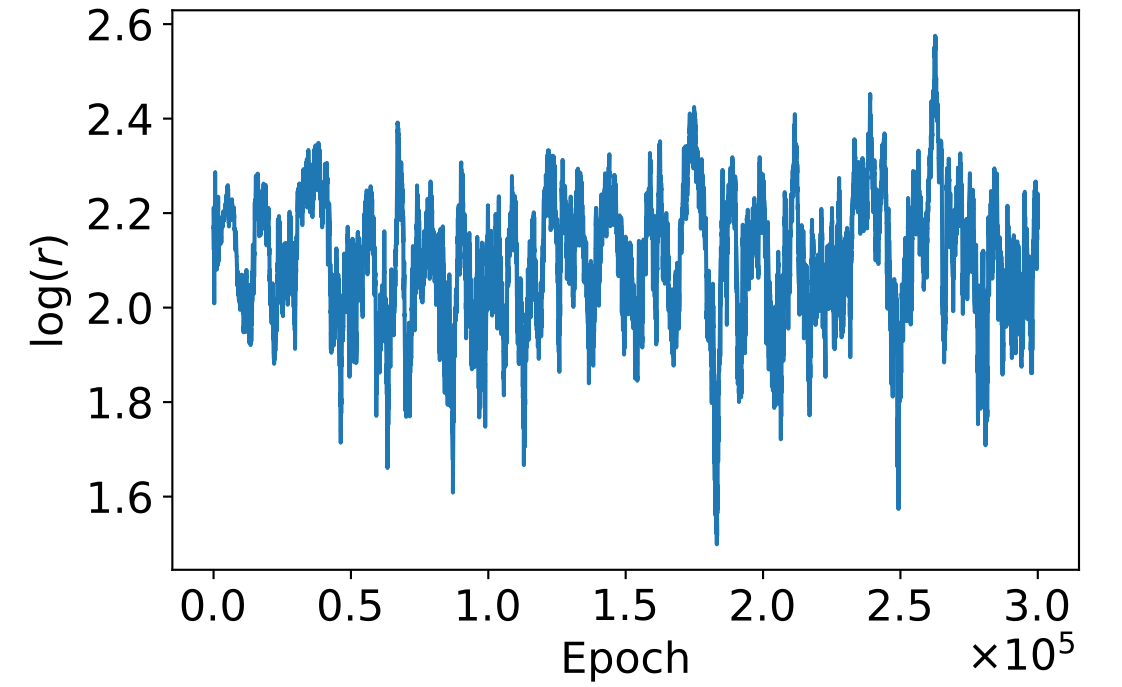

# Mississippi

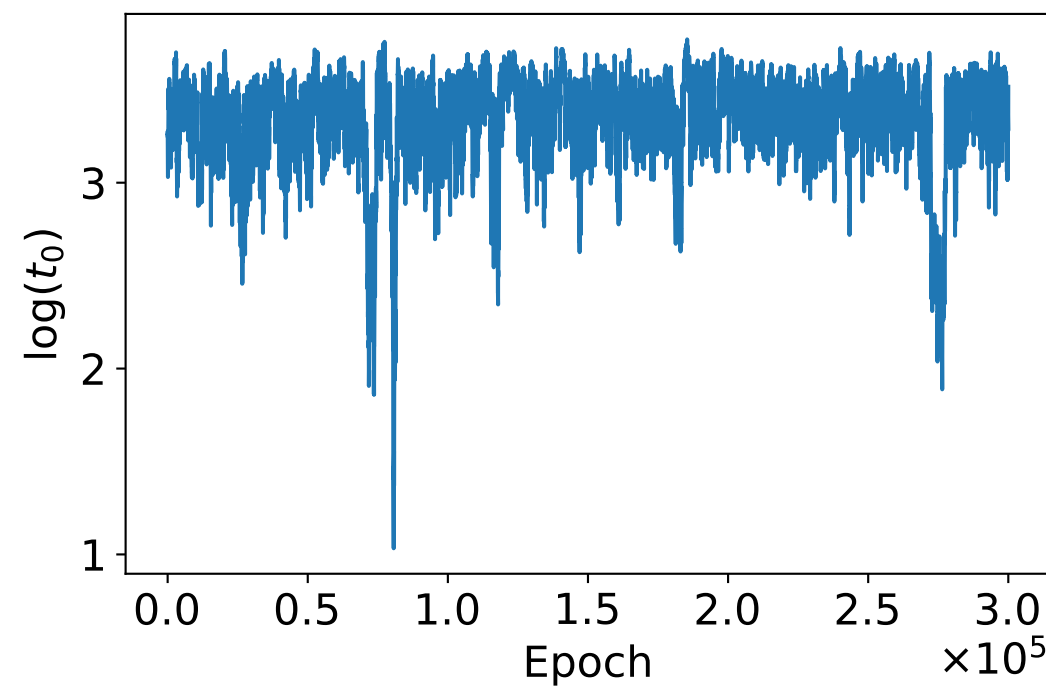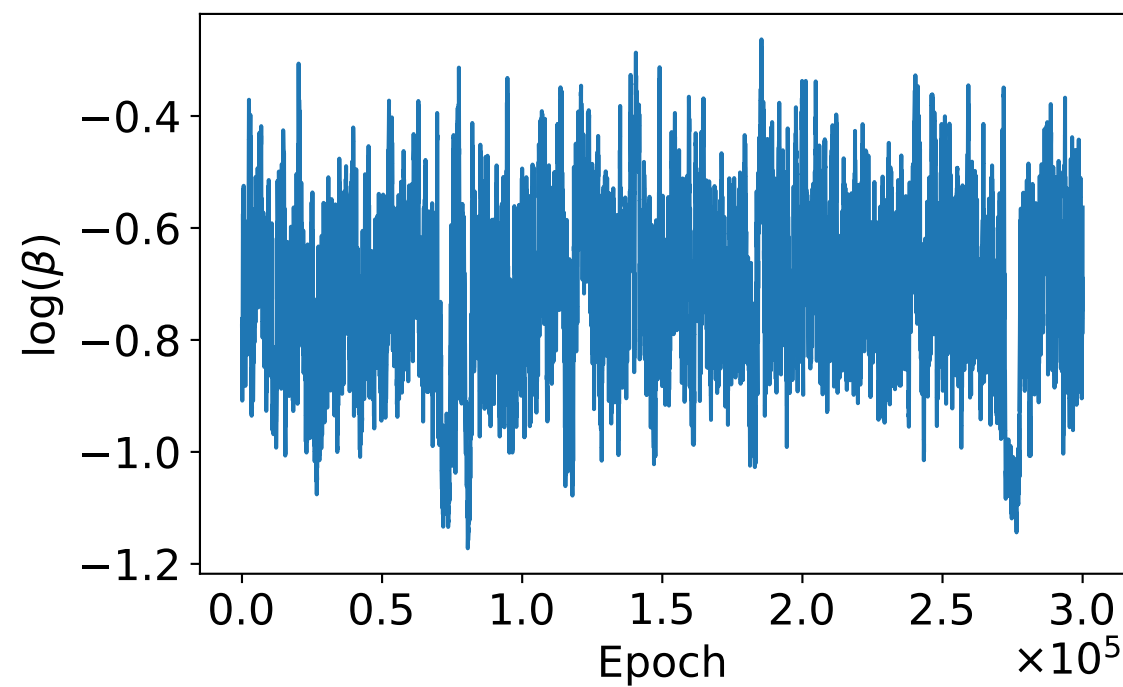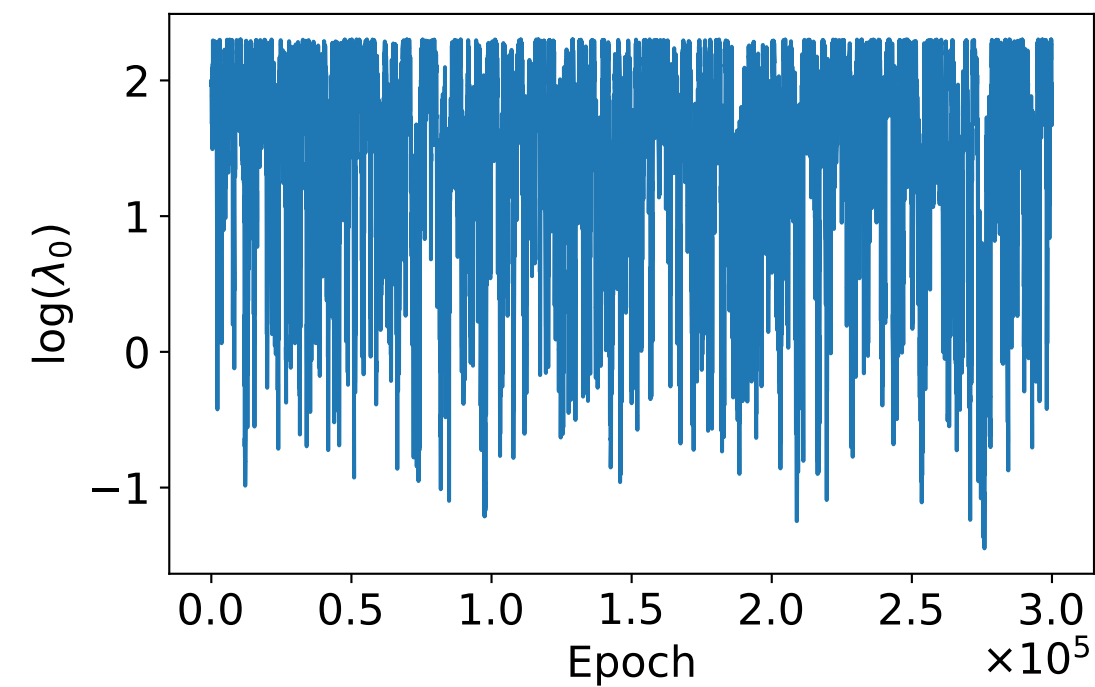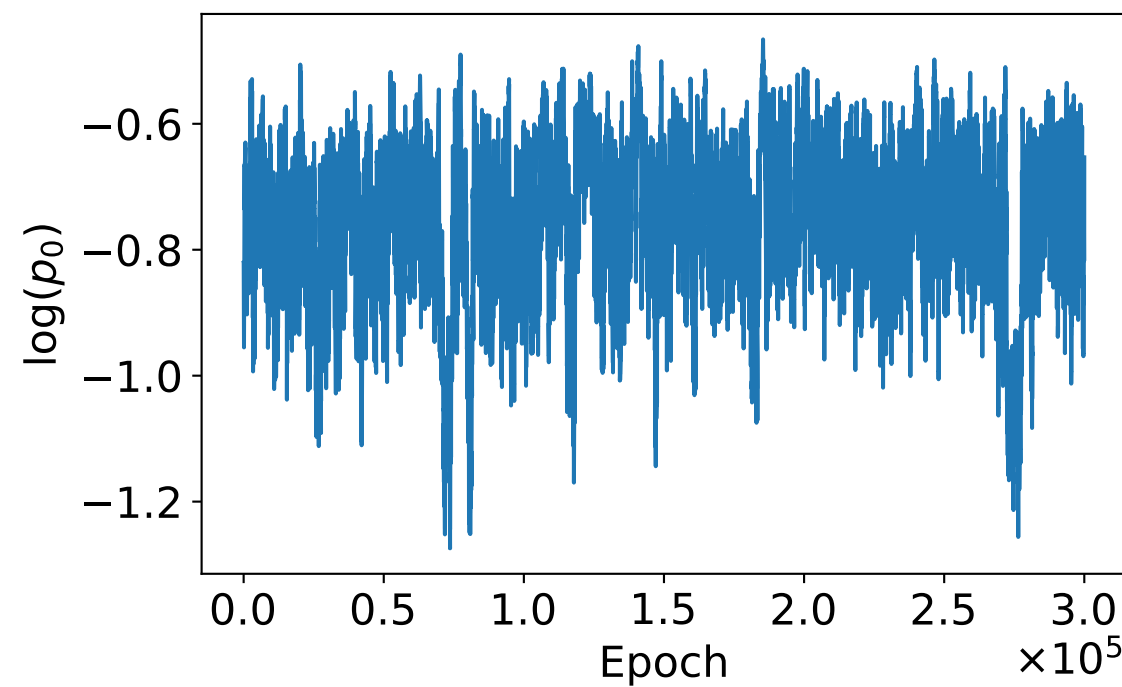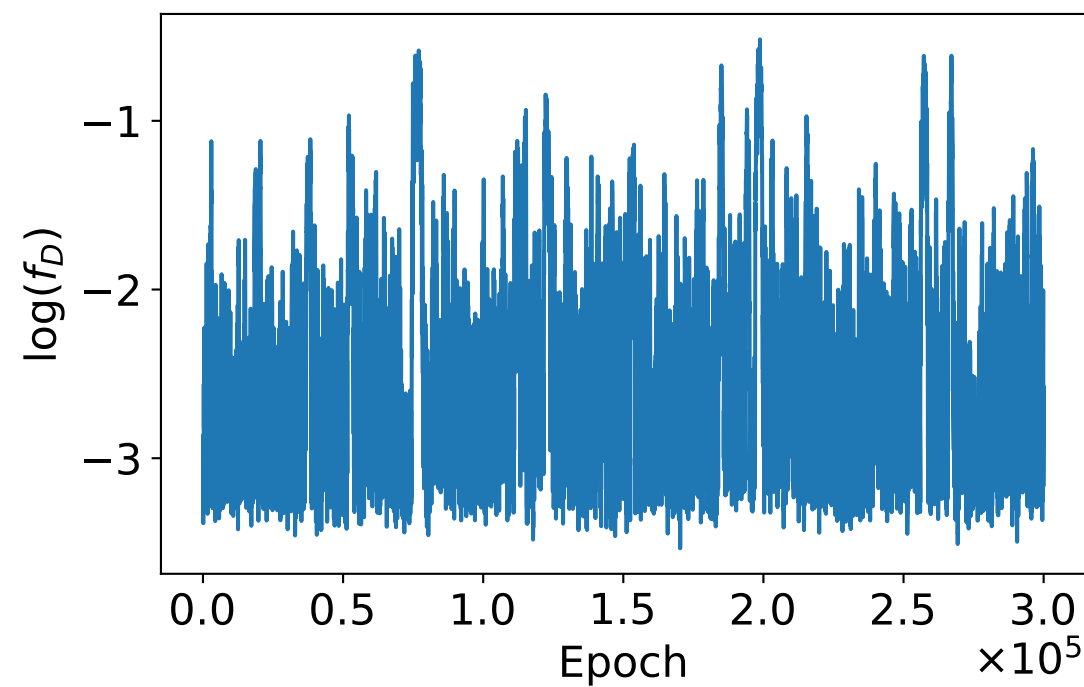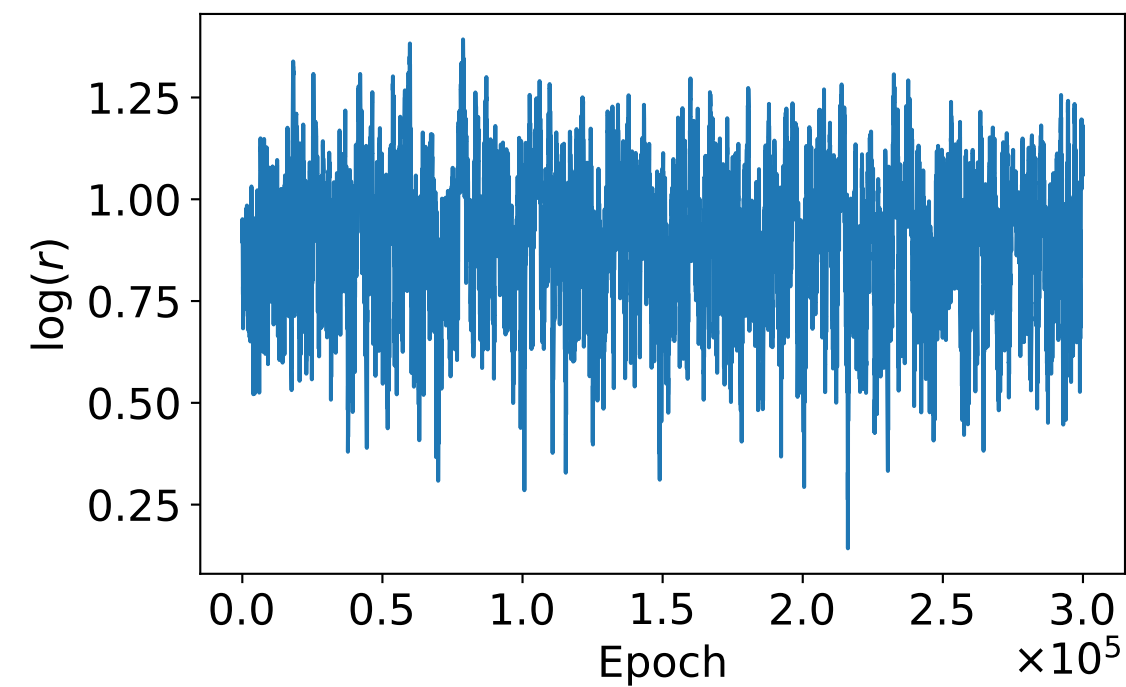

# Missouri

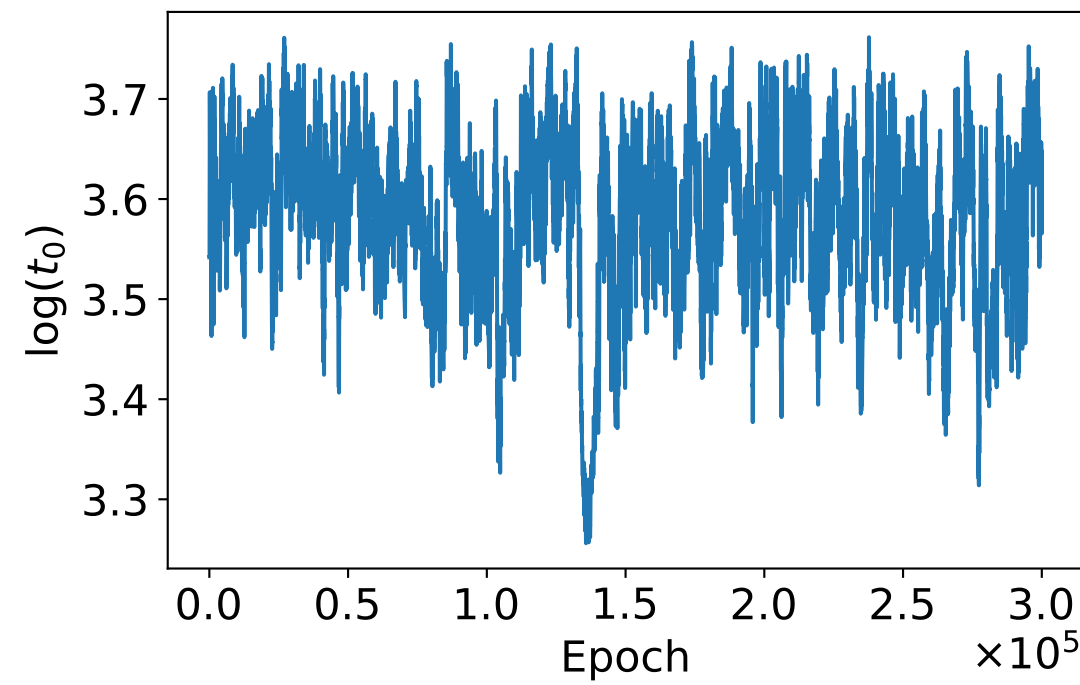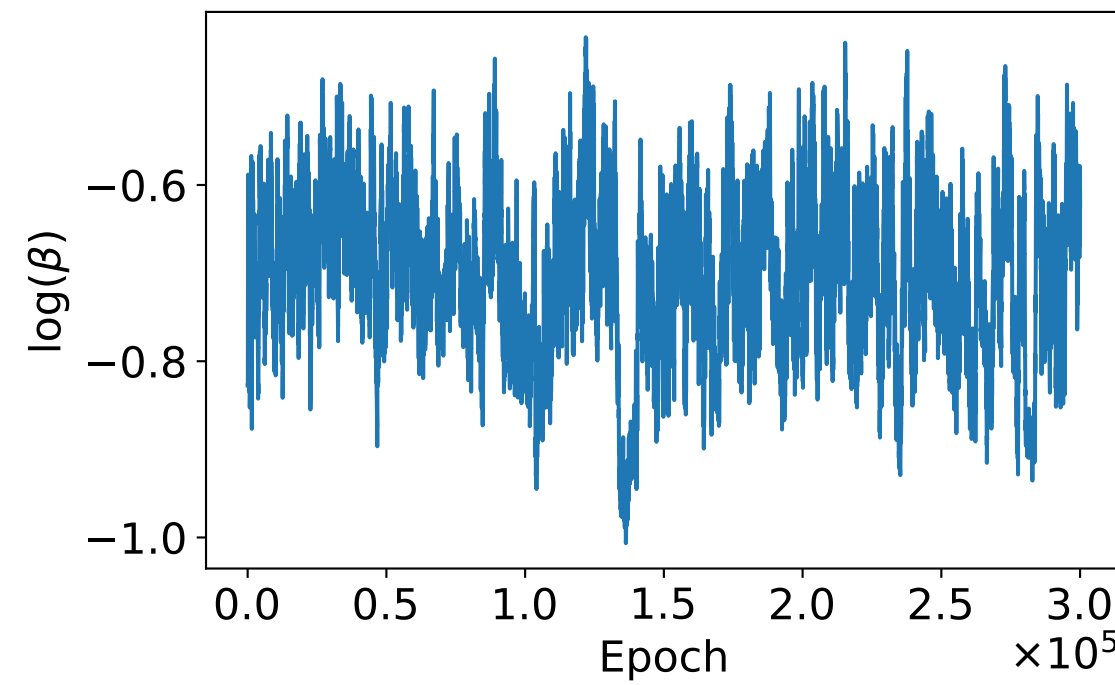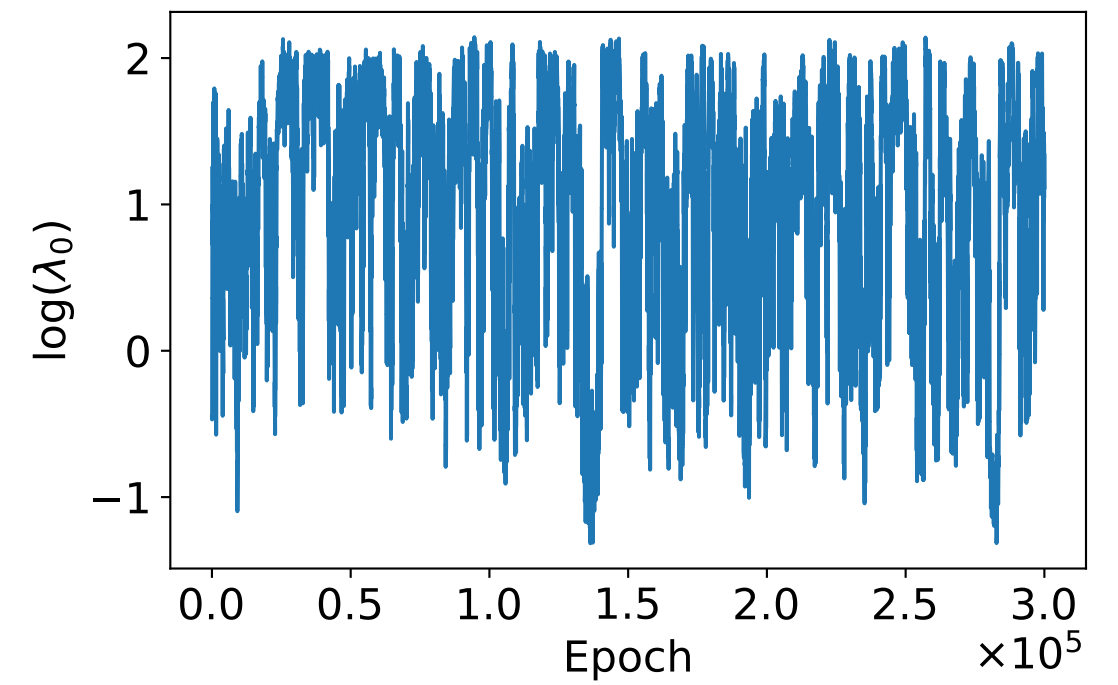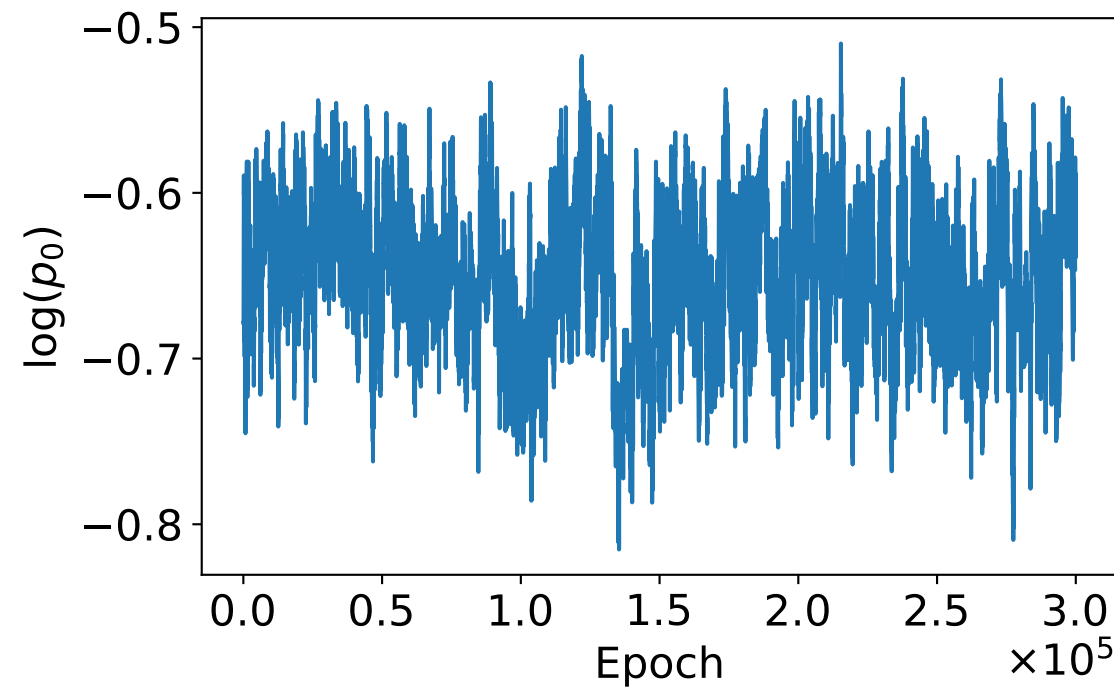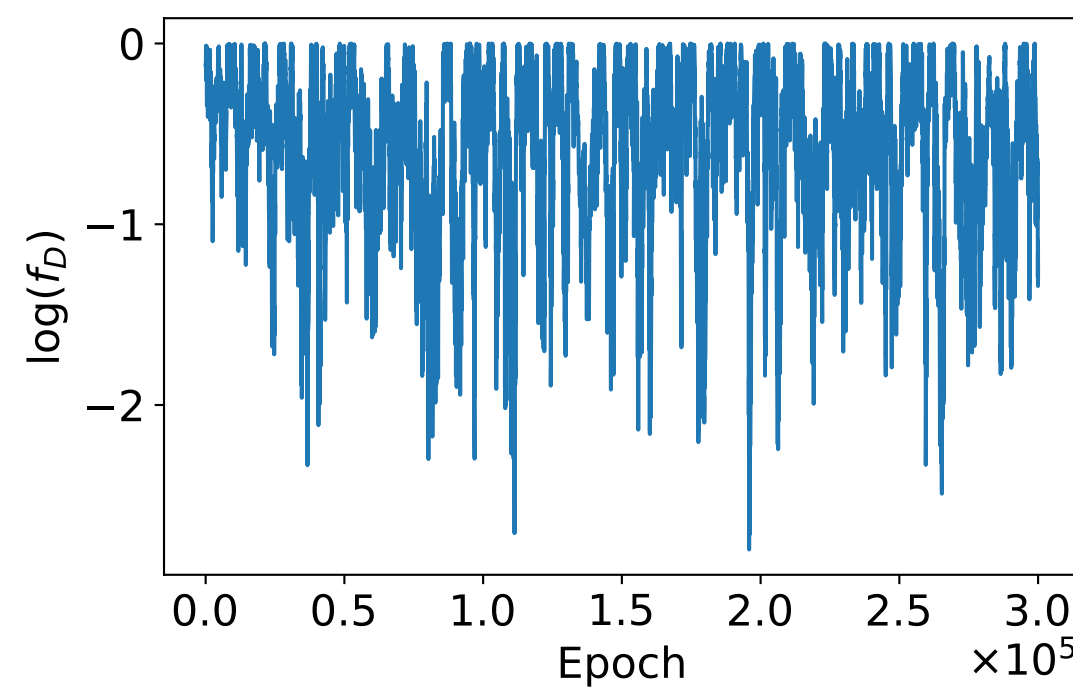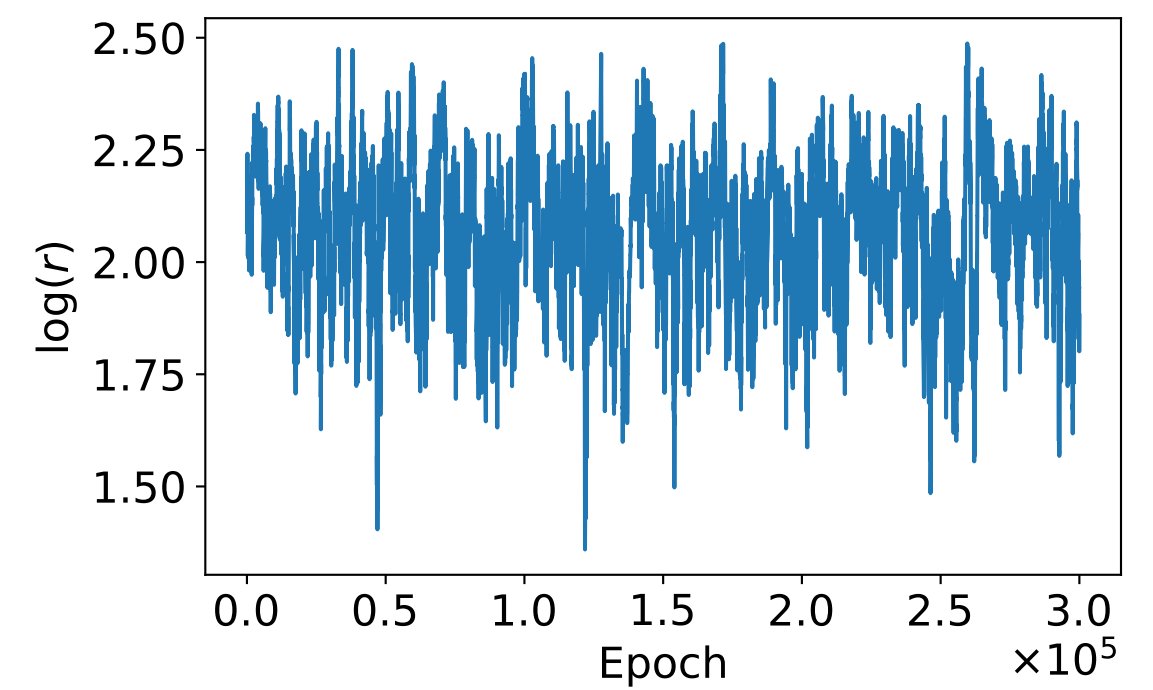

# Montana

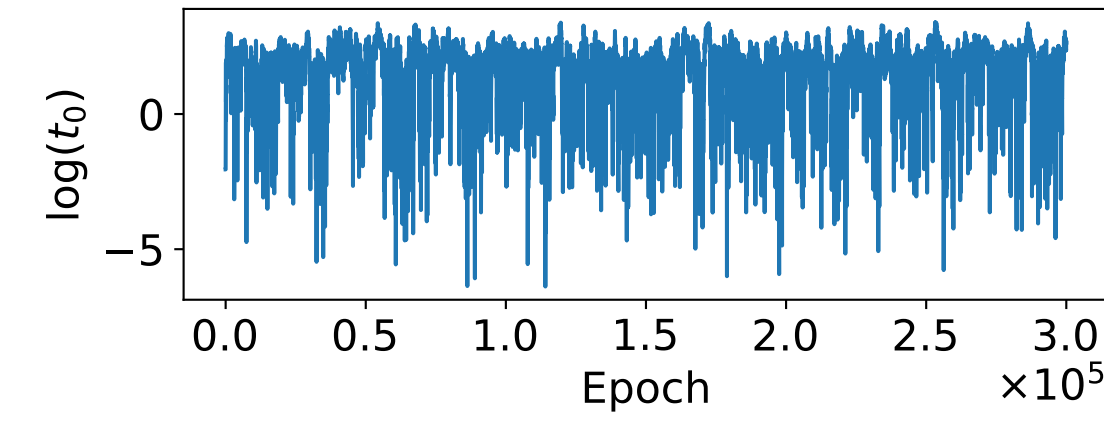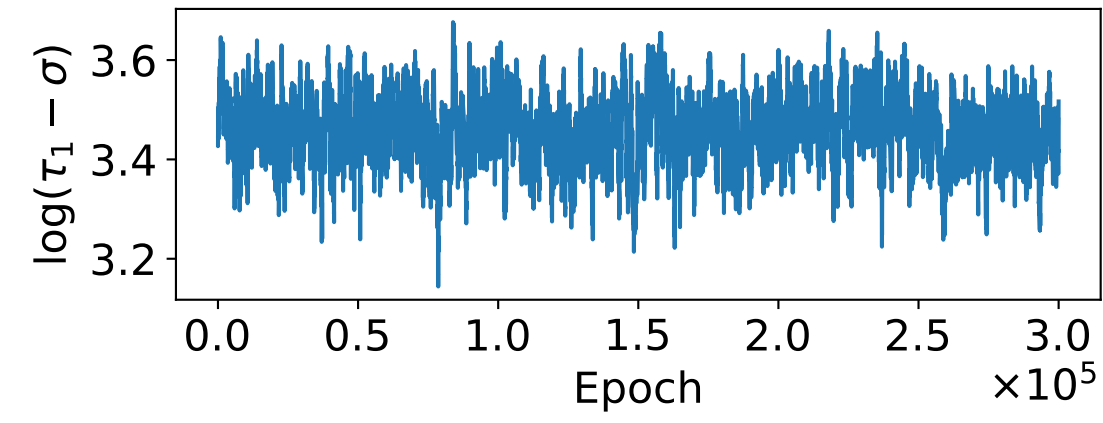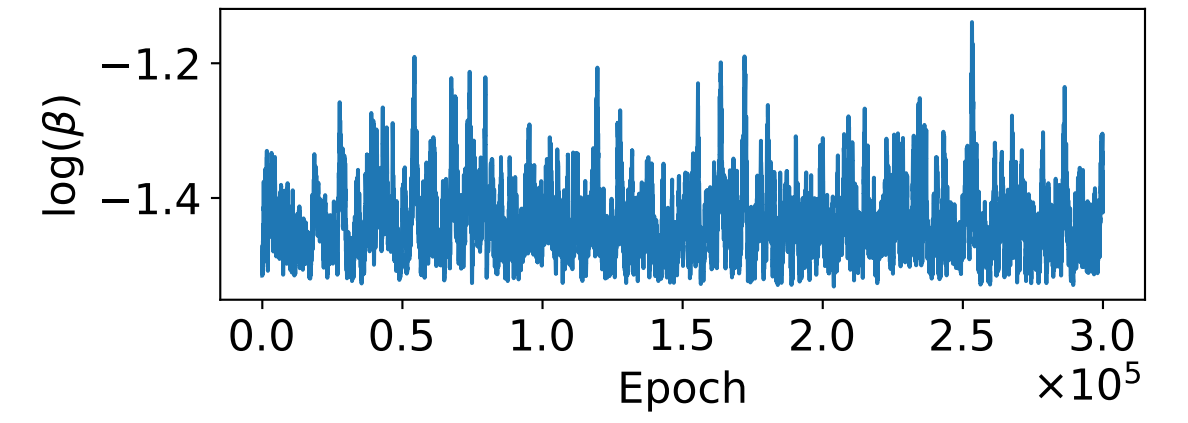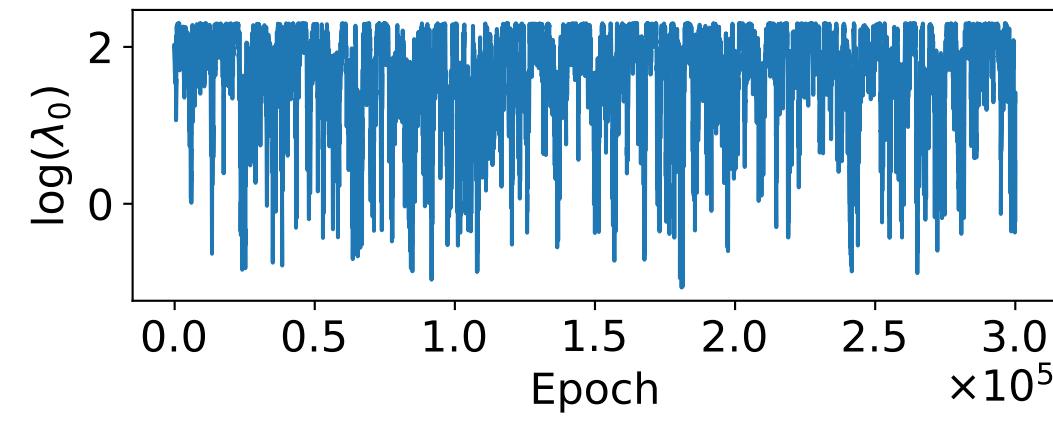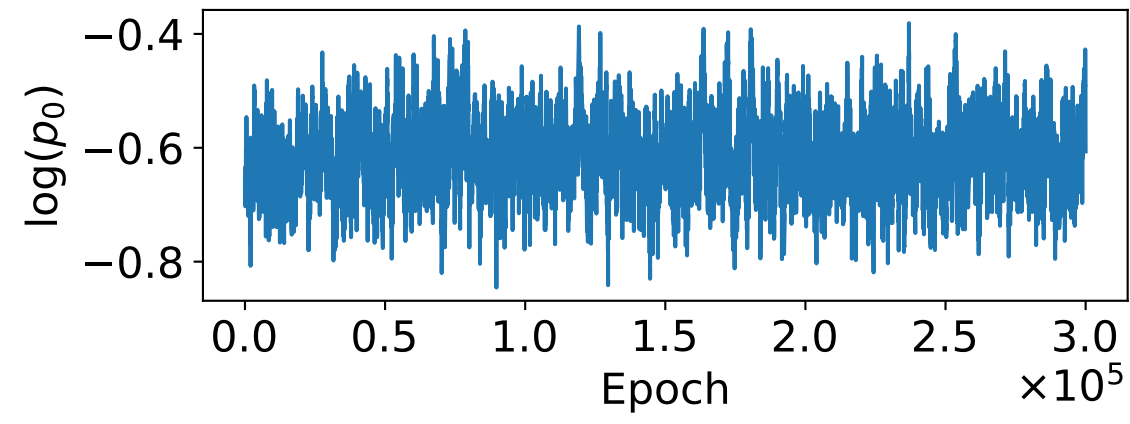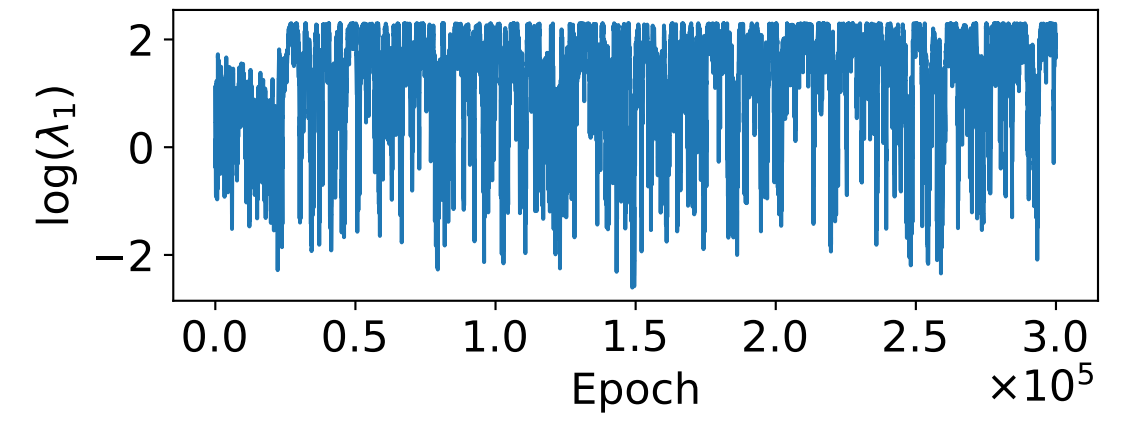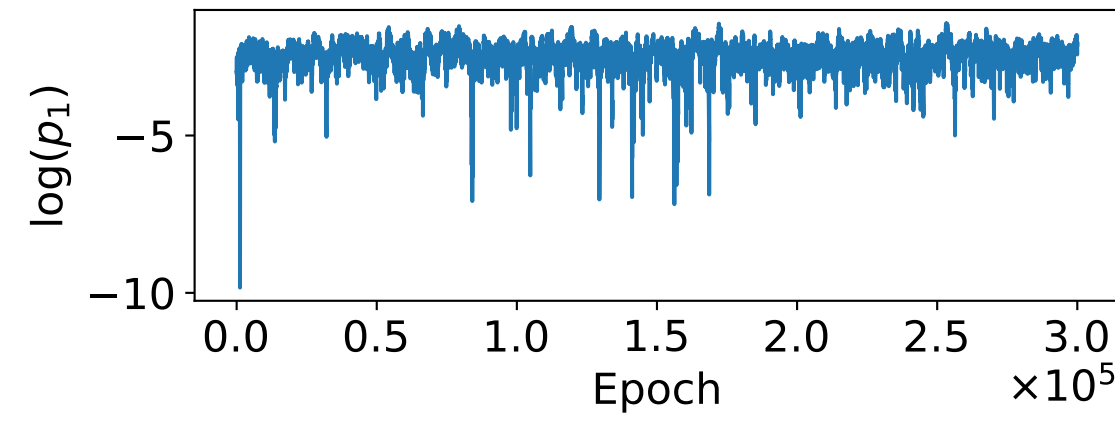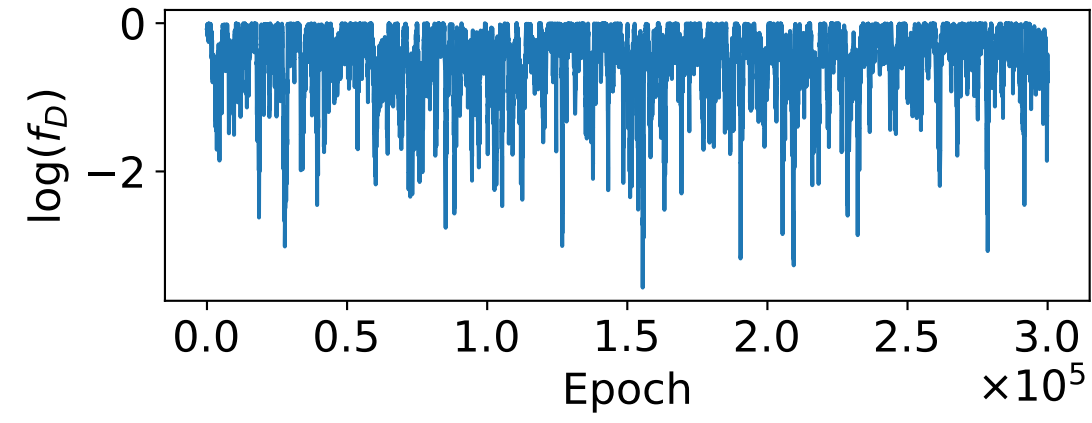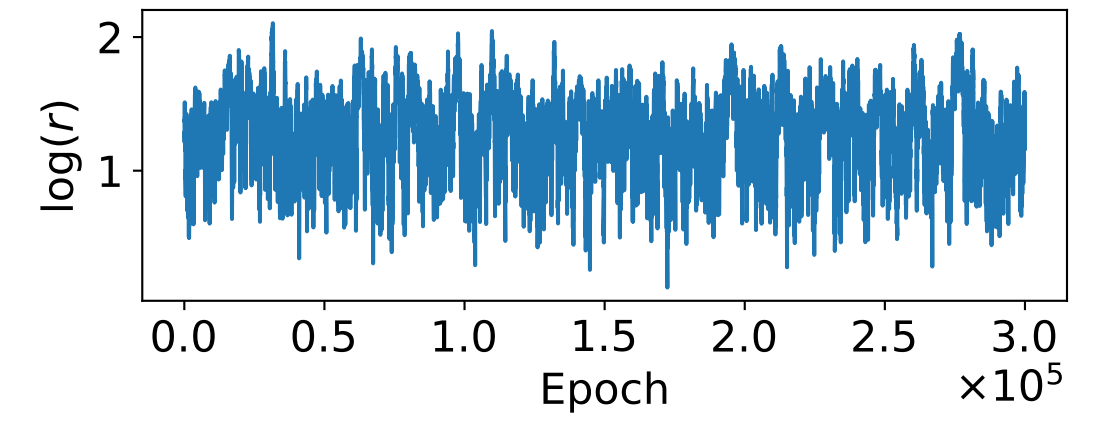

# Nebraska

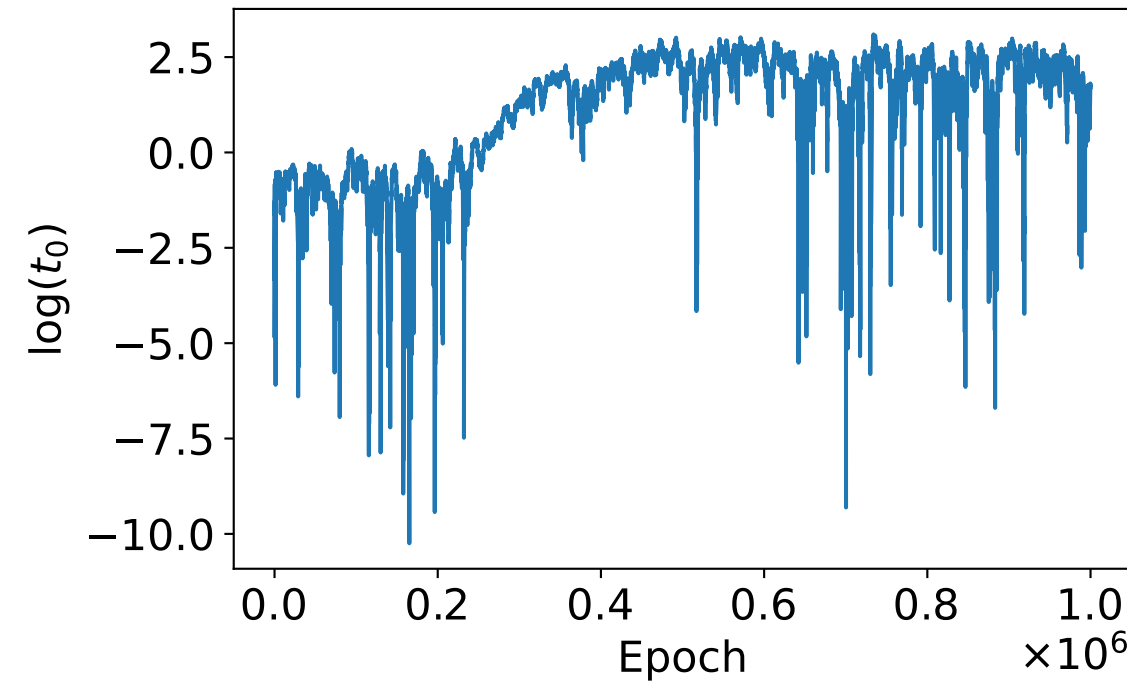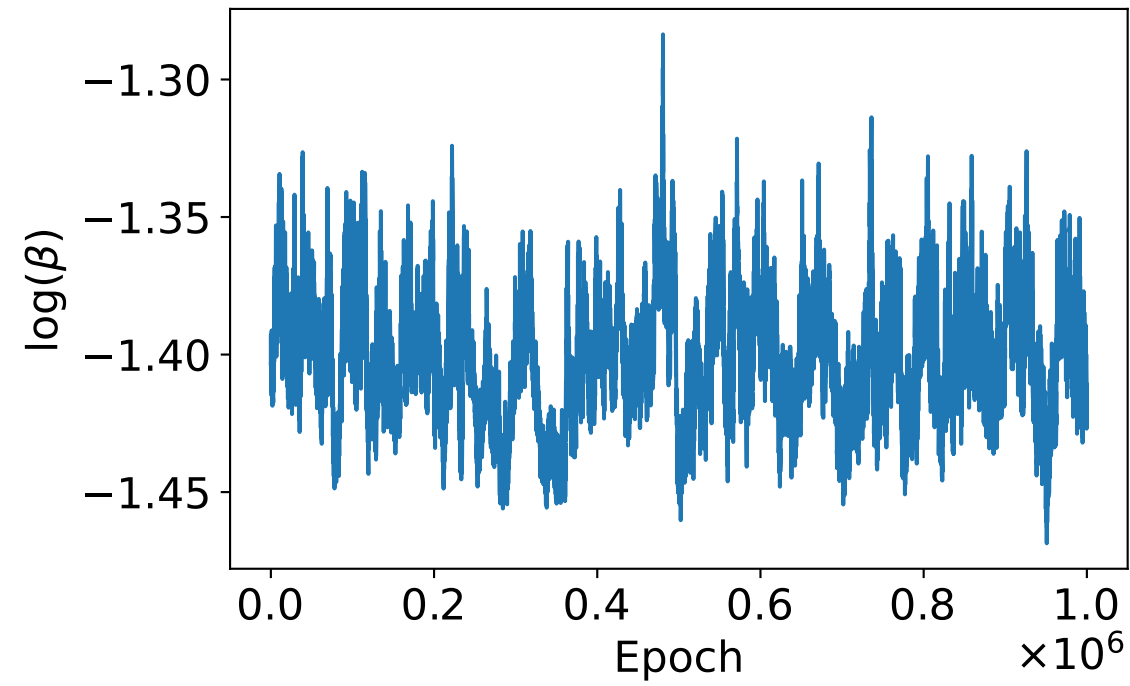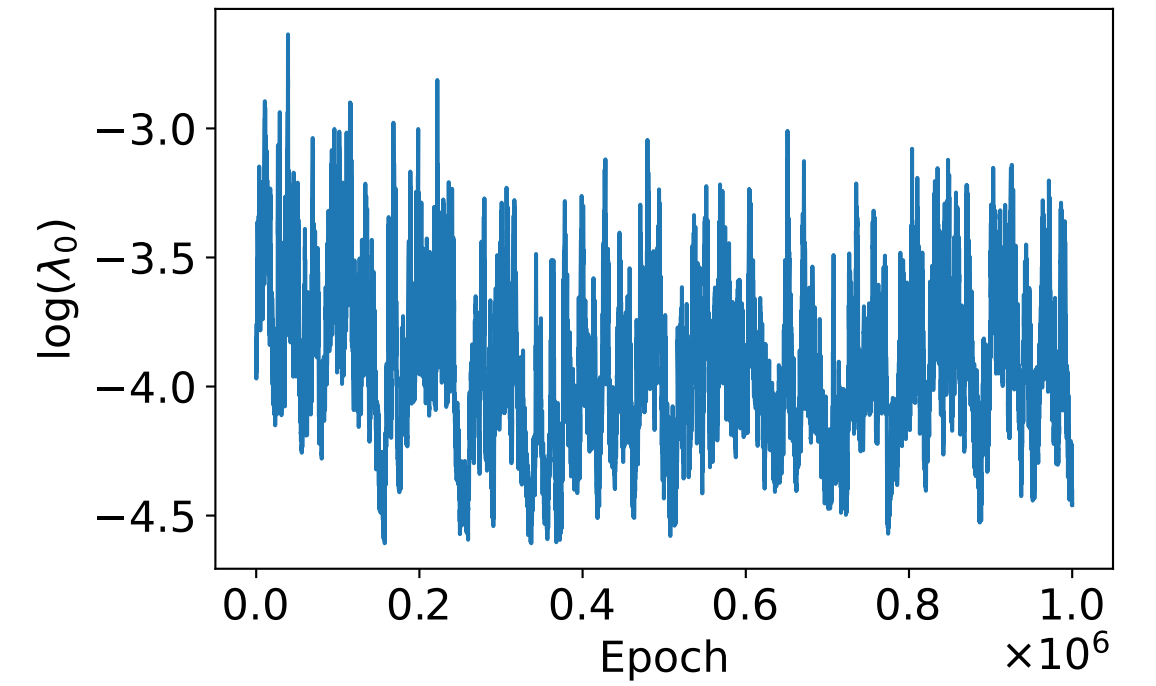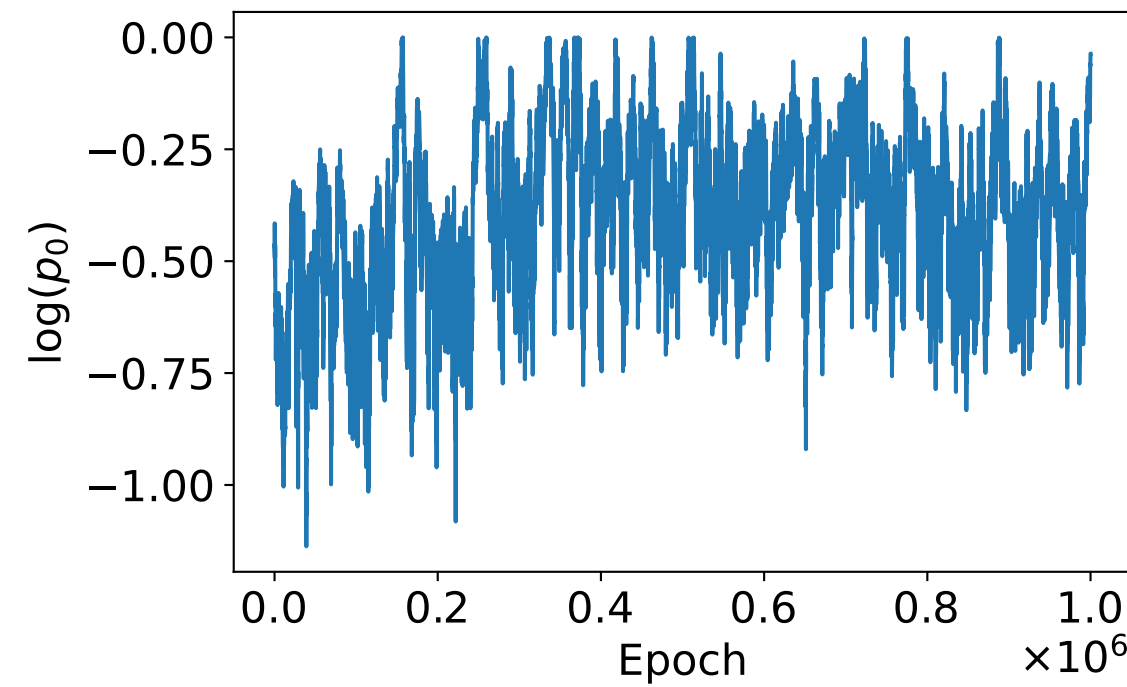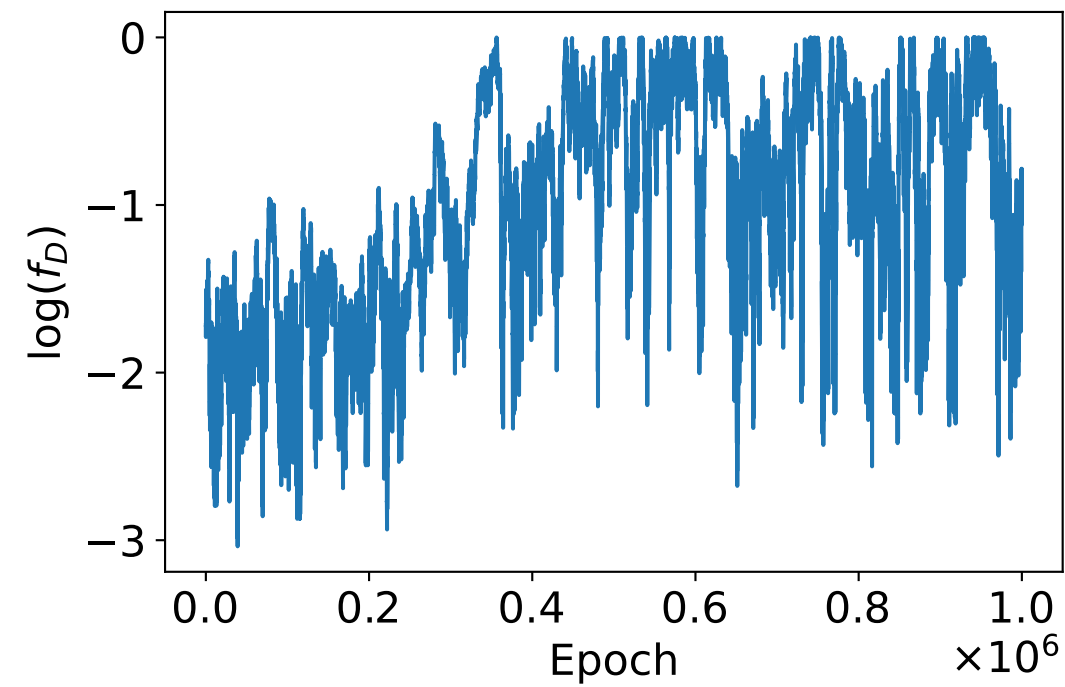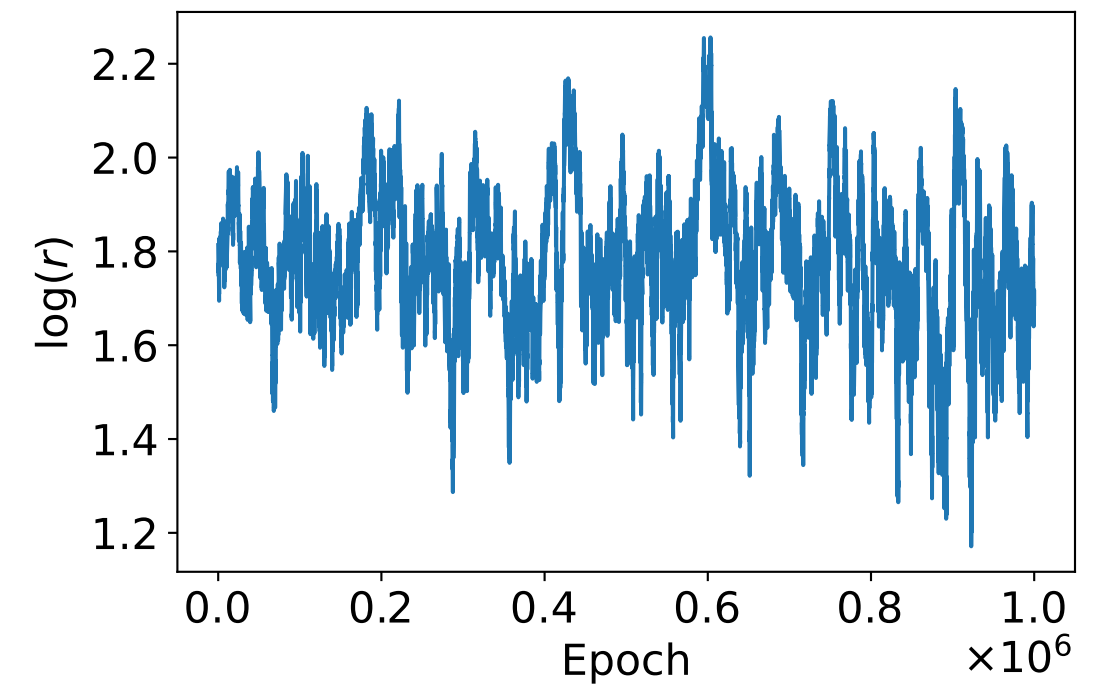

# Nevada

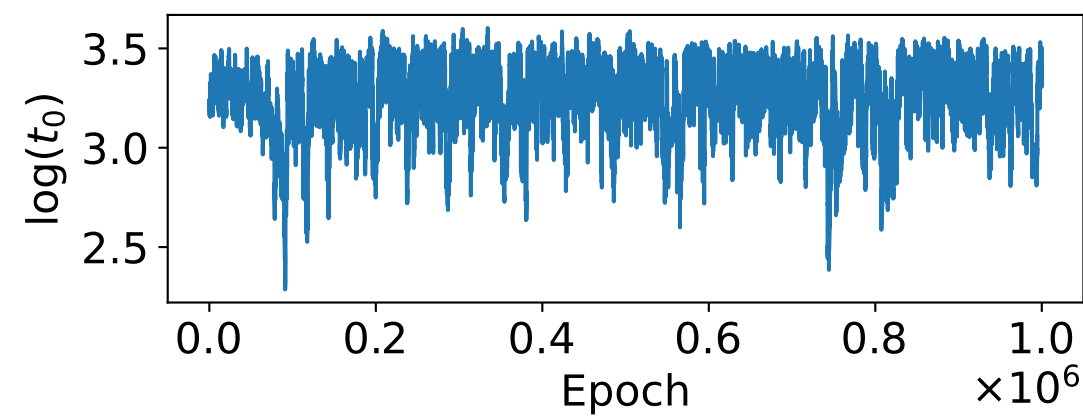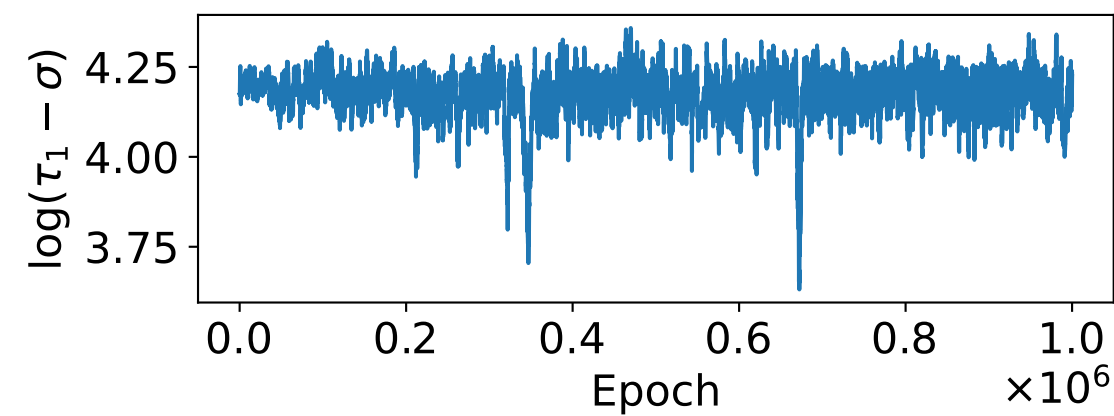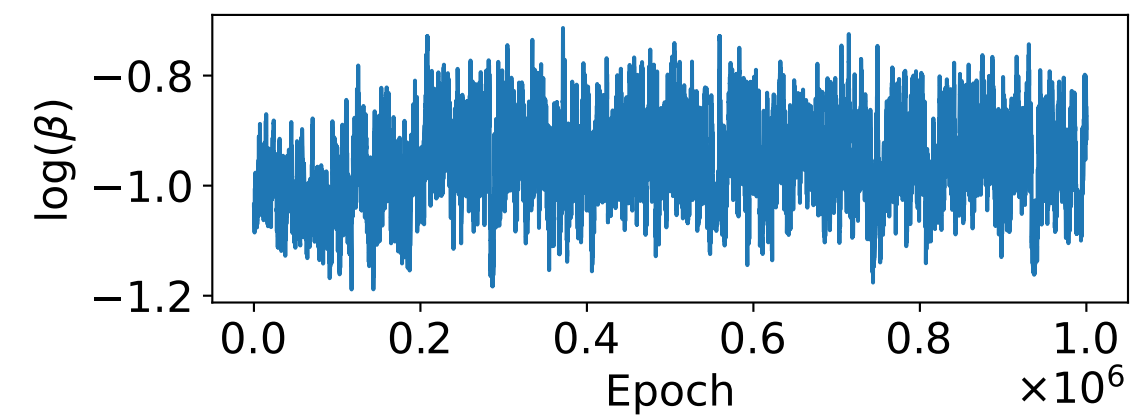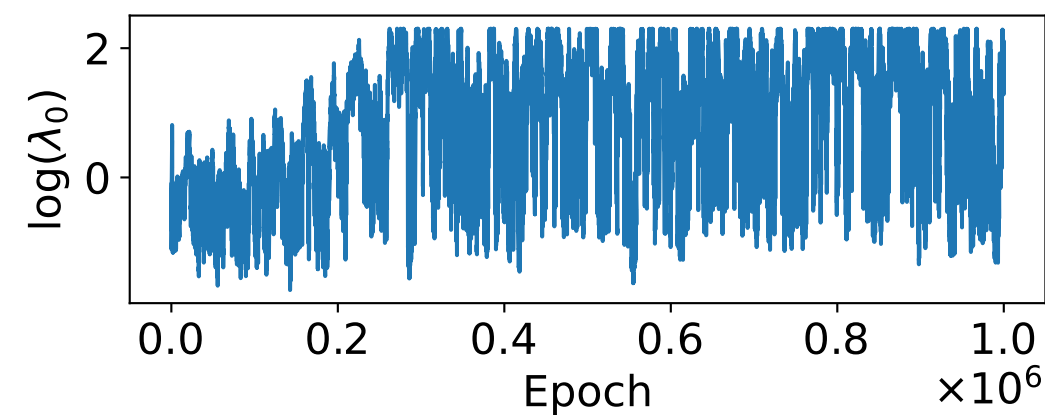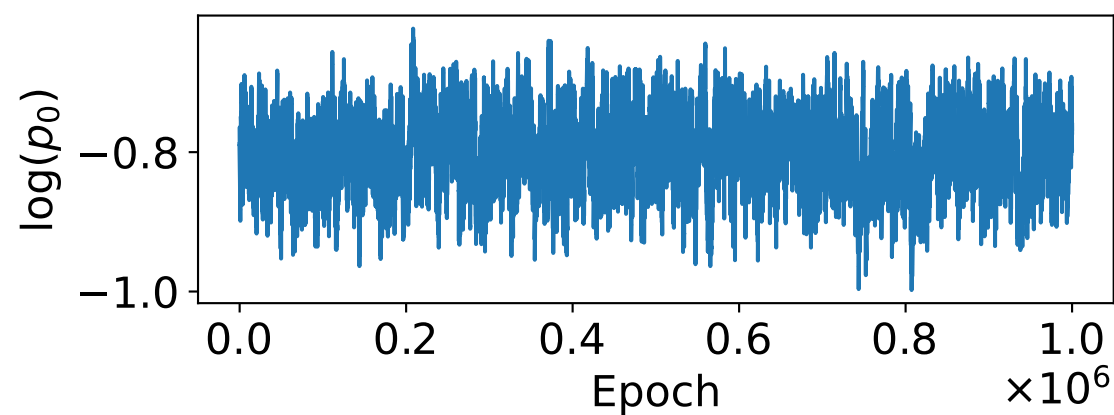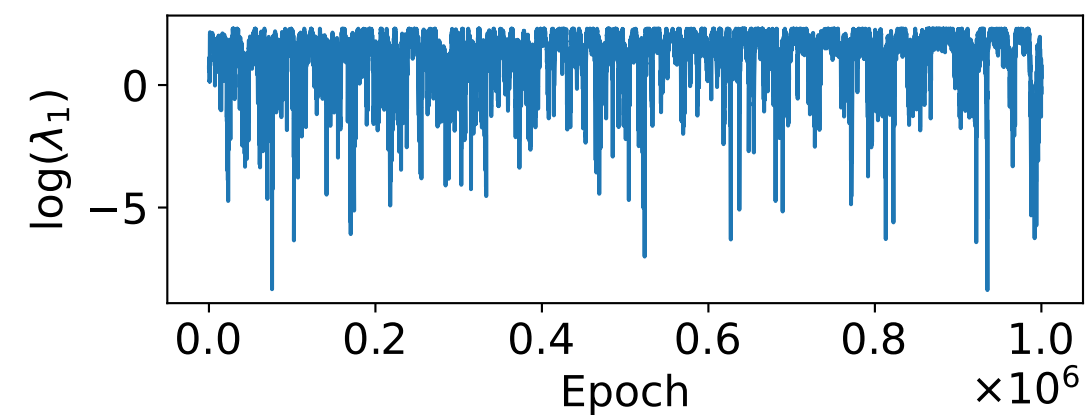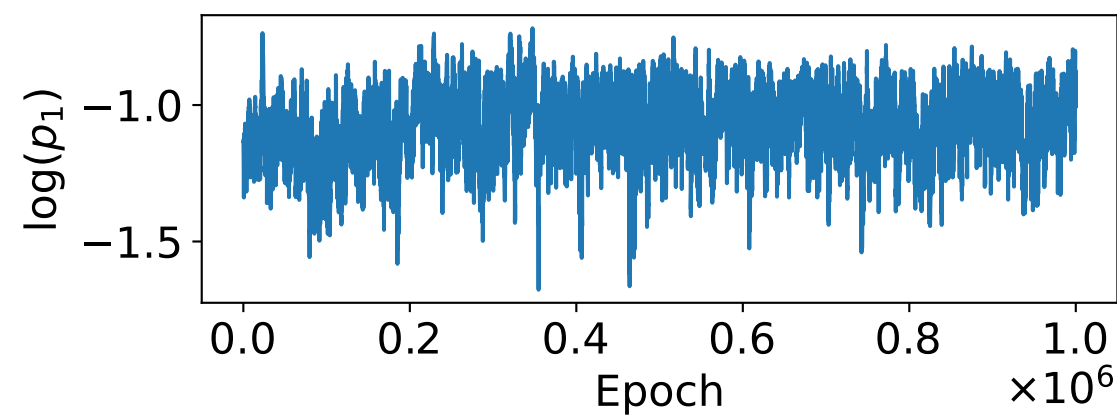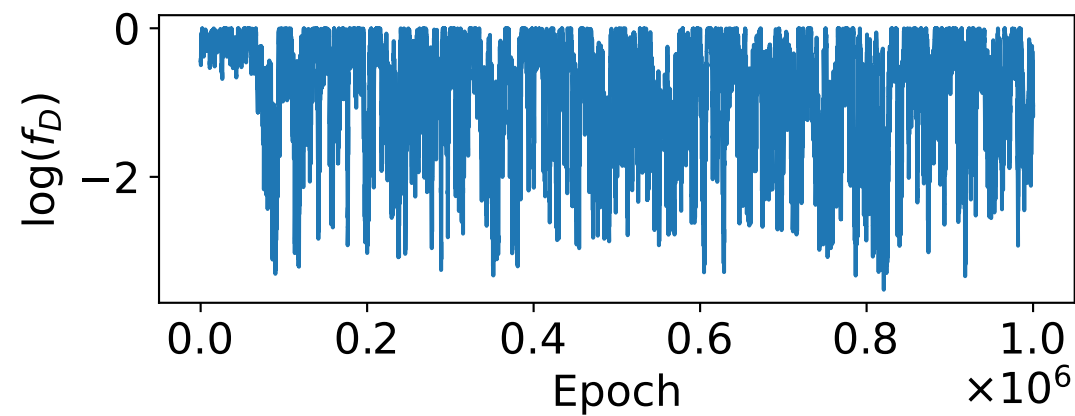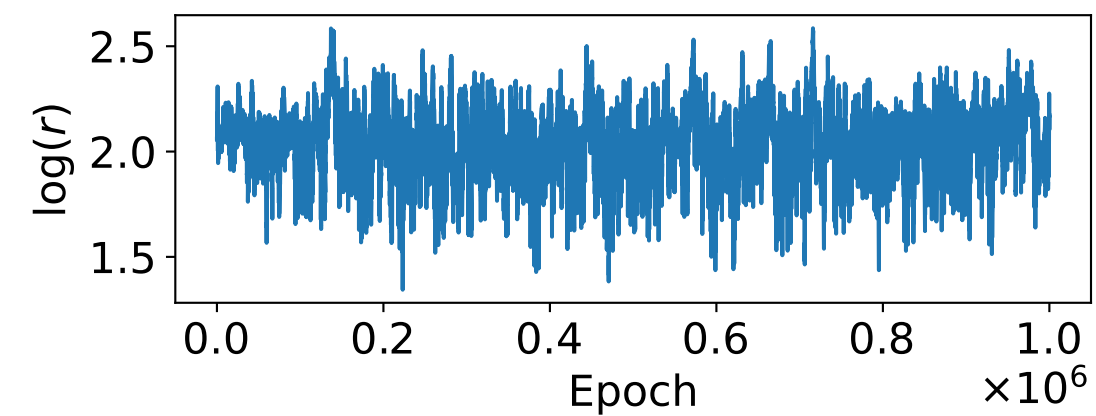

# New Hampshire

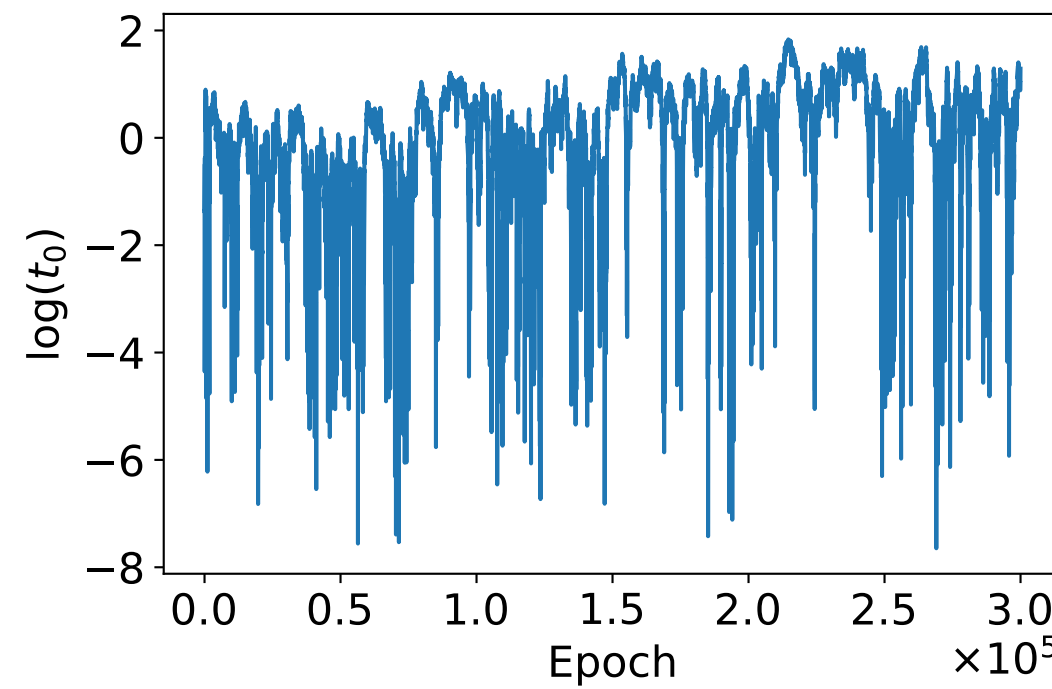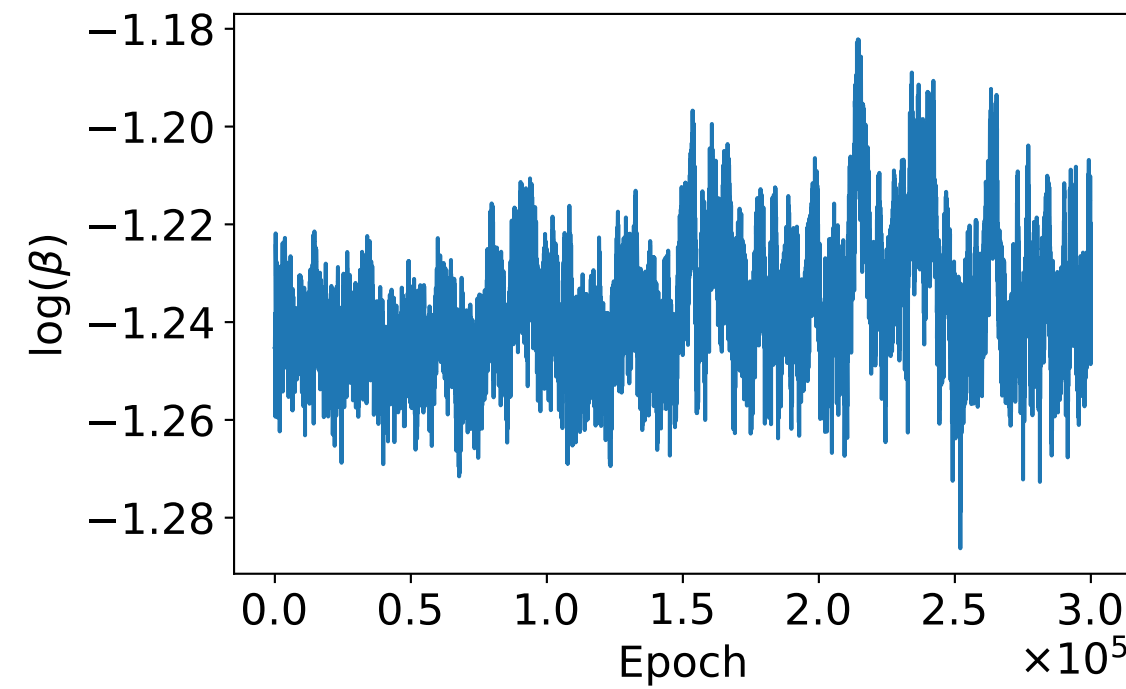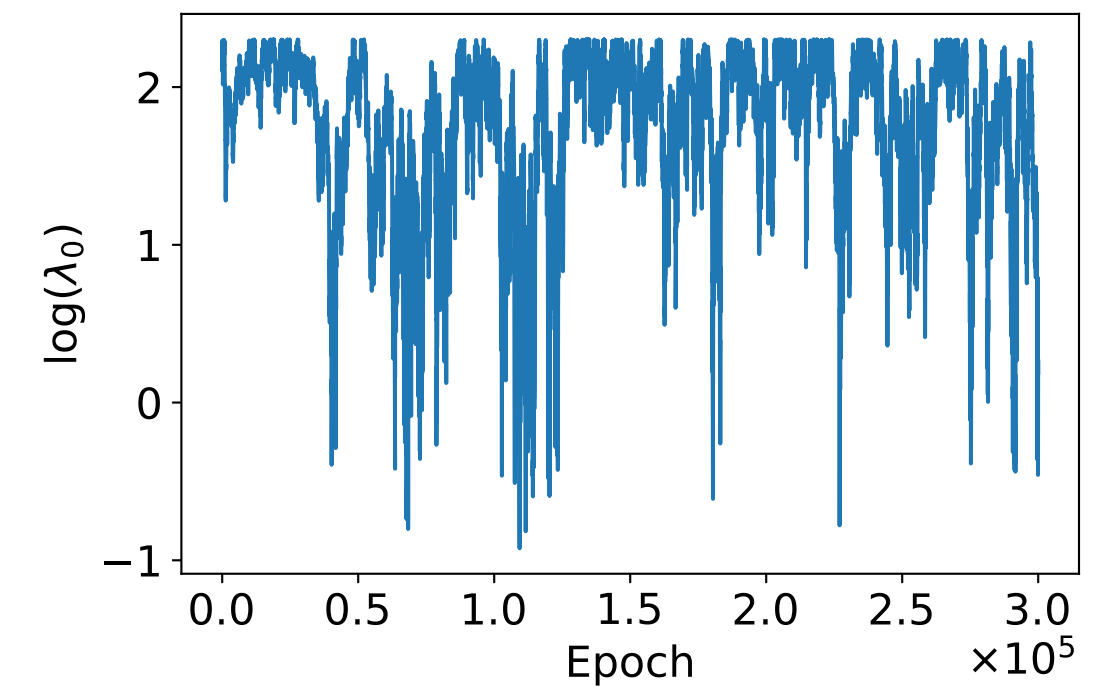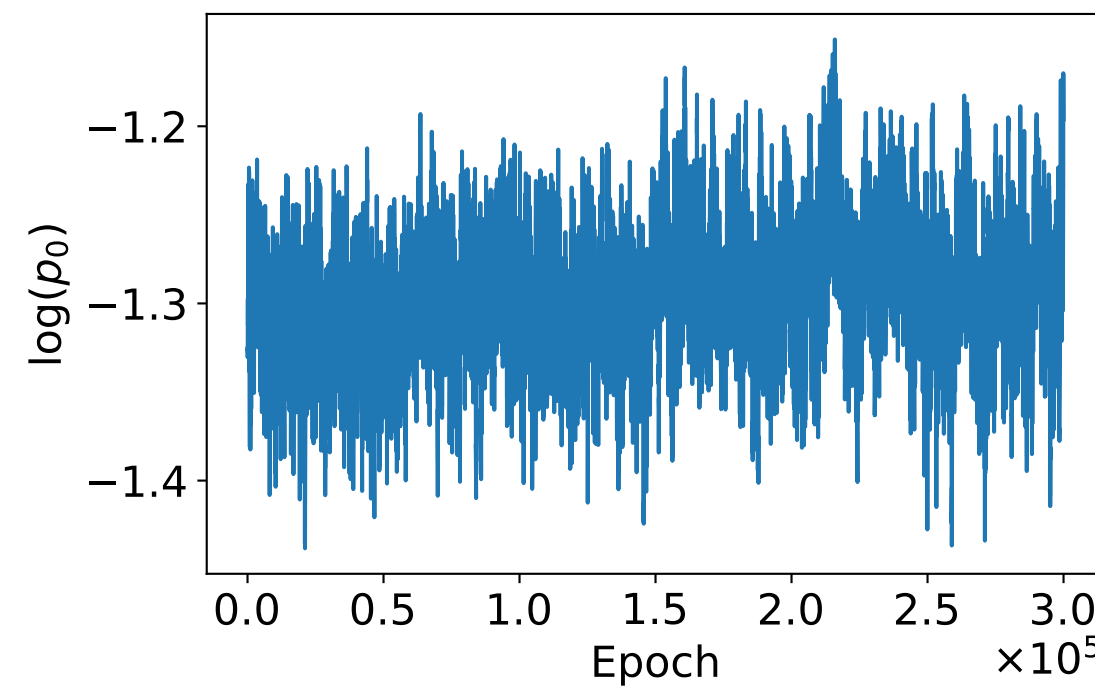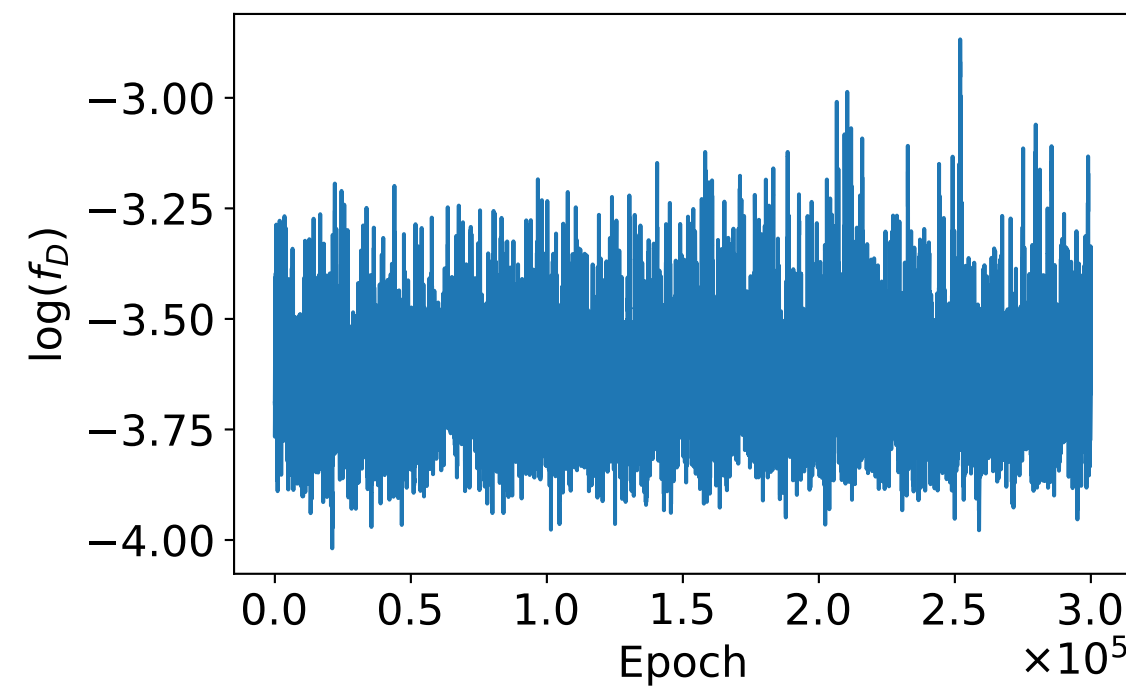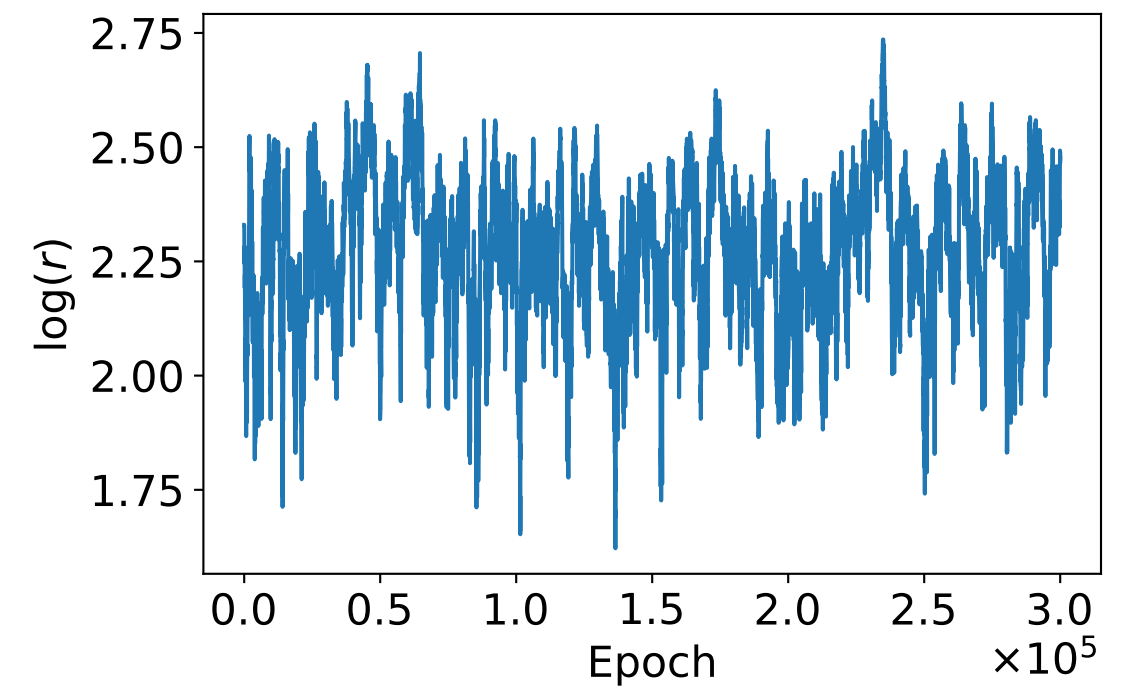



# New Jersey

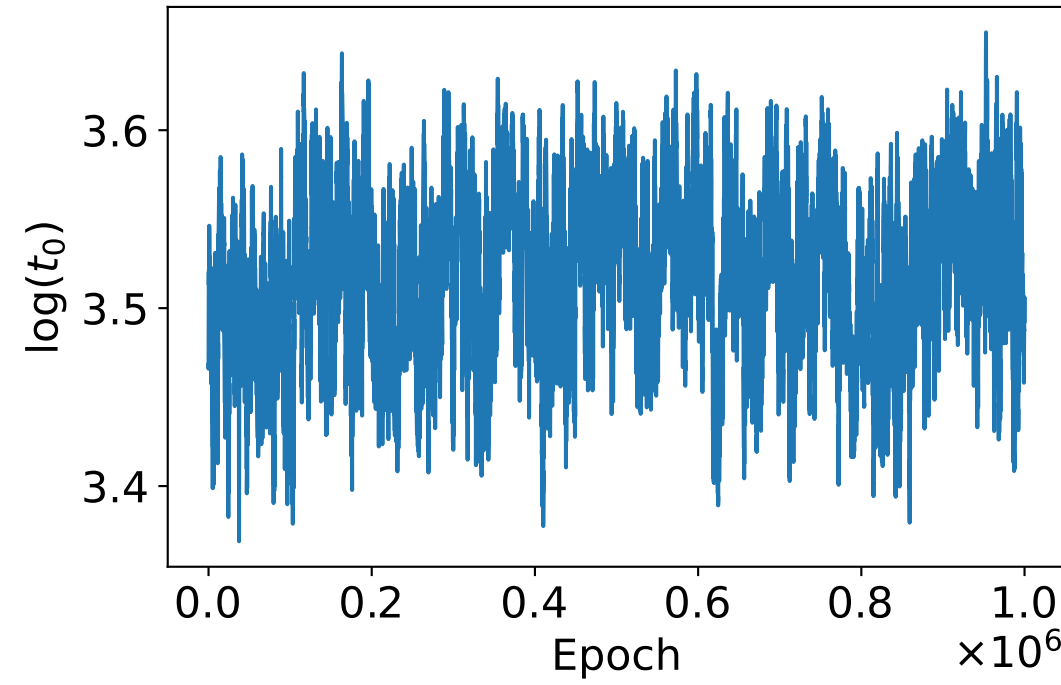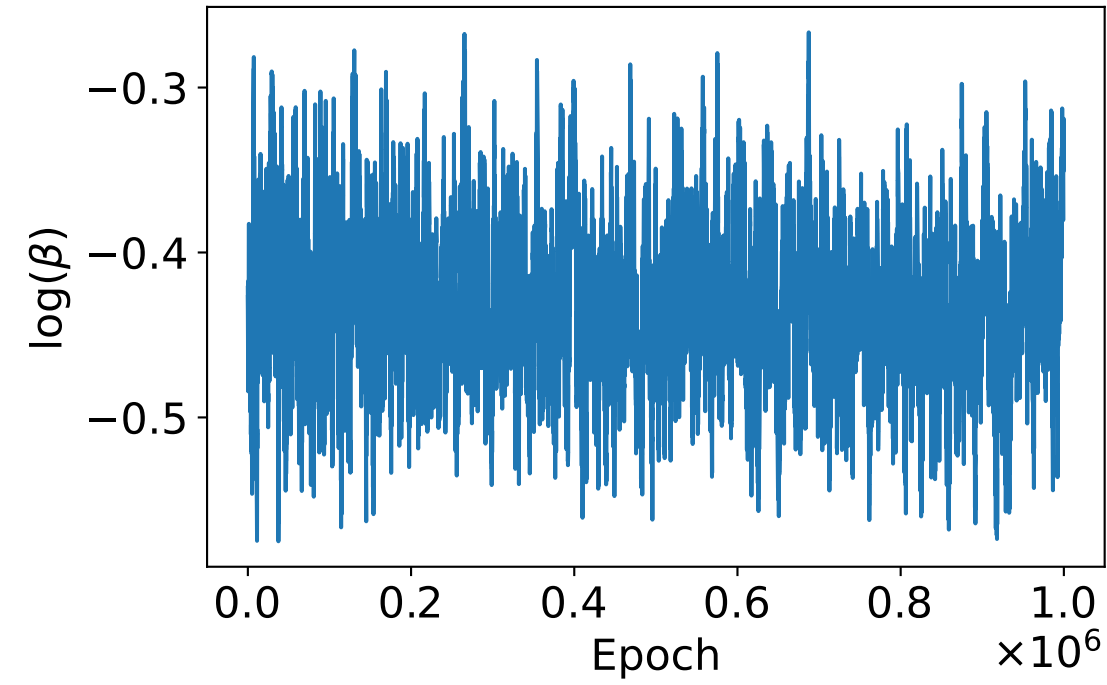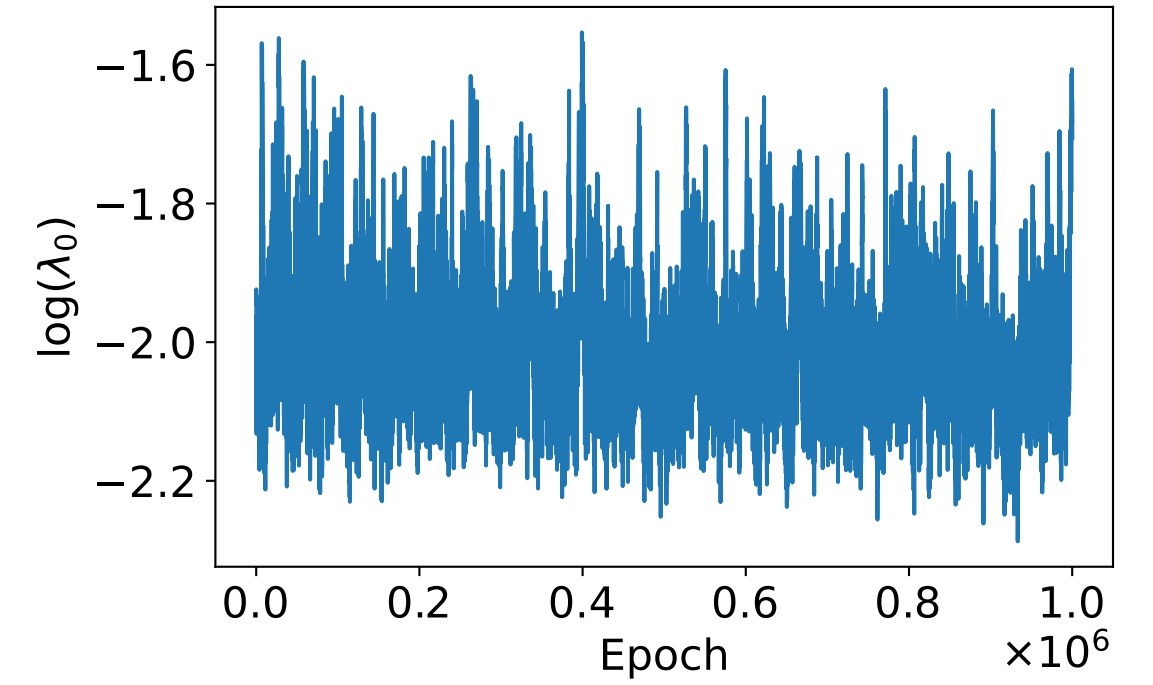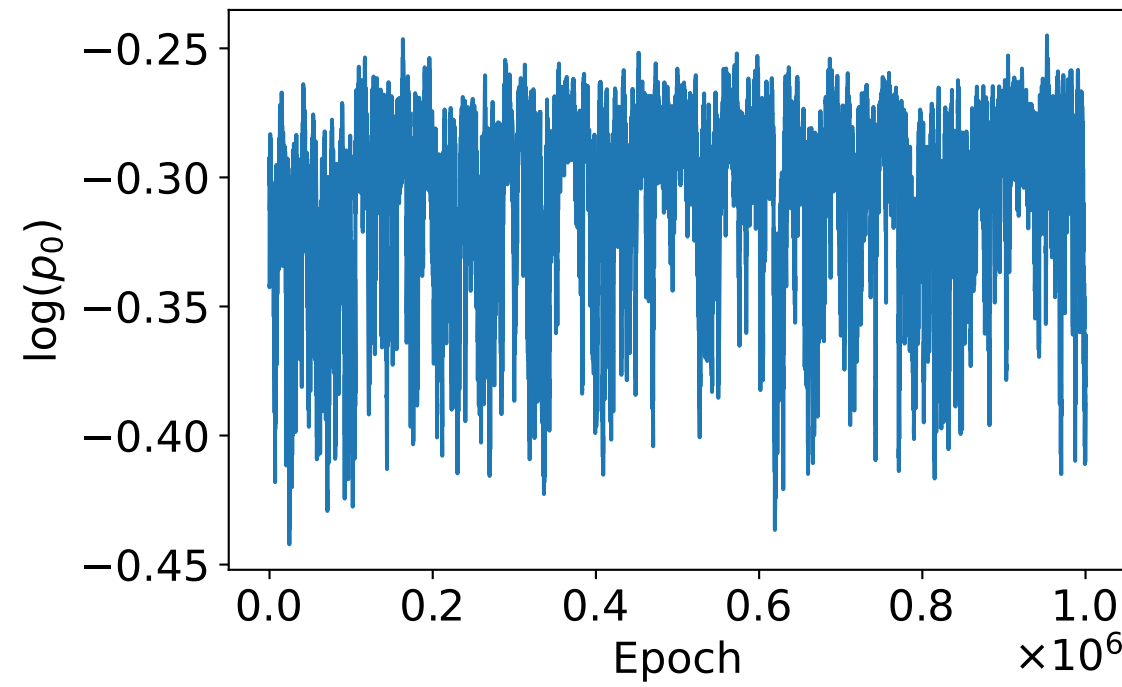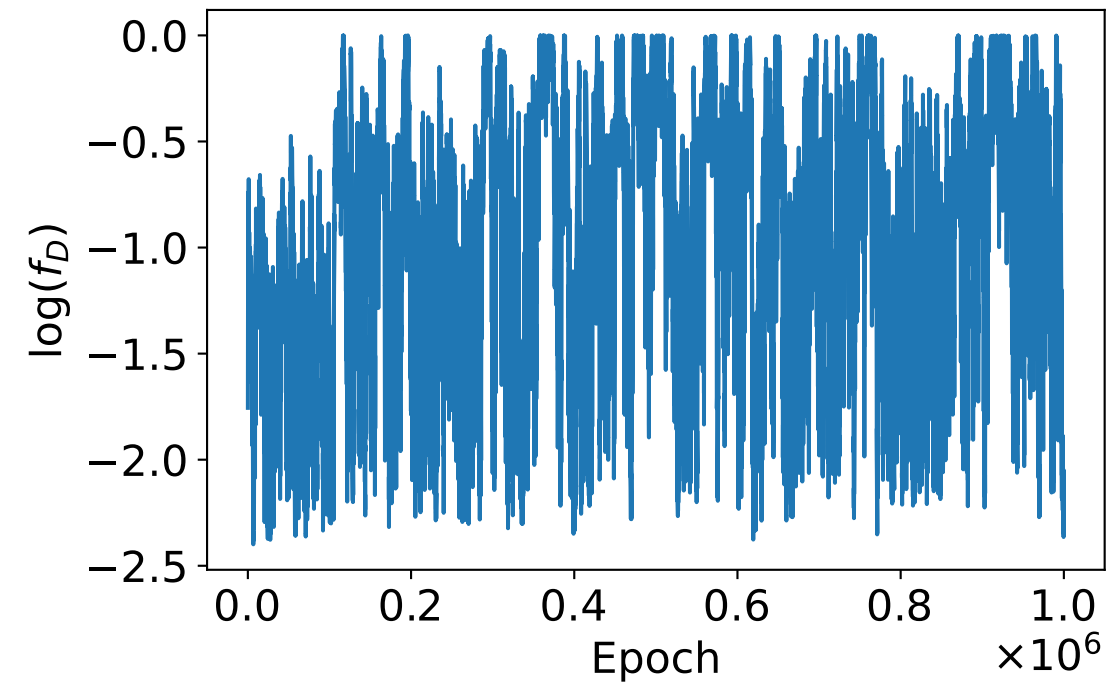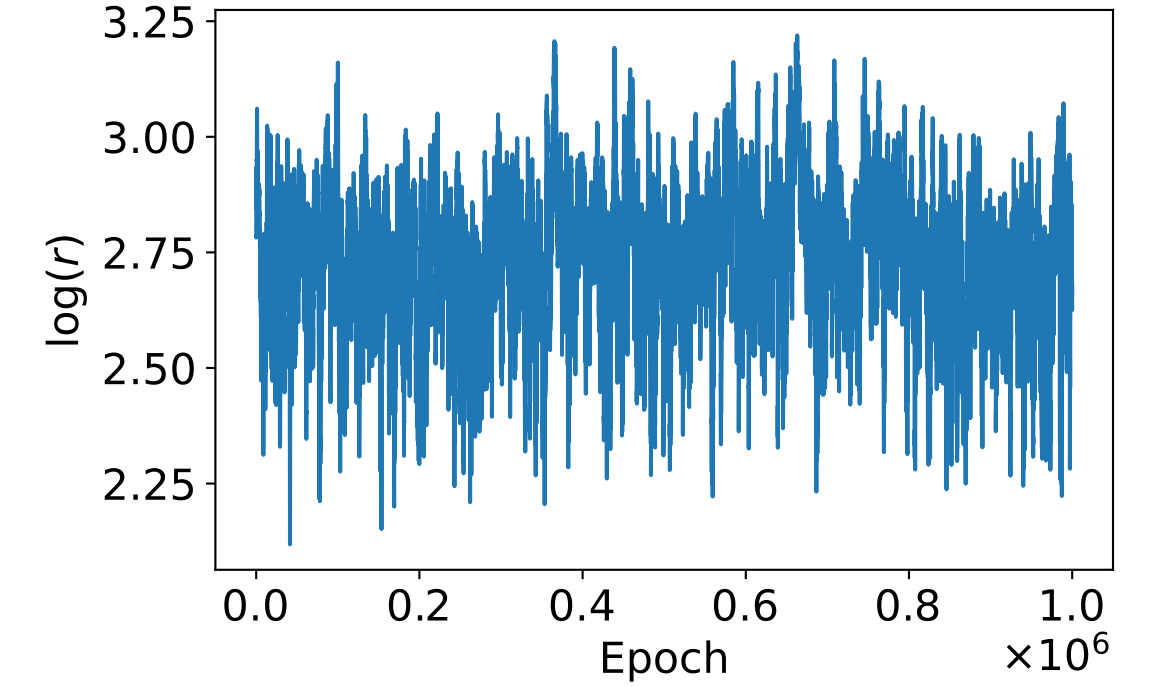

# New Mexico

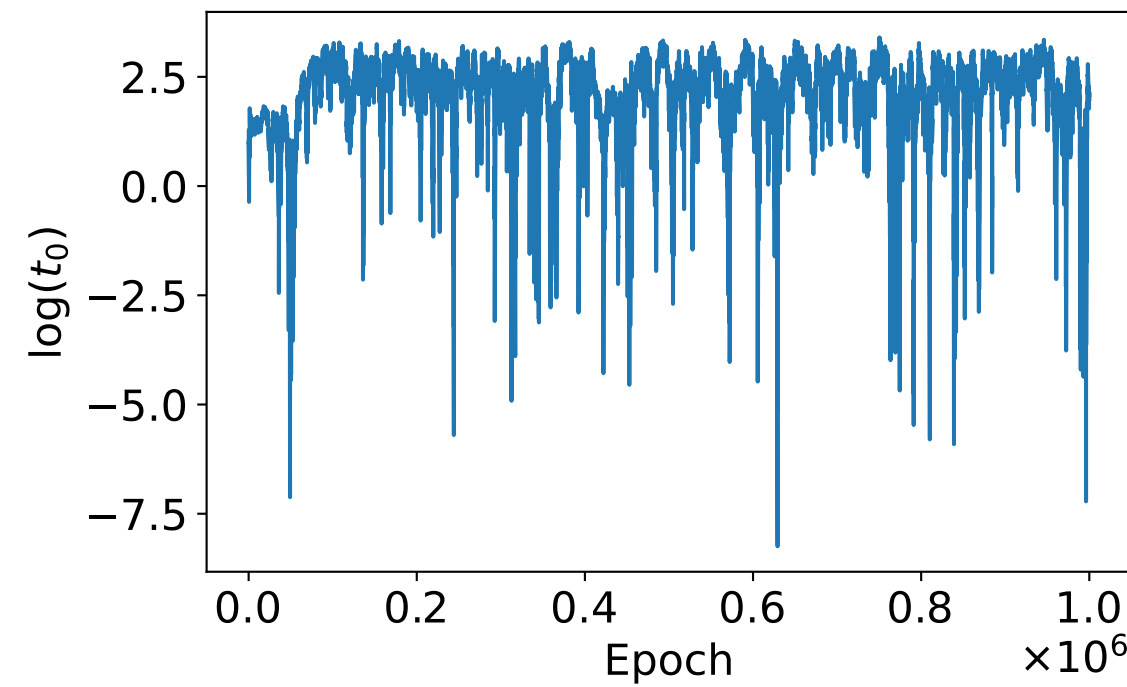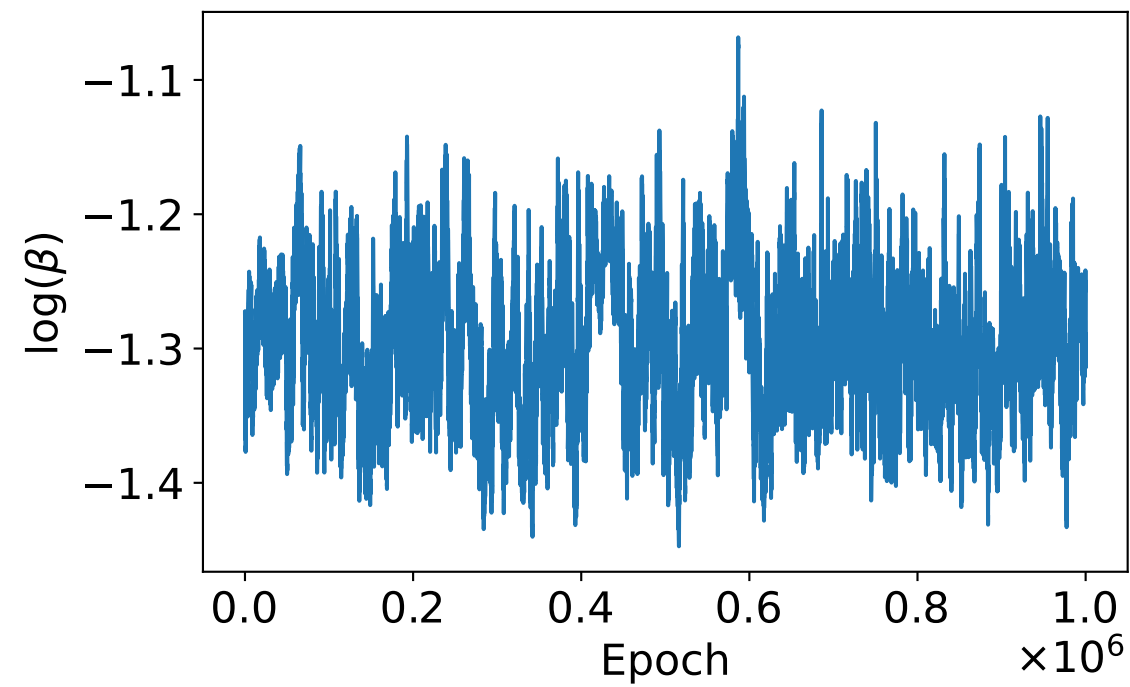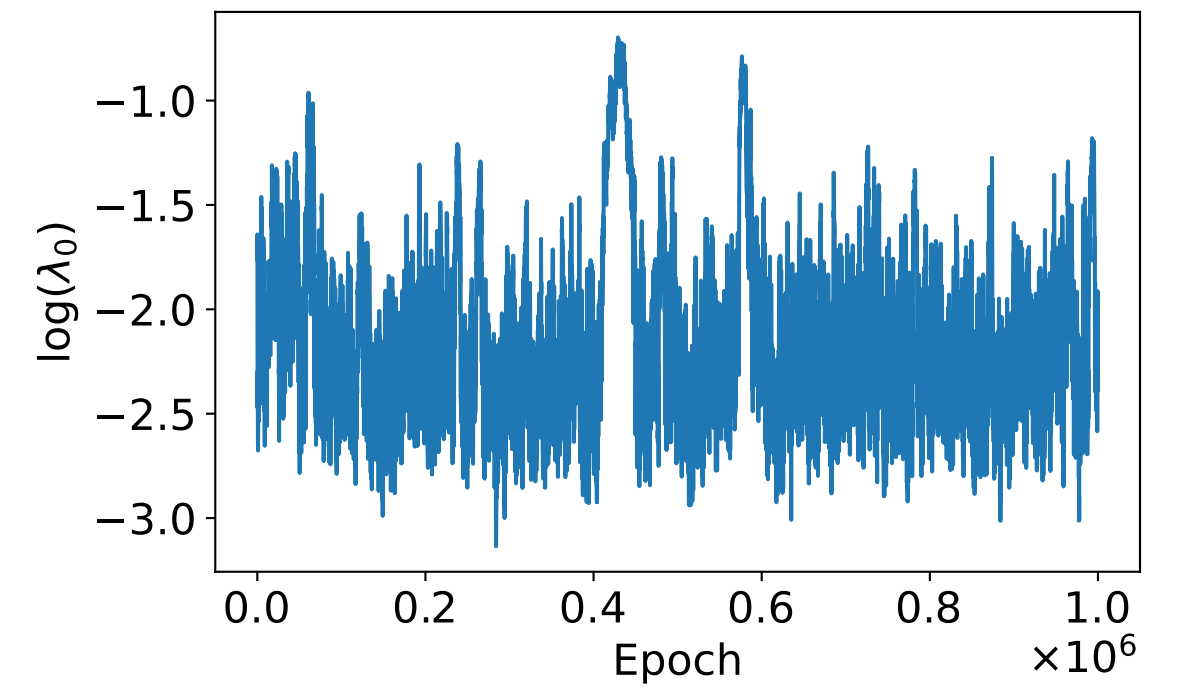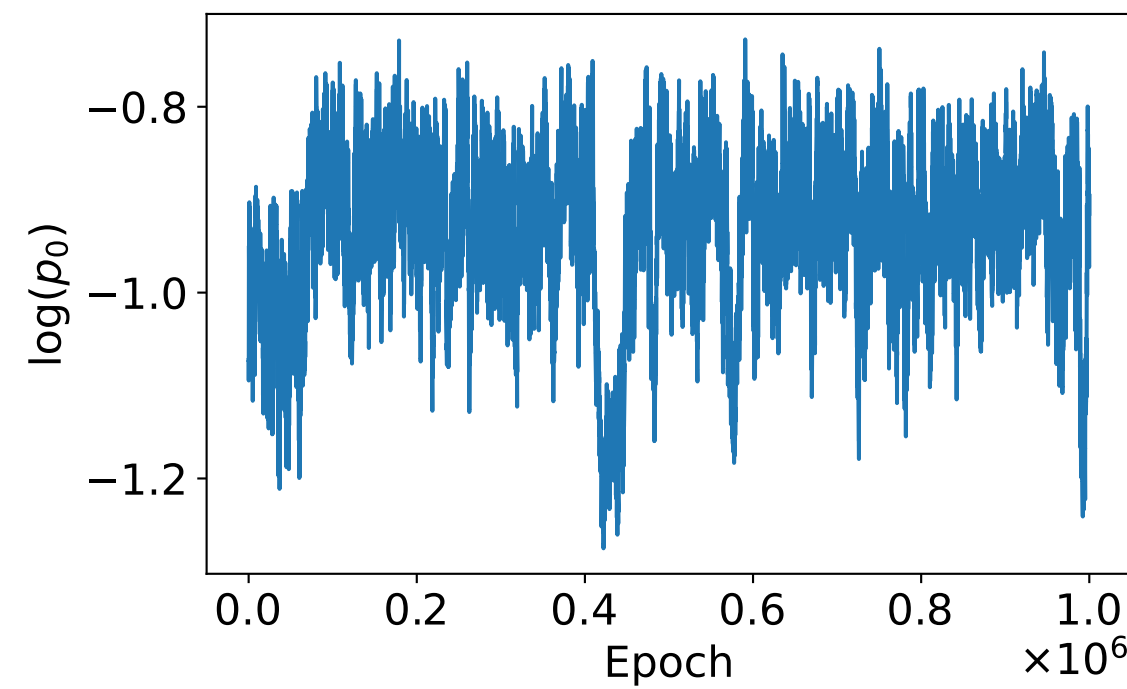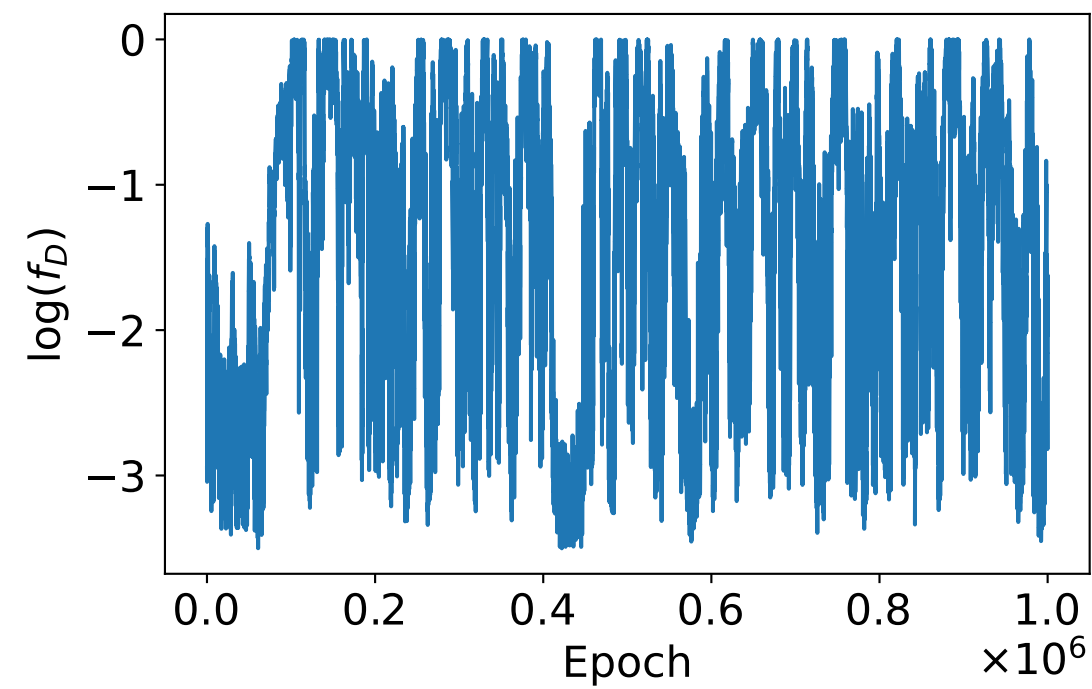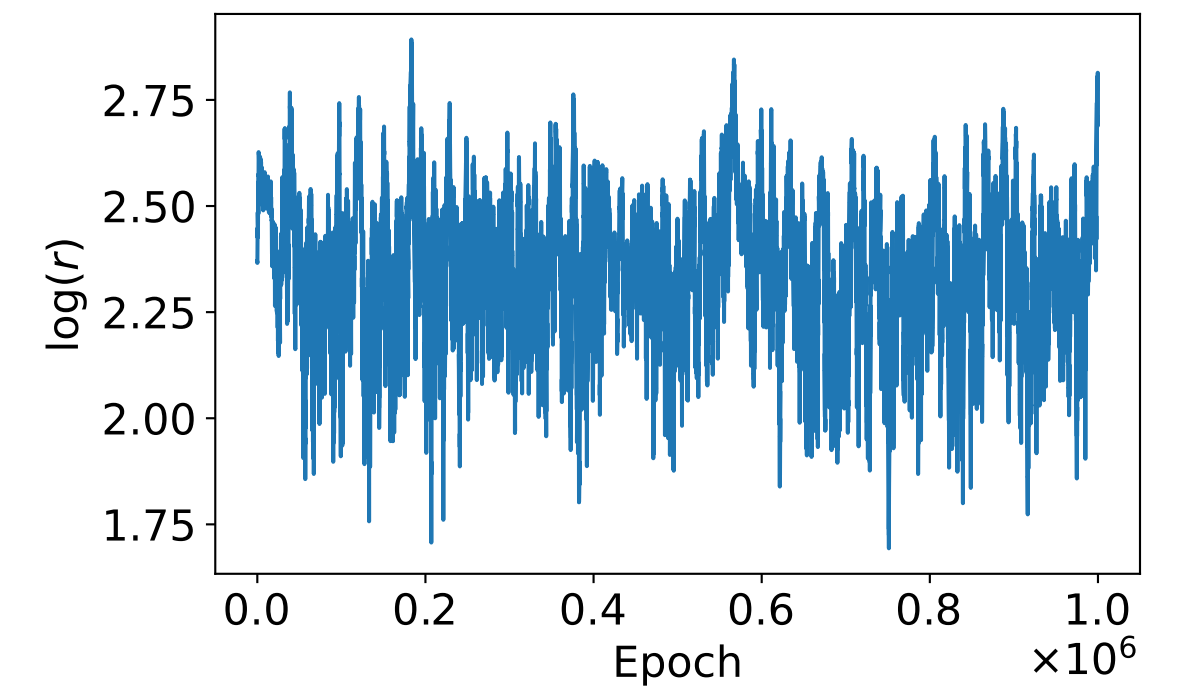

# New York

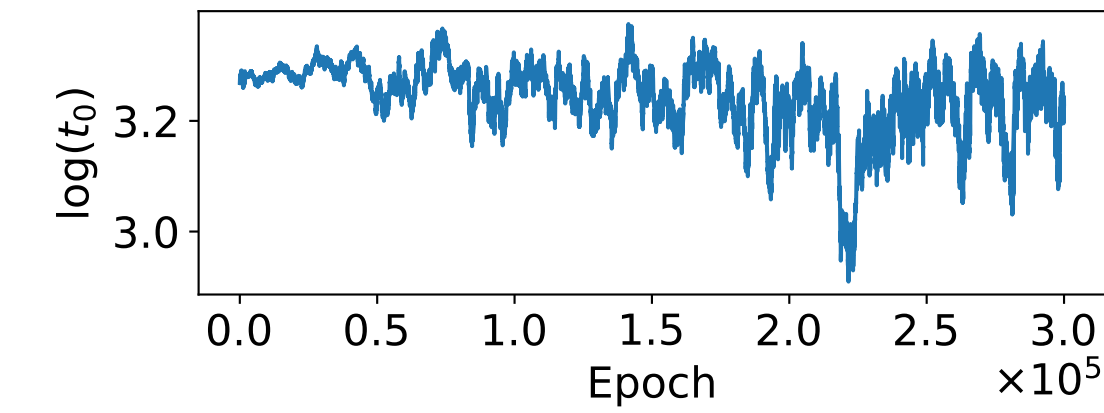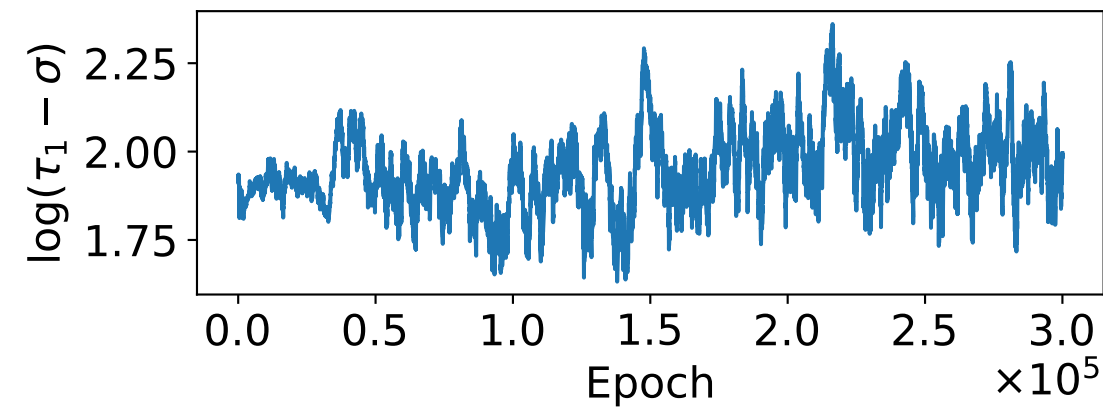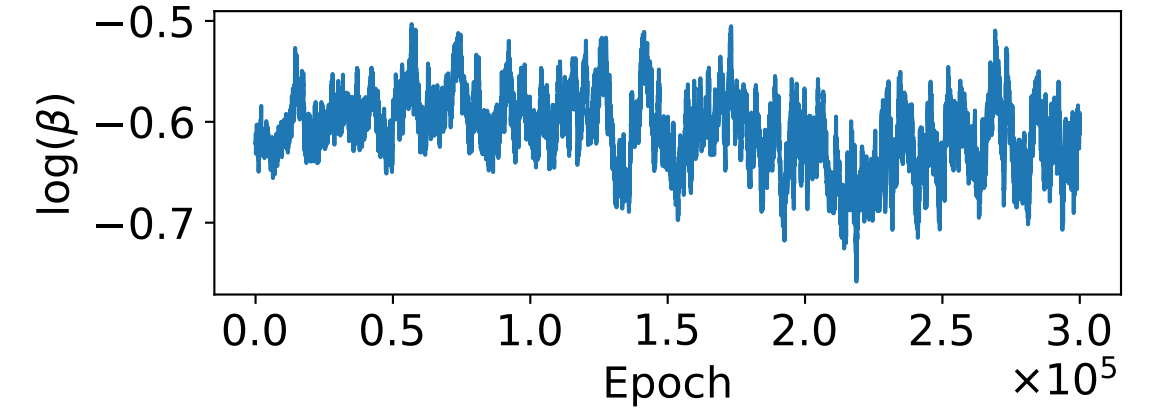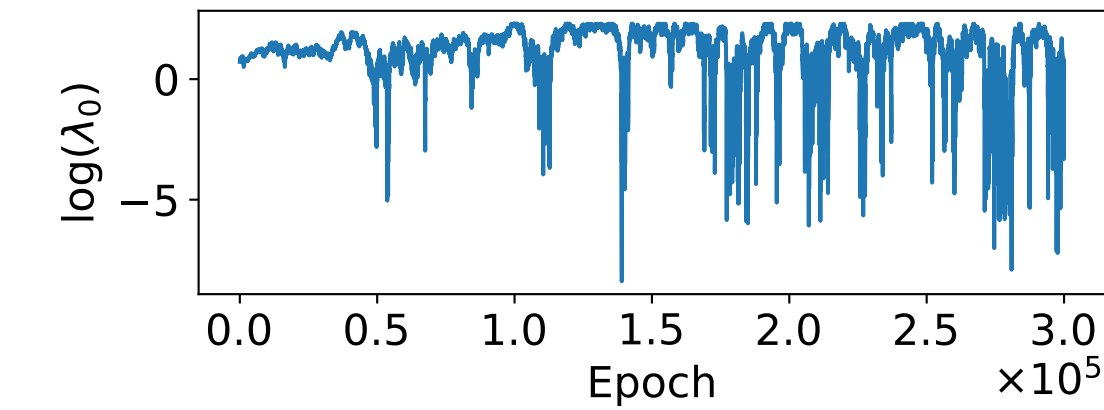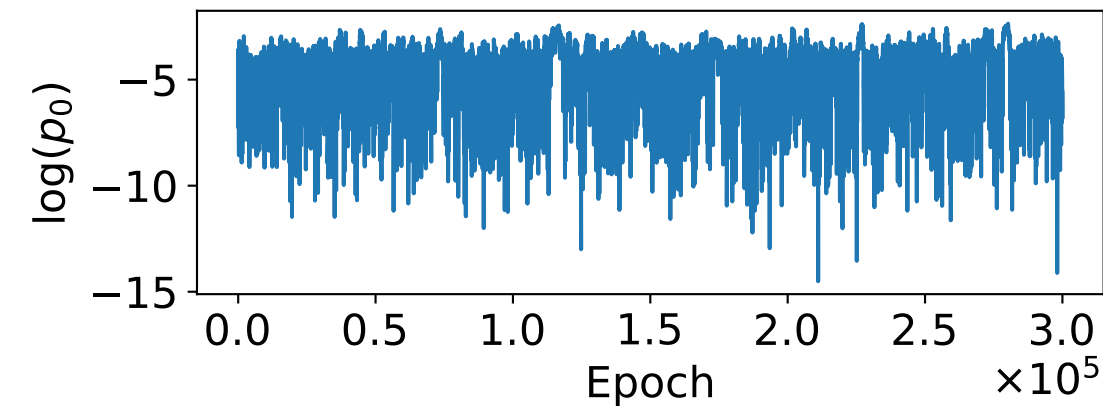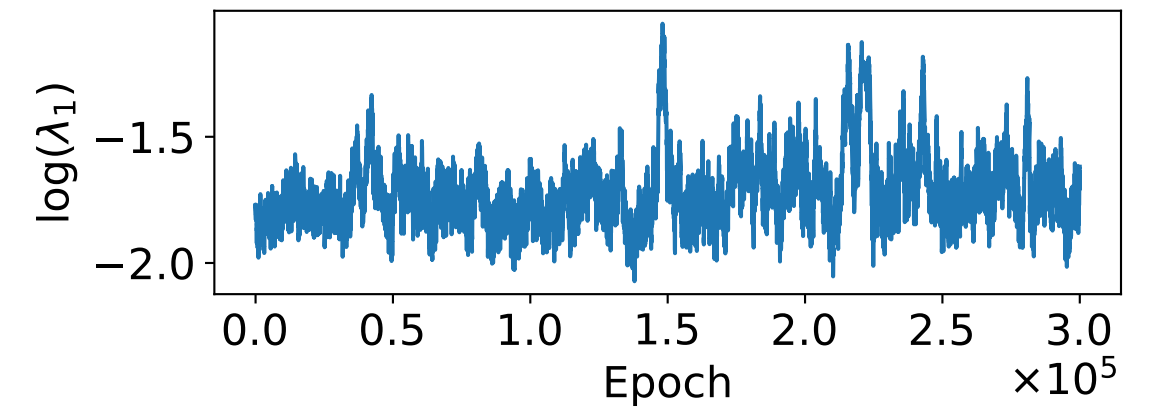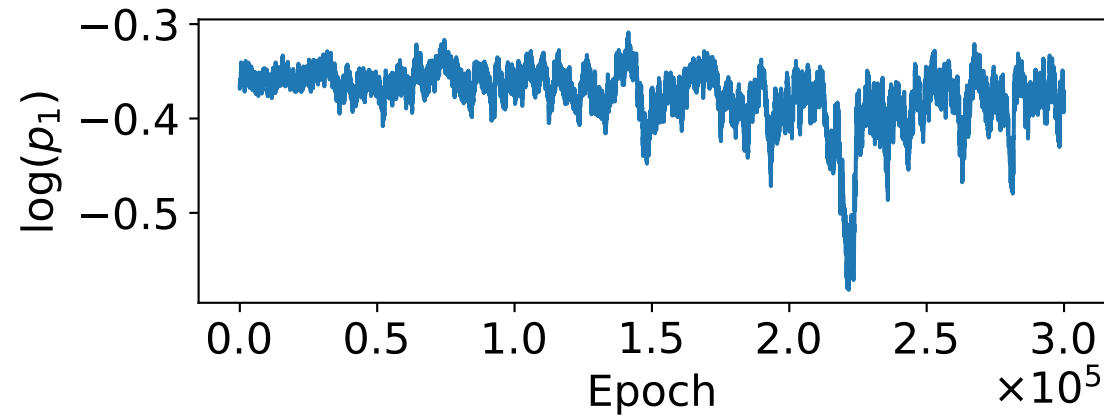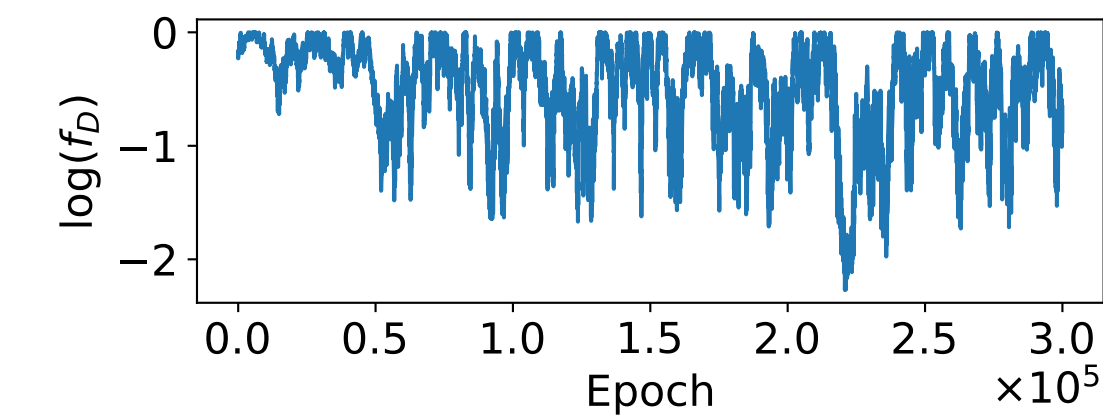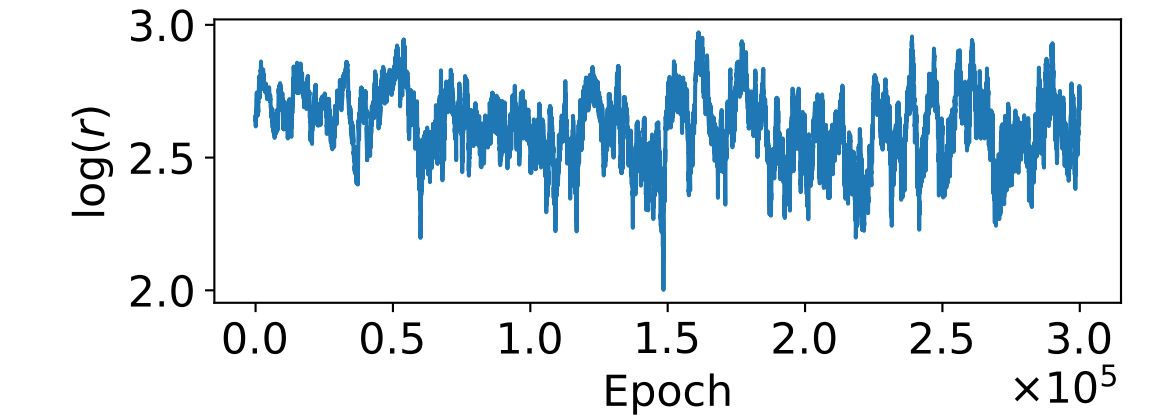

# North Carolina

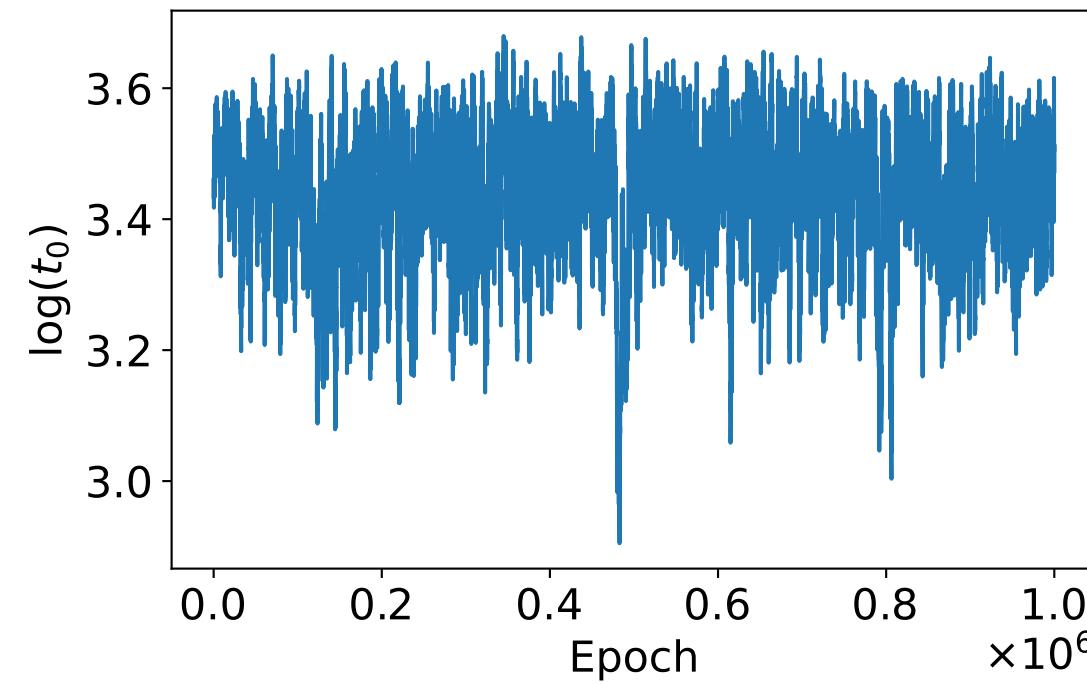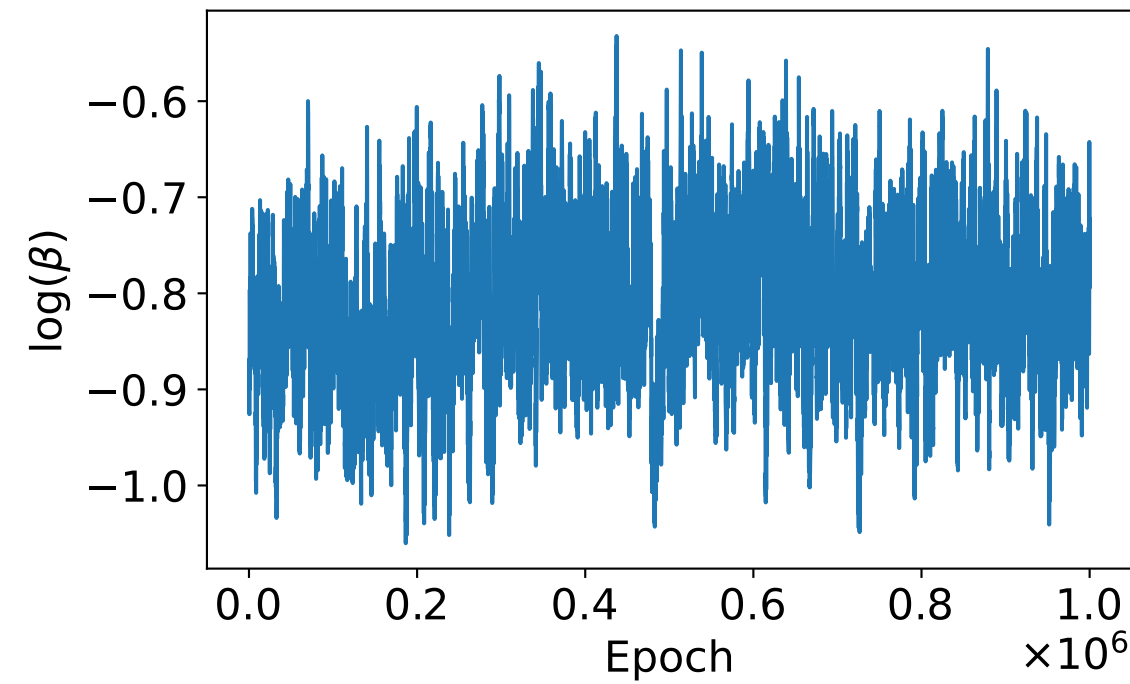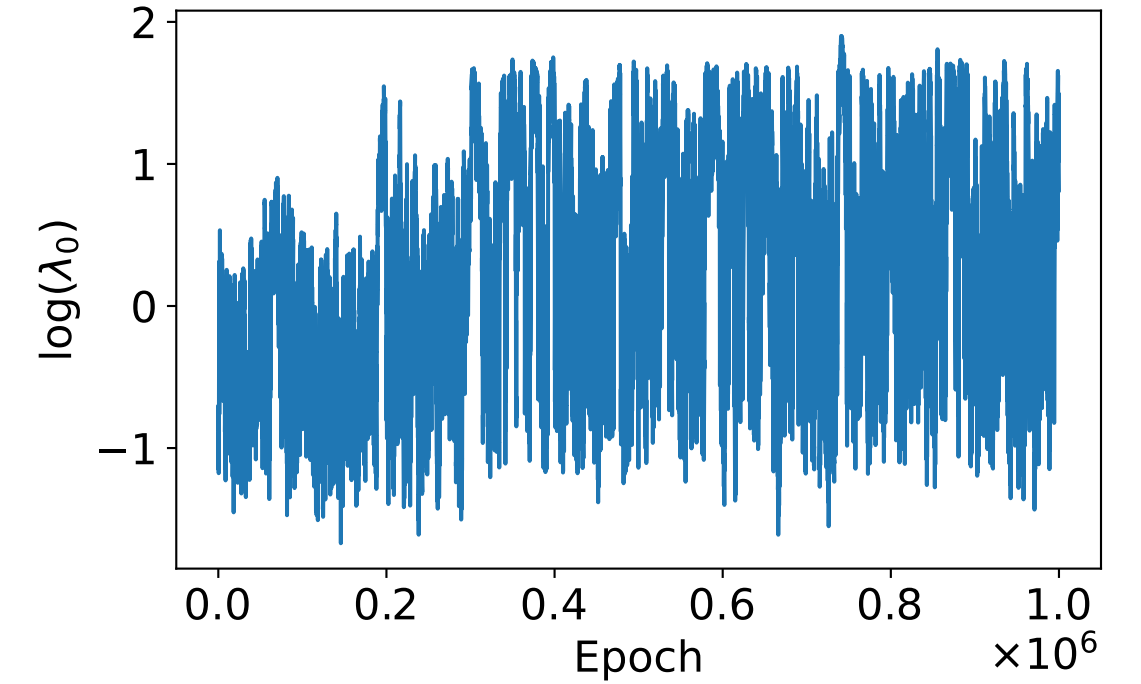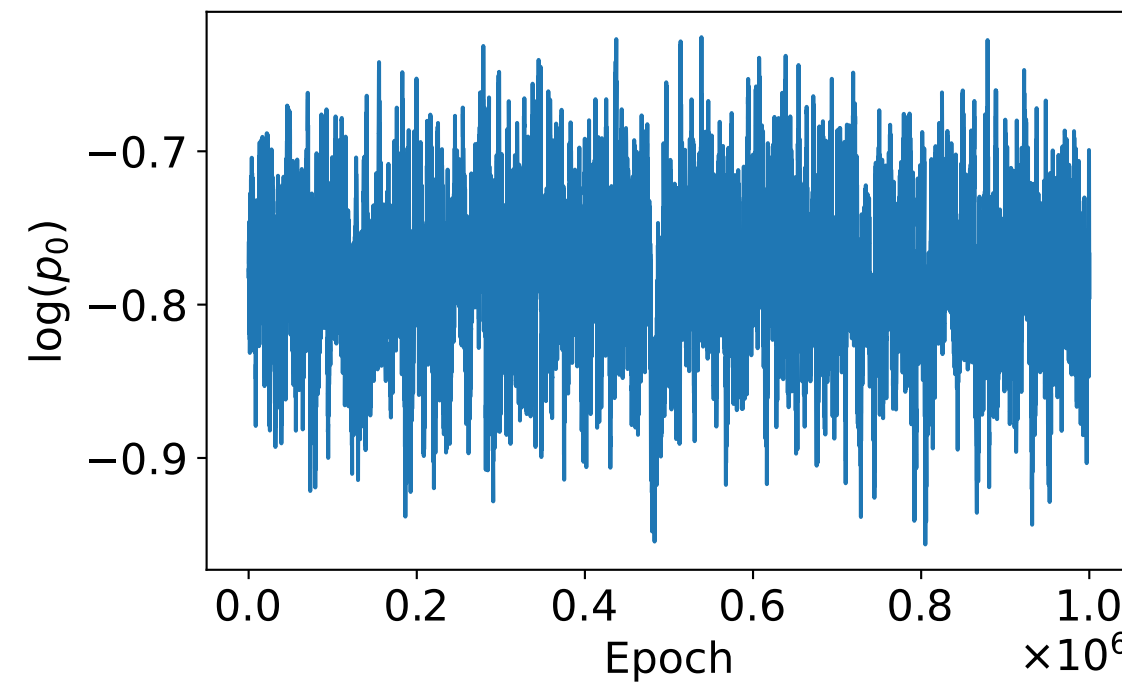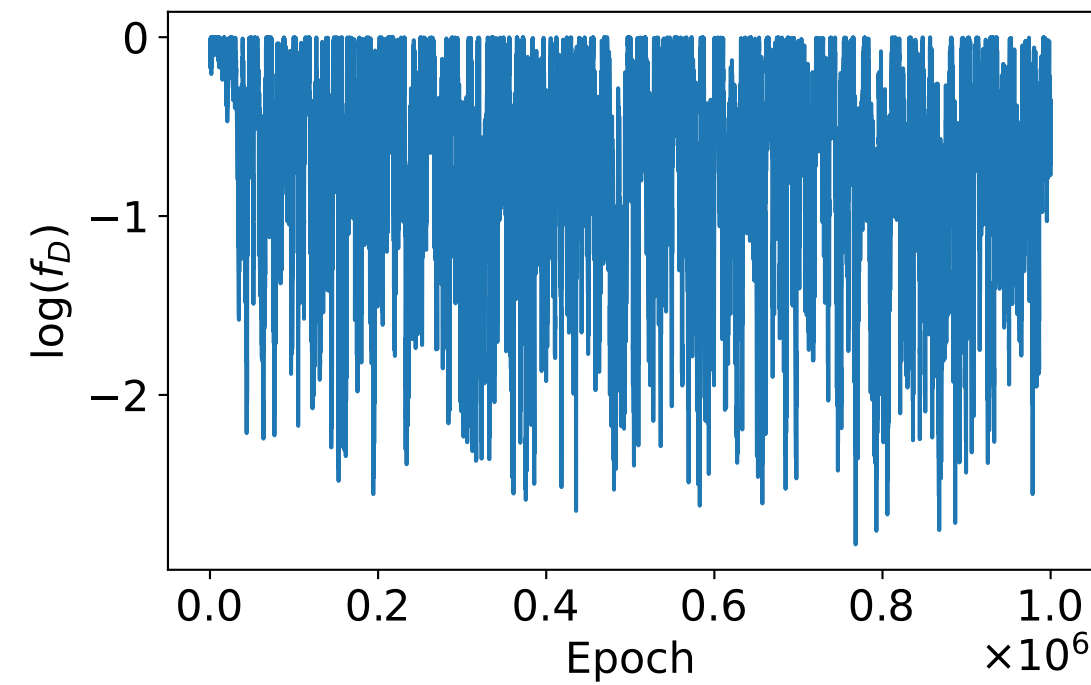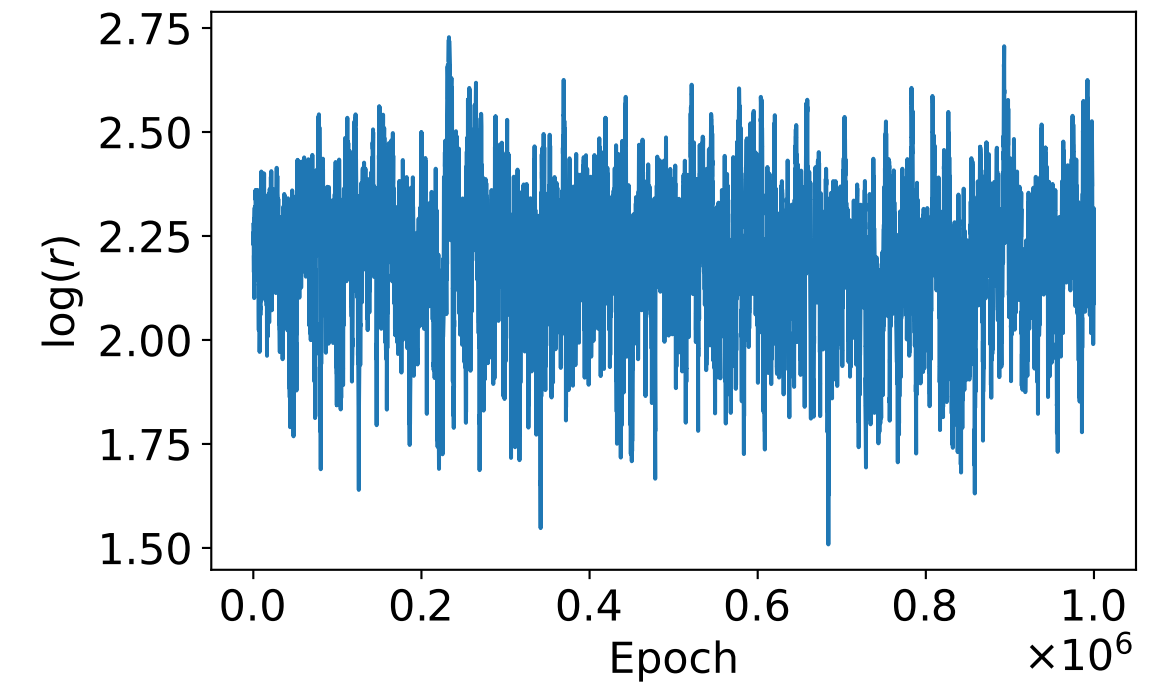

# North Dakota

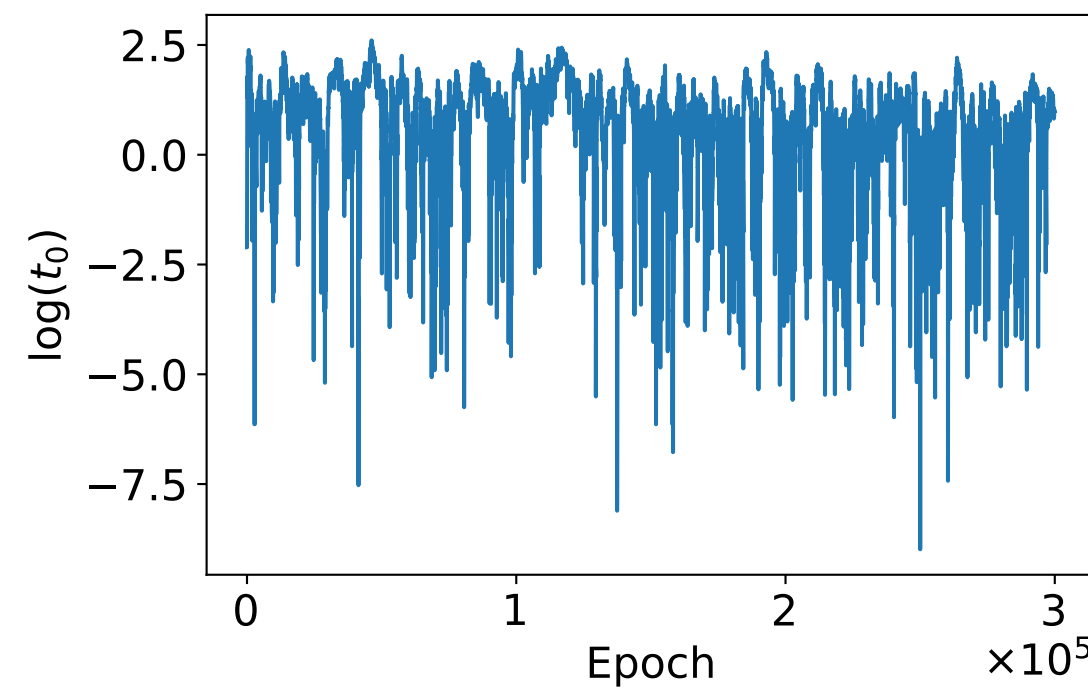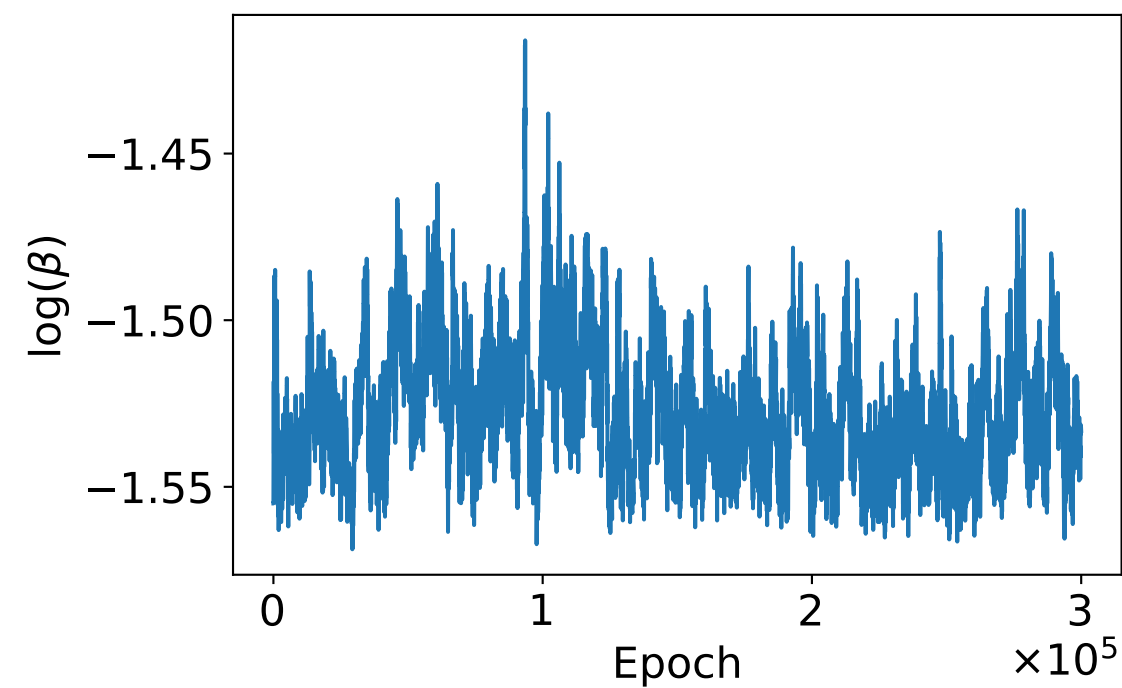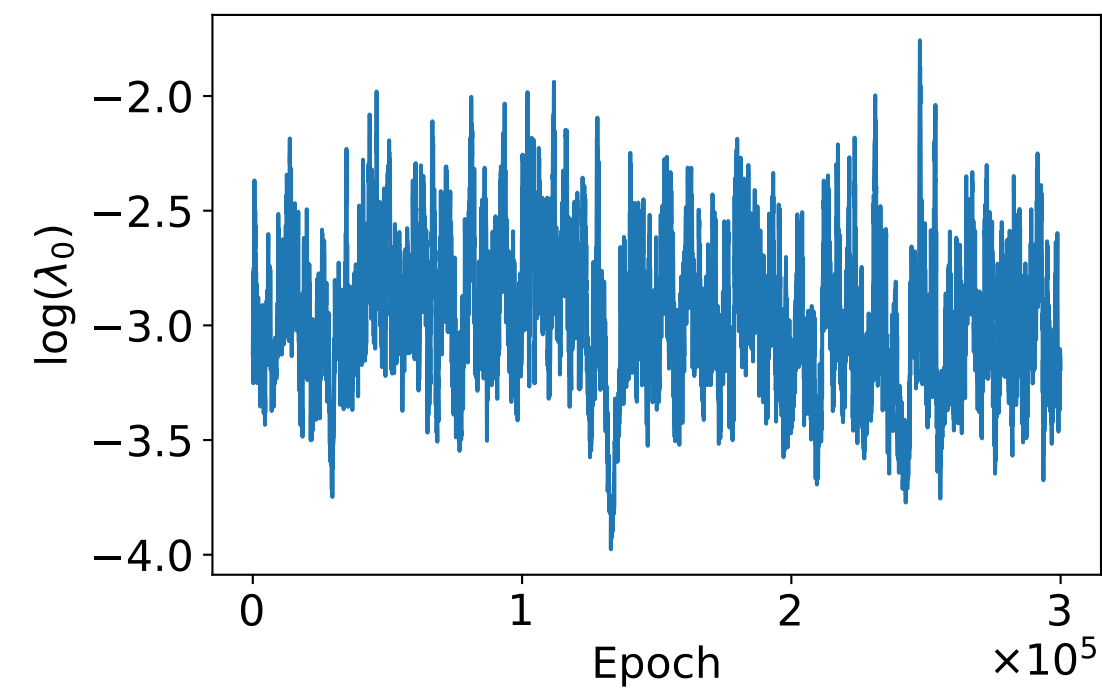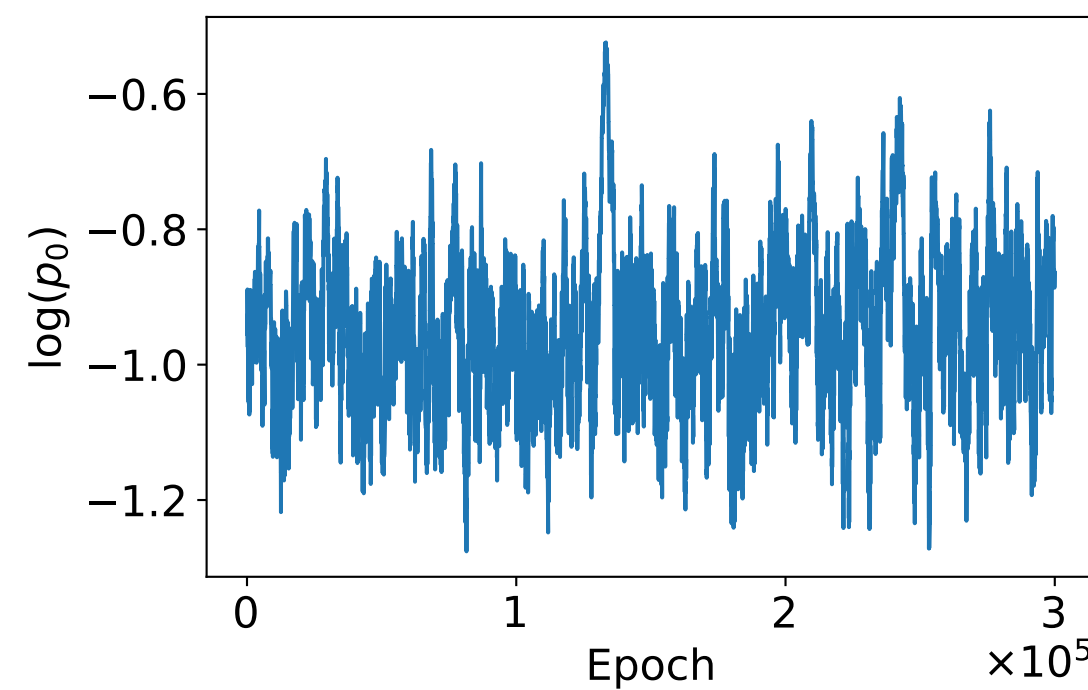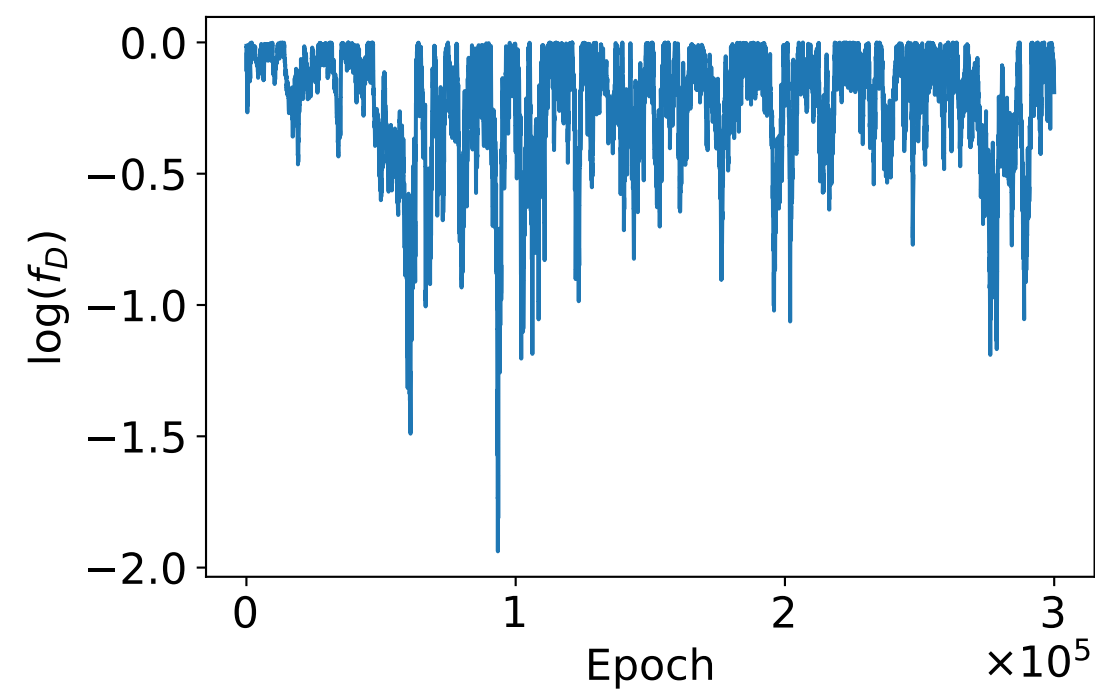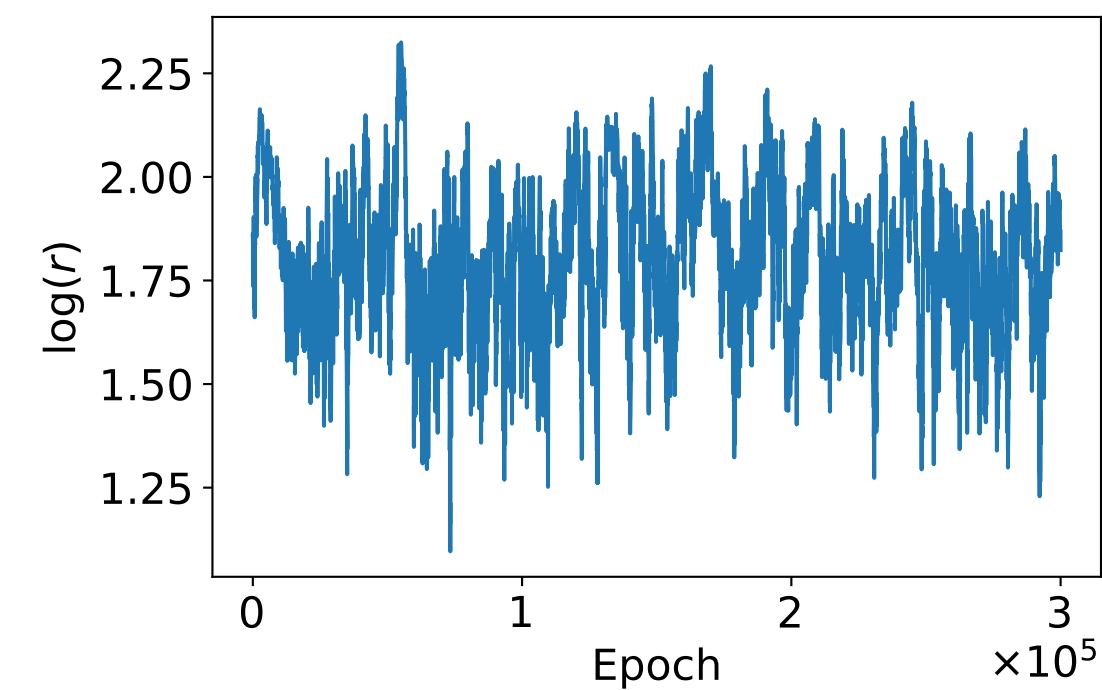

# Ohio

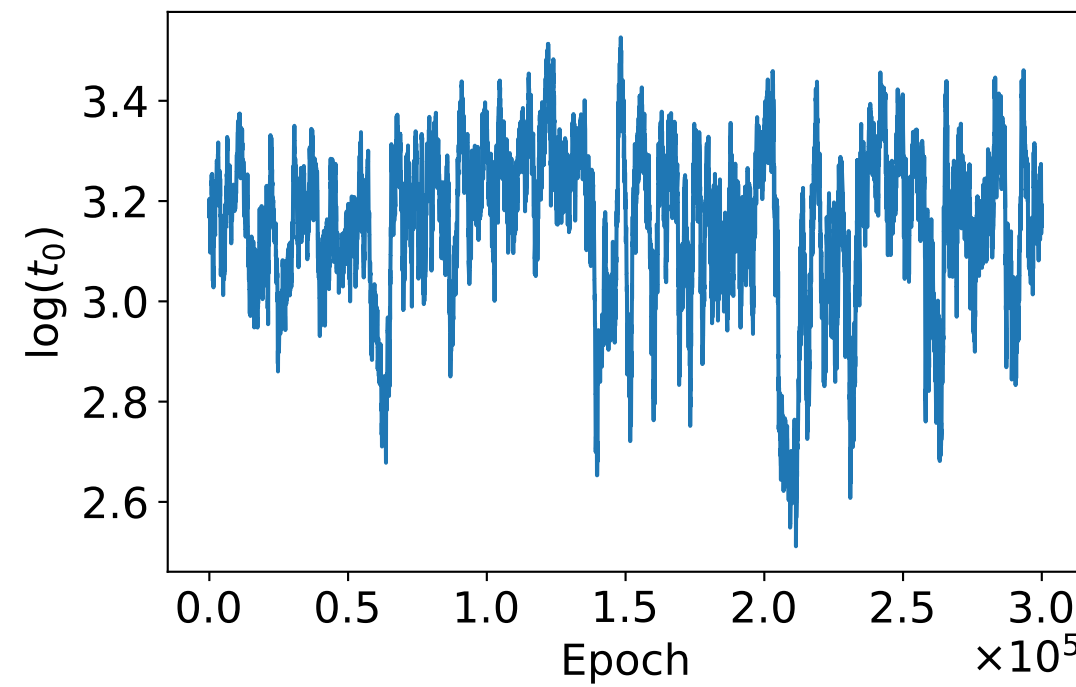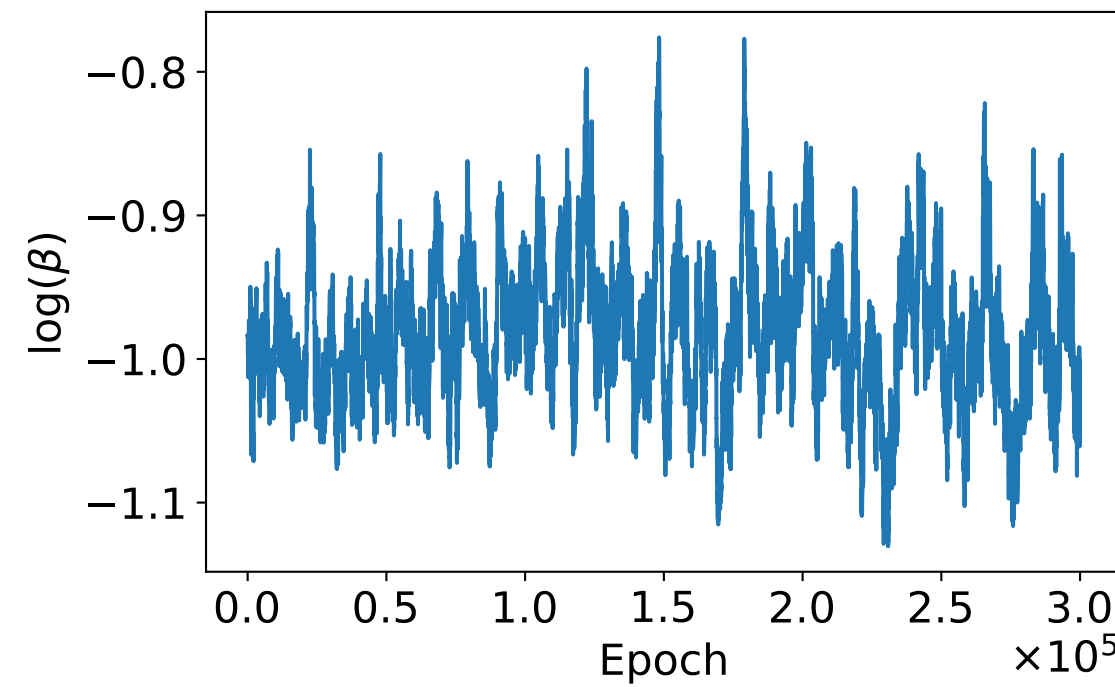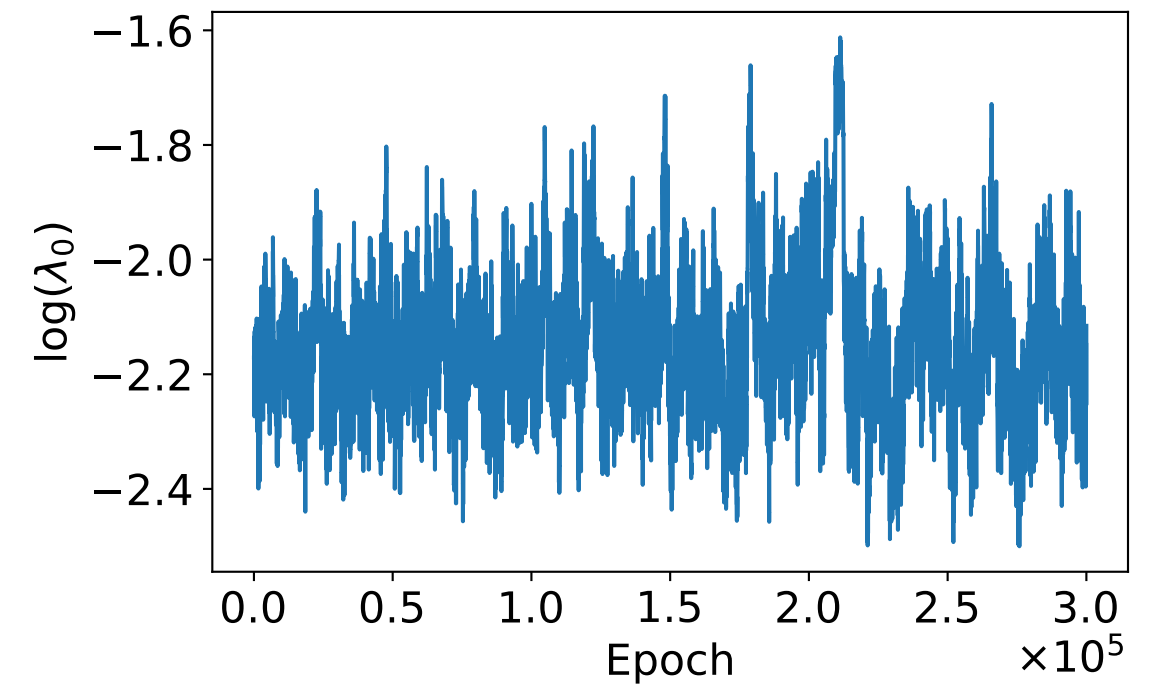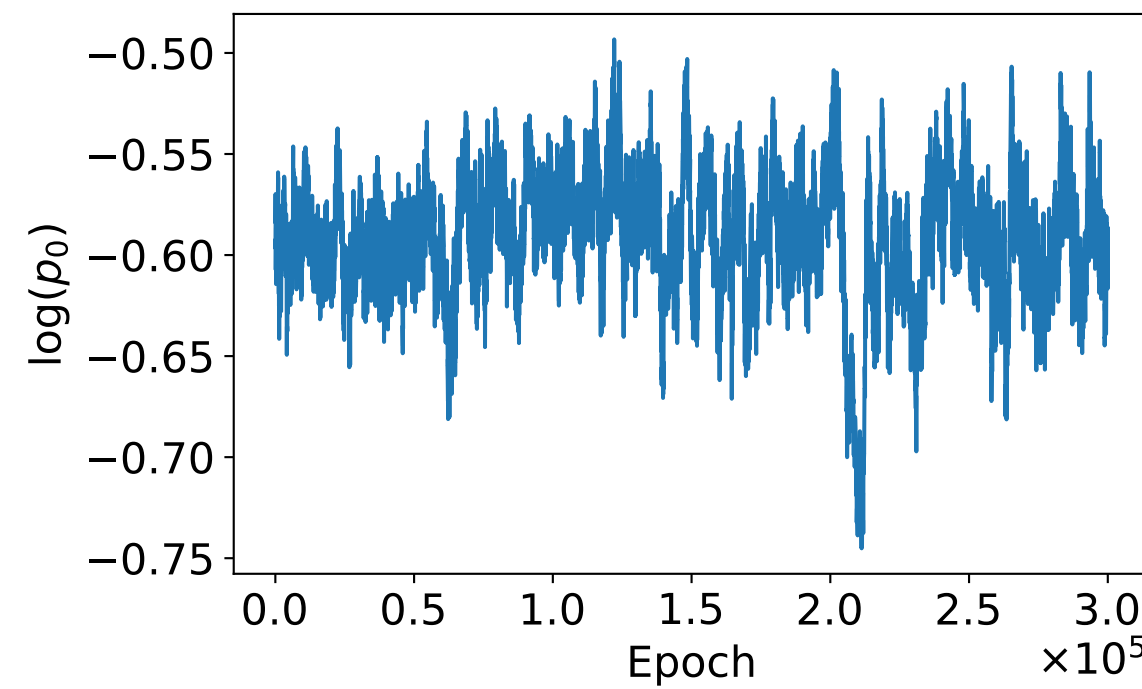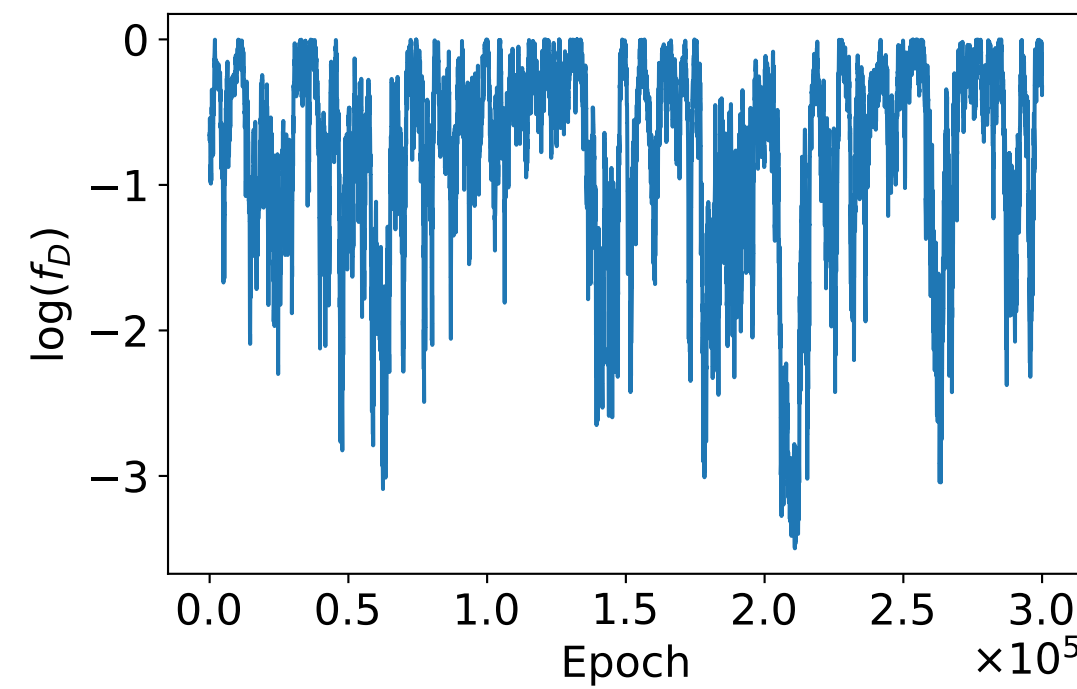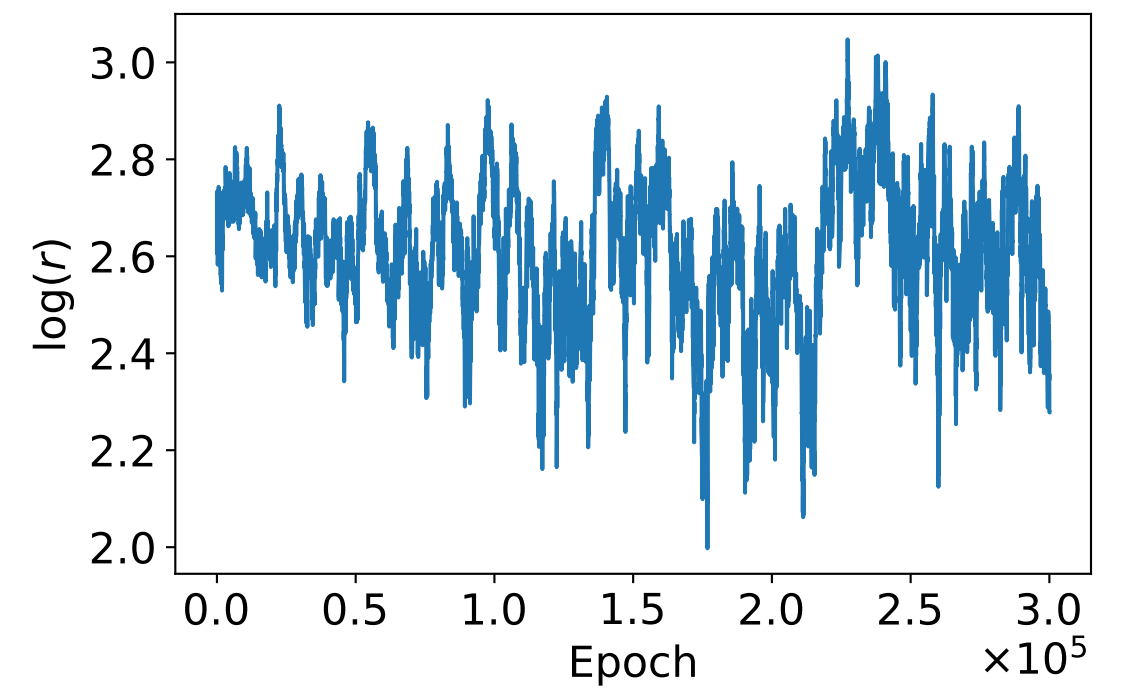

# Oklahoma

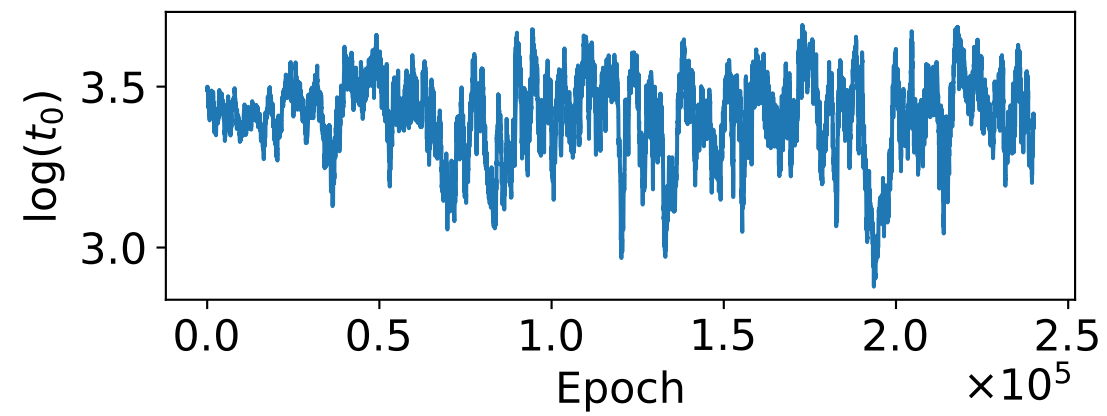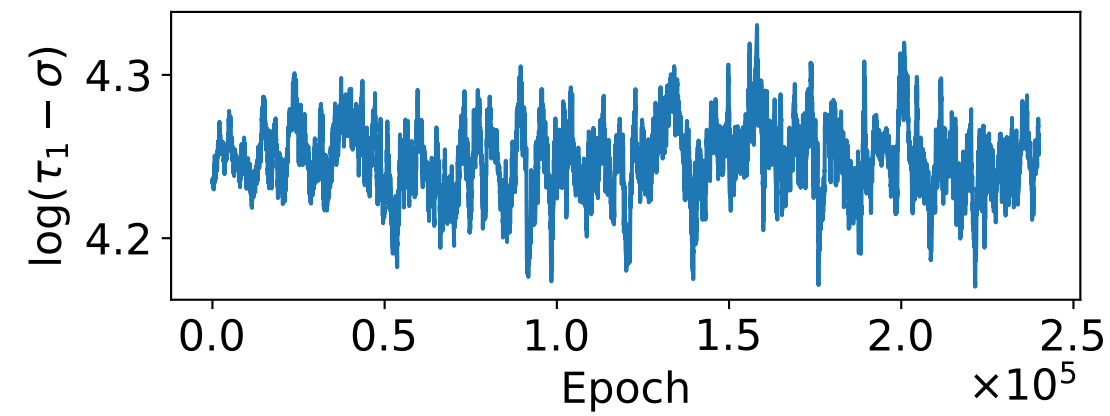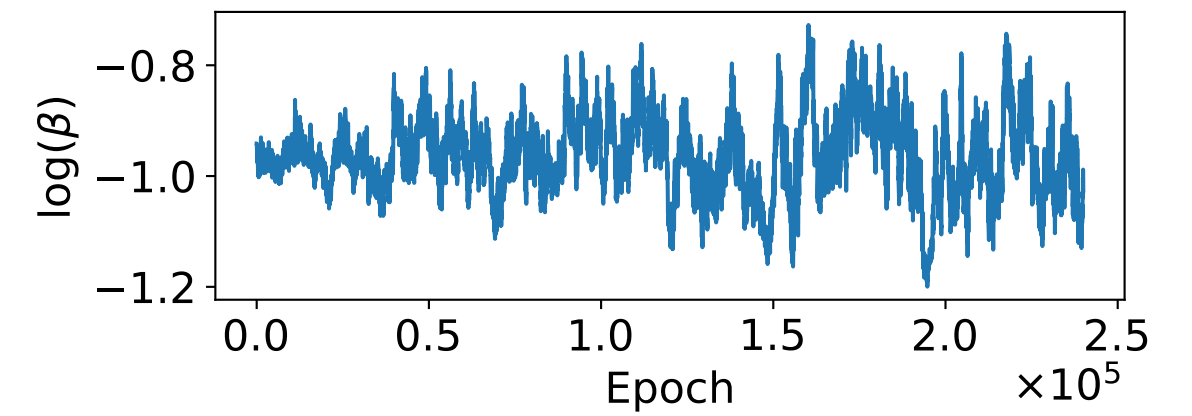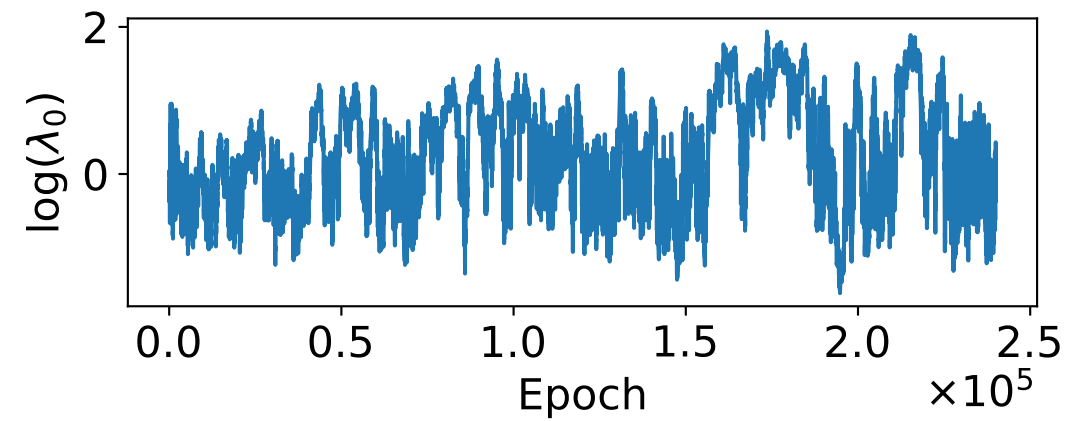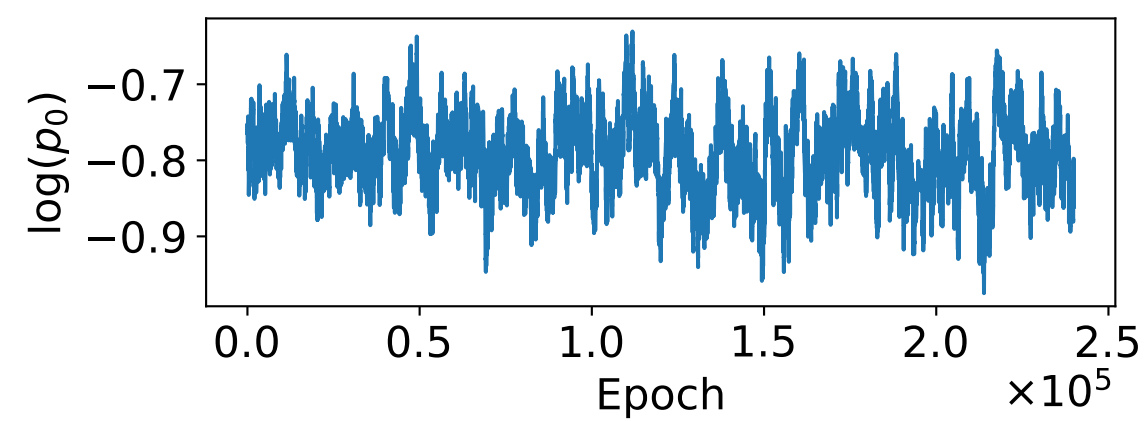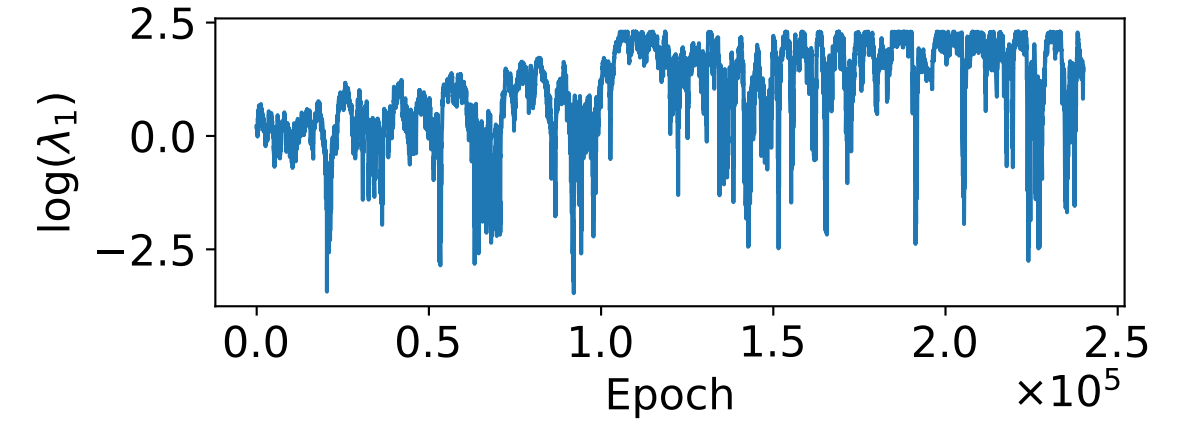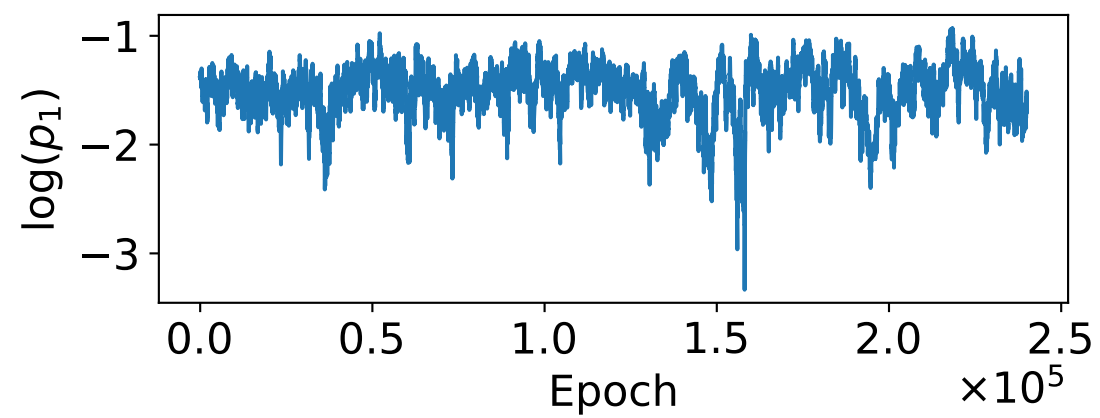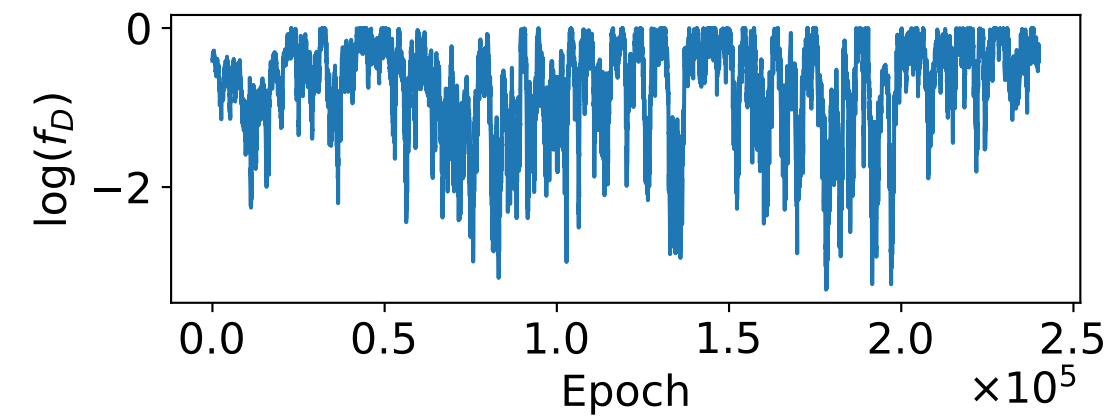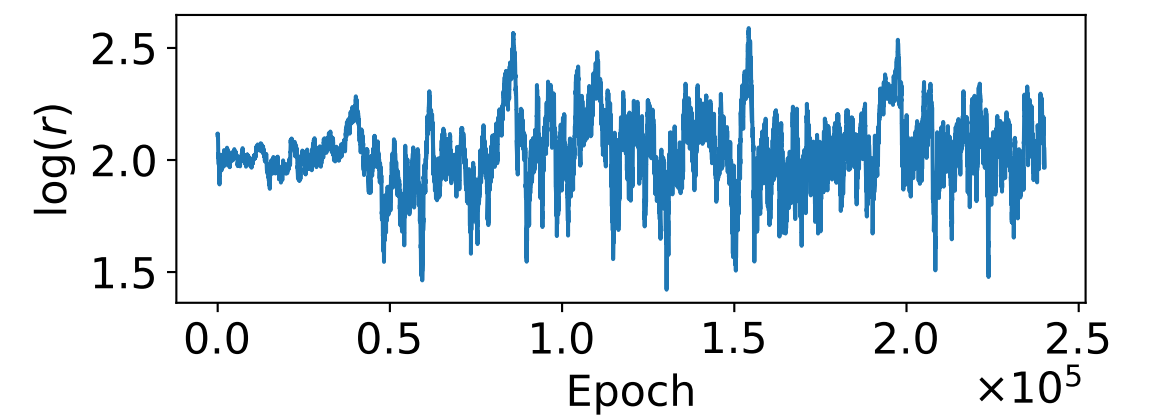

# Oregon

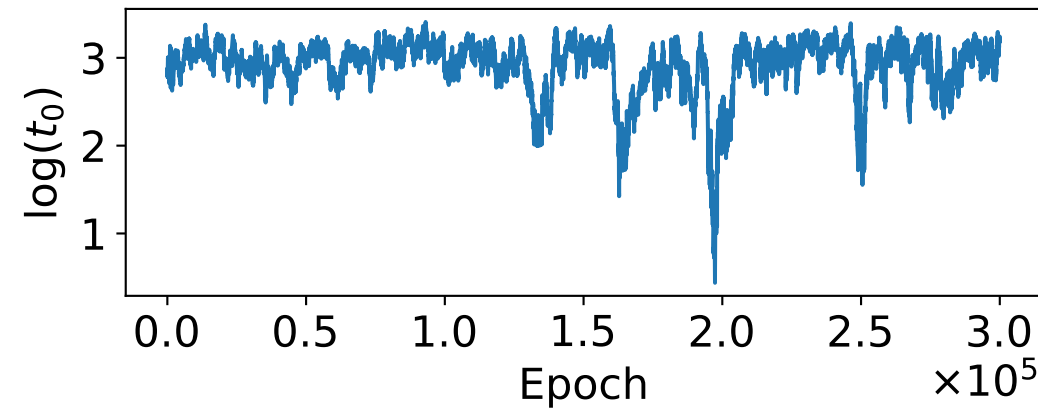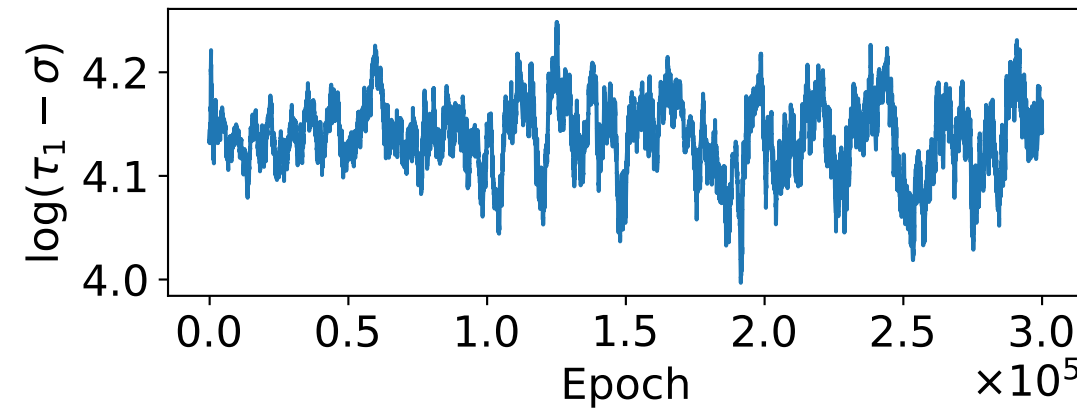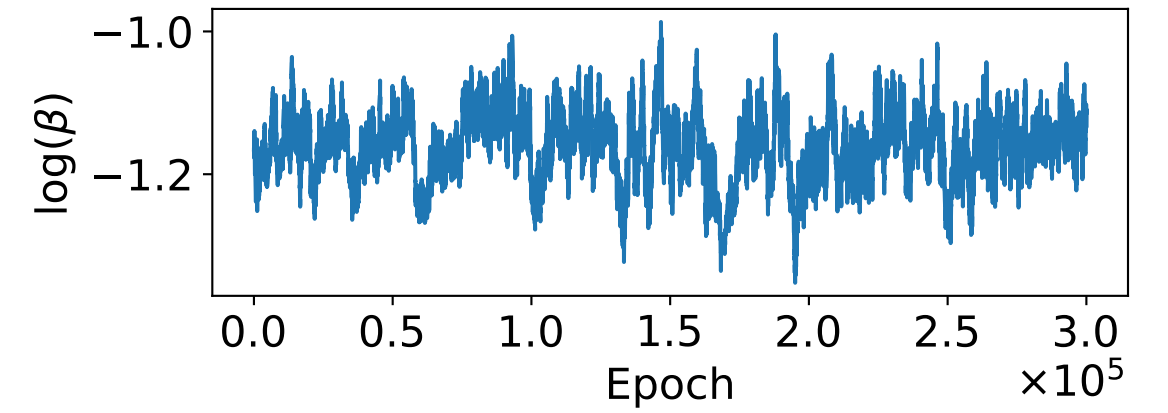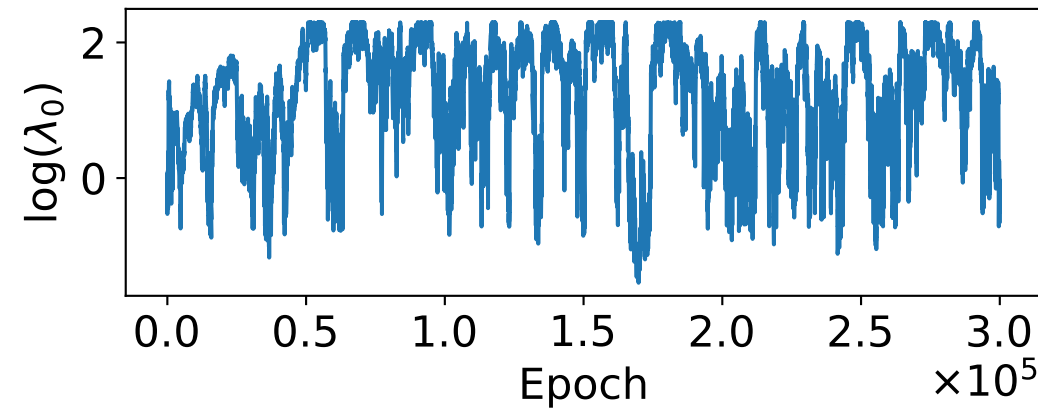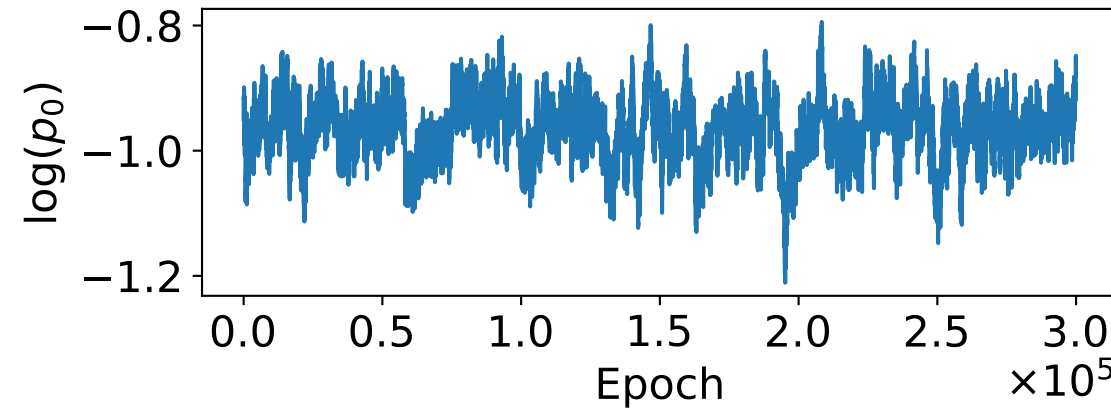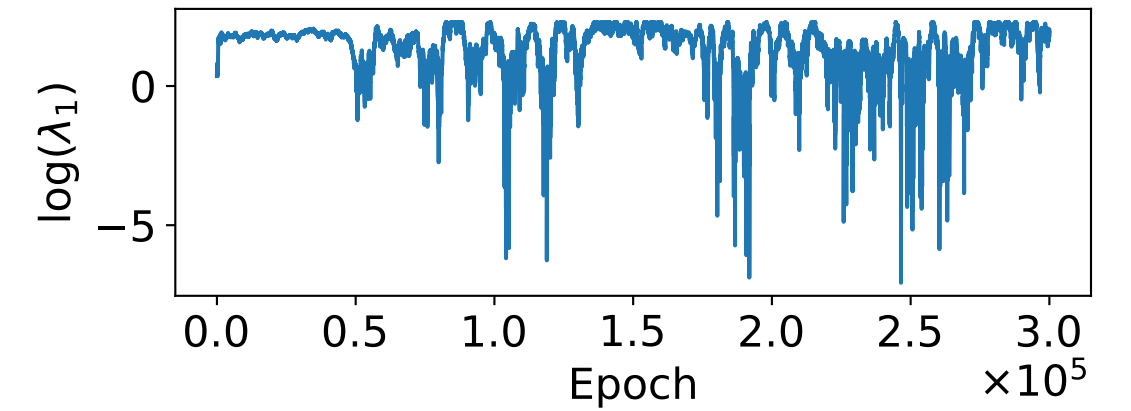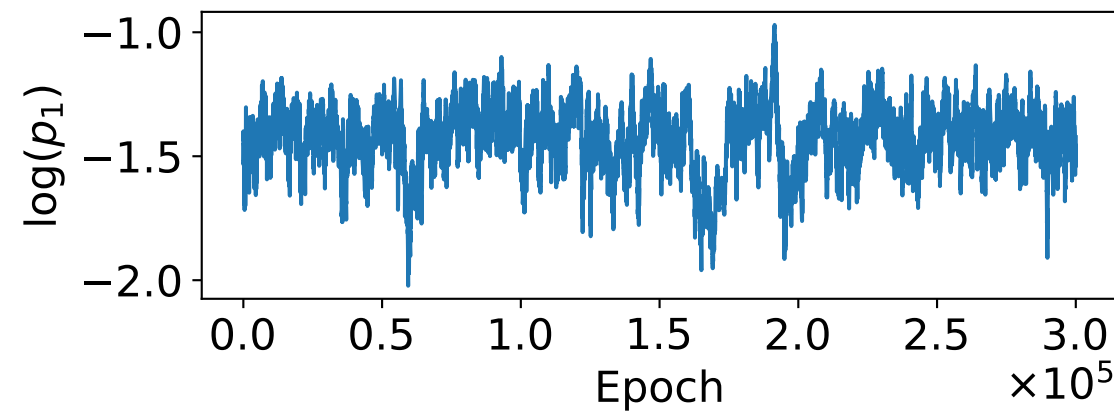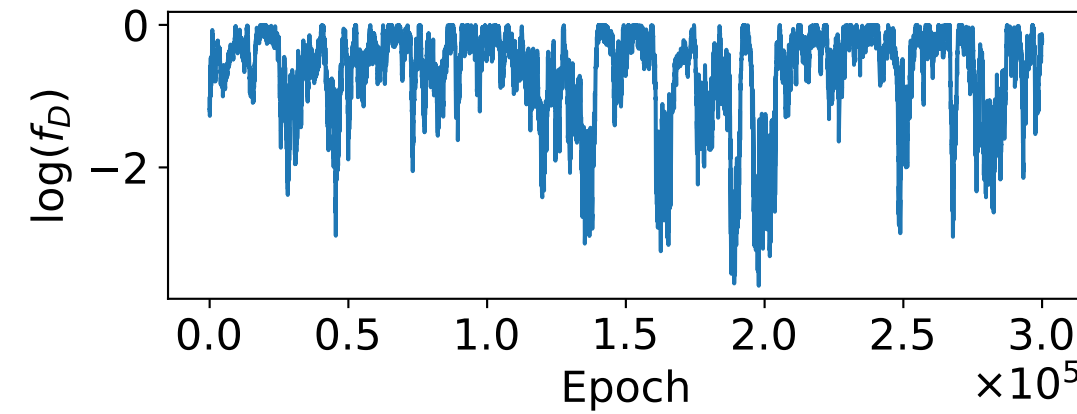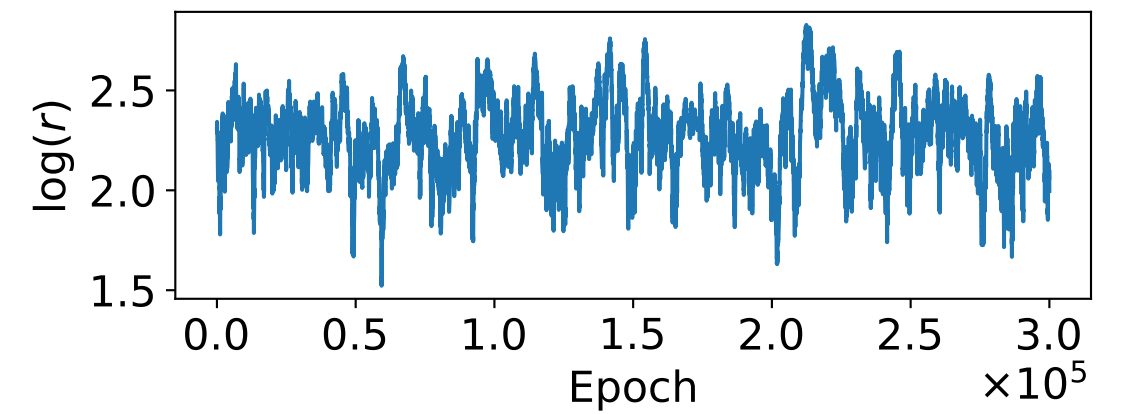



# Pennsylvania

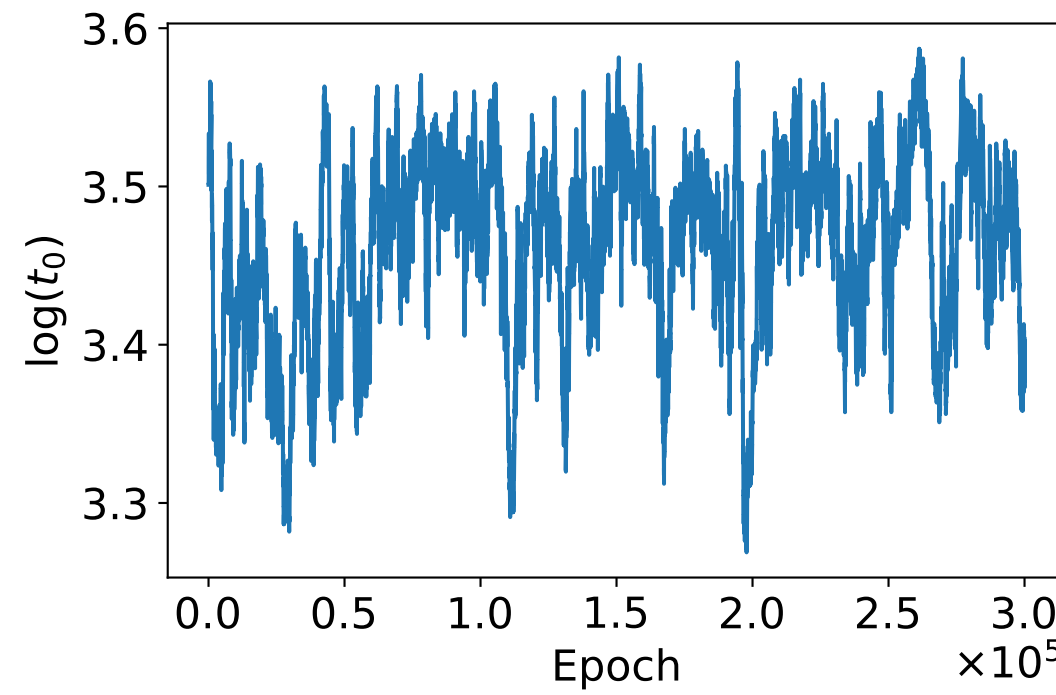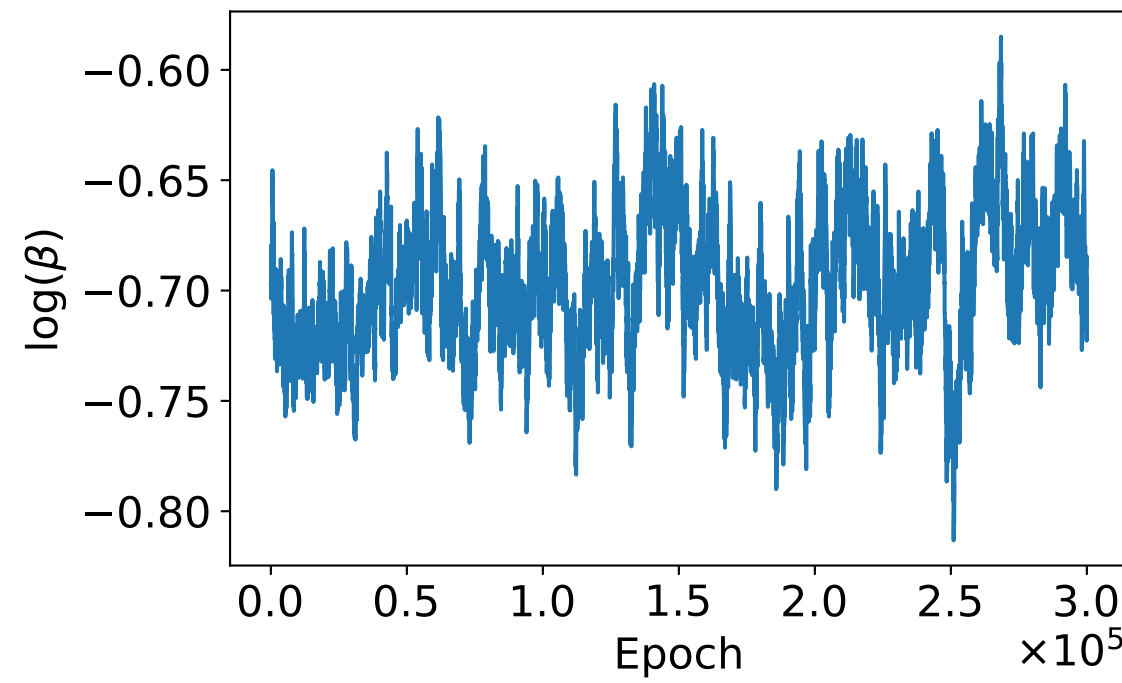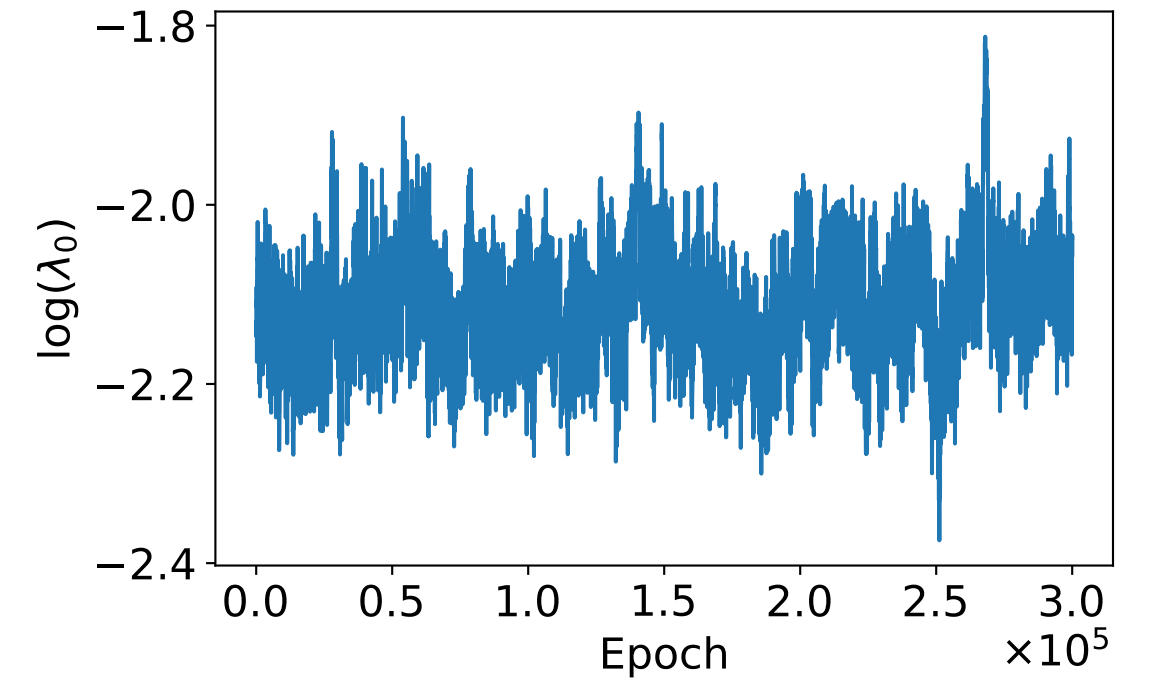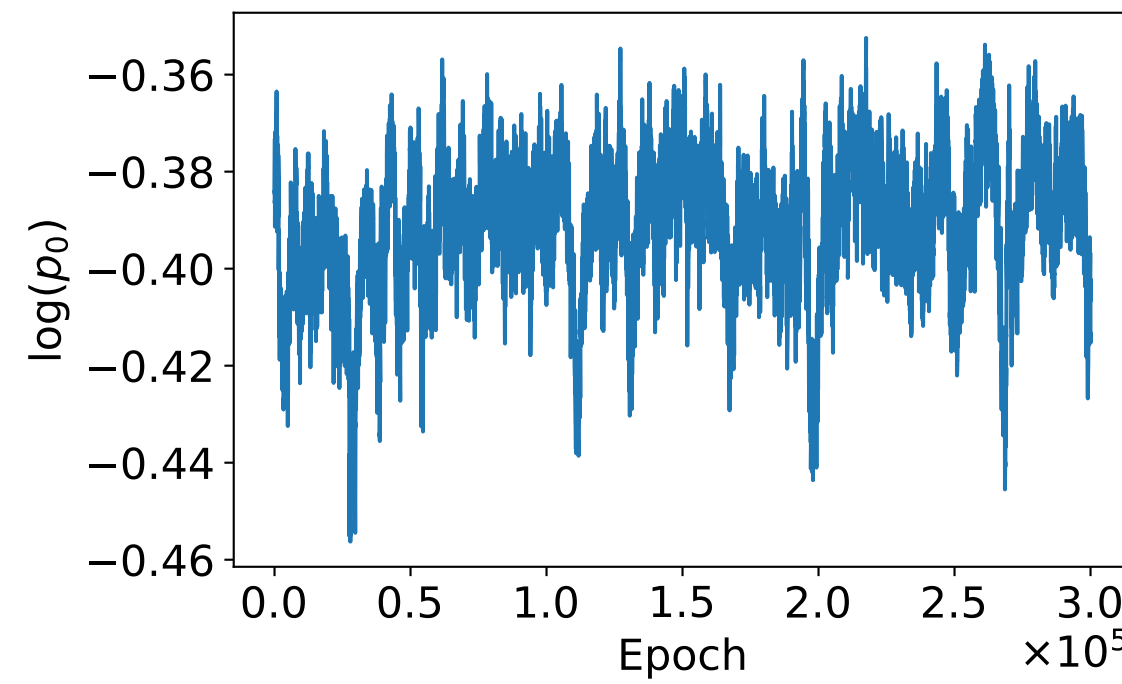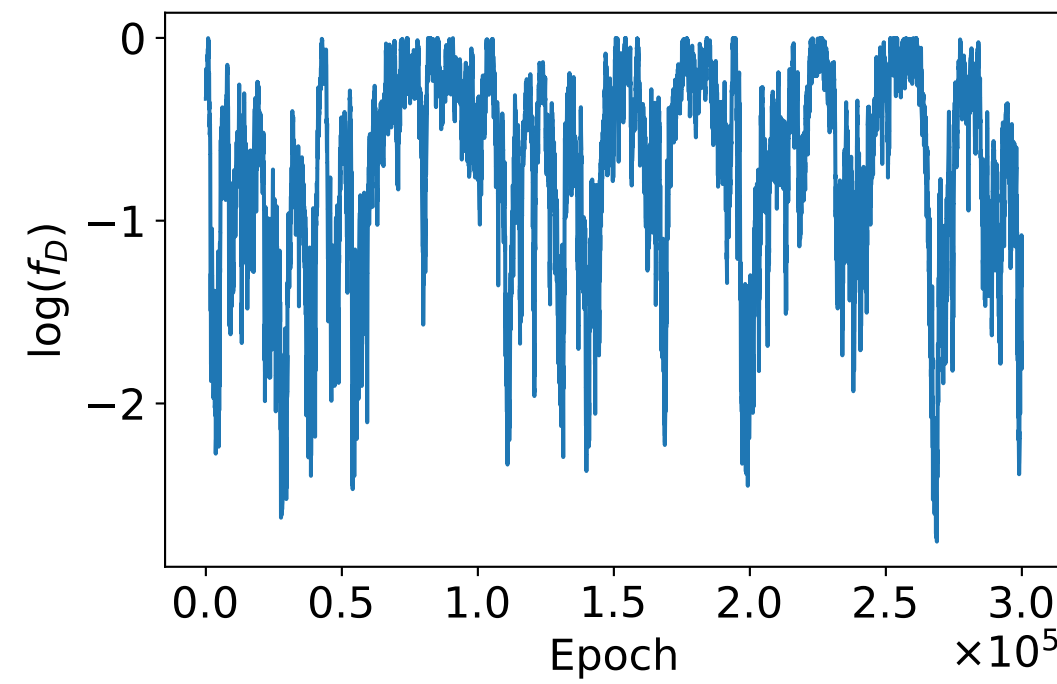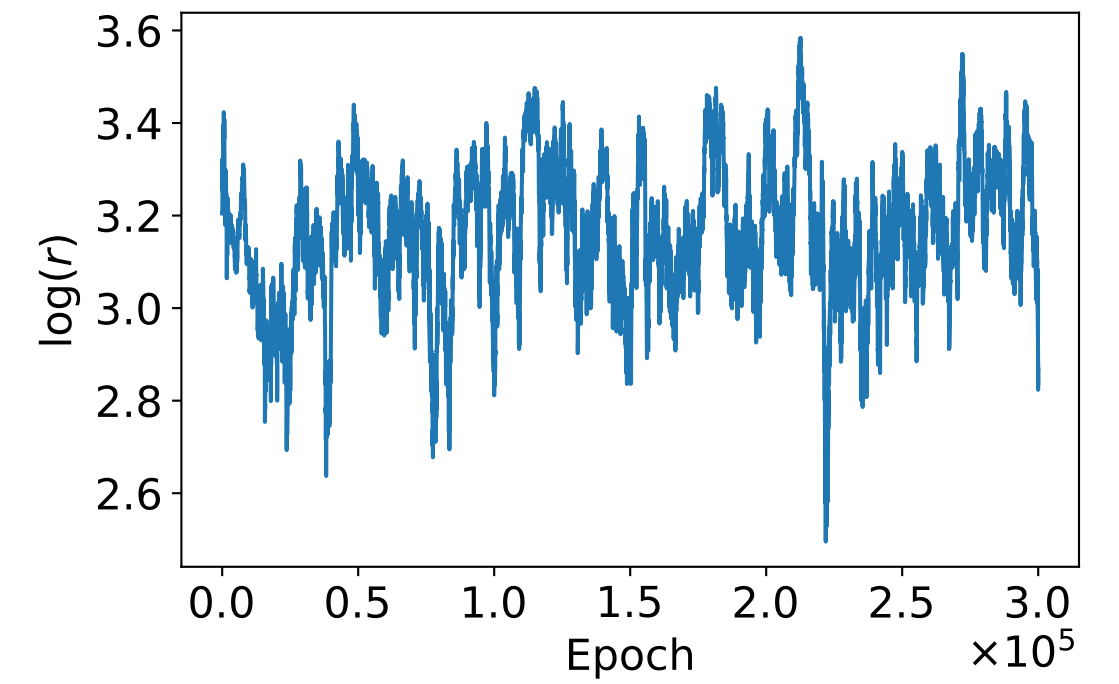

# Rhode Island

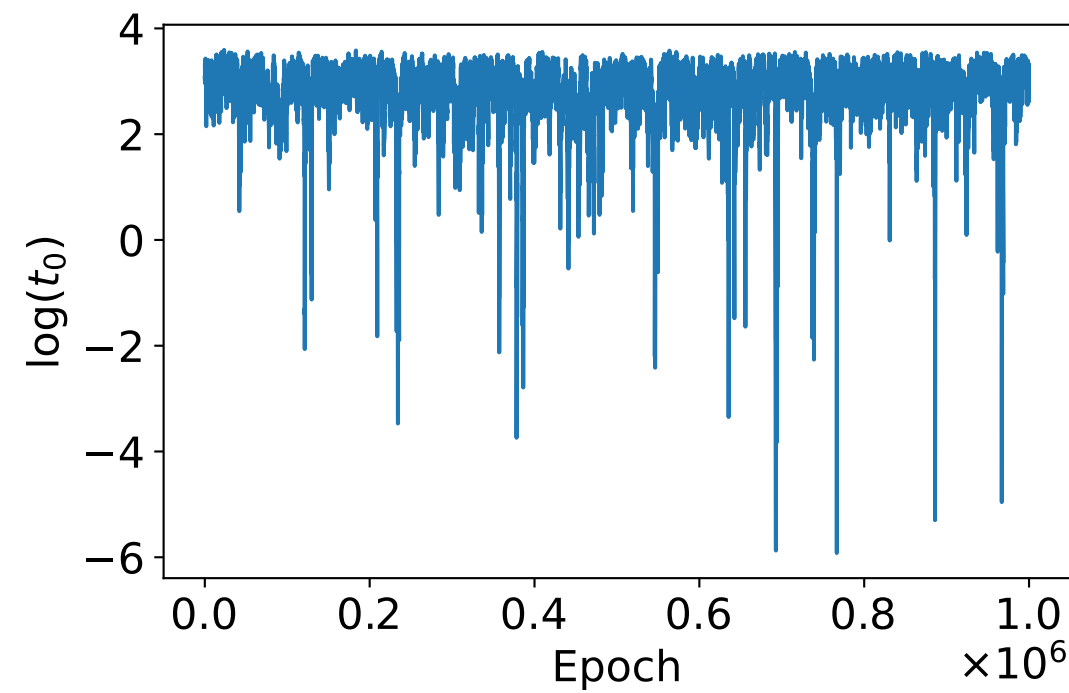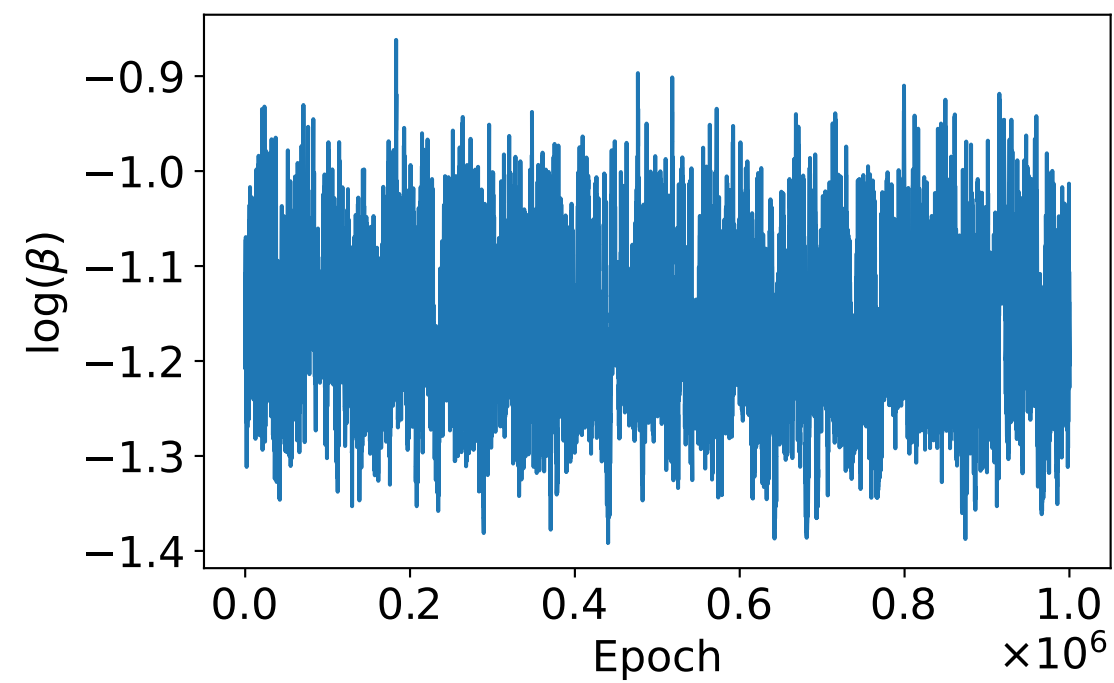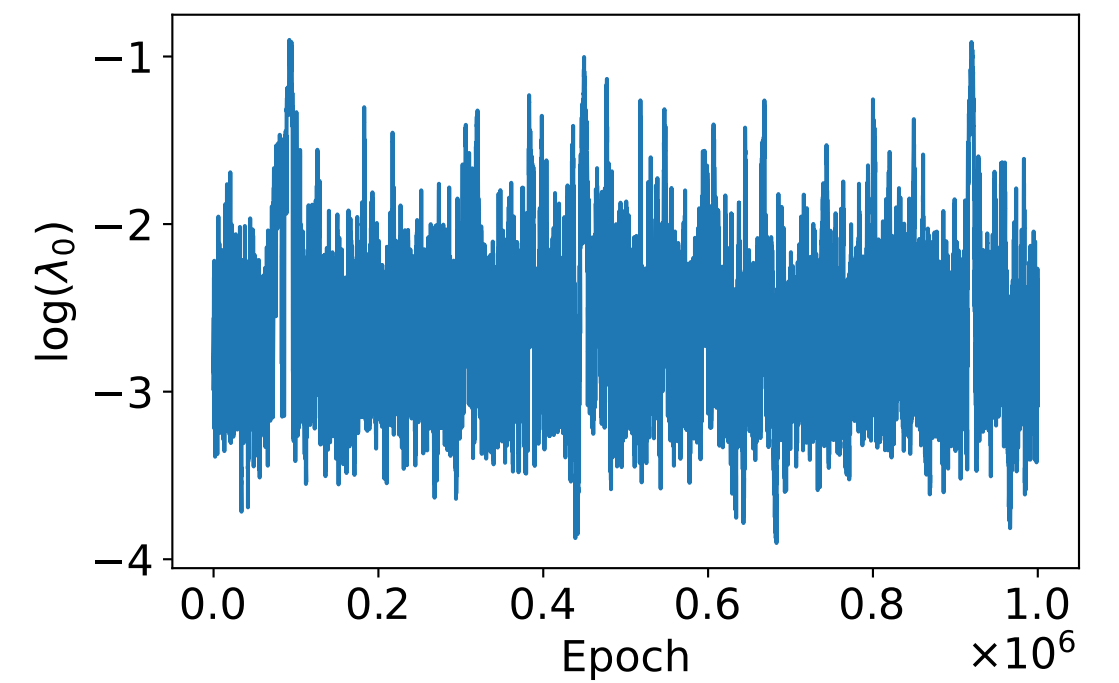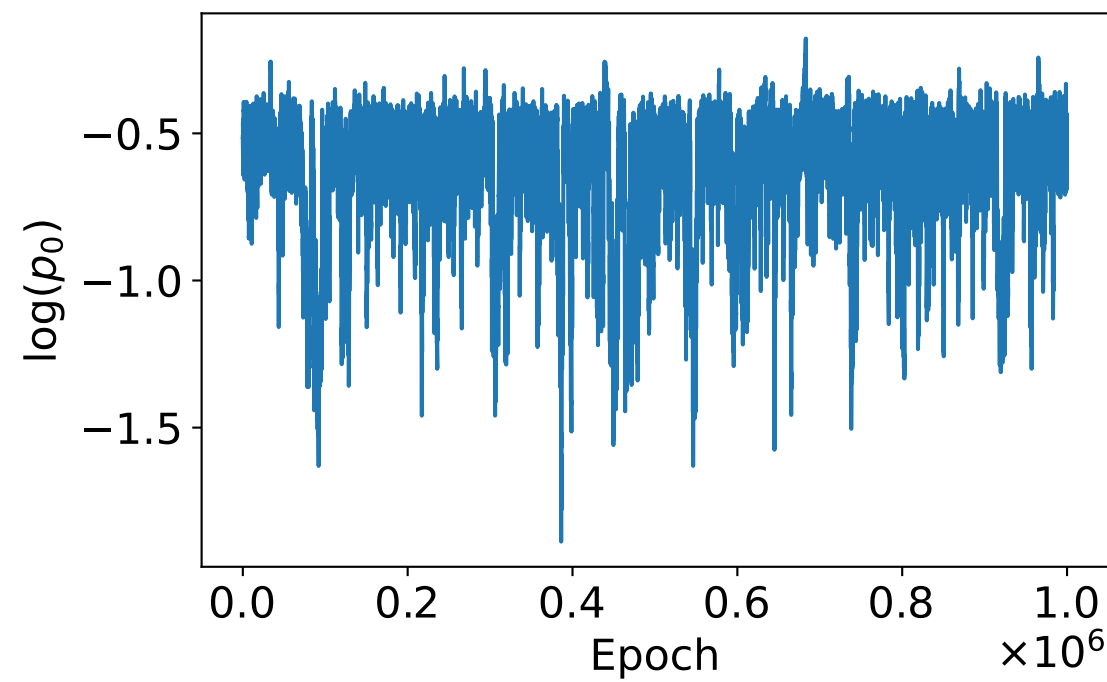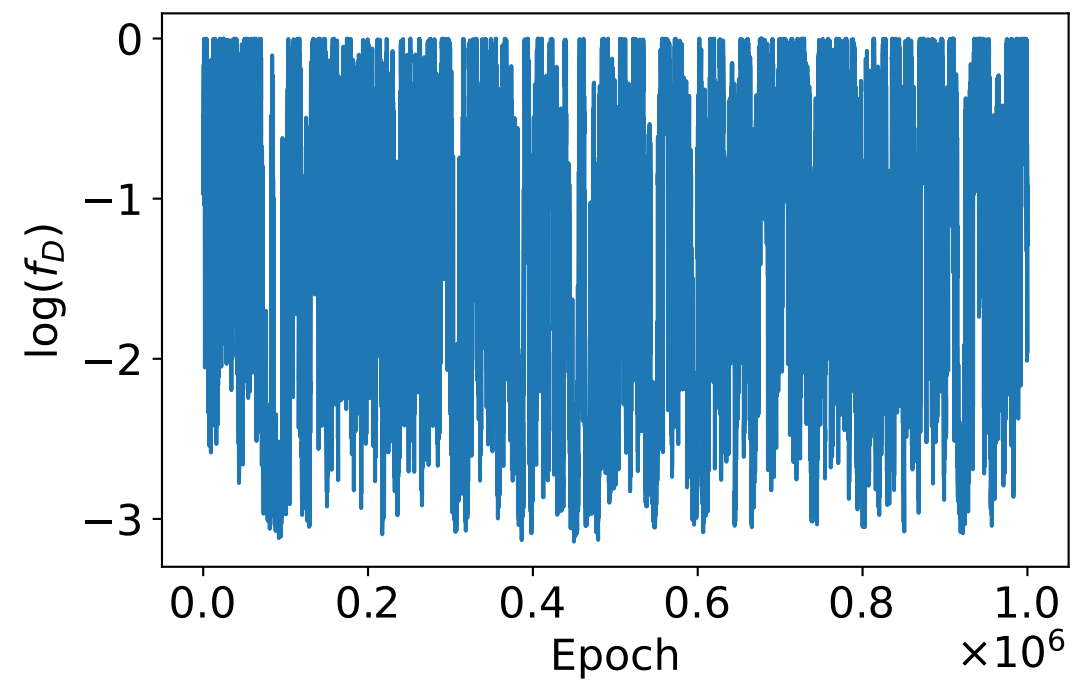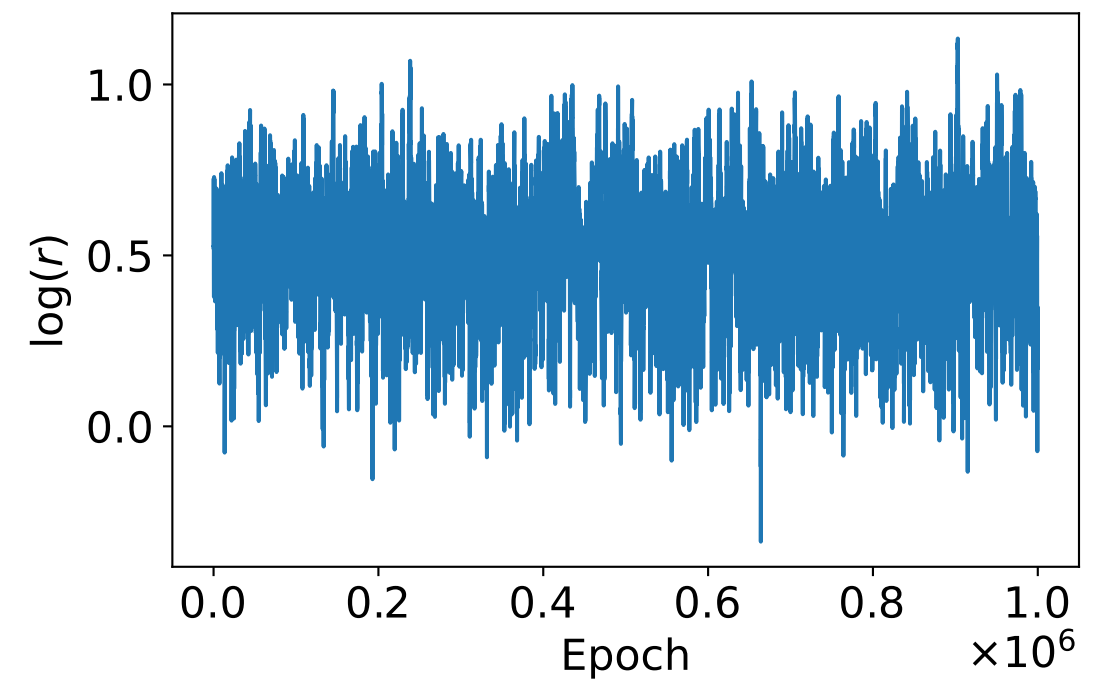

# South Carolina

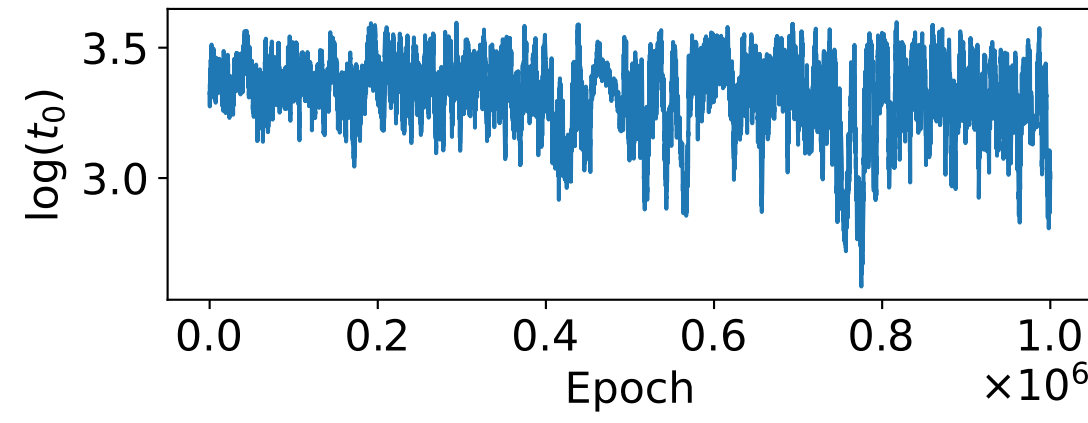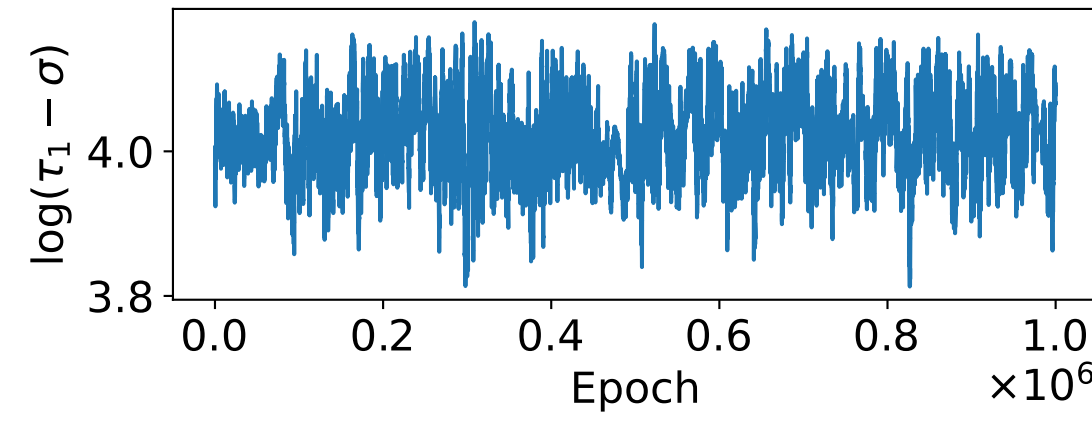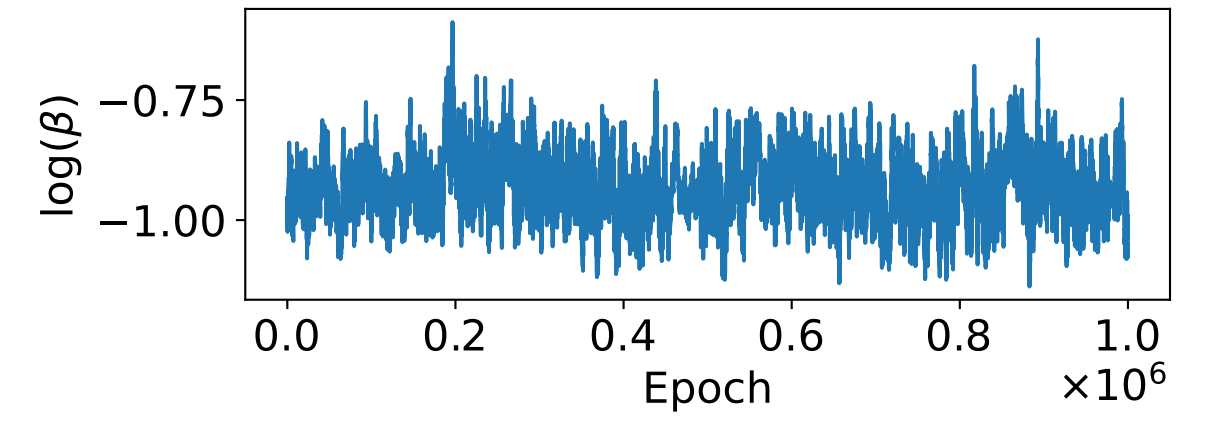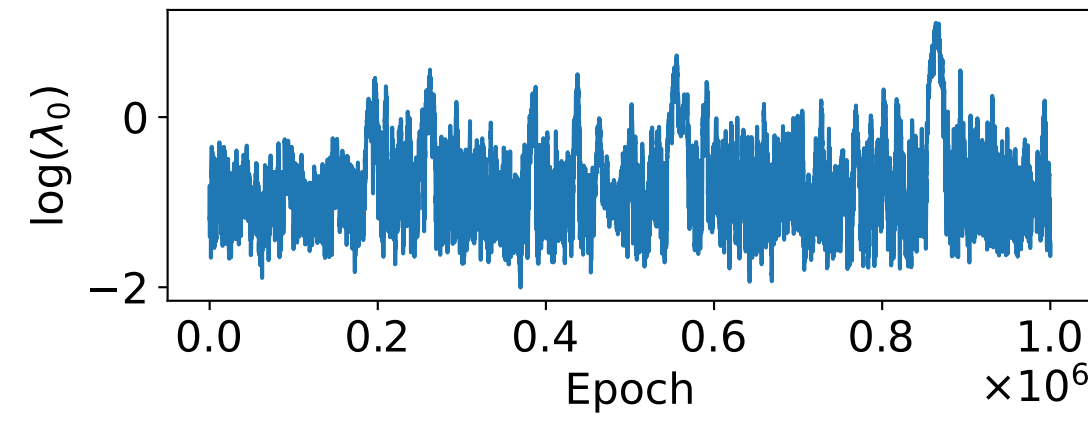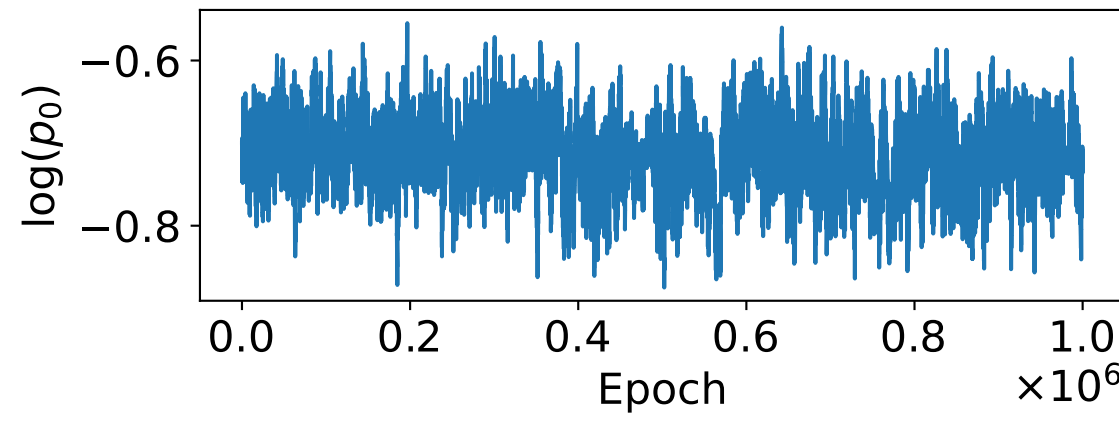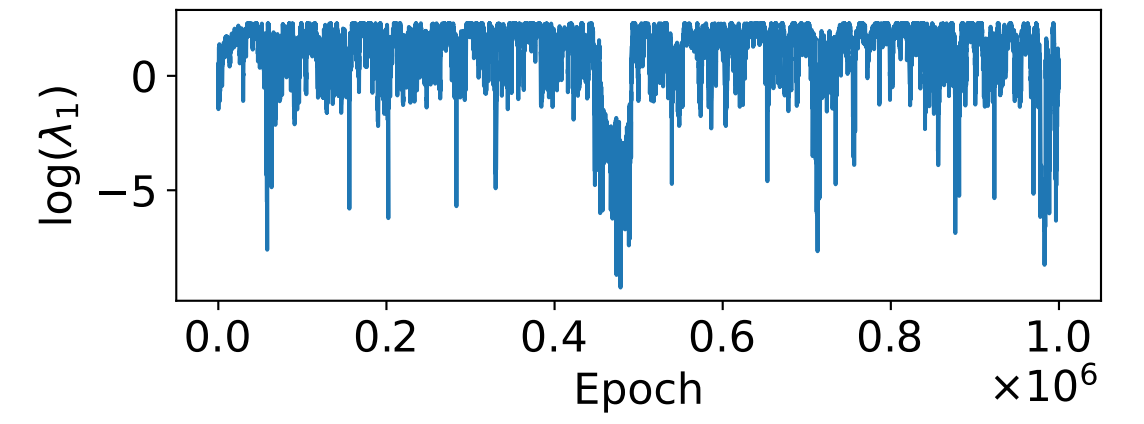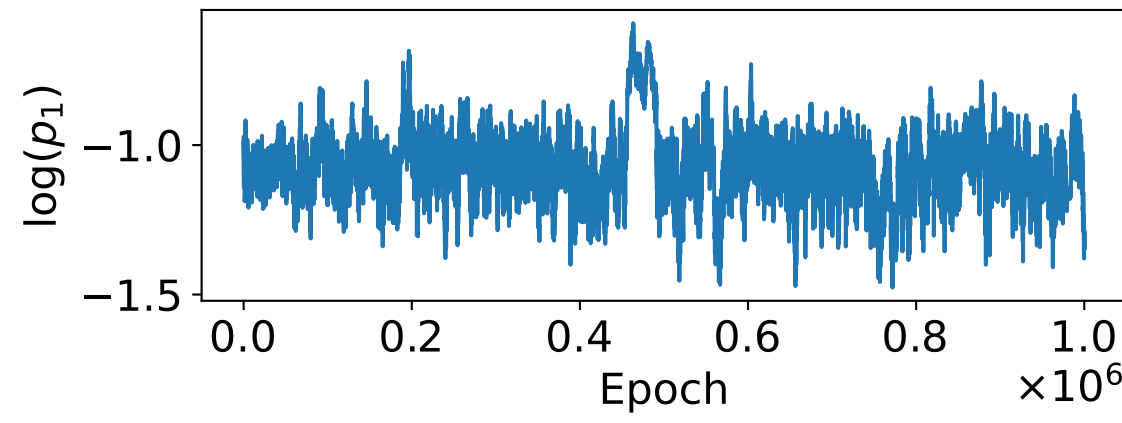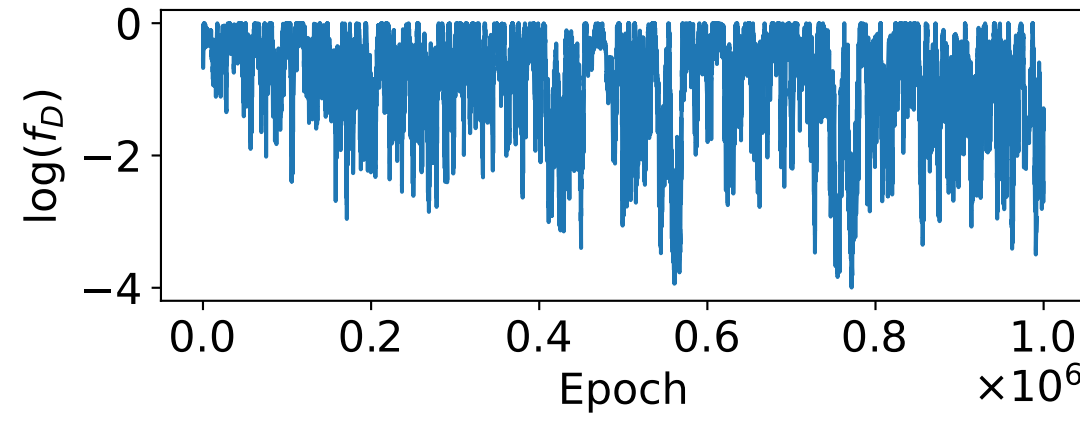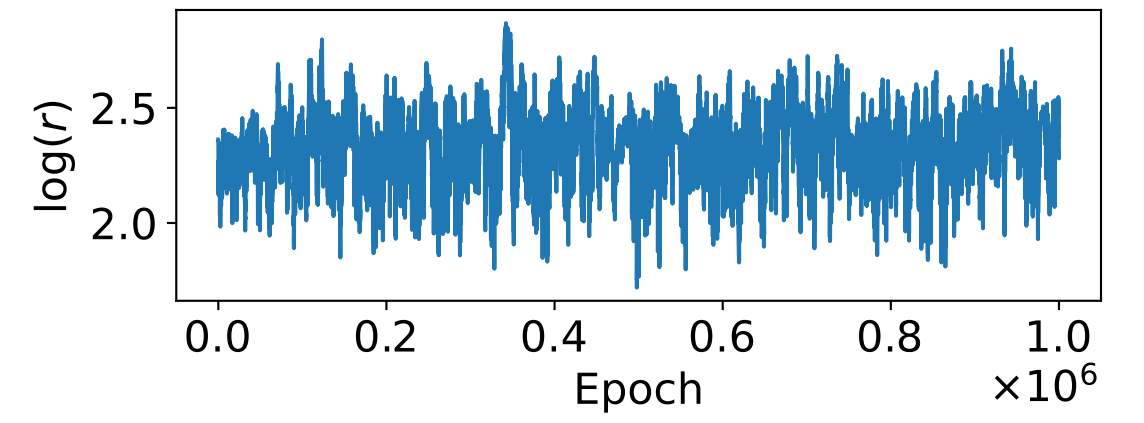

# South Dakota

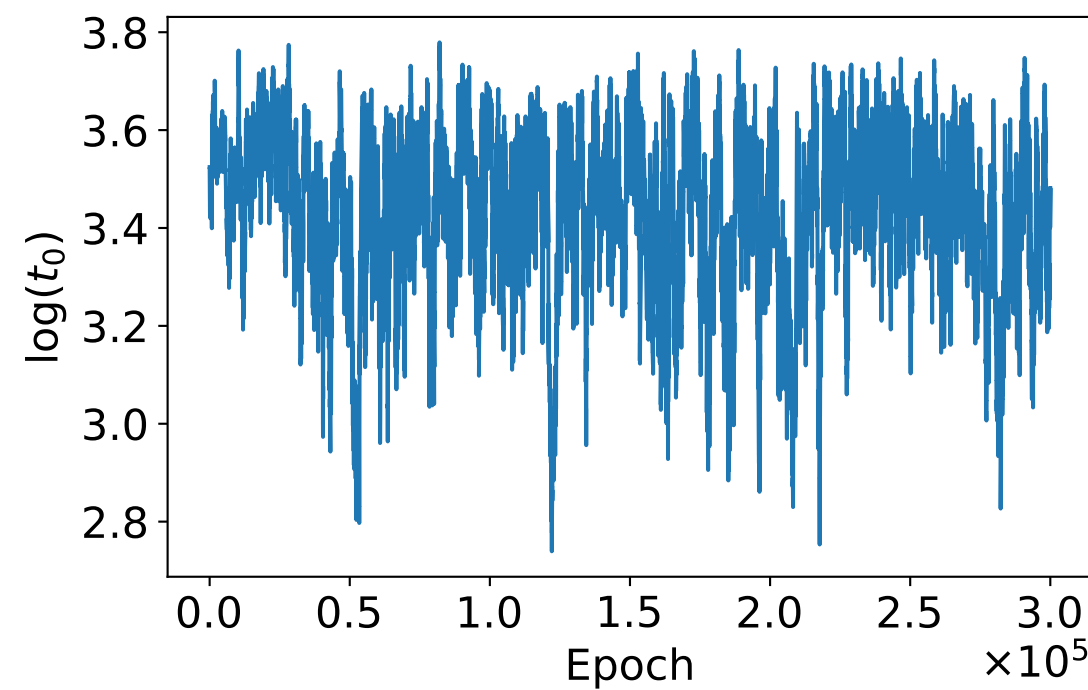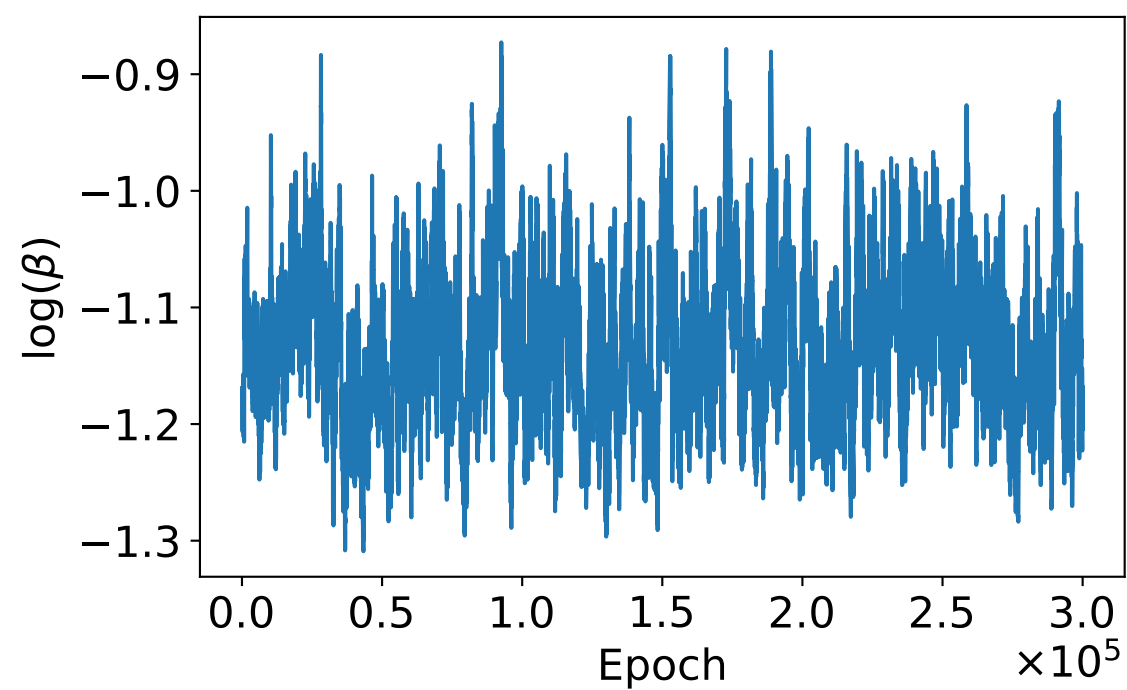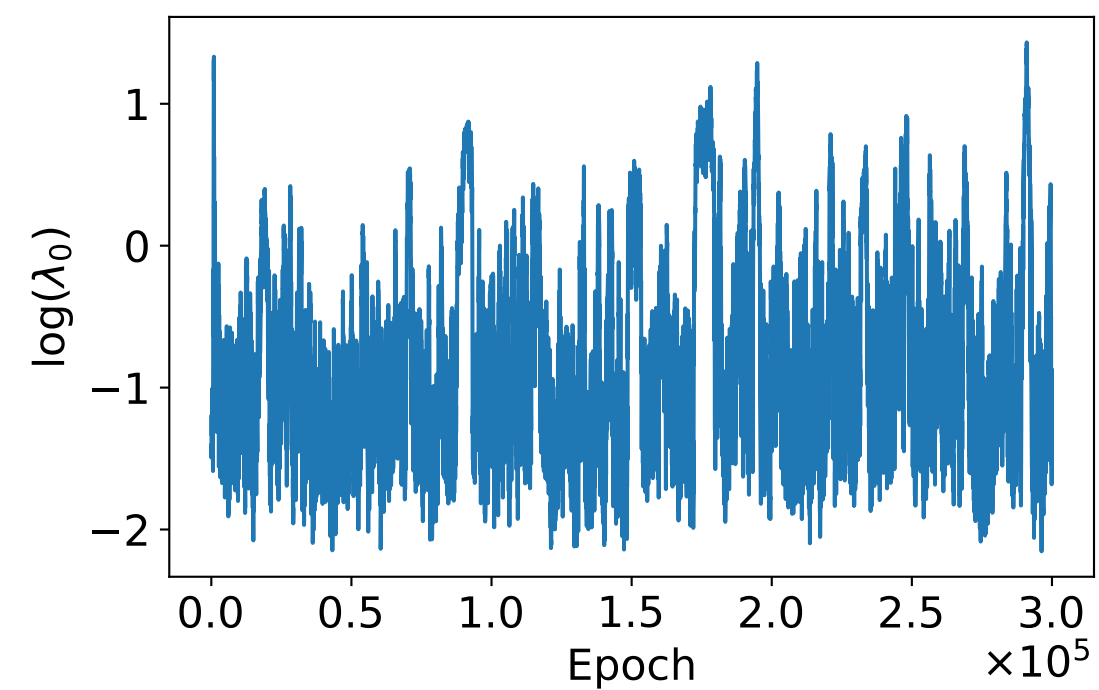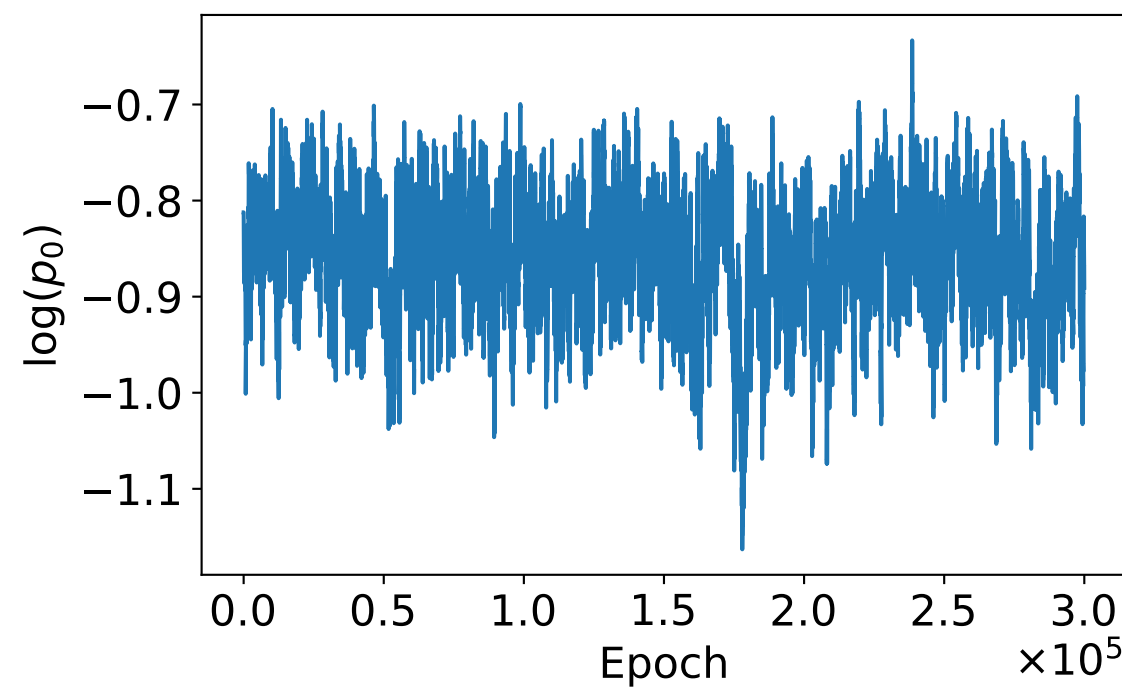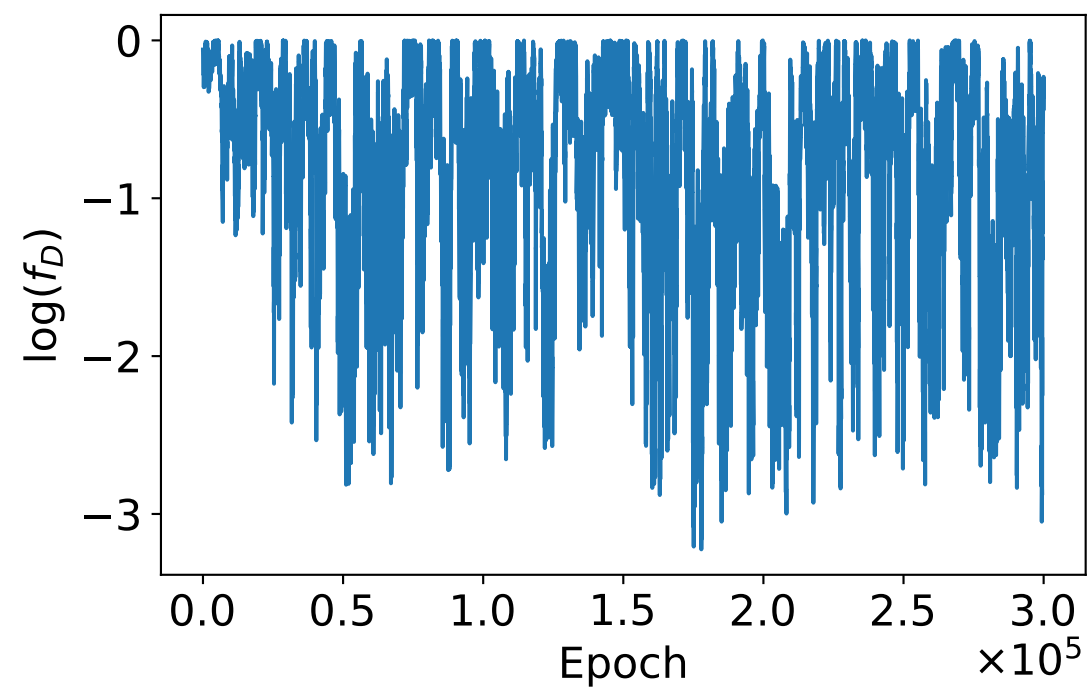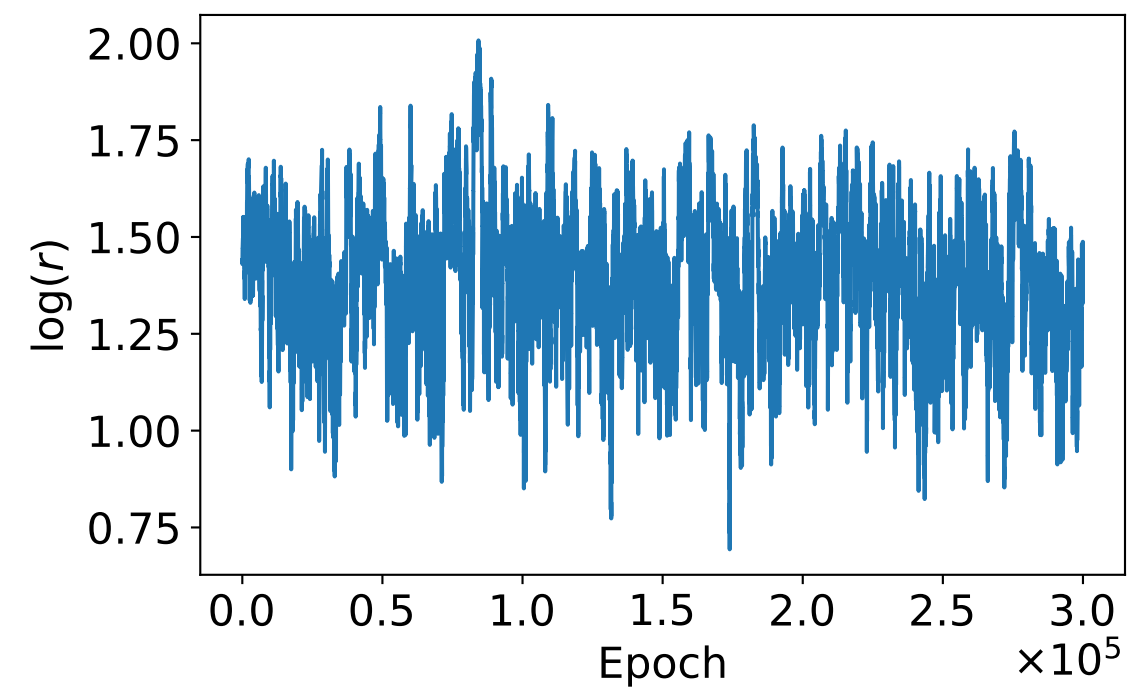

# Tennessee

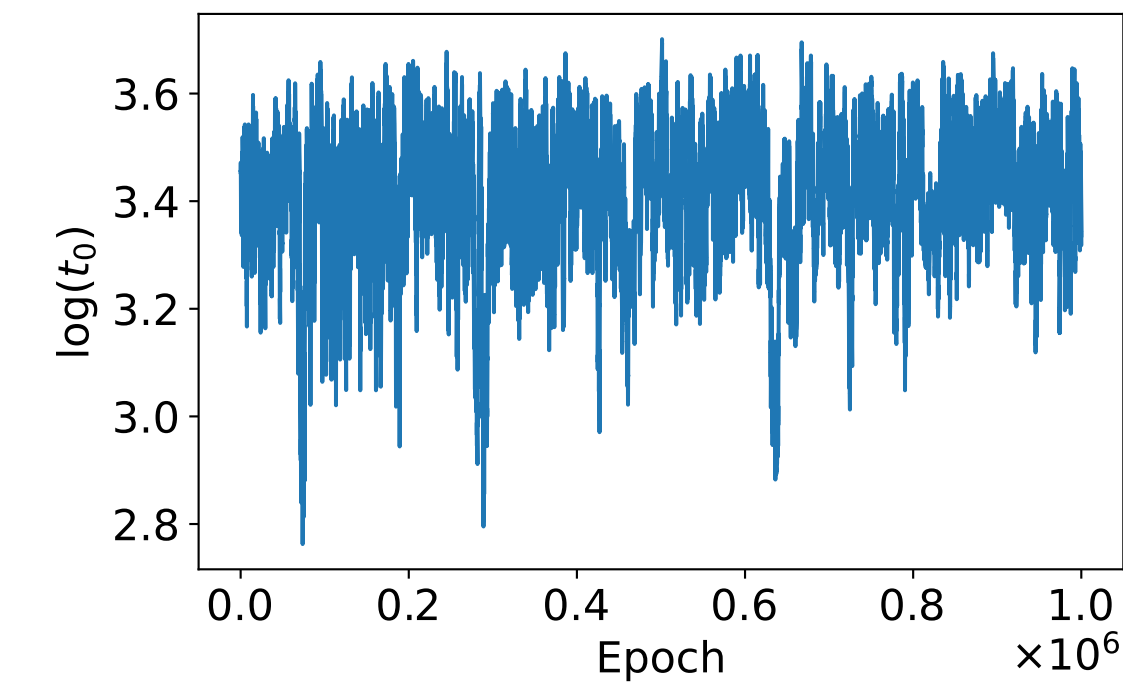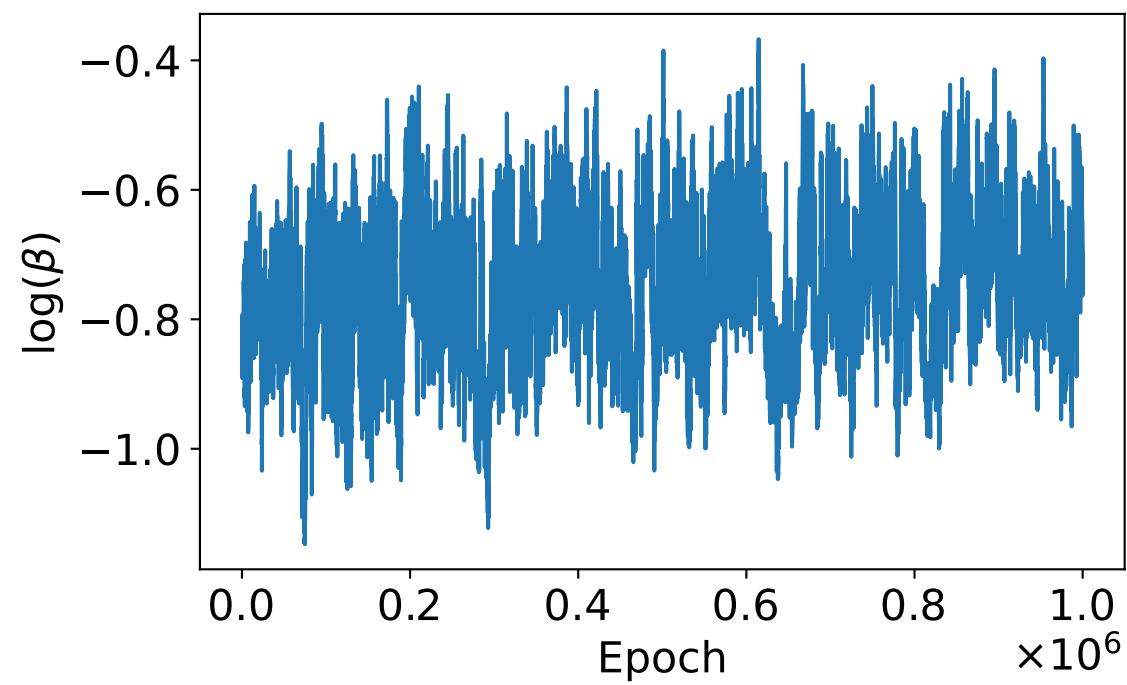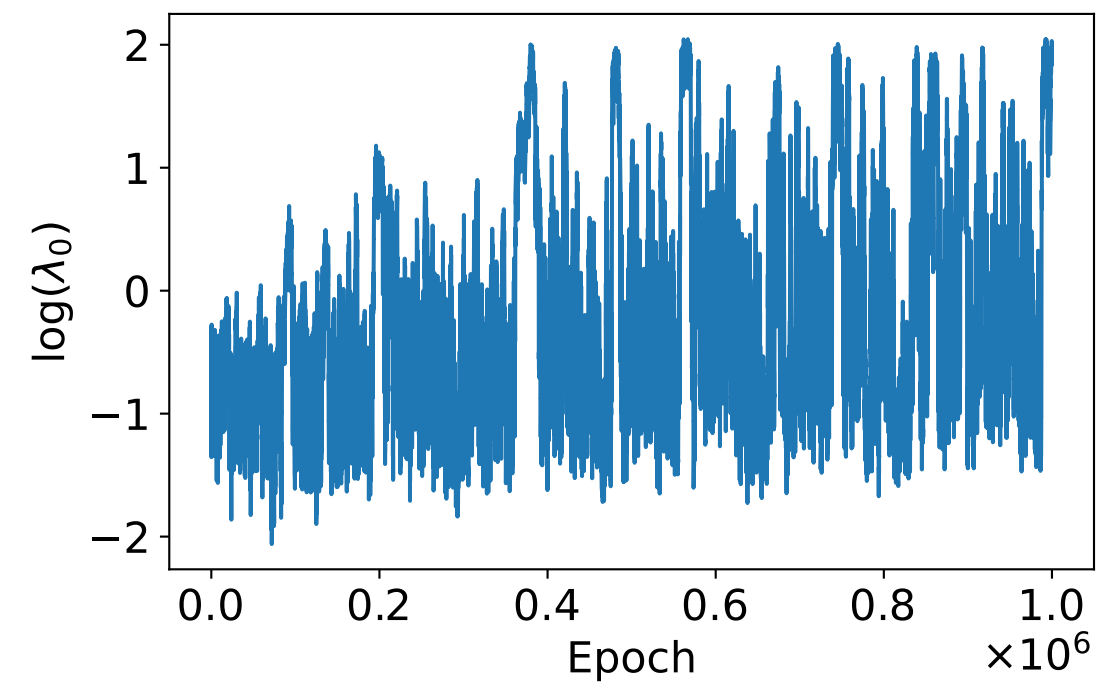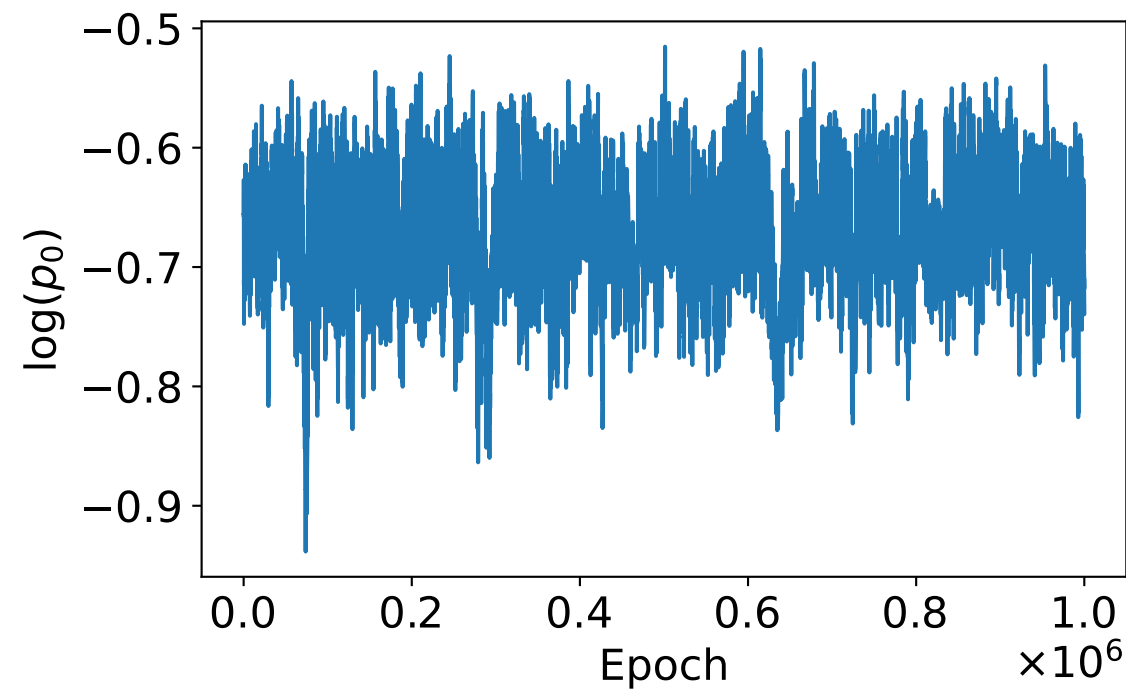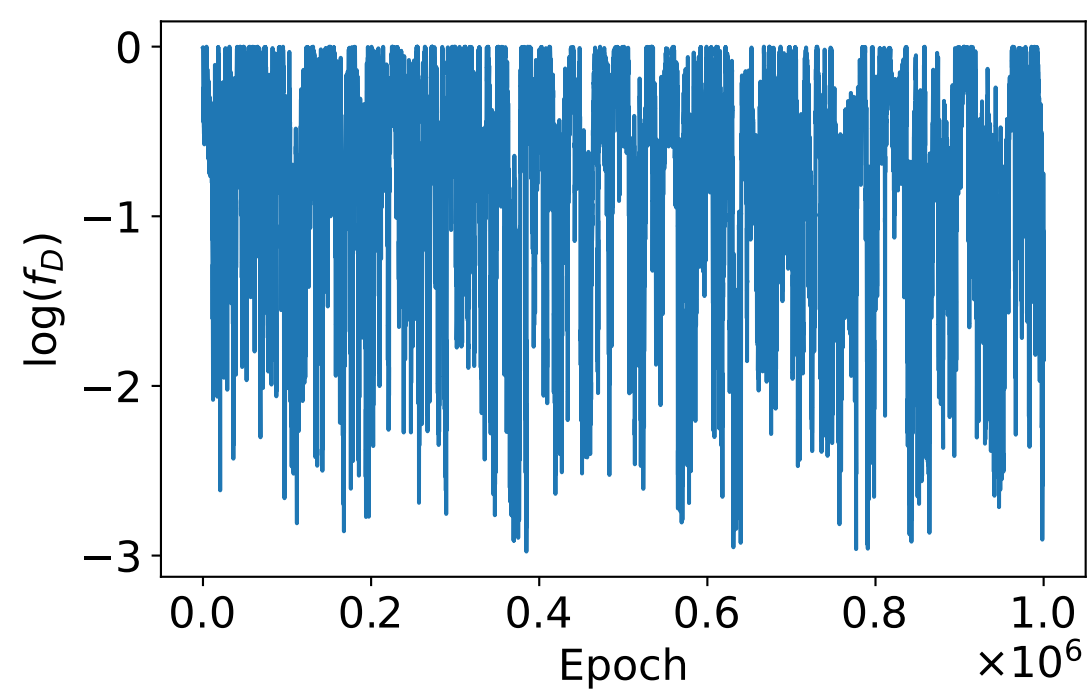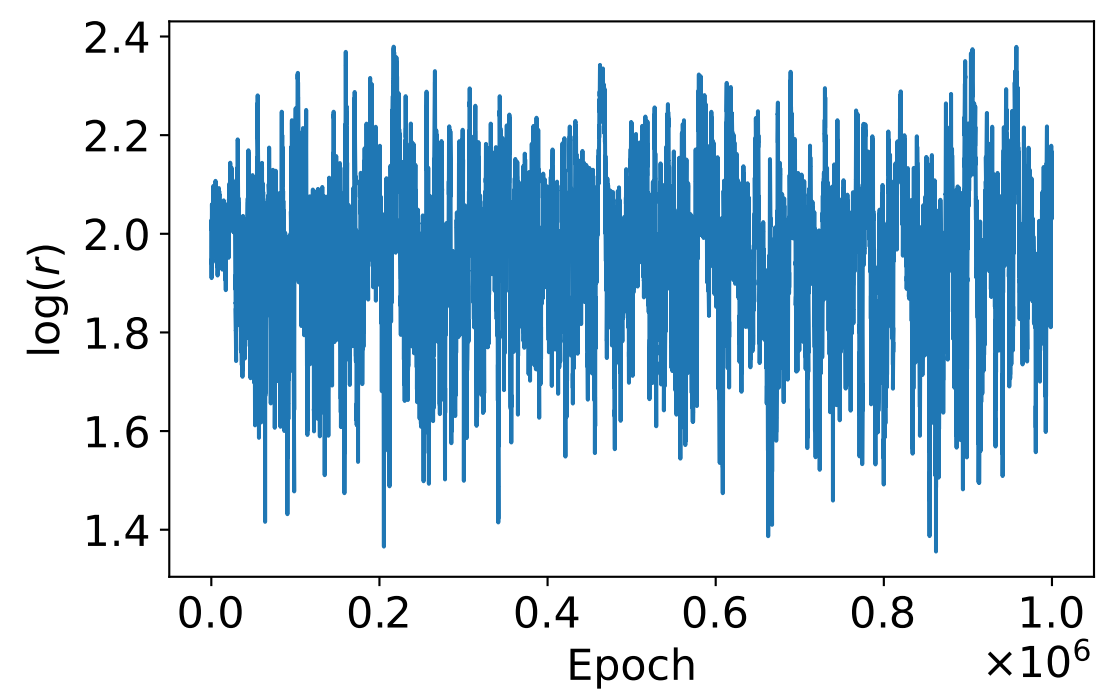

Texas

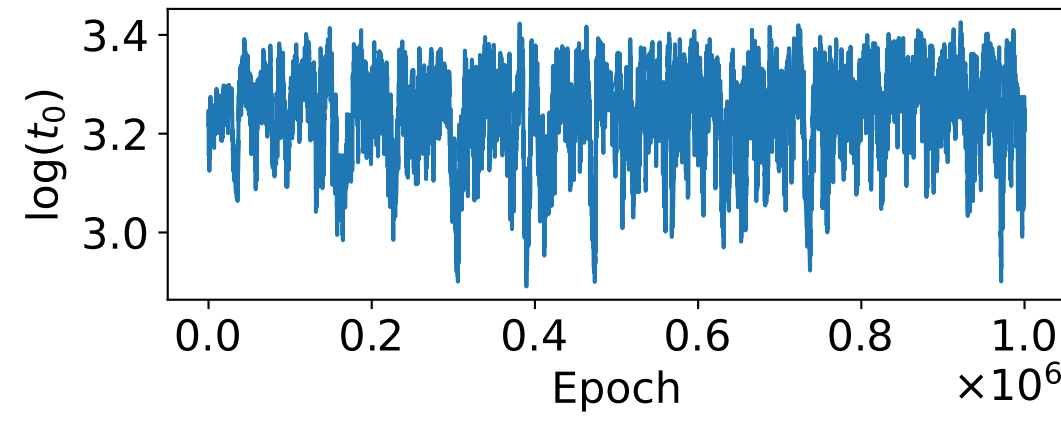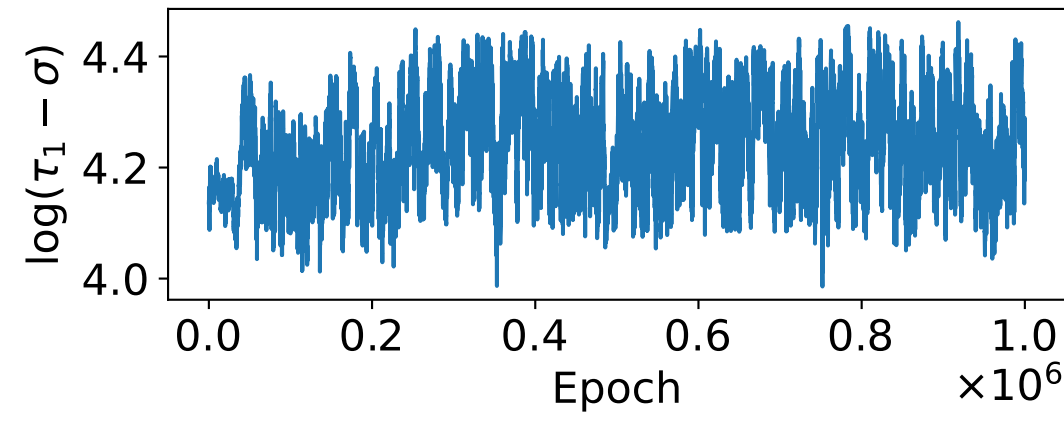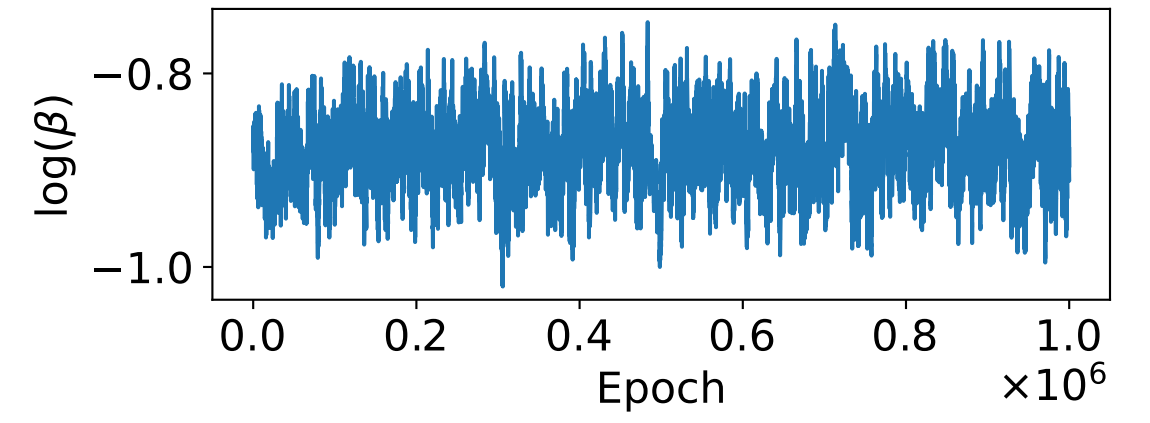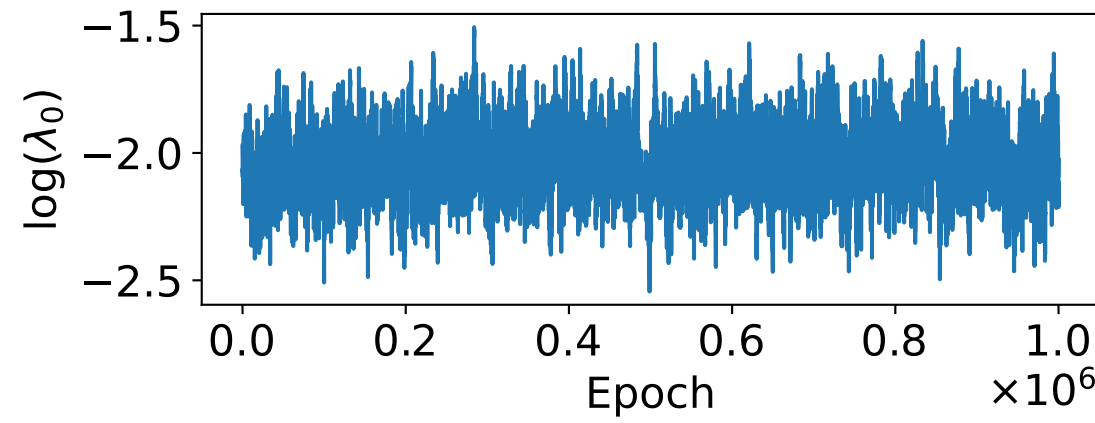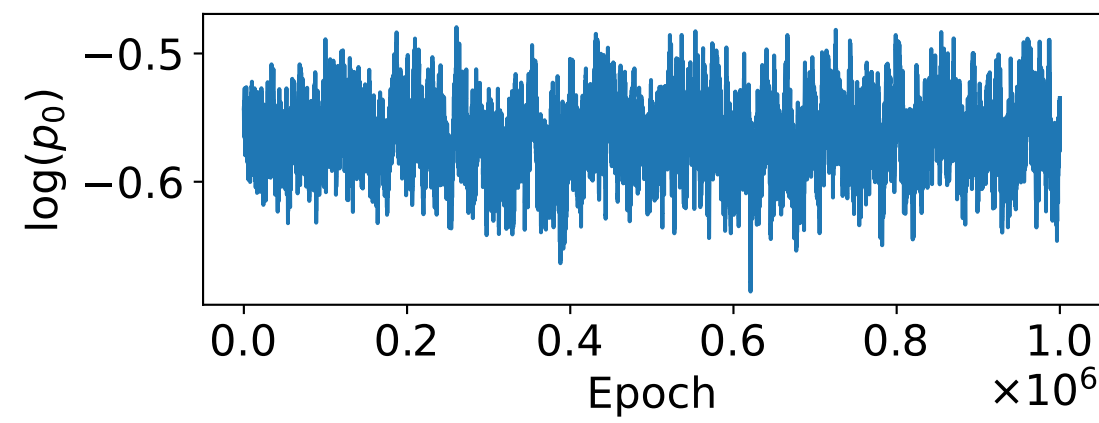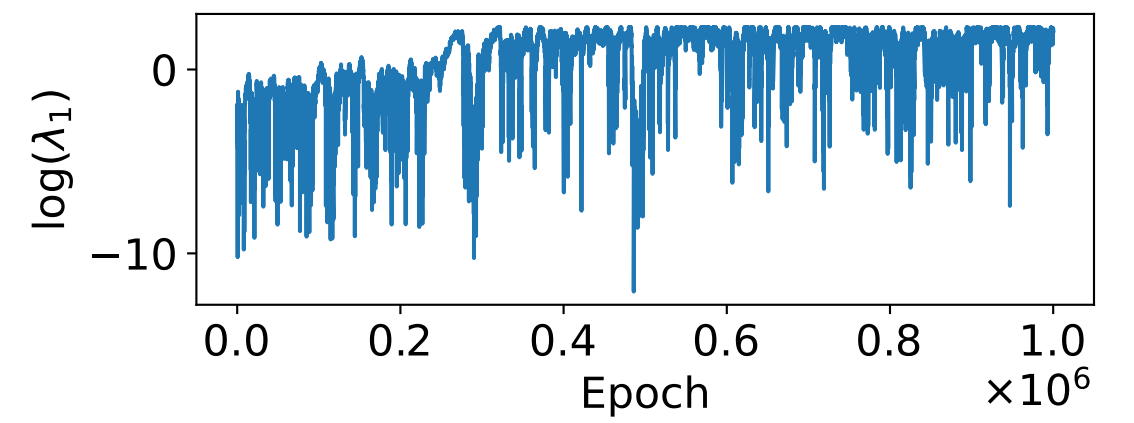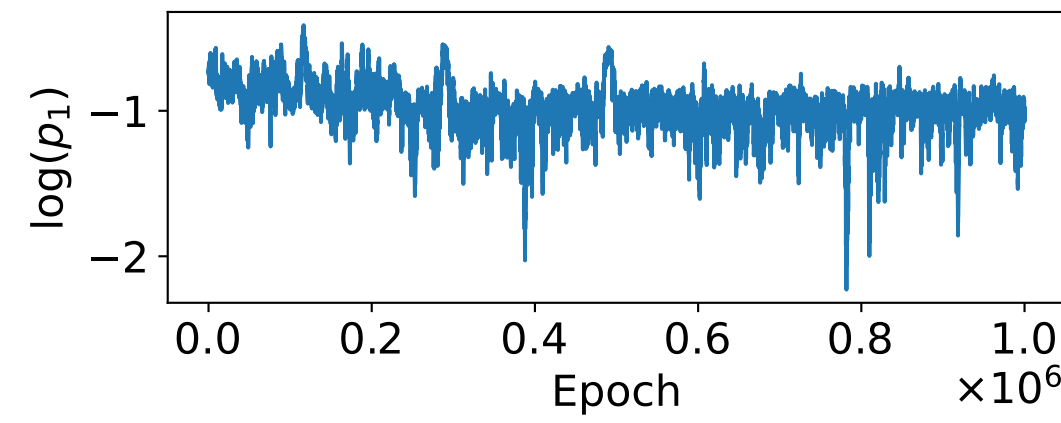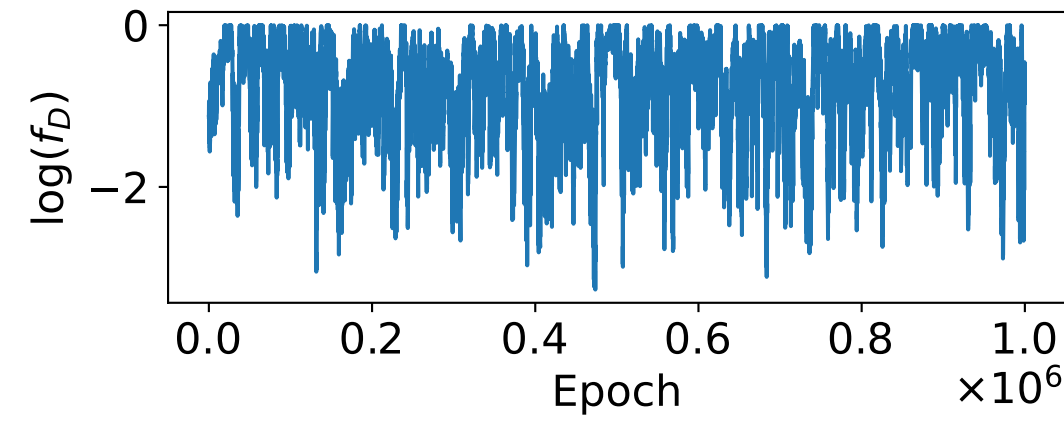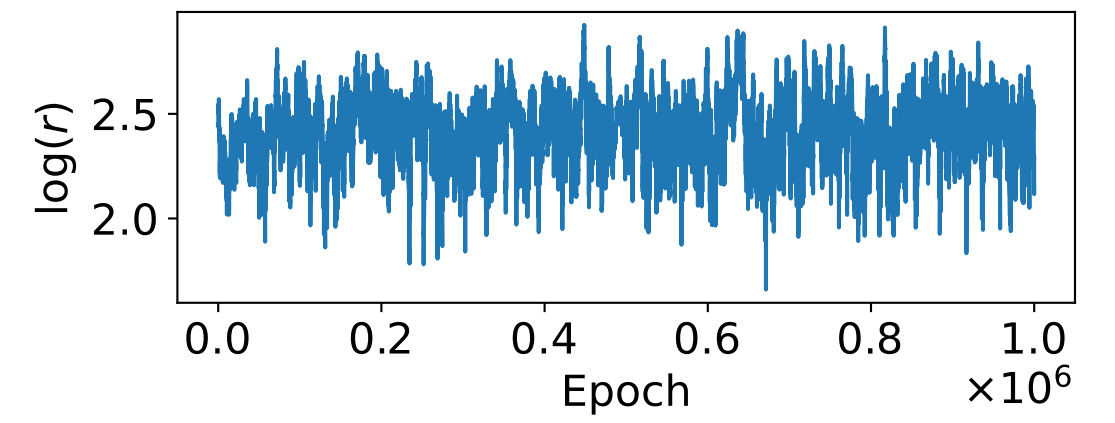

## Utah

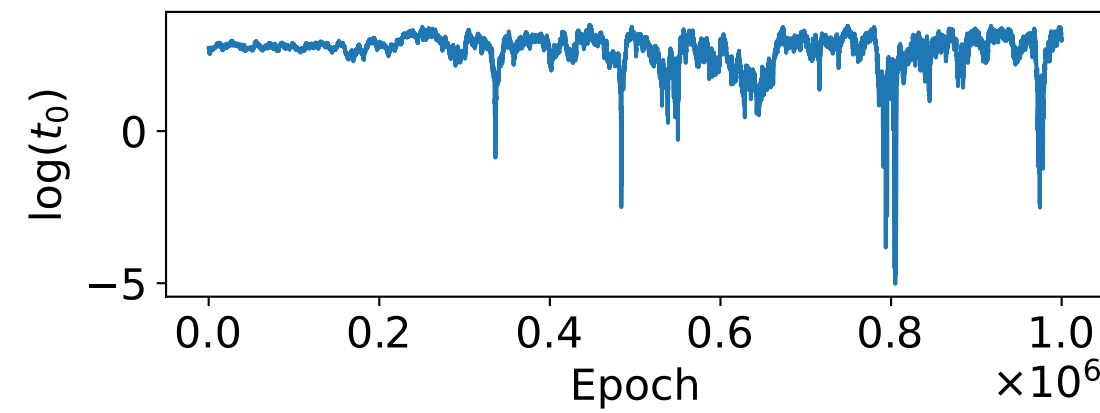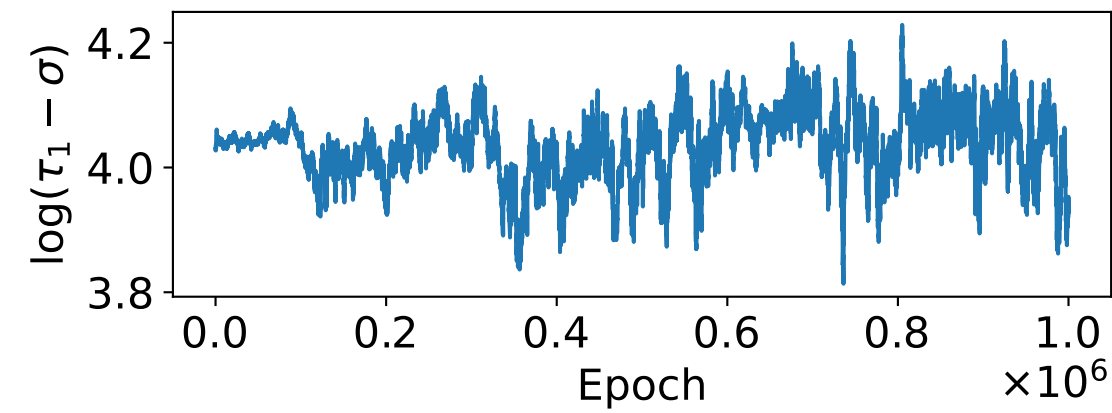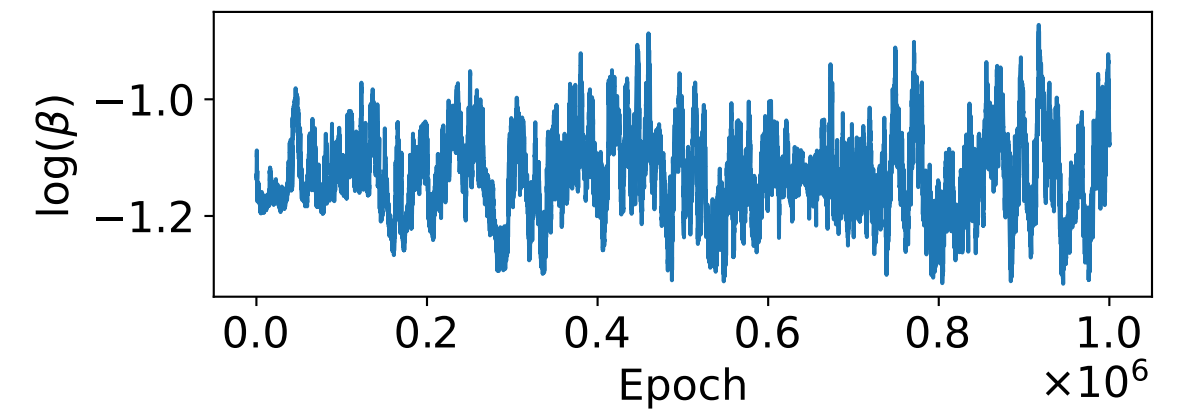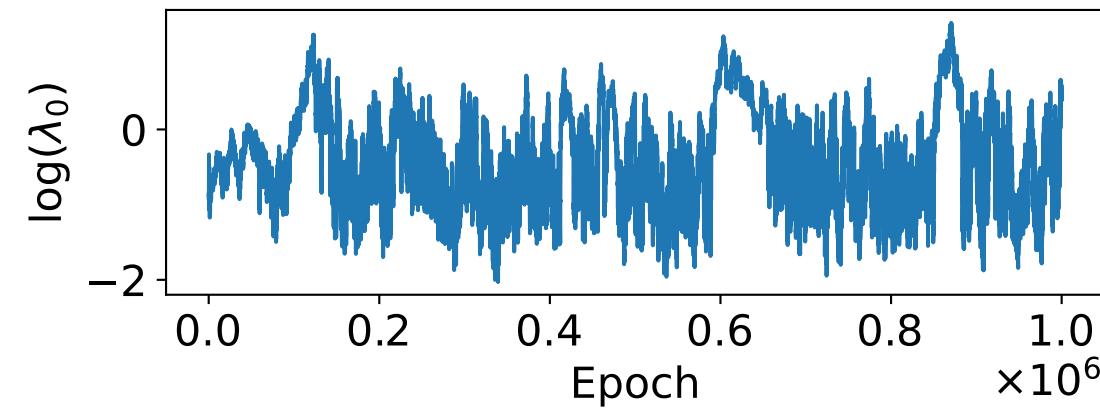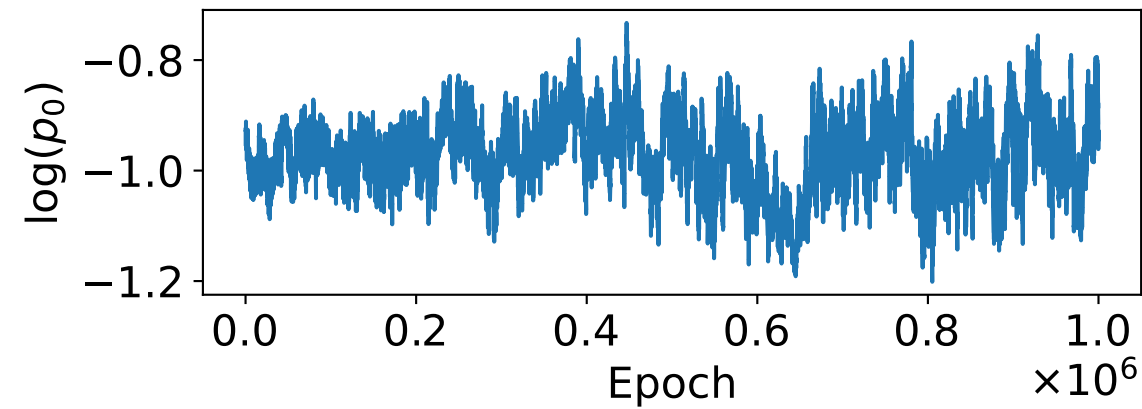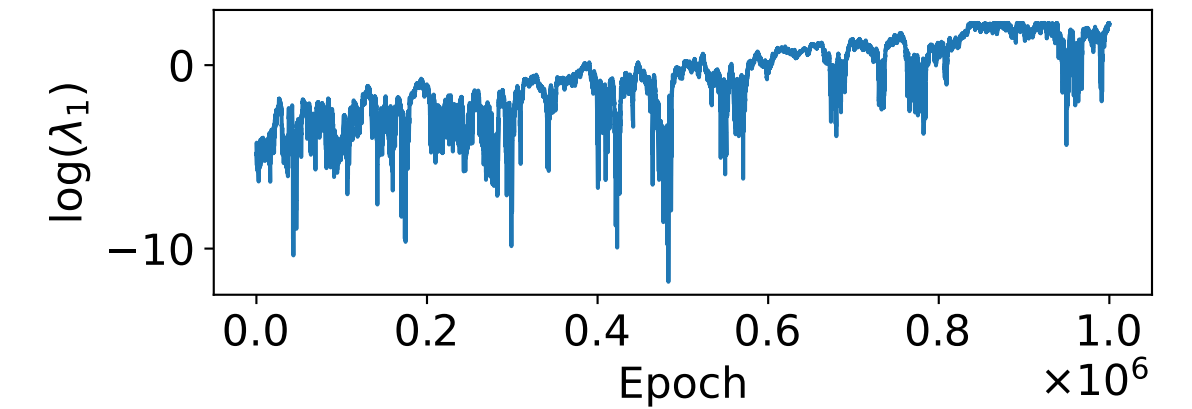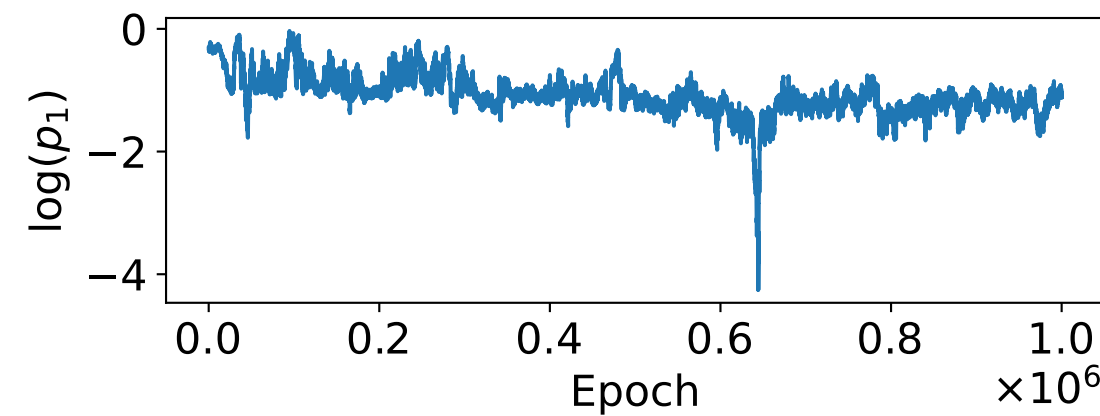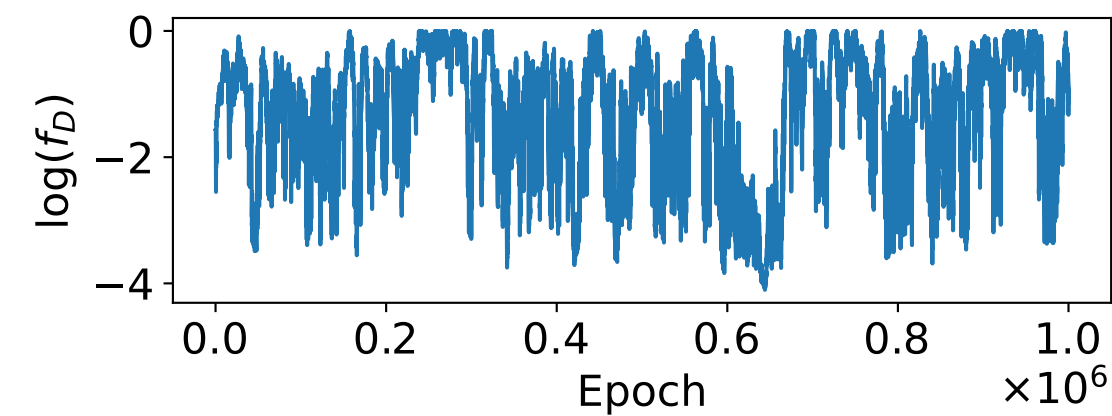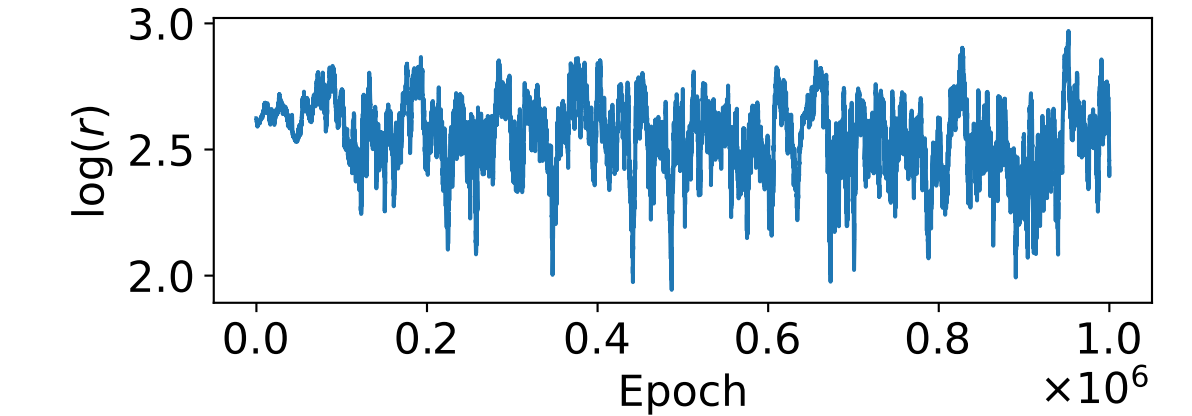

# Vermont

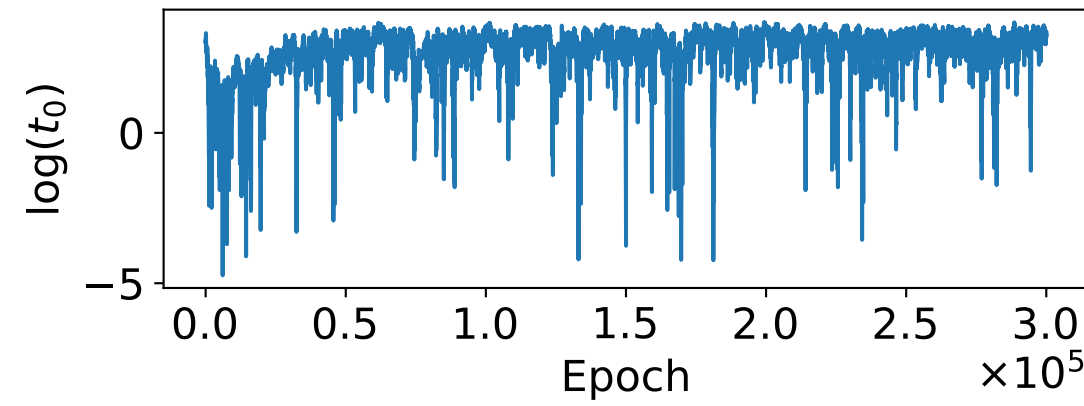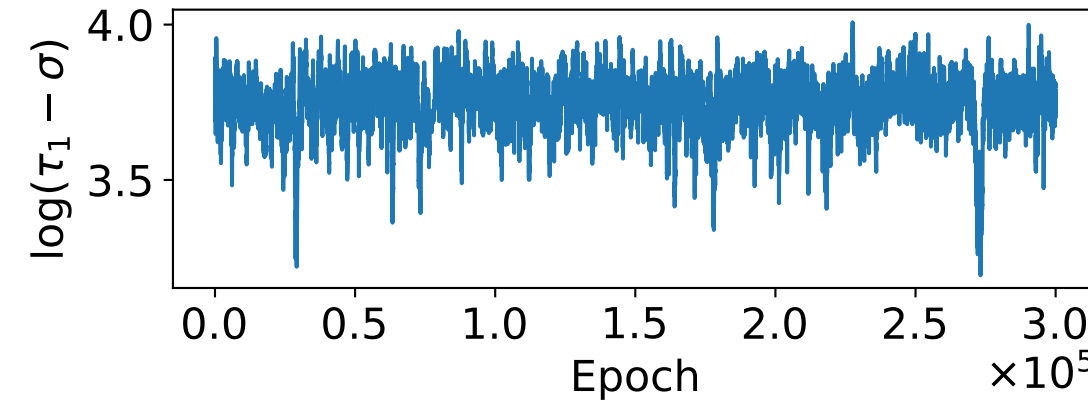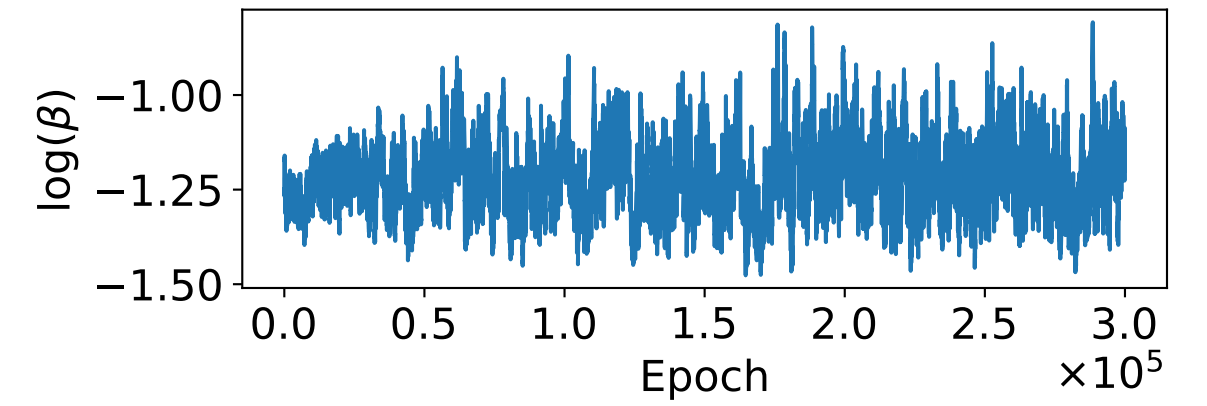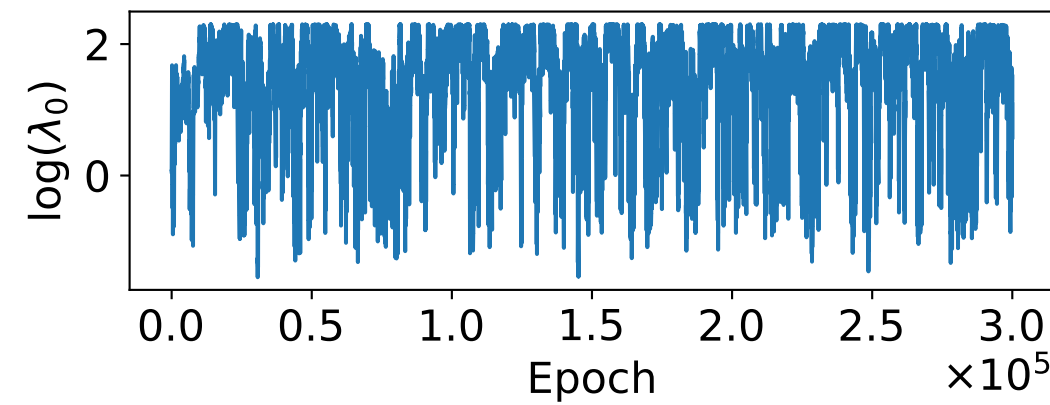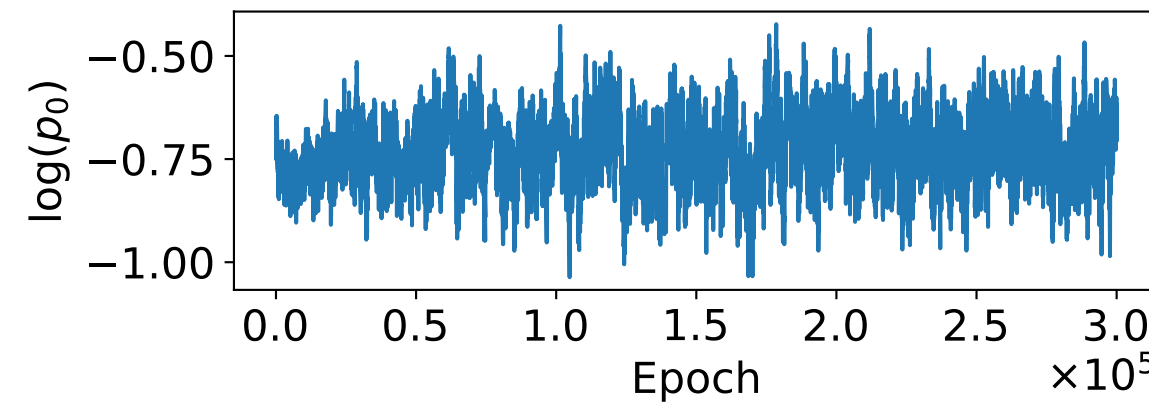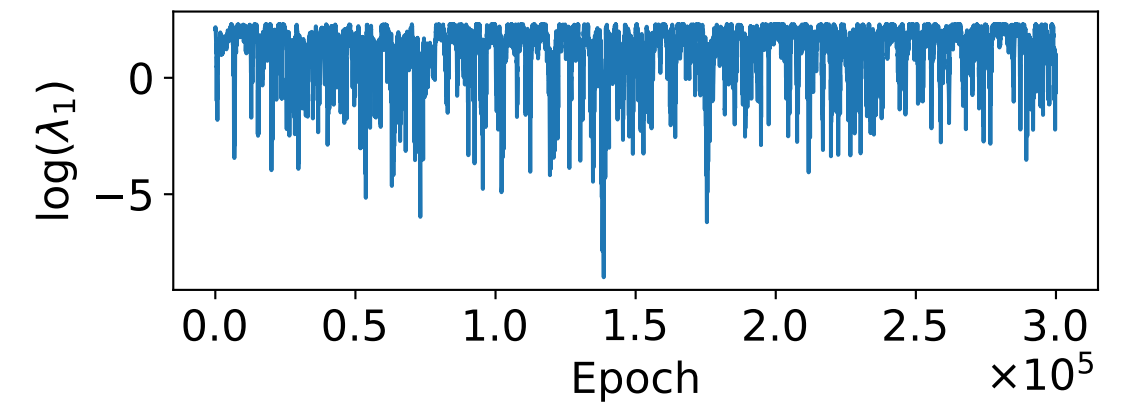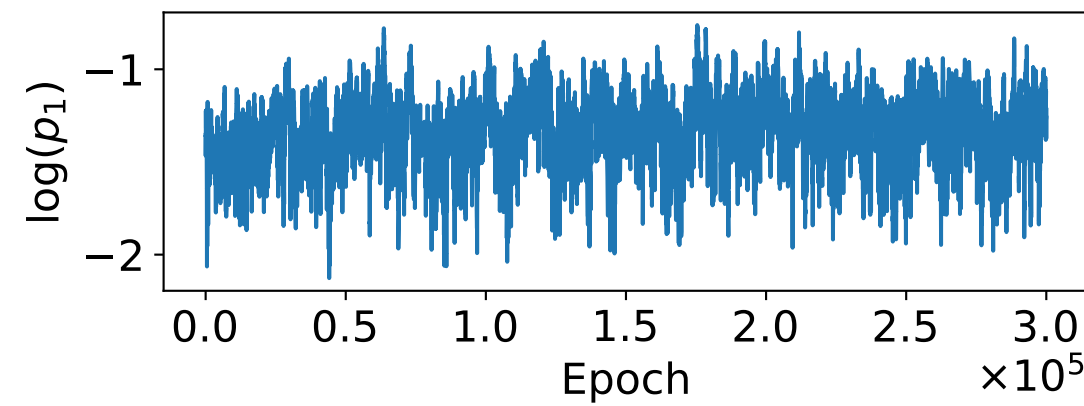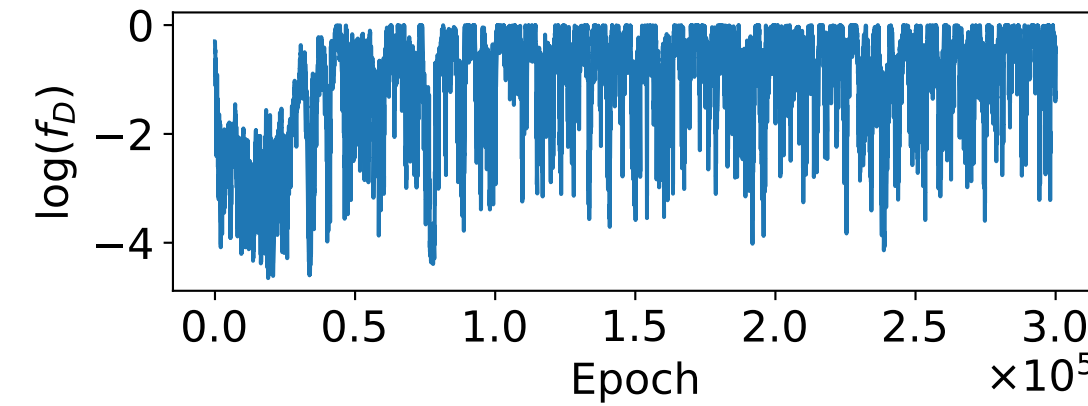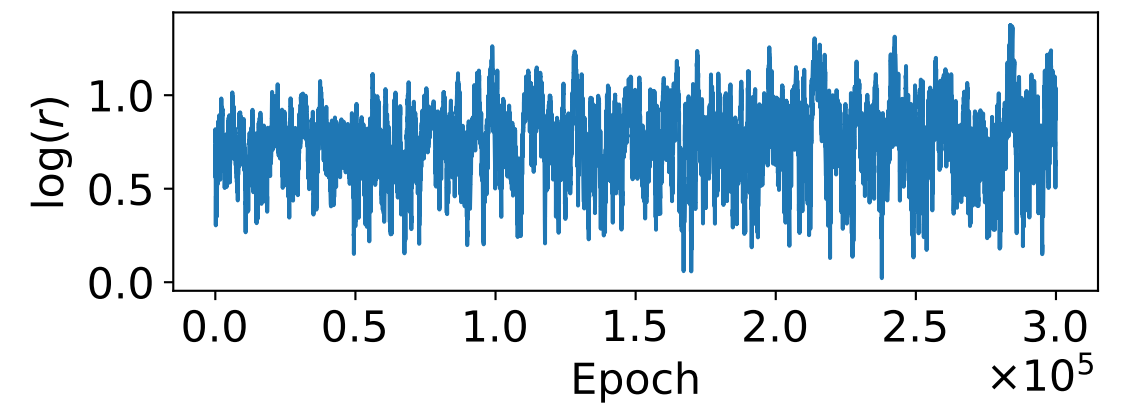



# Virginia

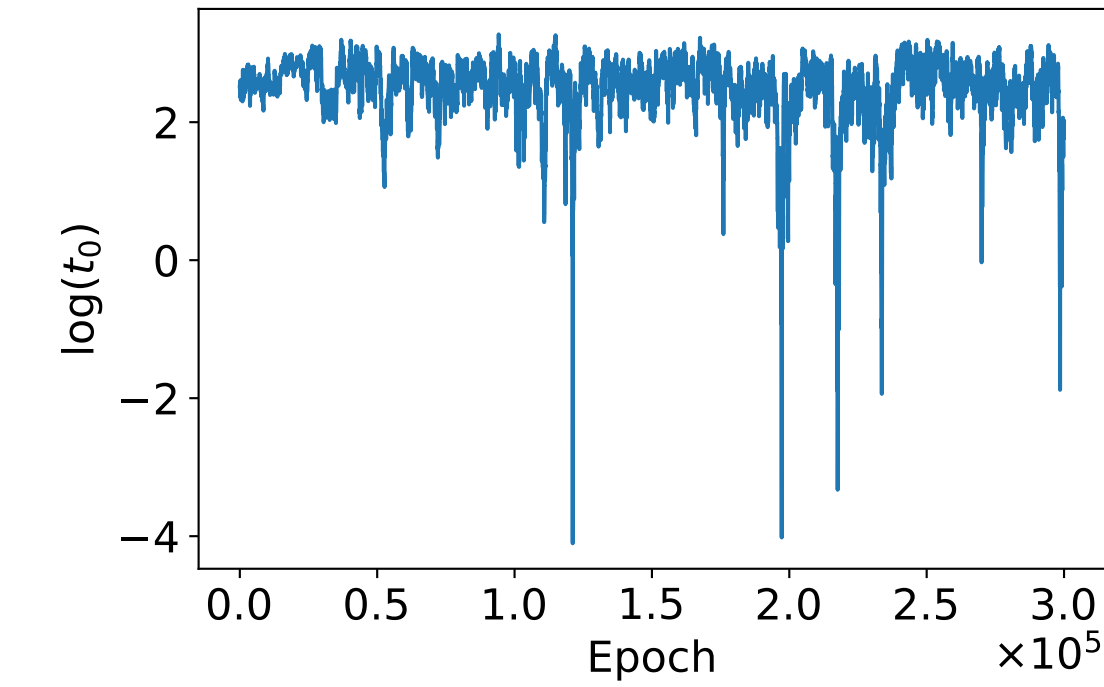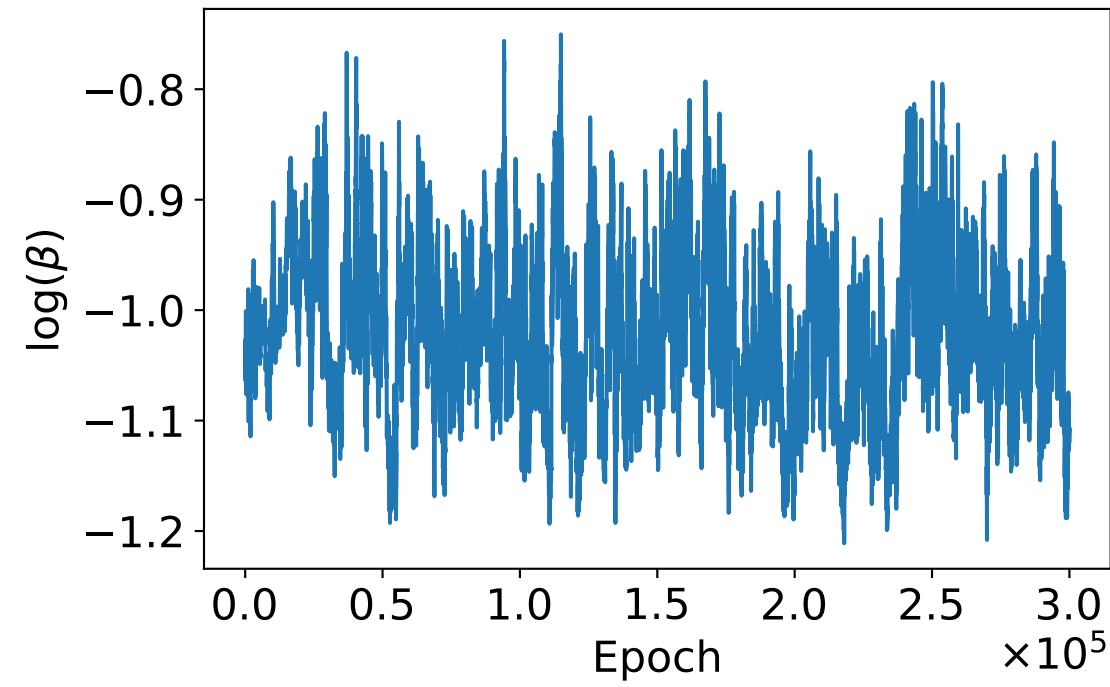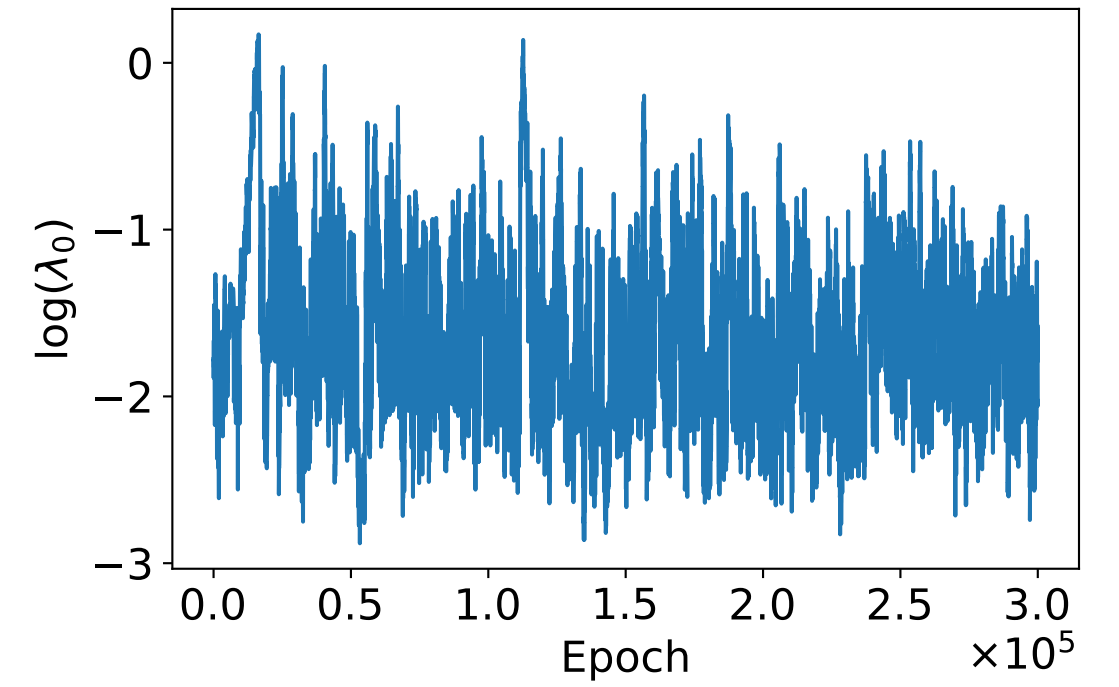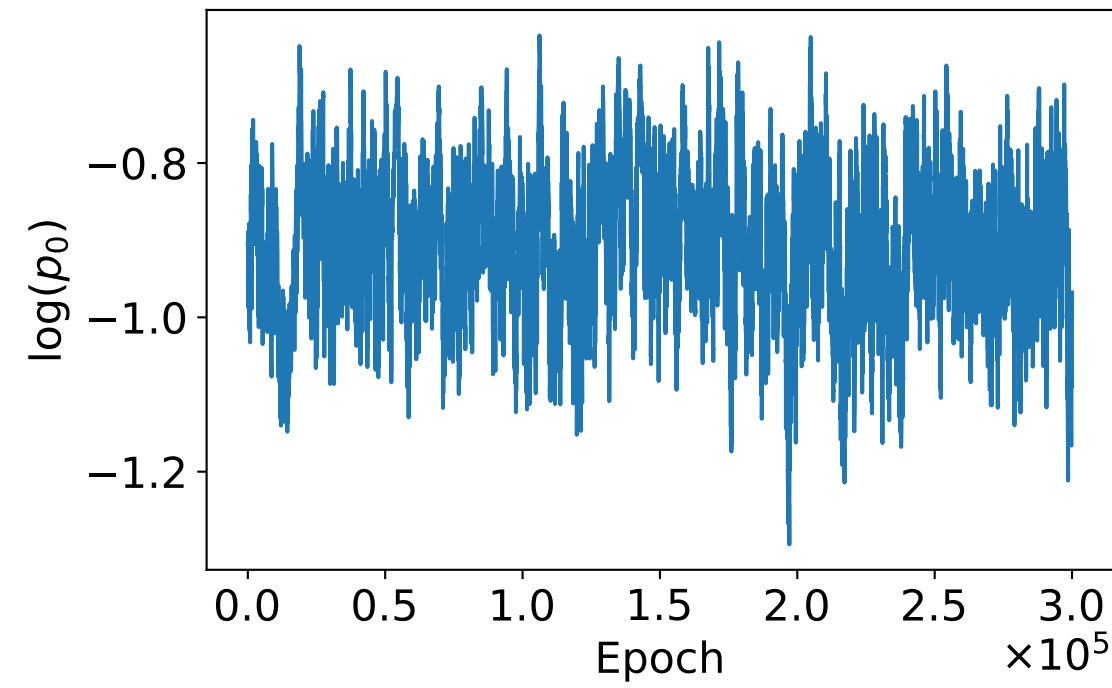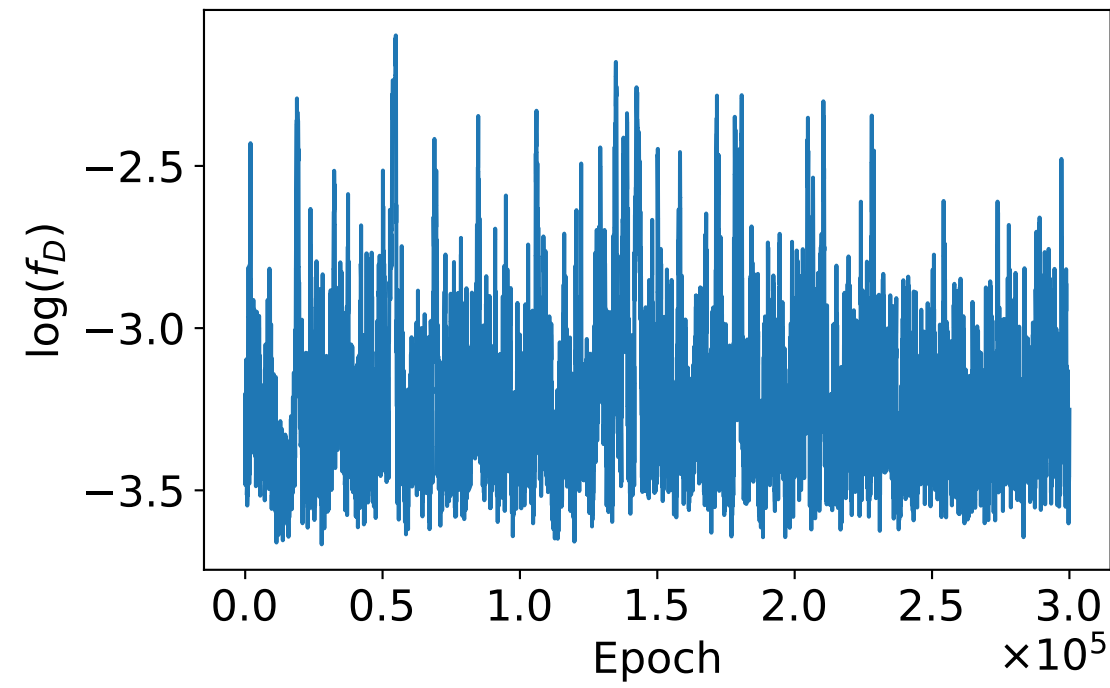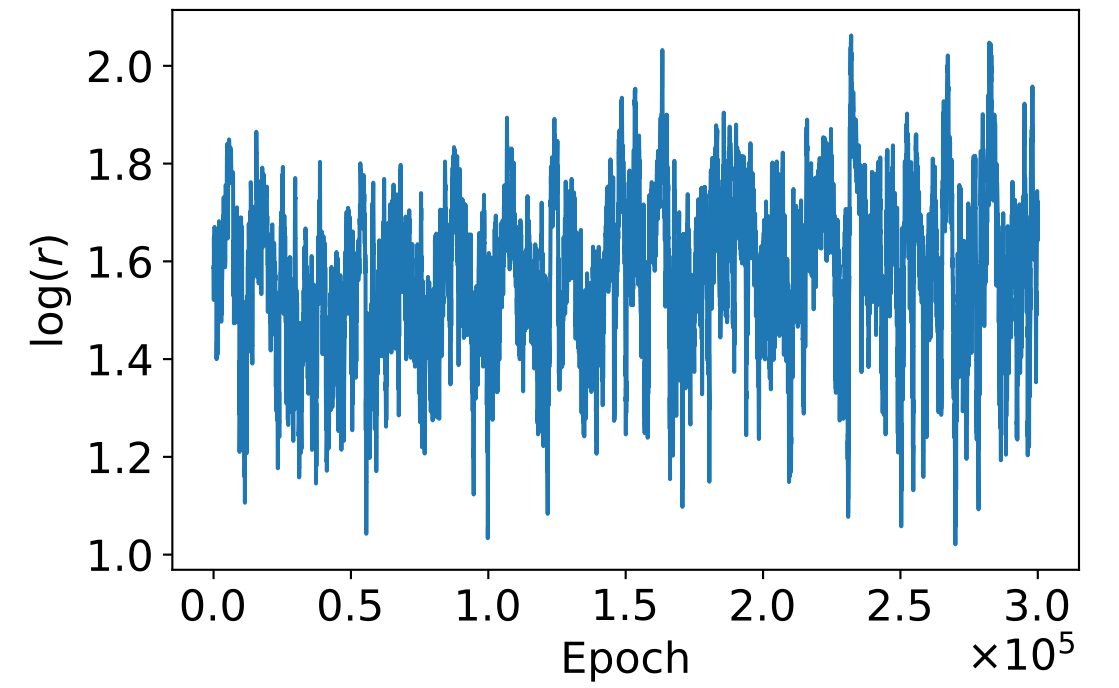

Washington

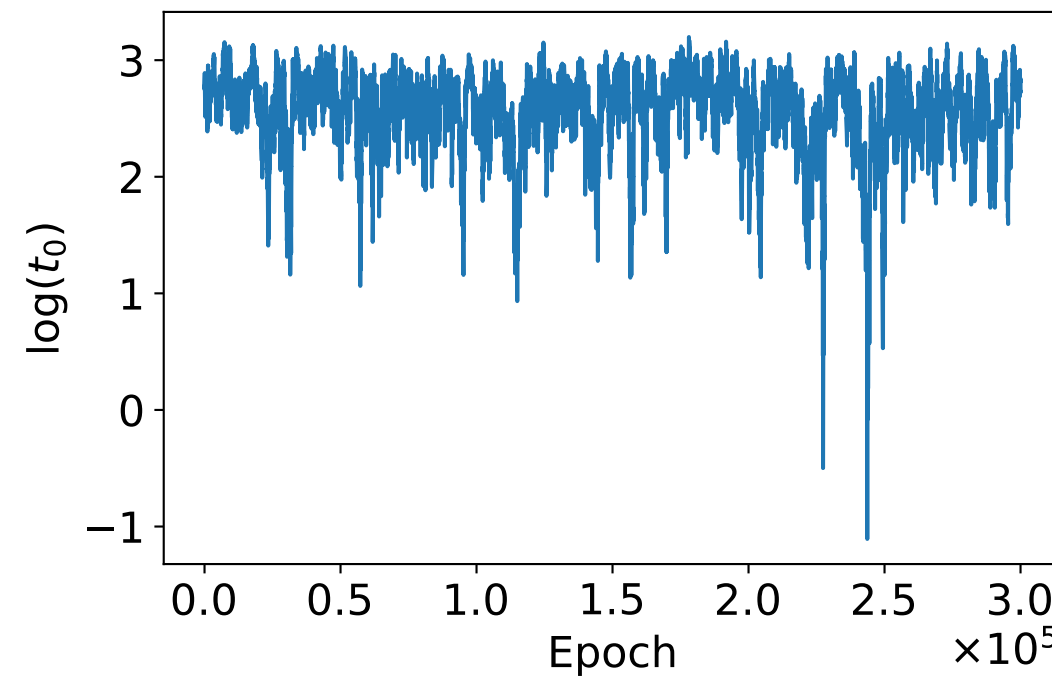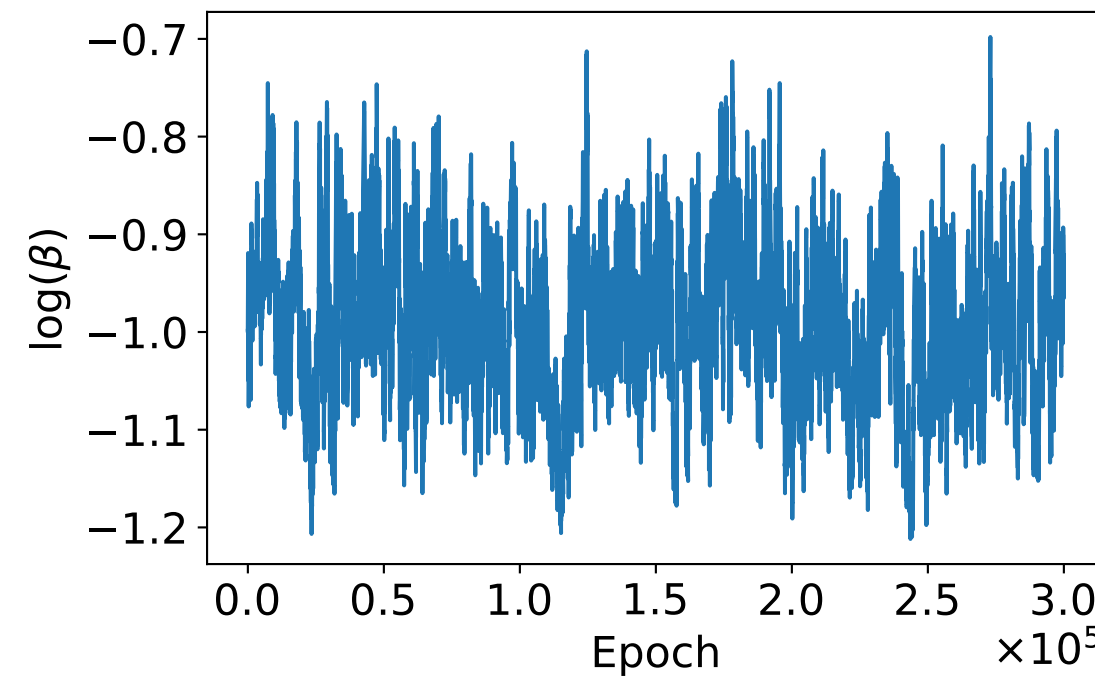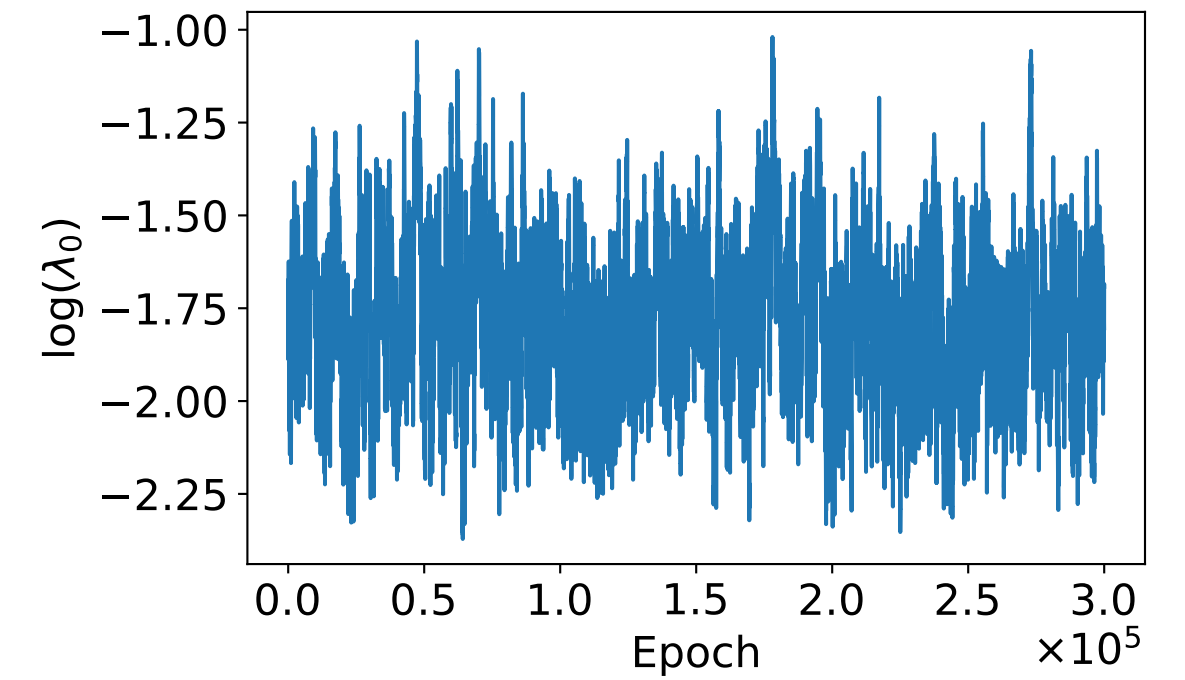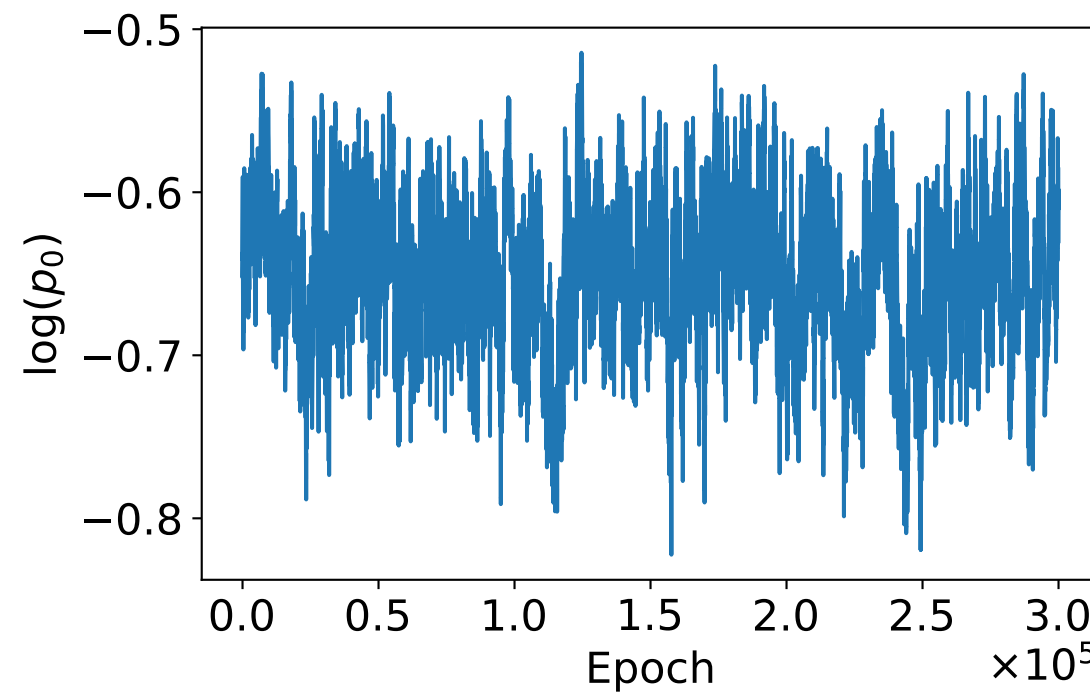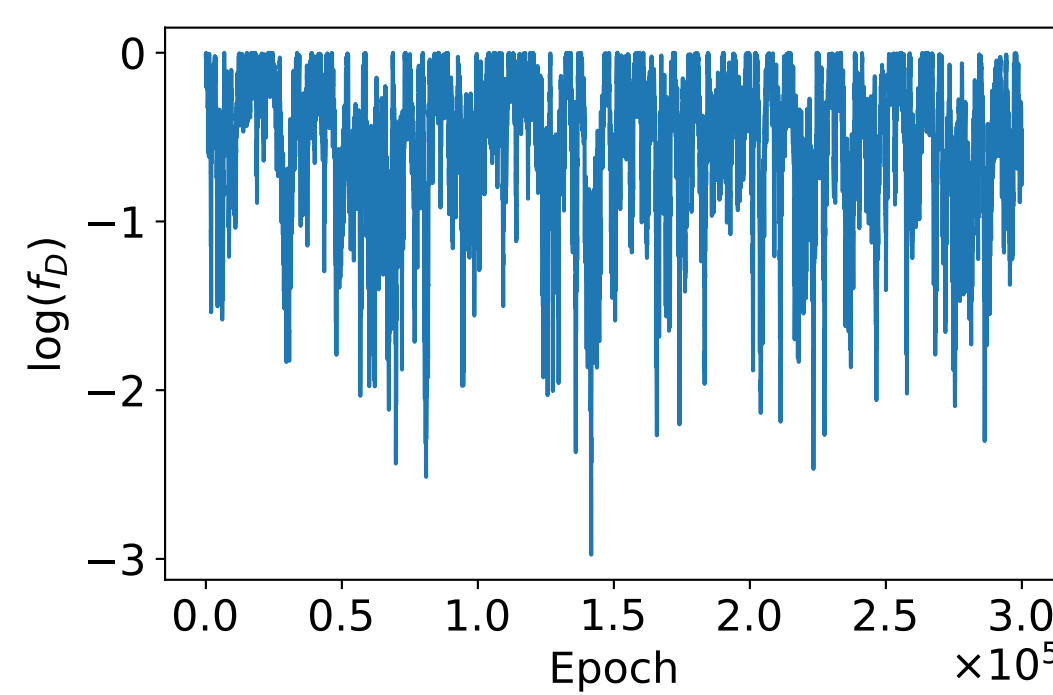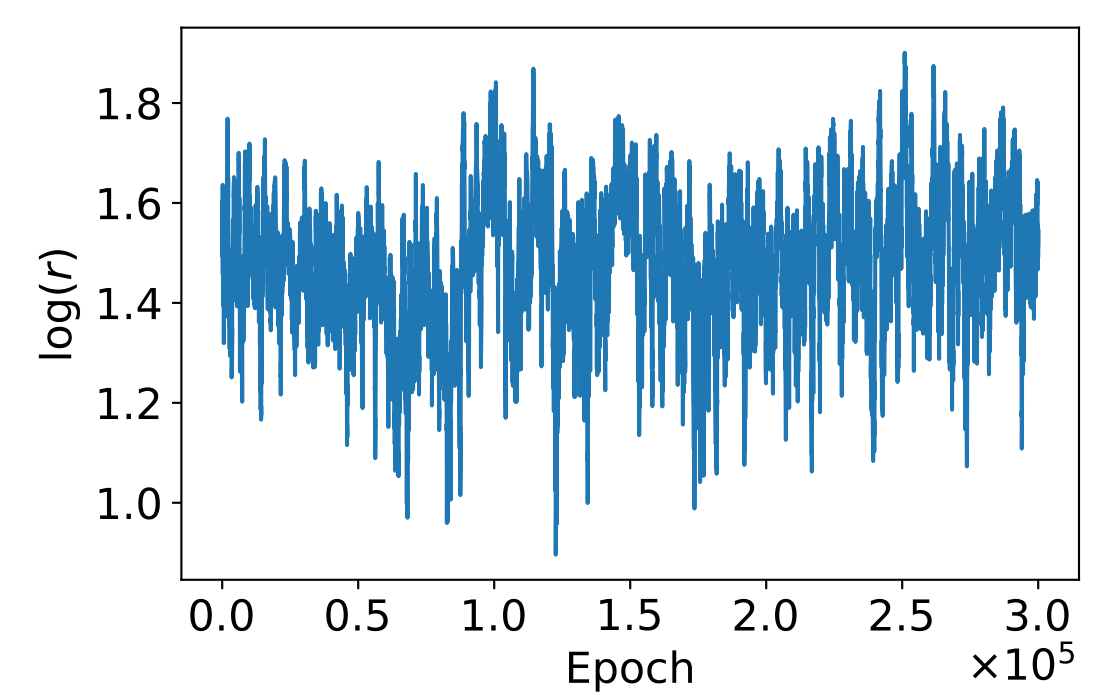

# West Virginia

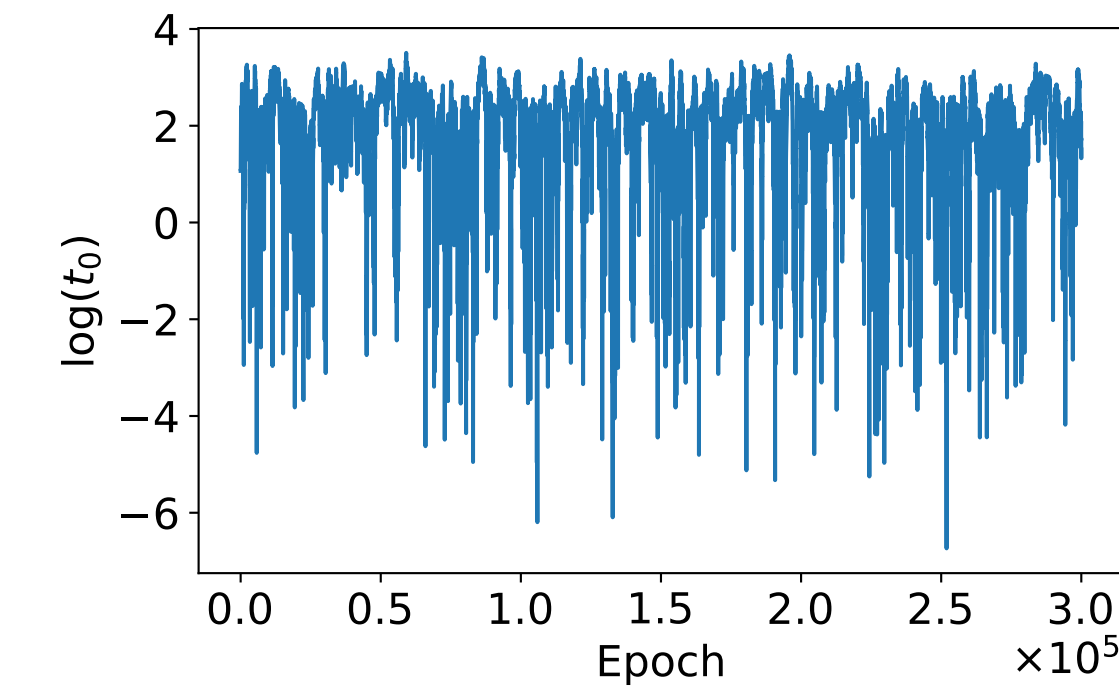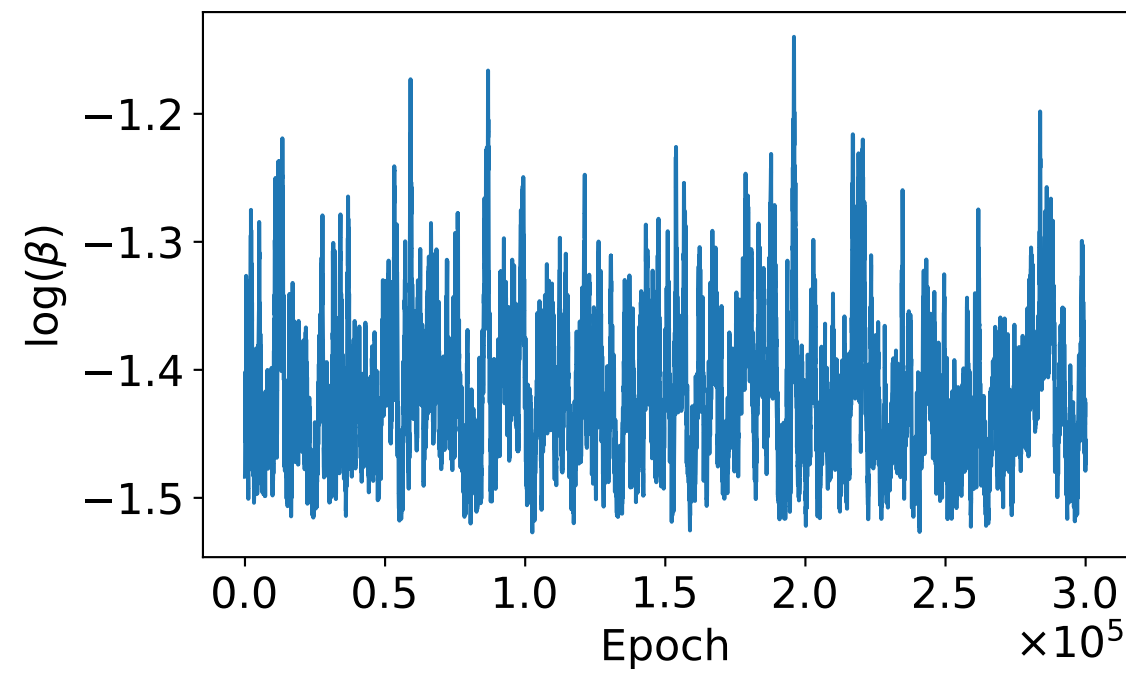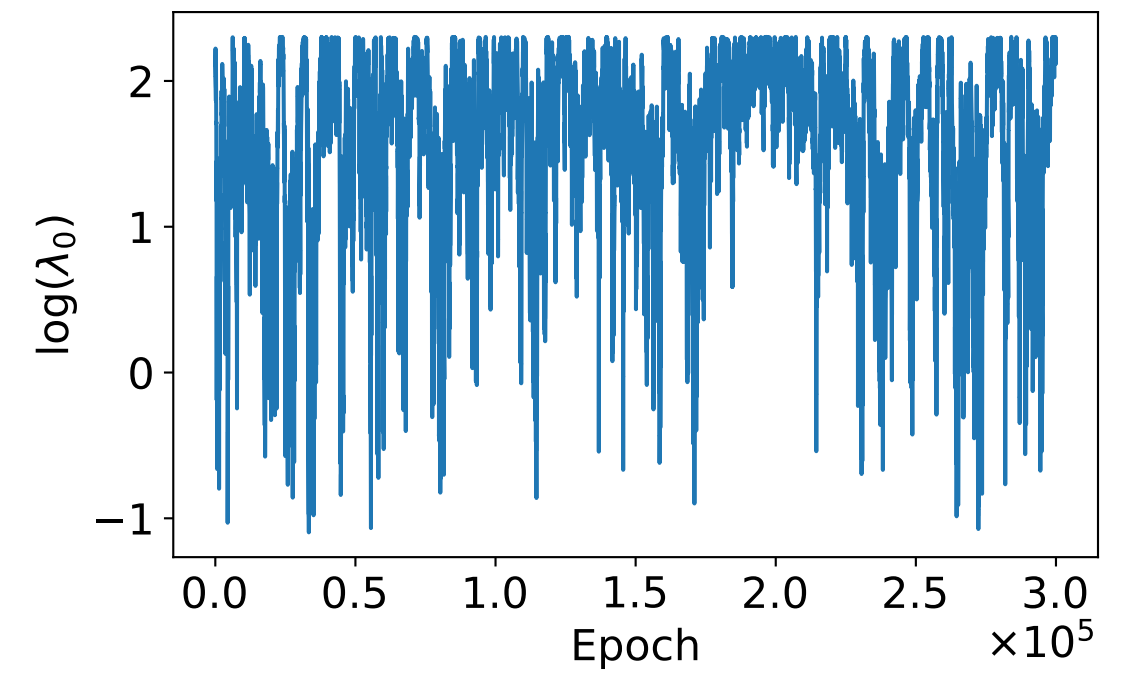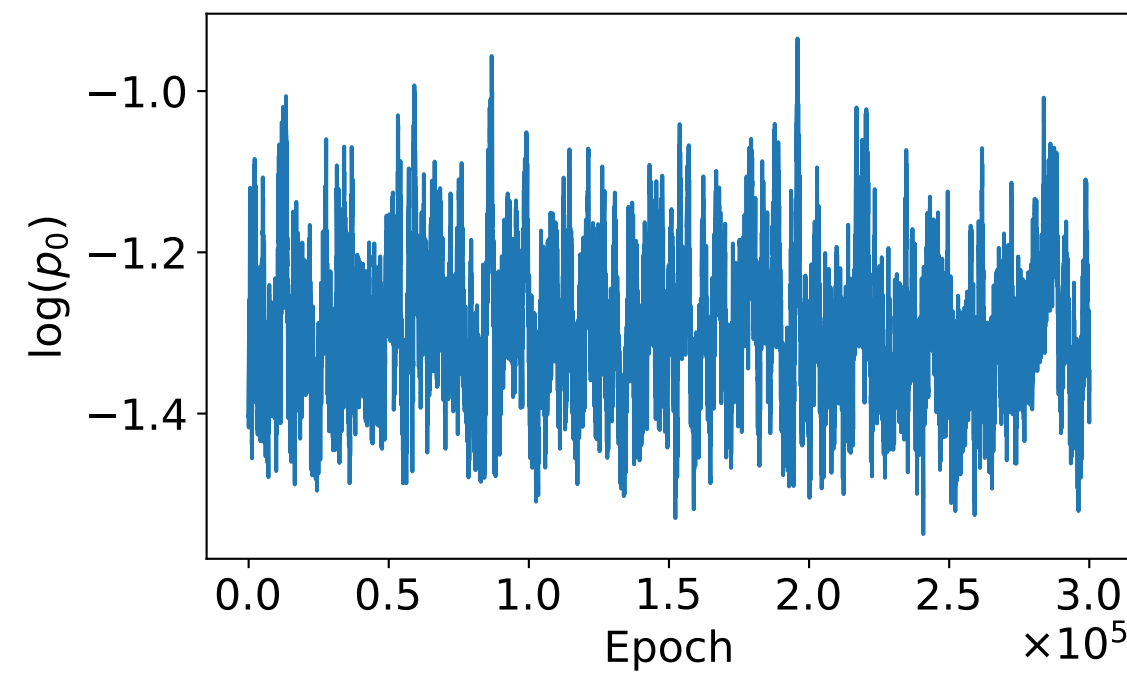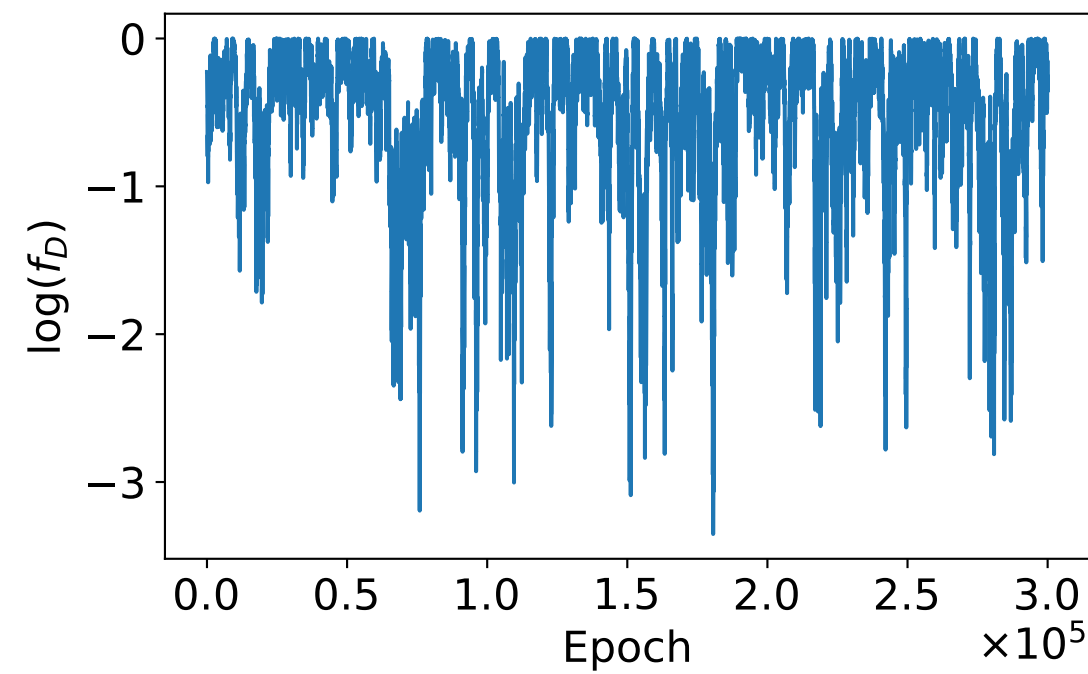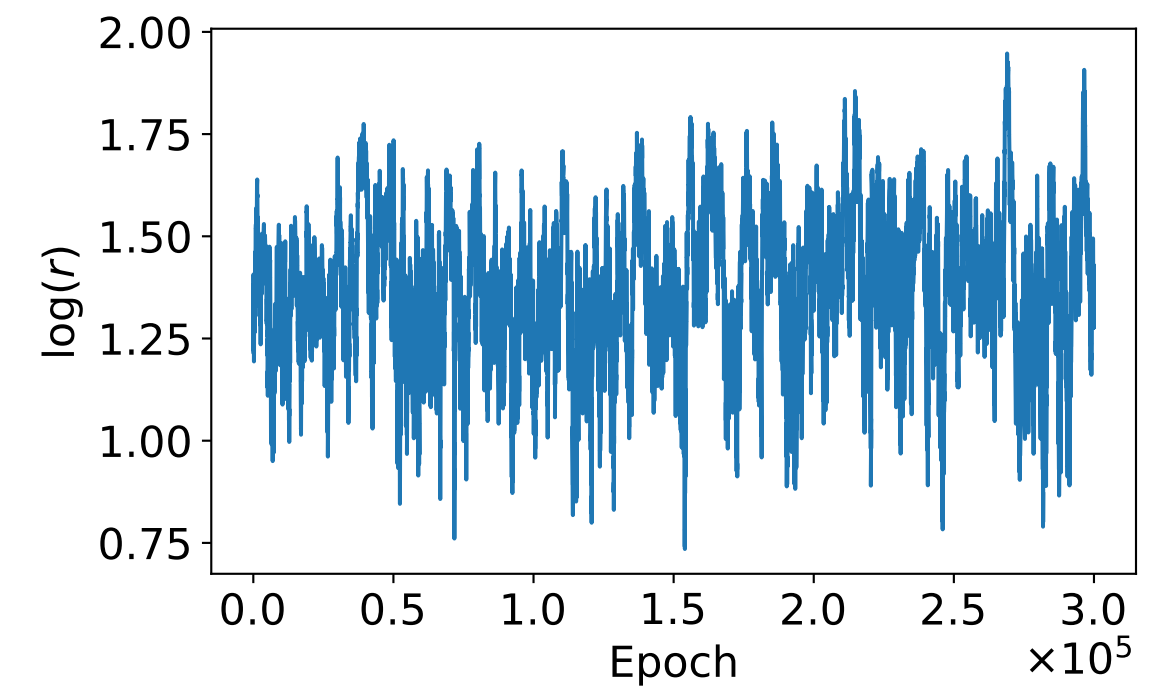

# Wisconsin

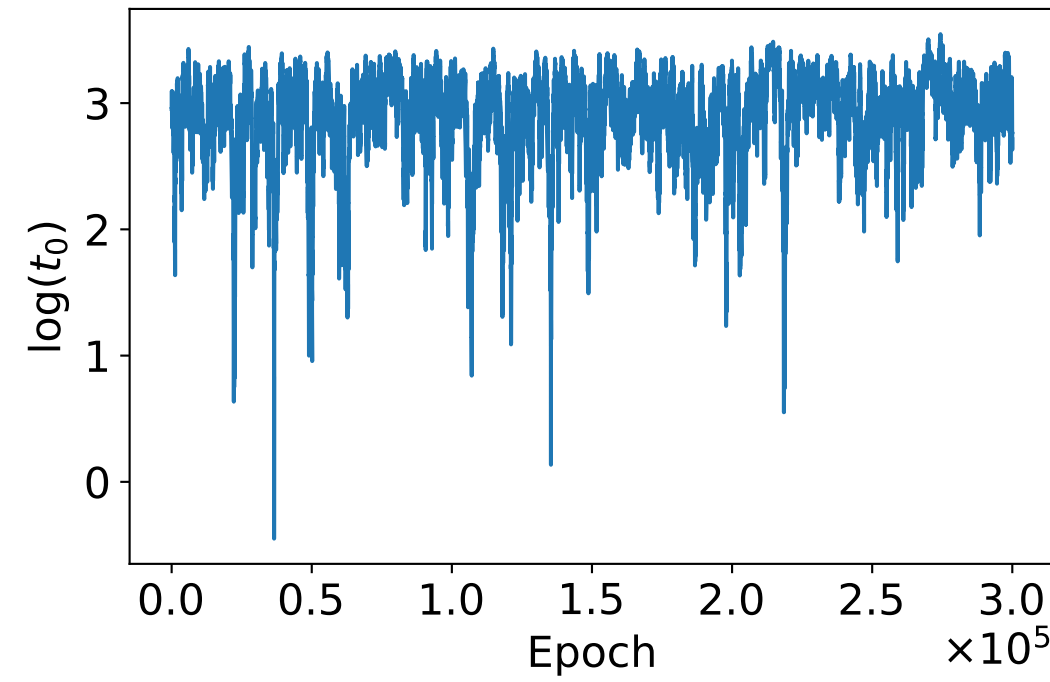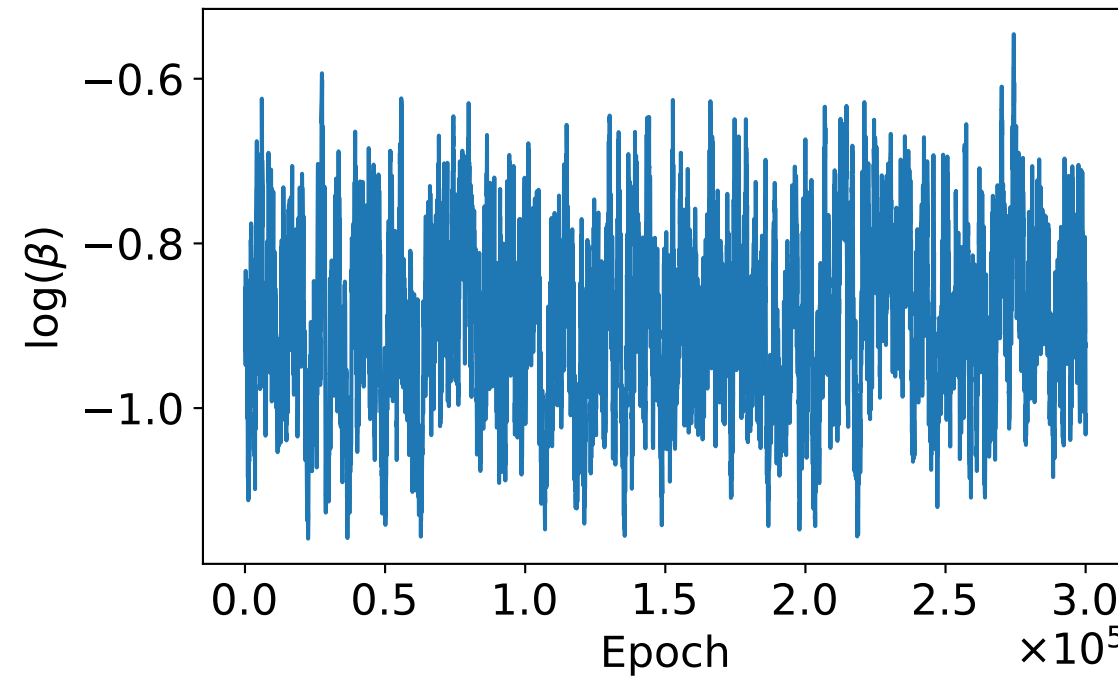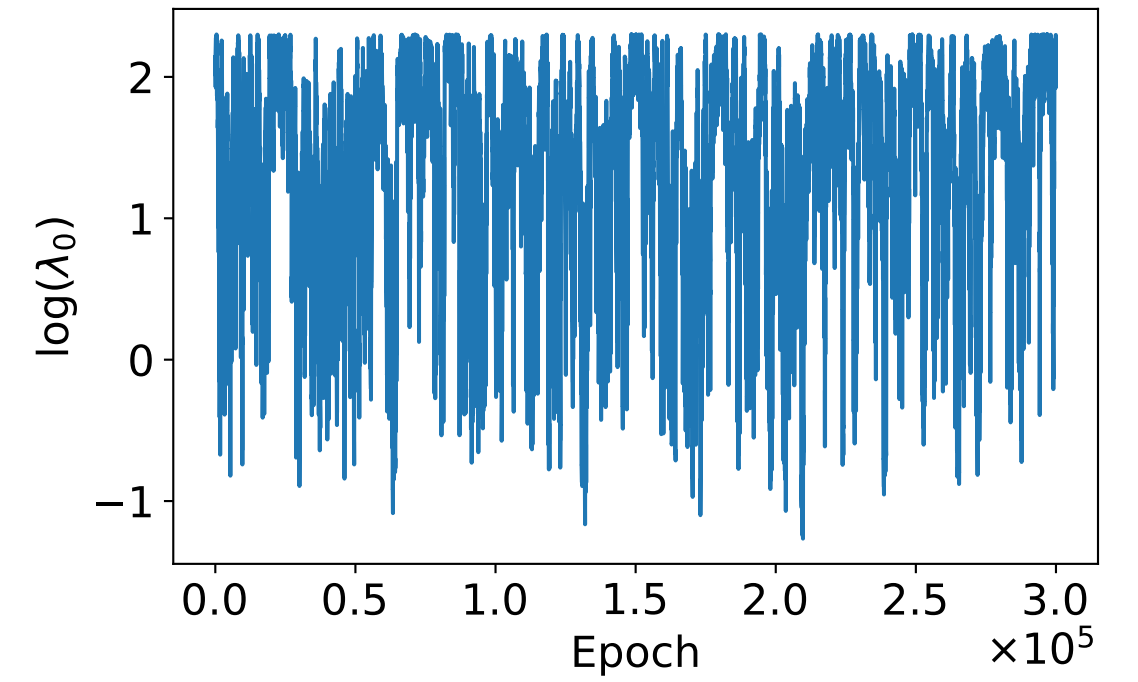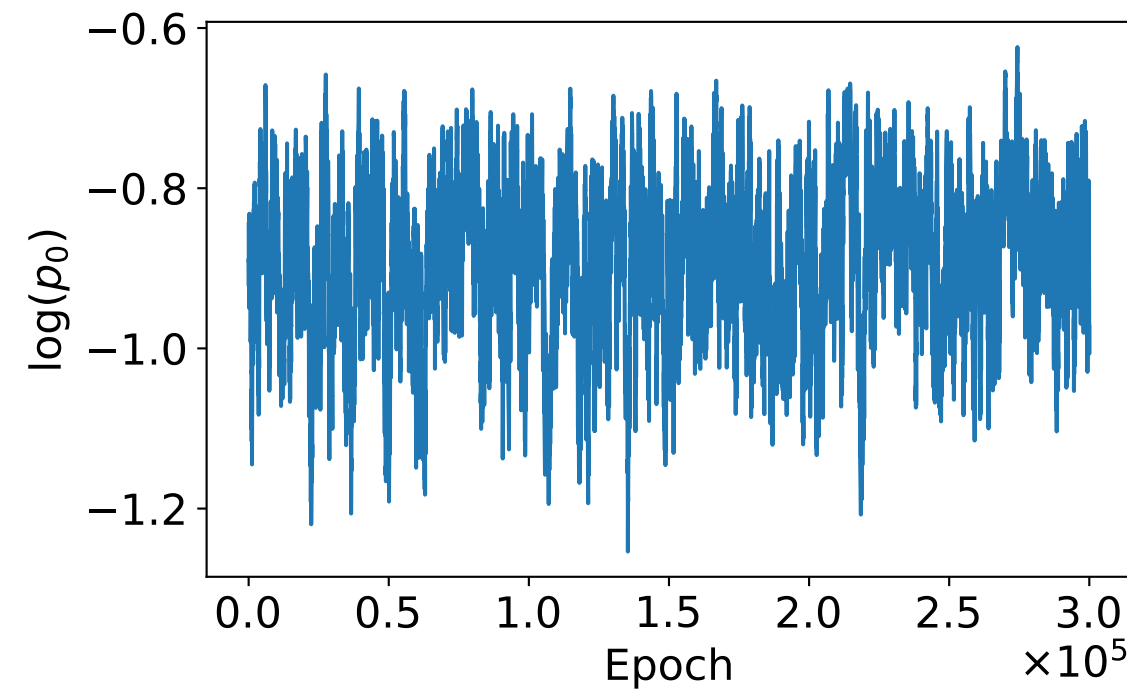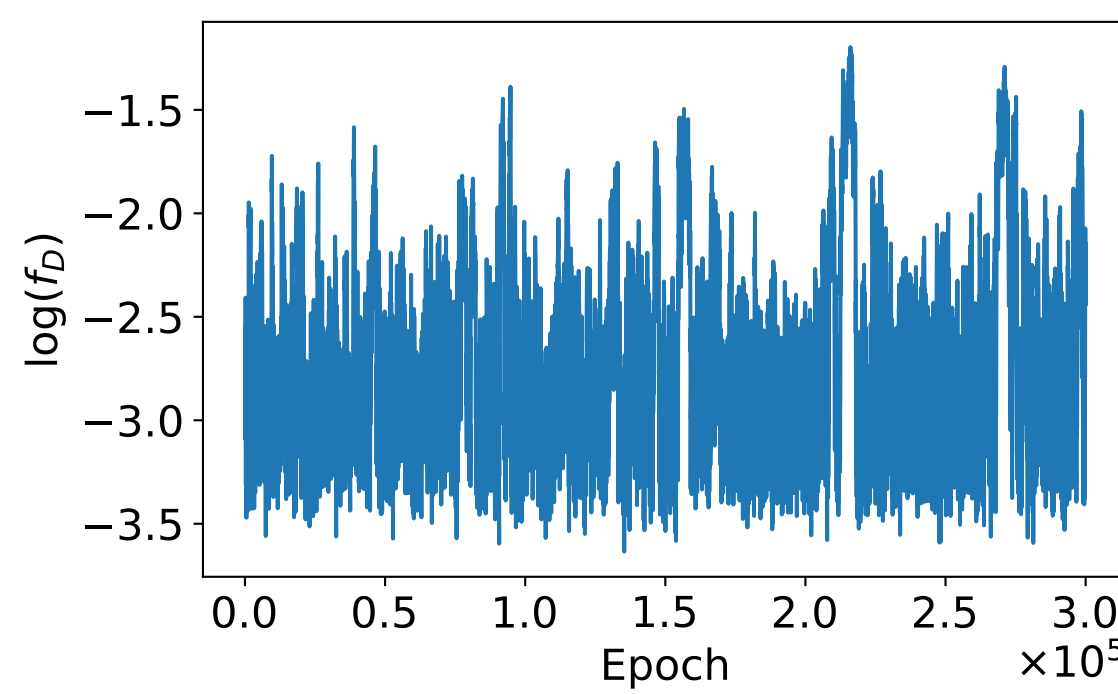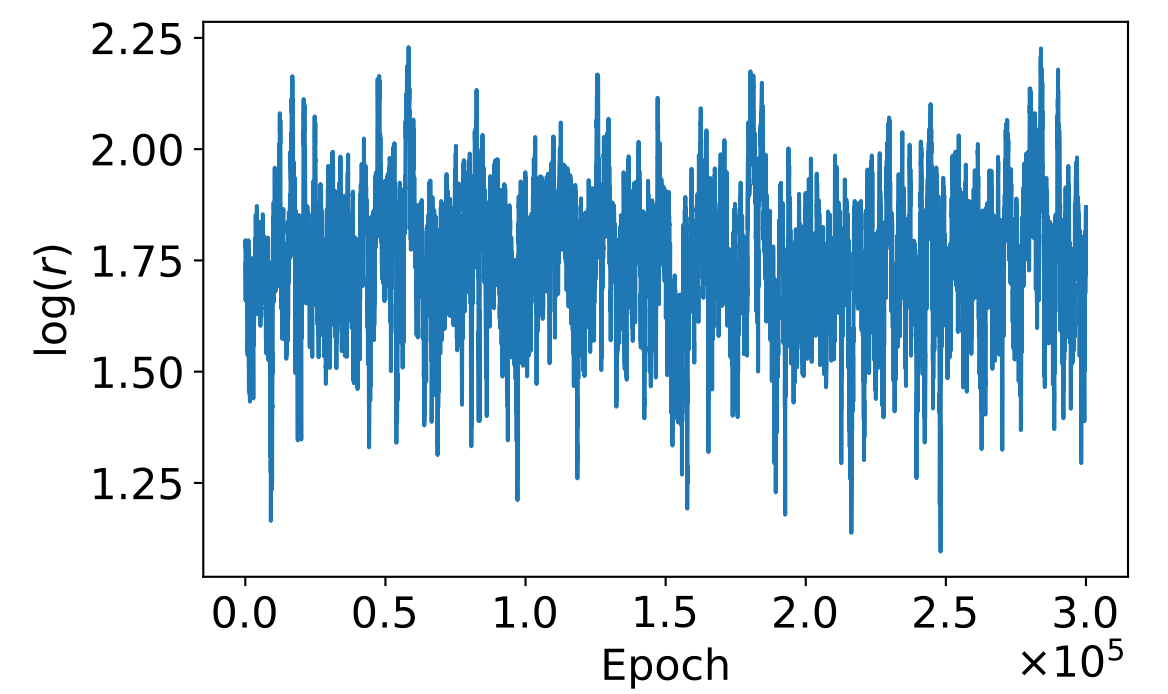

# Wyoming

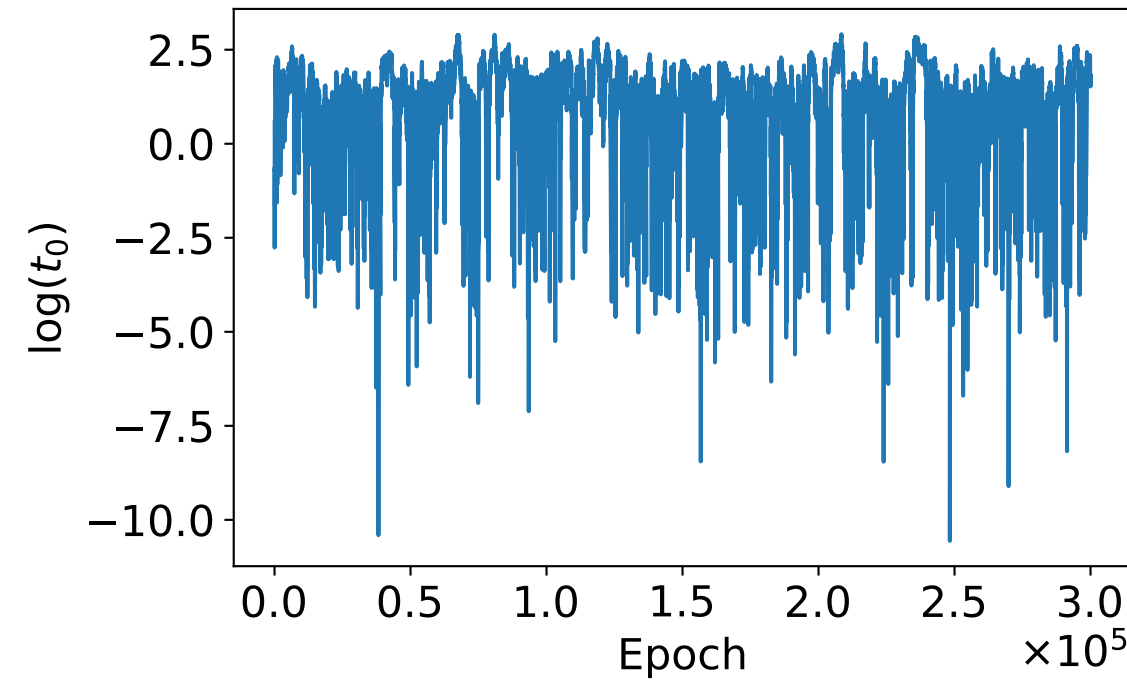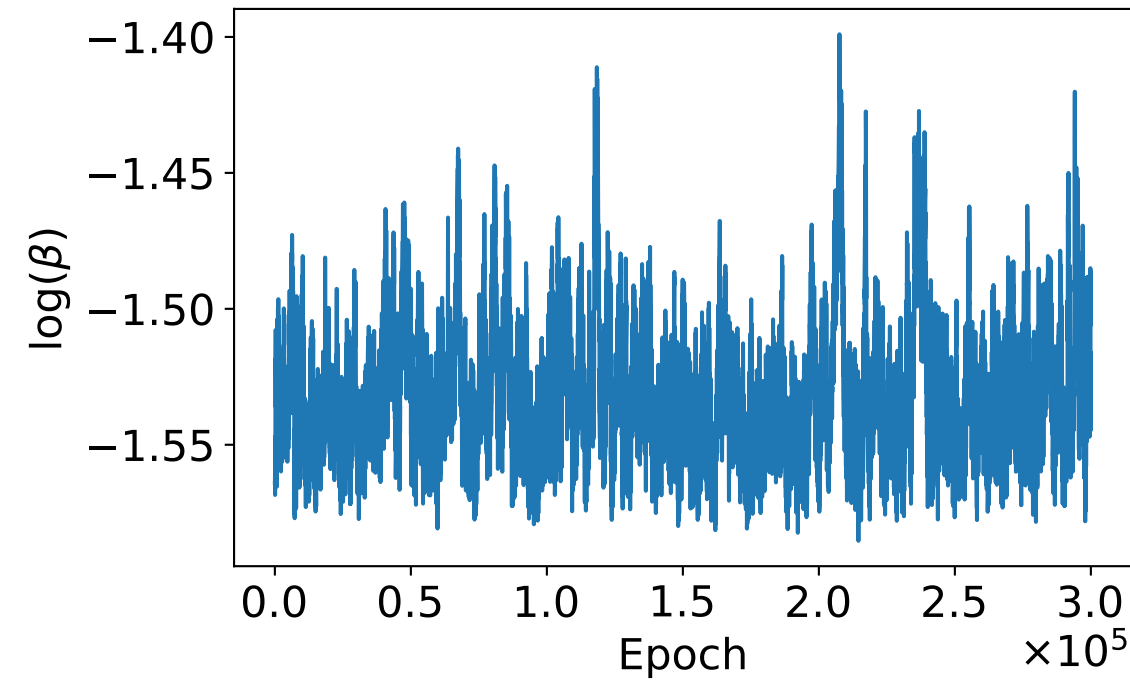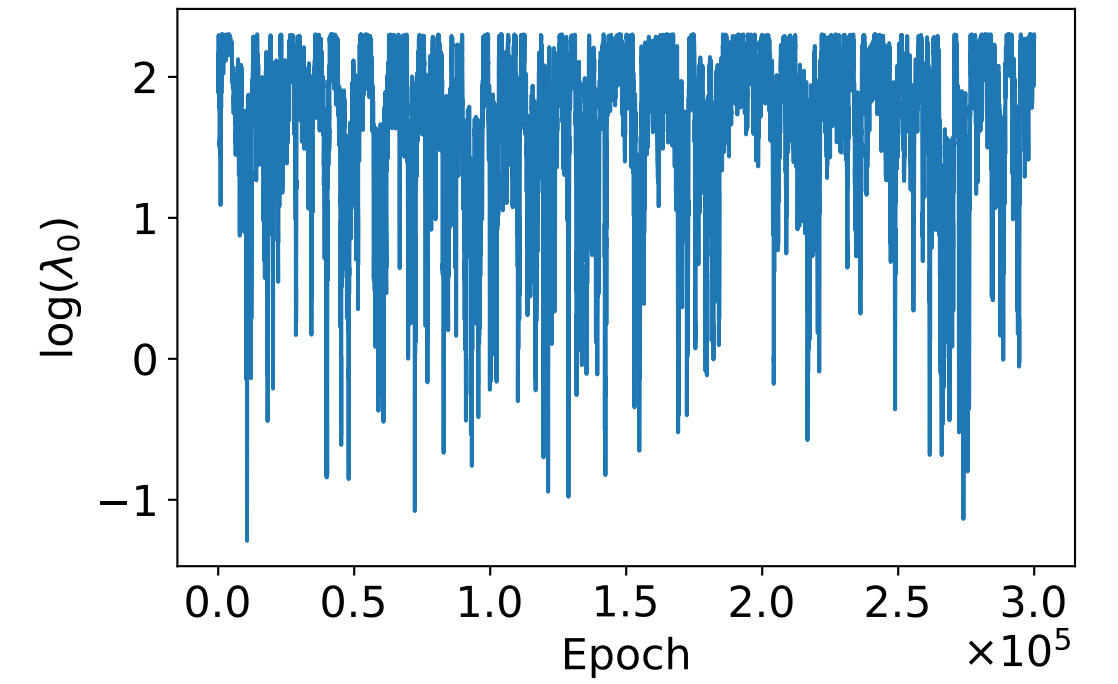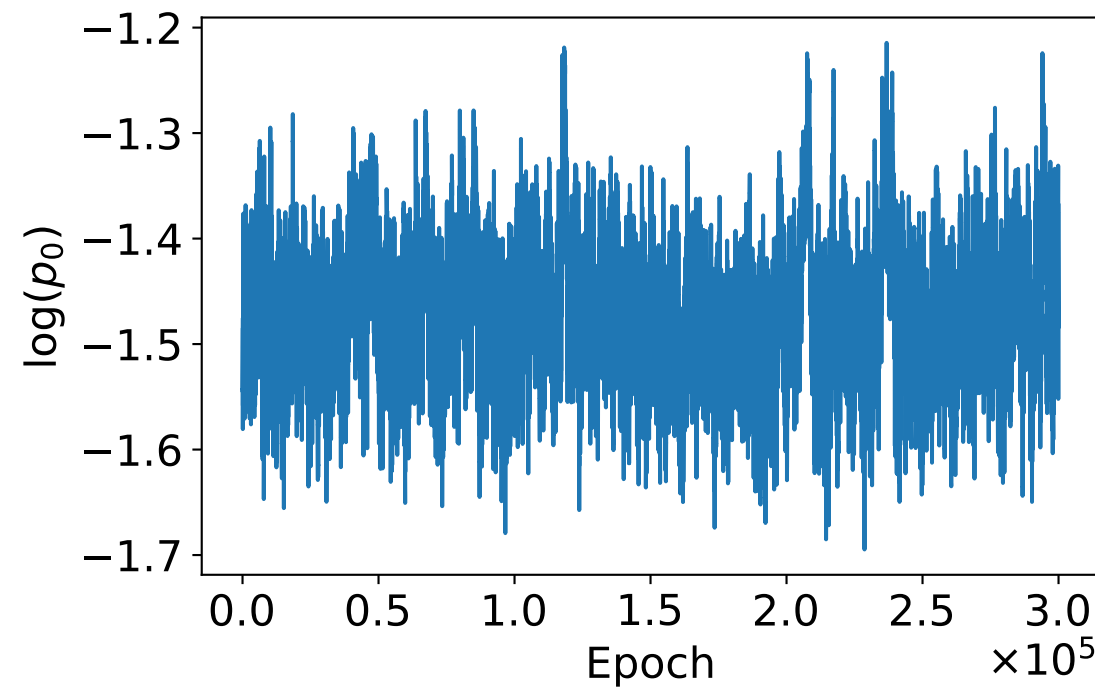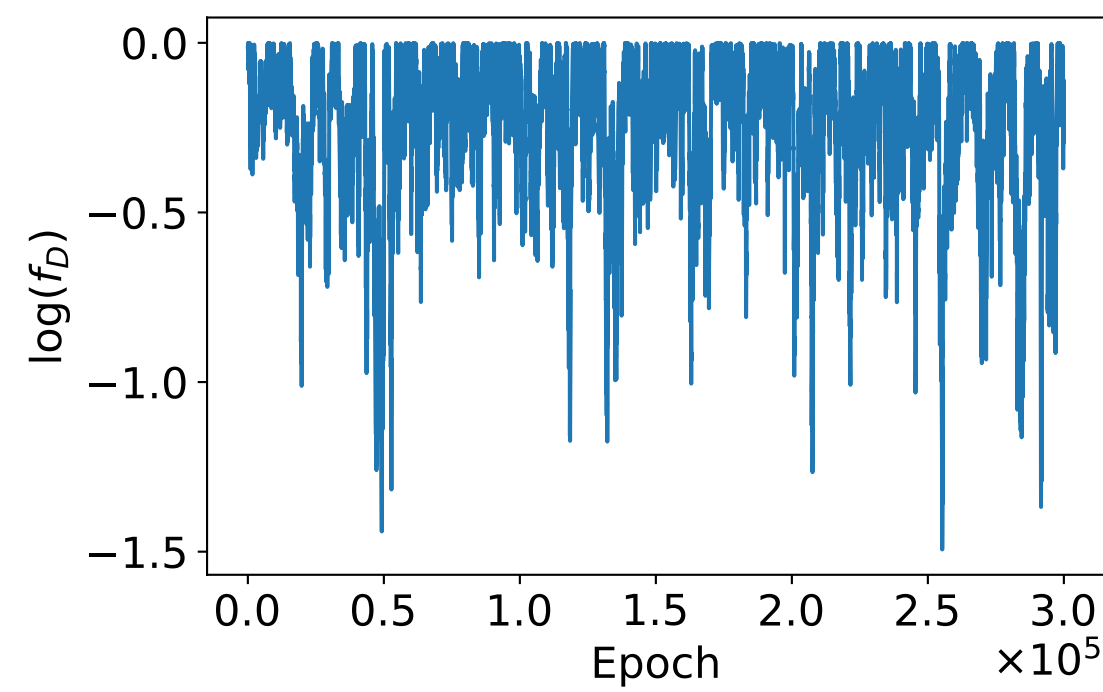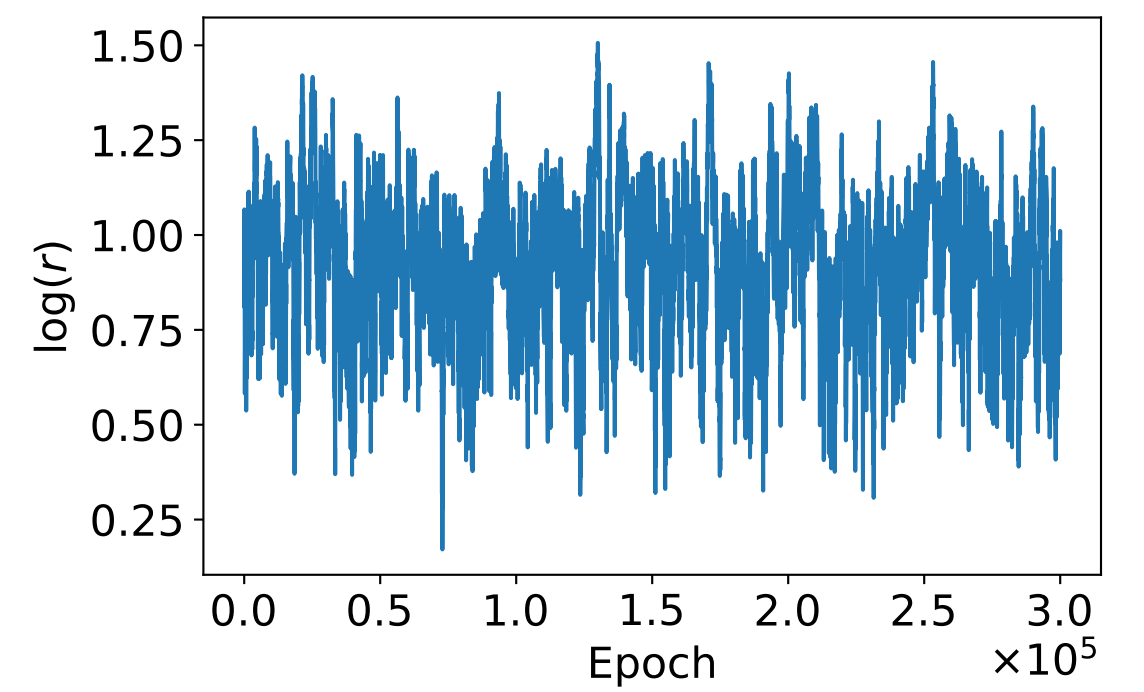

**Figure S4.** Matrix of 1- and 2-dimensional marginalizations of the posterior samples obtained for the adjustable parameters associated with the compartmental model for each of the 50 US states. Inferences are based on daily reports of new cases of COVID-19 from January 21 to June 21, 2020. Plots of marginal posteriors (1-dimensional marginalizations) are shown on the diagonal from top left to bottom right. Other plots are 2-dimensional marginalizations (presented as histograms) indicating the correlations between parameter estimates. Brightness indicates higher probability density. A compact bright area indicates low correlation. An extended, asymmetric bright area indicates high correlation. The pairs plots shown here are matched to the trace plots of Figs S3 and S4. See the caption of Fig S2 for additional details.

## Alabama

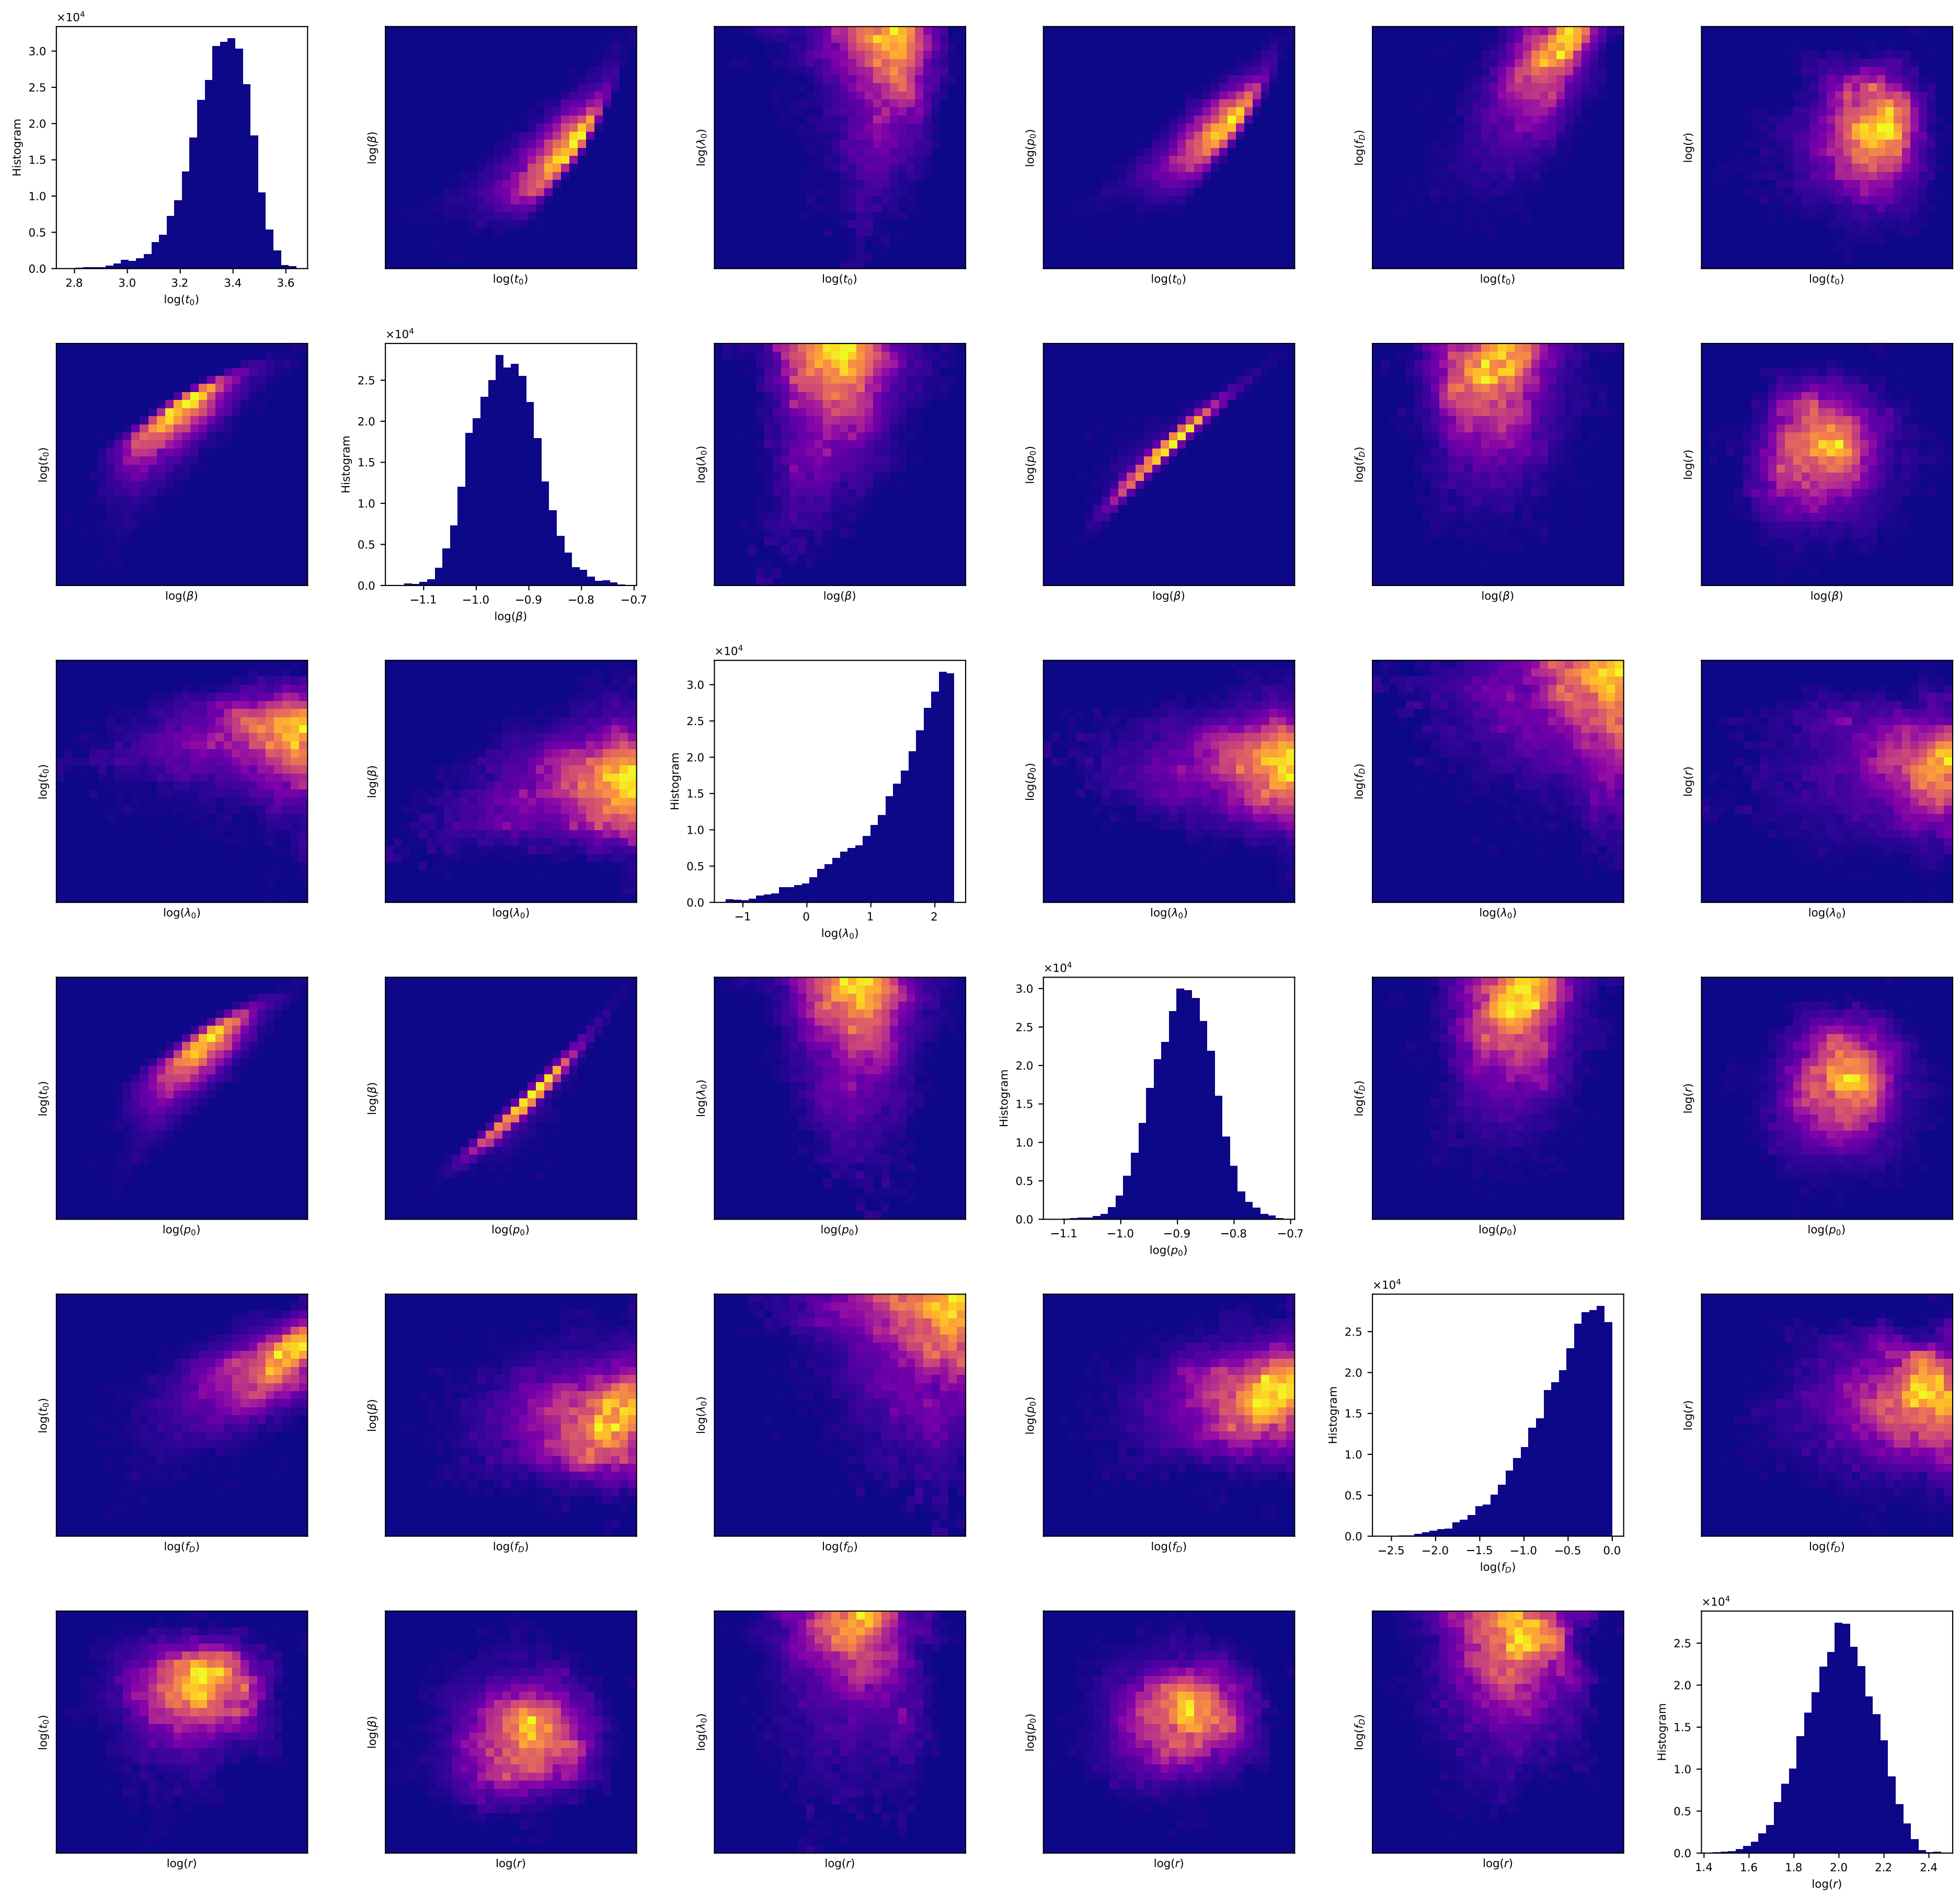

# Alaska

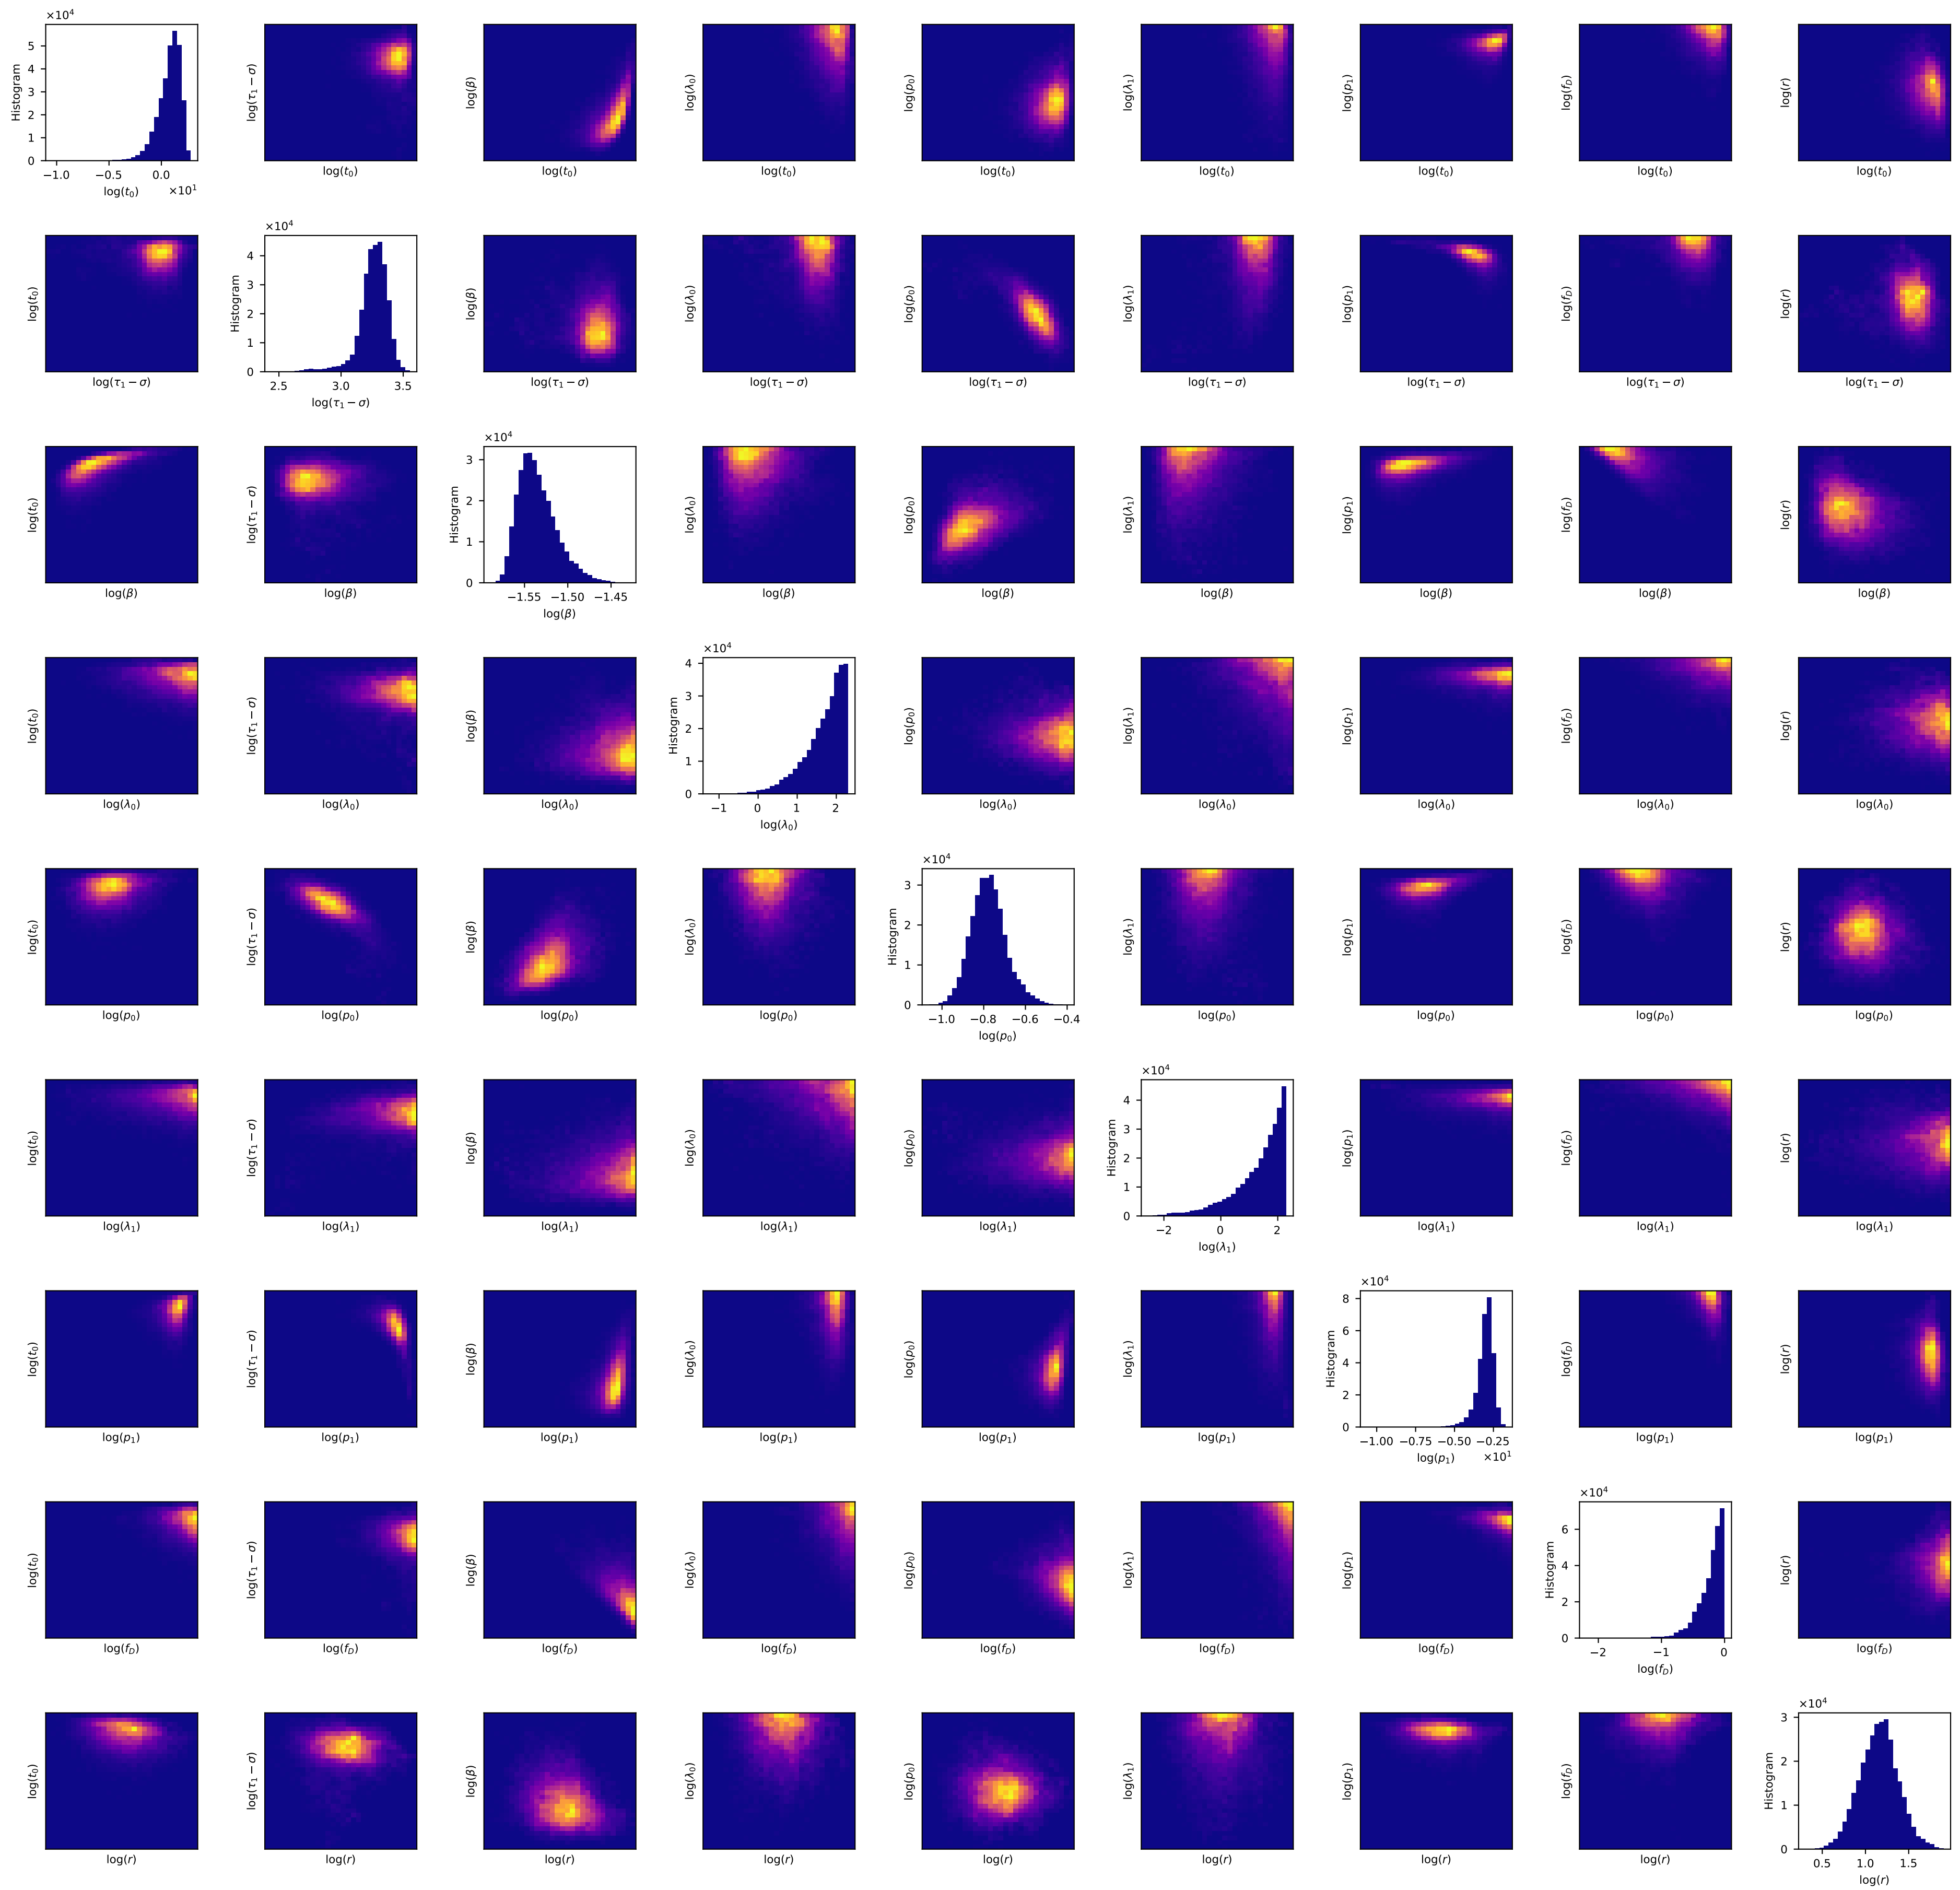



# Arizona

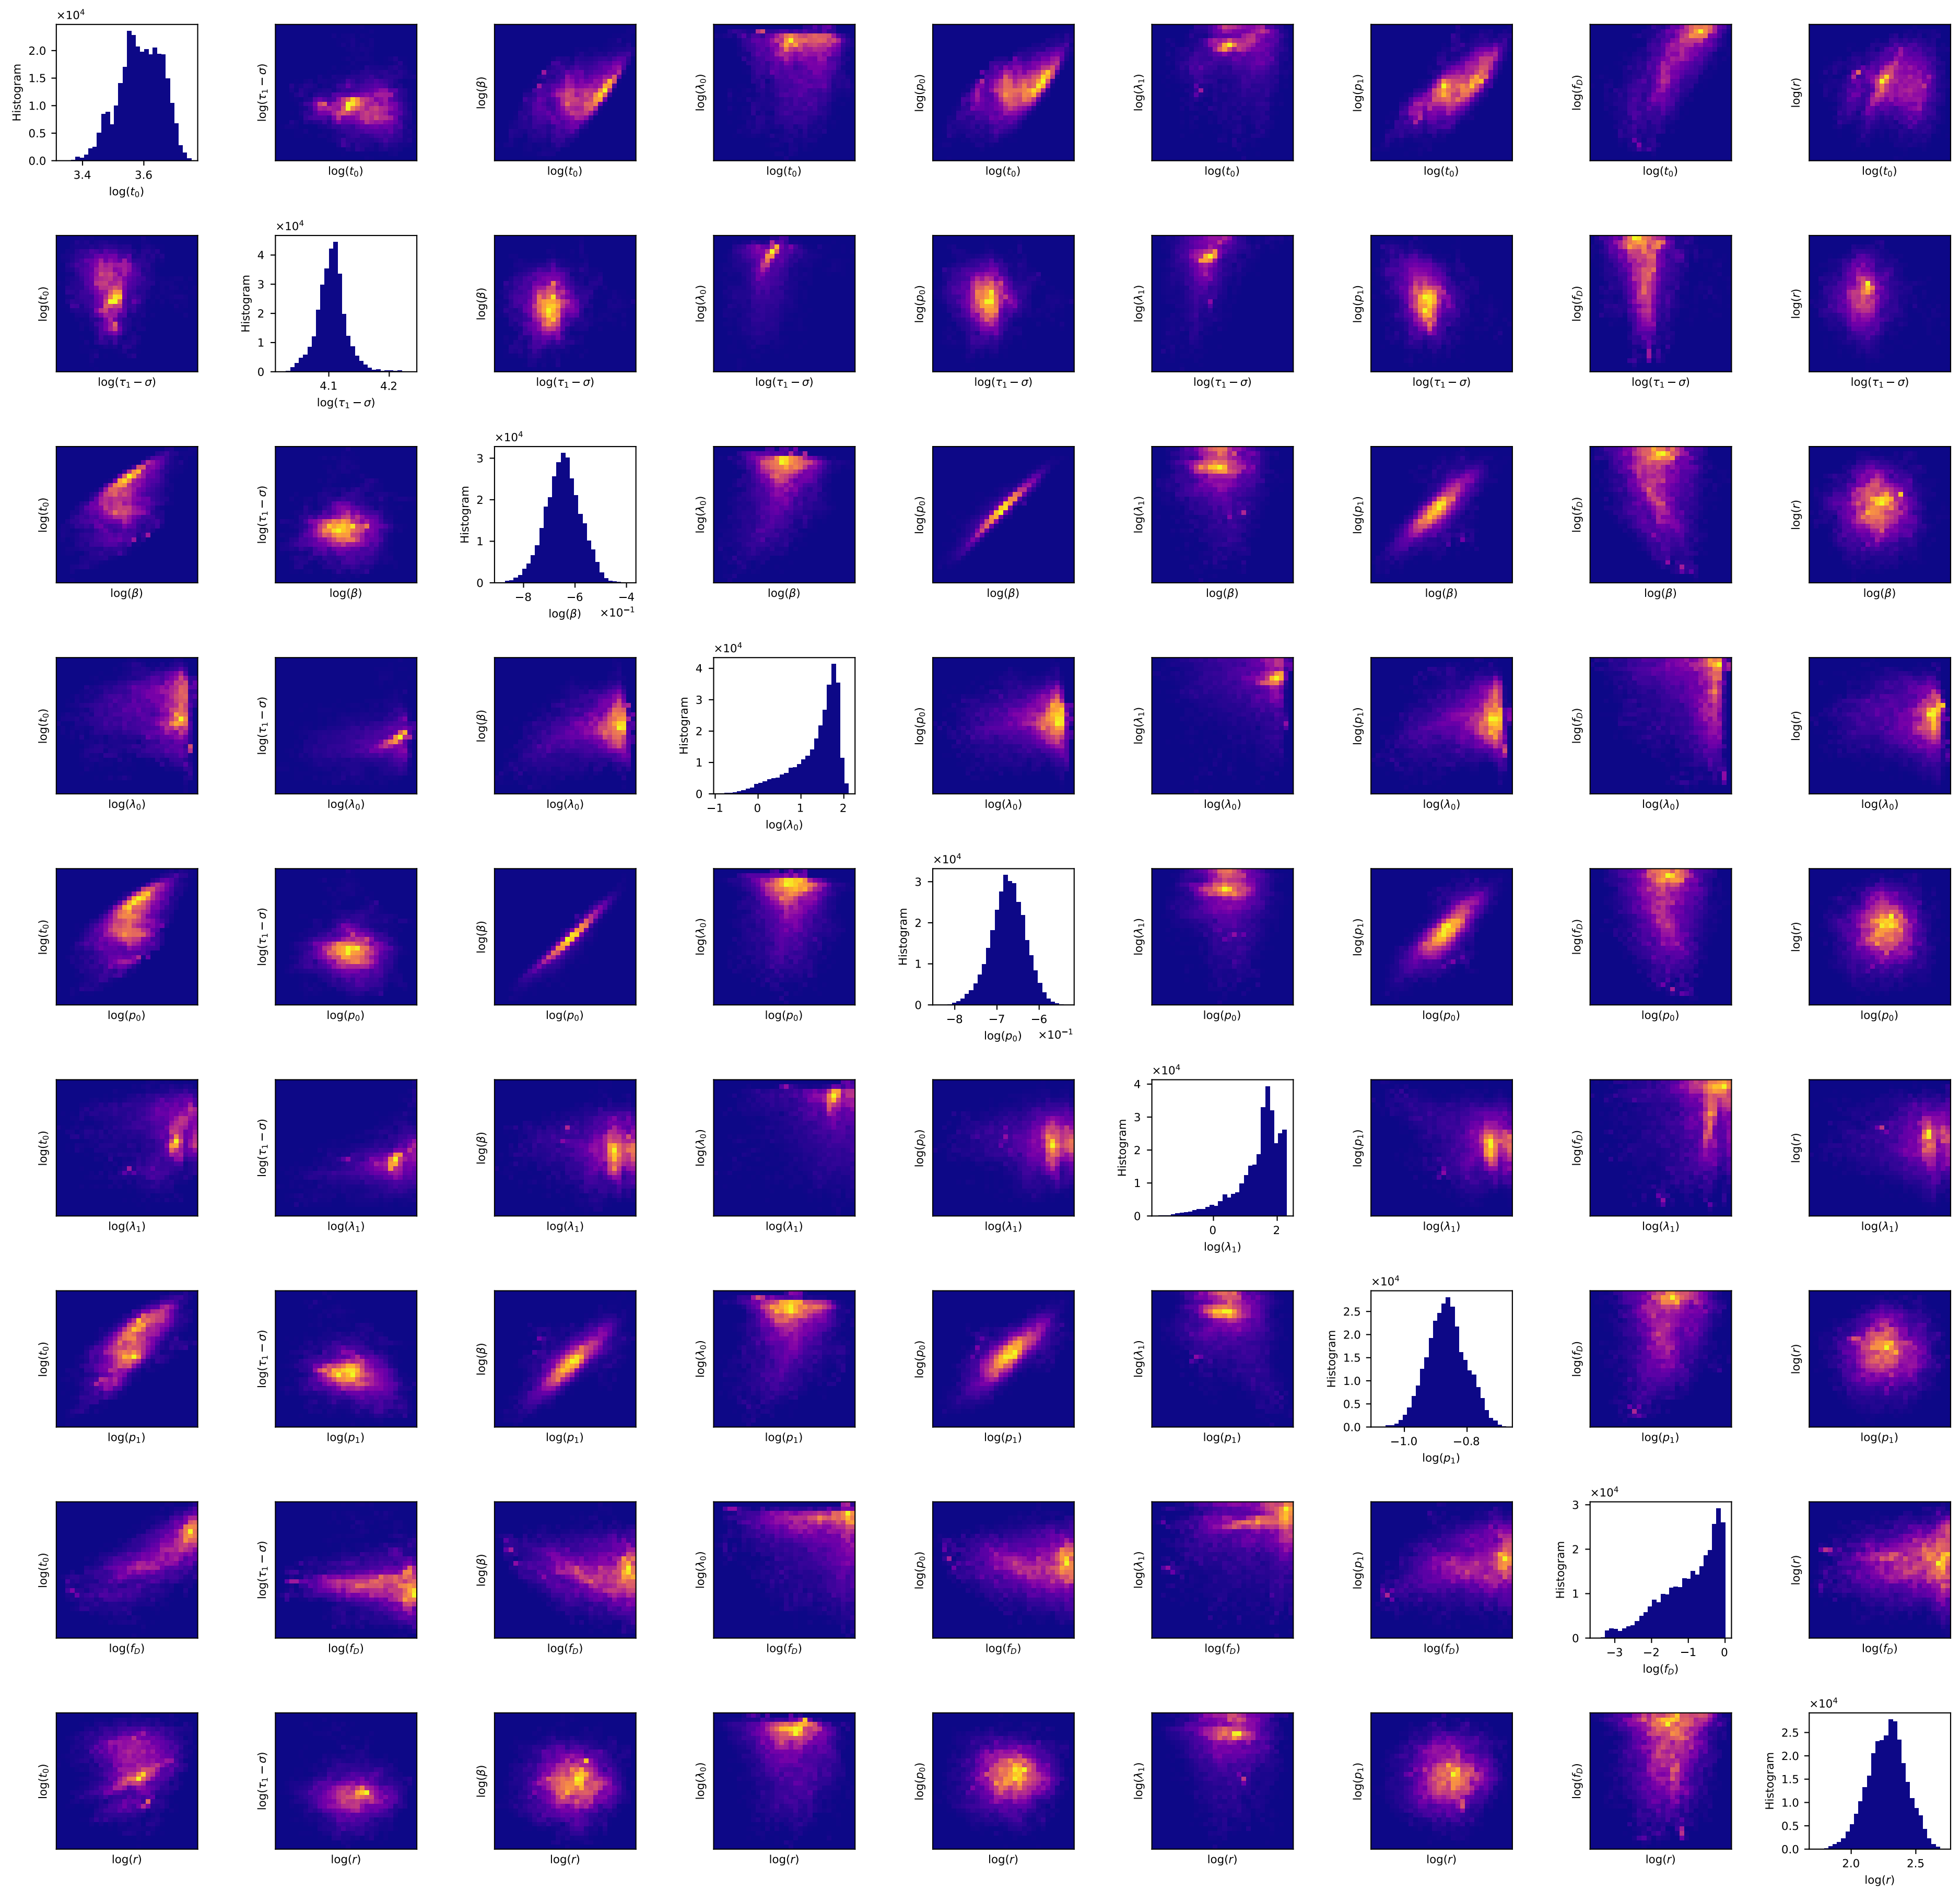

## Arkansas

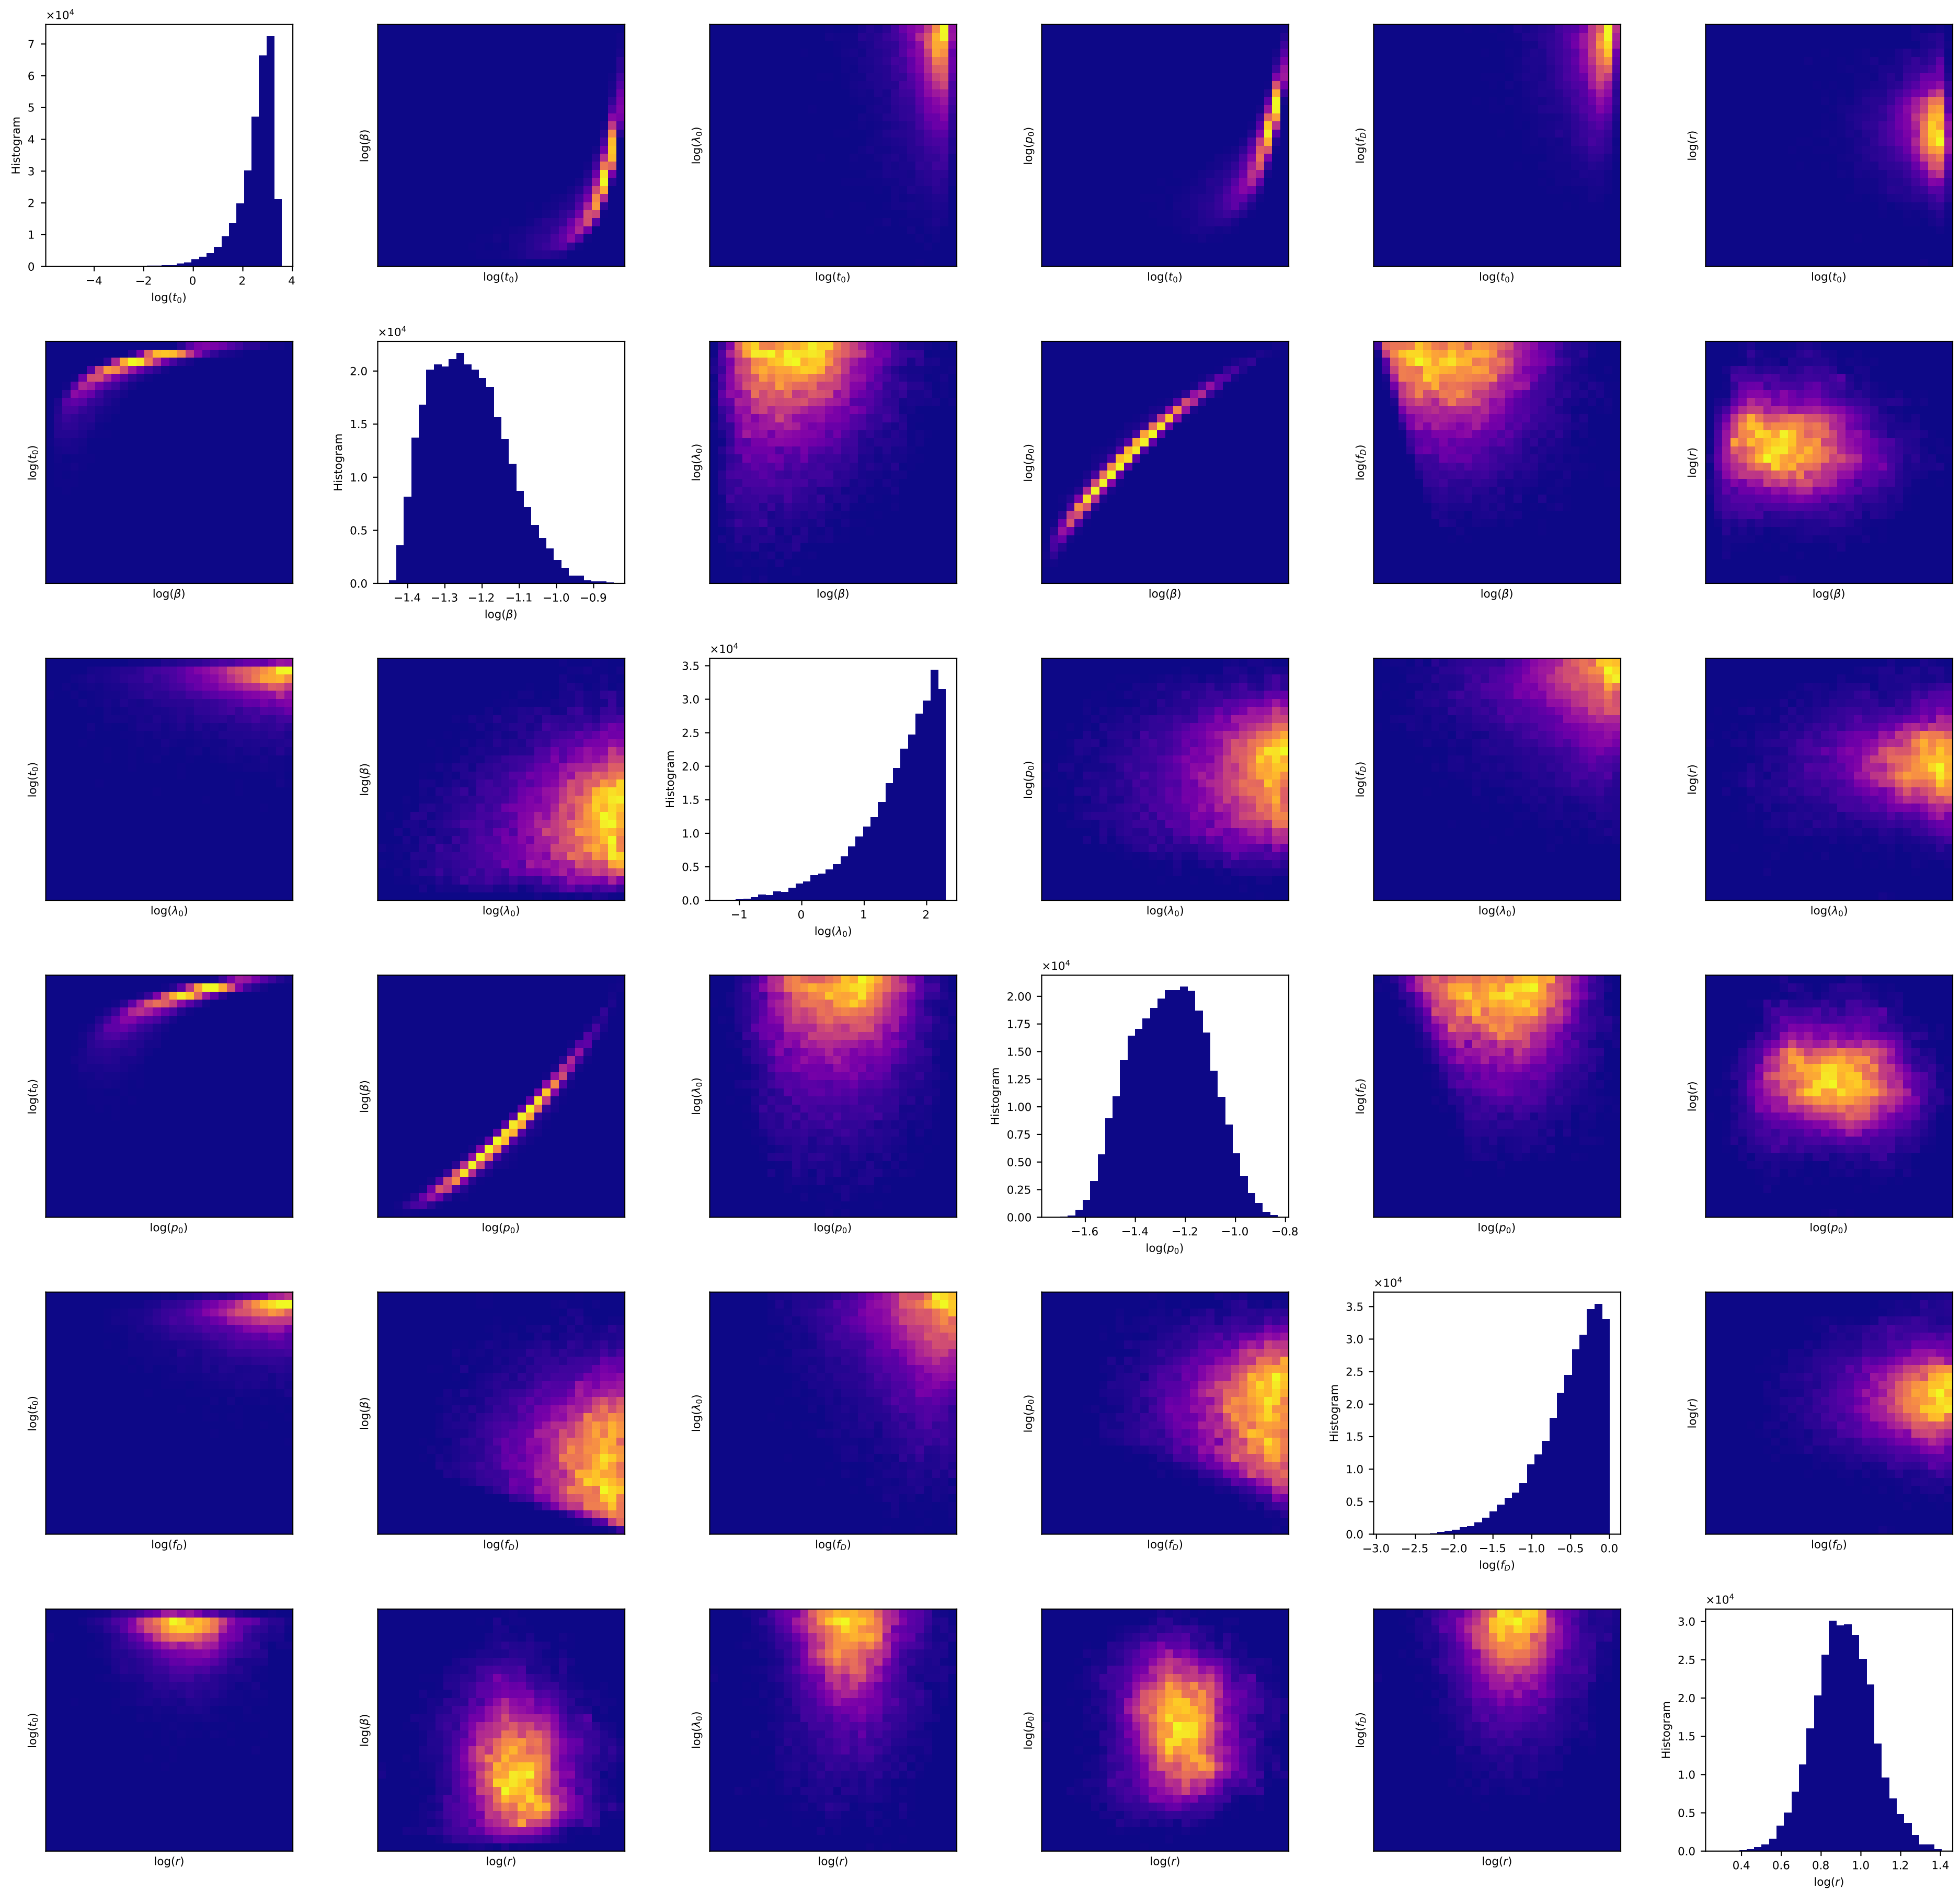

# California

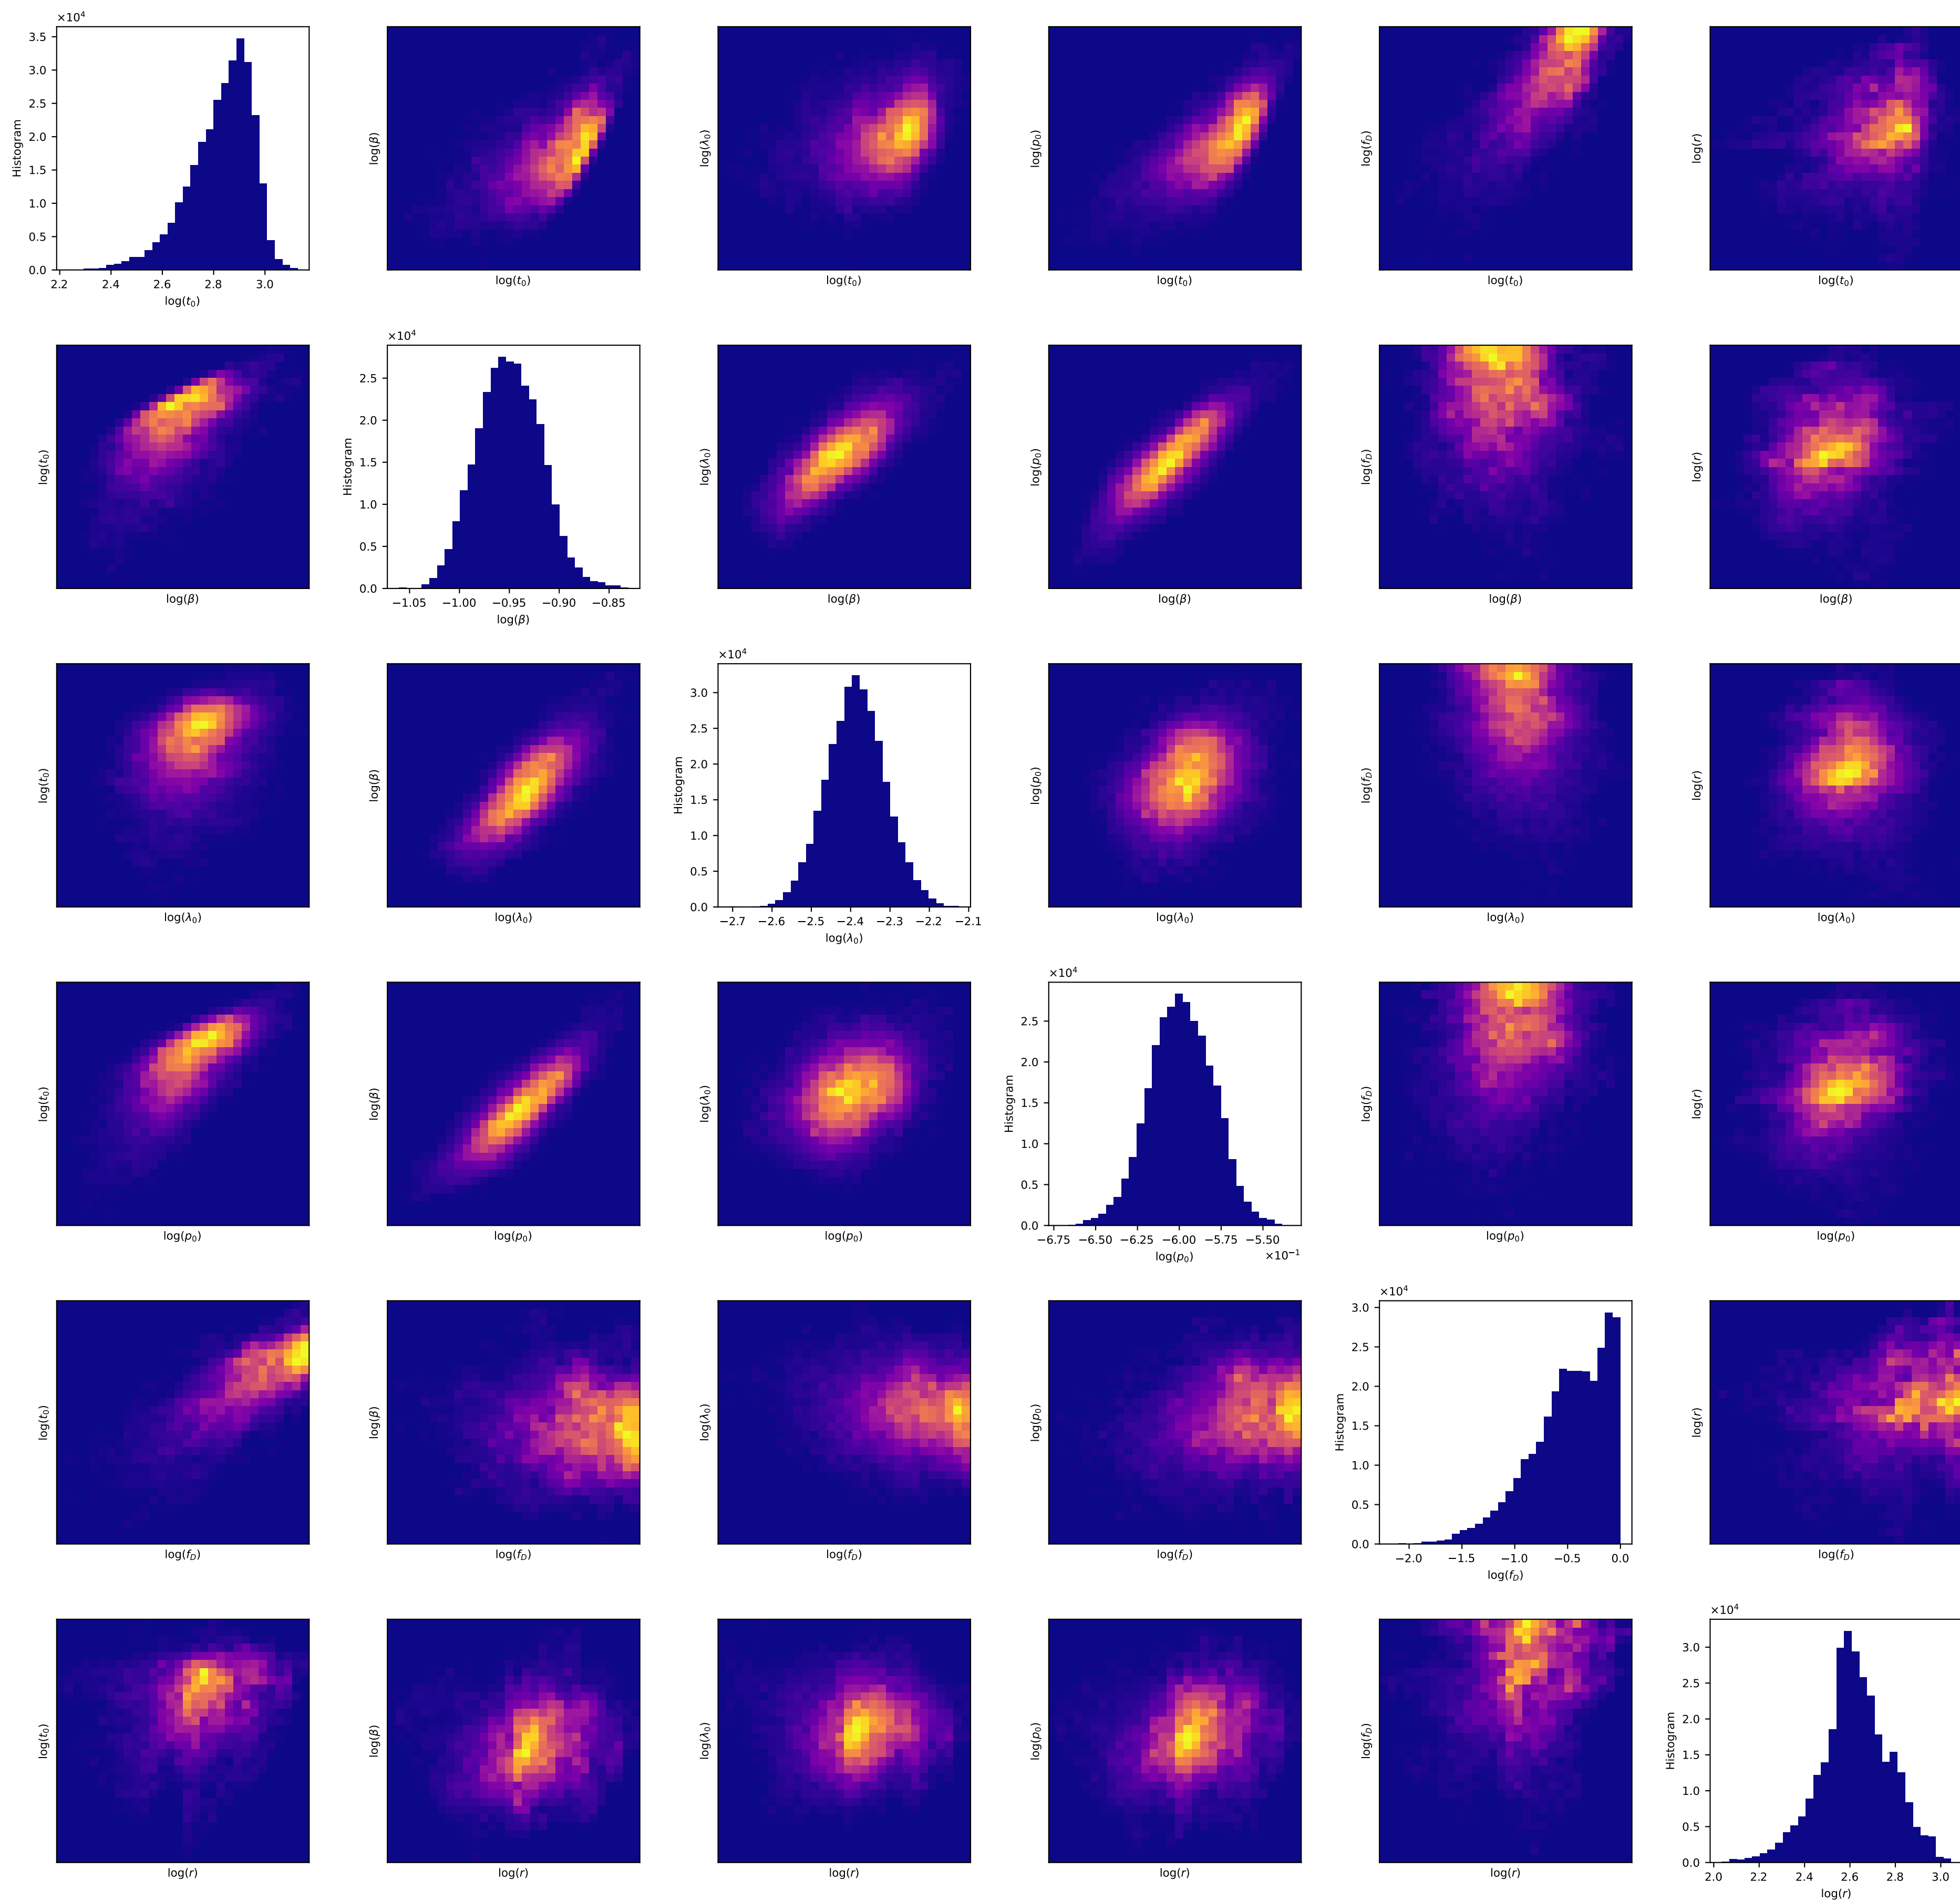

# Colorado

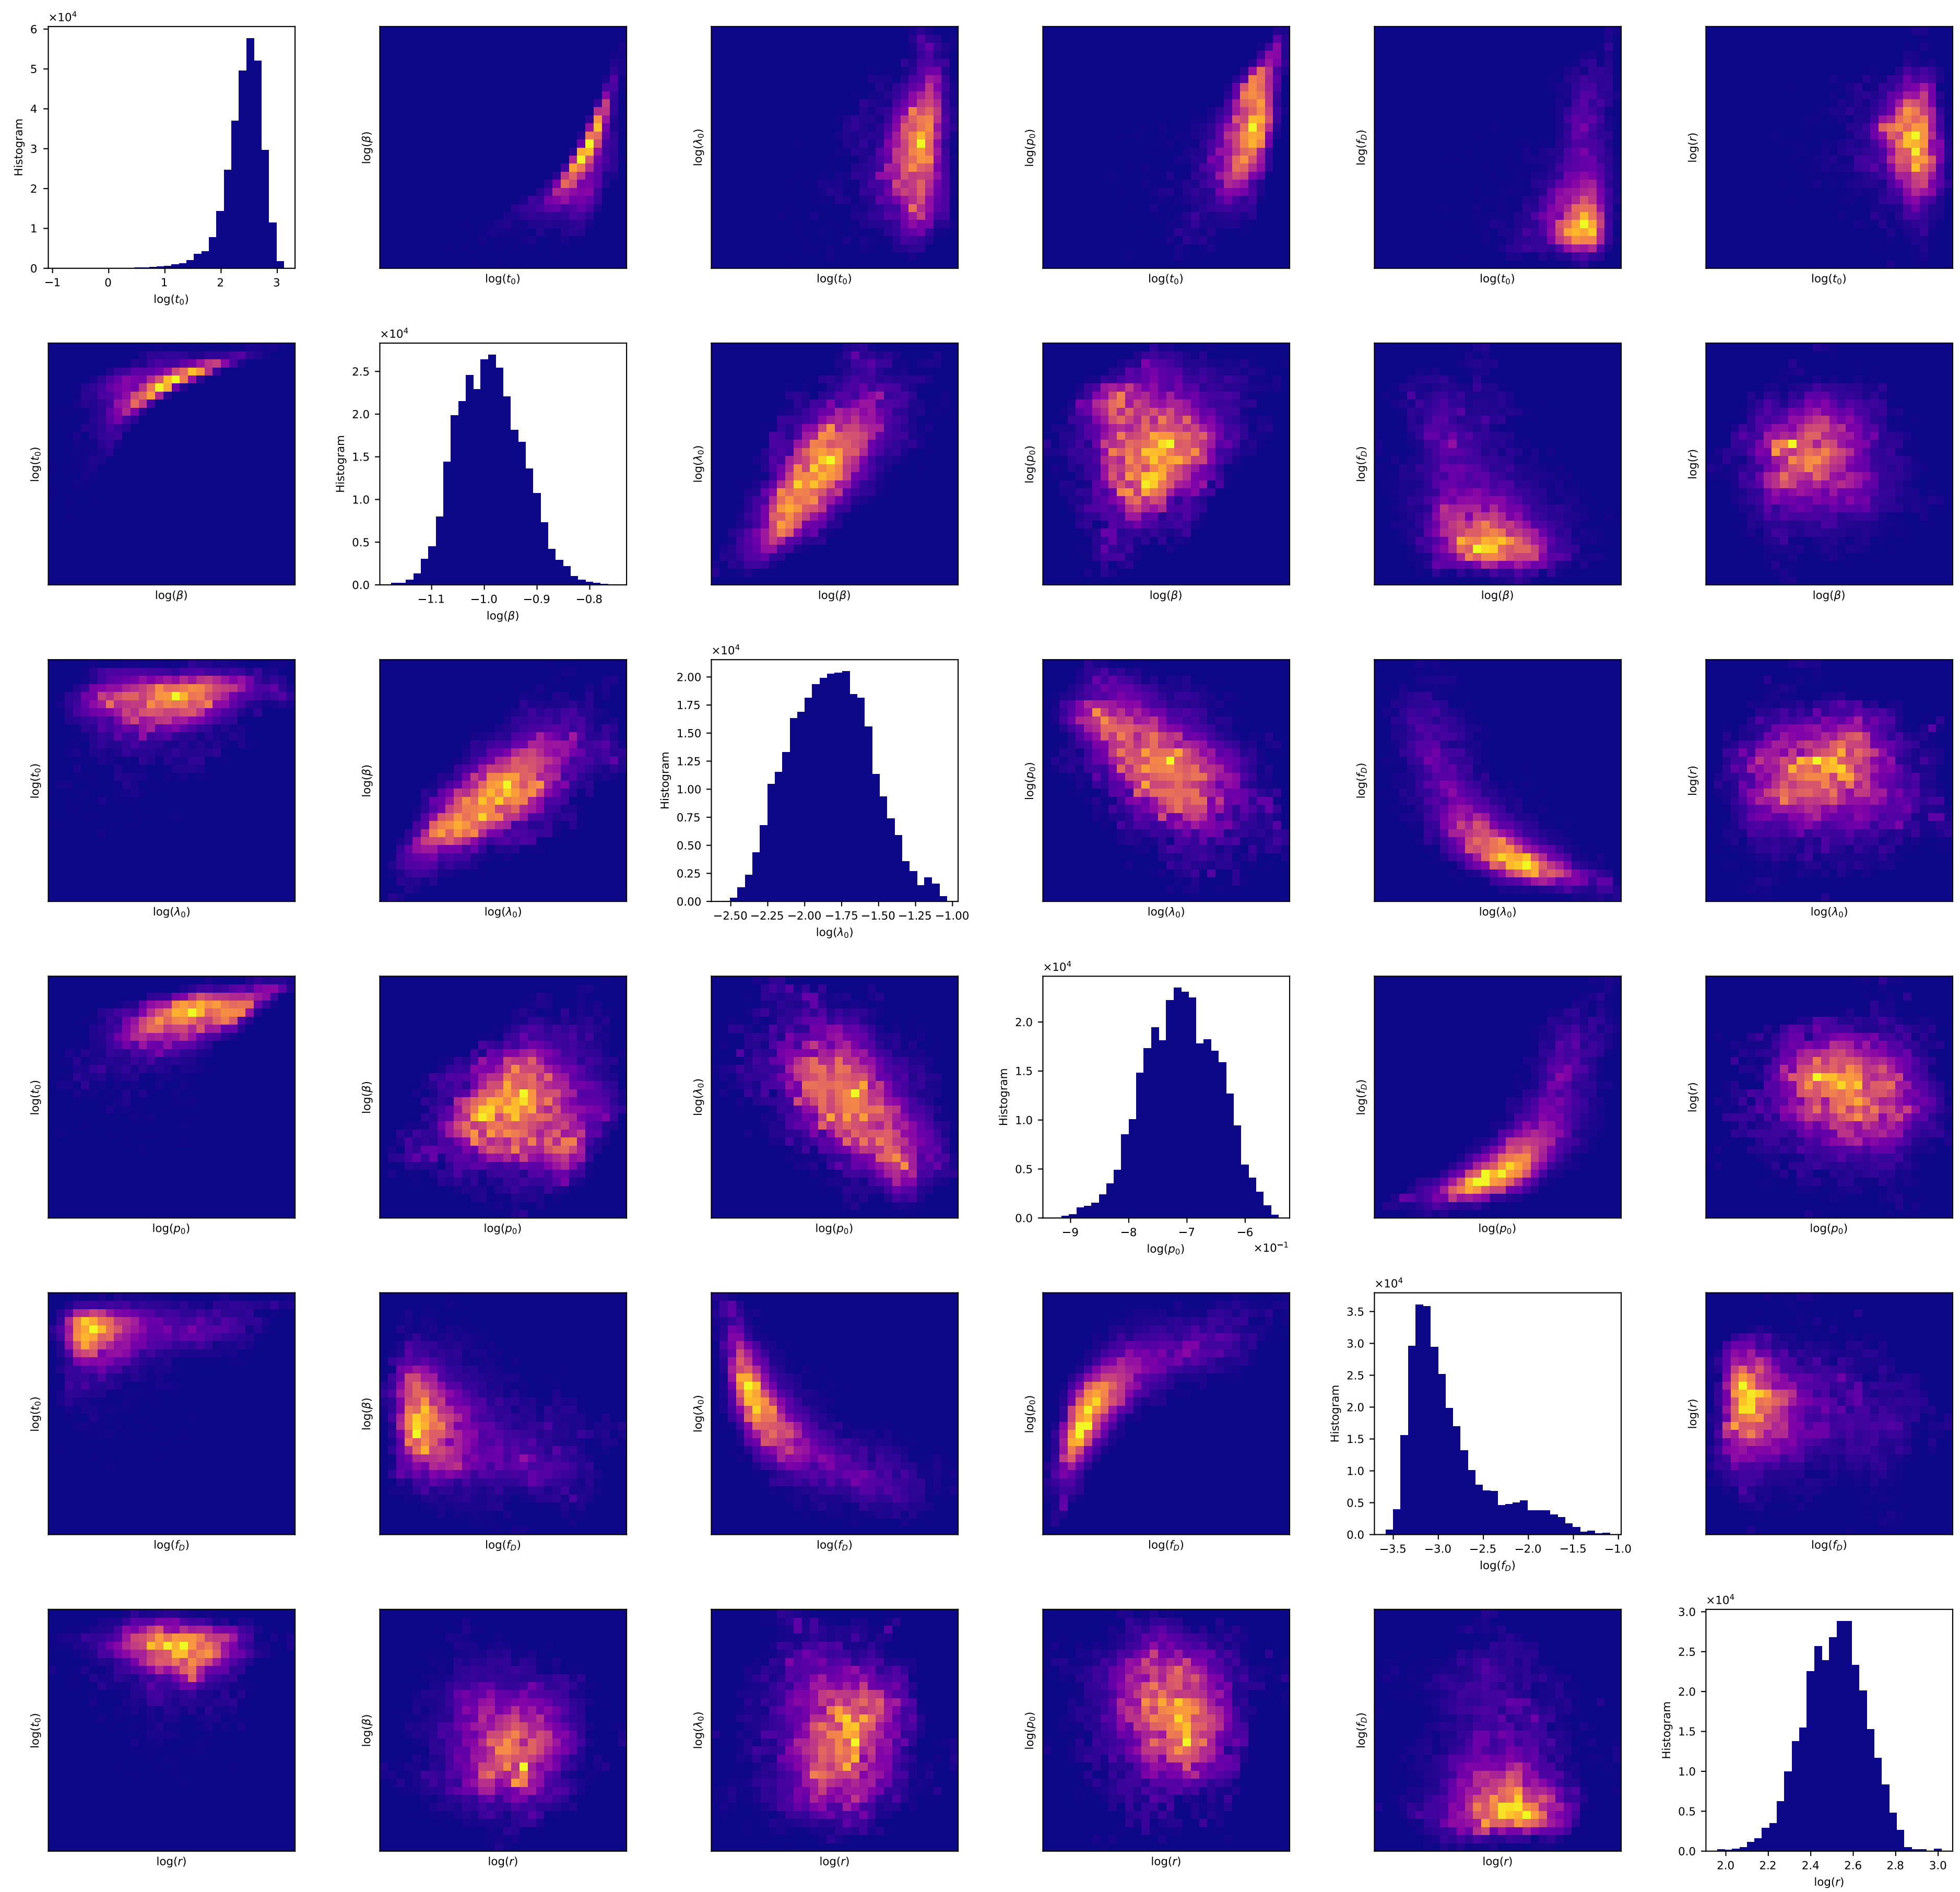

# Connecticut

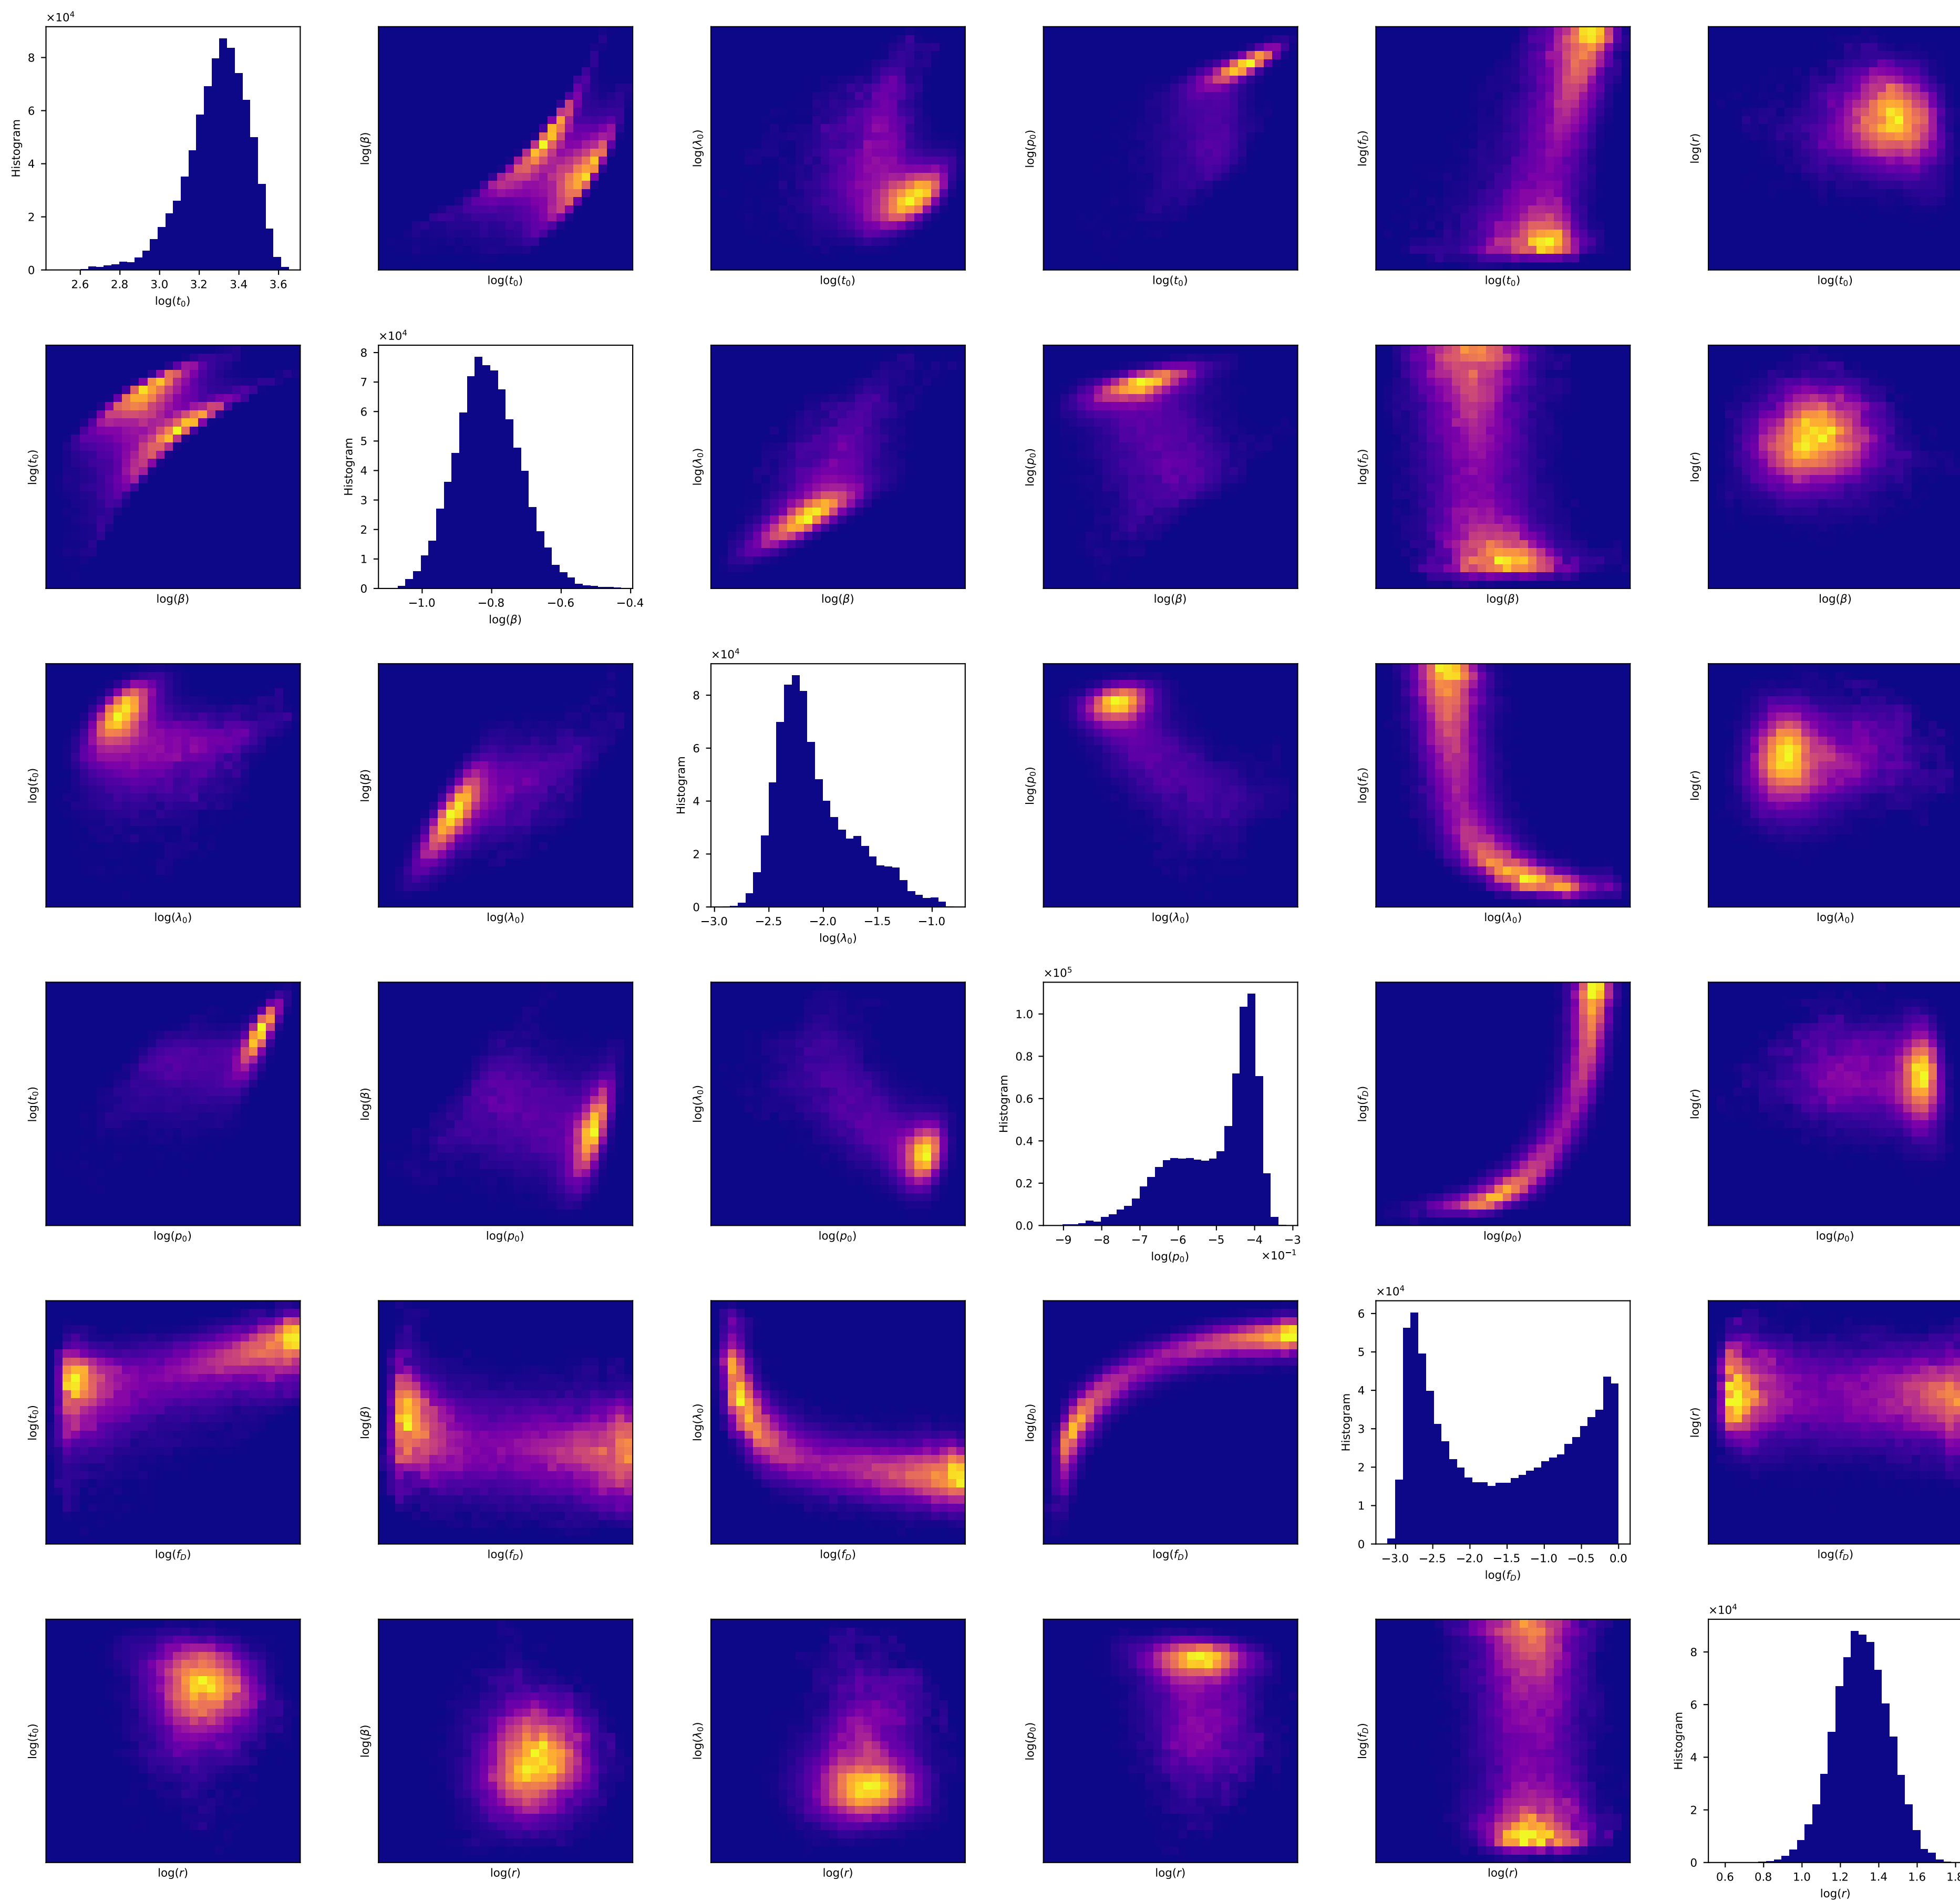

# Delaware

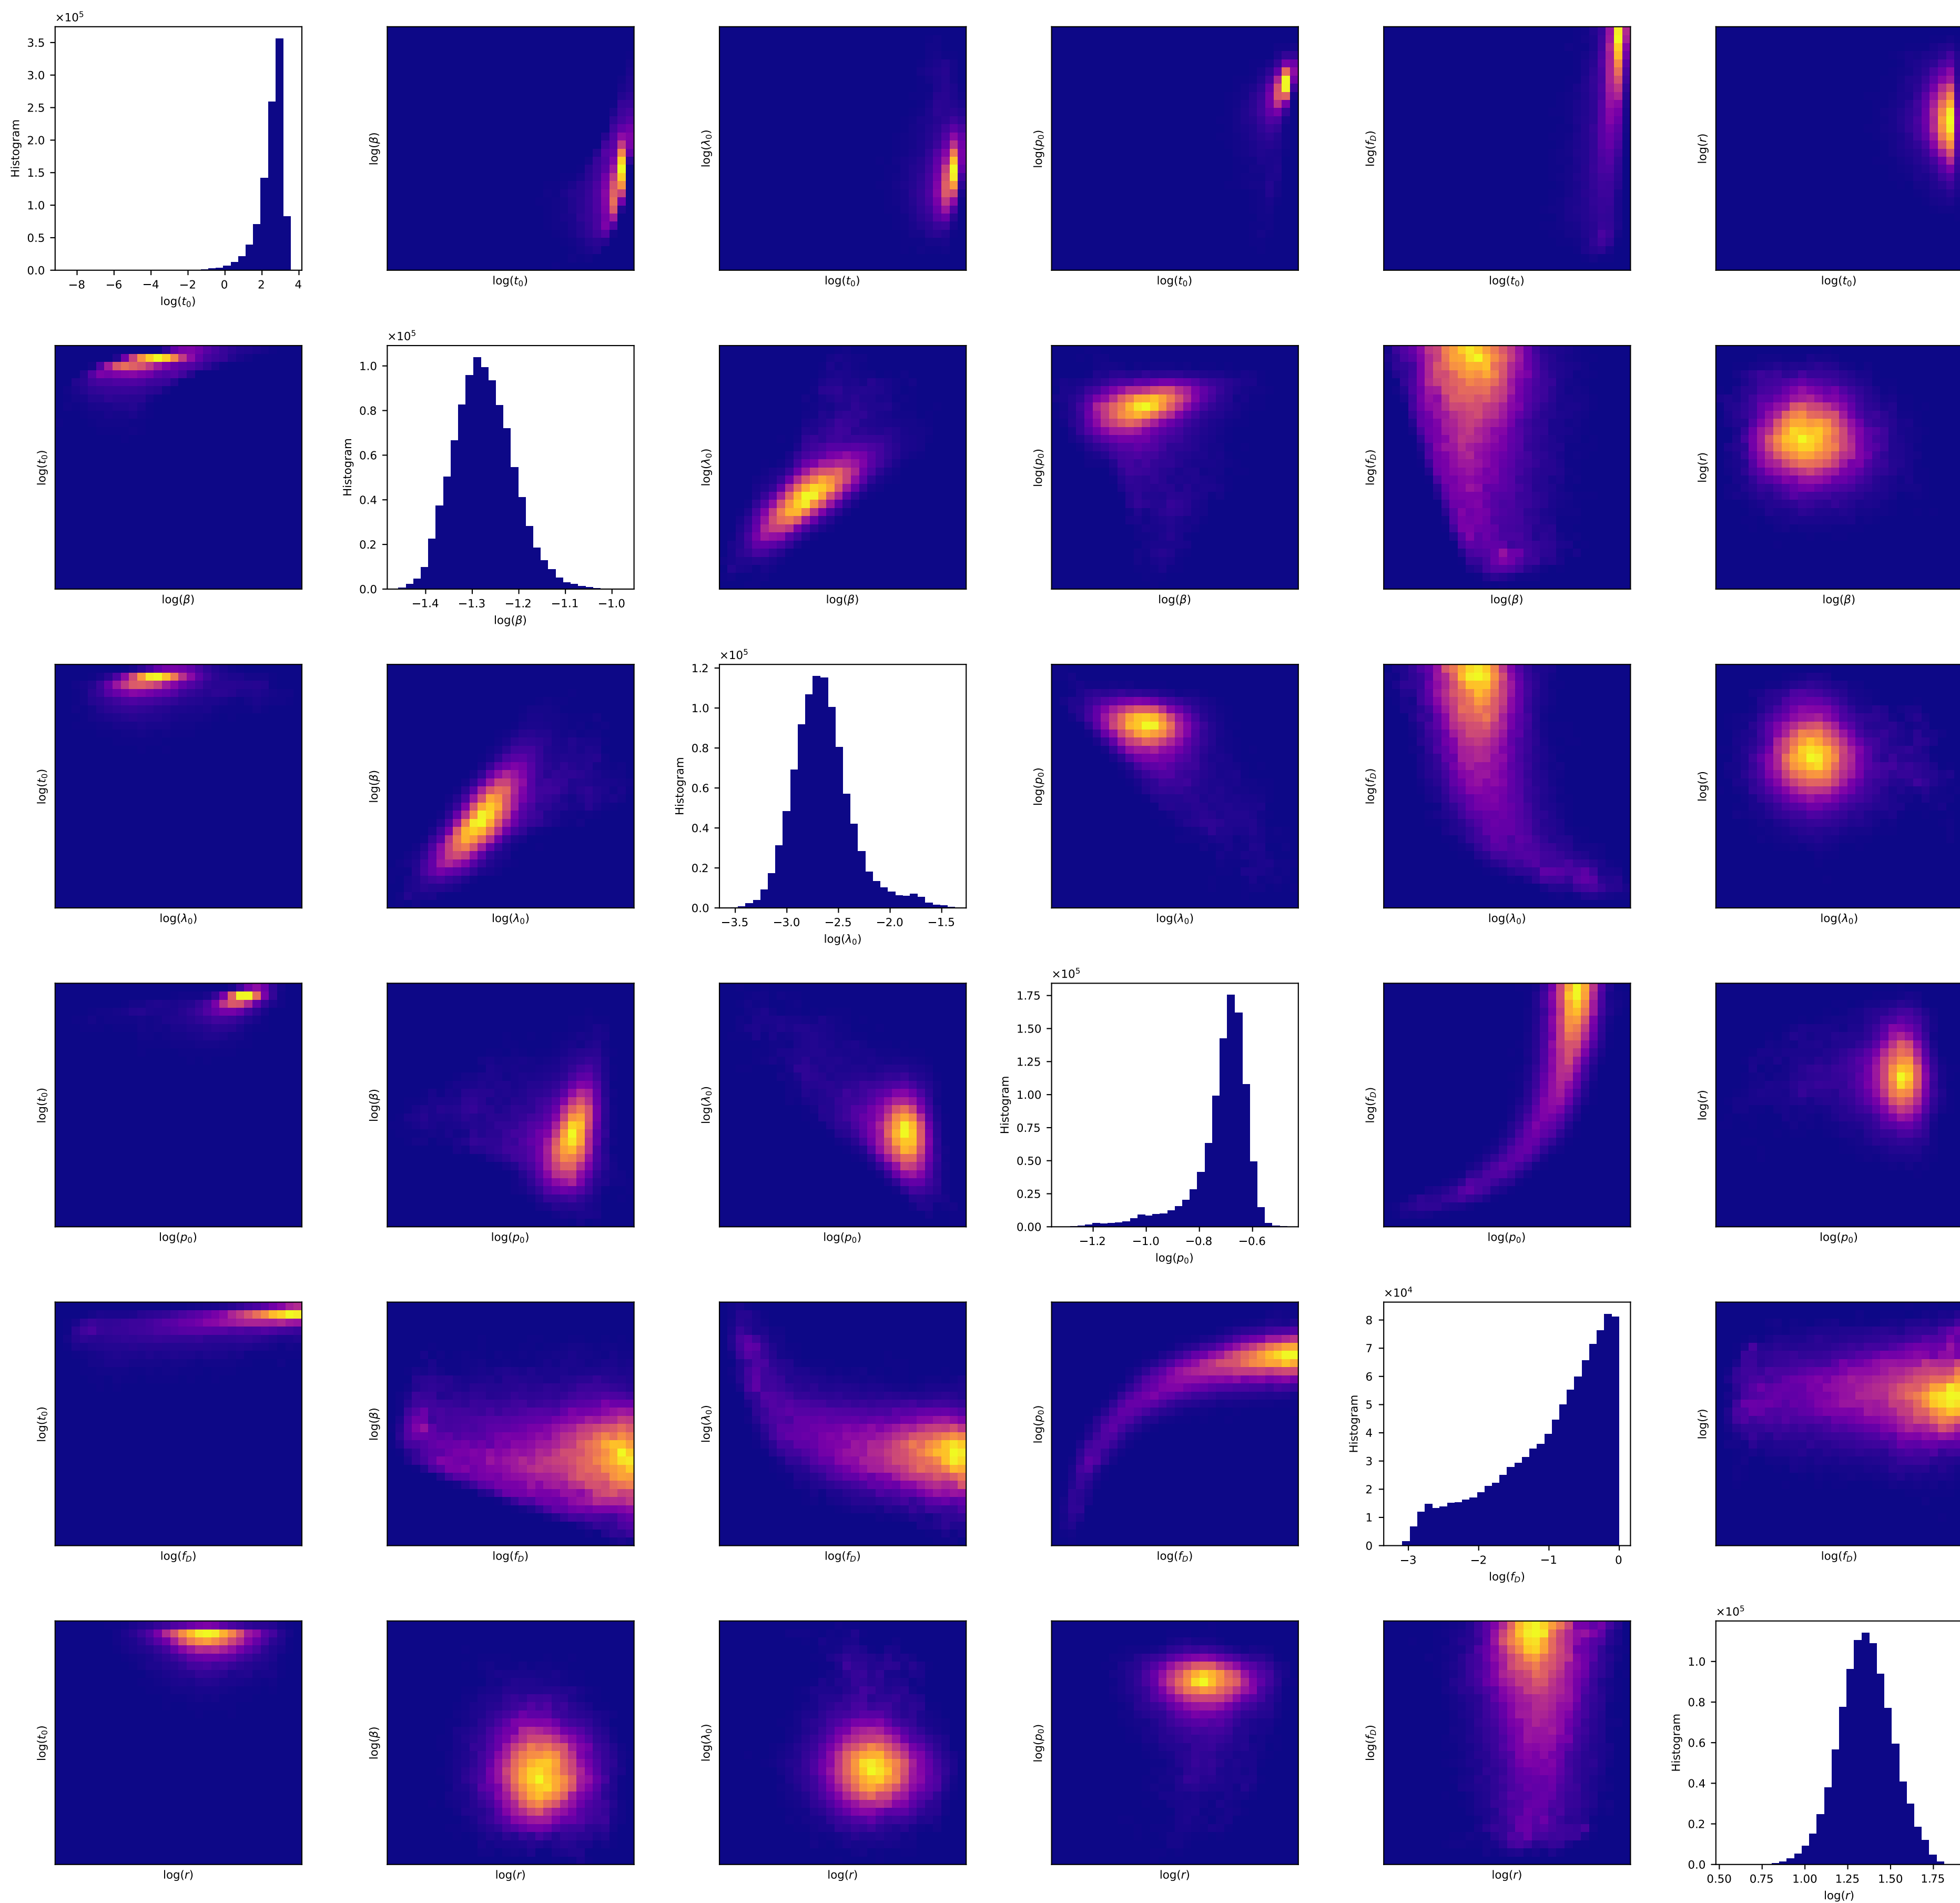

# Florida

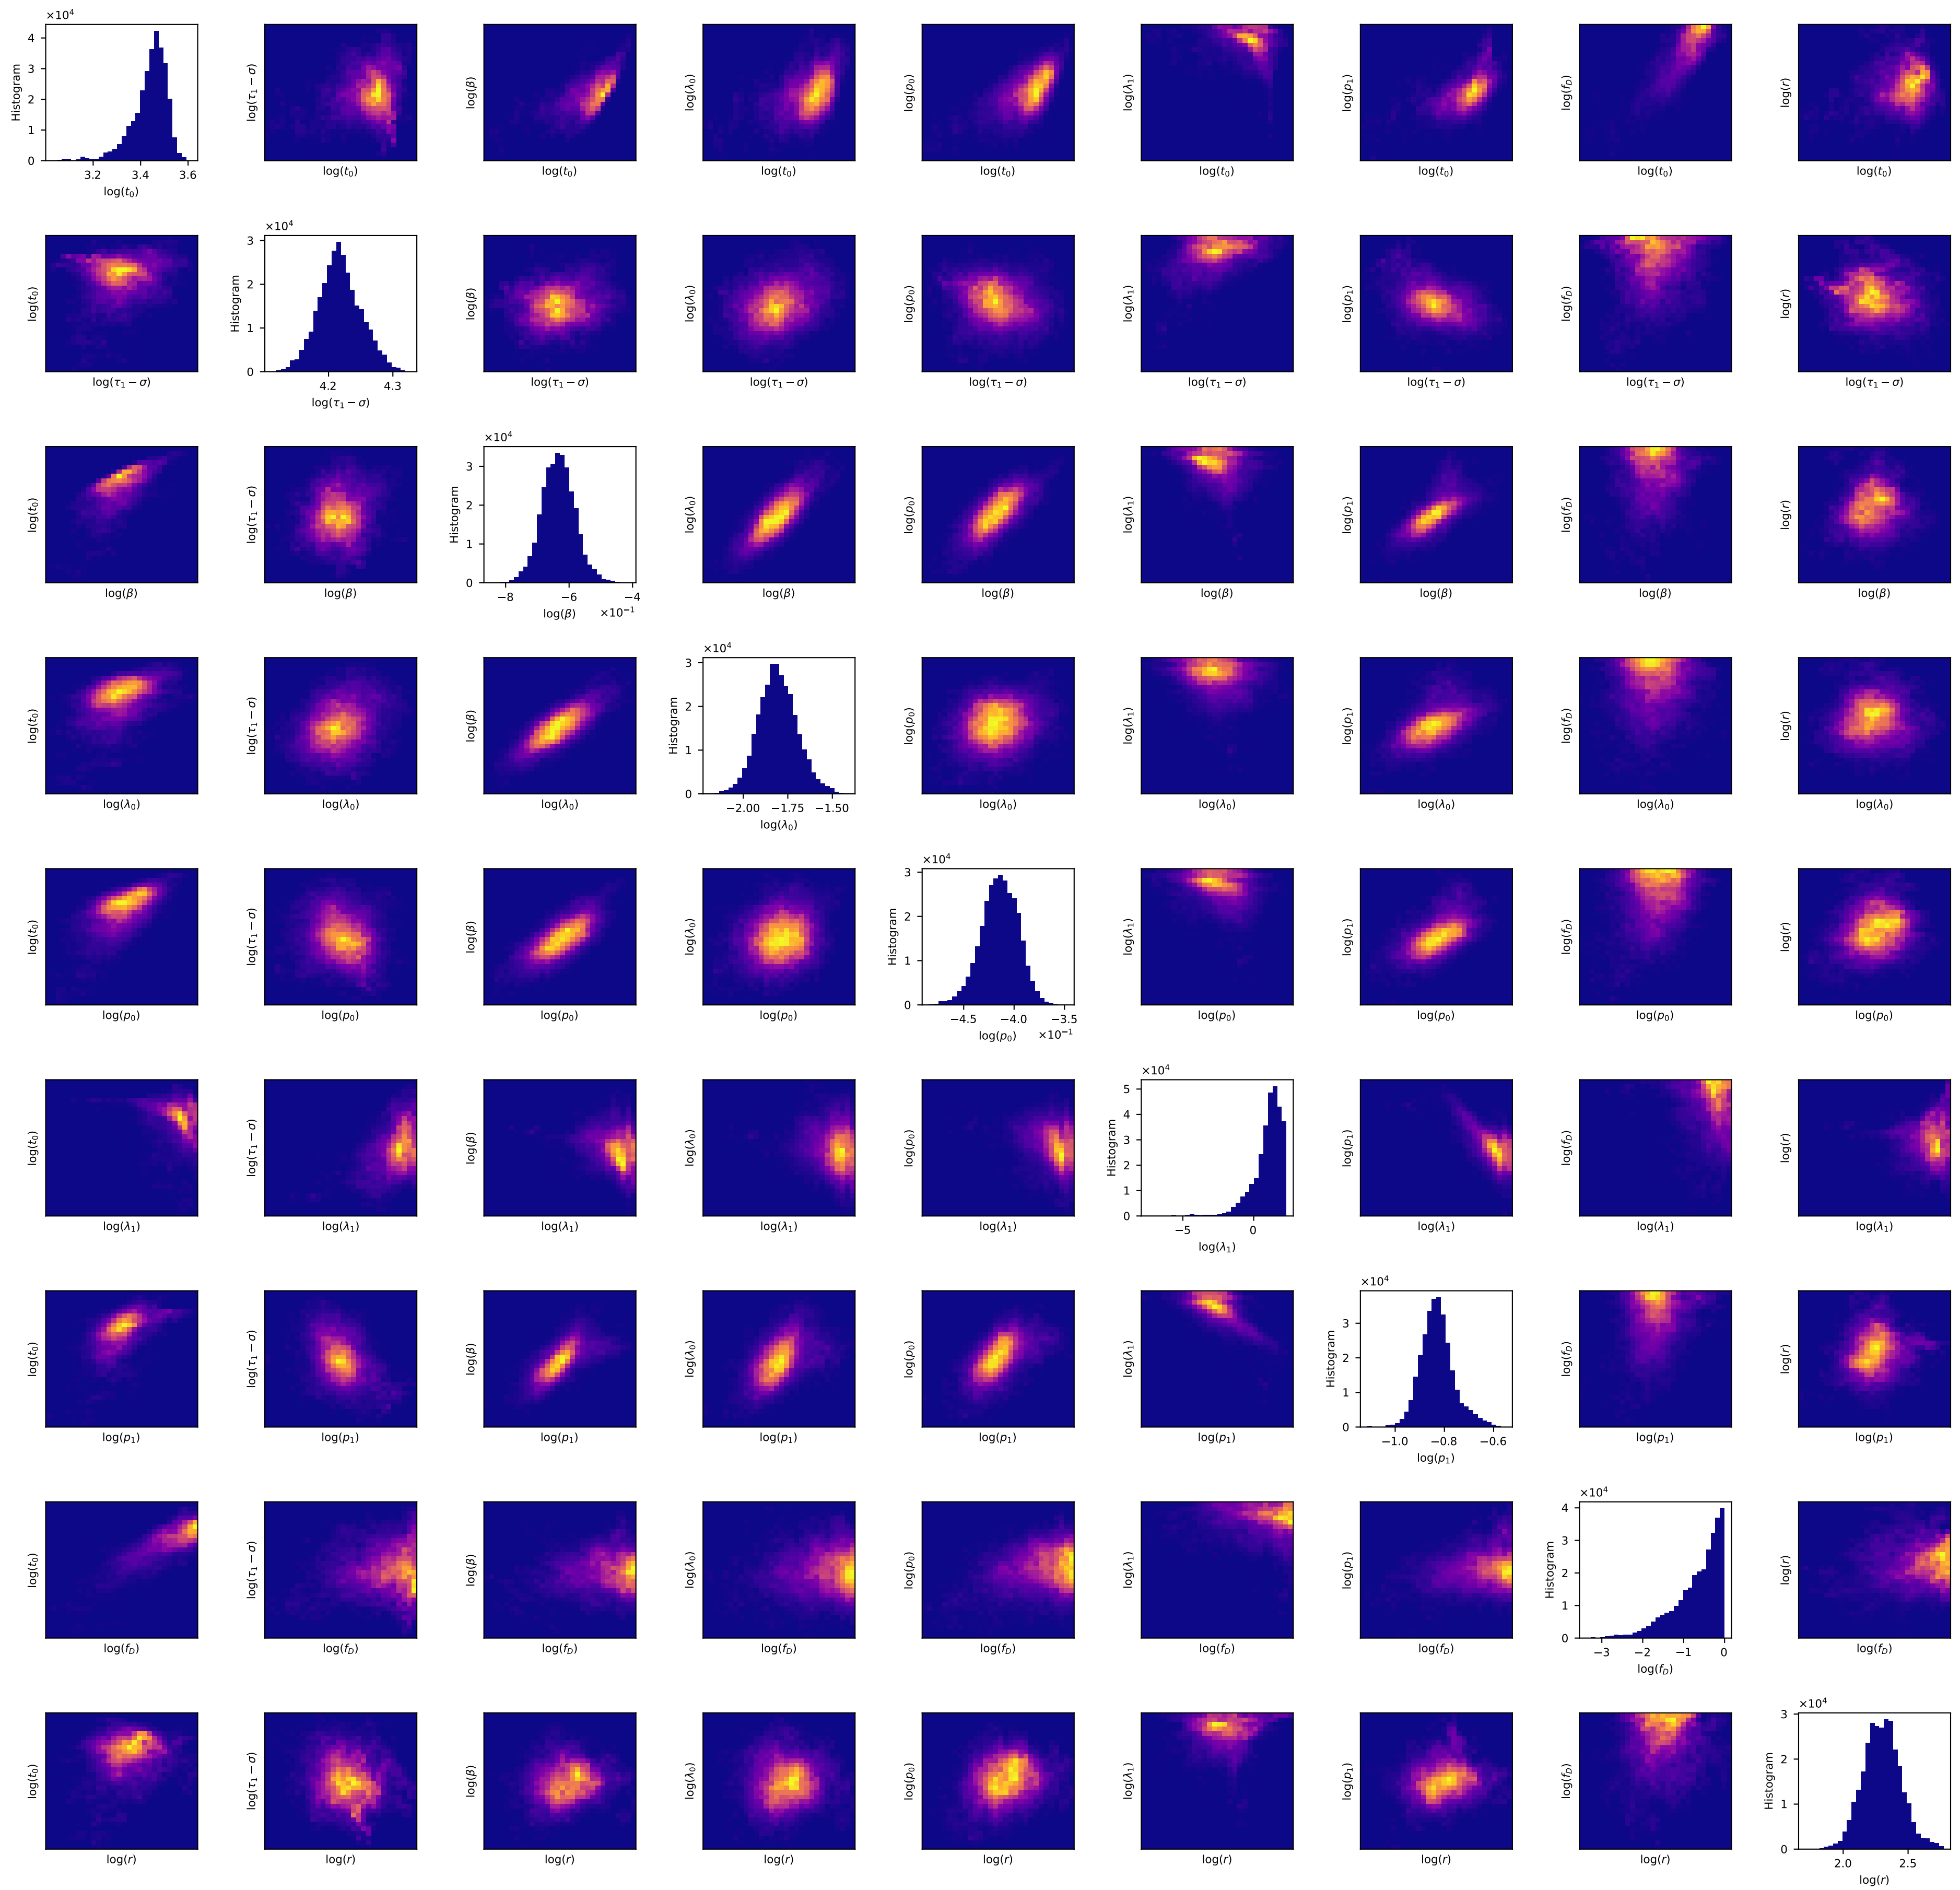

# Georgia

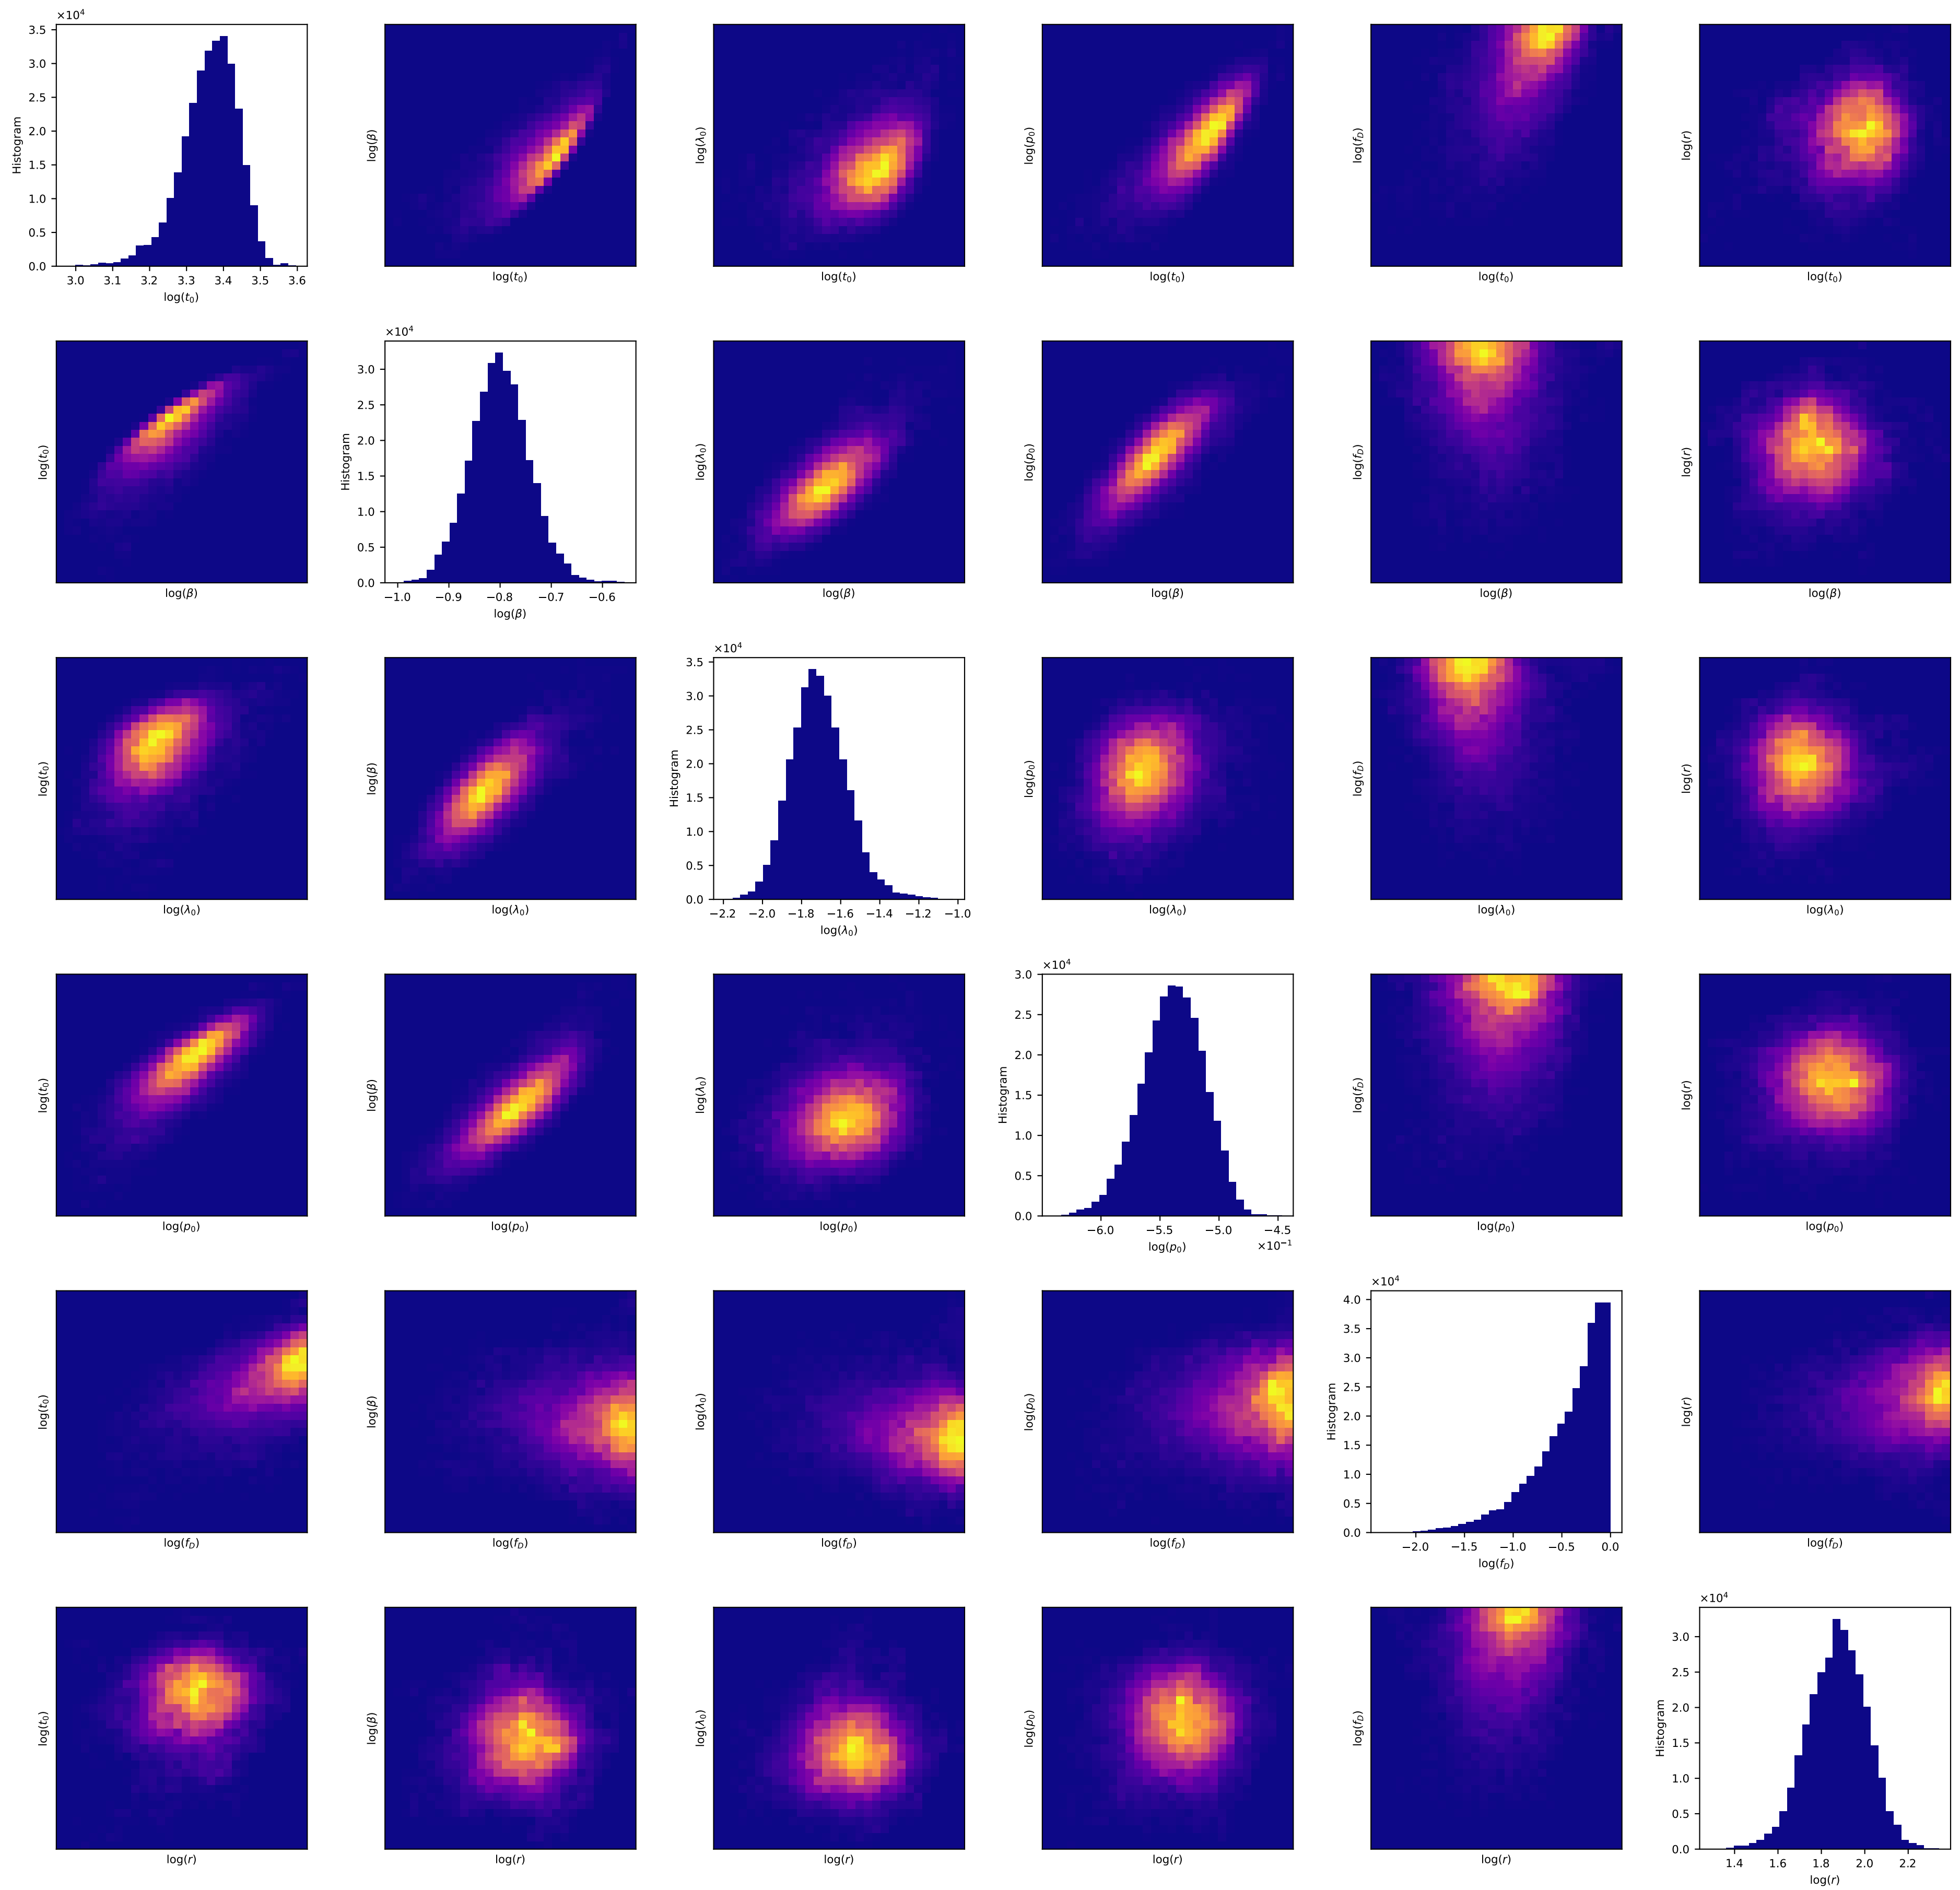



# Hawaii

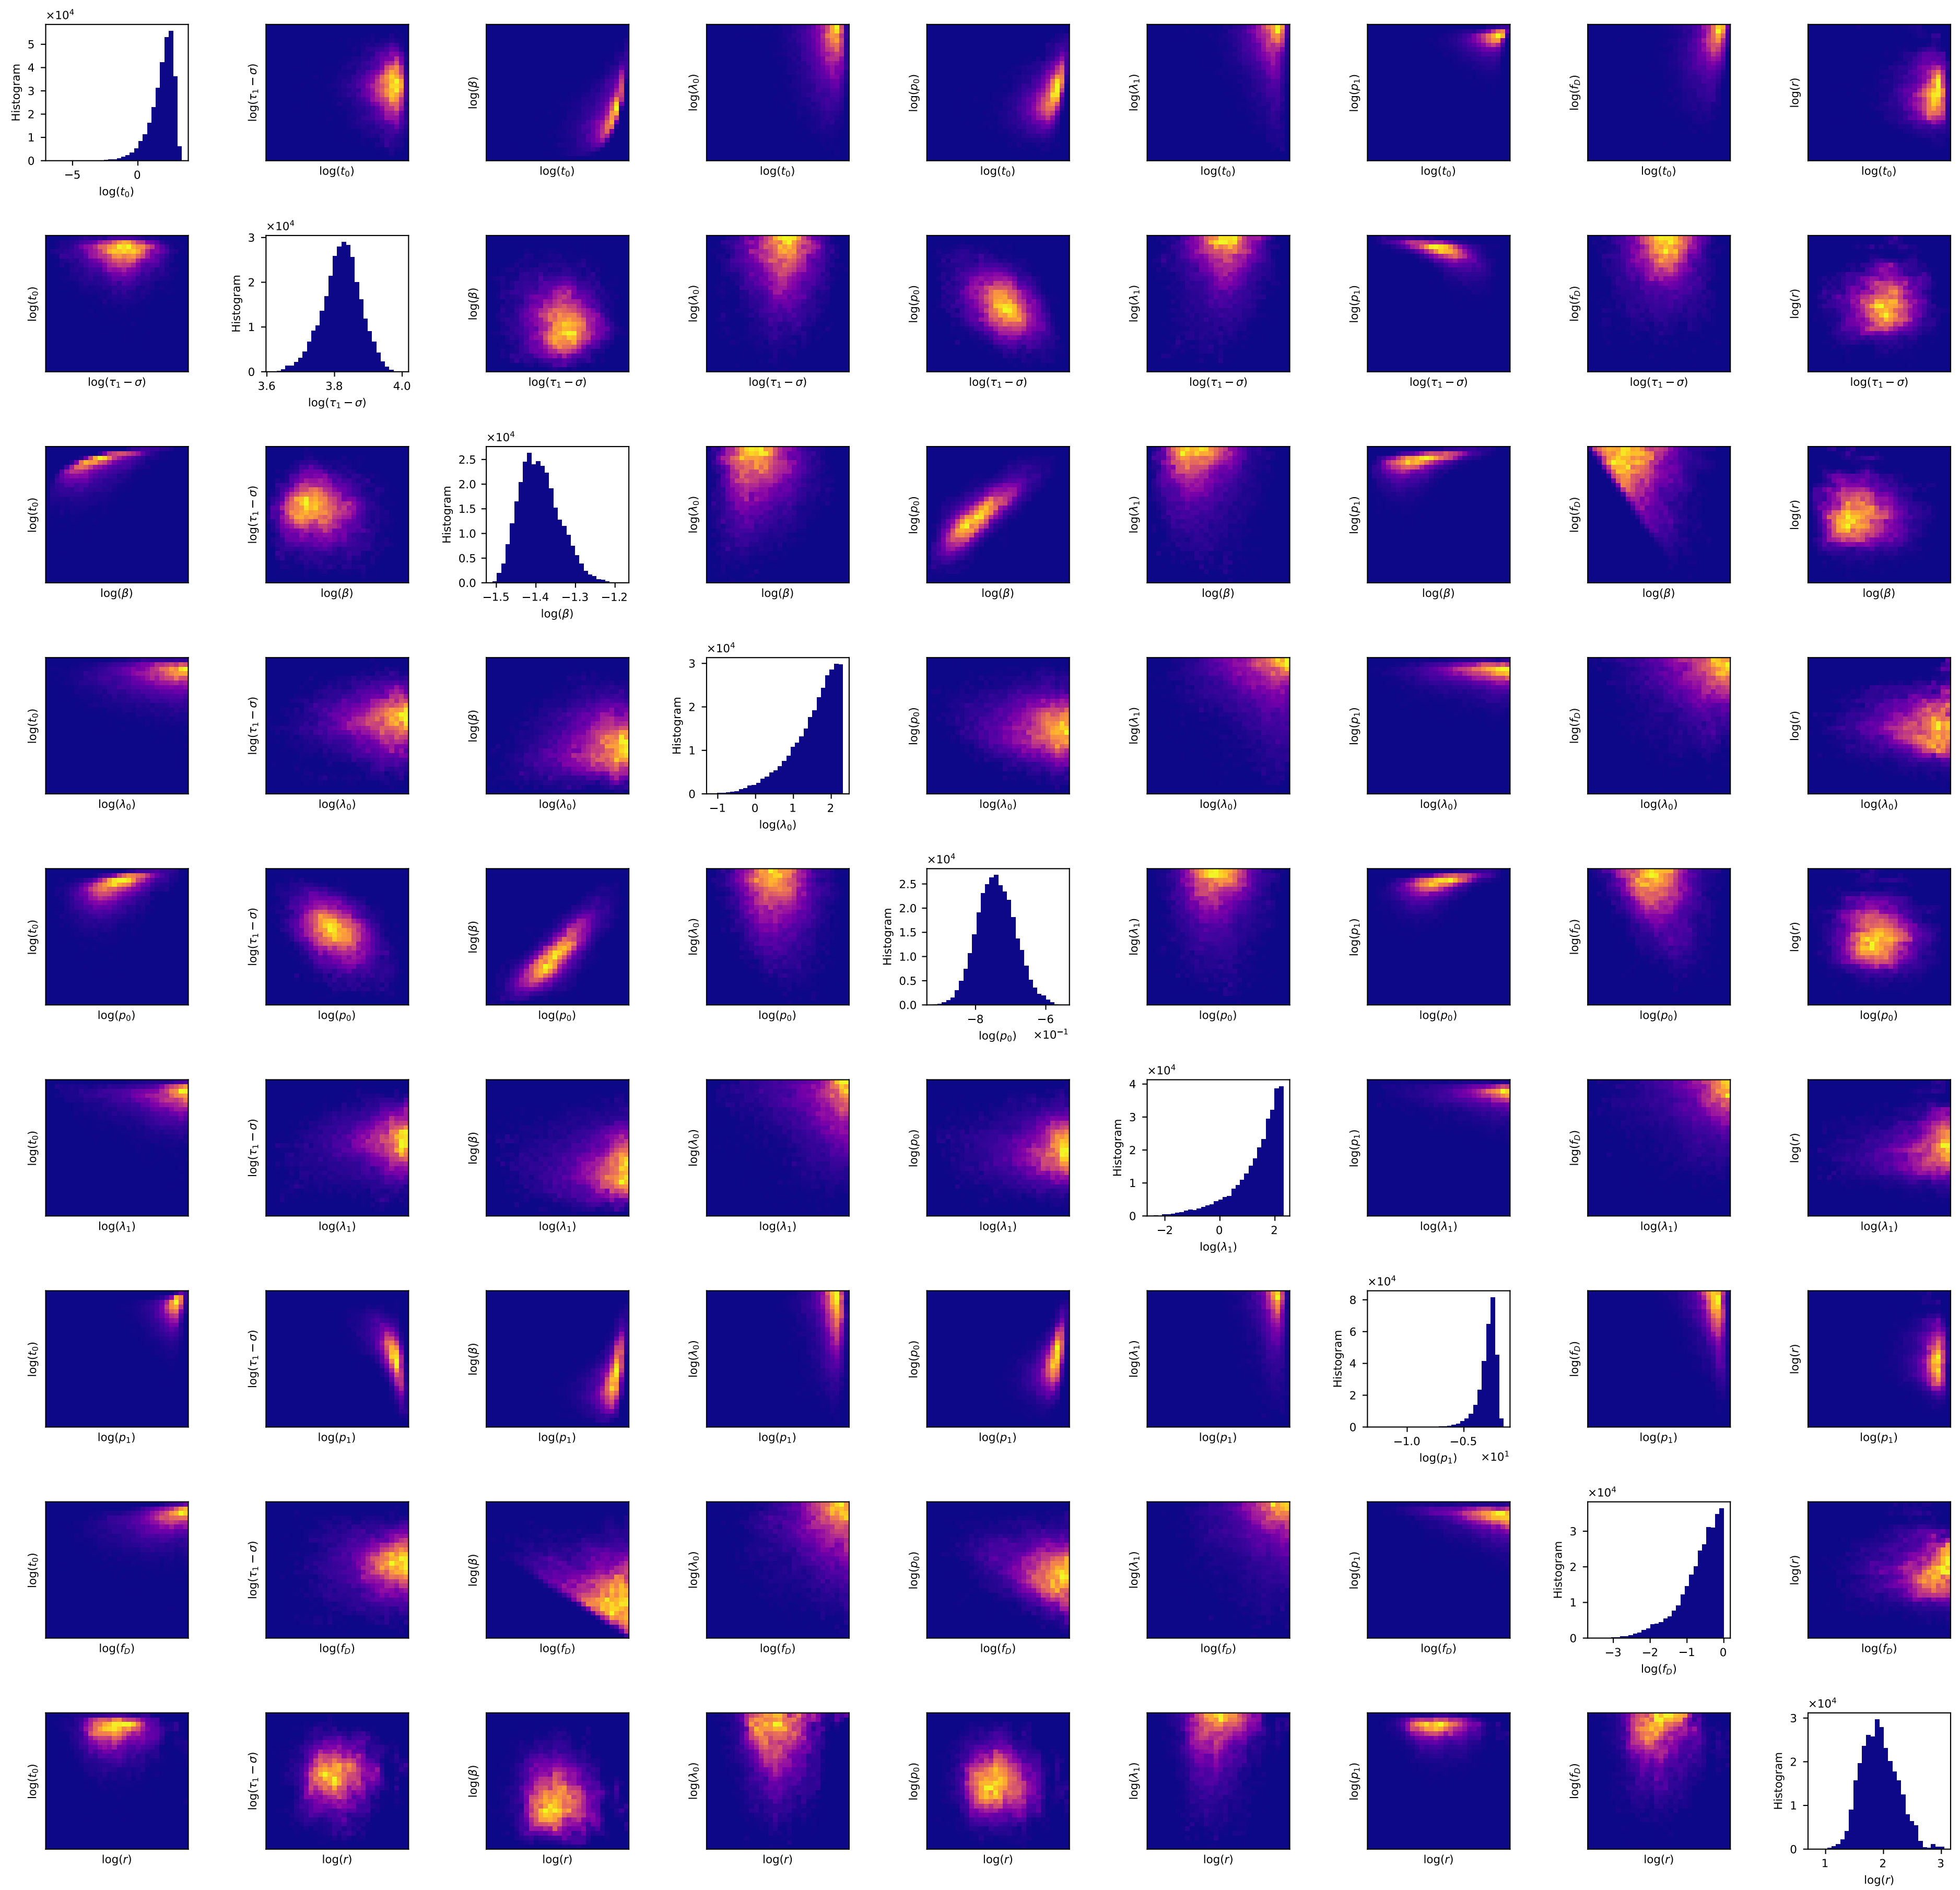

# Idaho

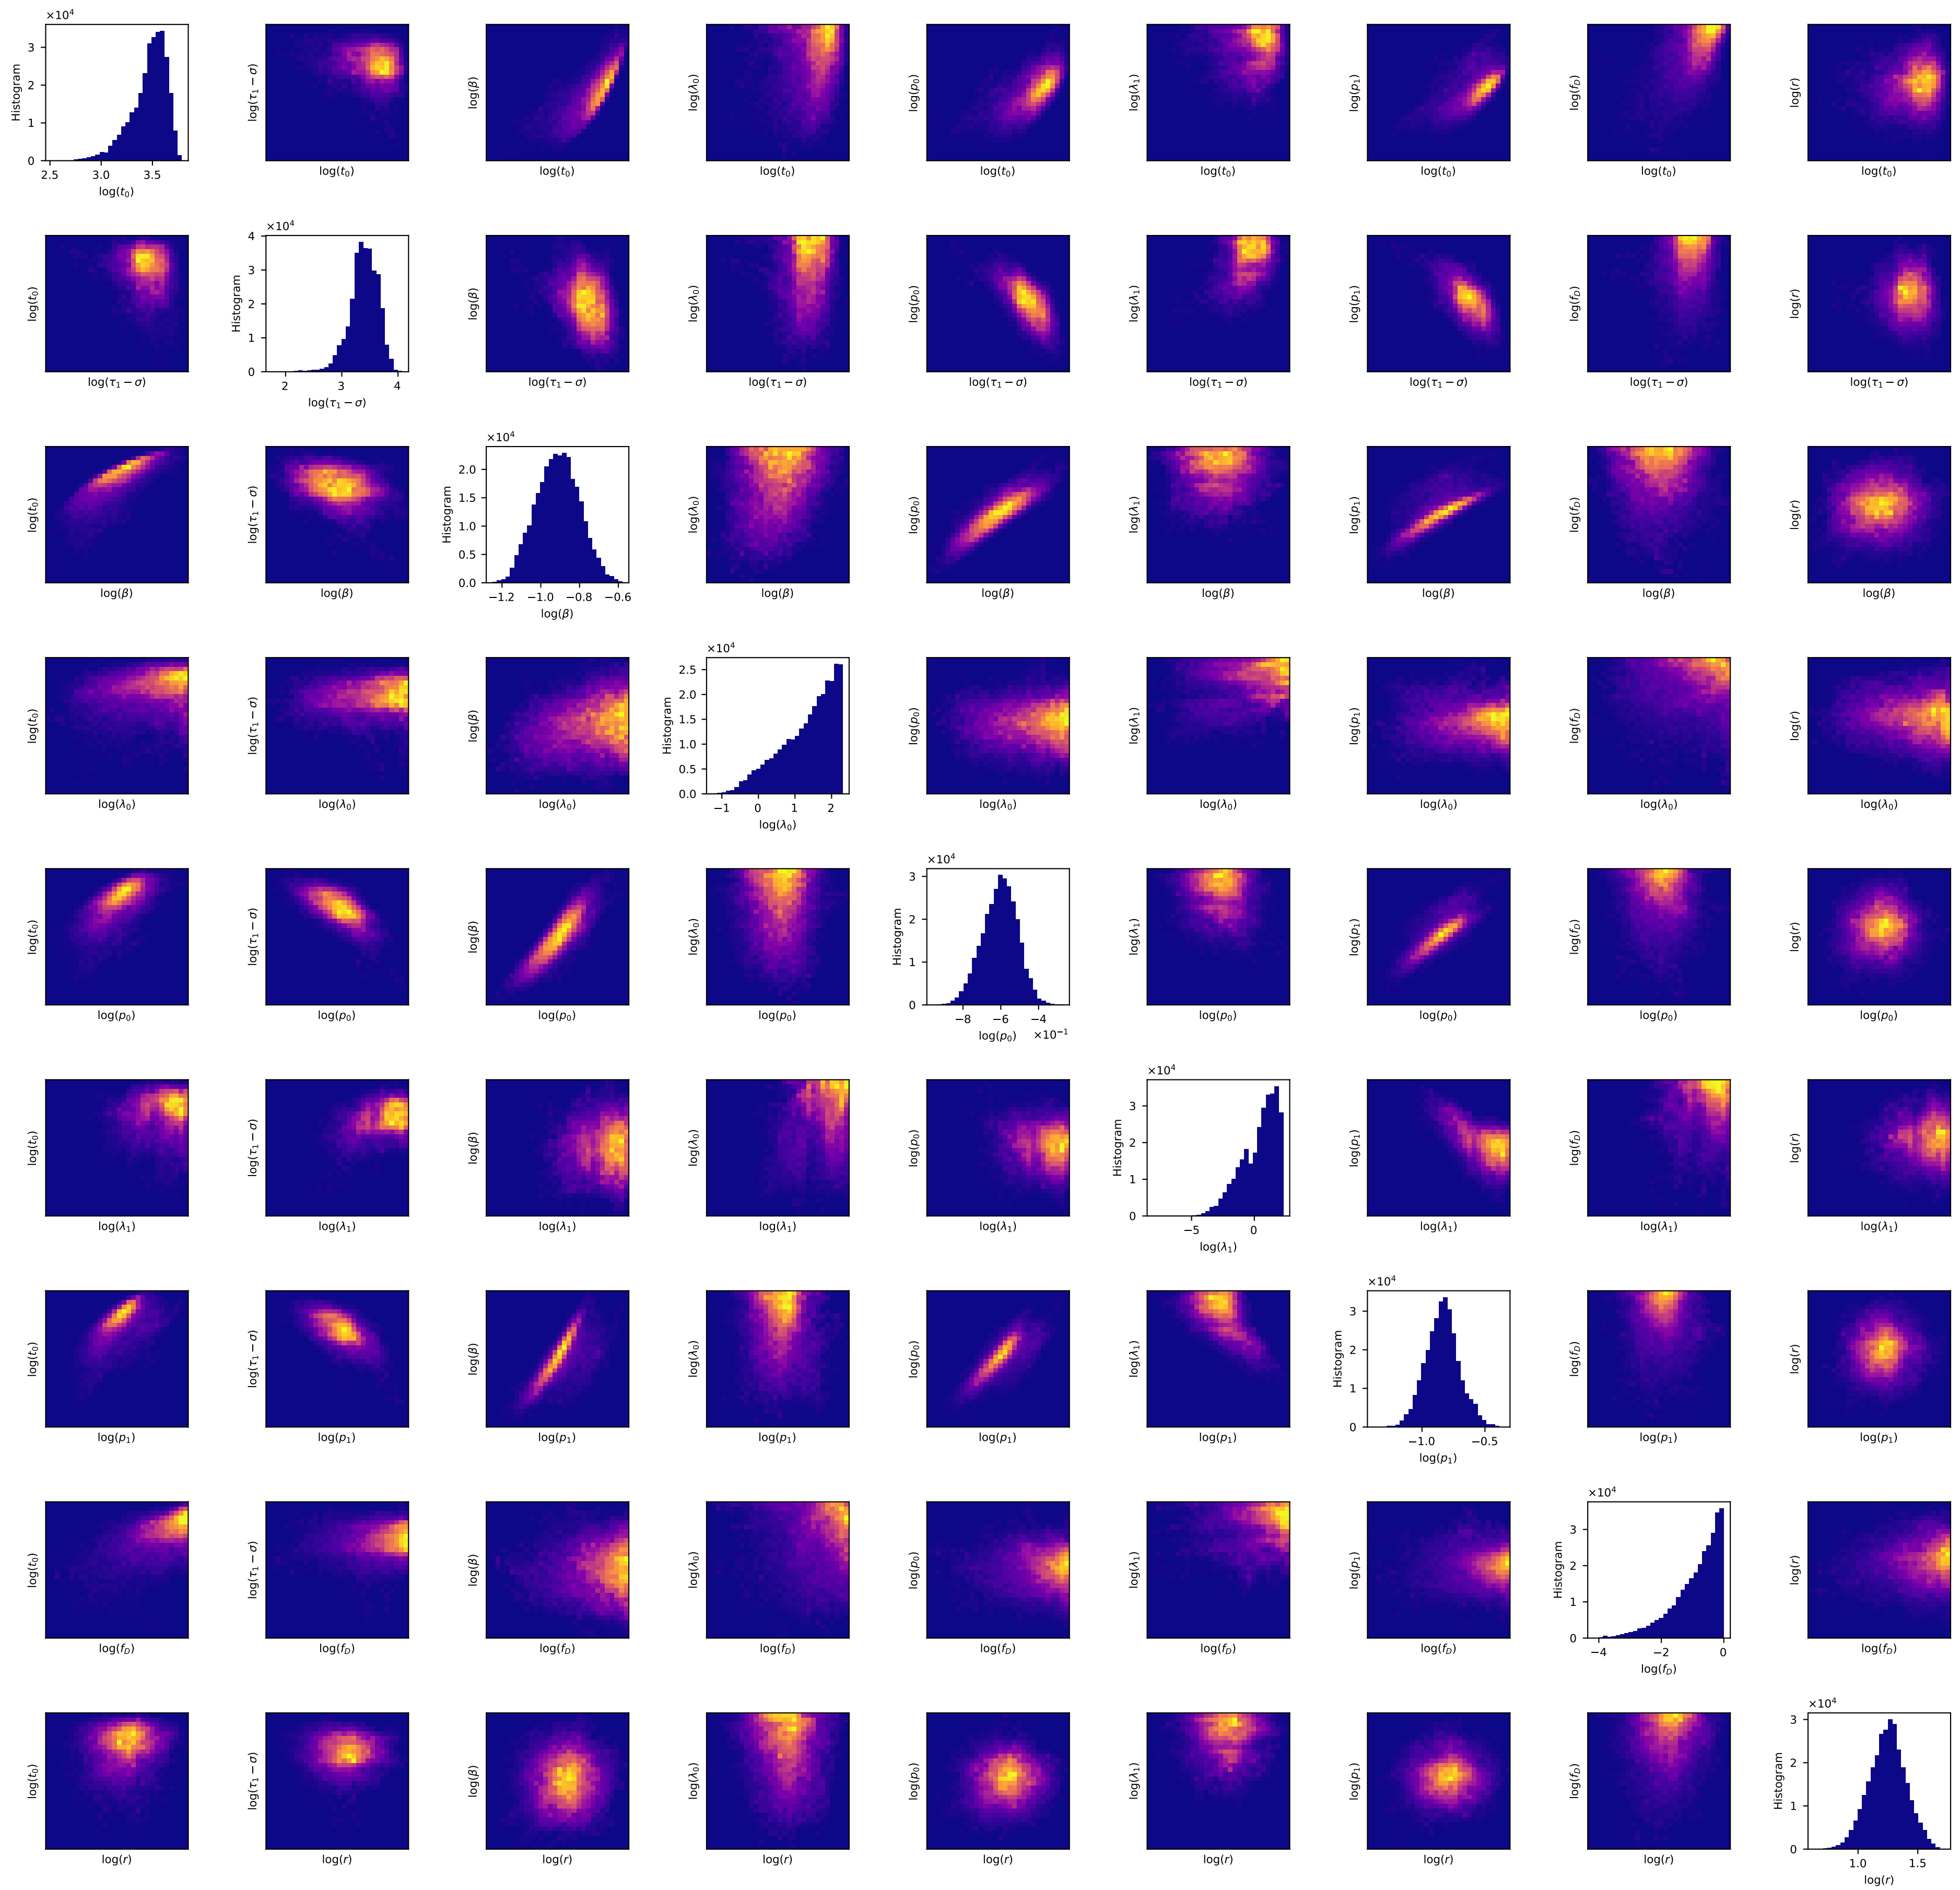

# Illinois

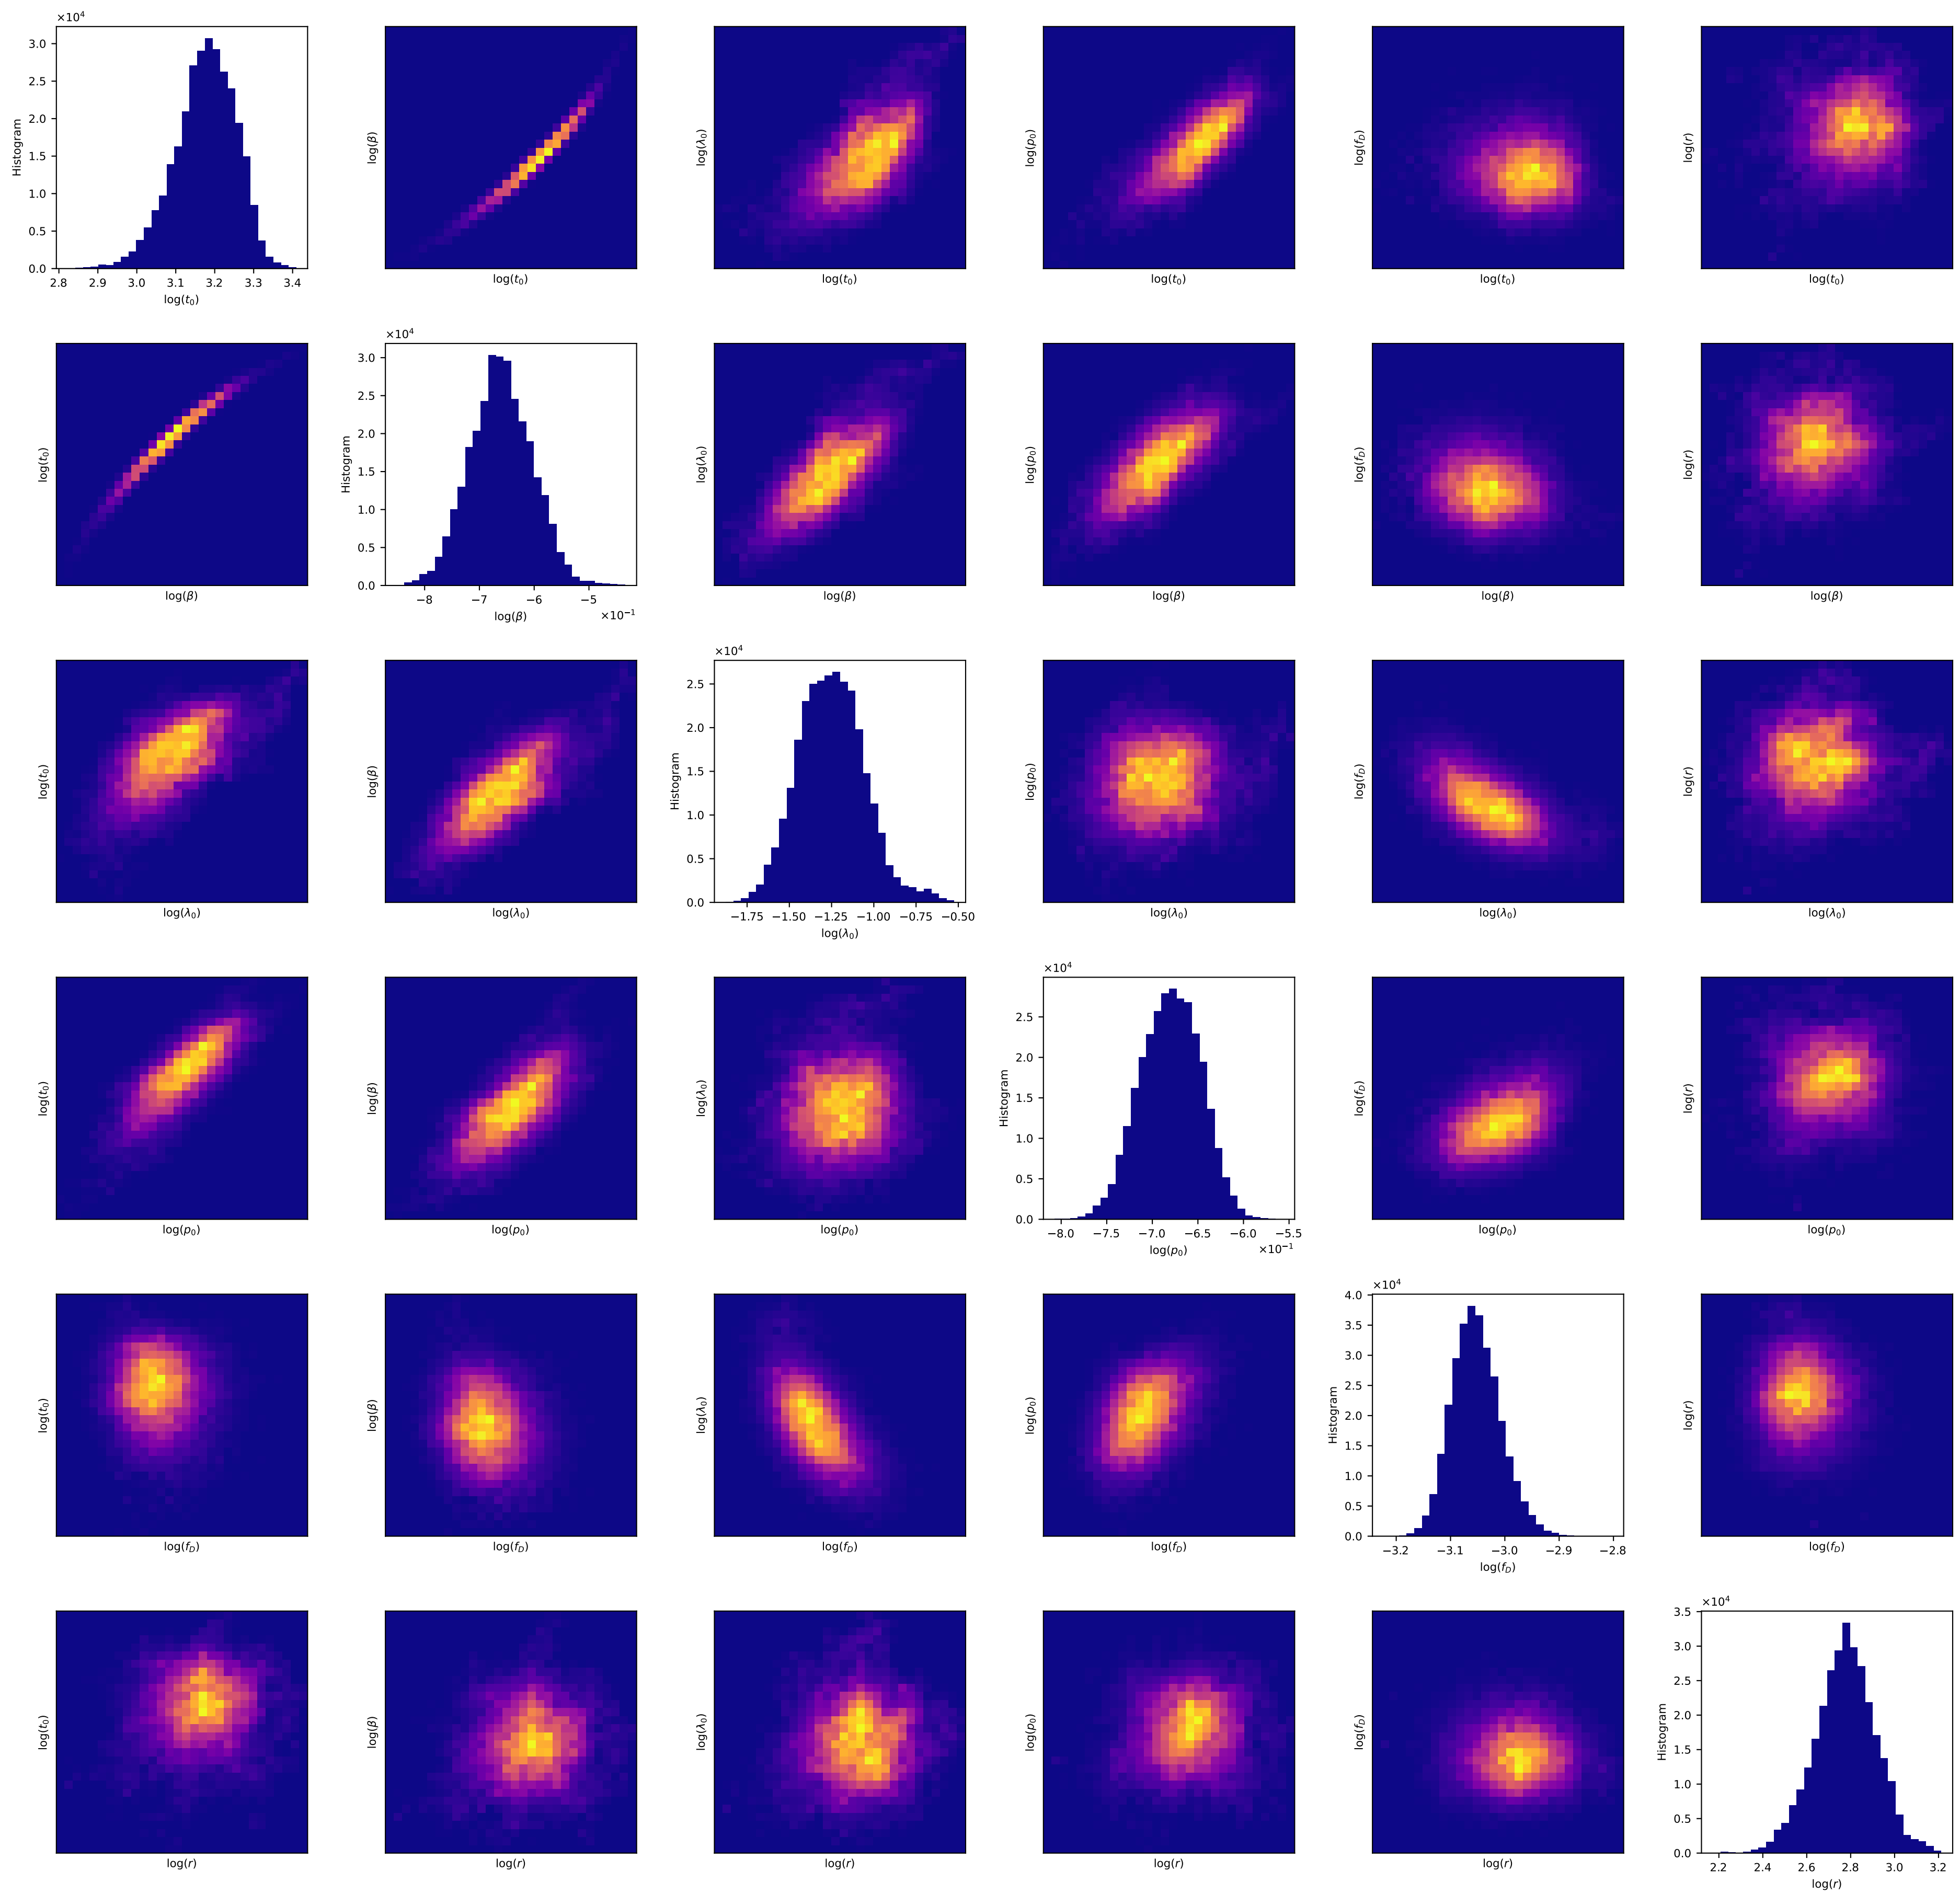

# Indiana

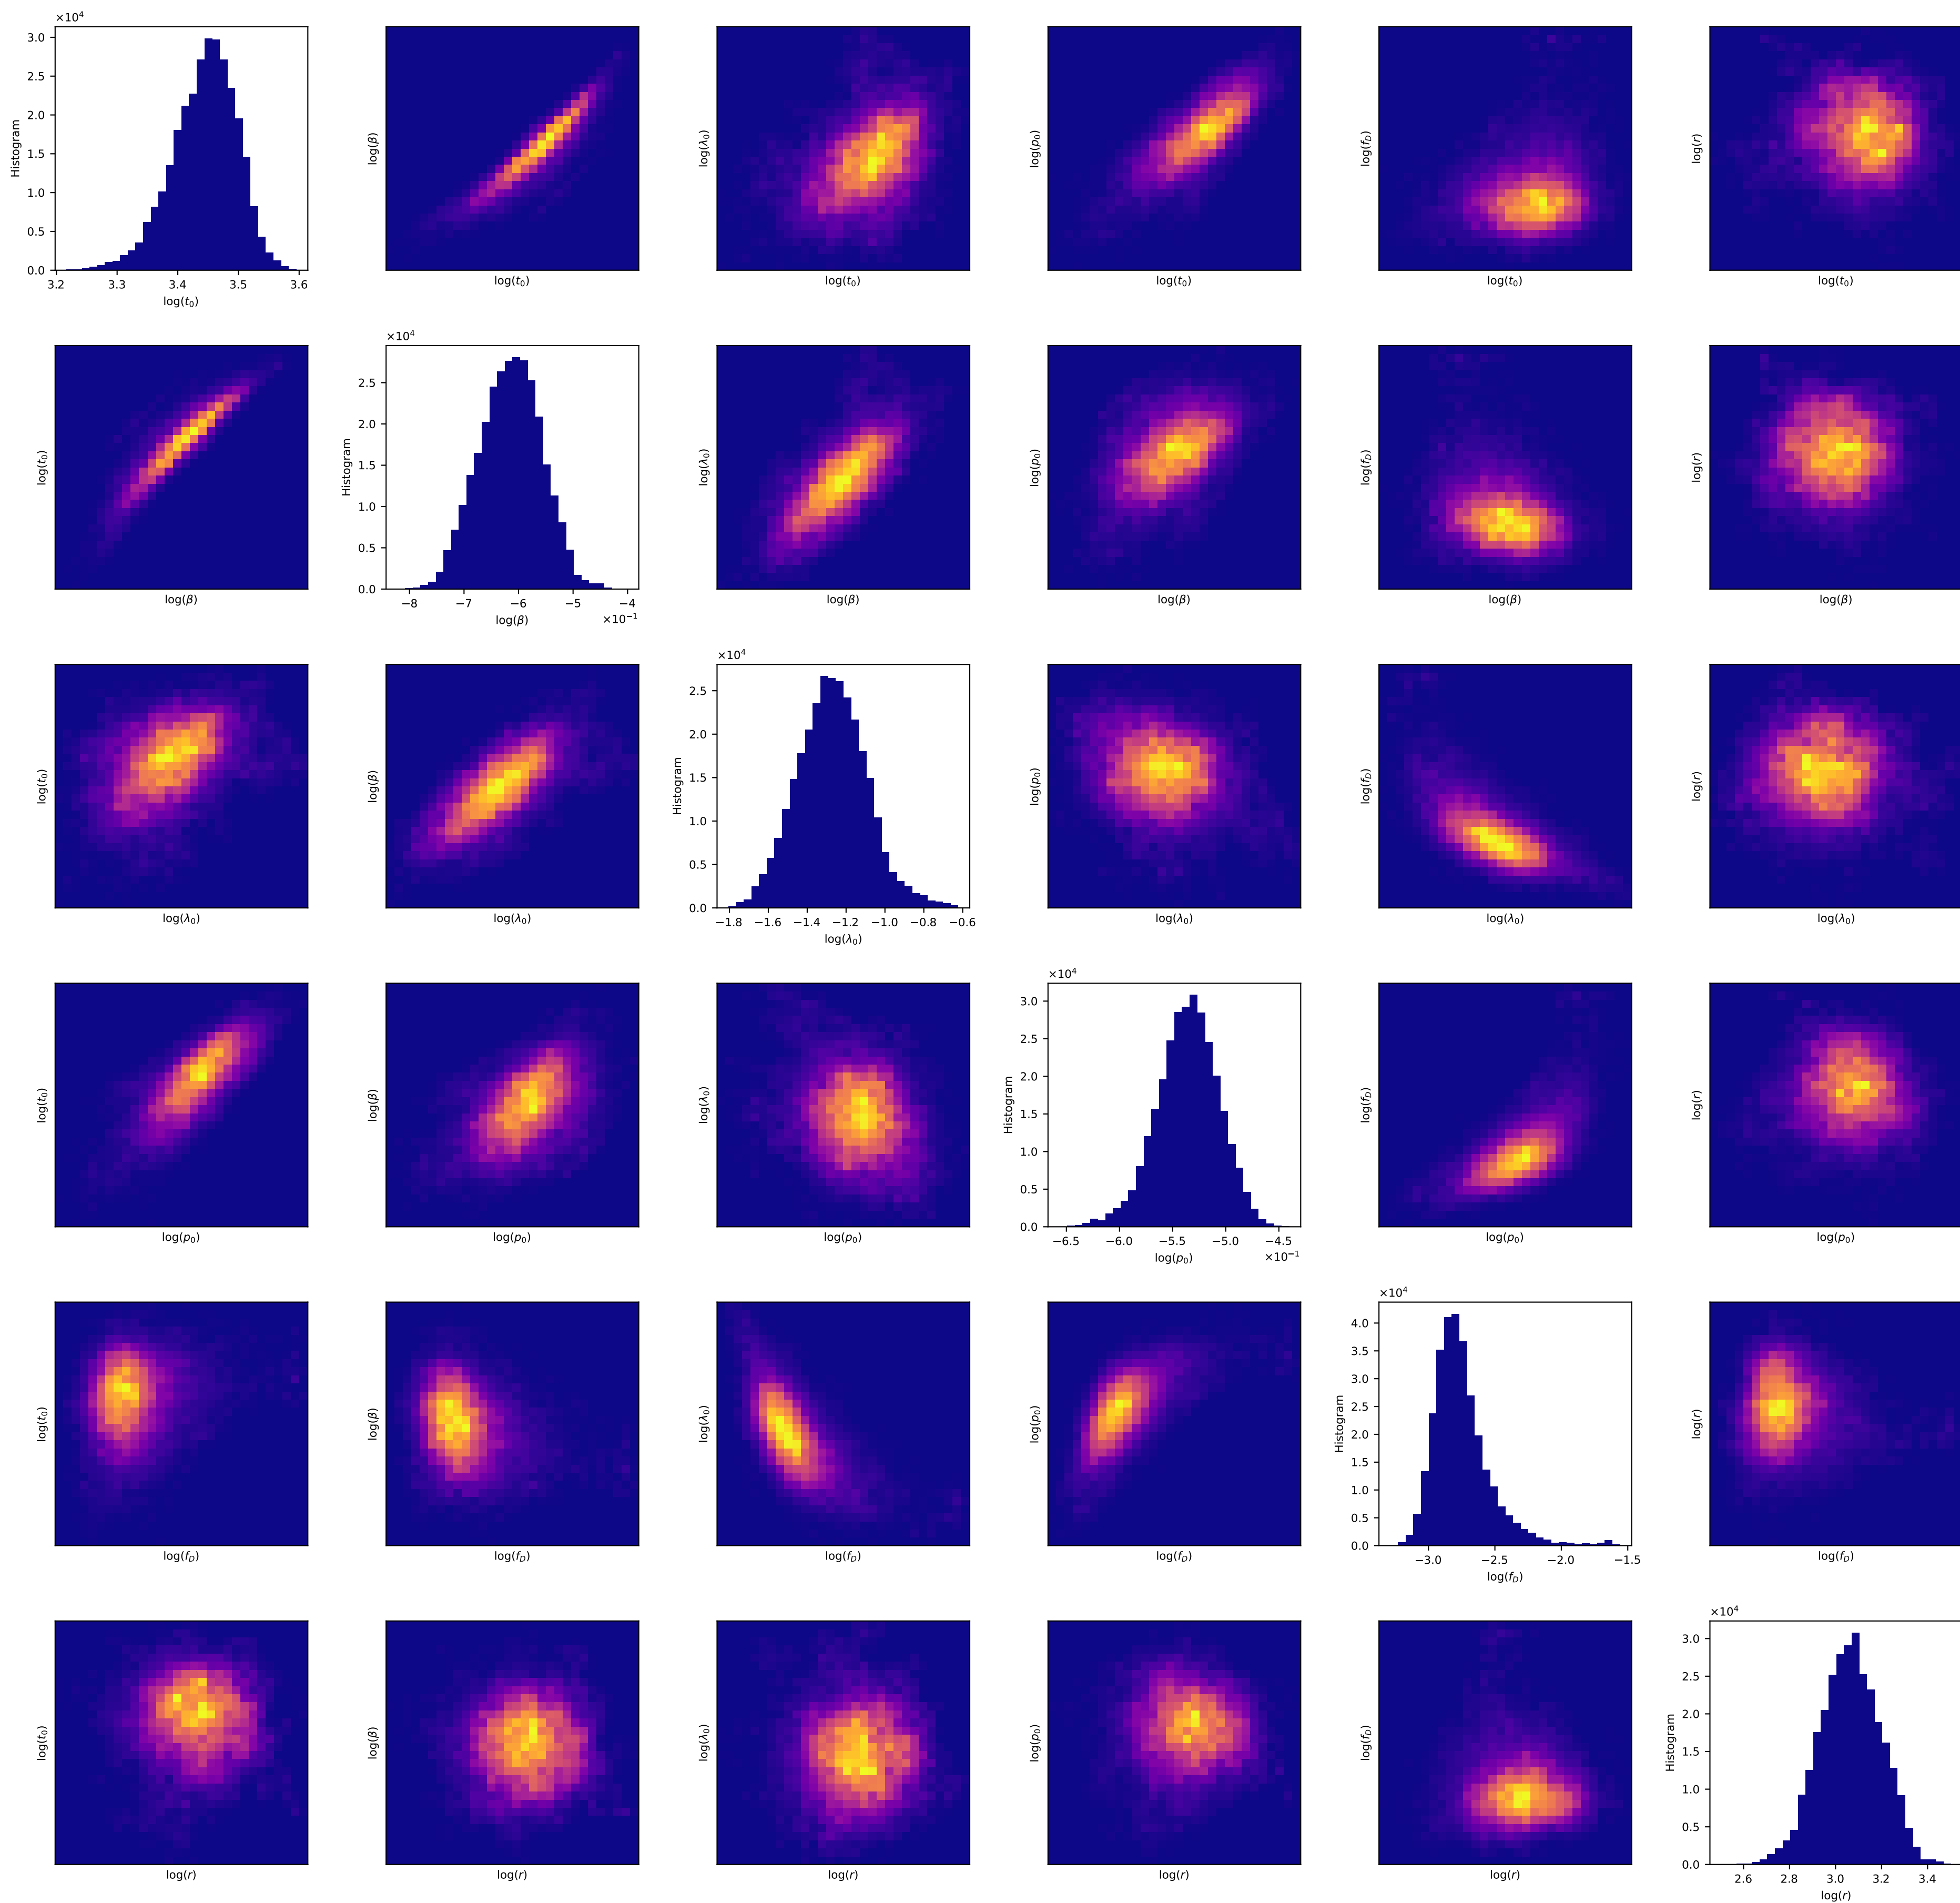

## Iowa

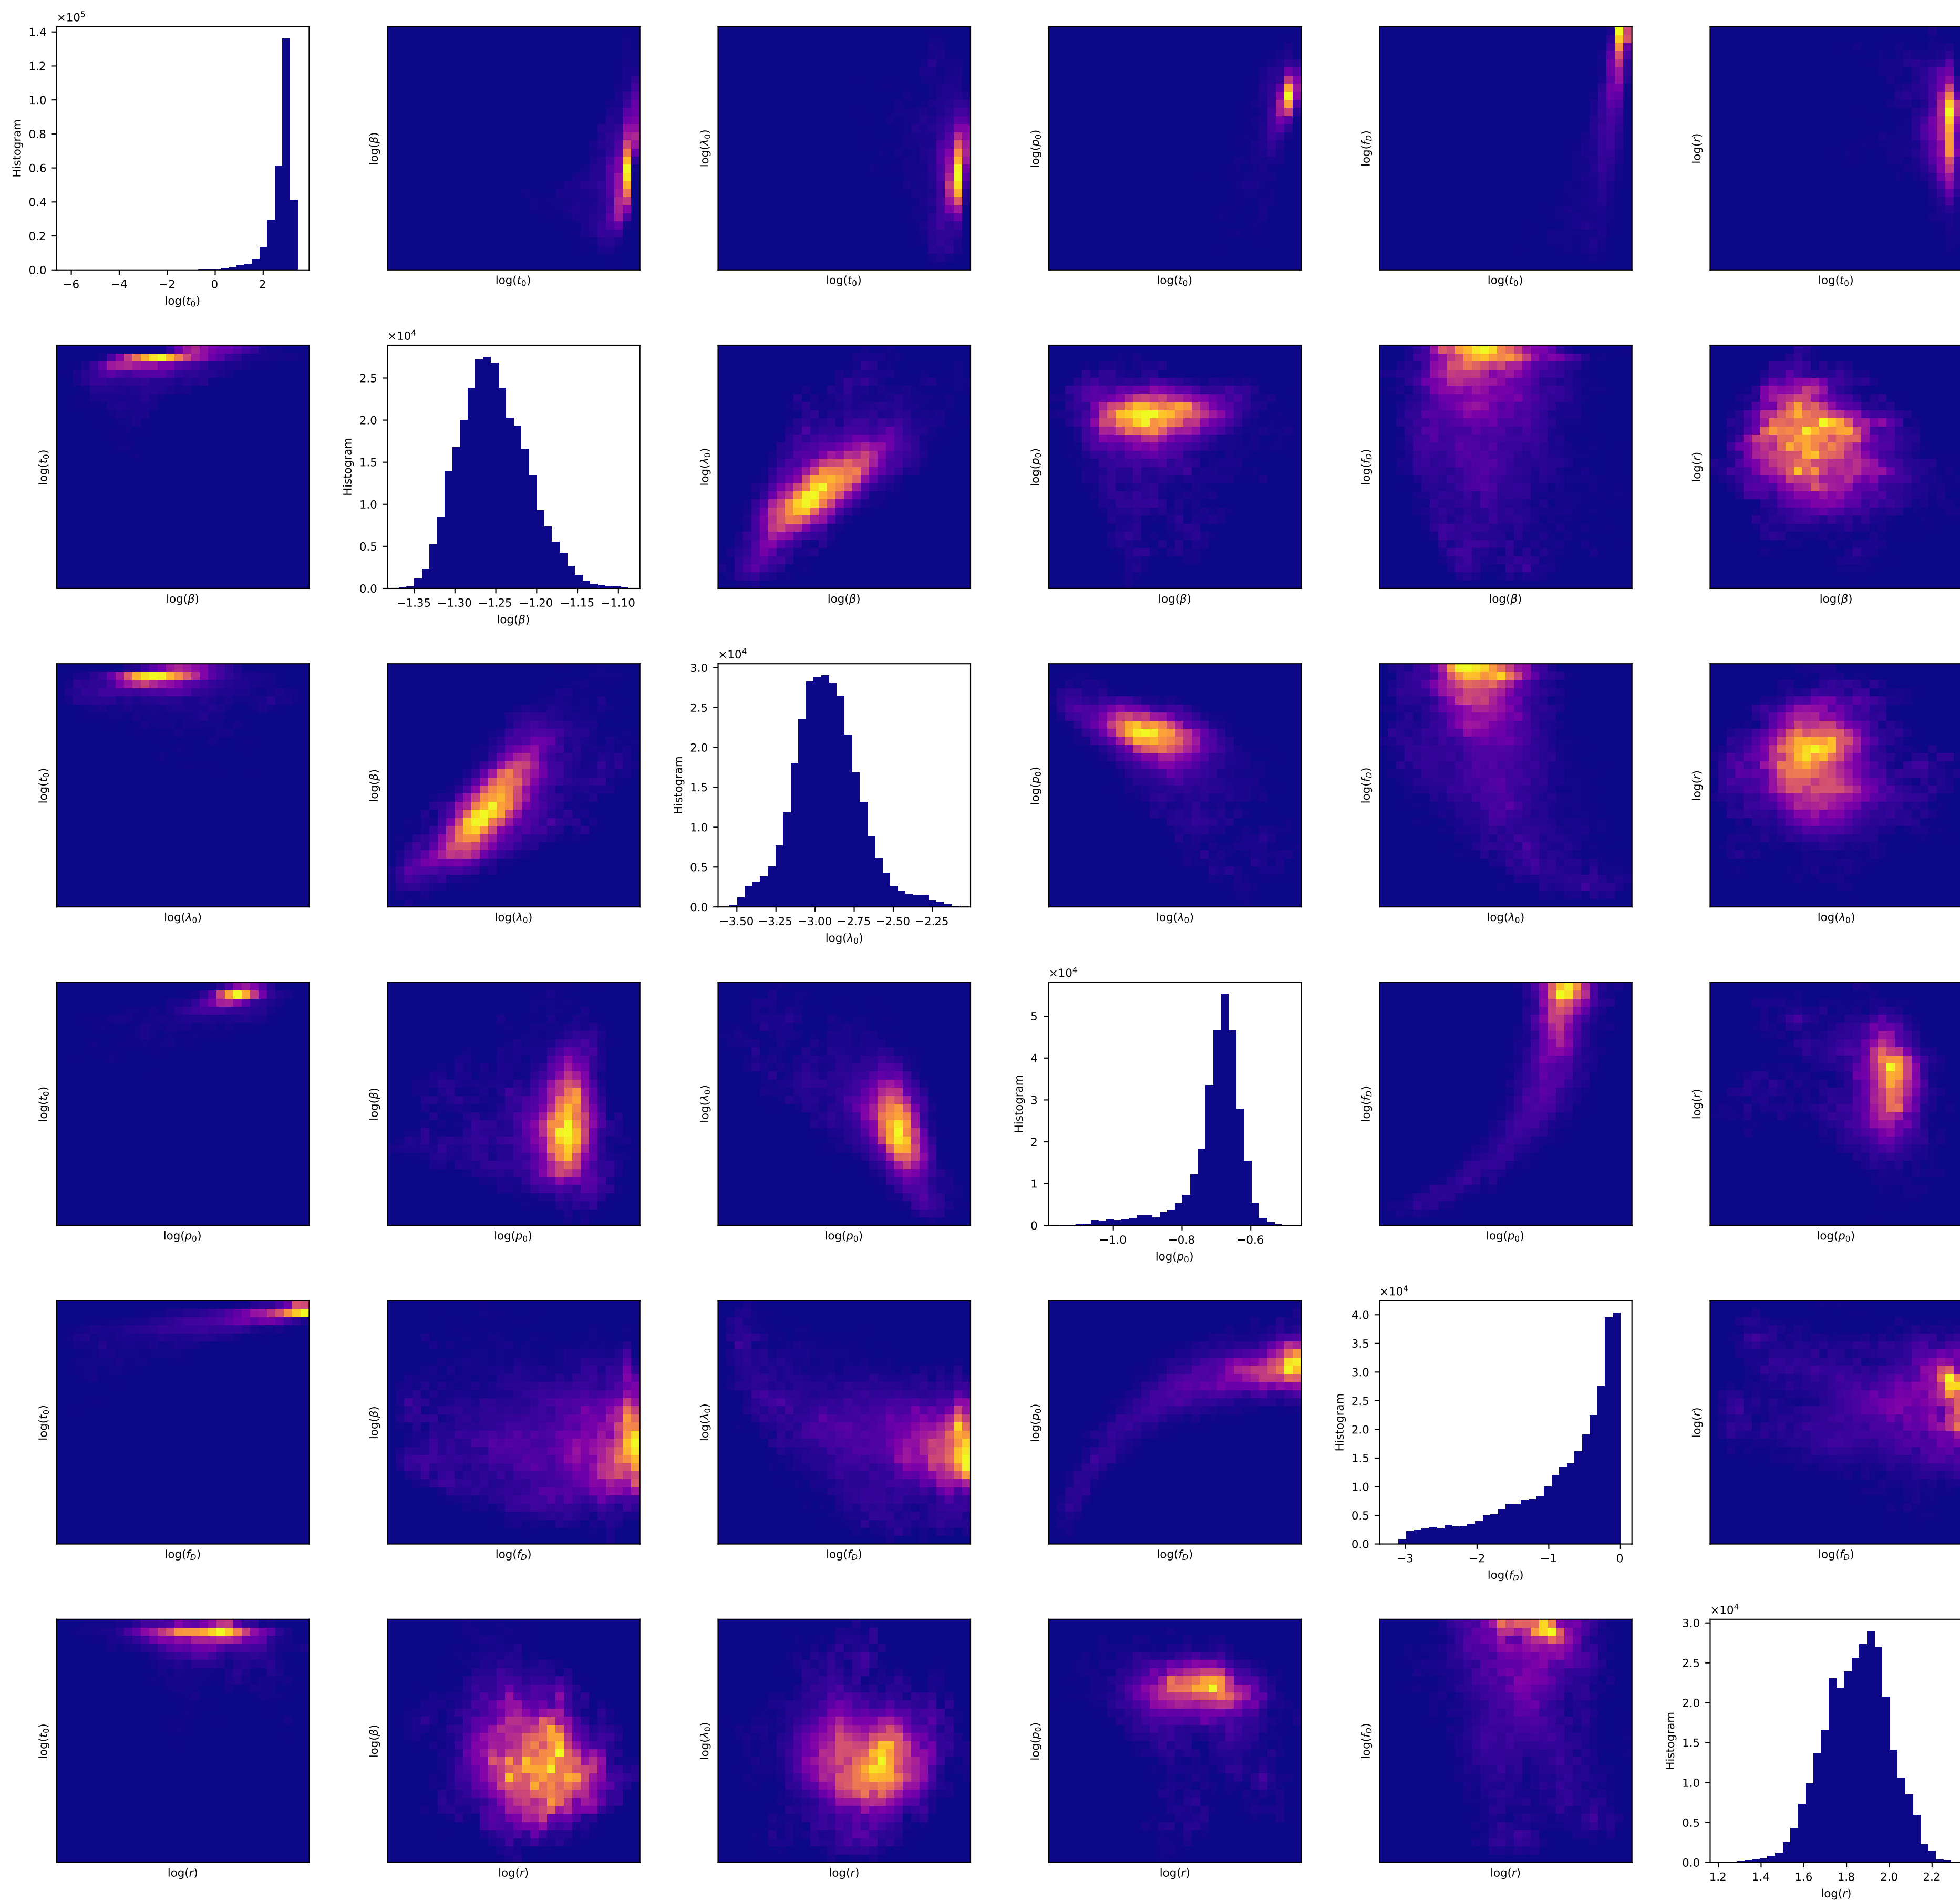

# Kansas

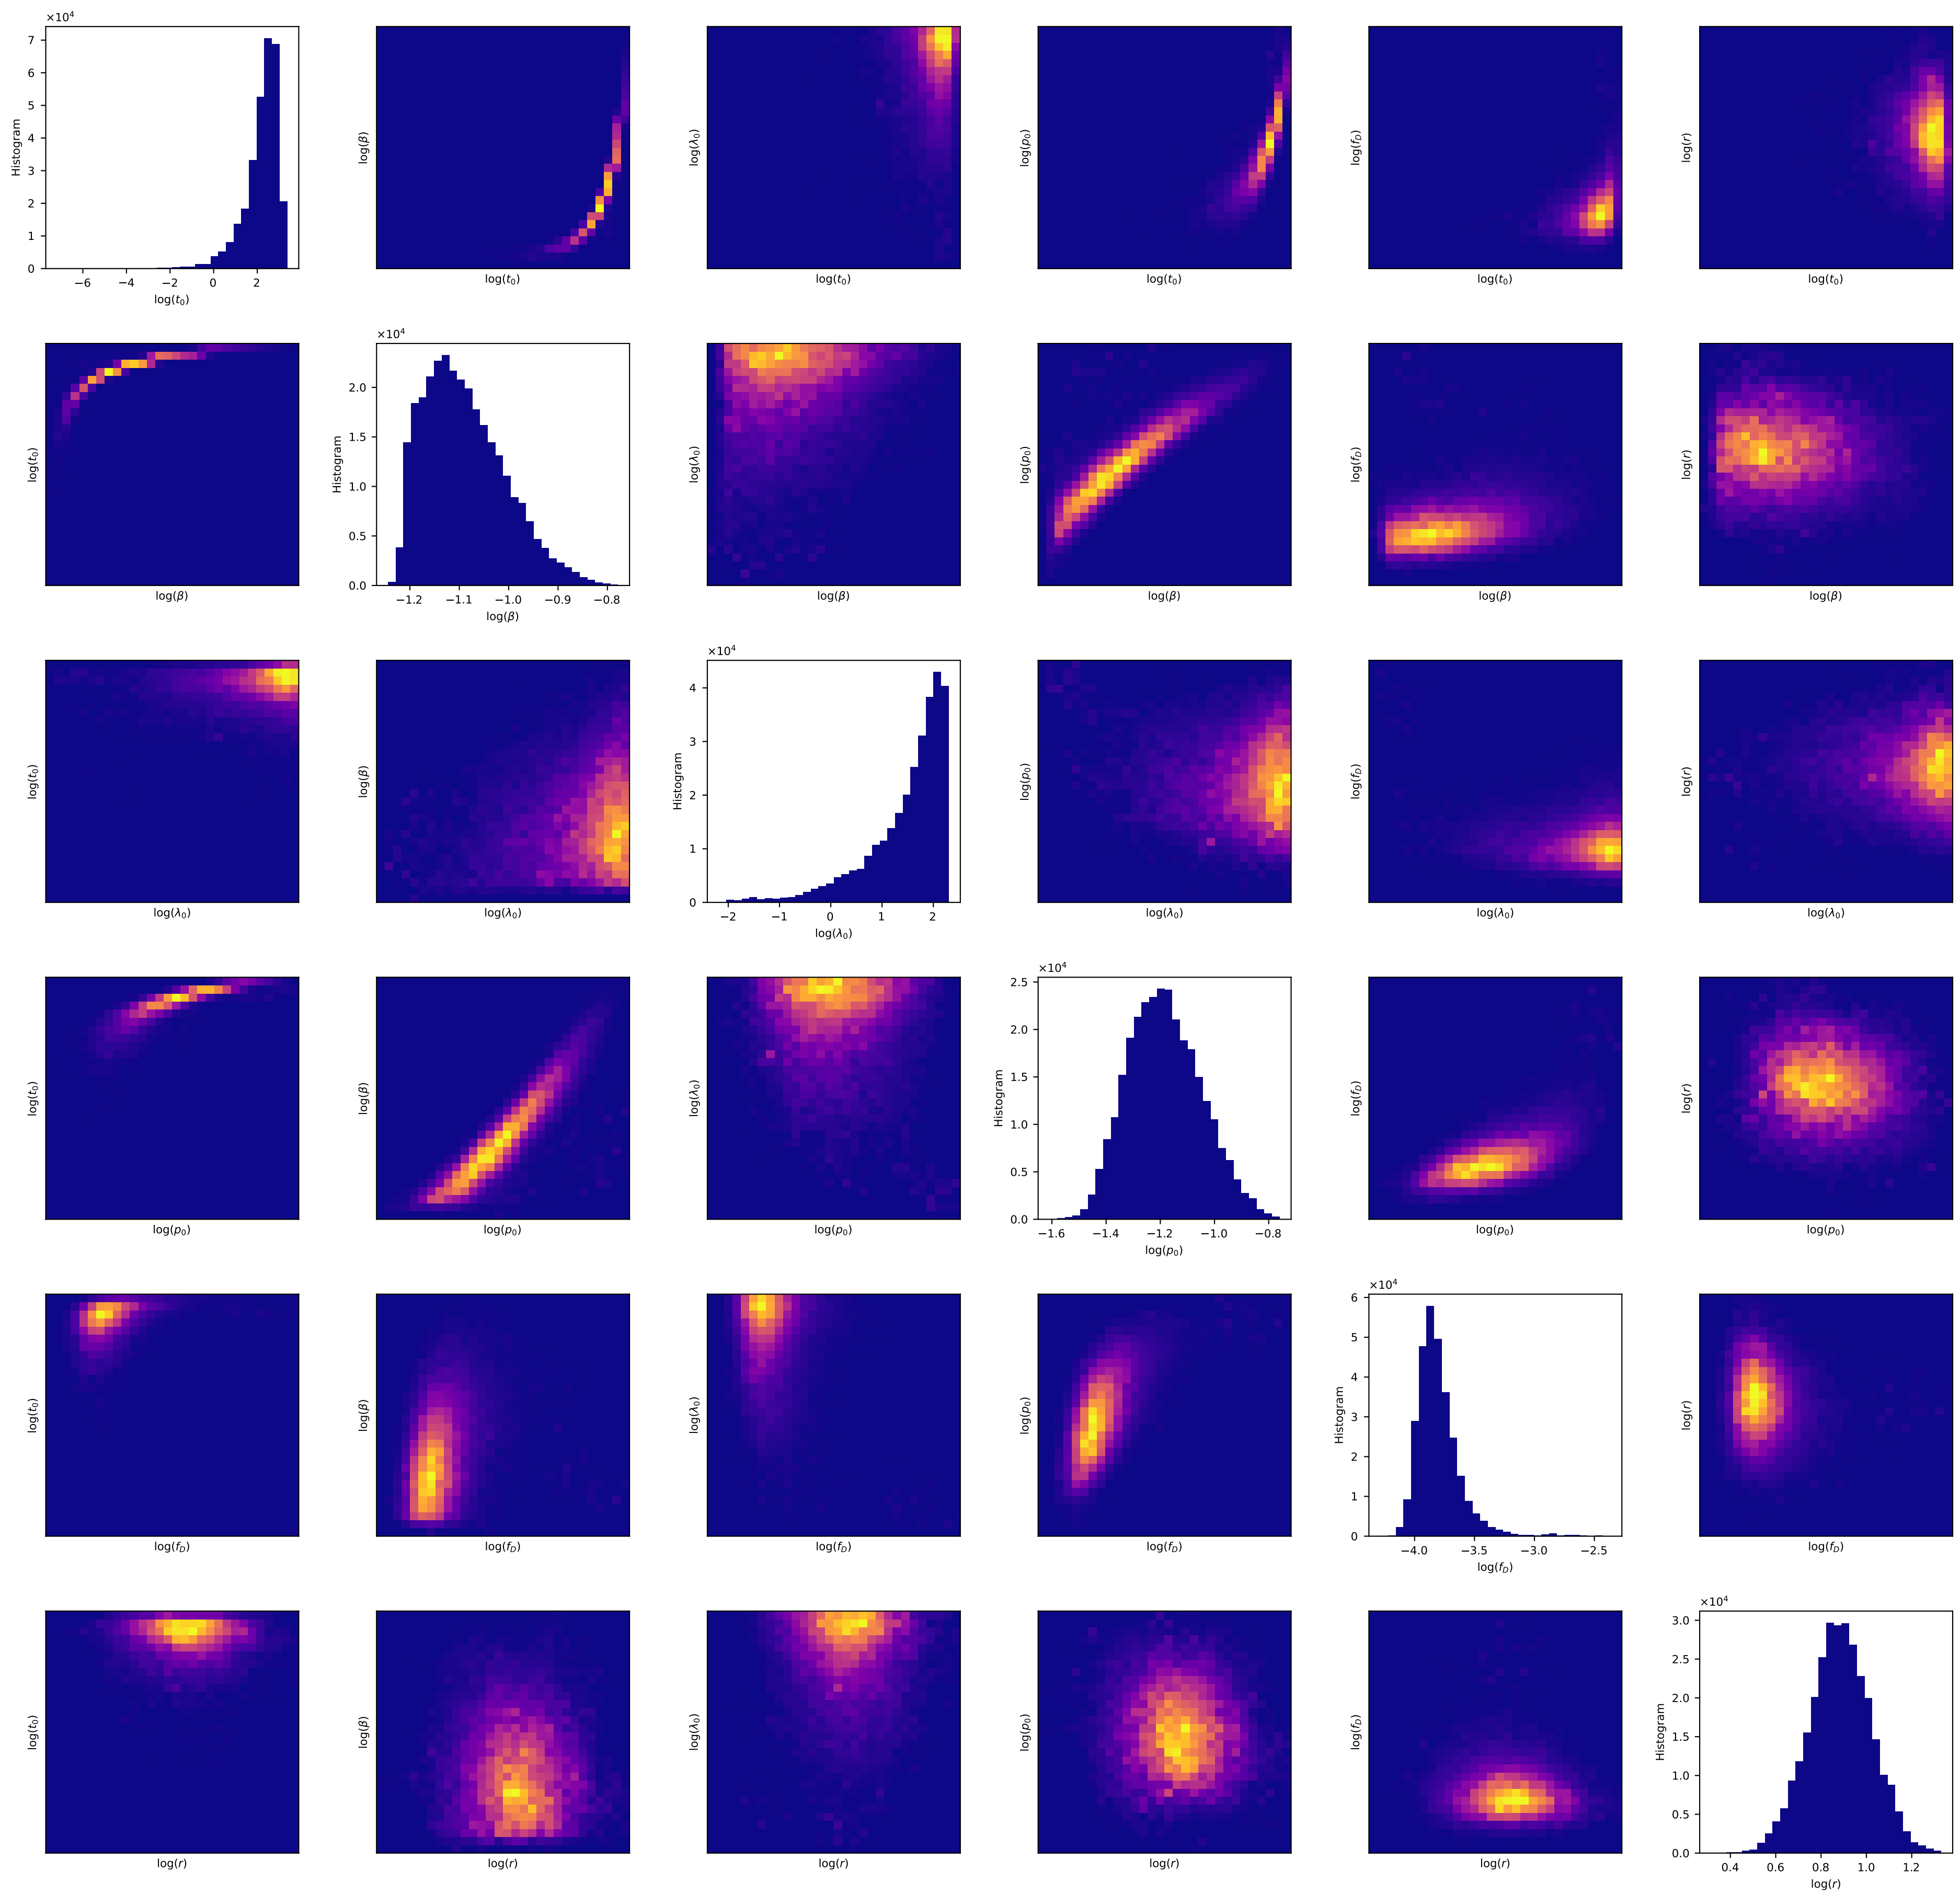

# Kentucky

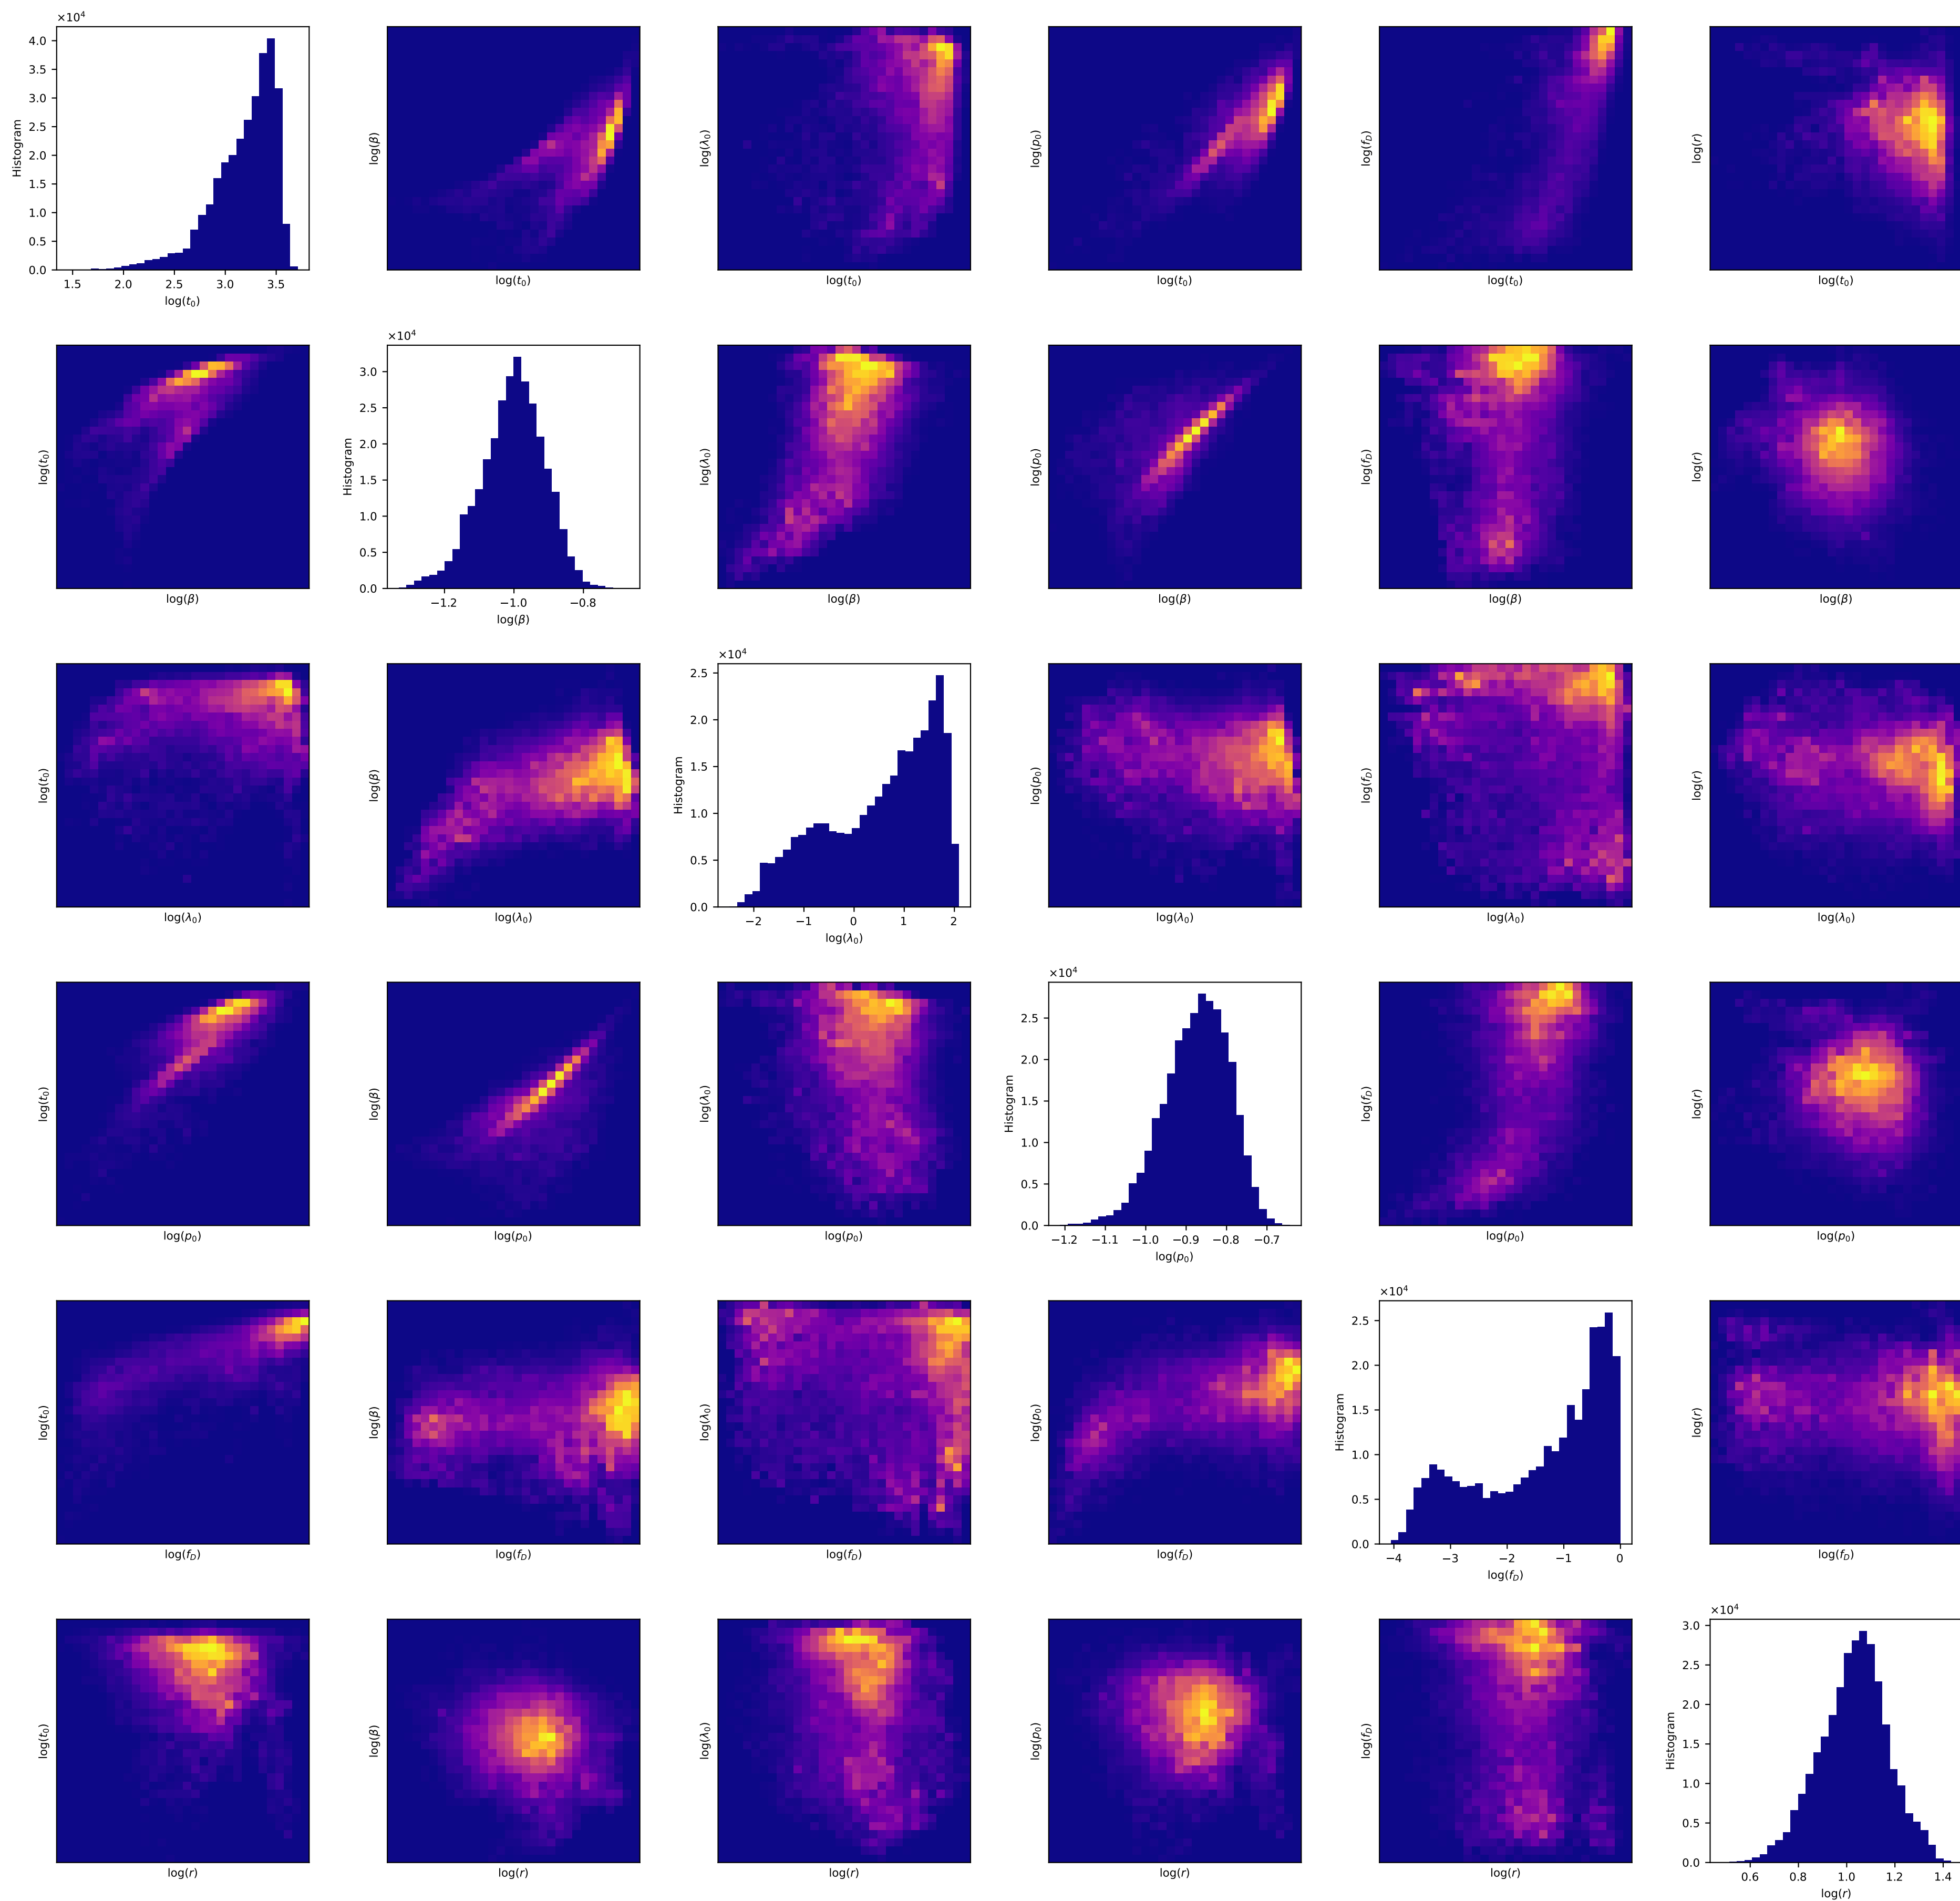

# Louisiana

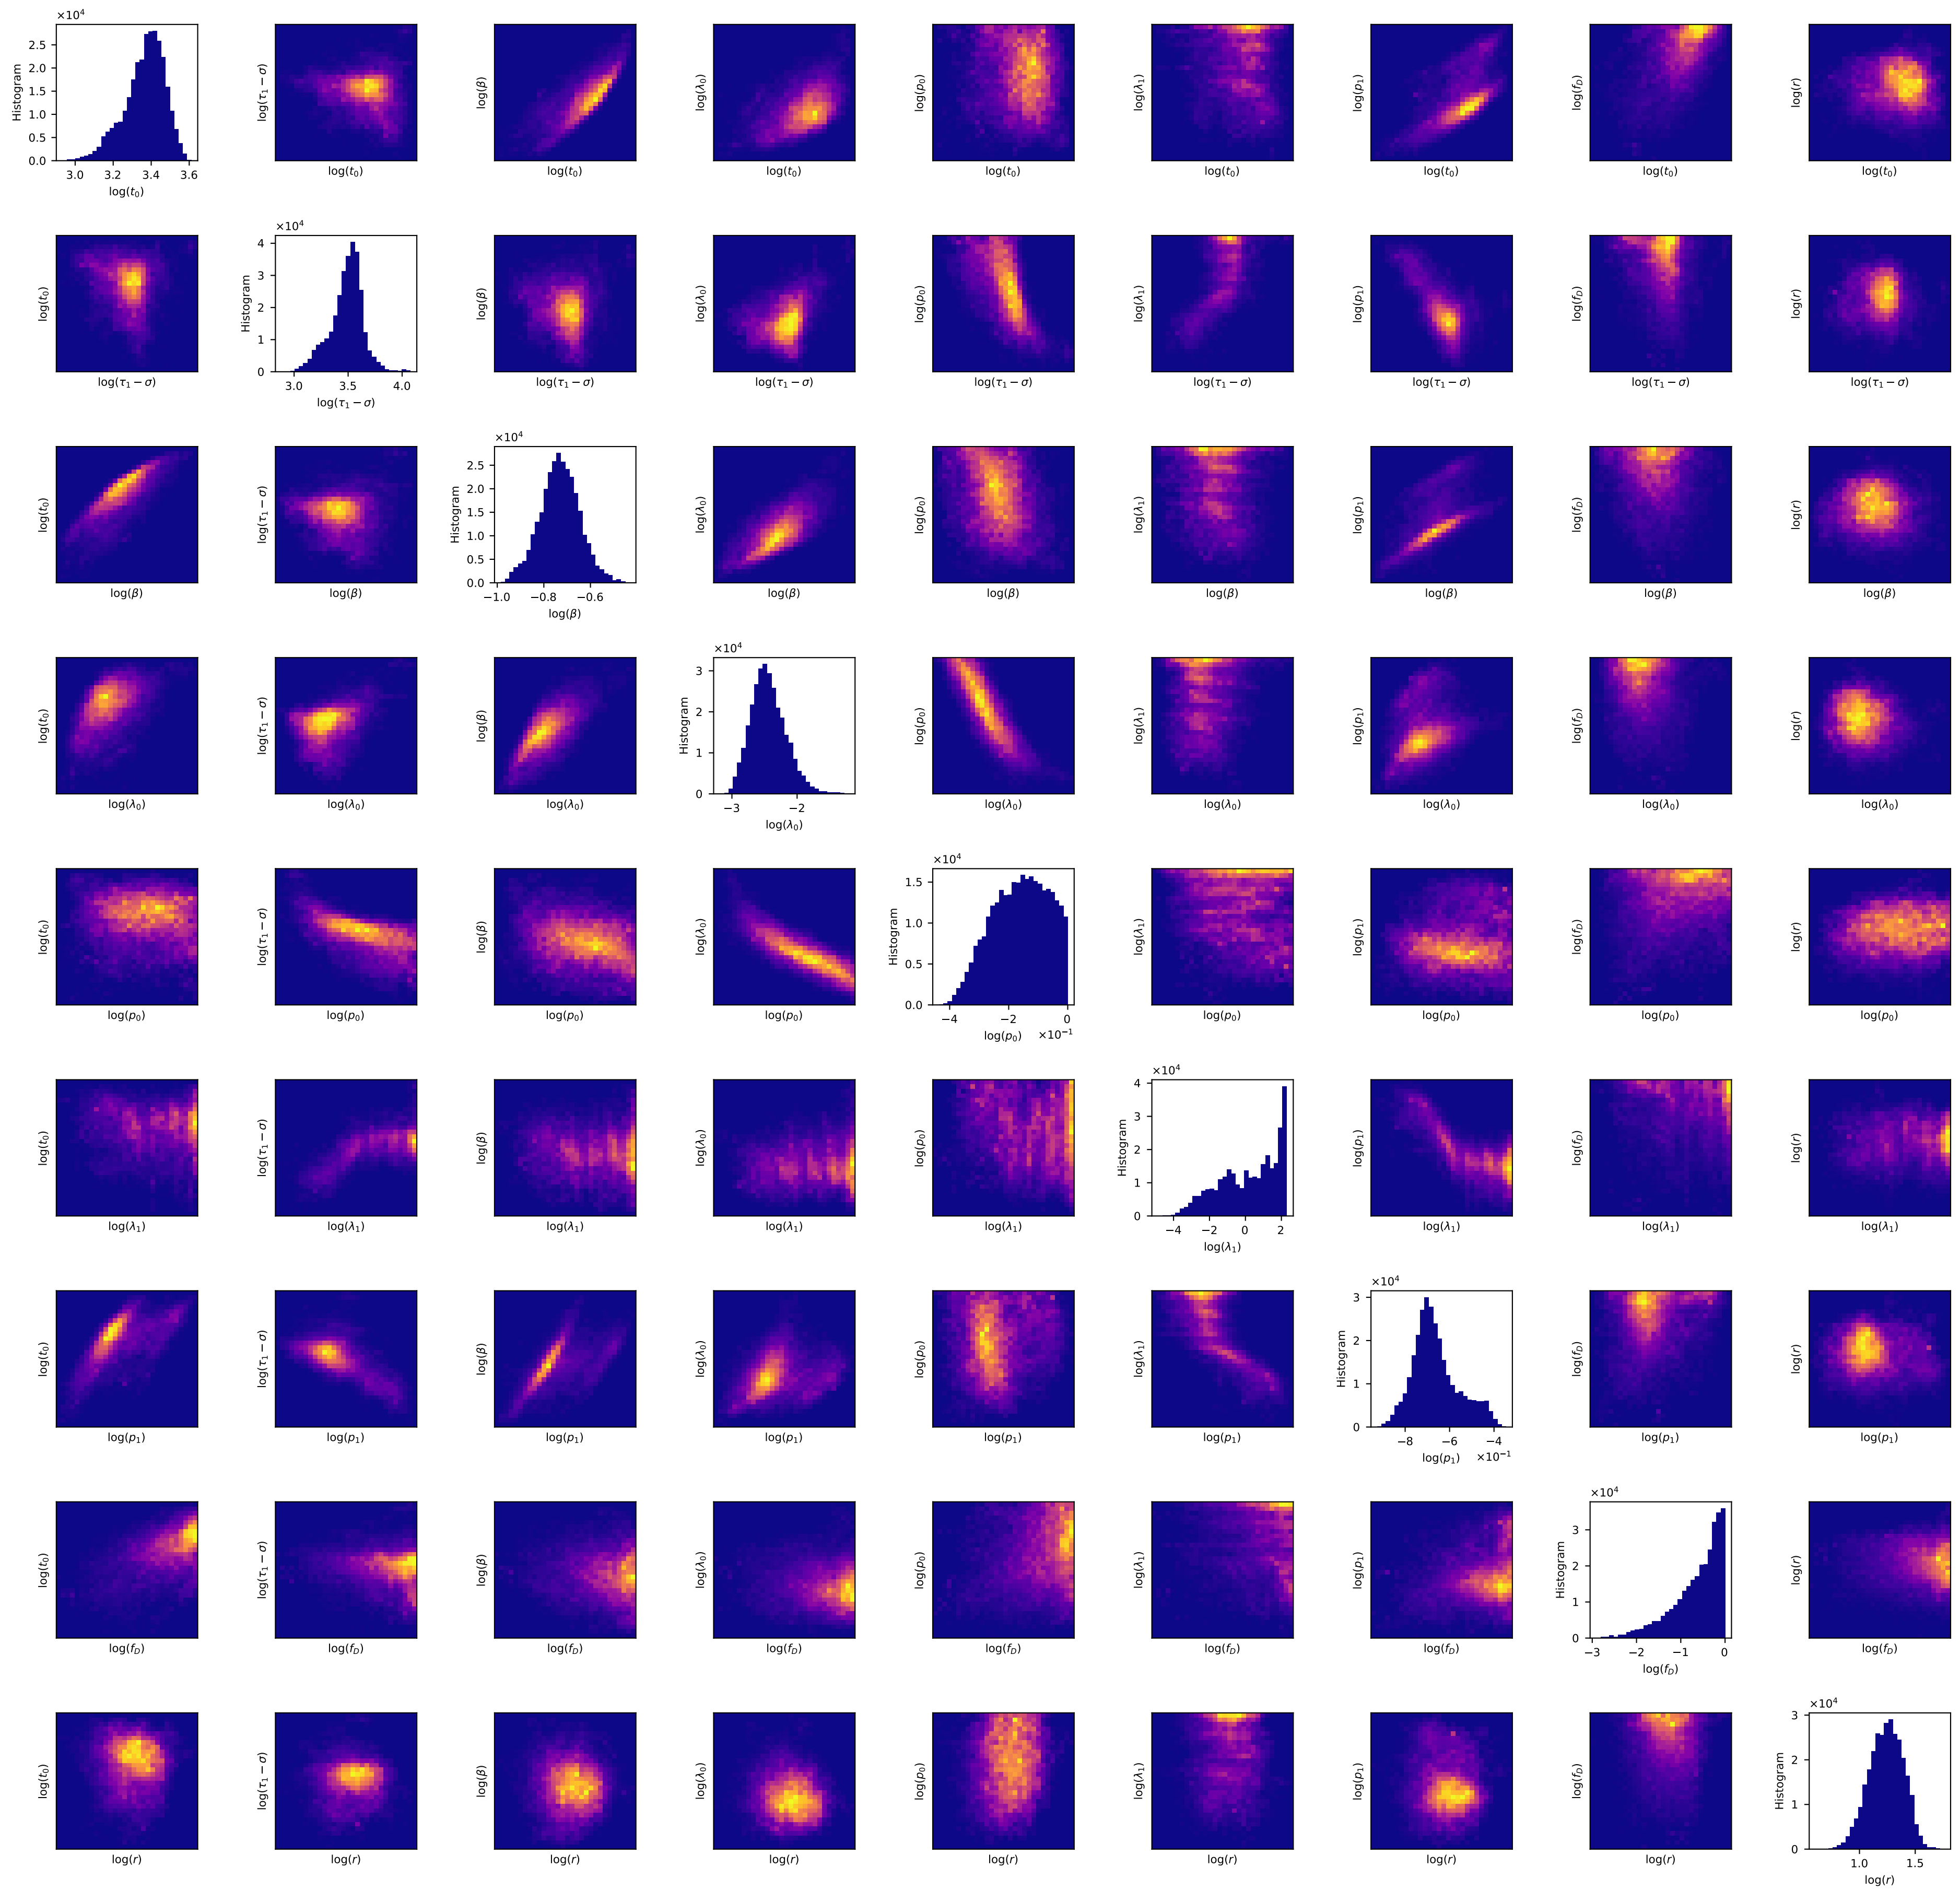



# Maine

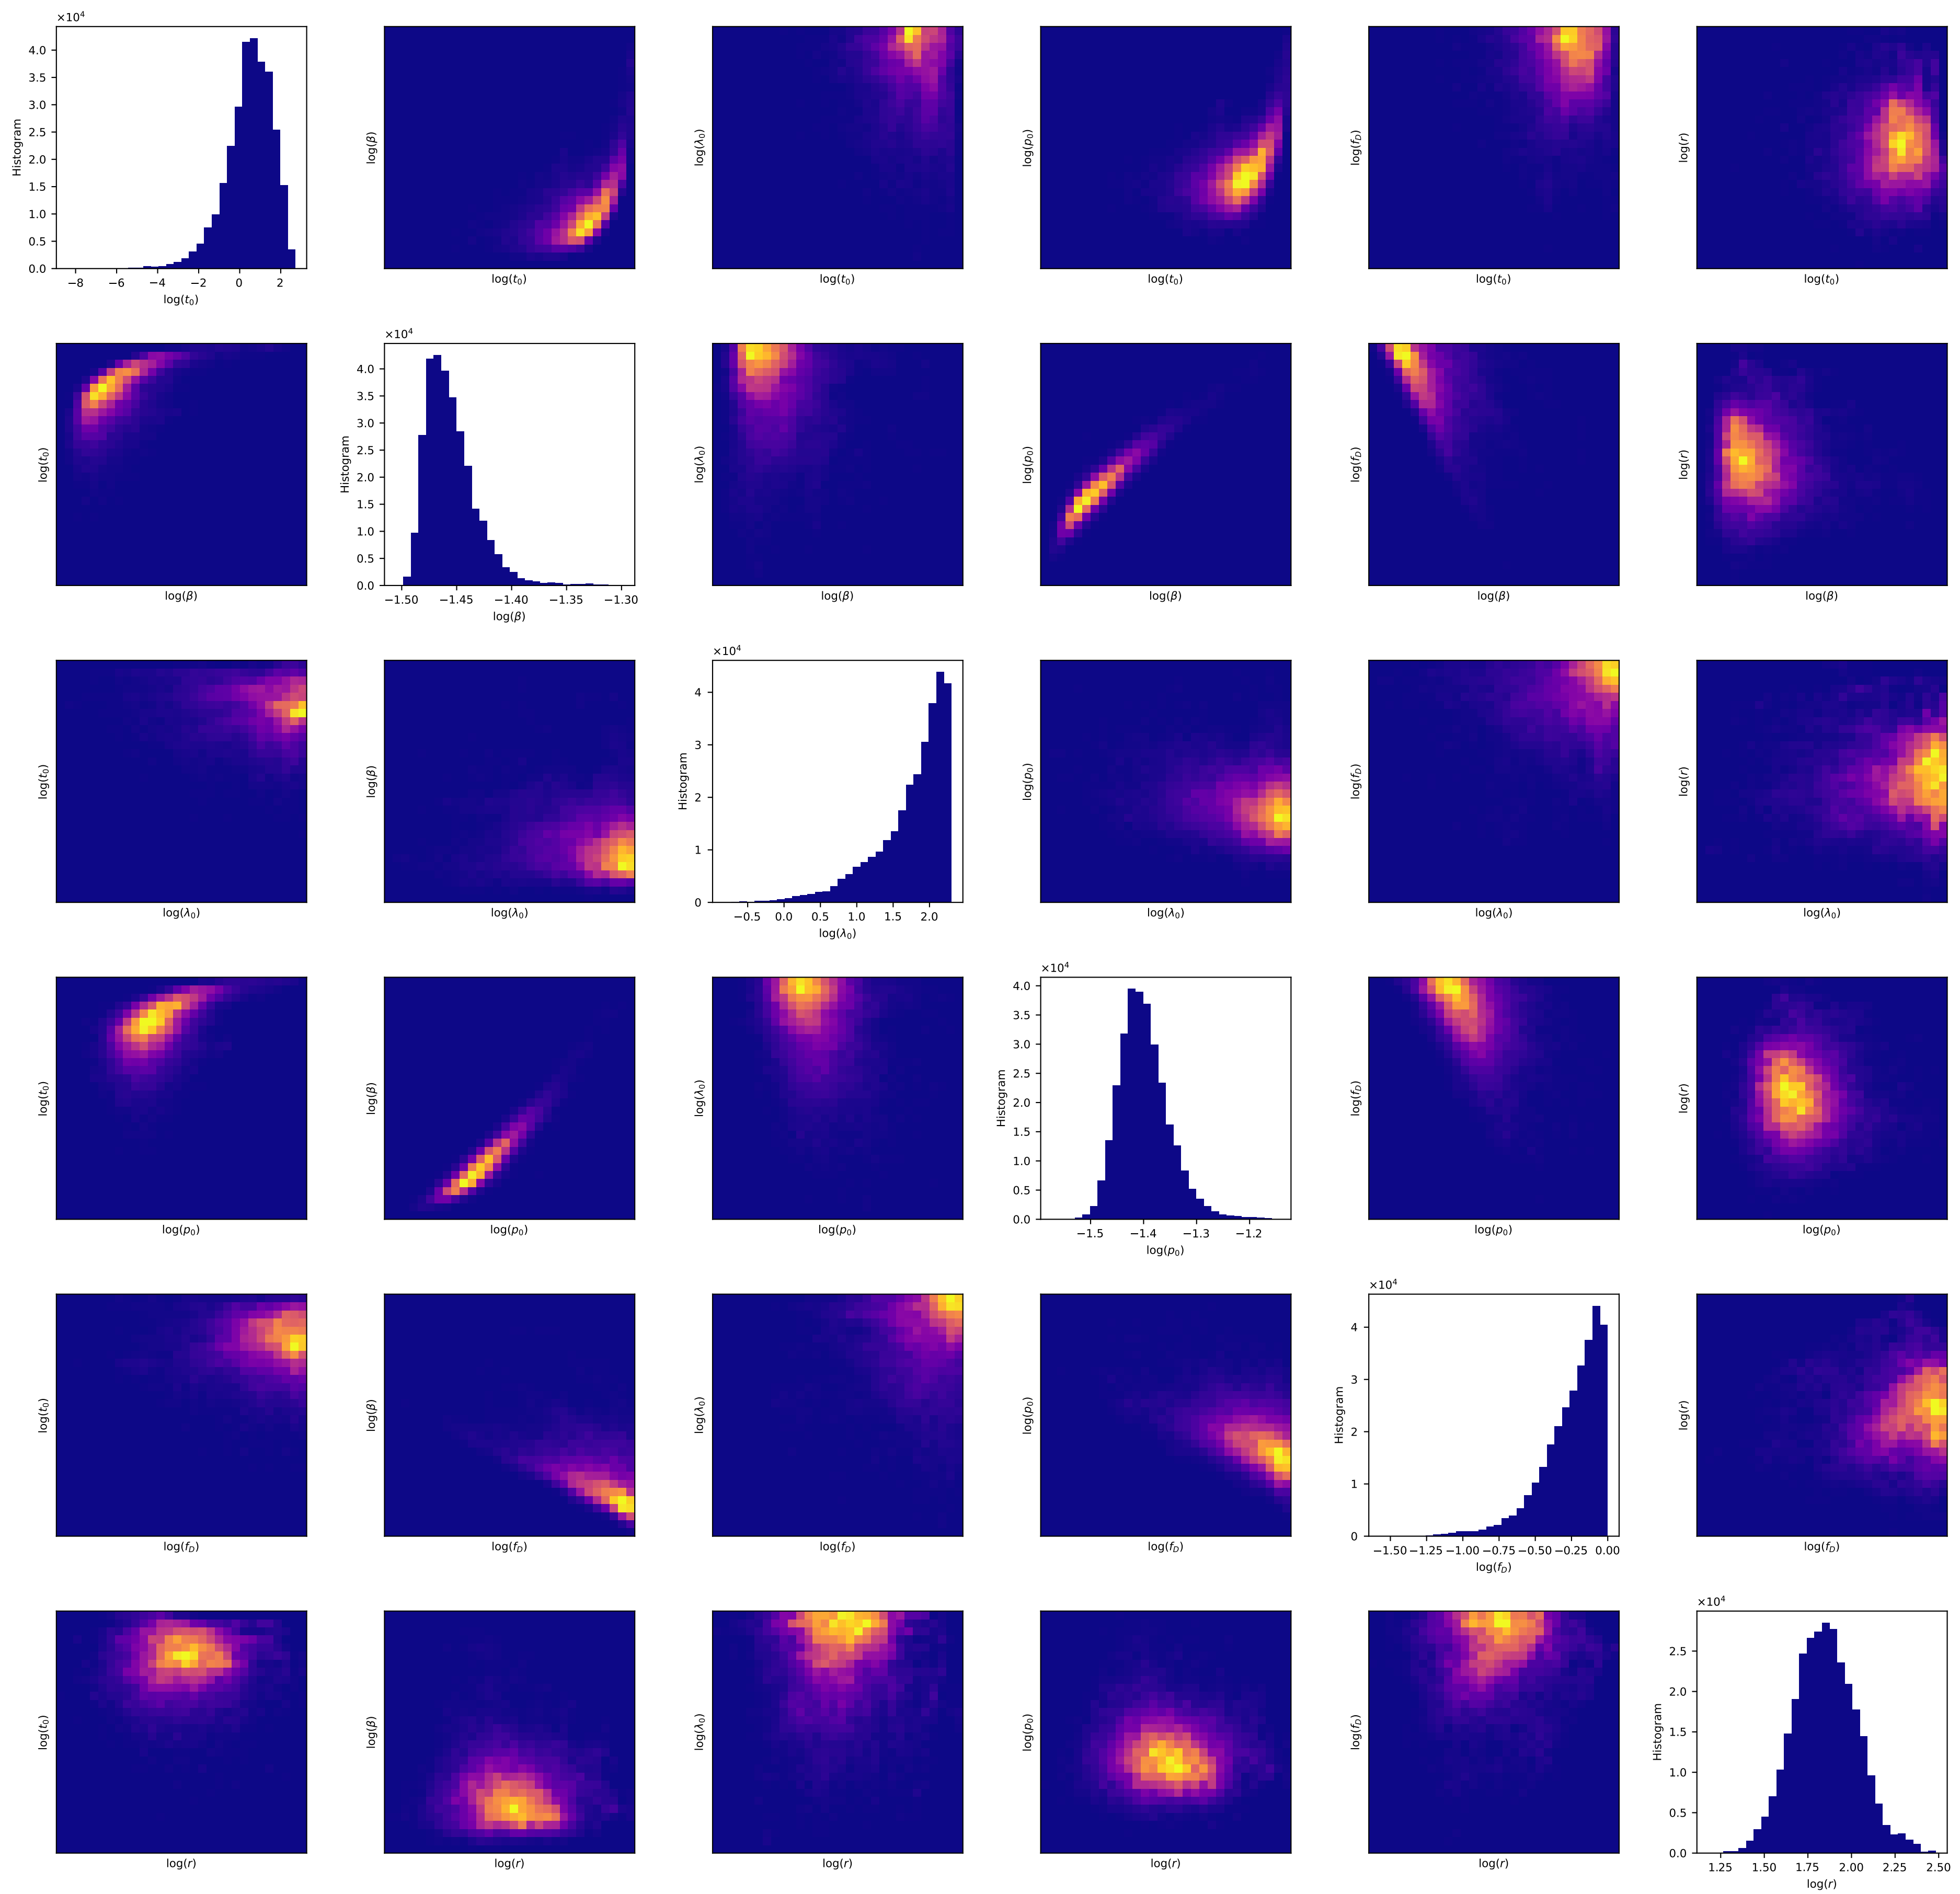

# Maryland

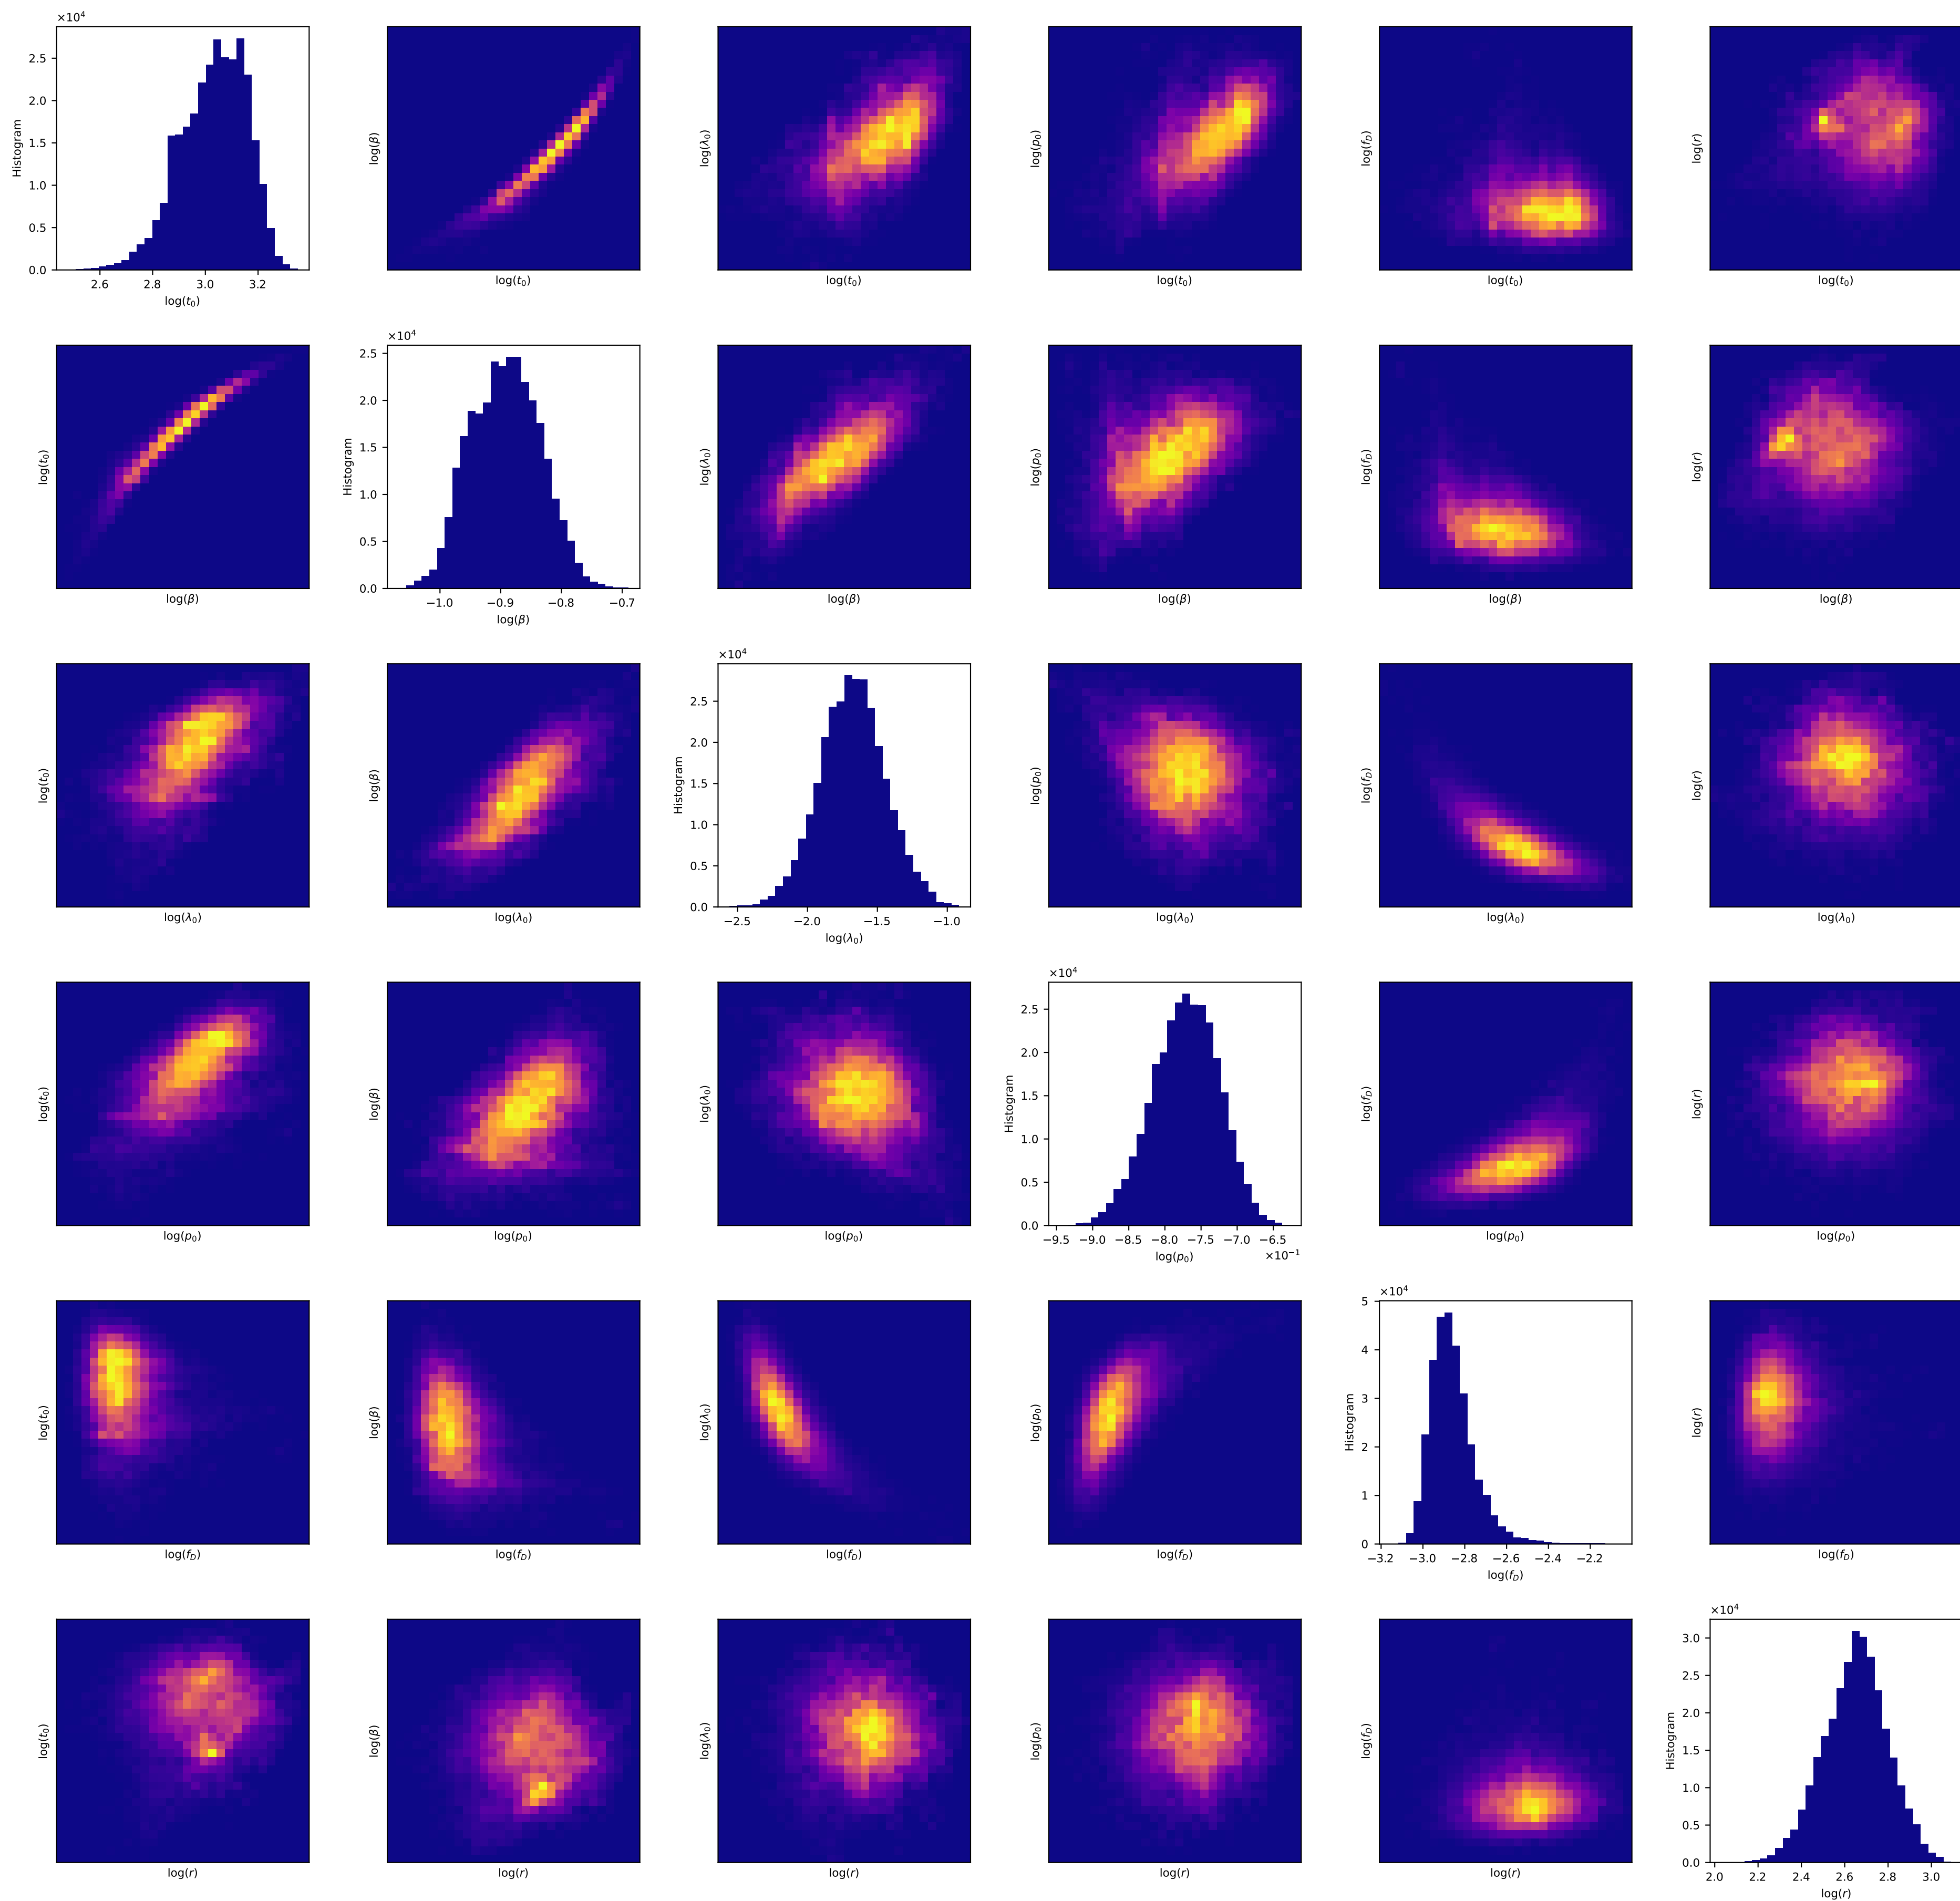

# Massachusetts

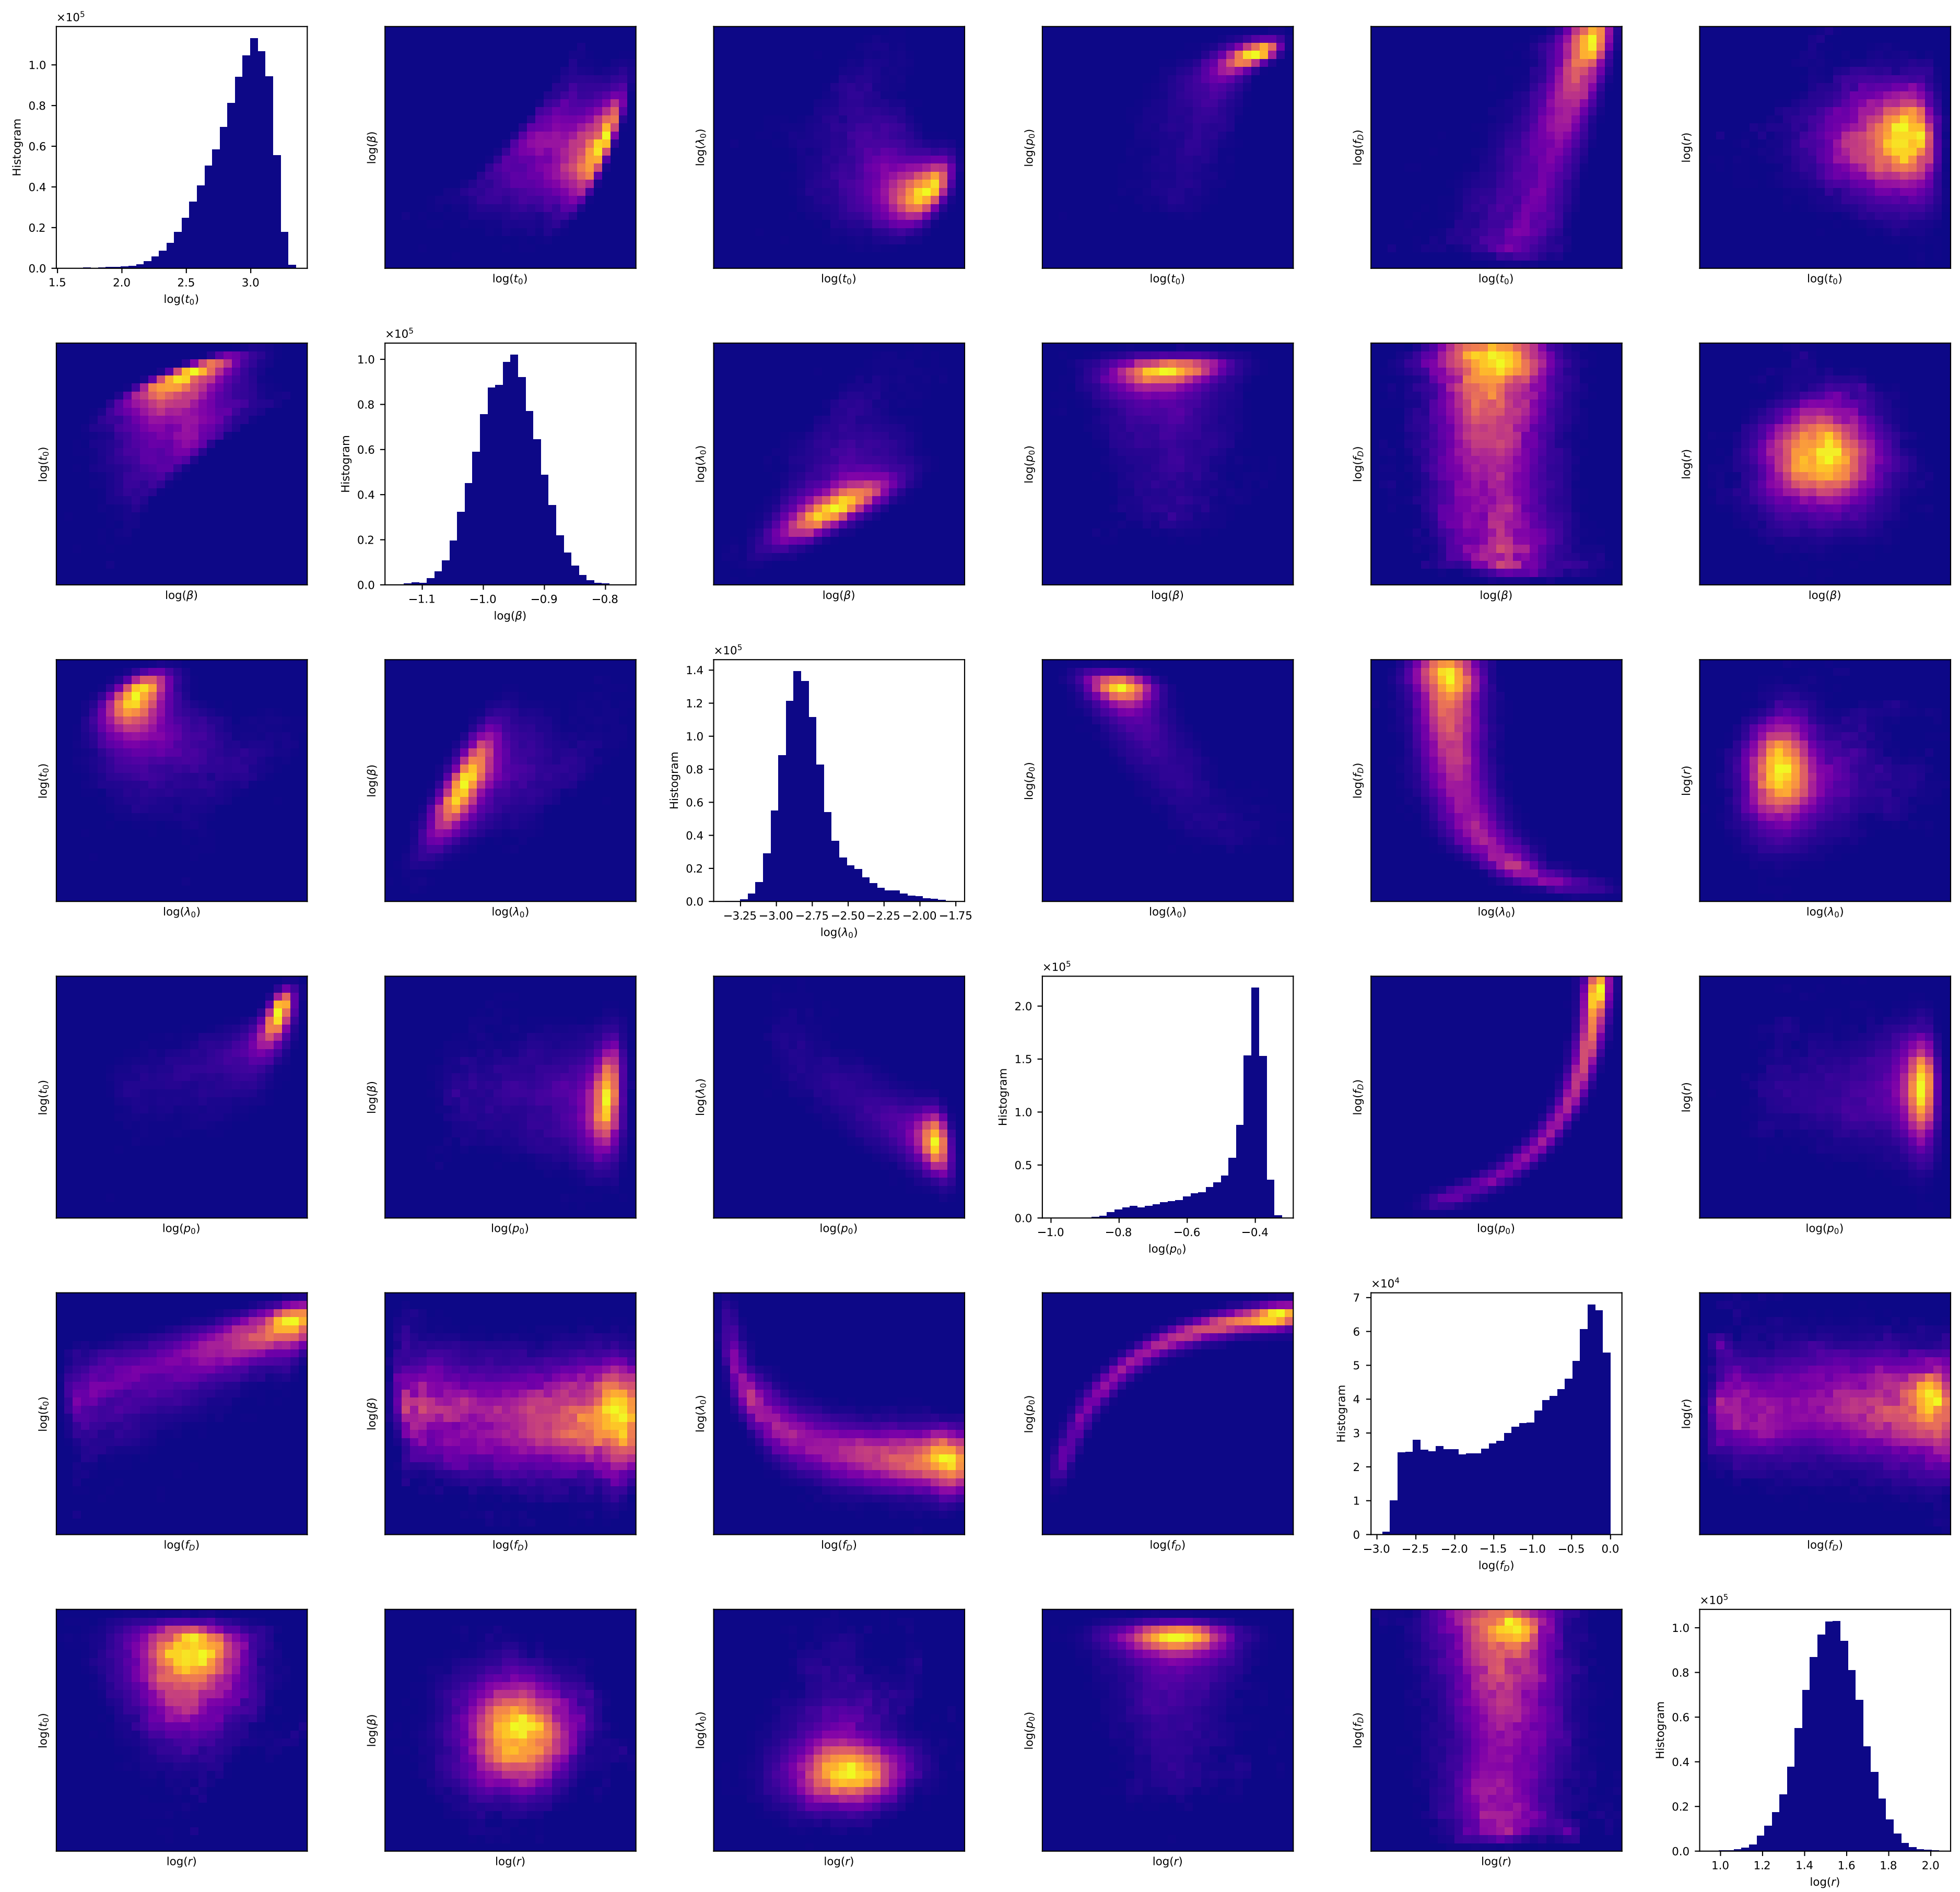

# Michigan

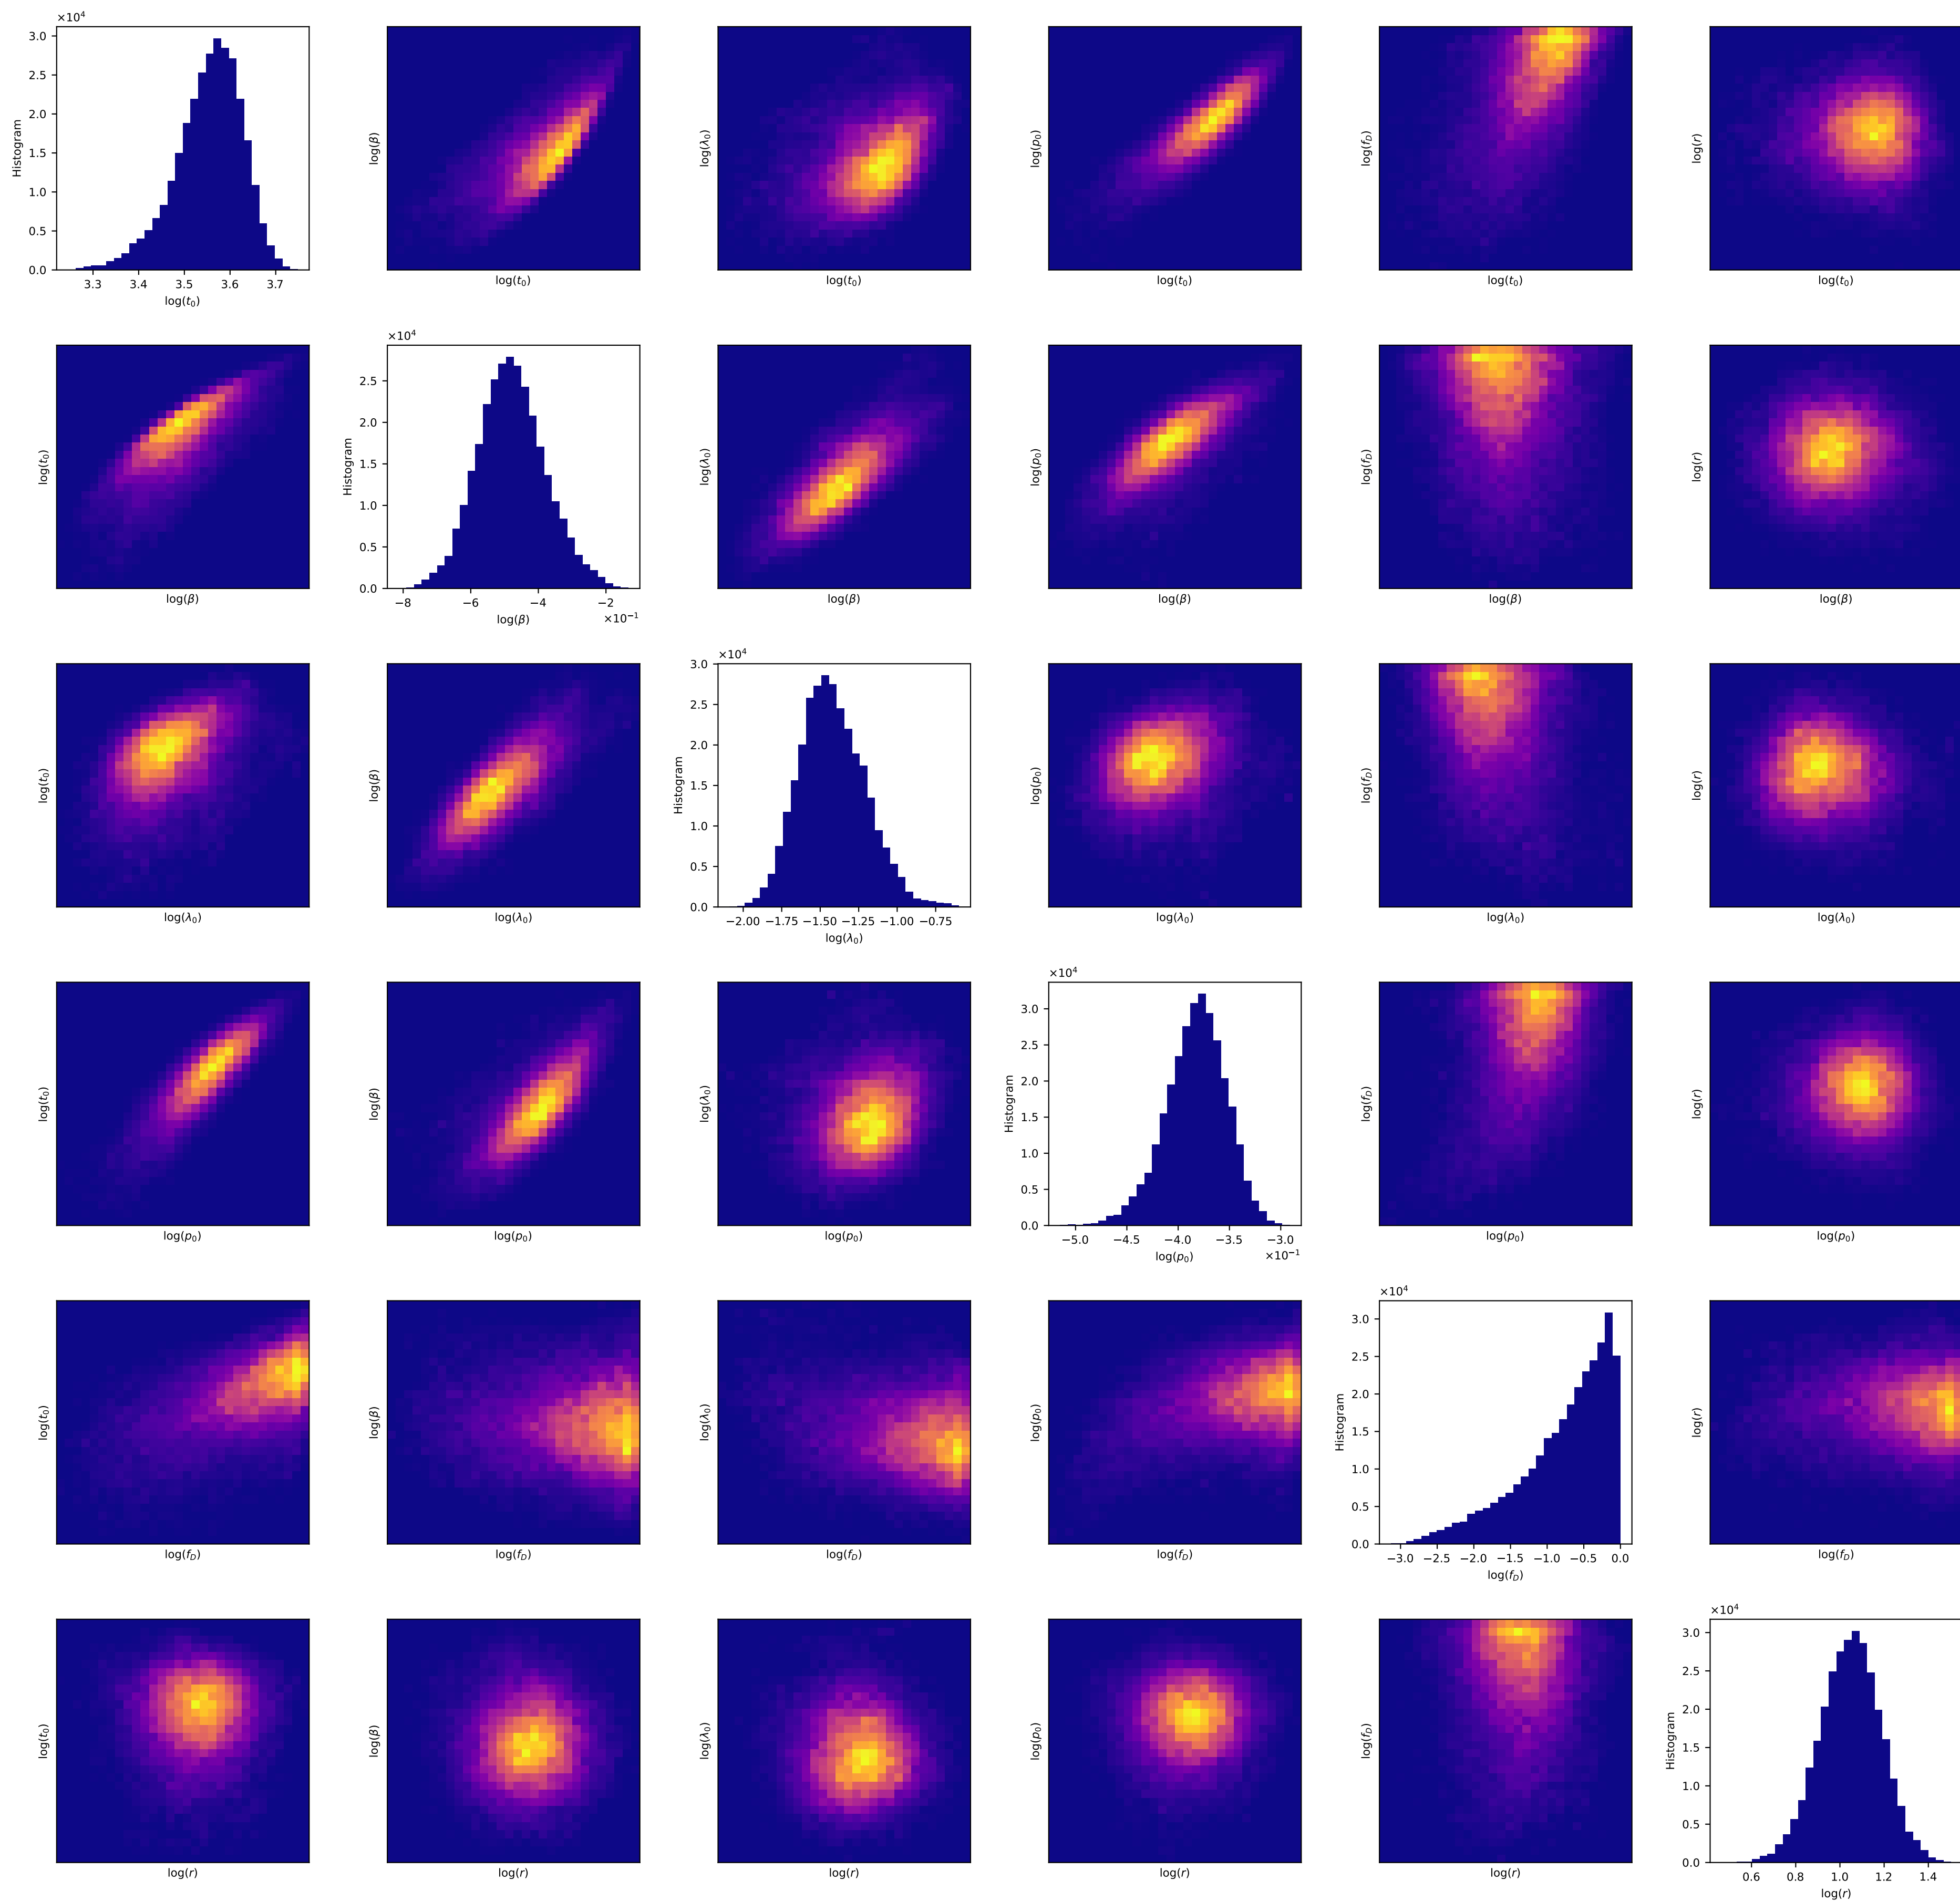

# Minnesota

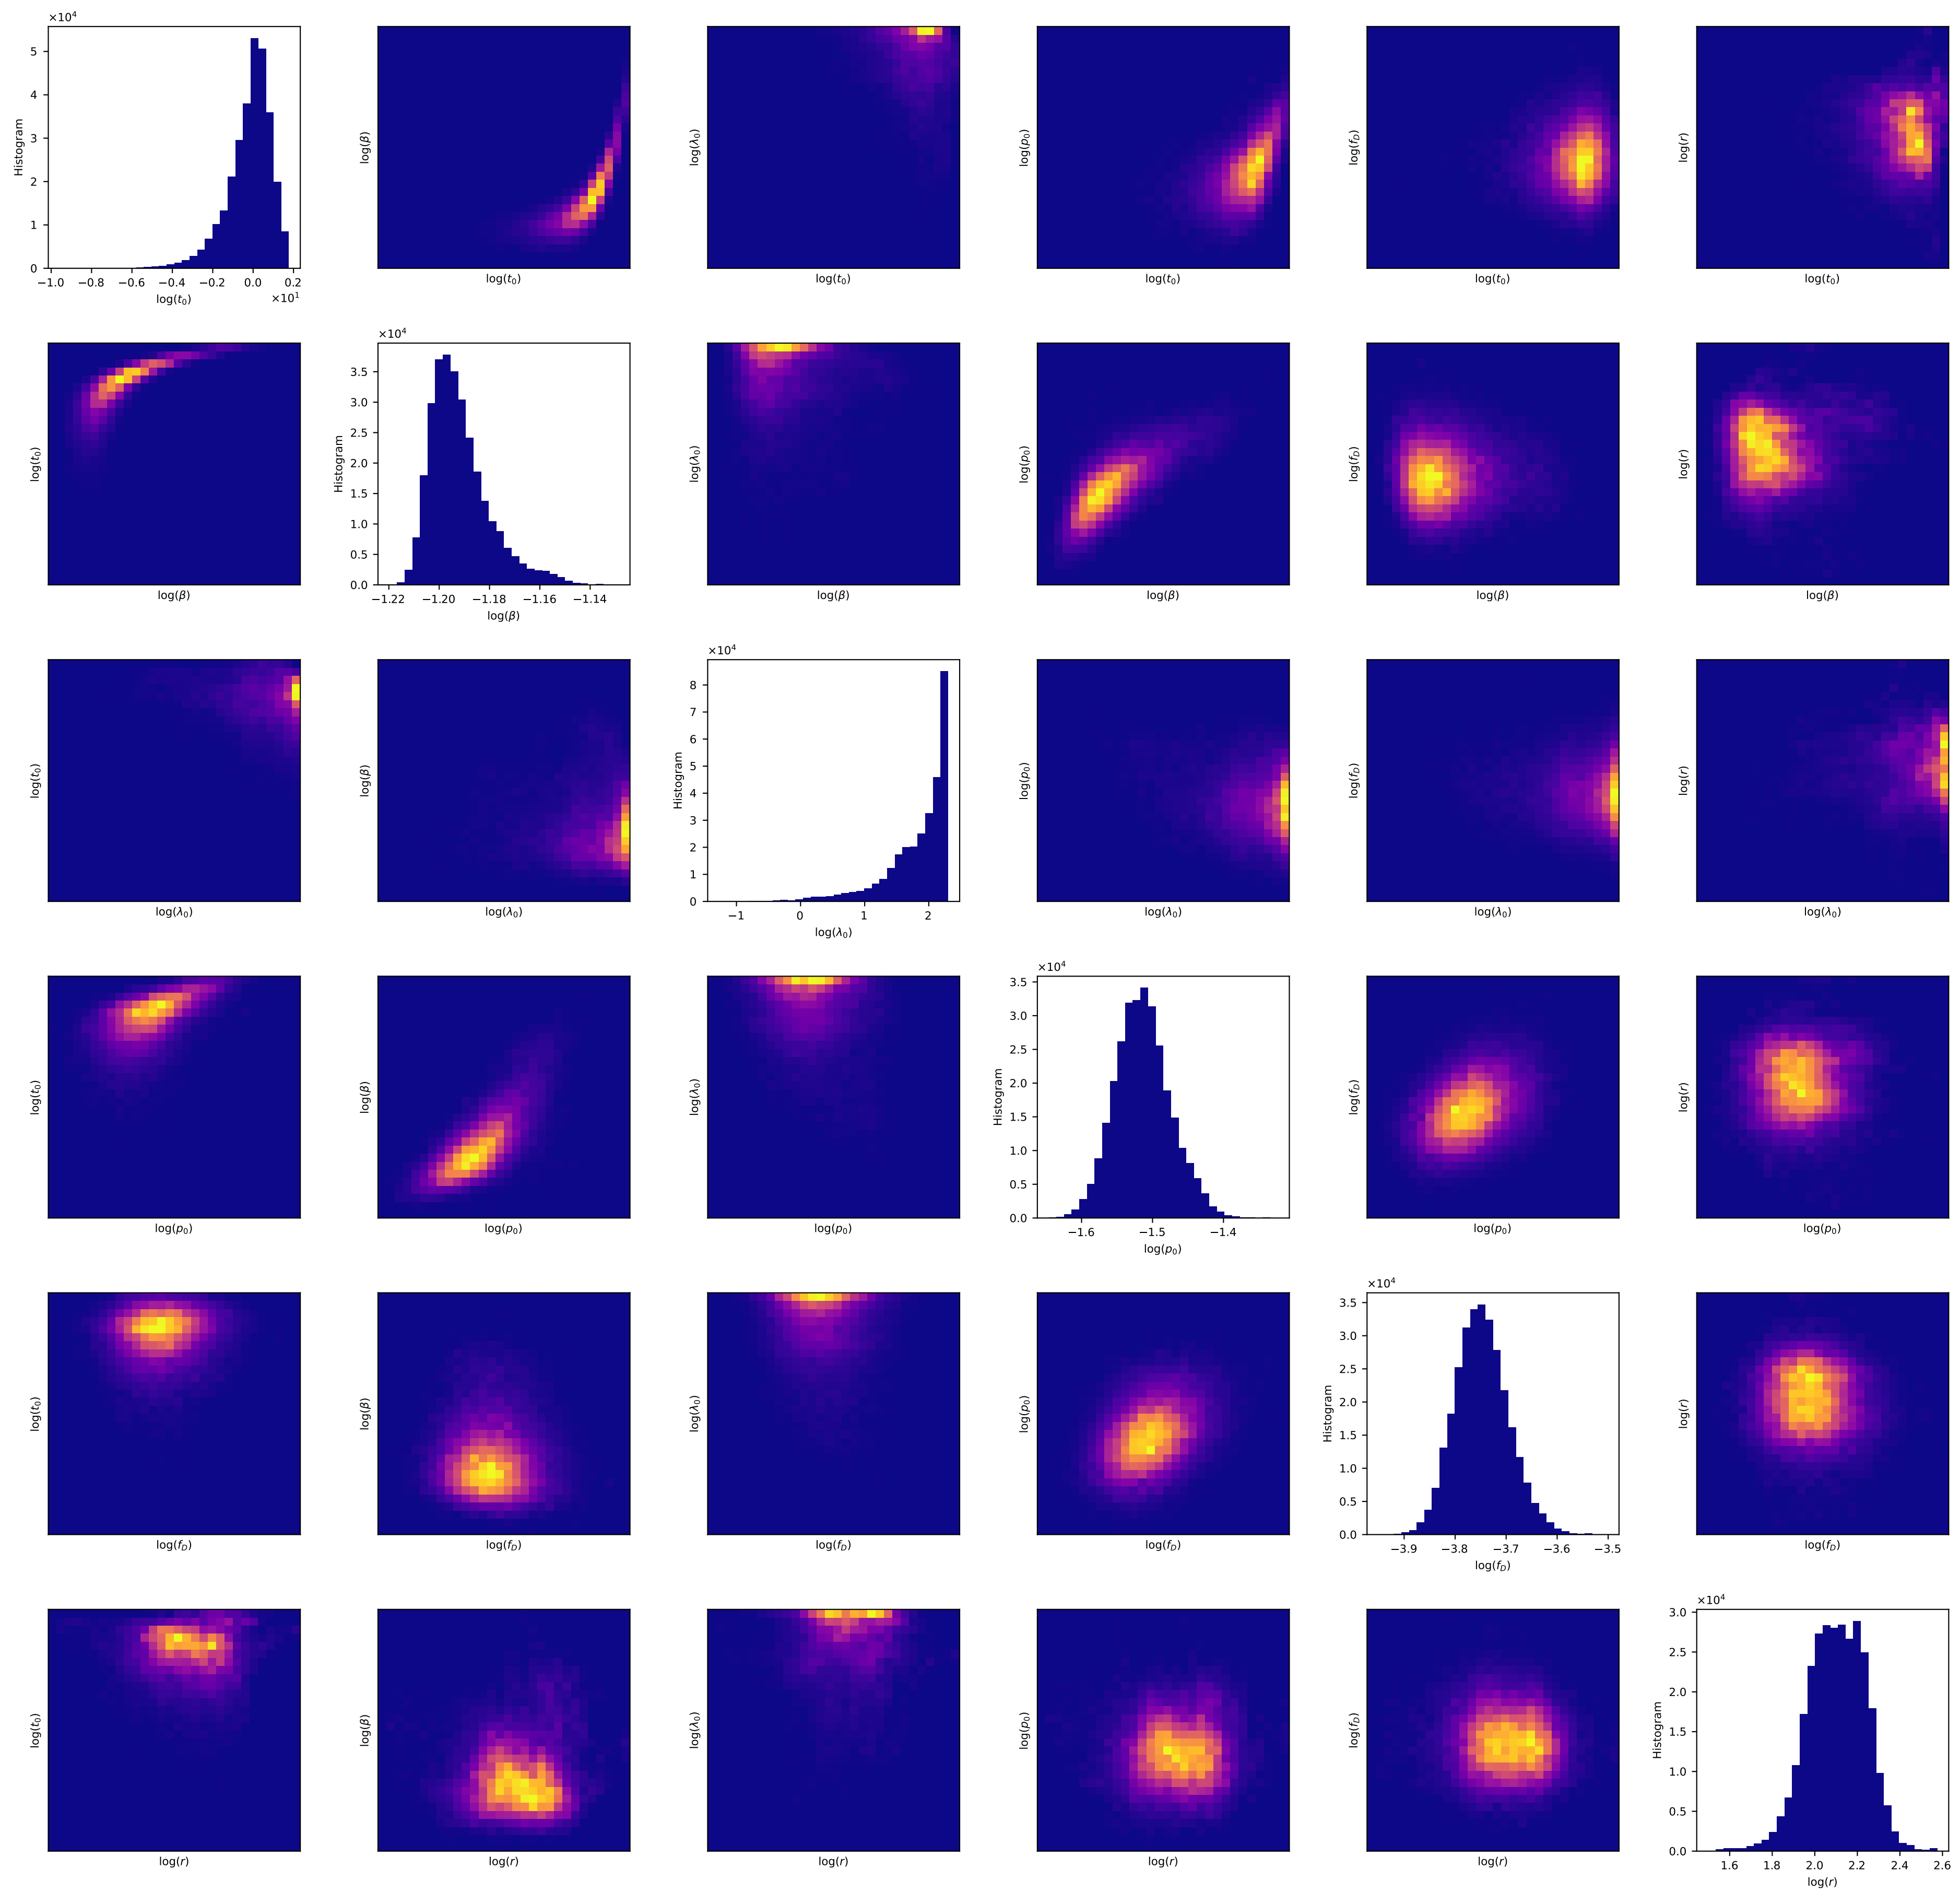

# Mississippi

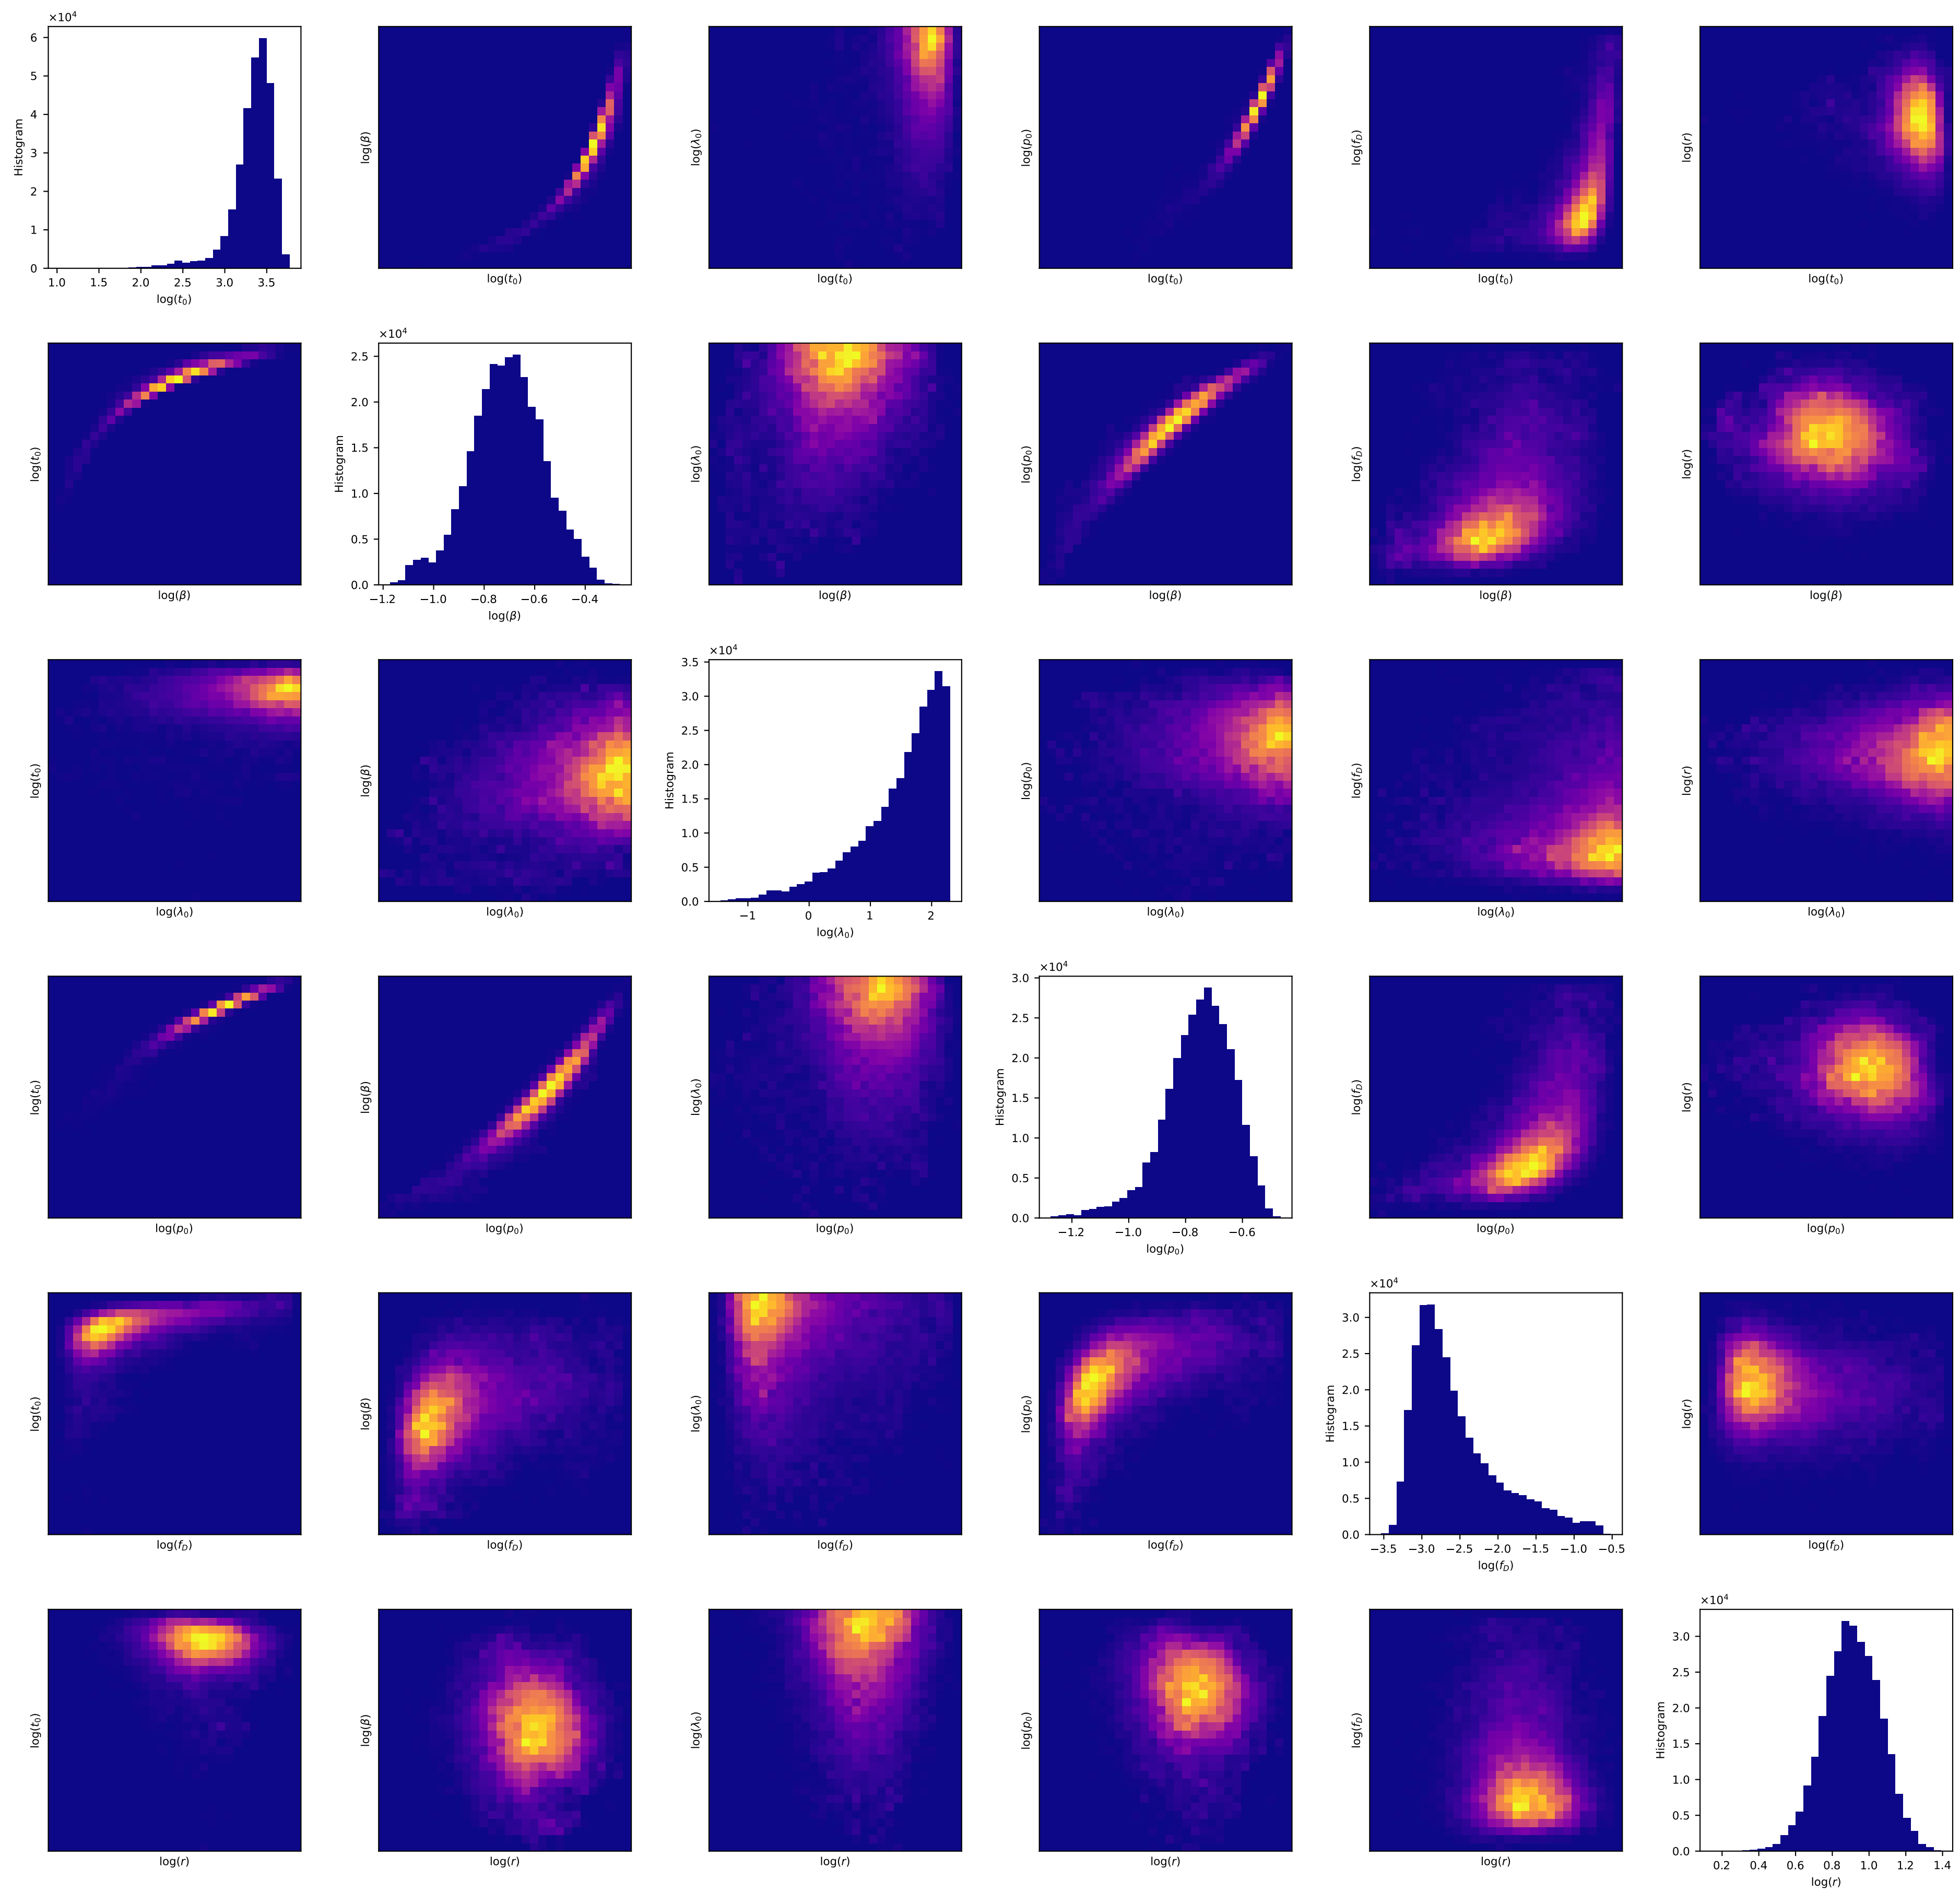

# Missouri

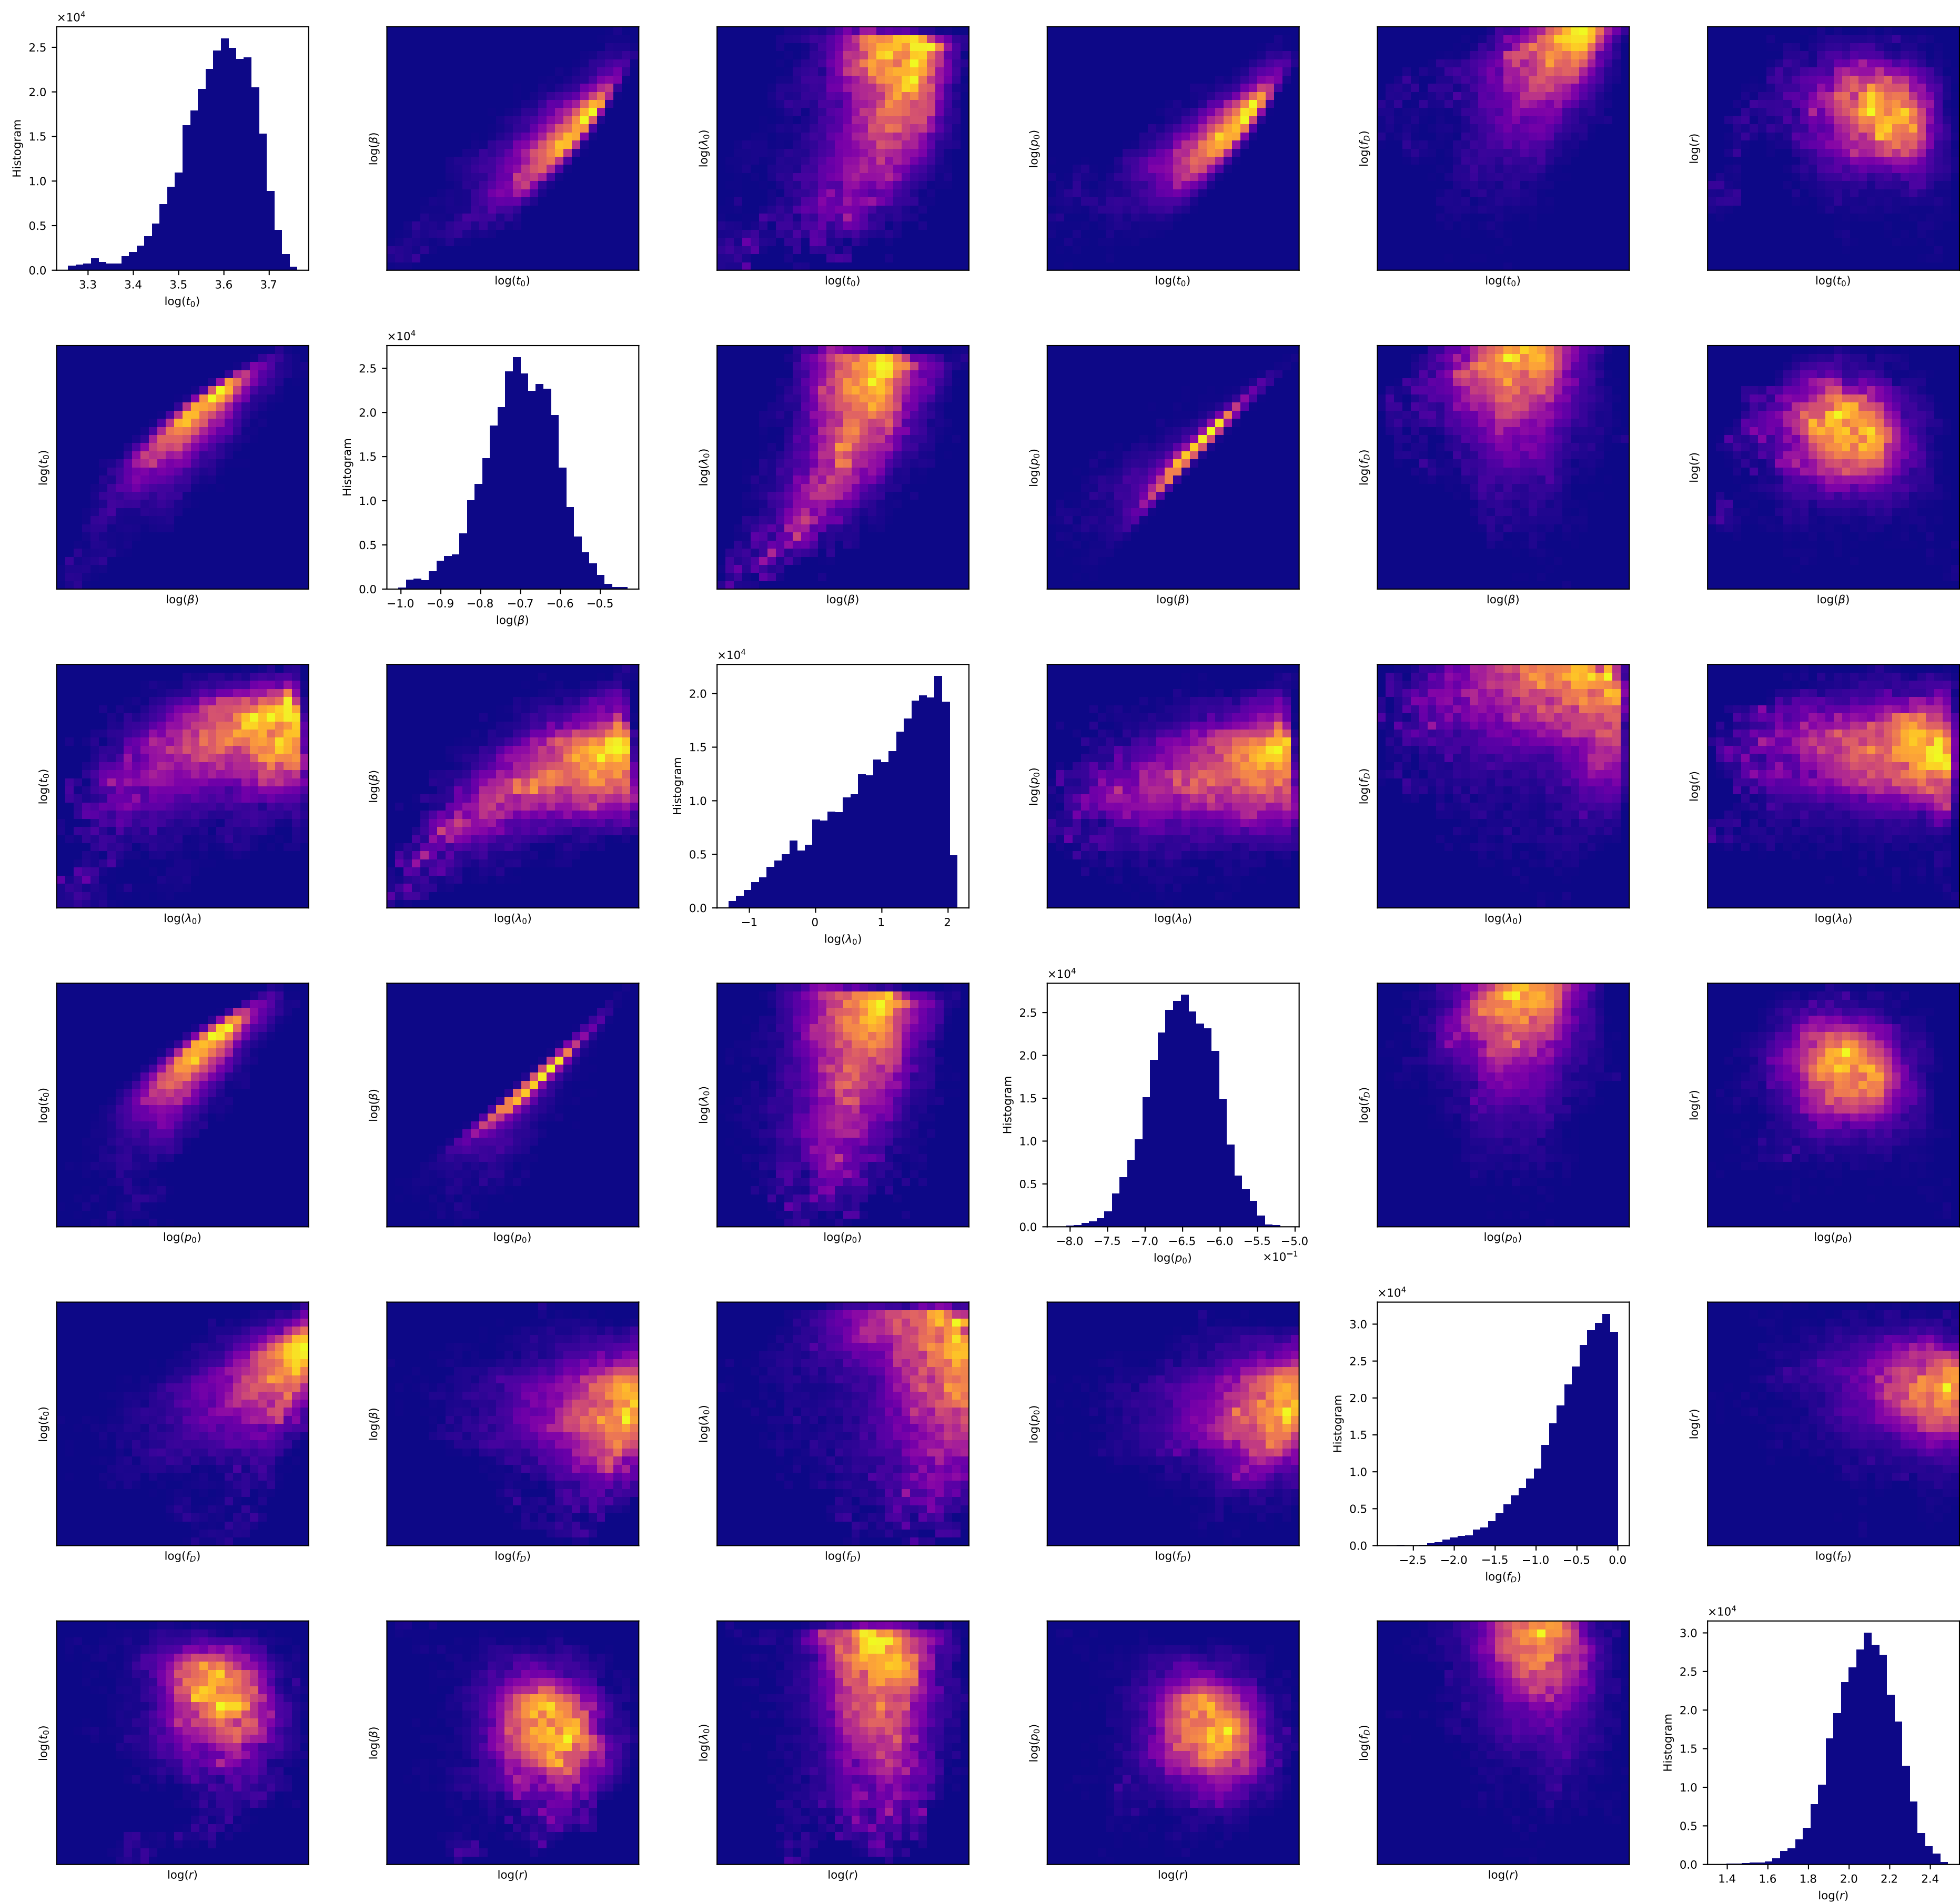

# Montana

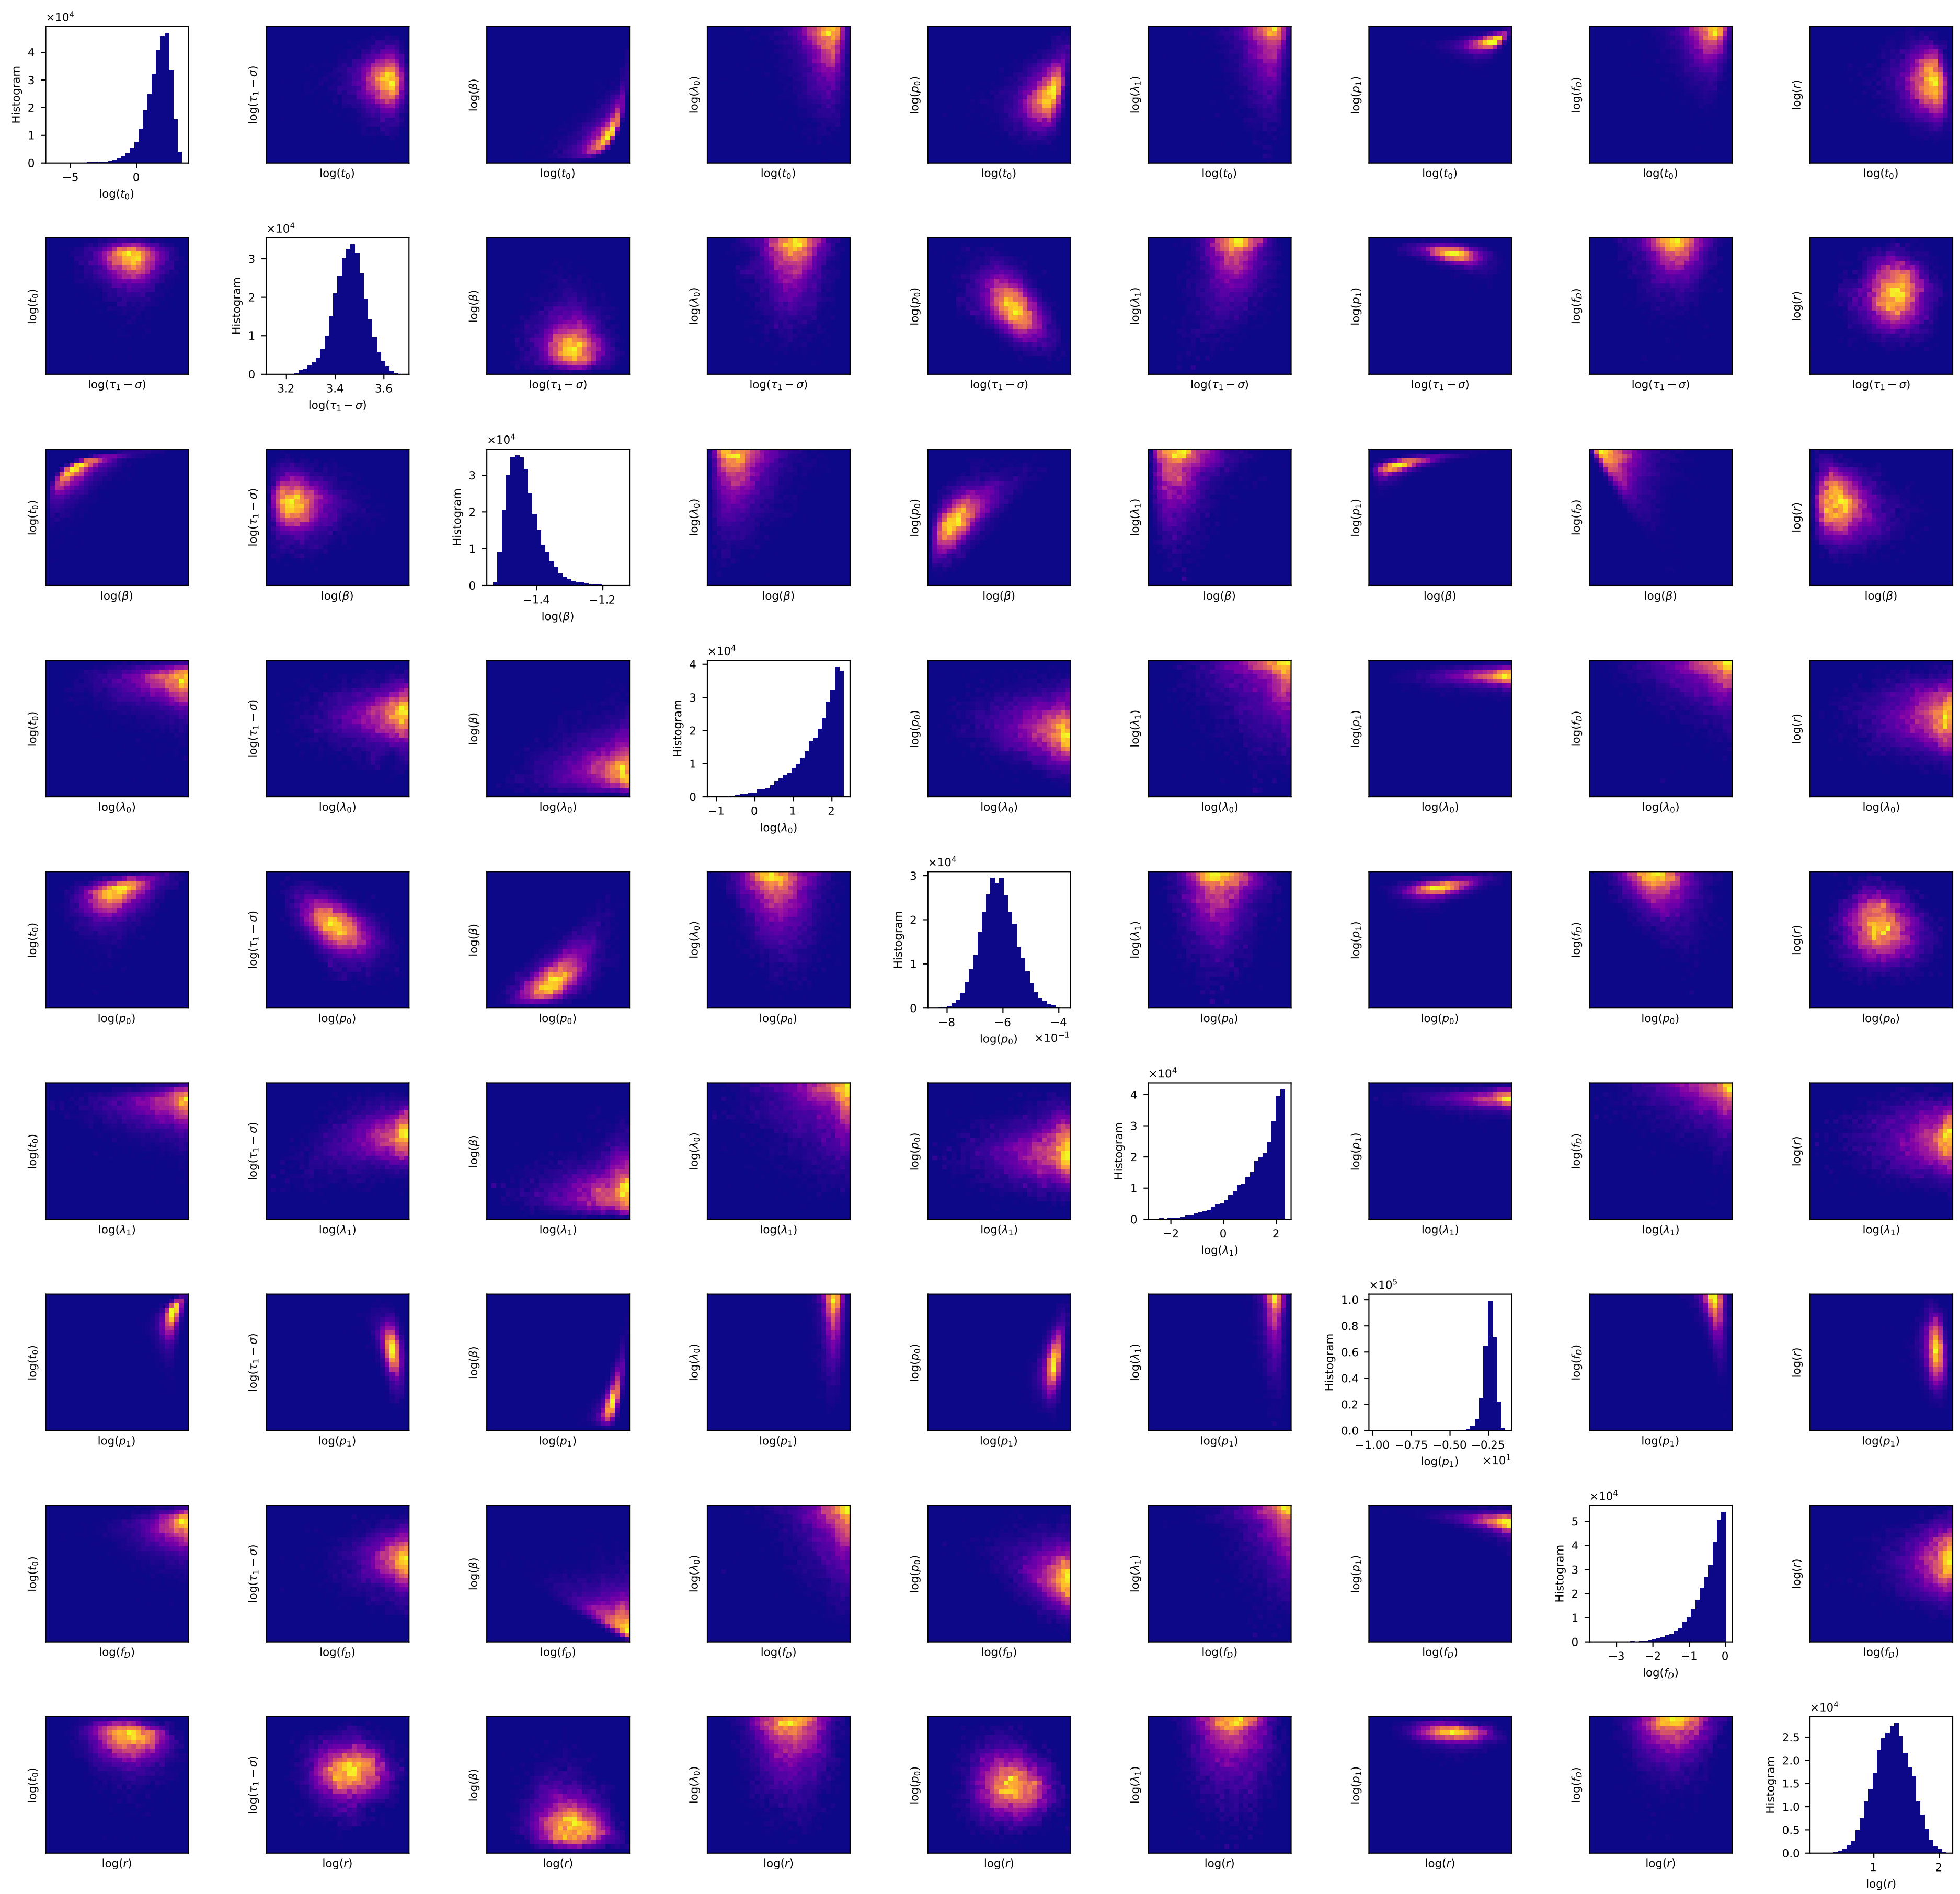



# Nebraska

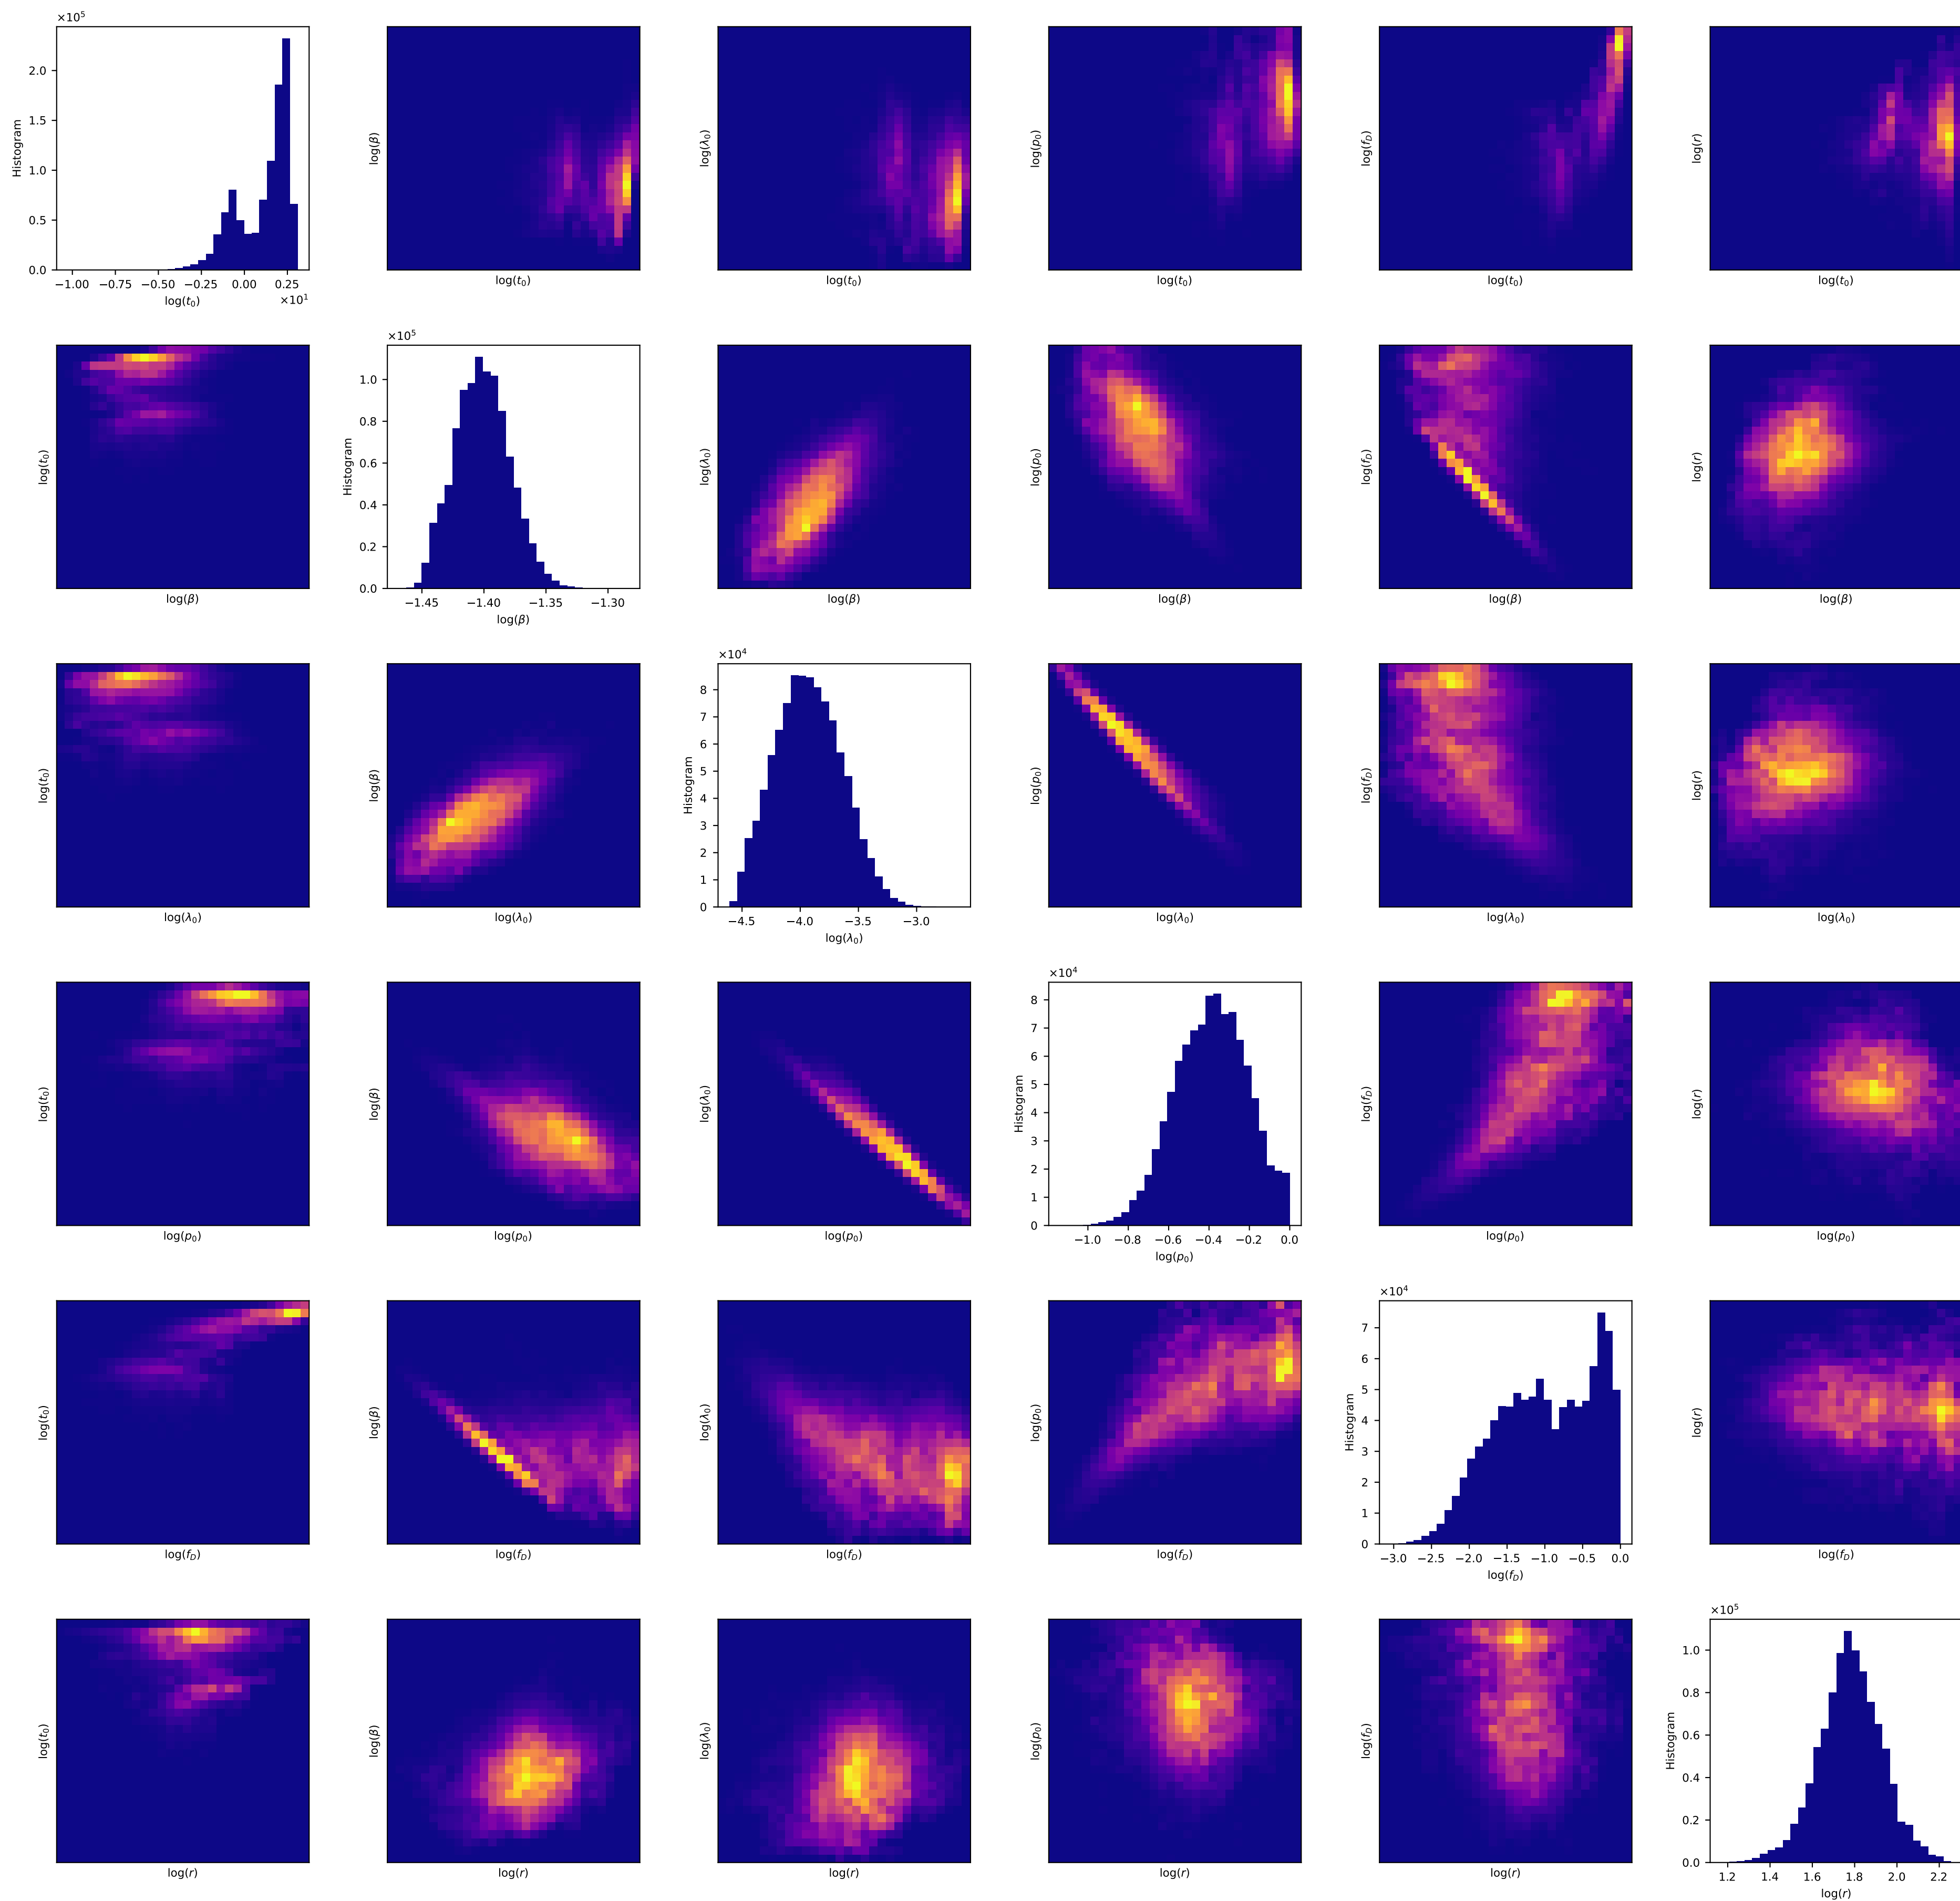

# Nevada

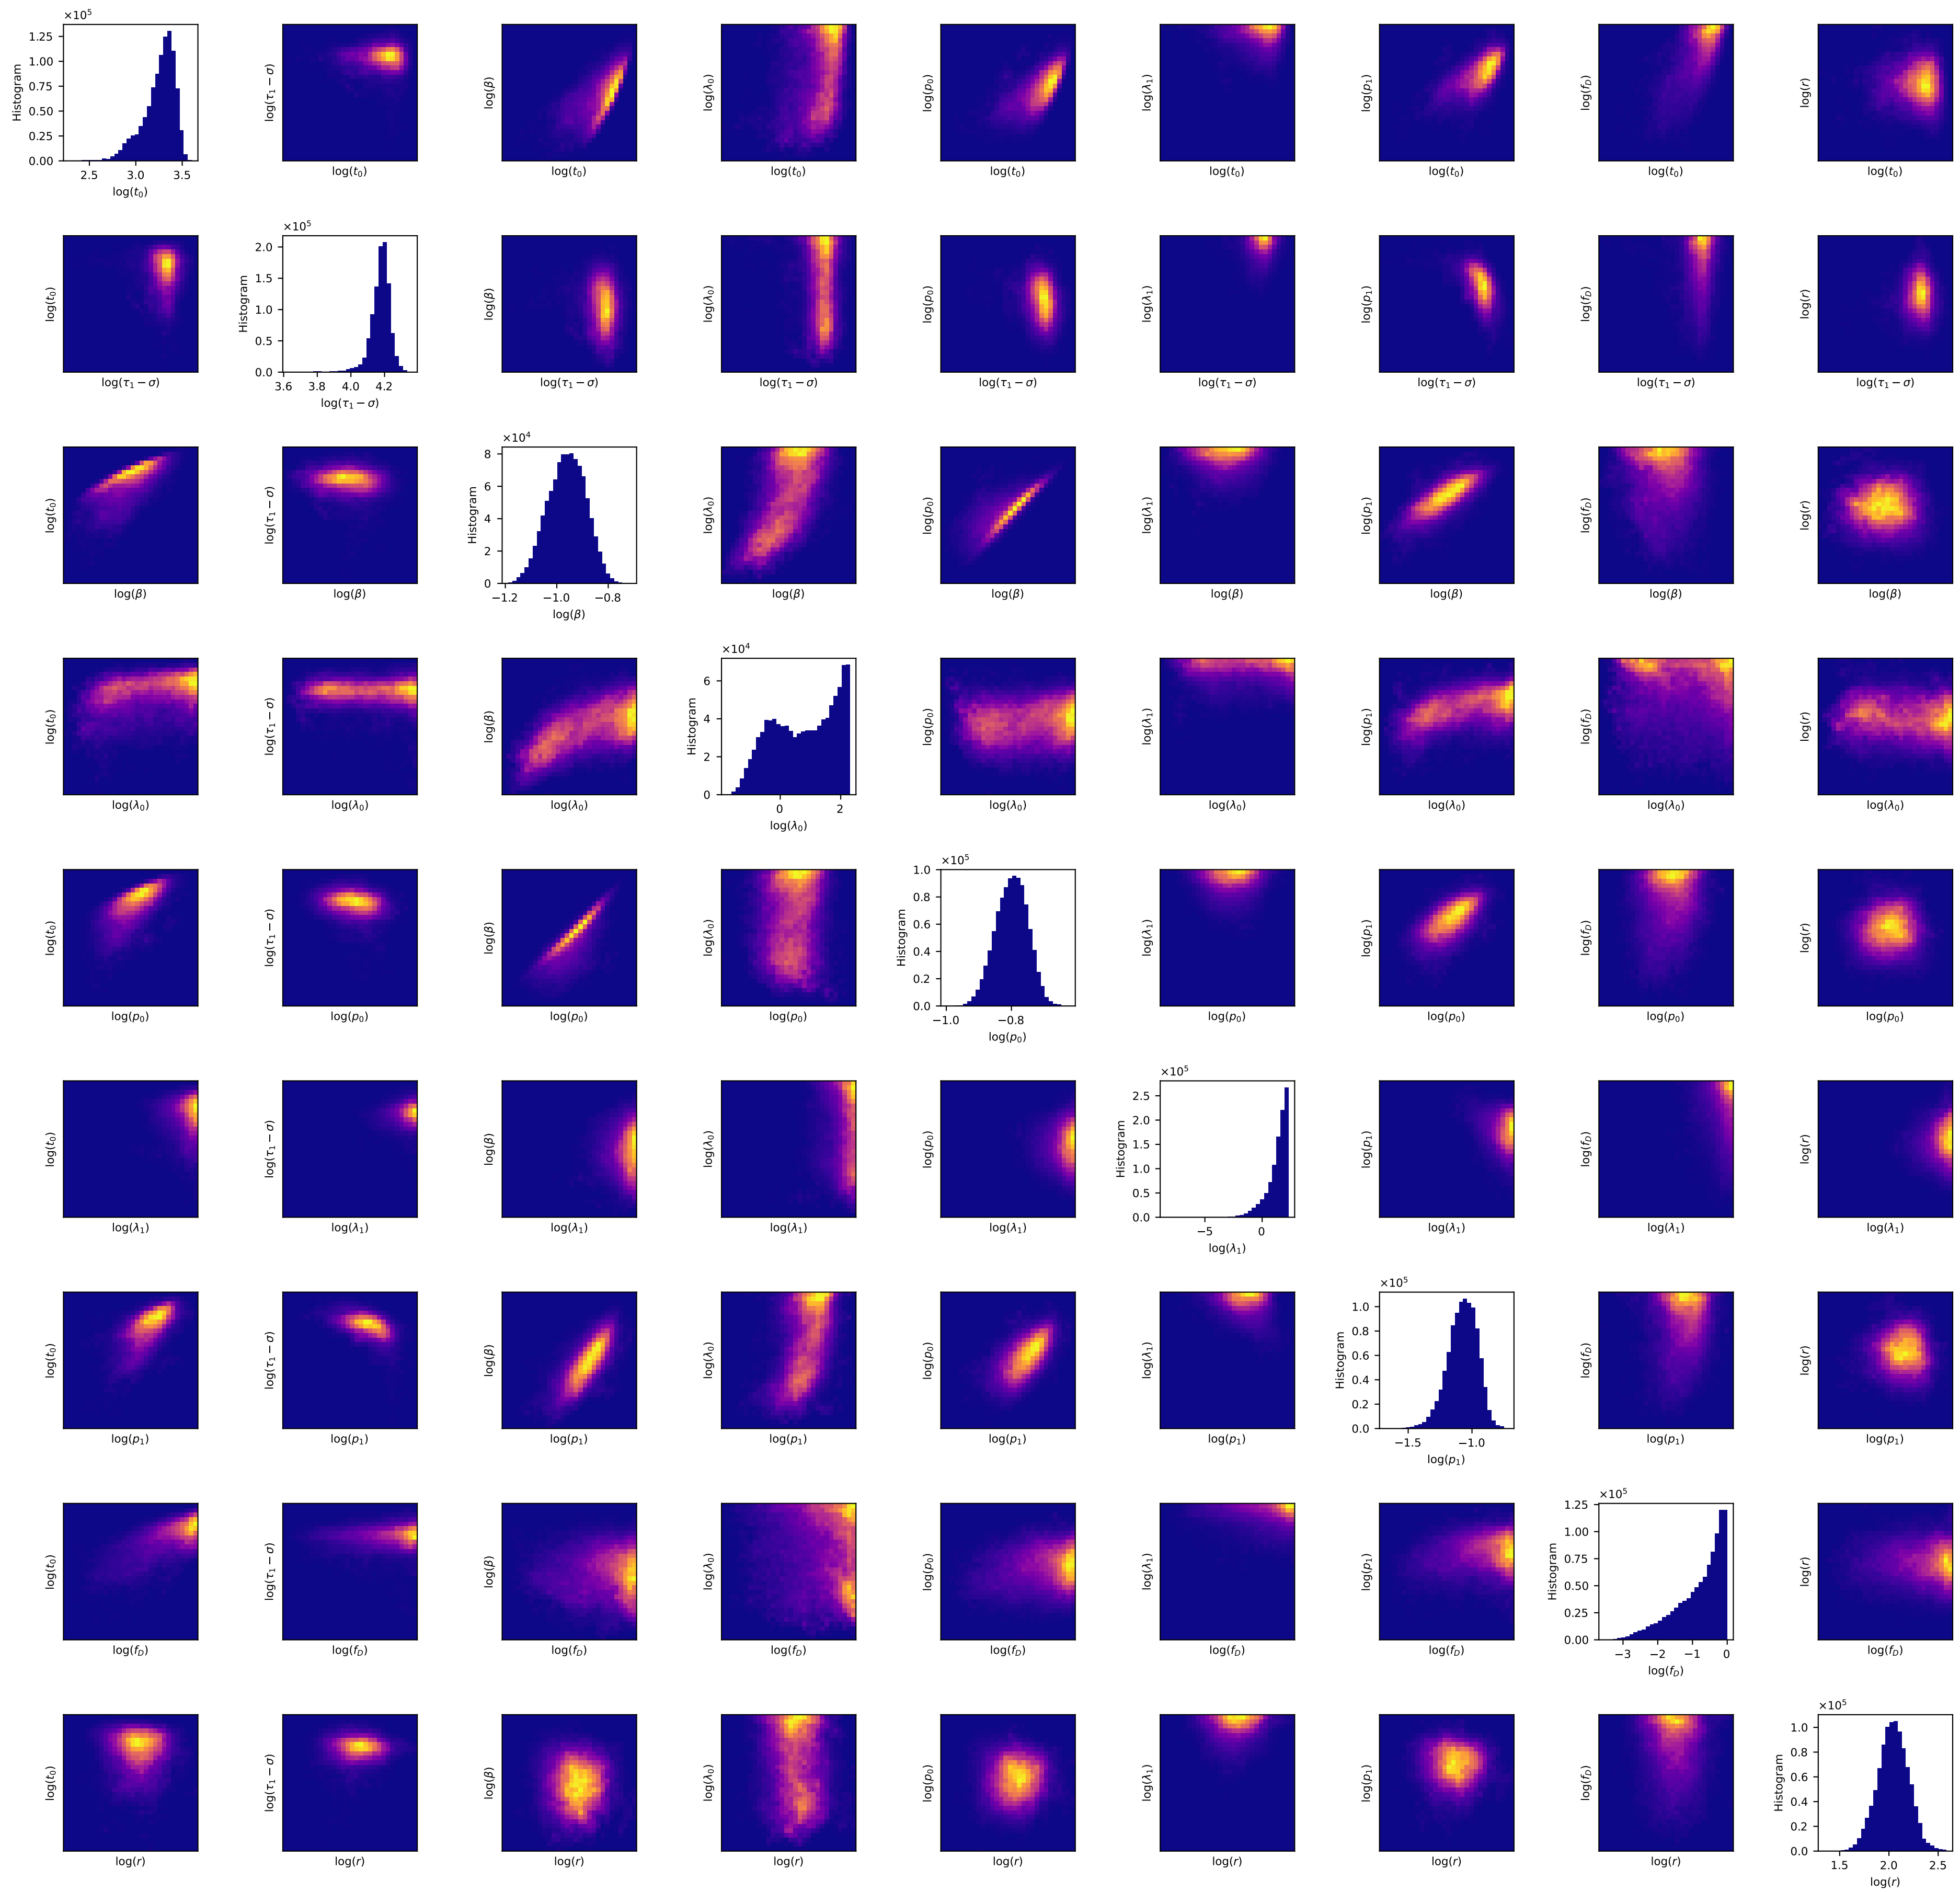

# New Hampshire

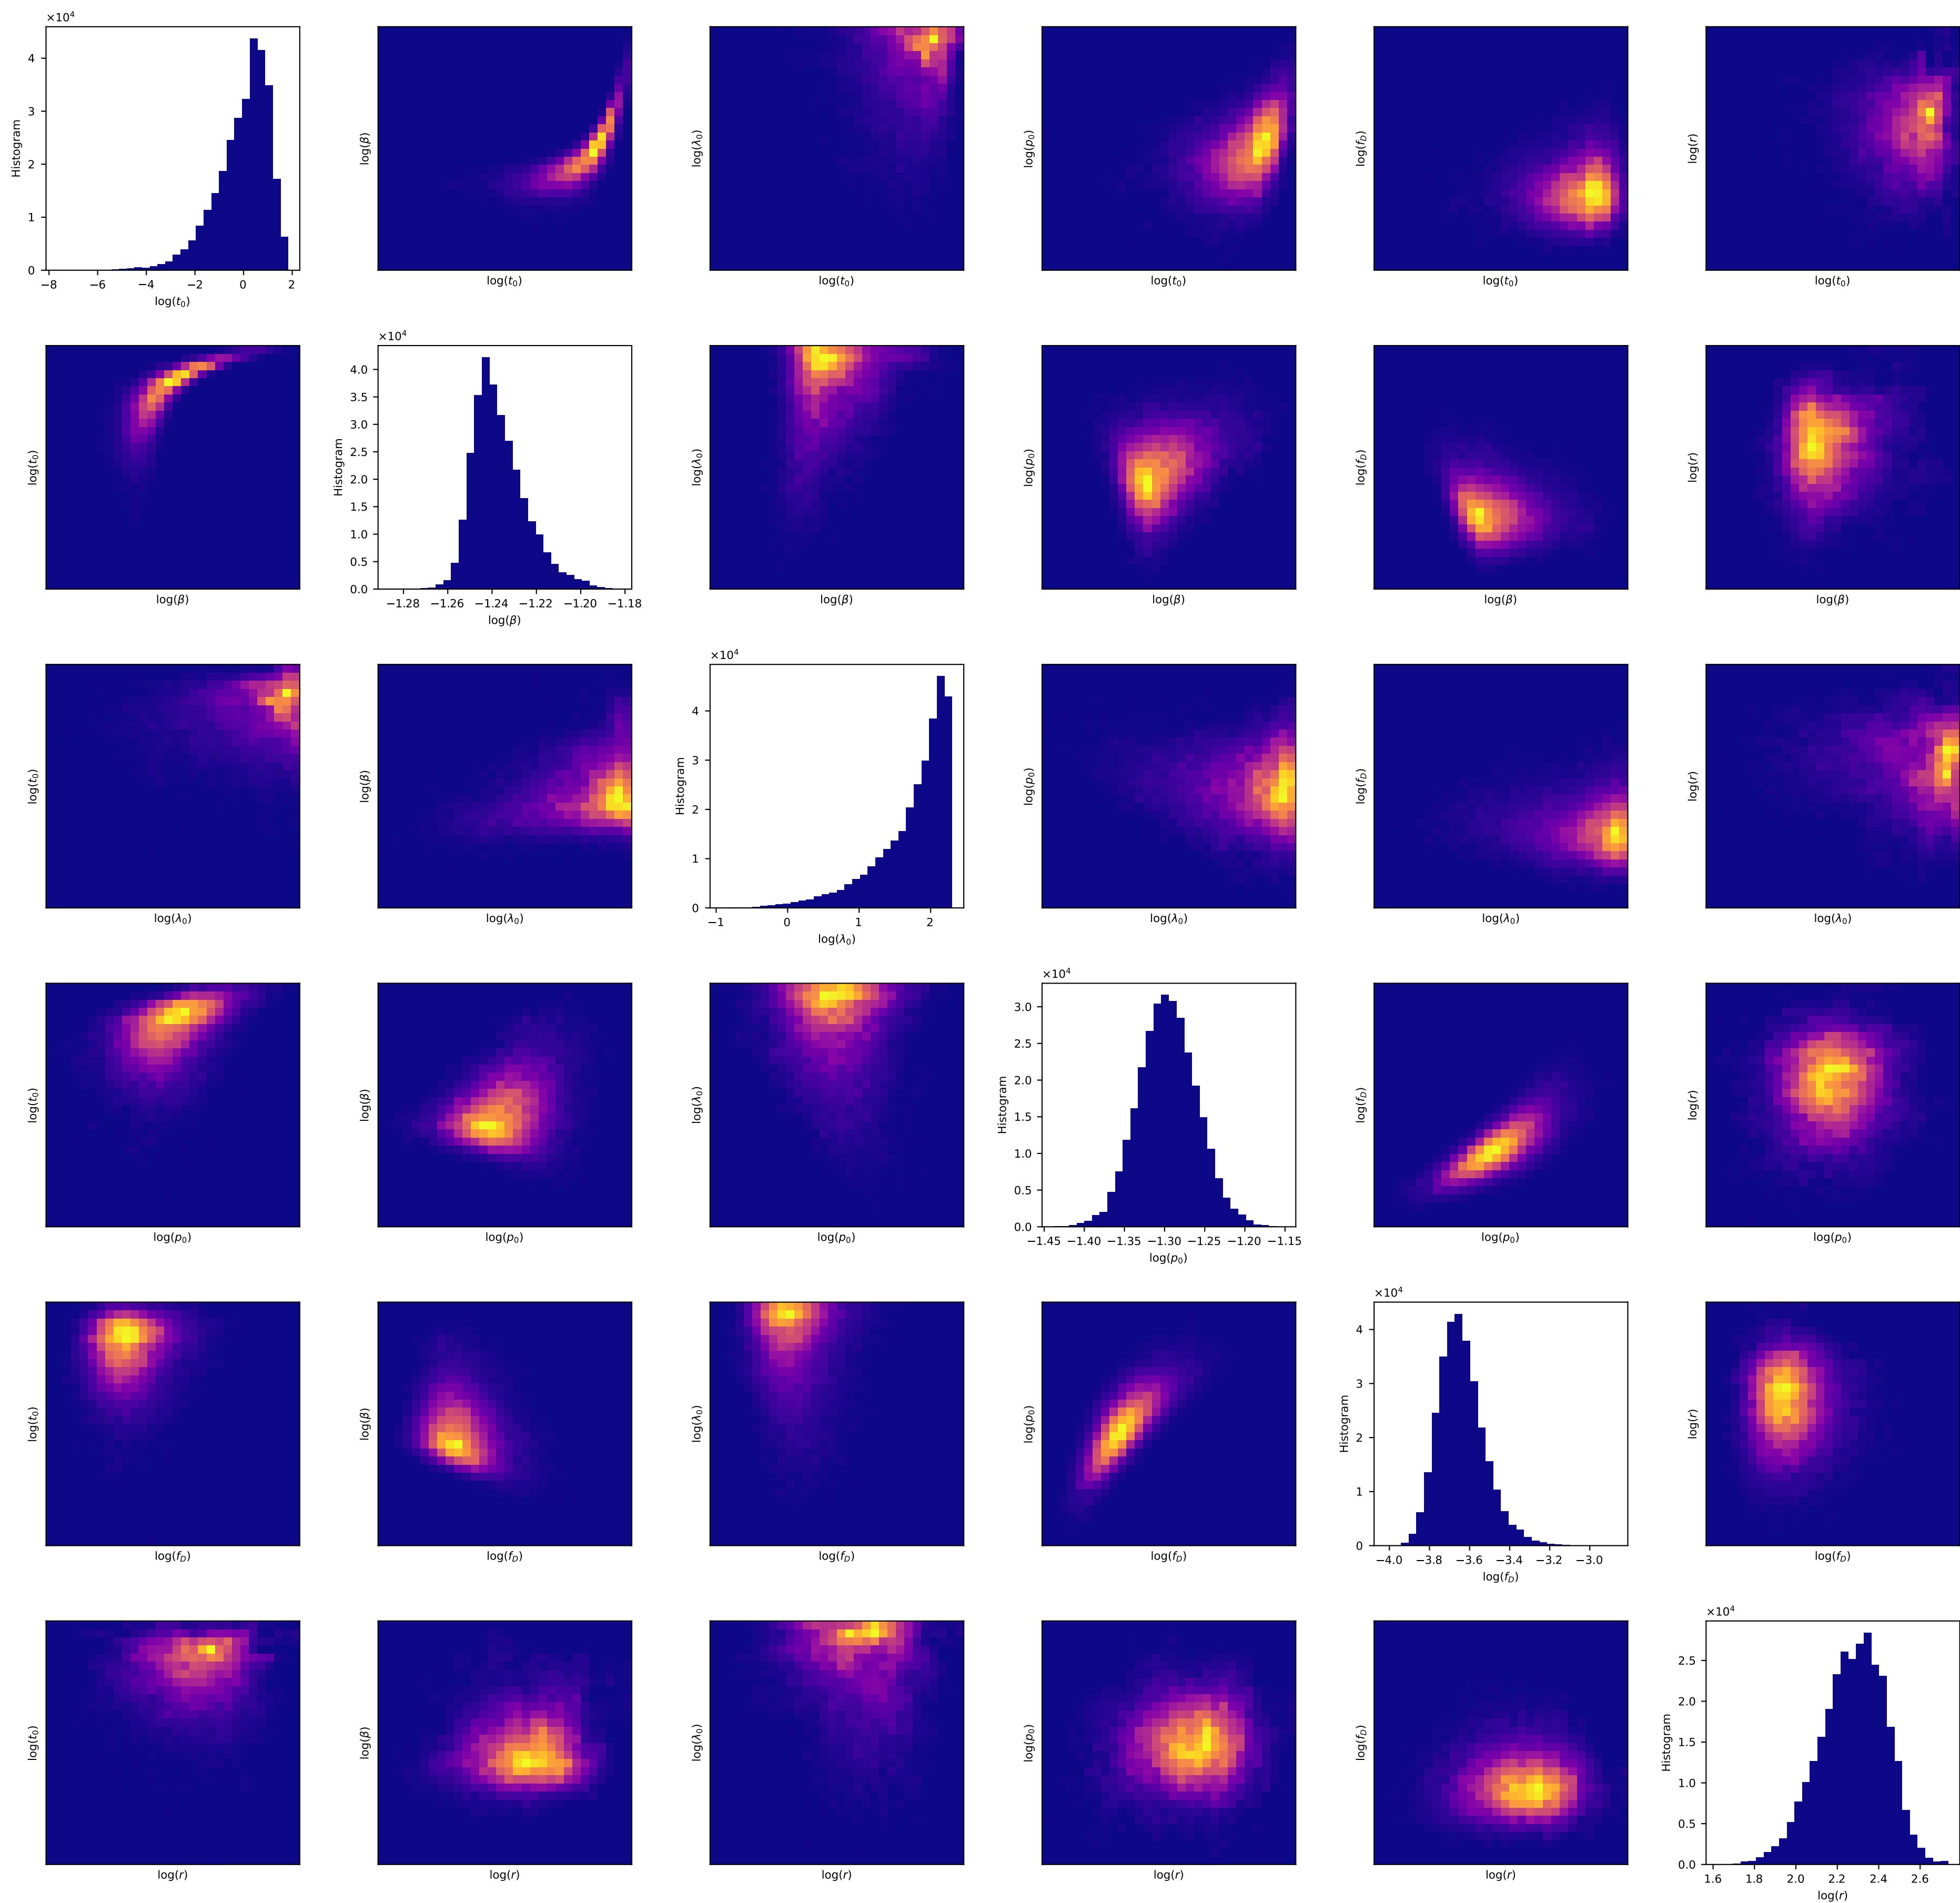

# New Jersey

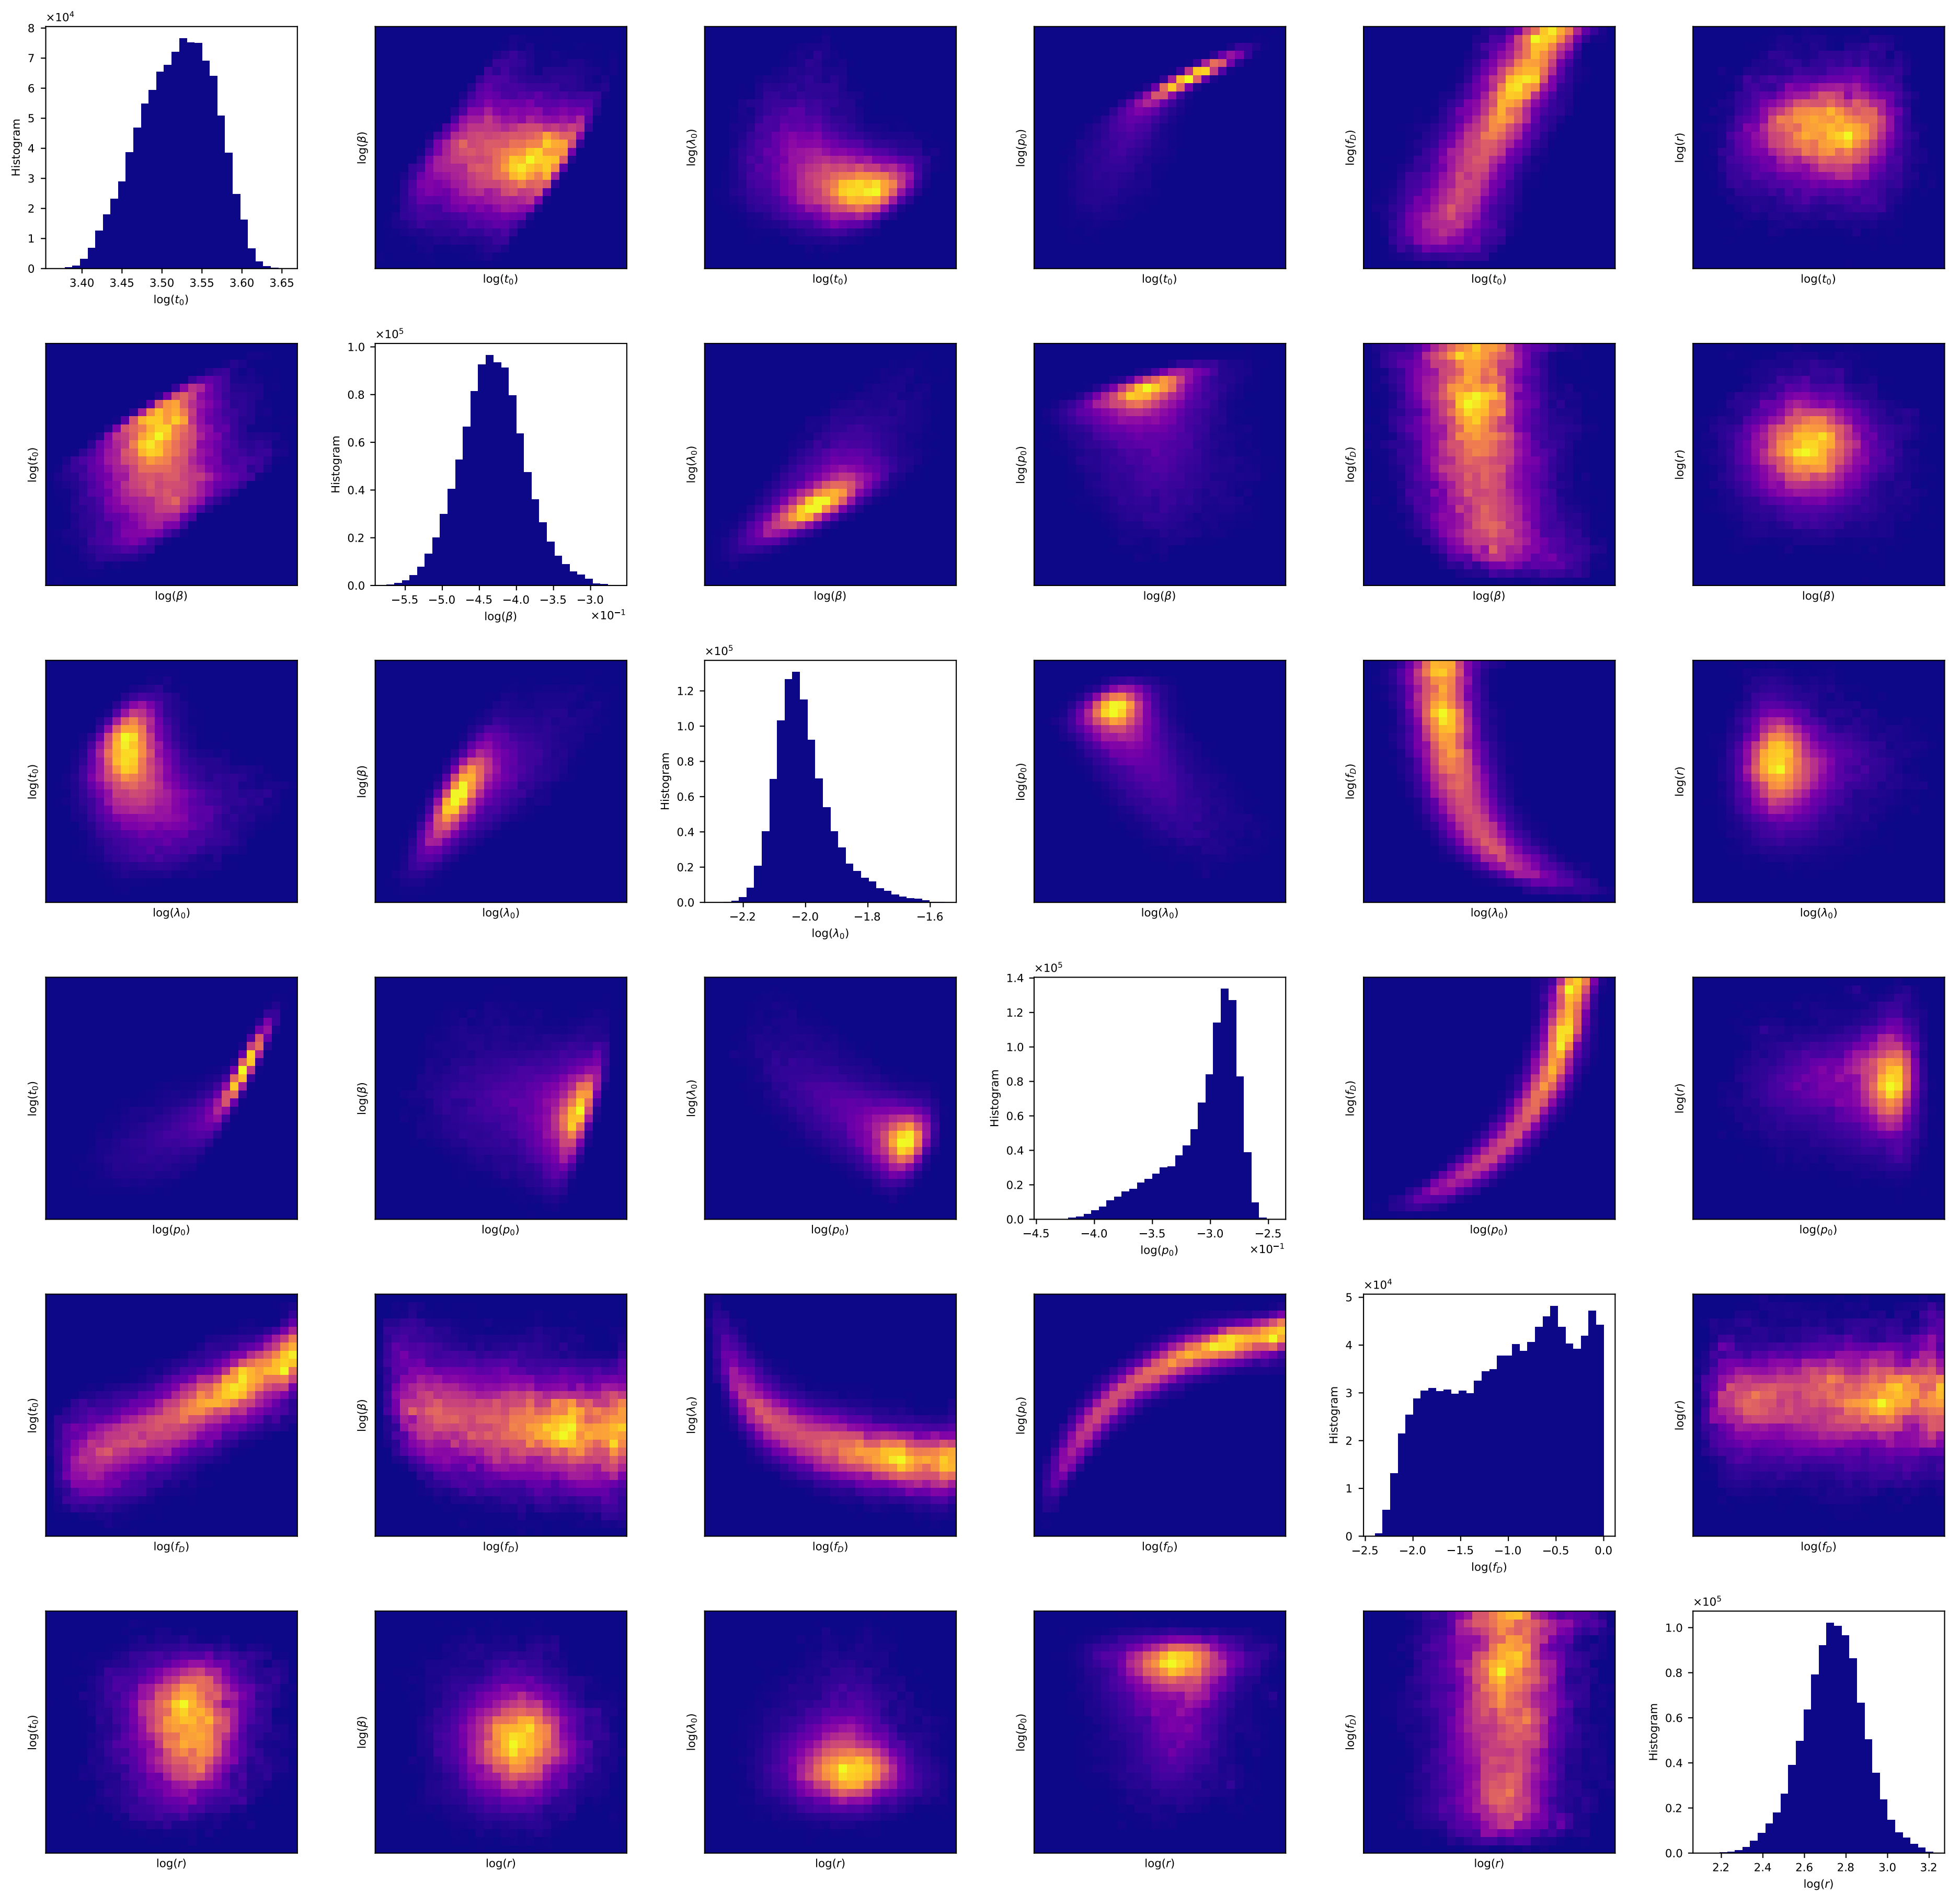

# New Mexico

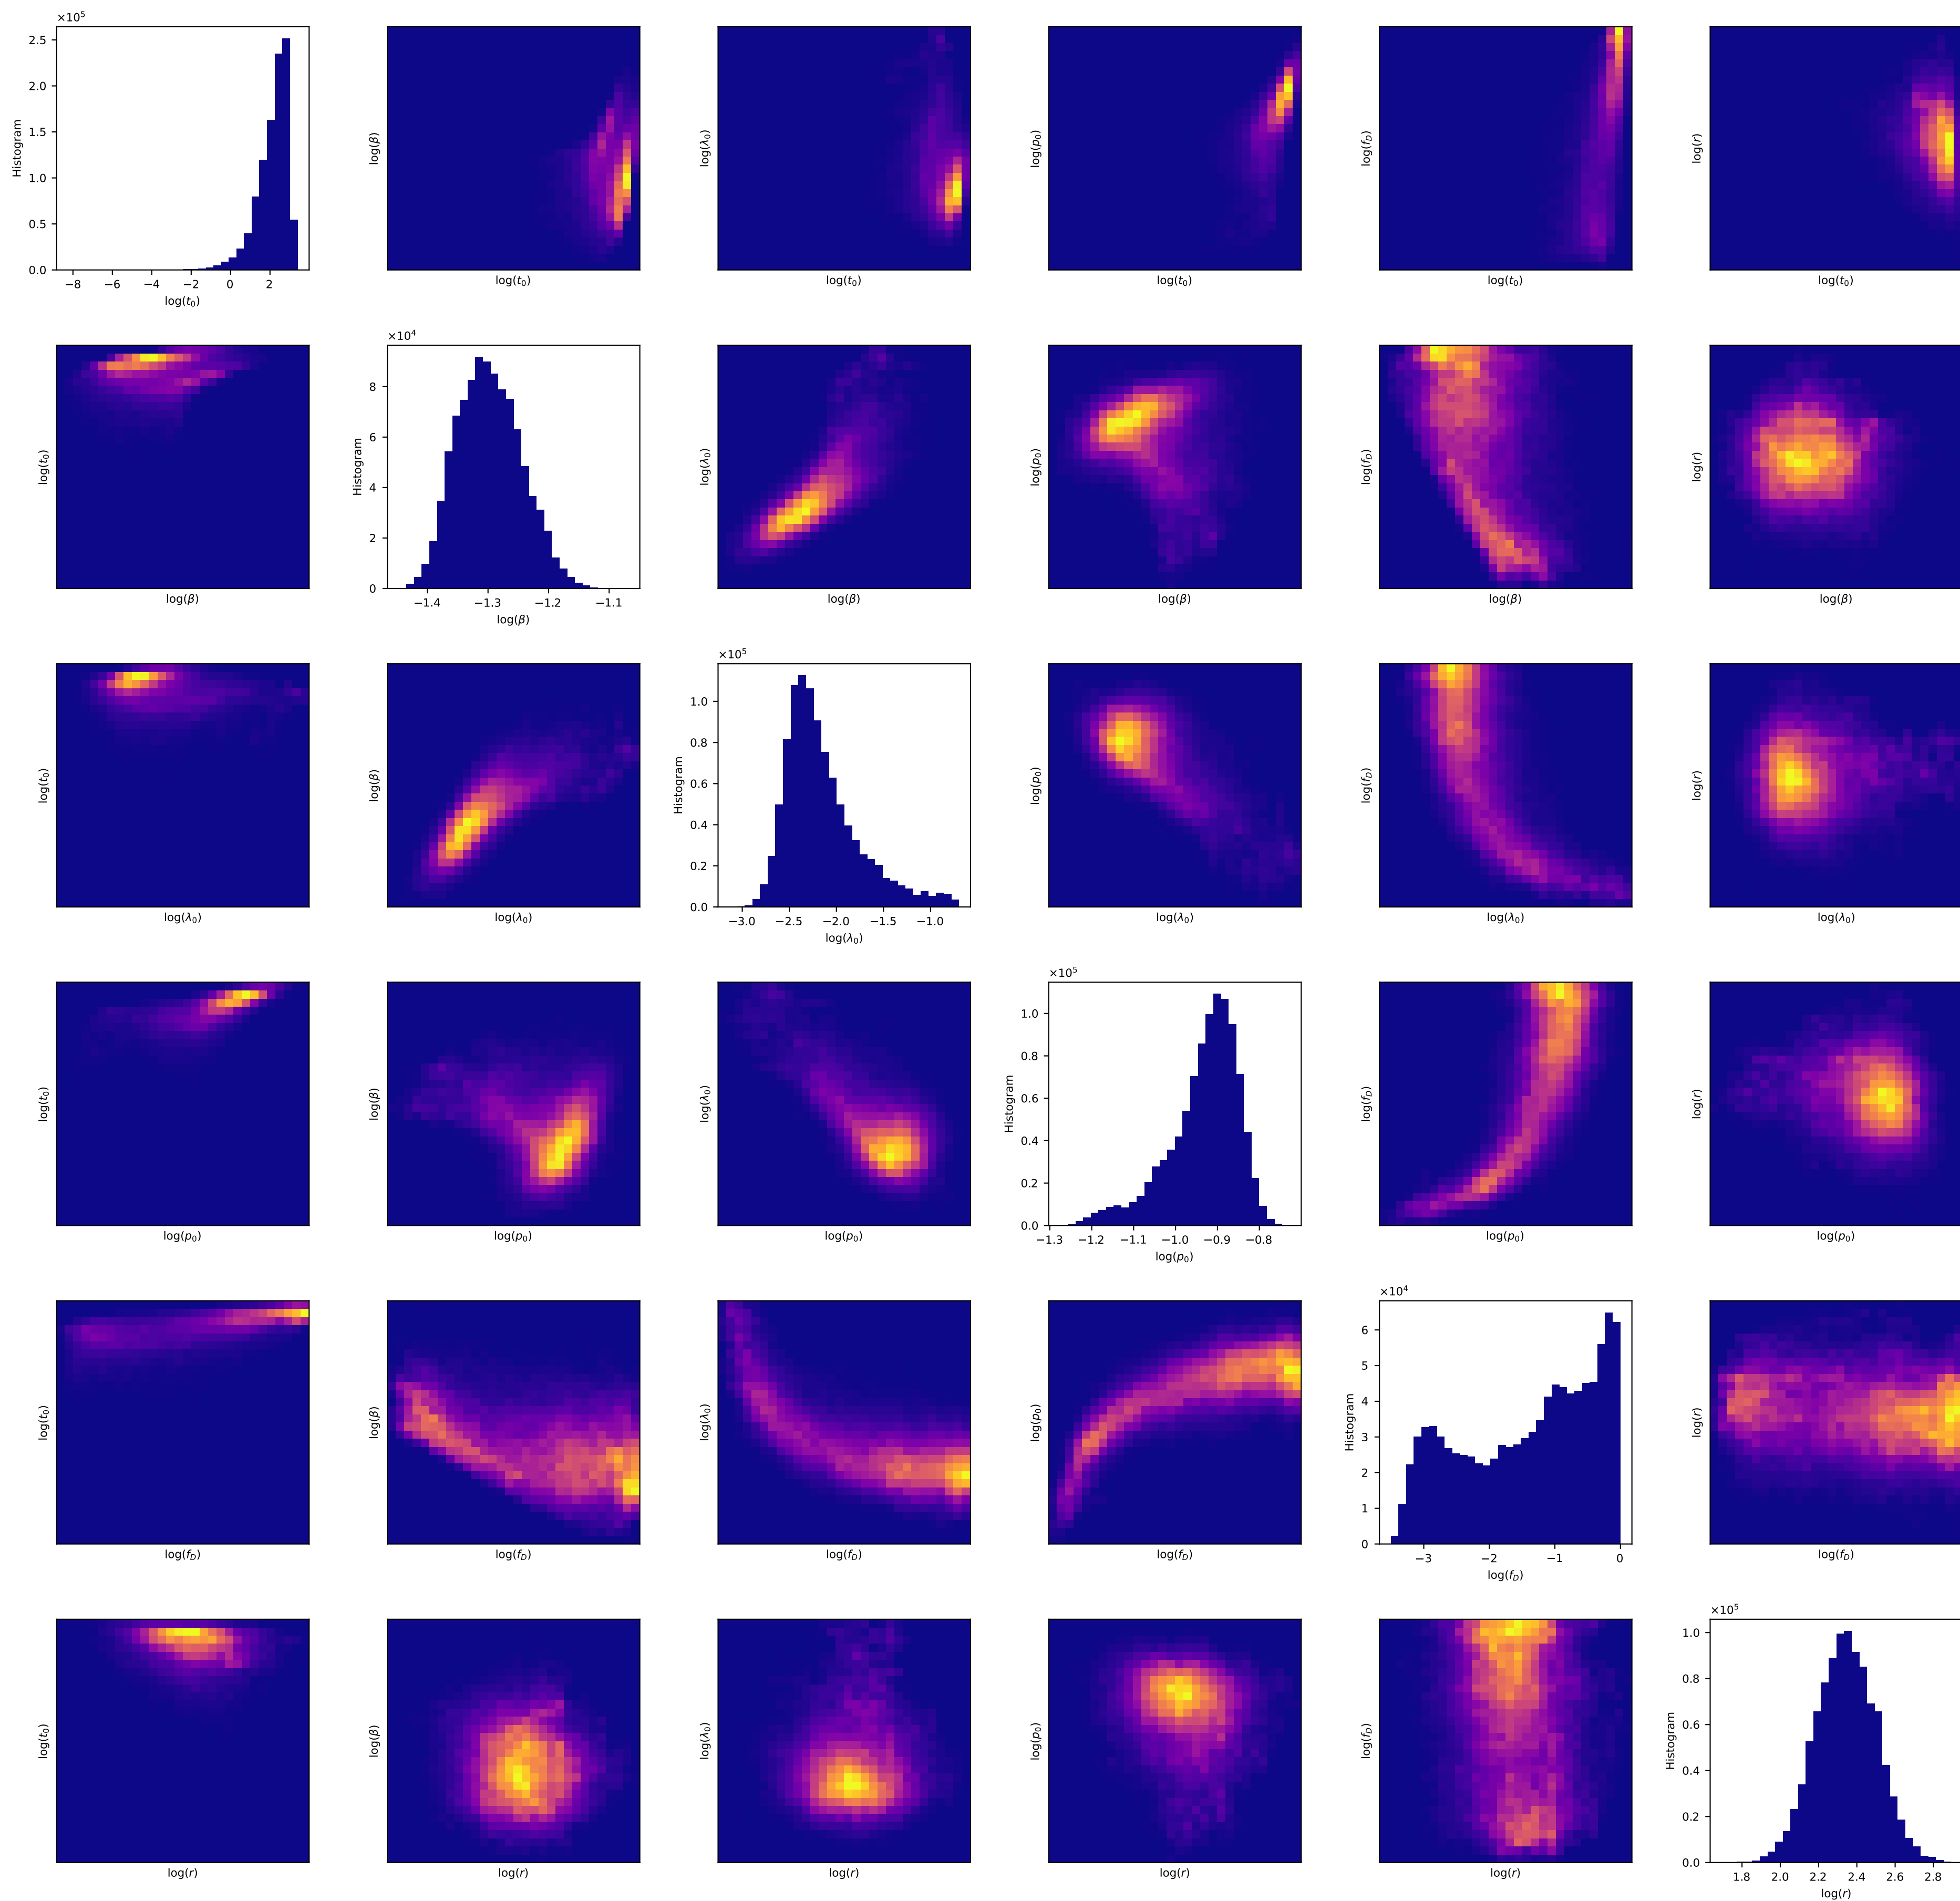

# New York

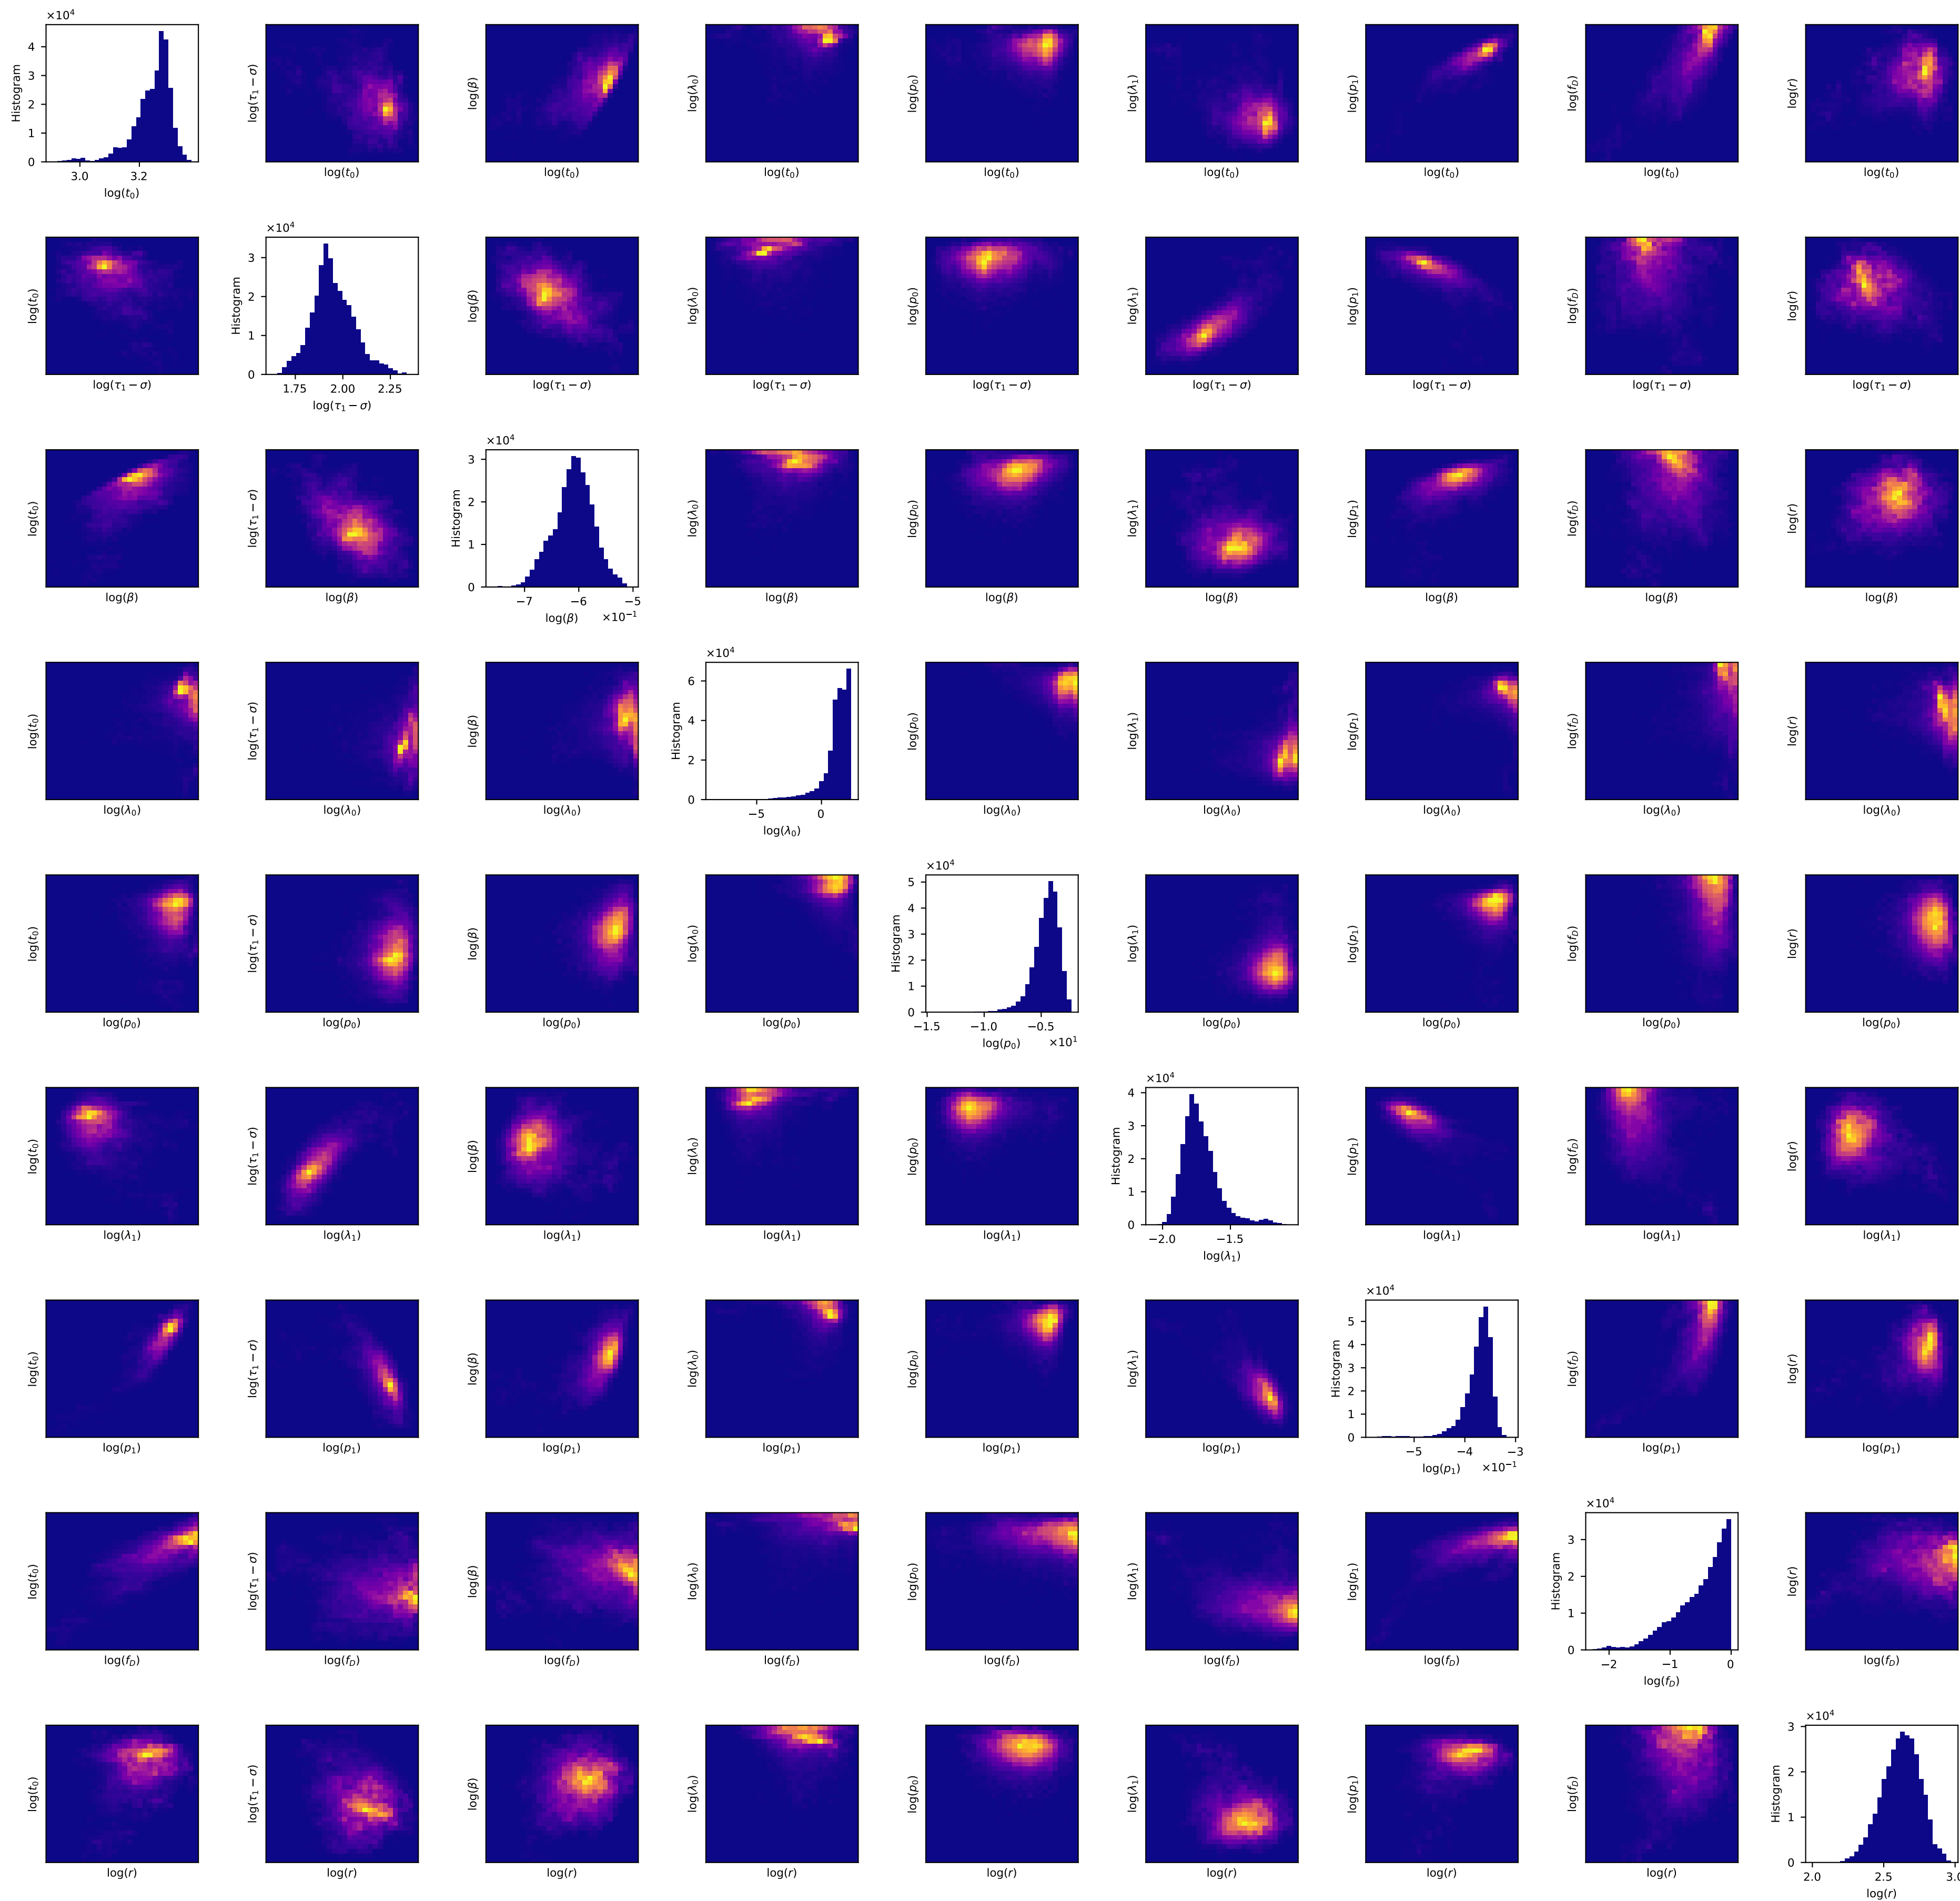

# North Carolina

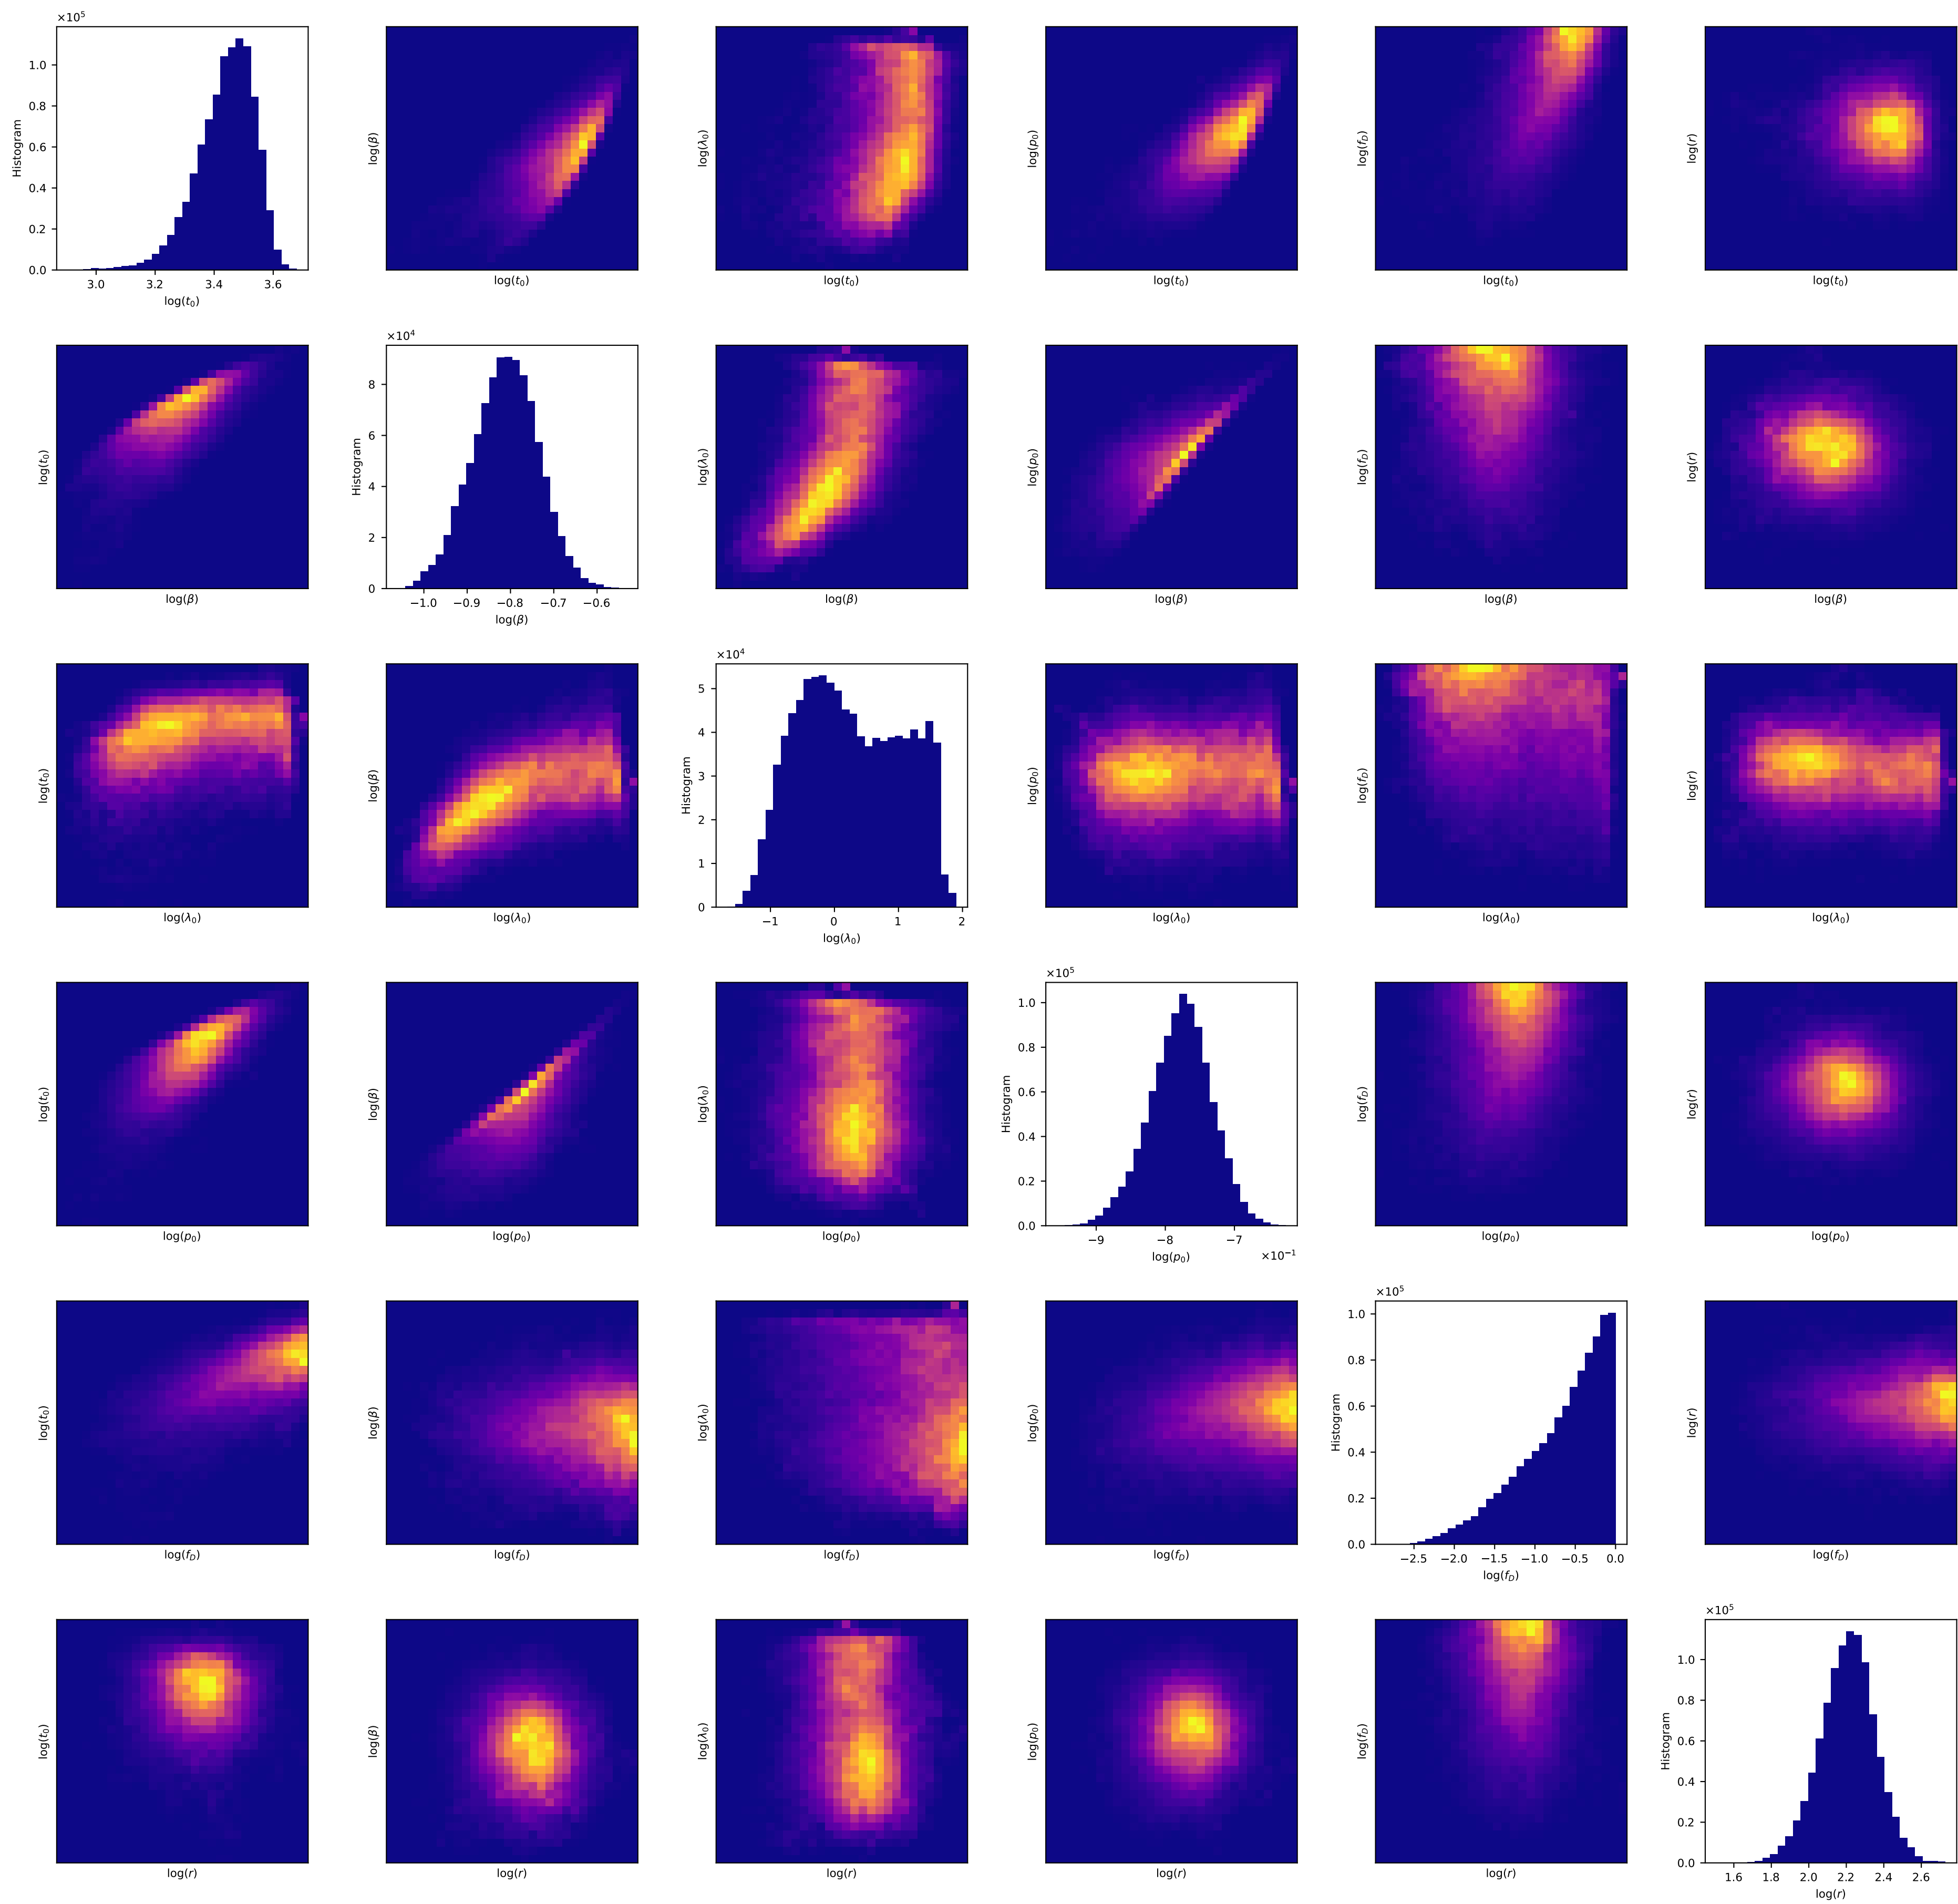

# North Dakota

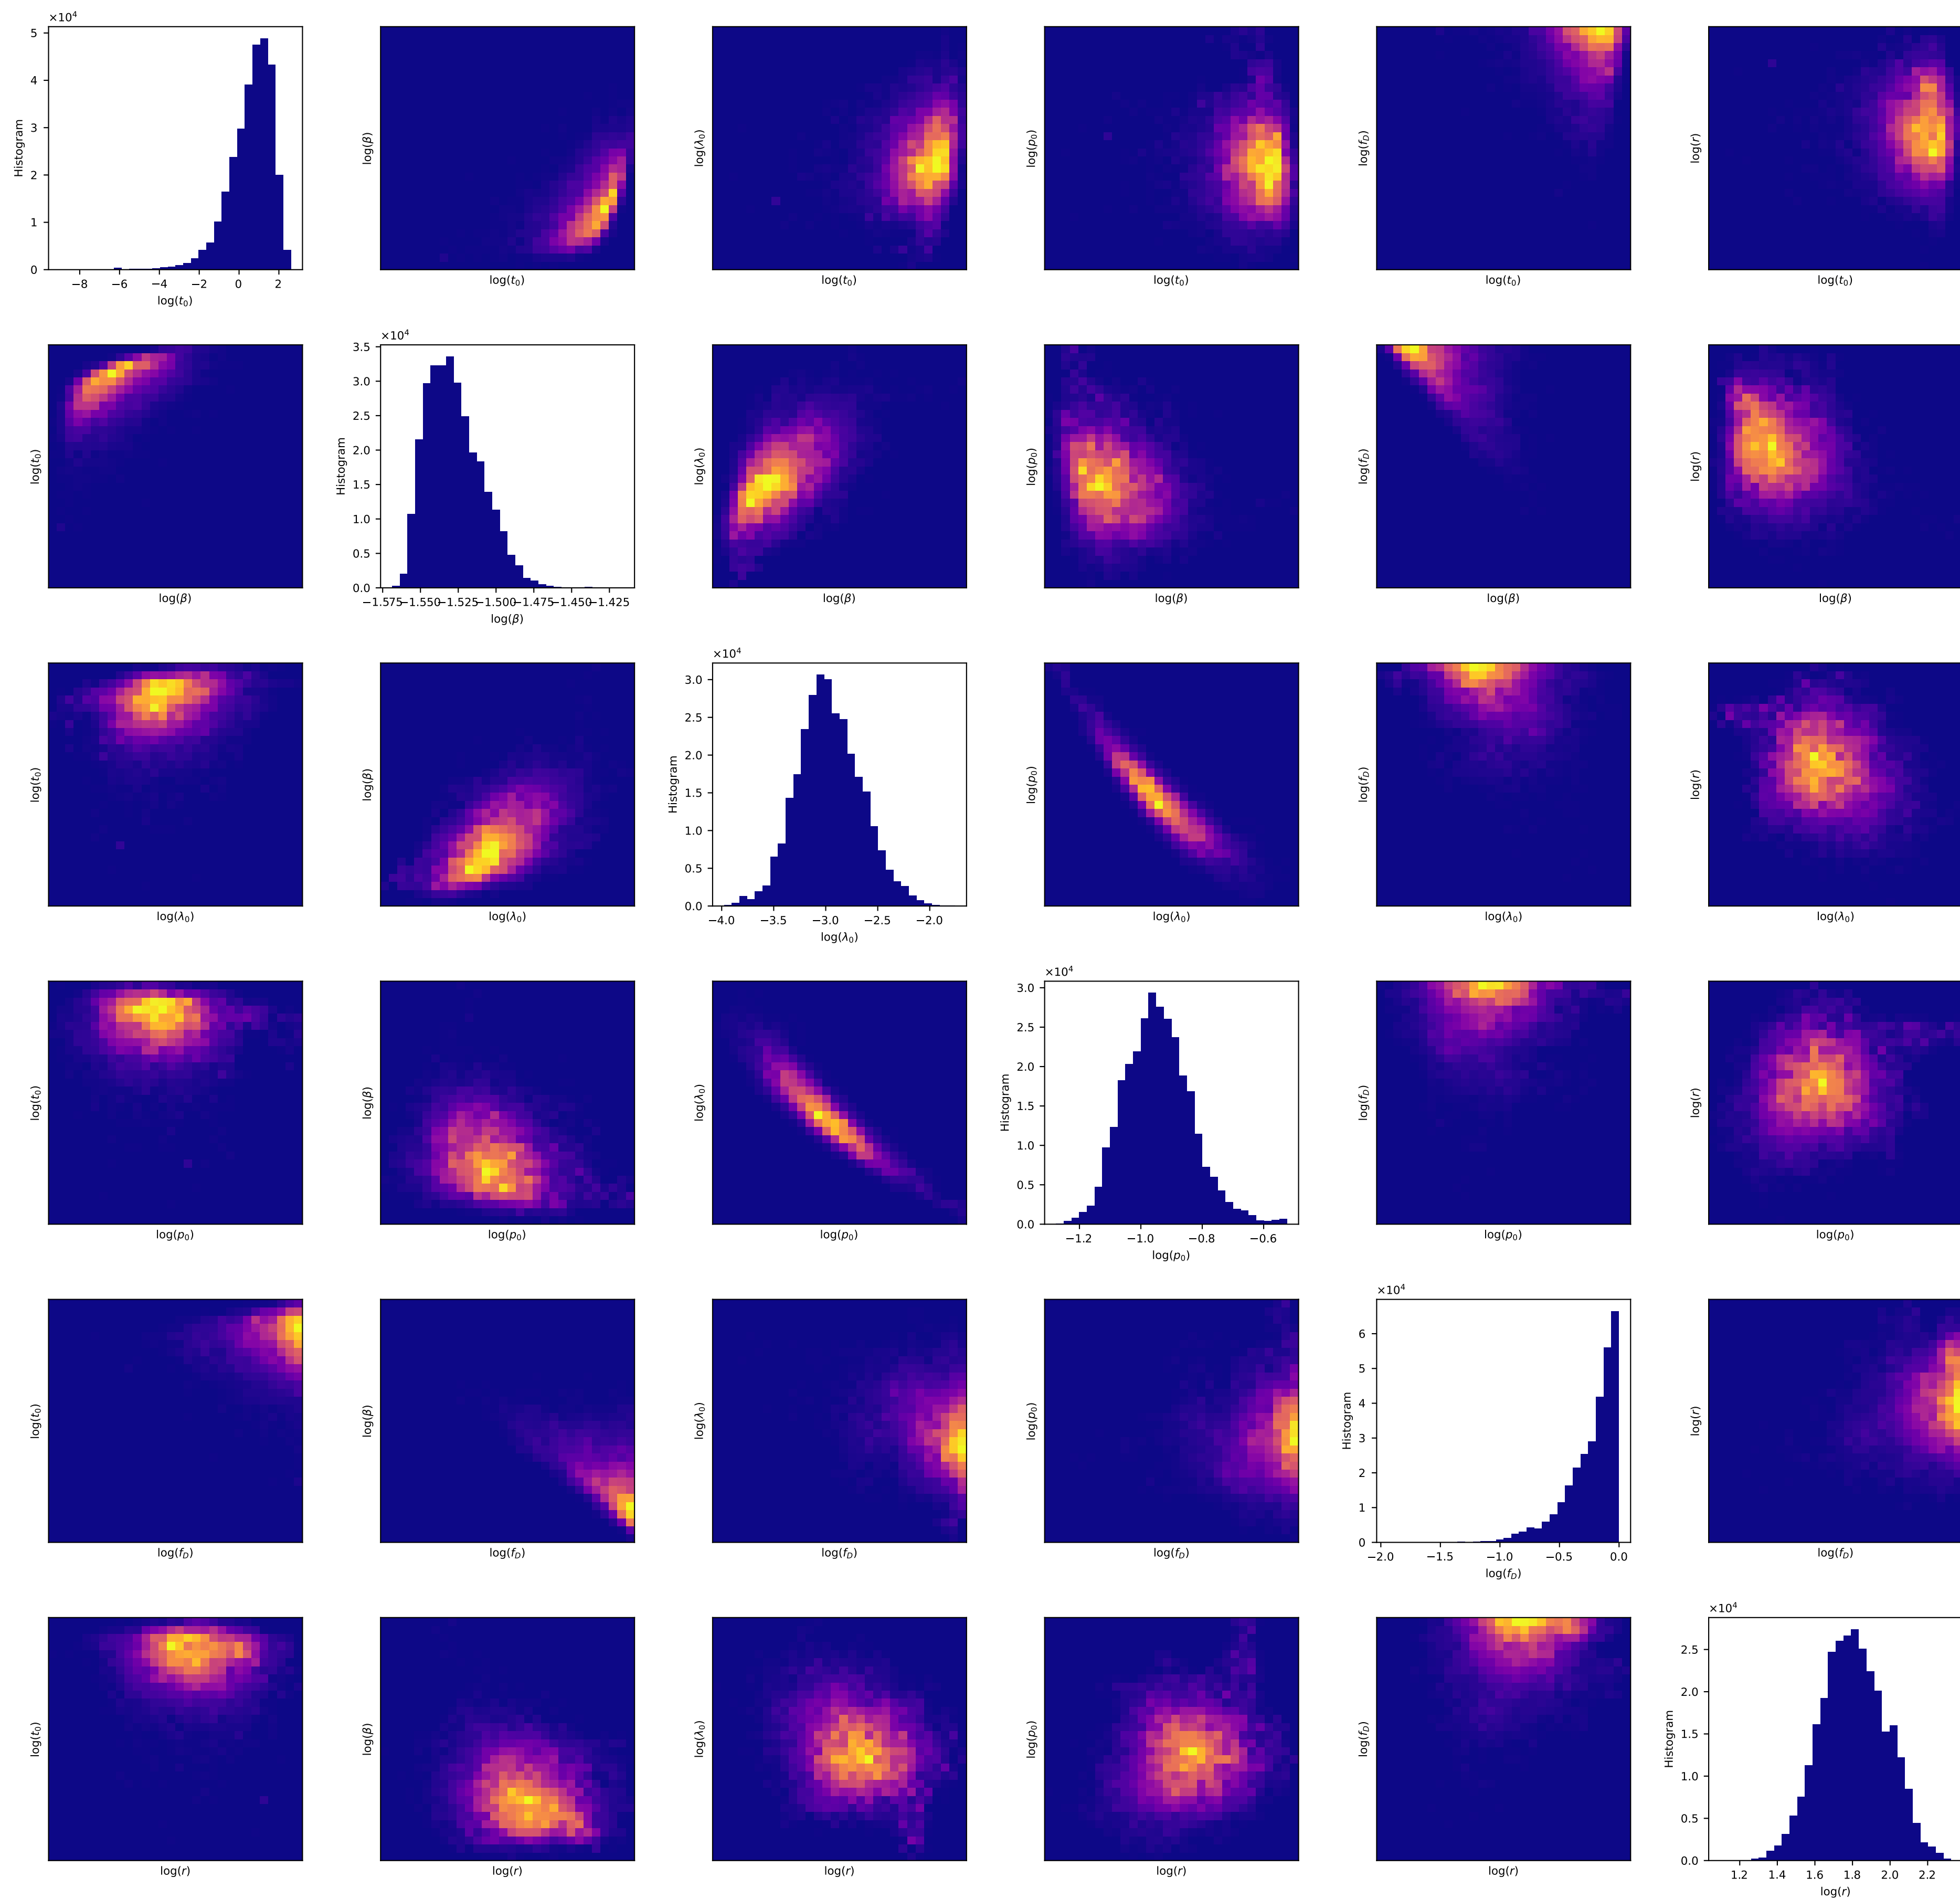



## Ohio

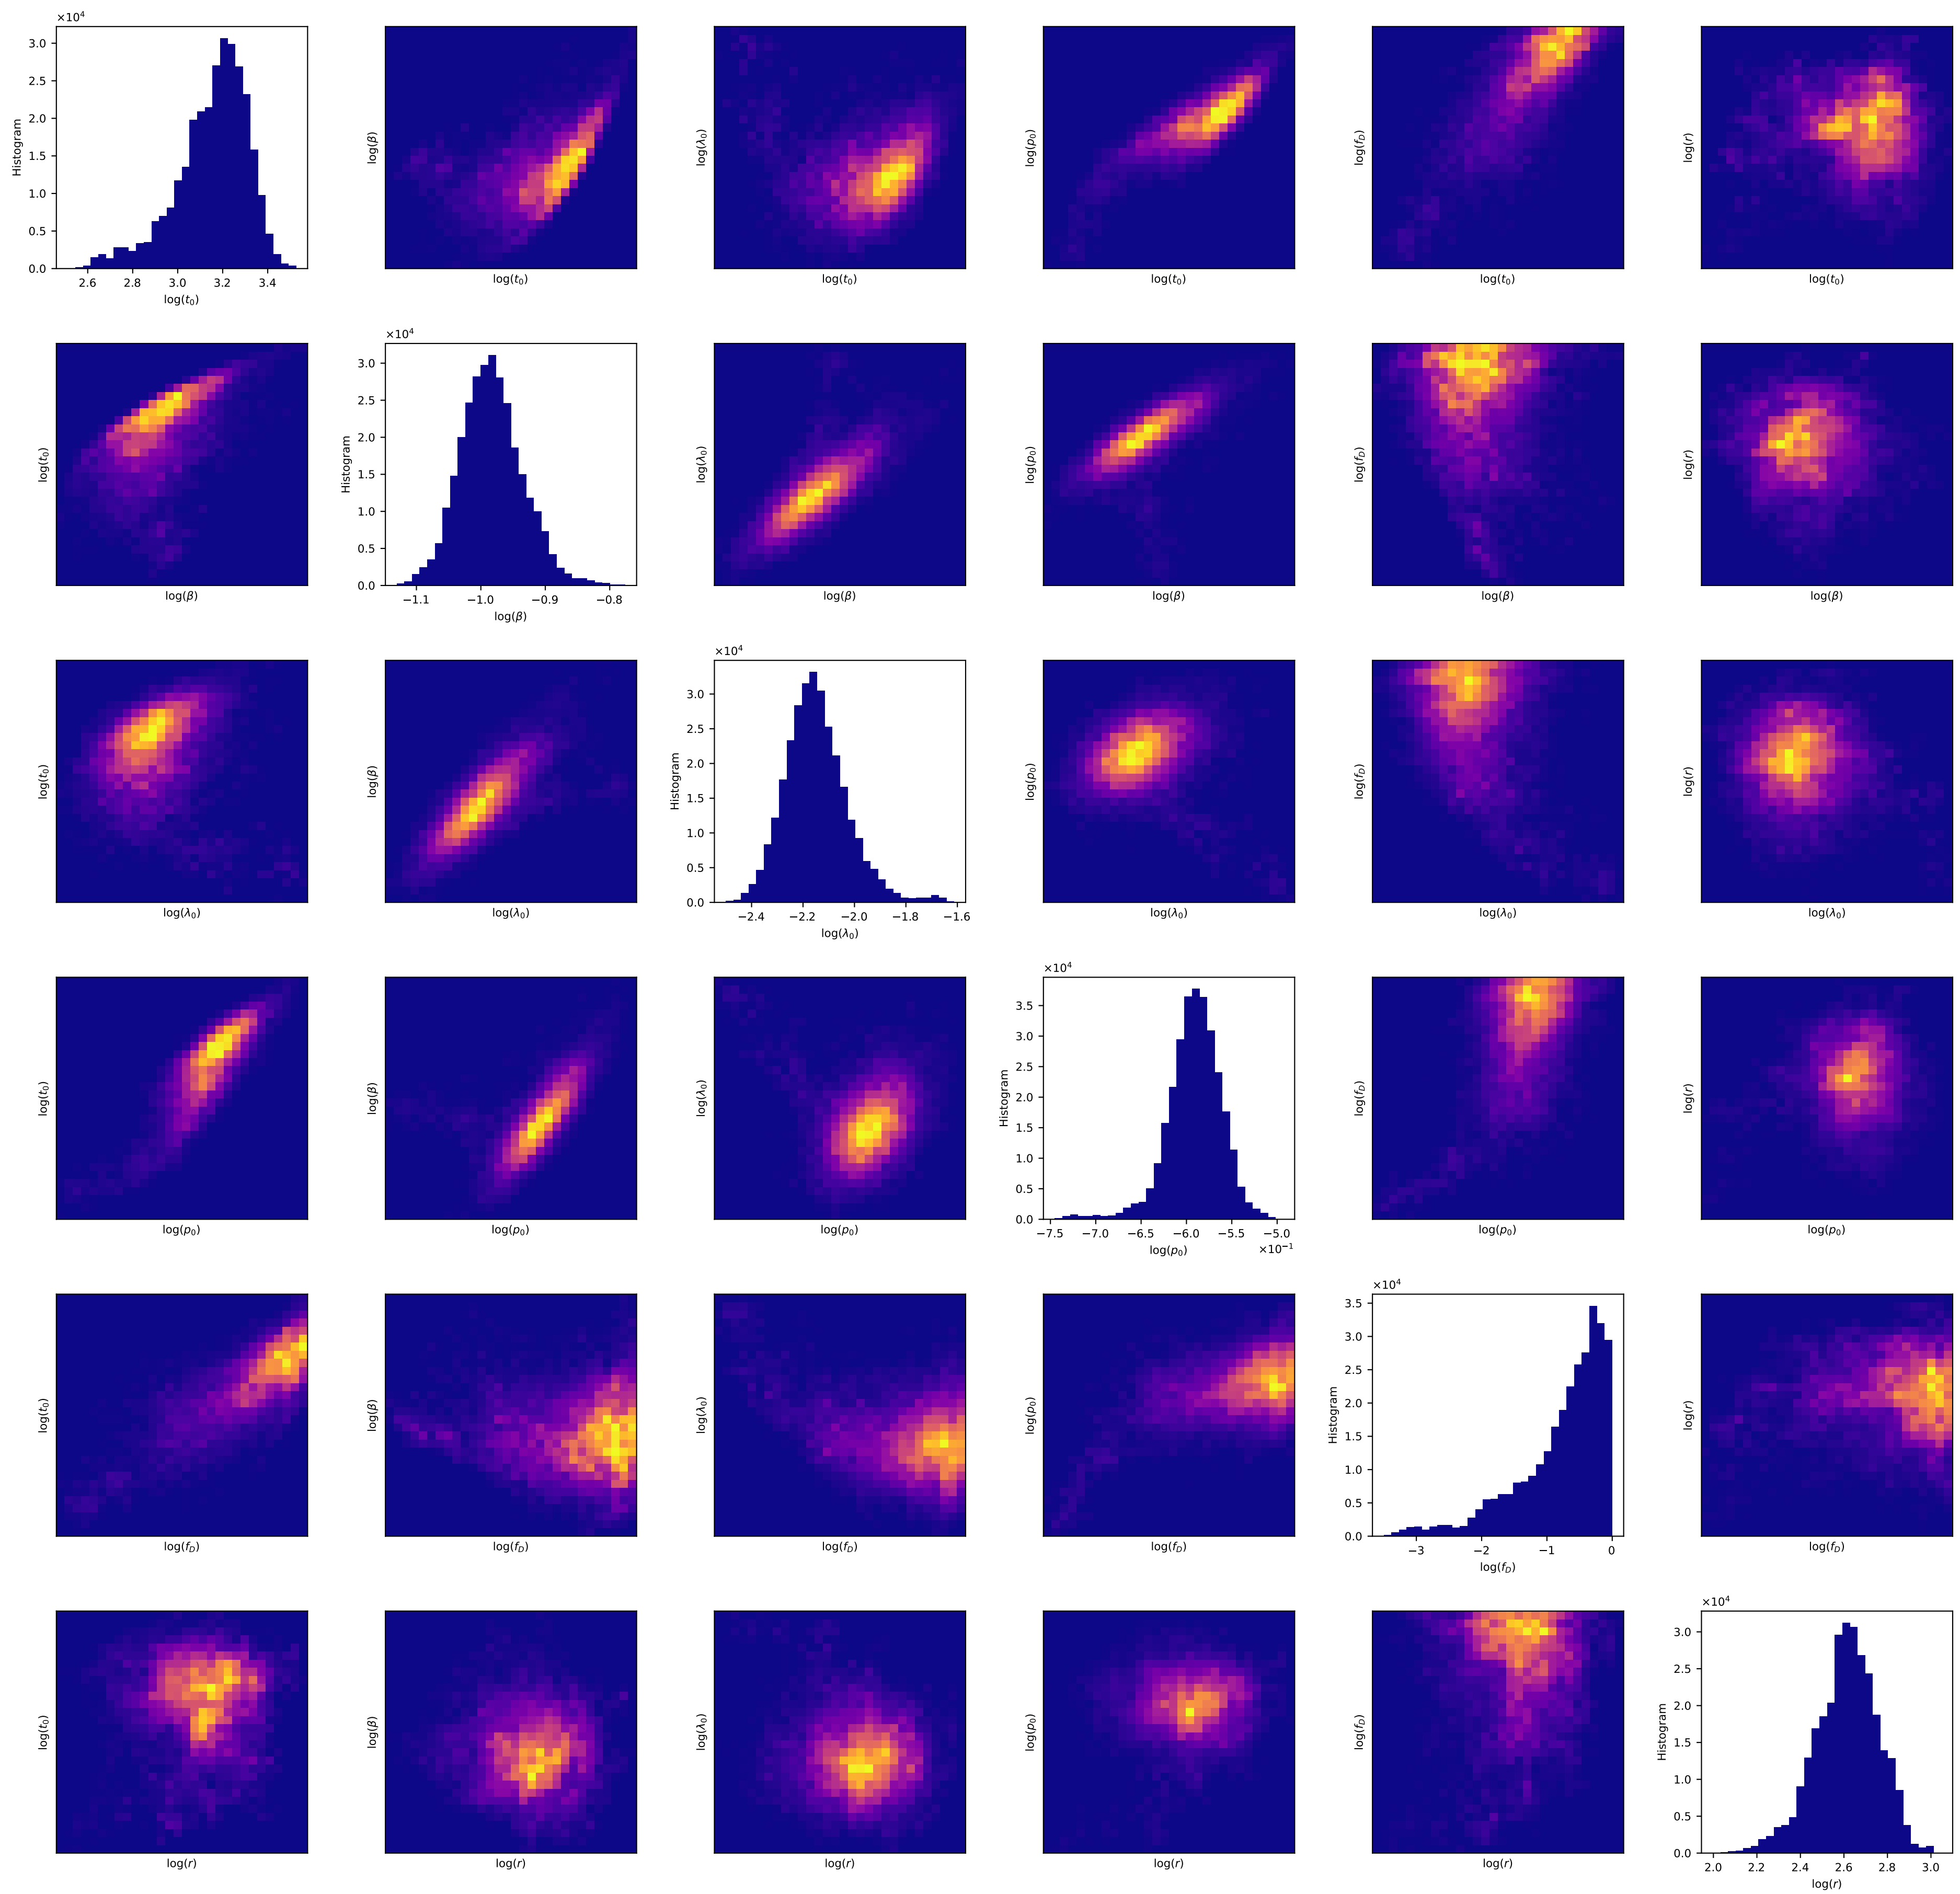

# Oklahoma

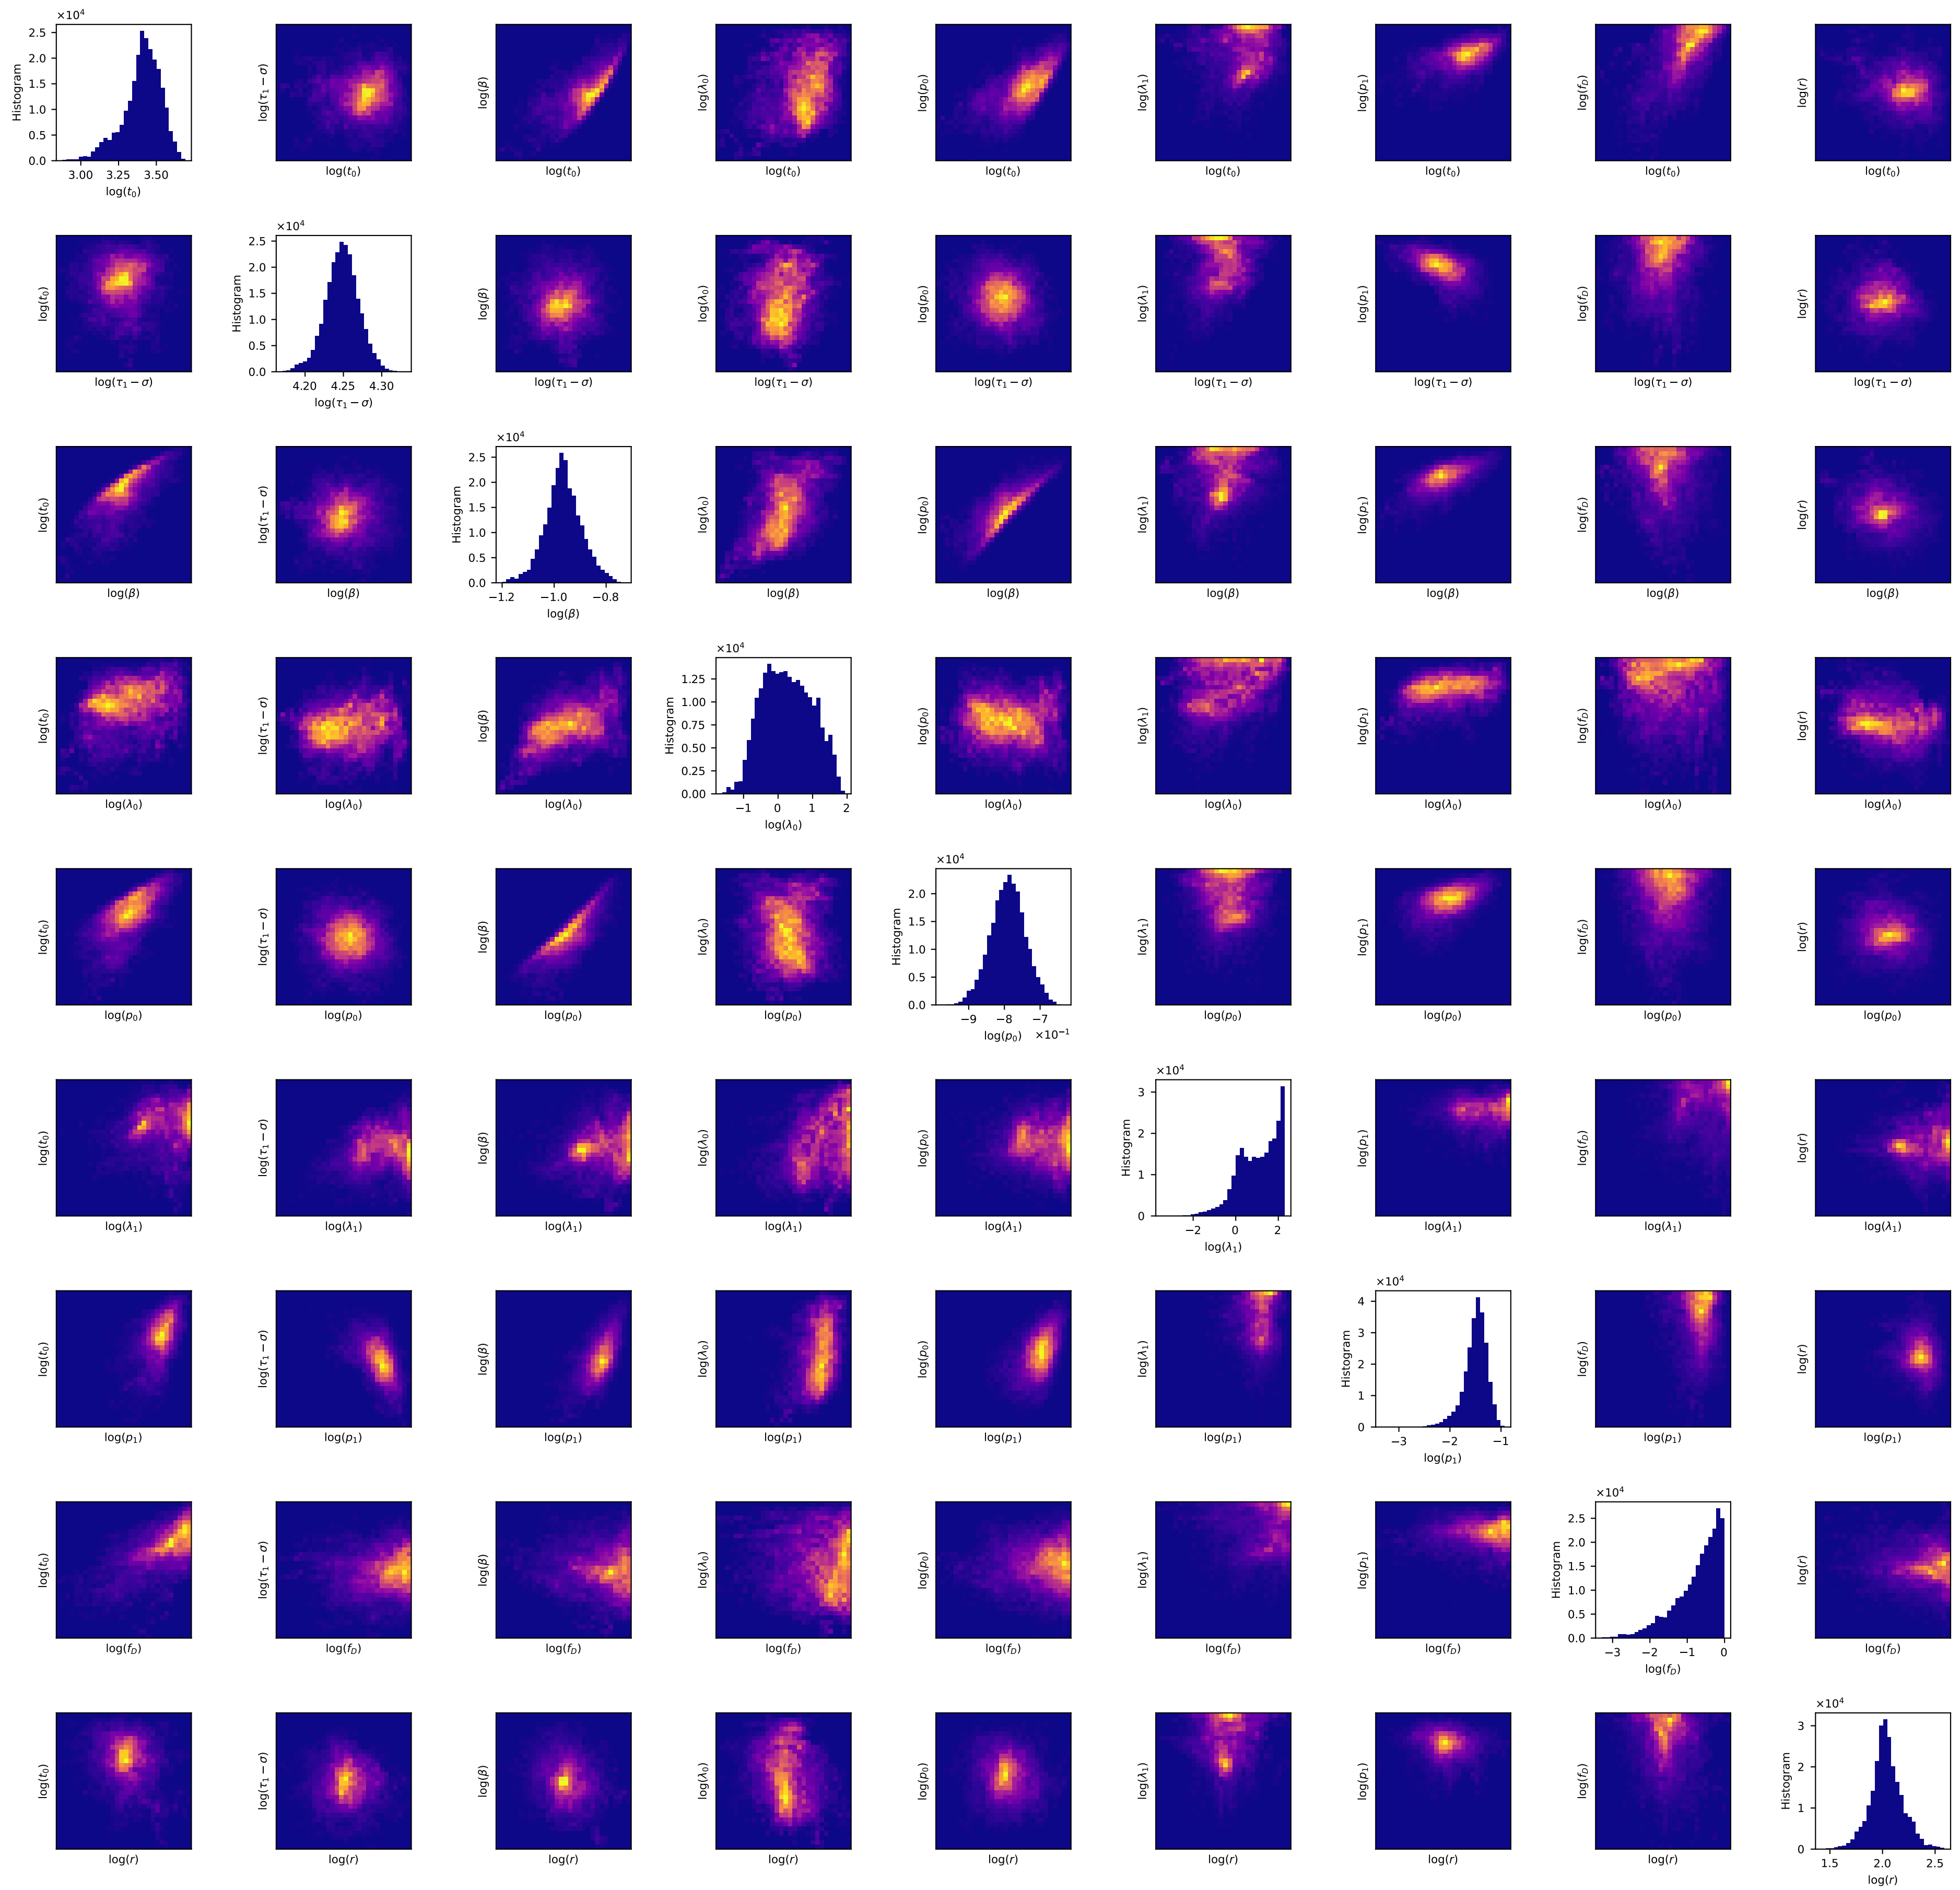

# Oregon

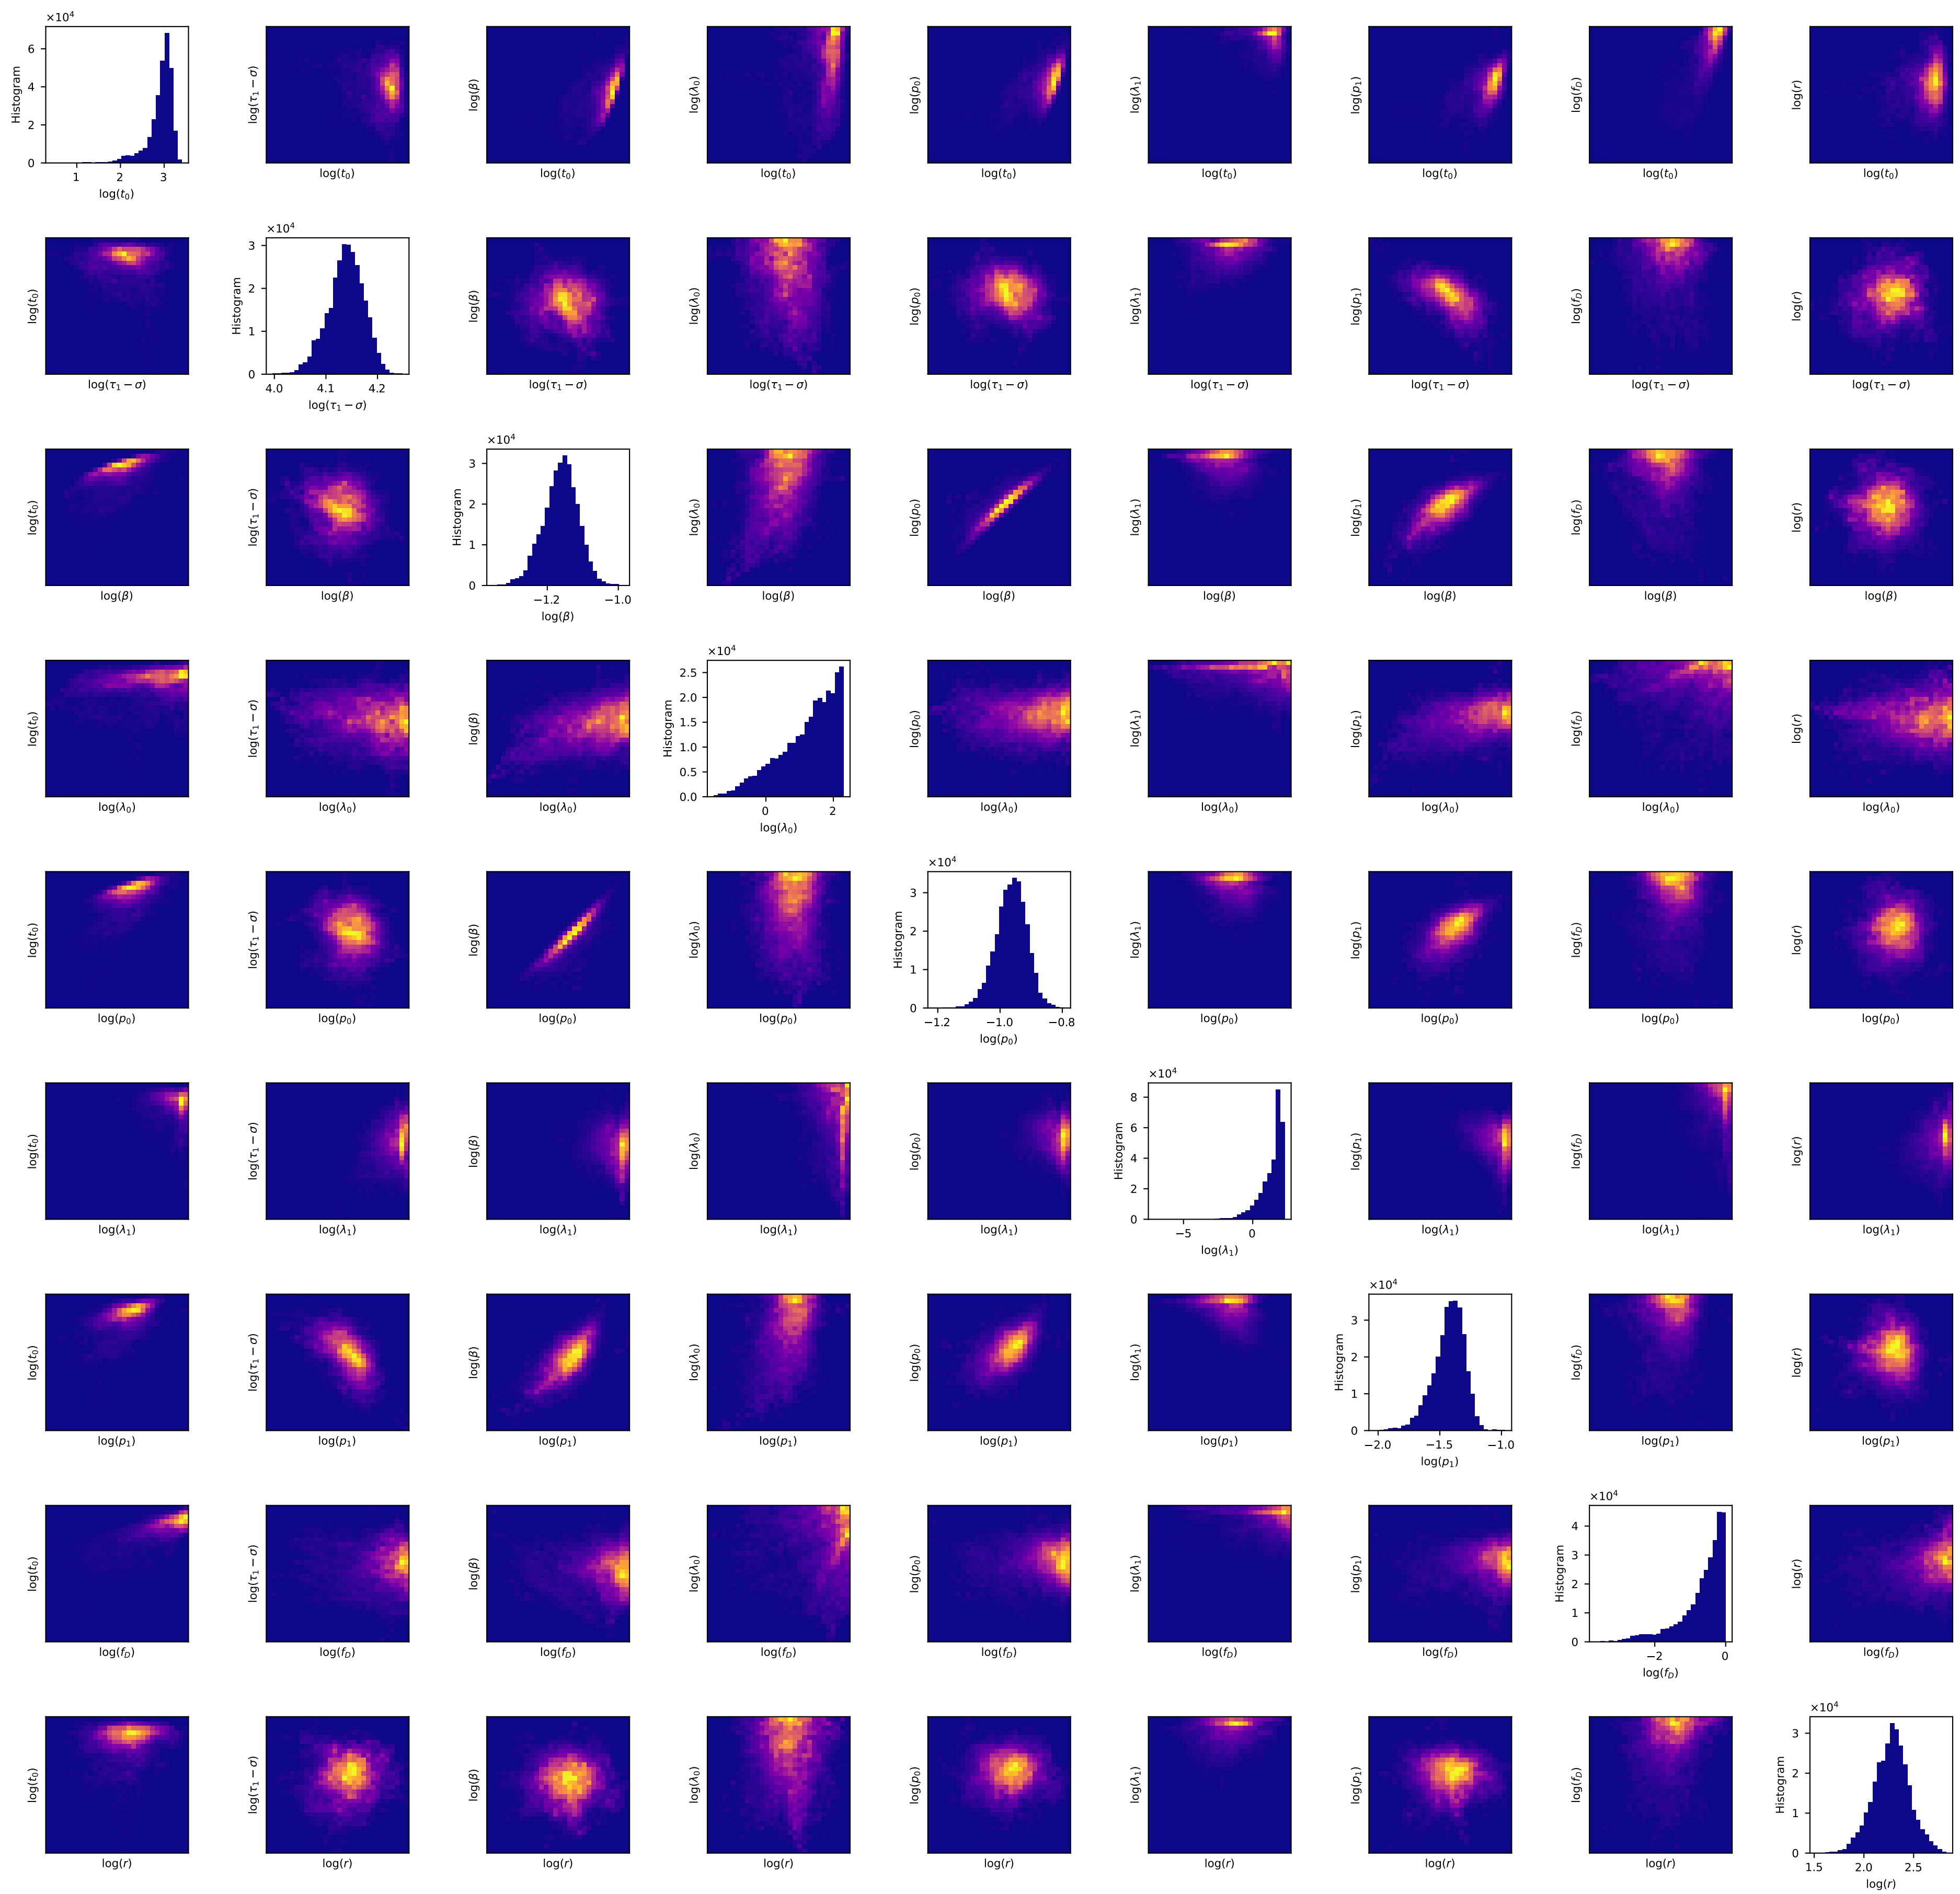

# Pennsylvania

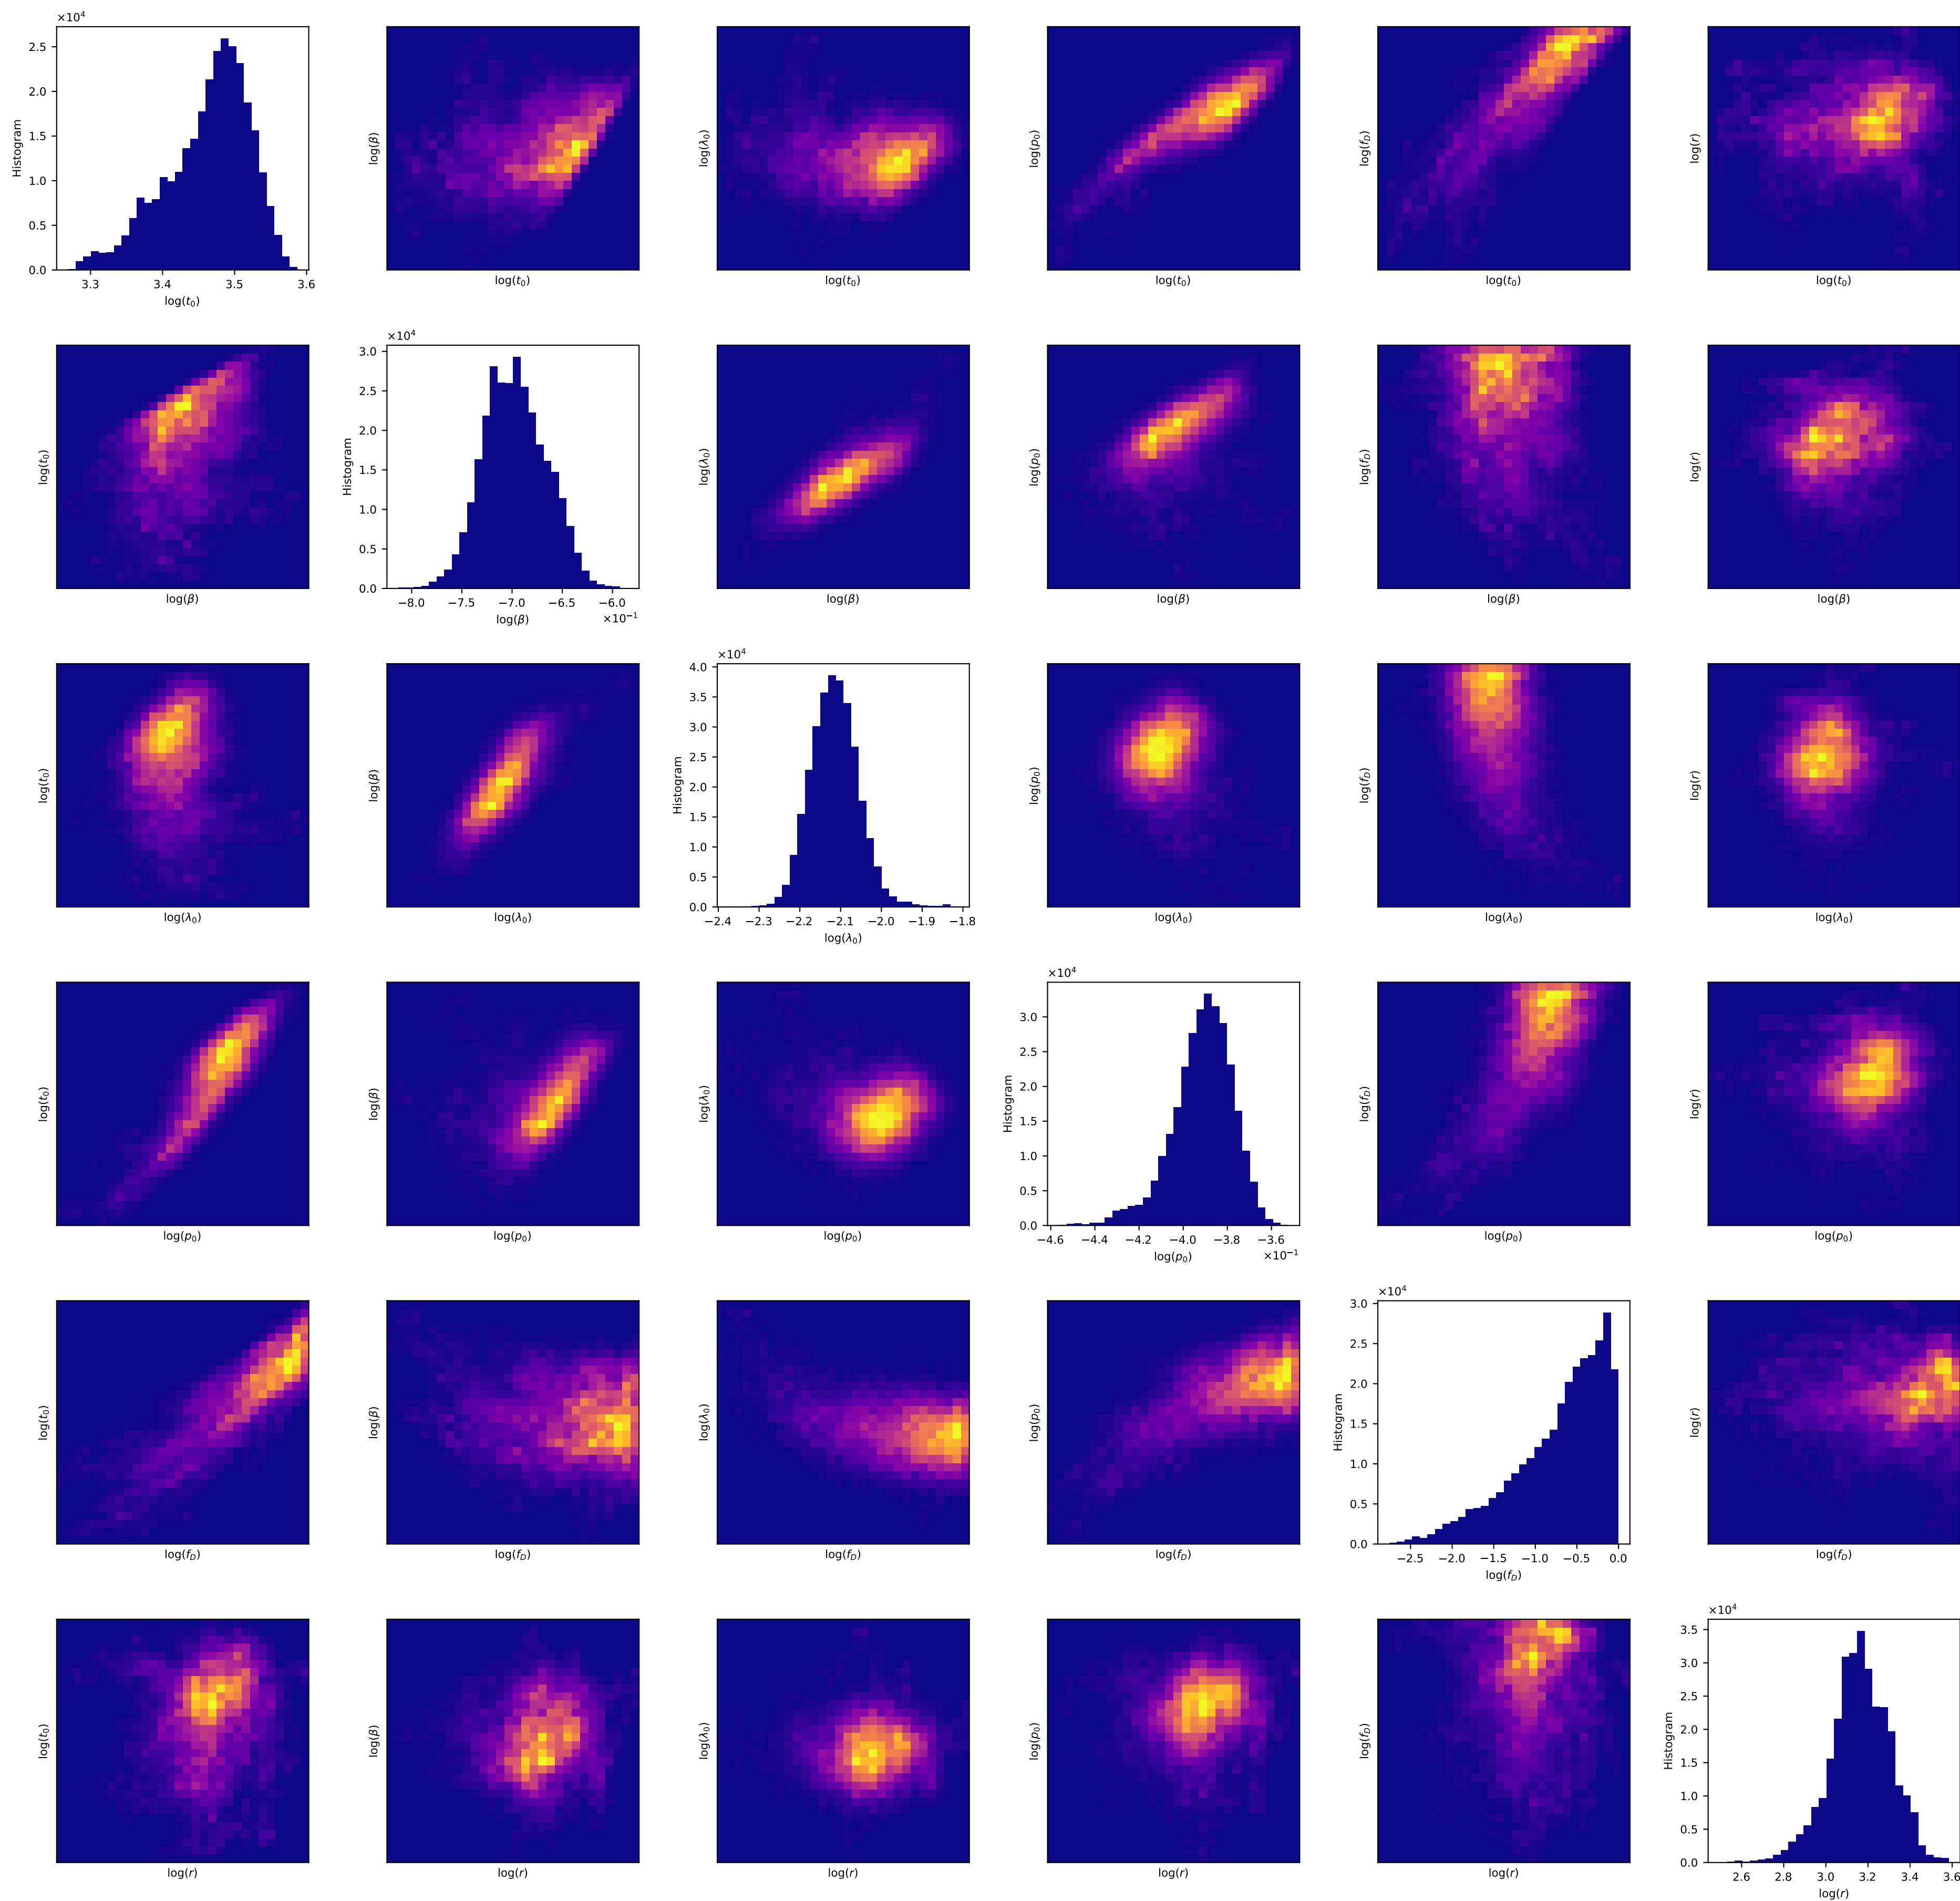

# Rhode Island

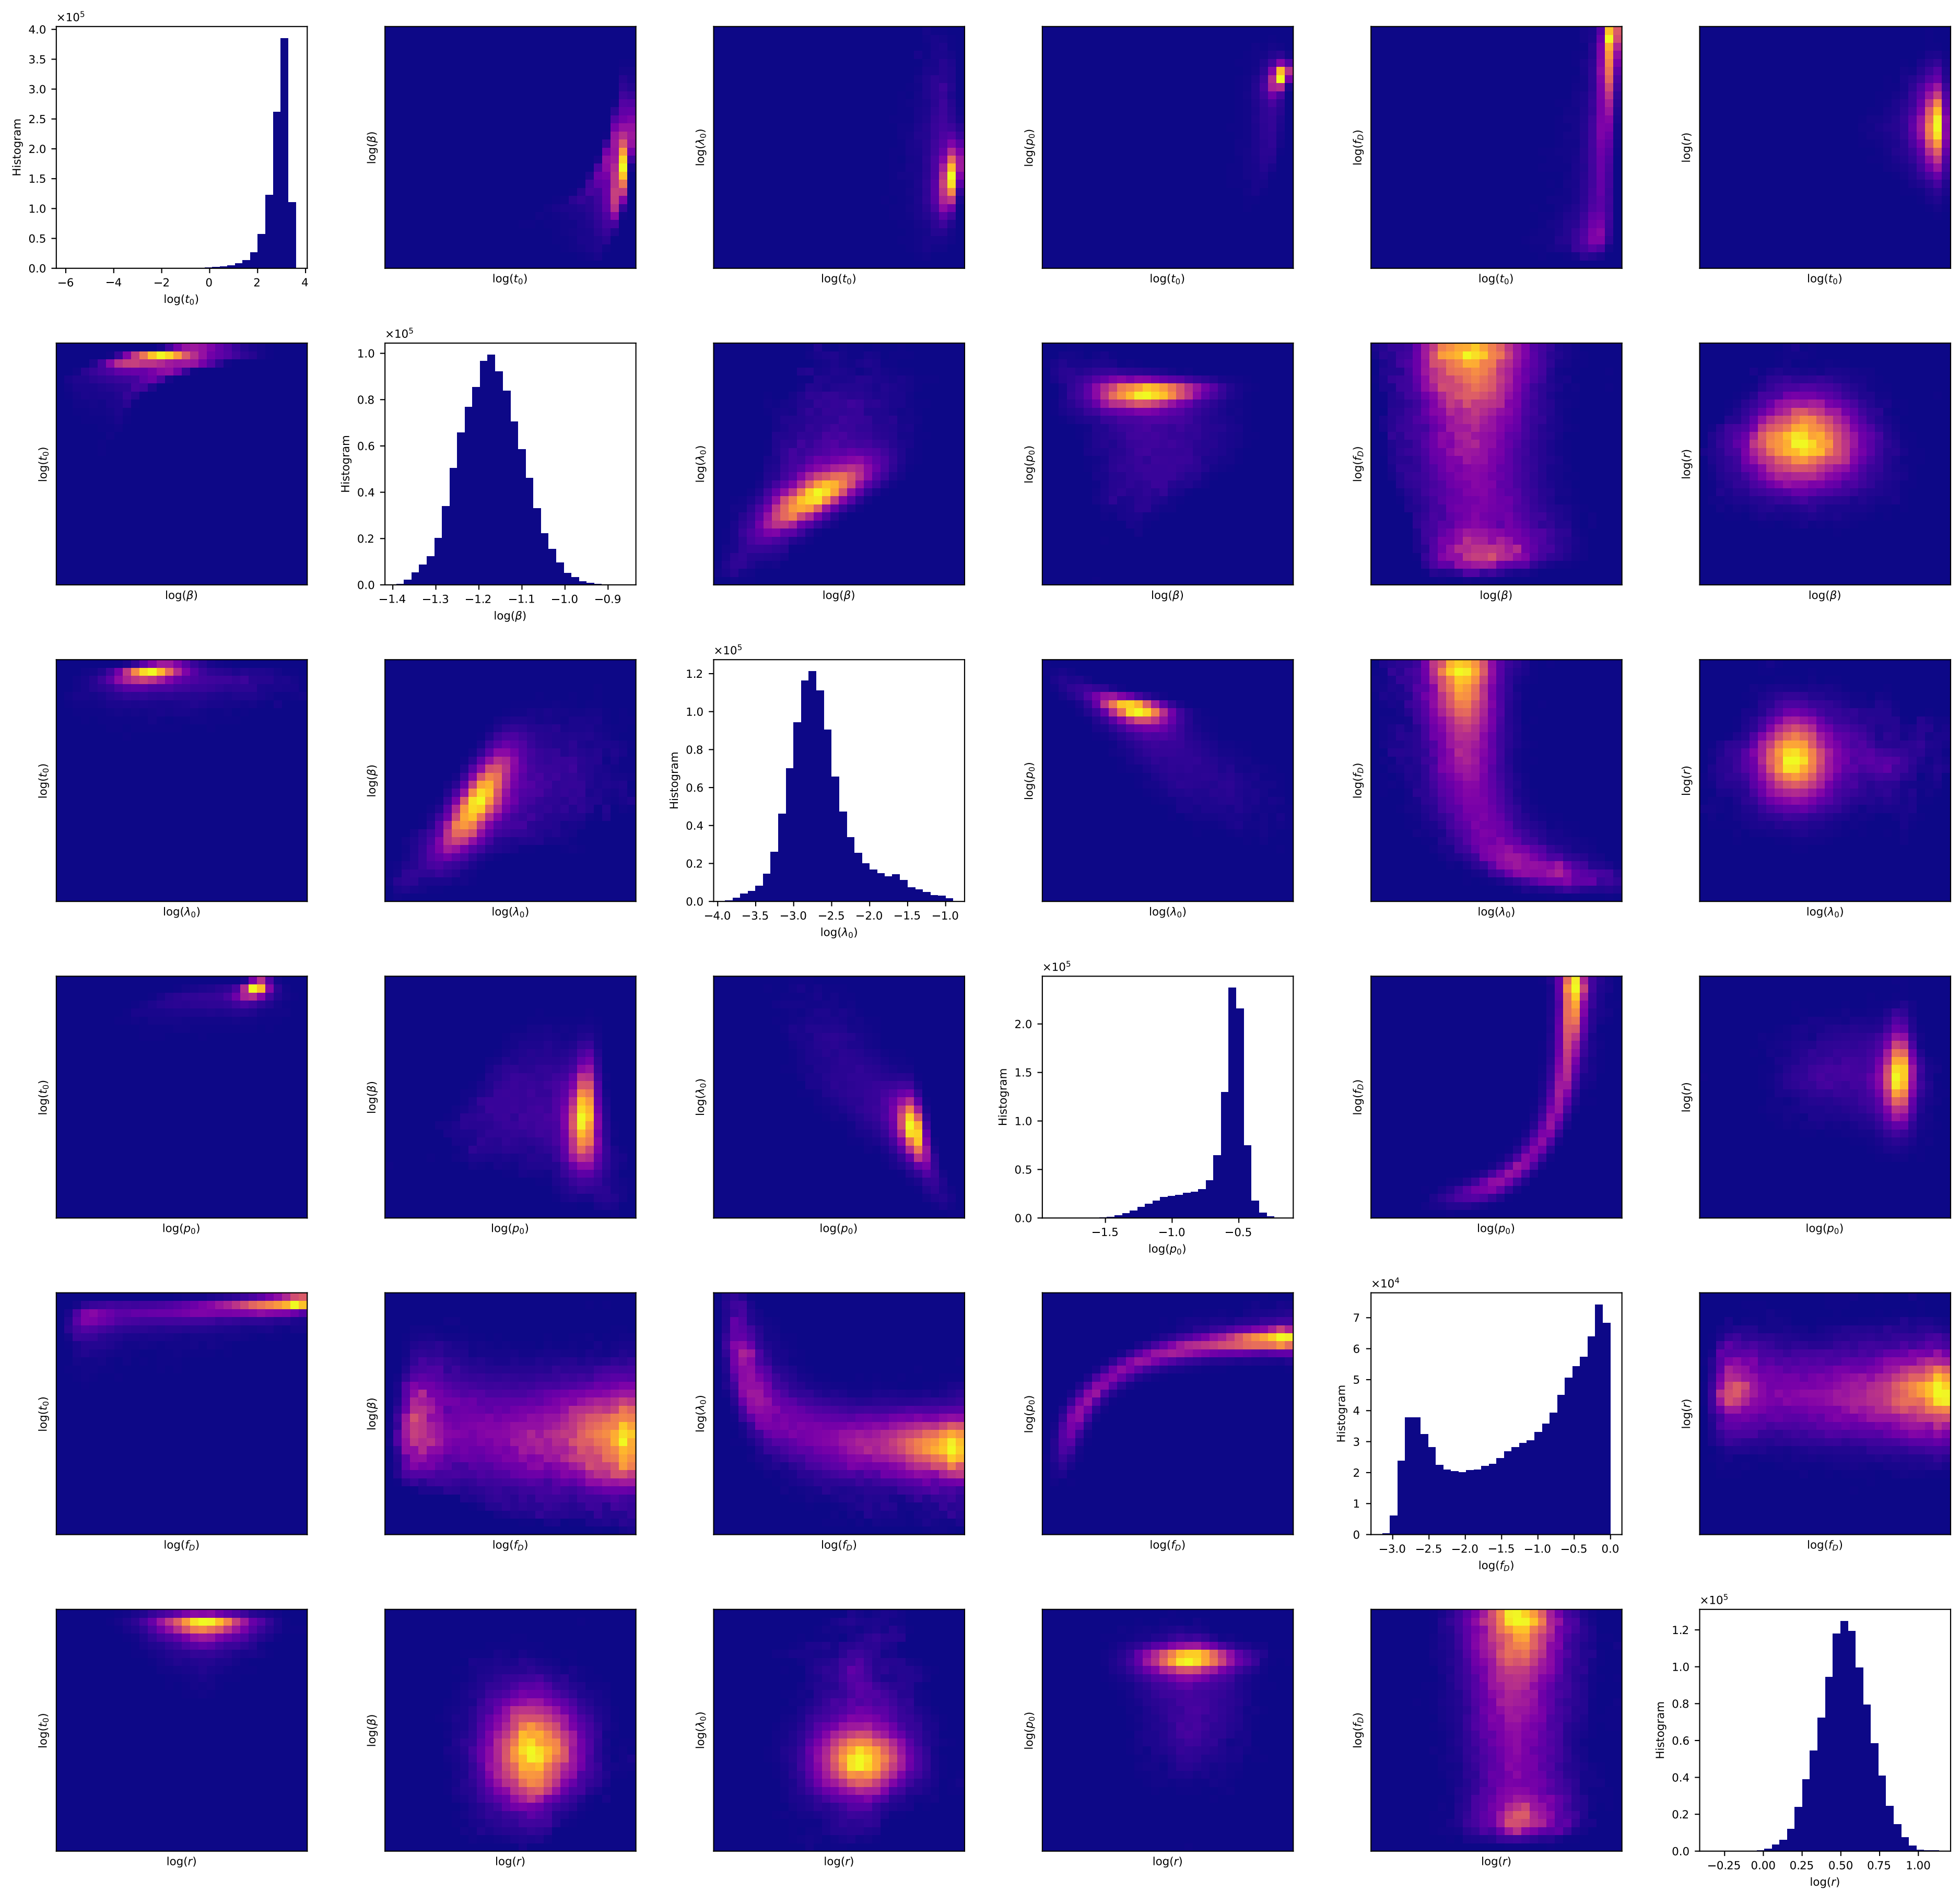

# South Carolina

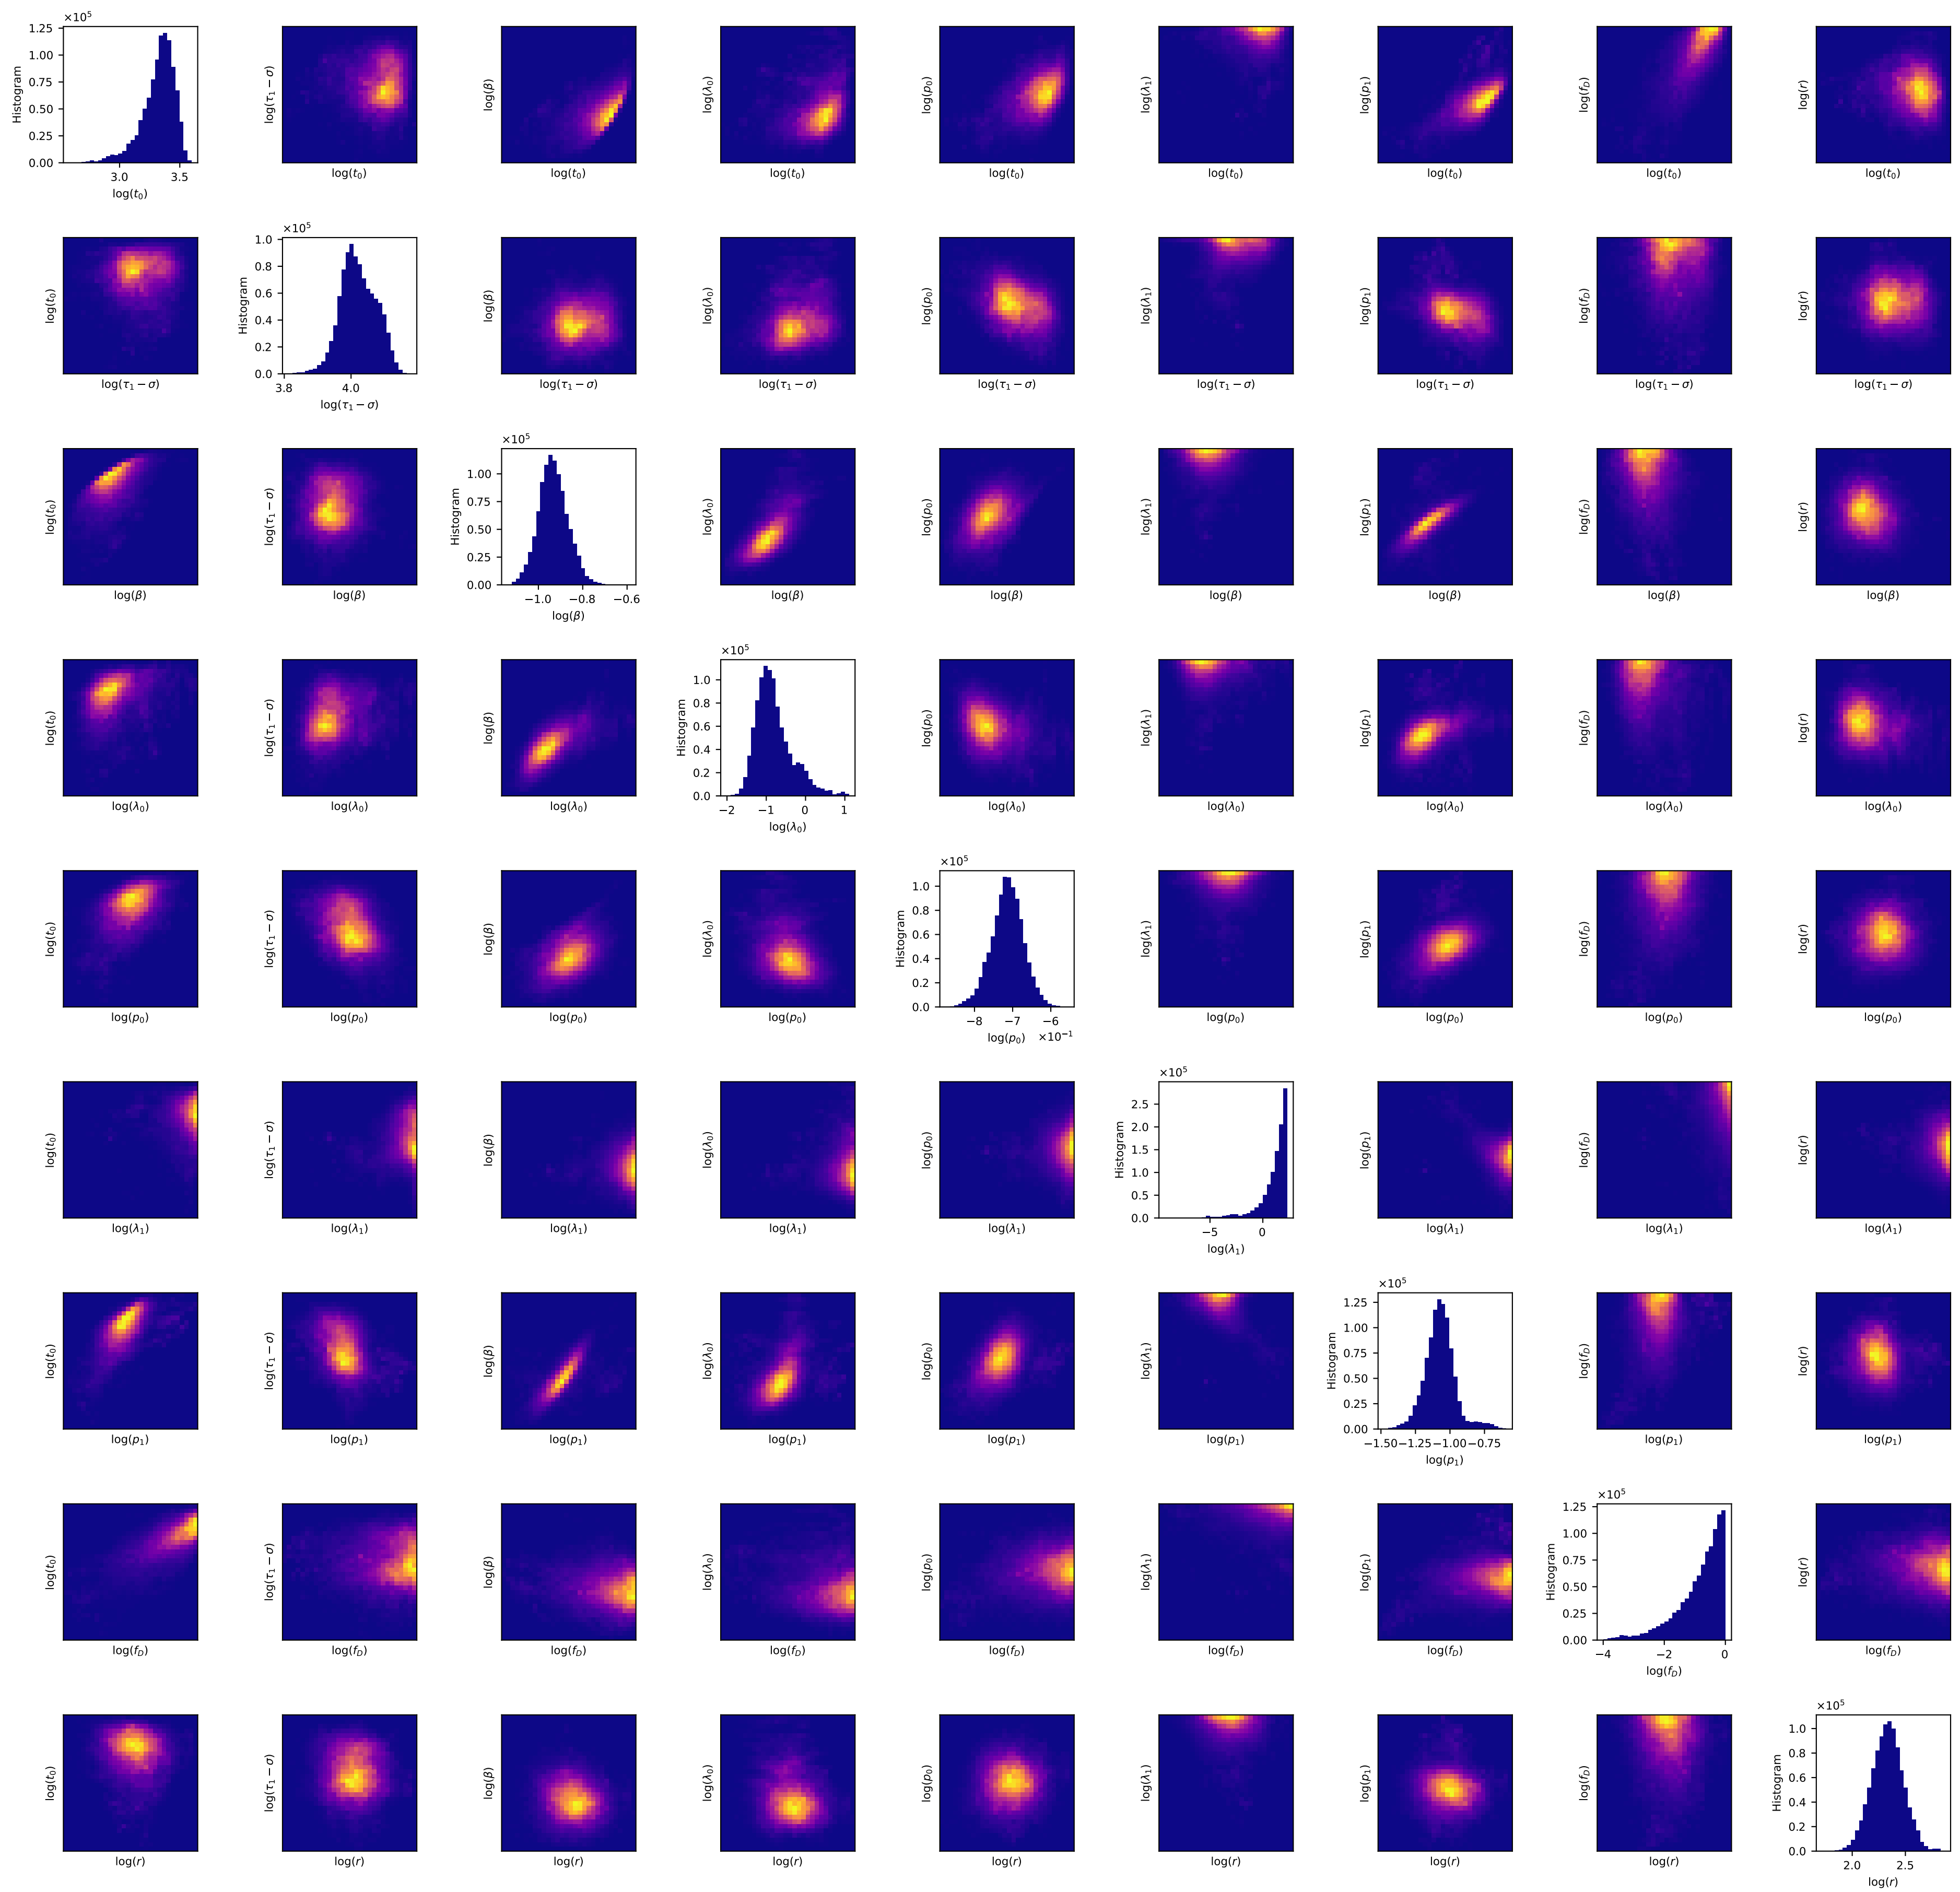

# South Dakota

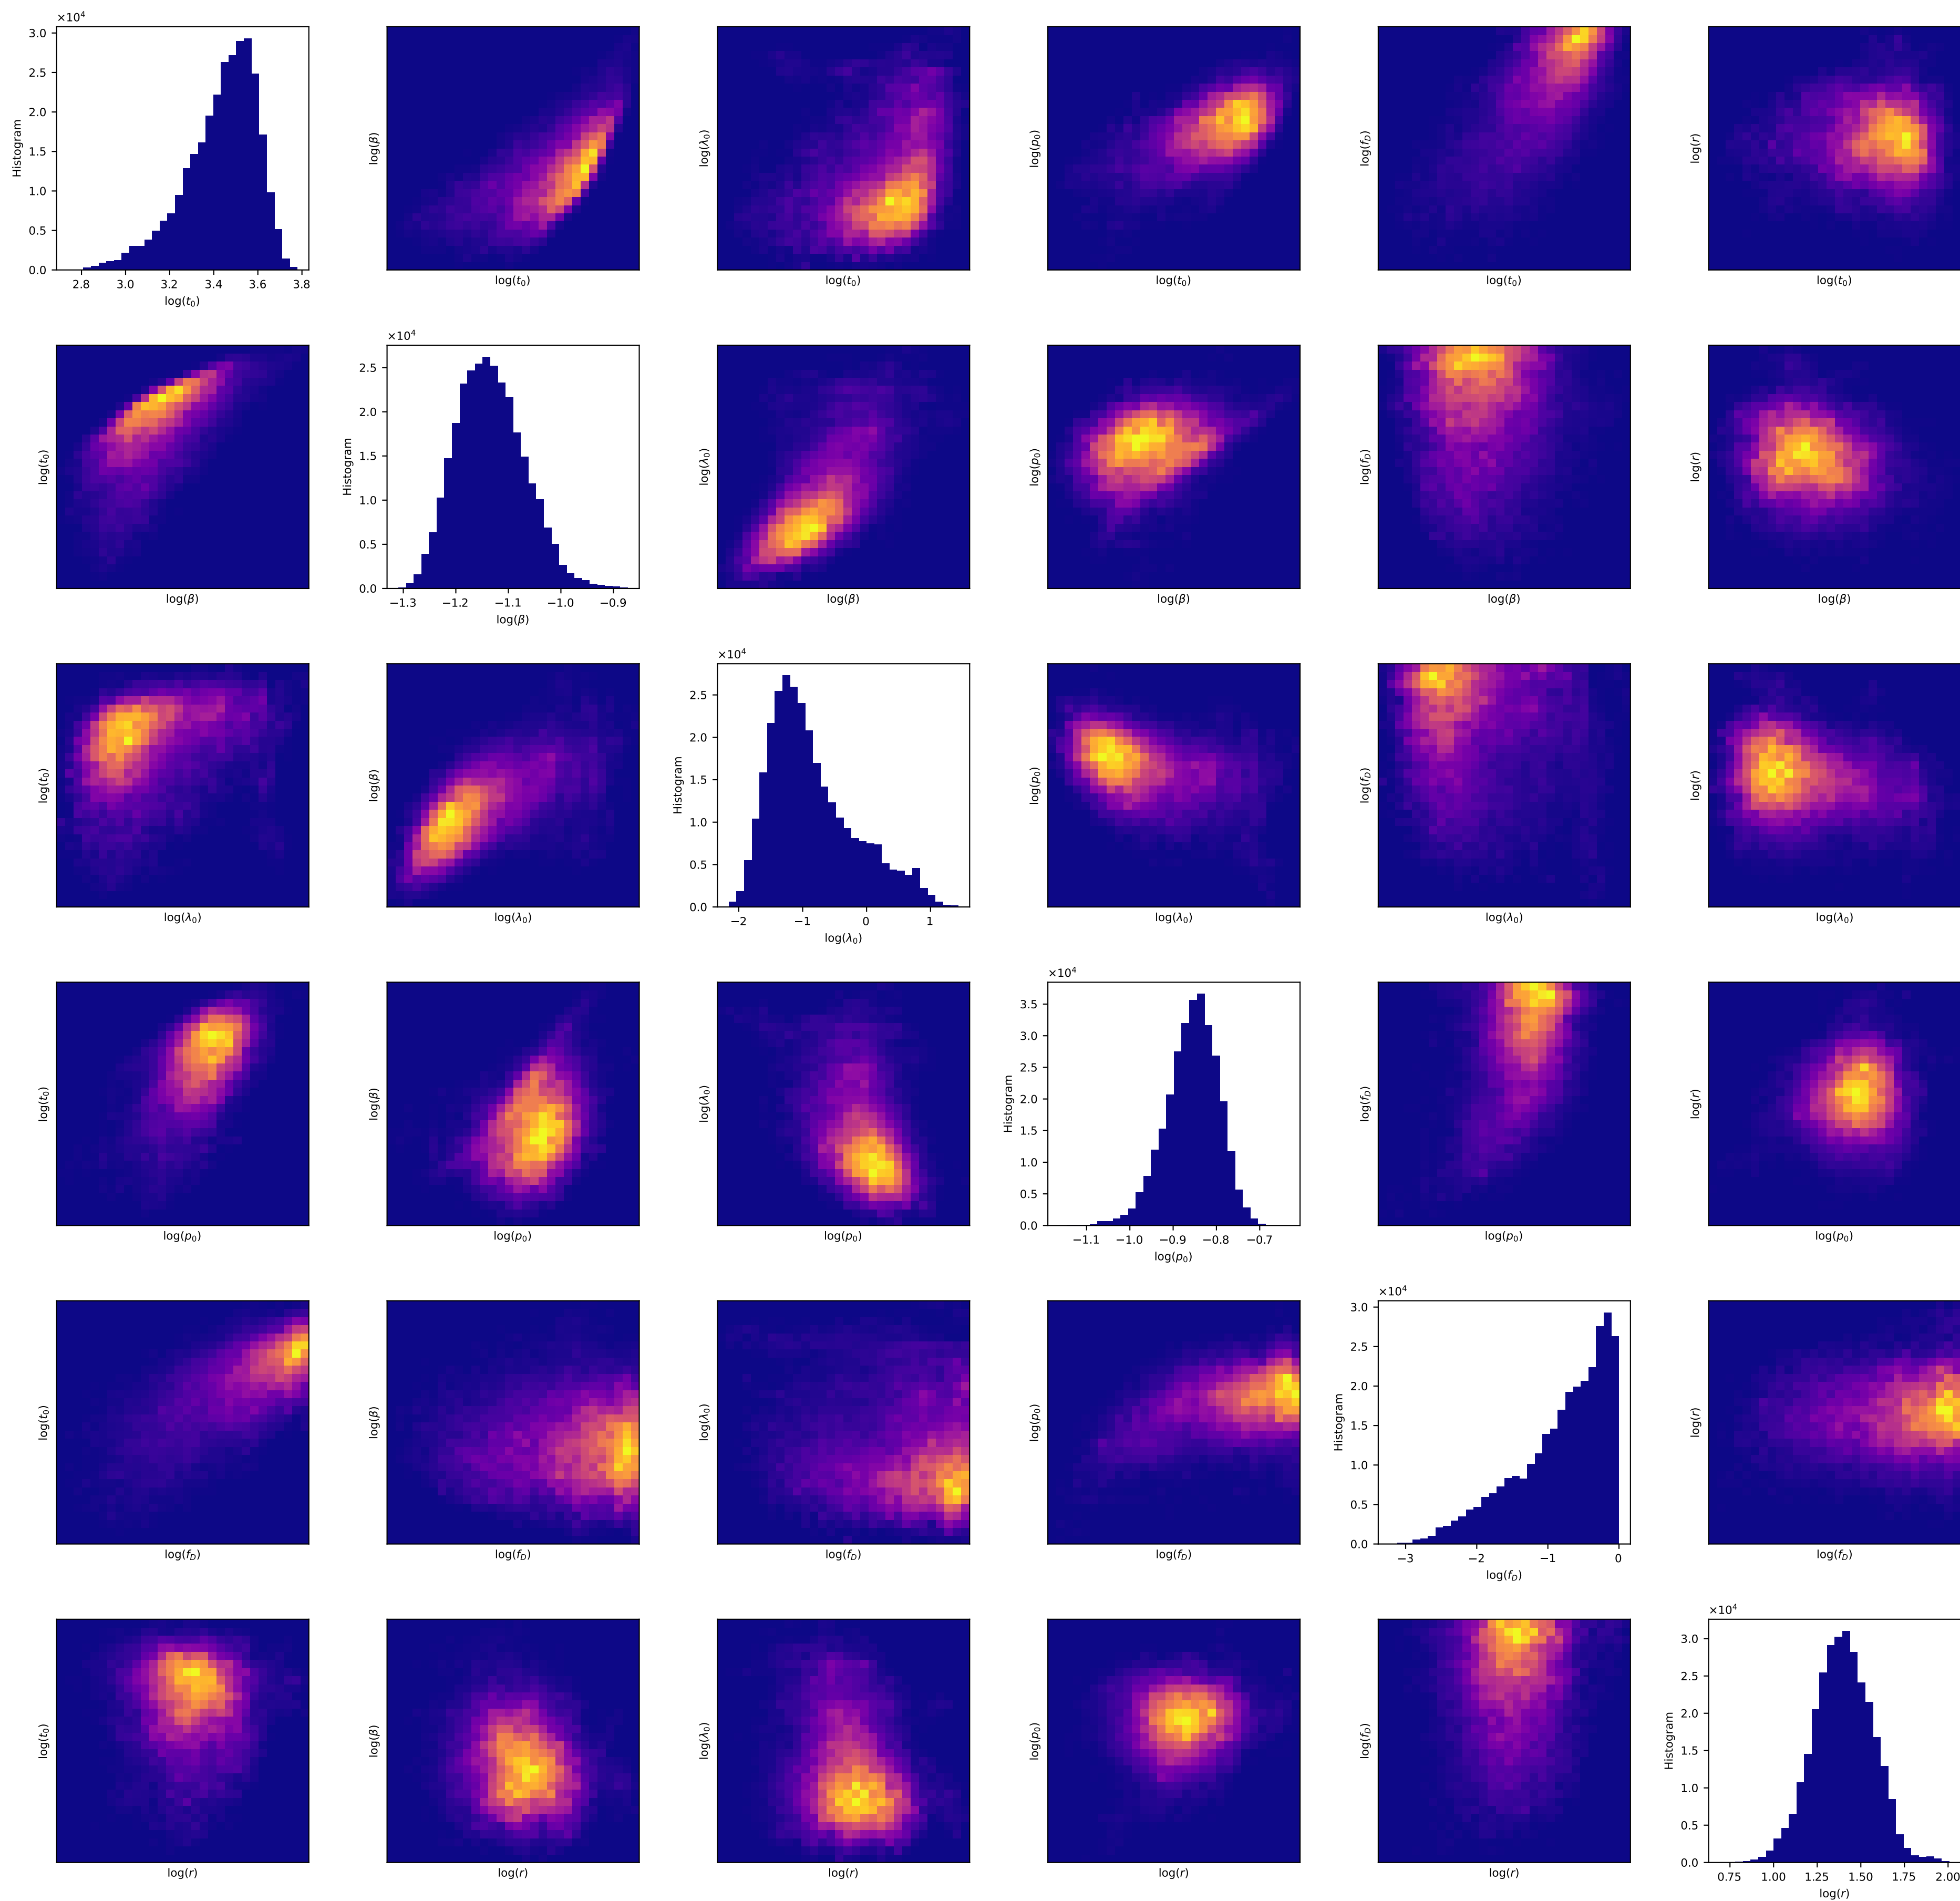

# Tennessee

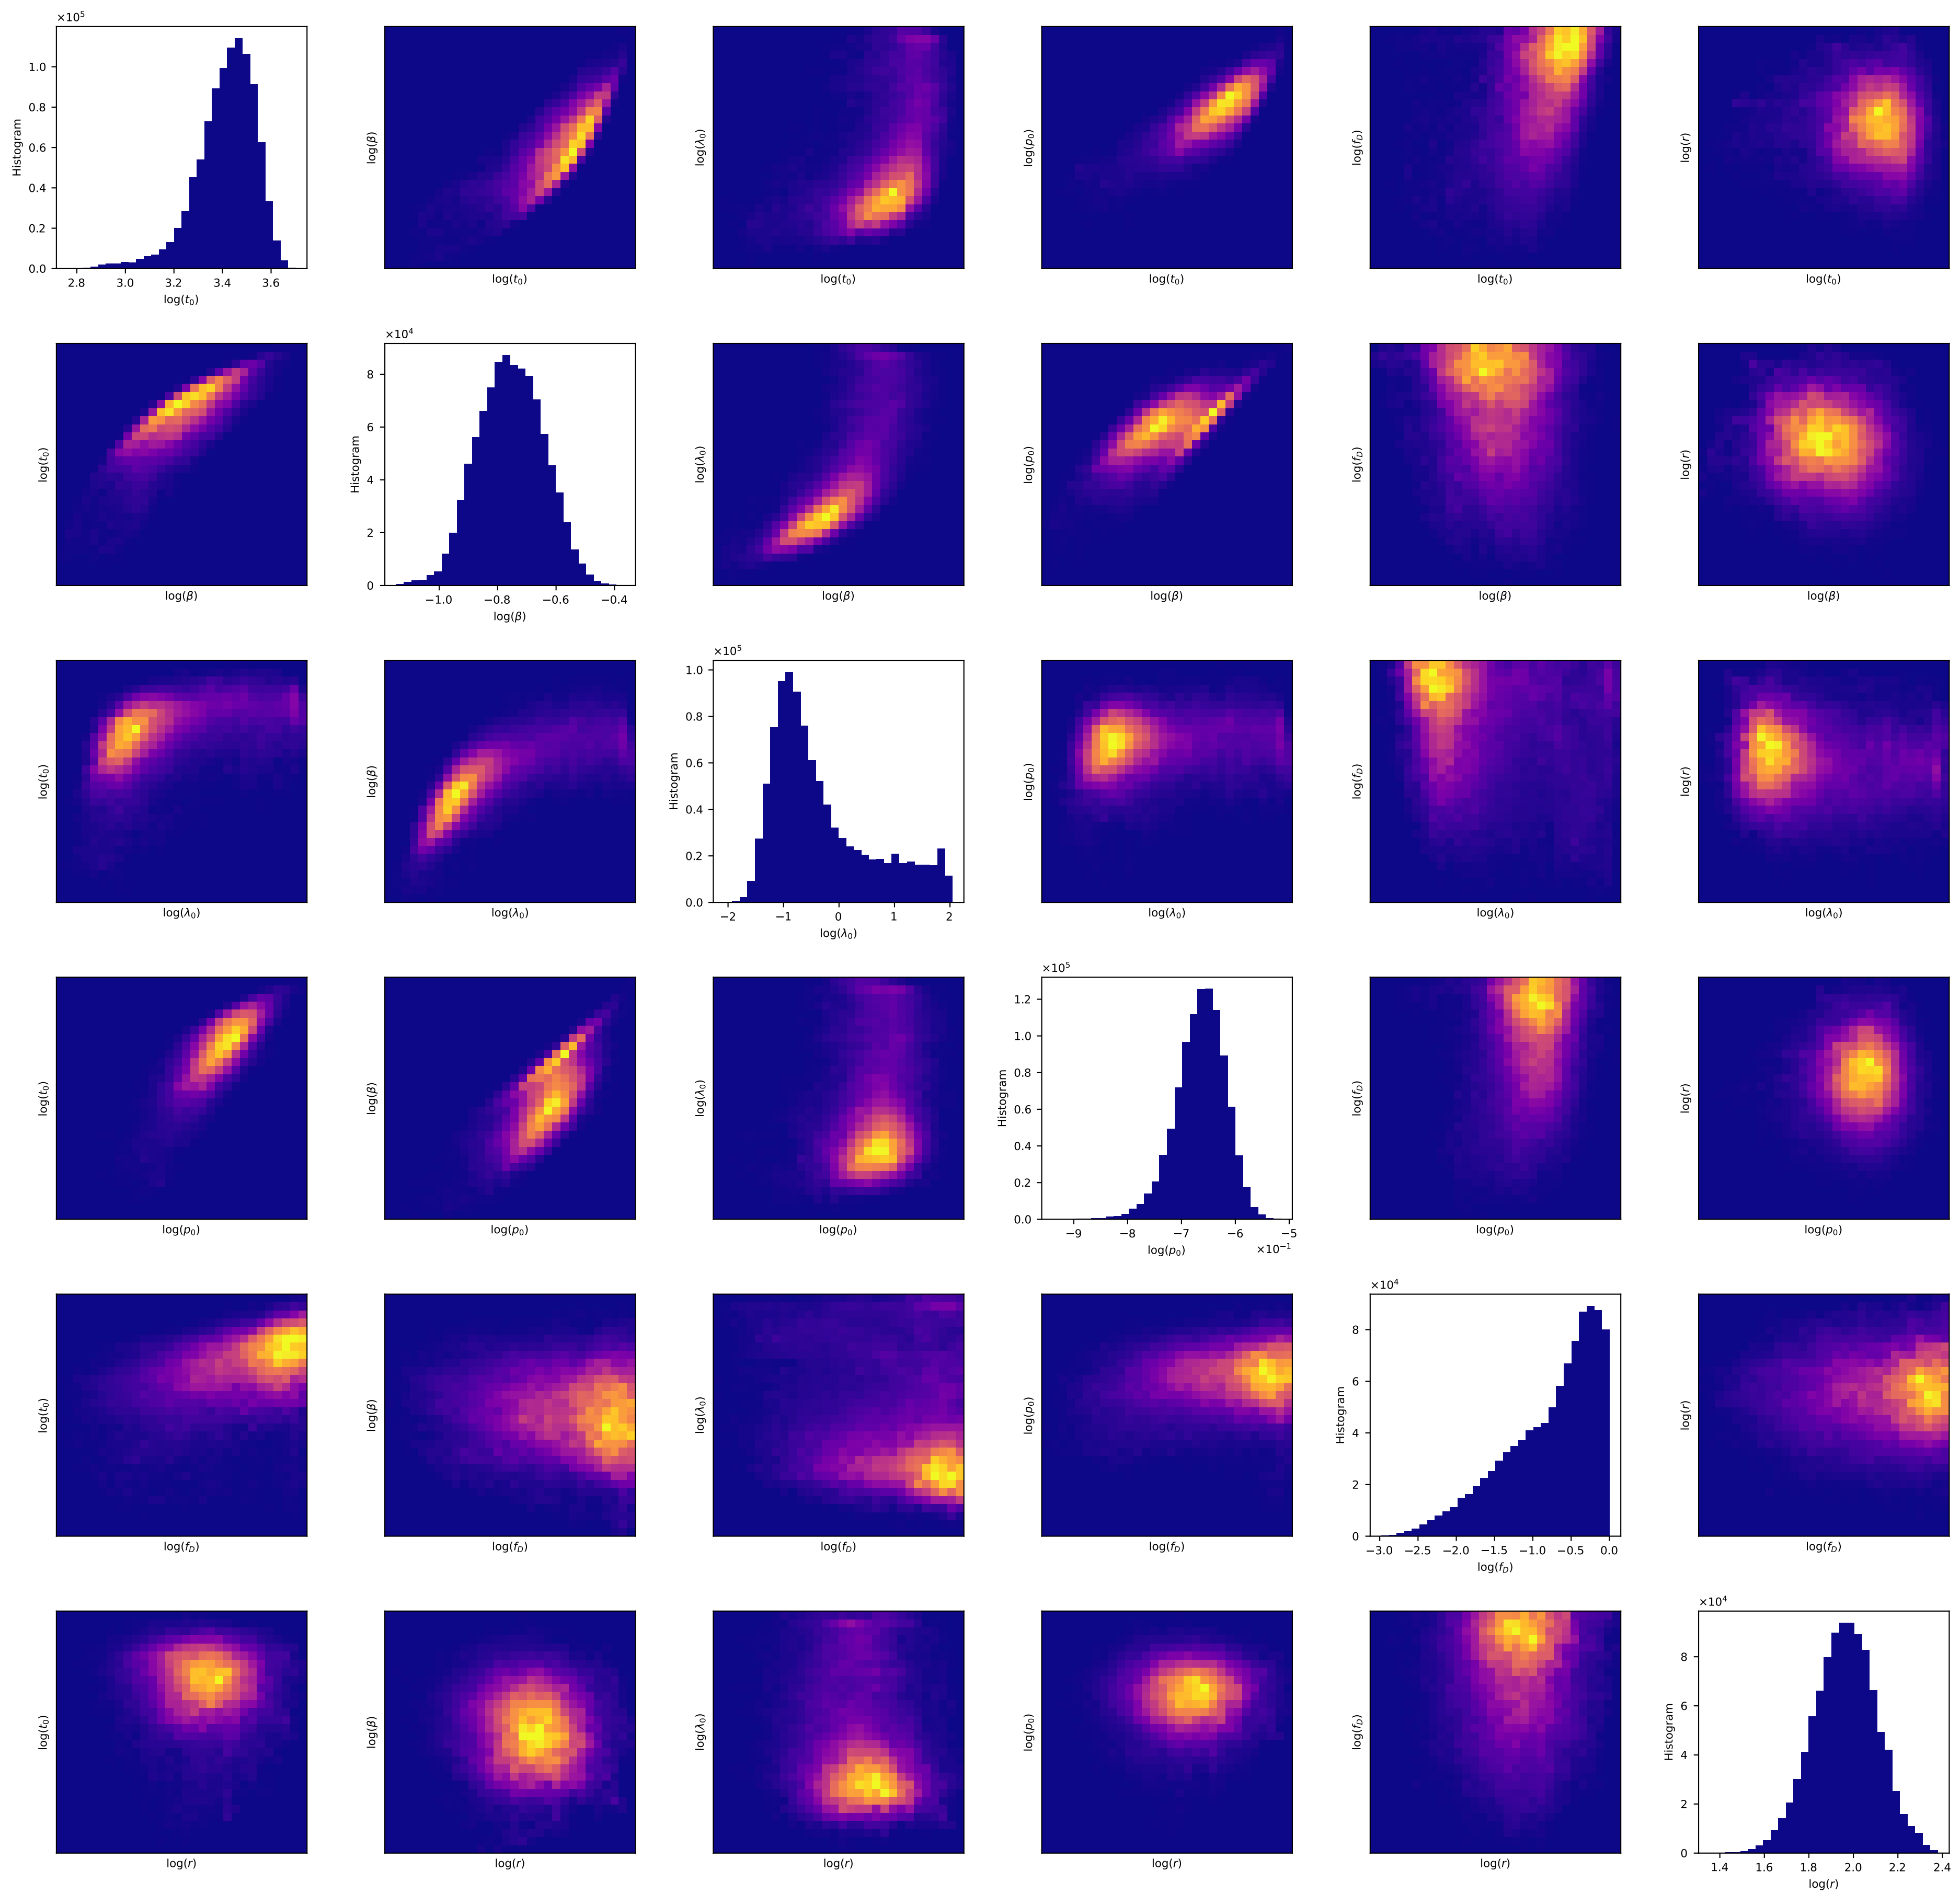



# Texas

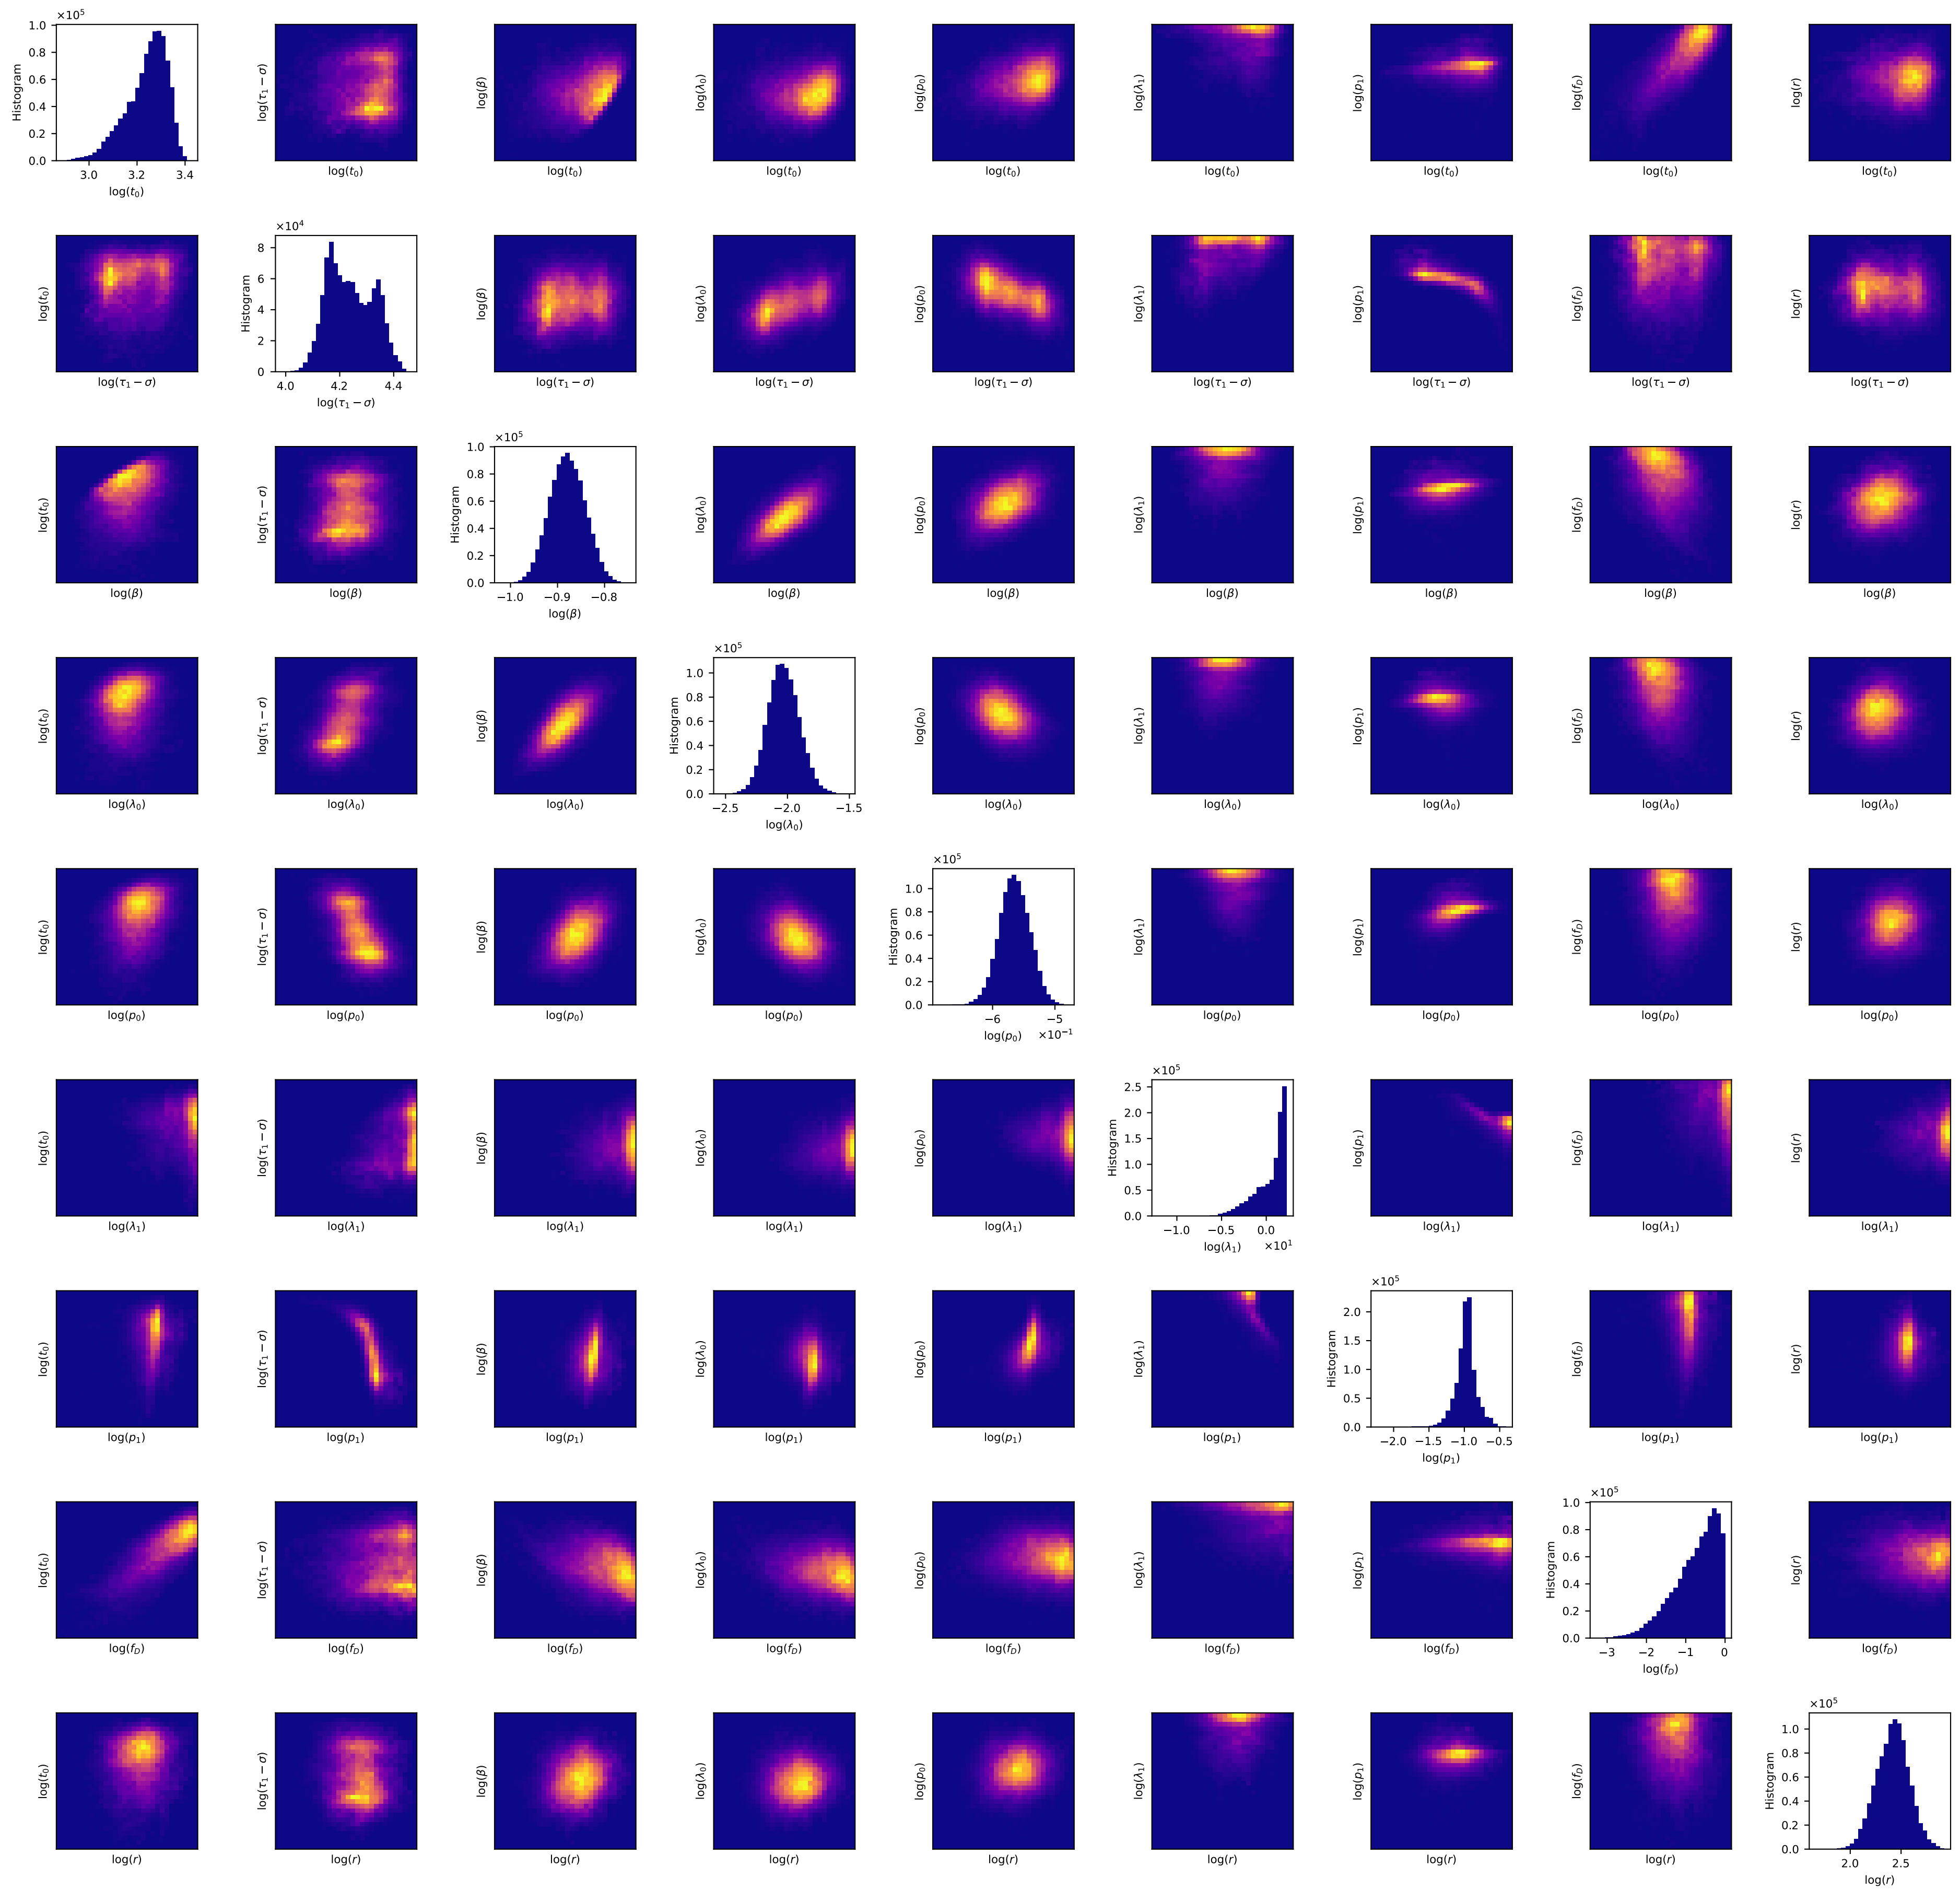

# Utah

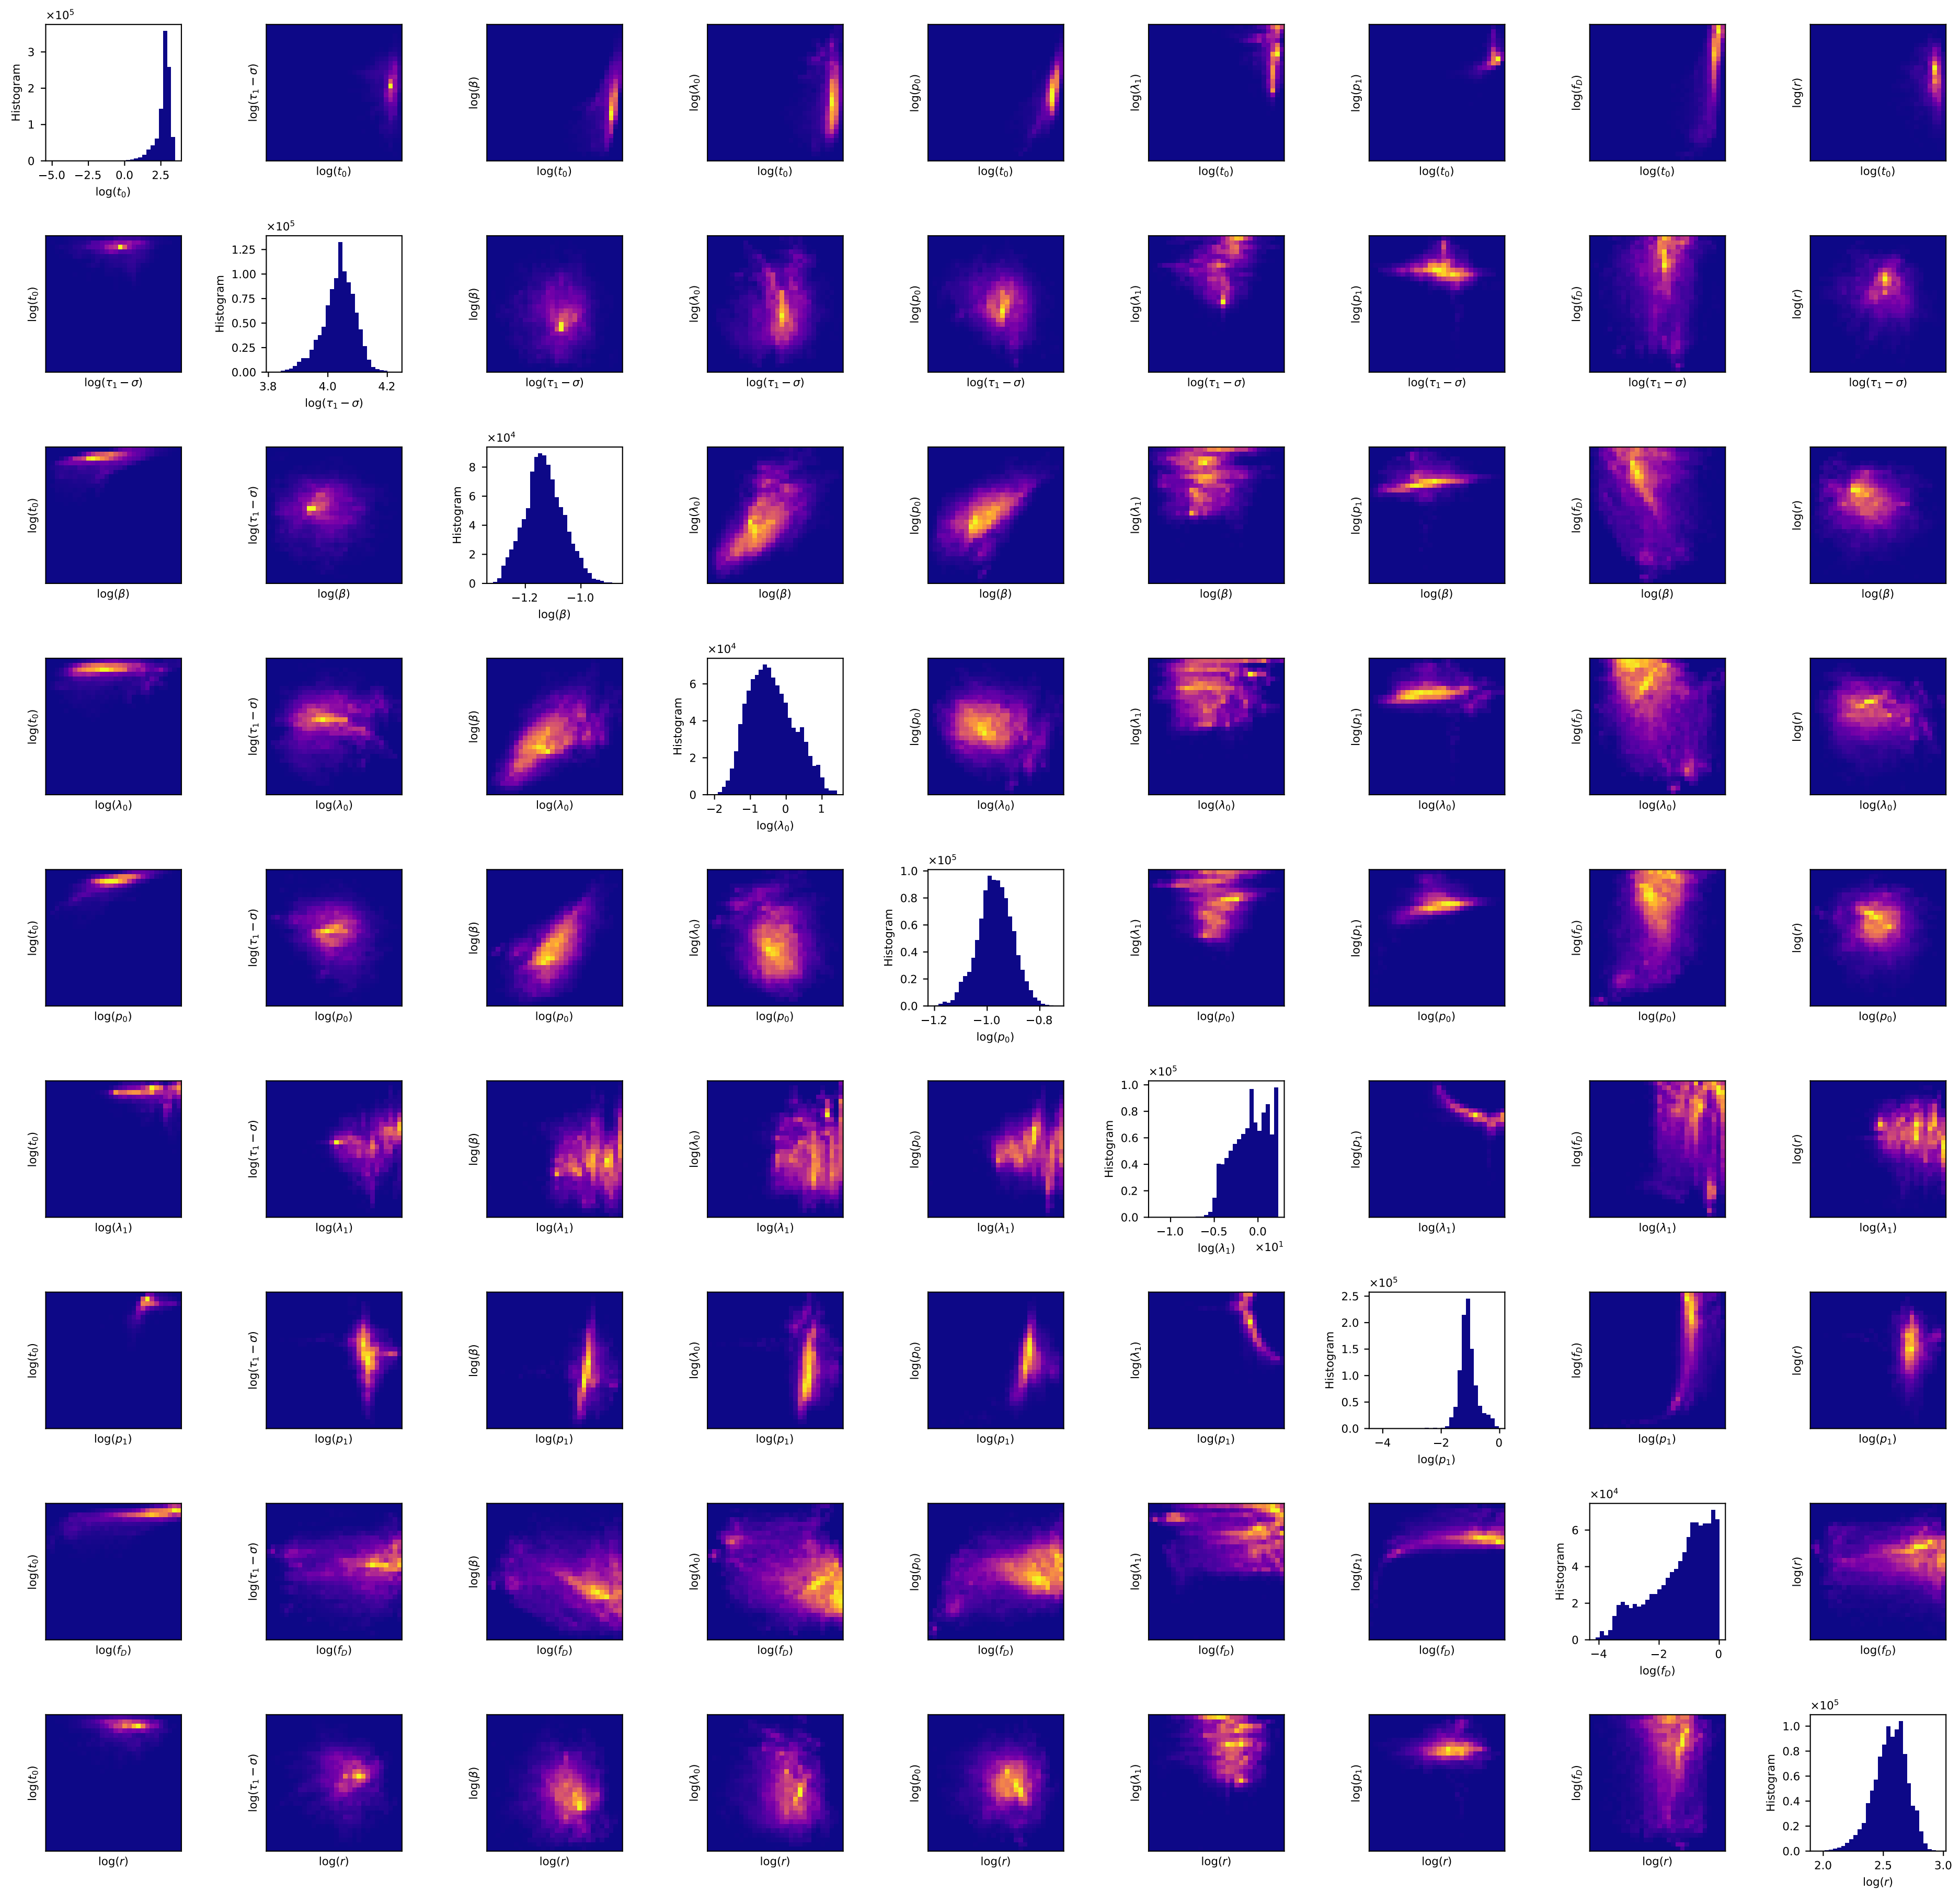

# Vermont

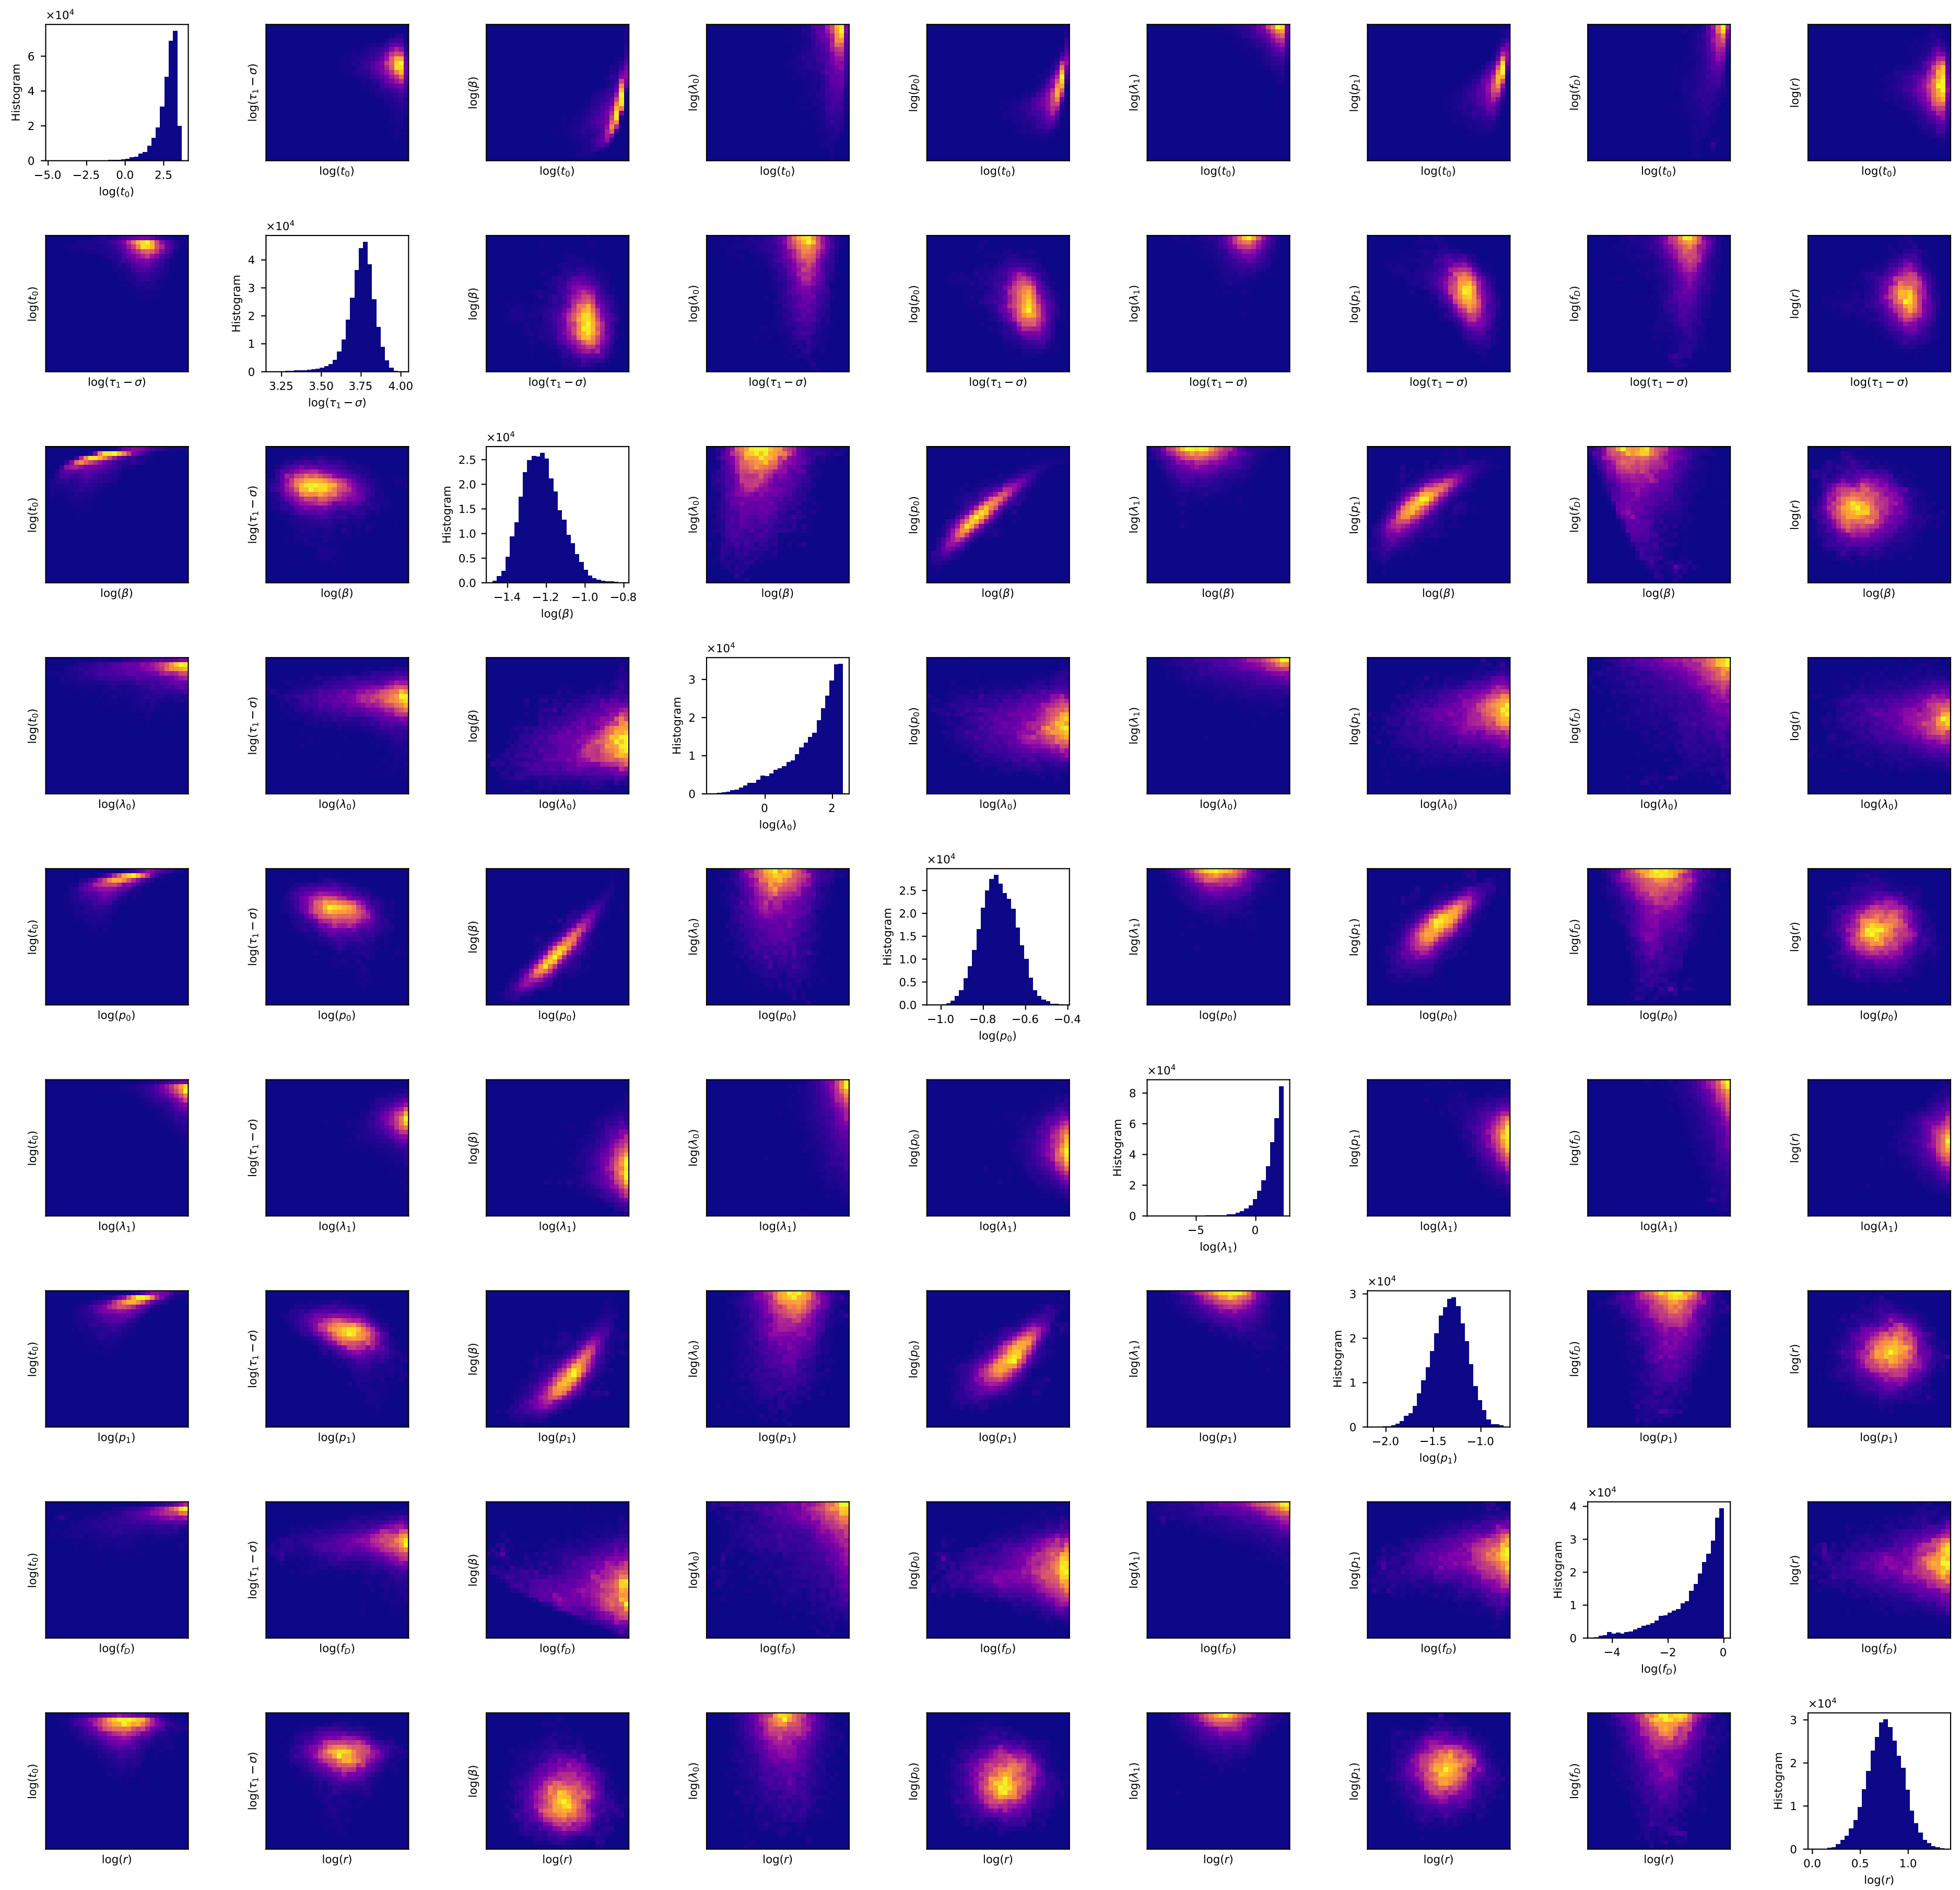

# Virginia

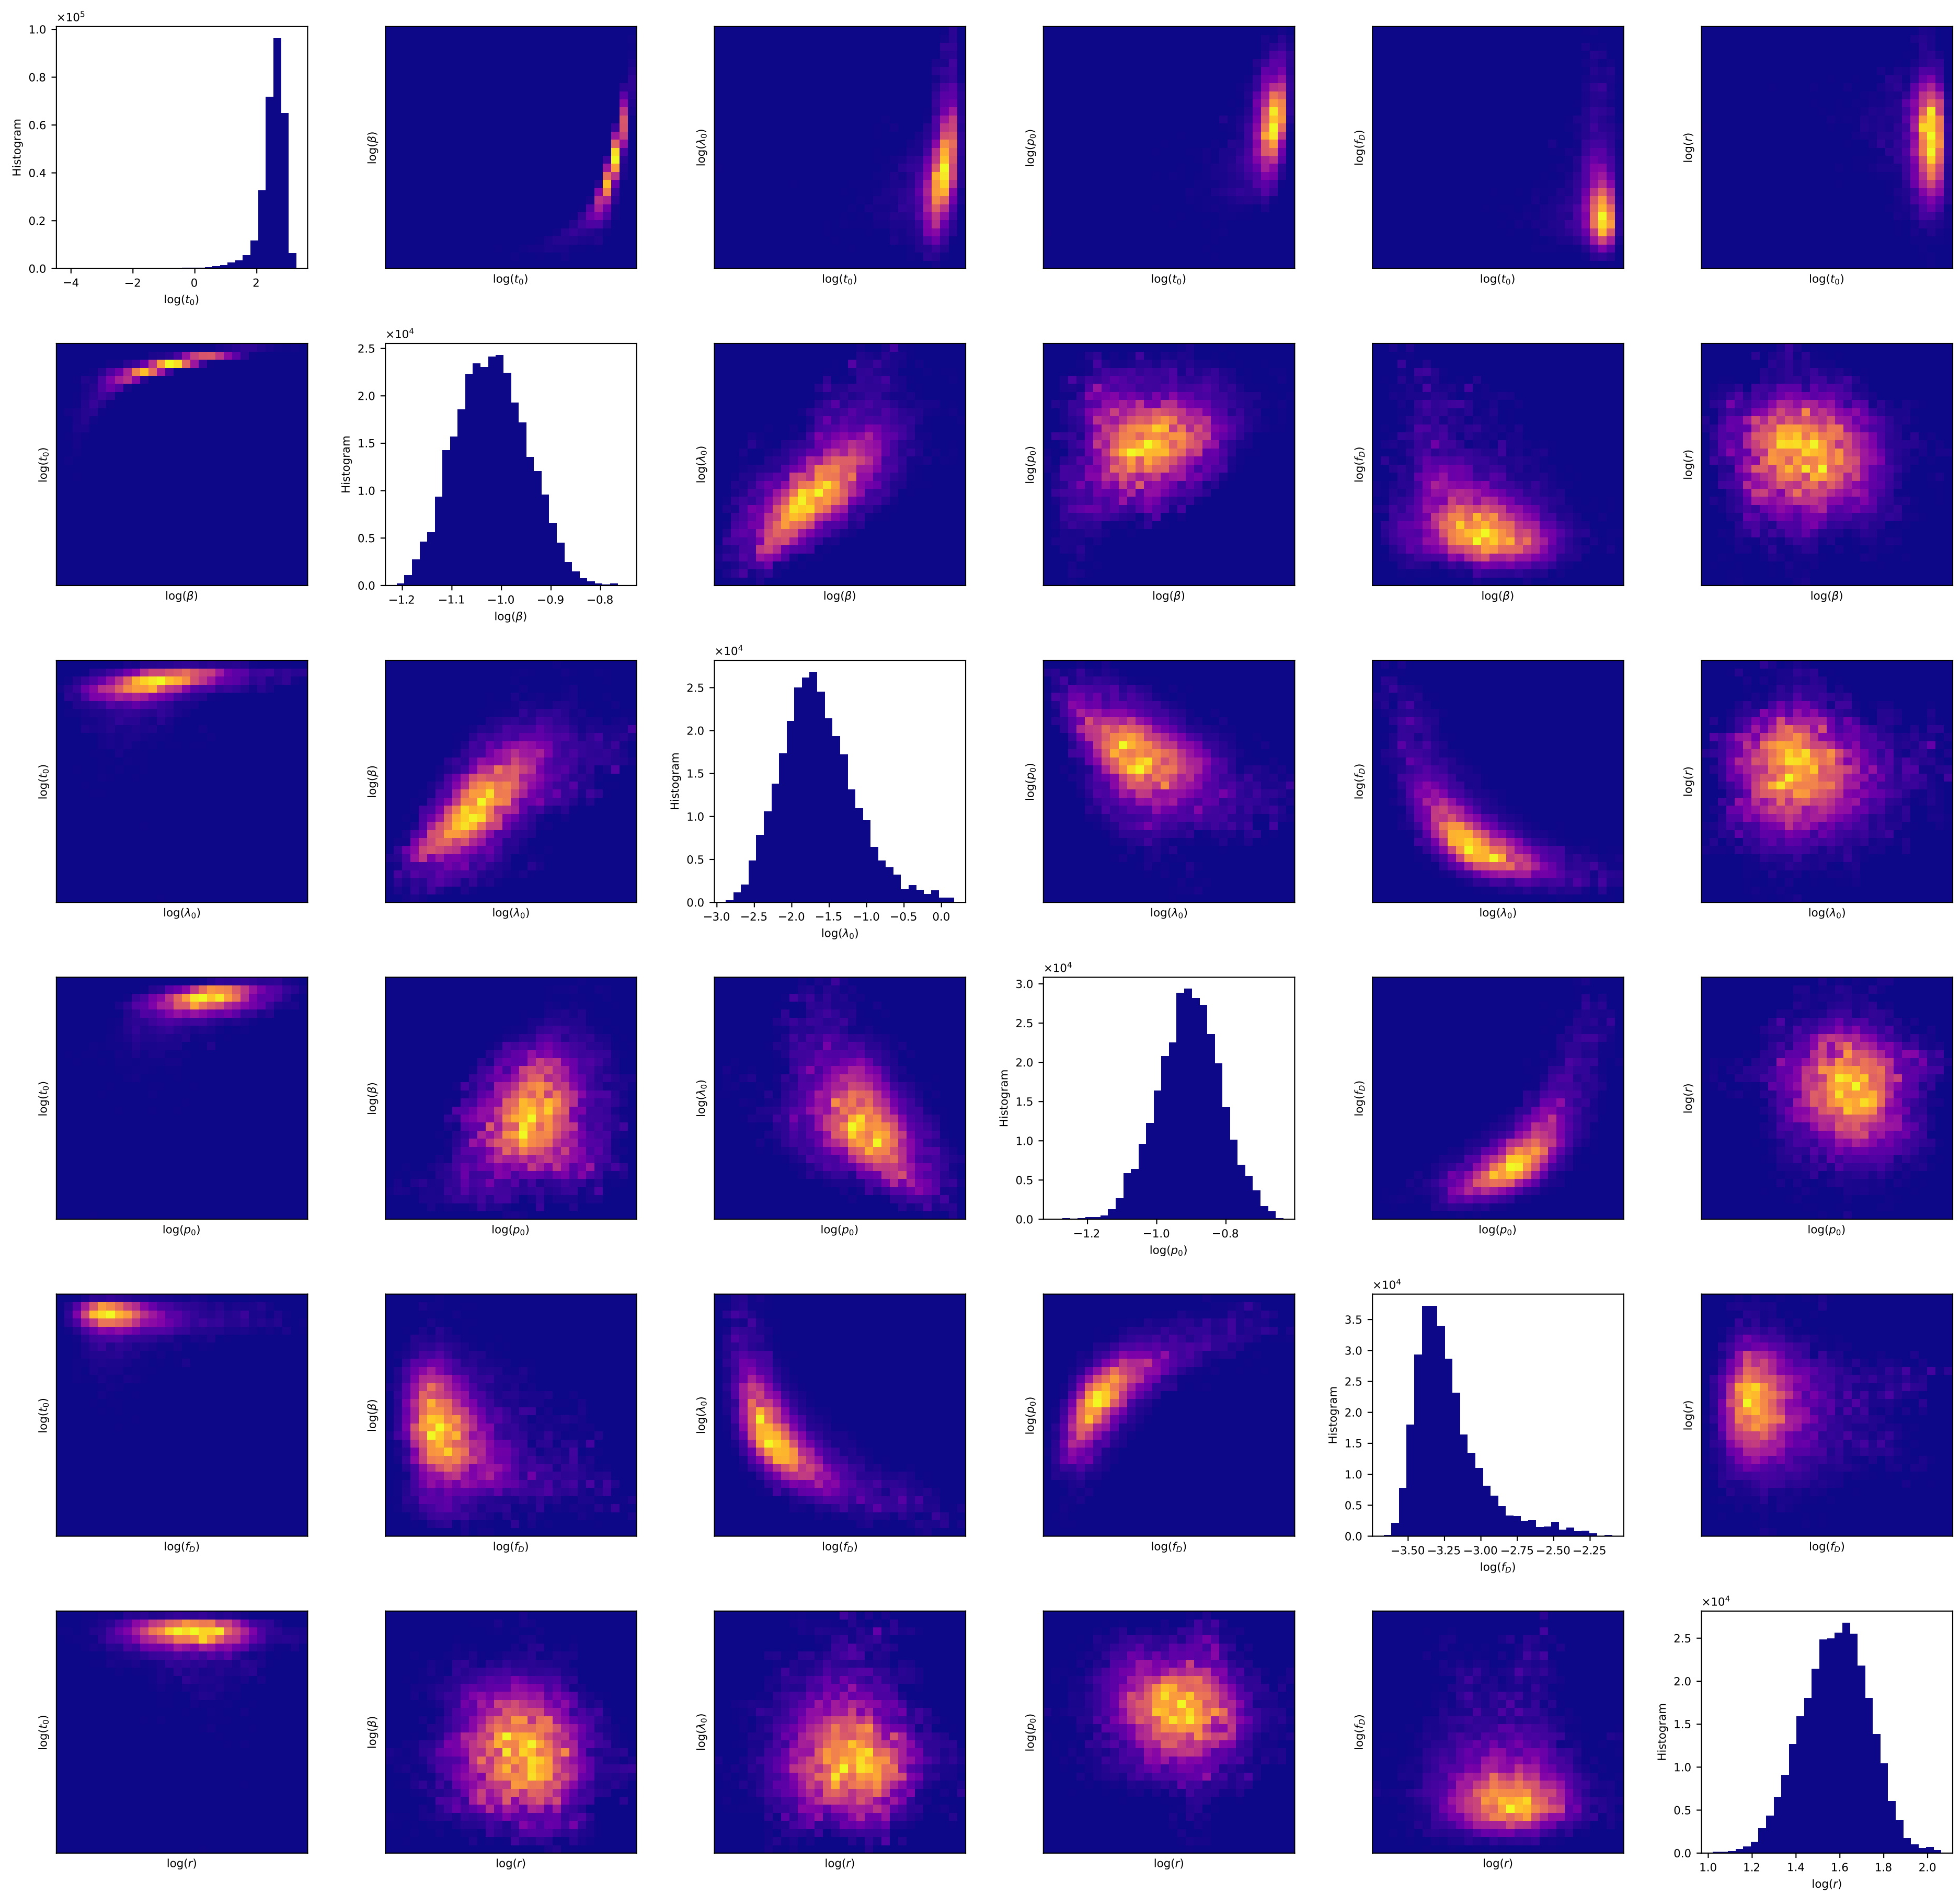

# Washington

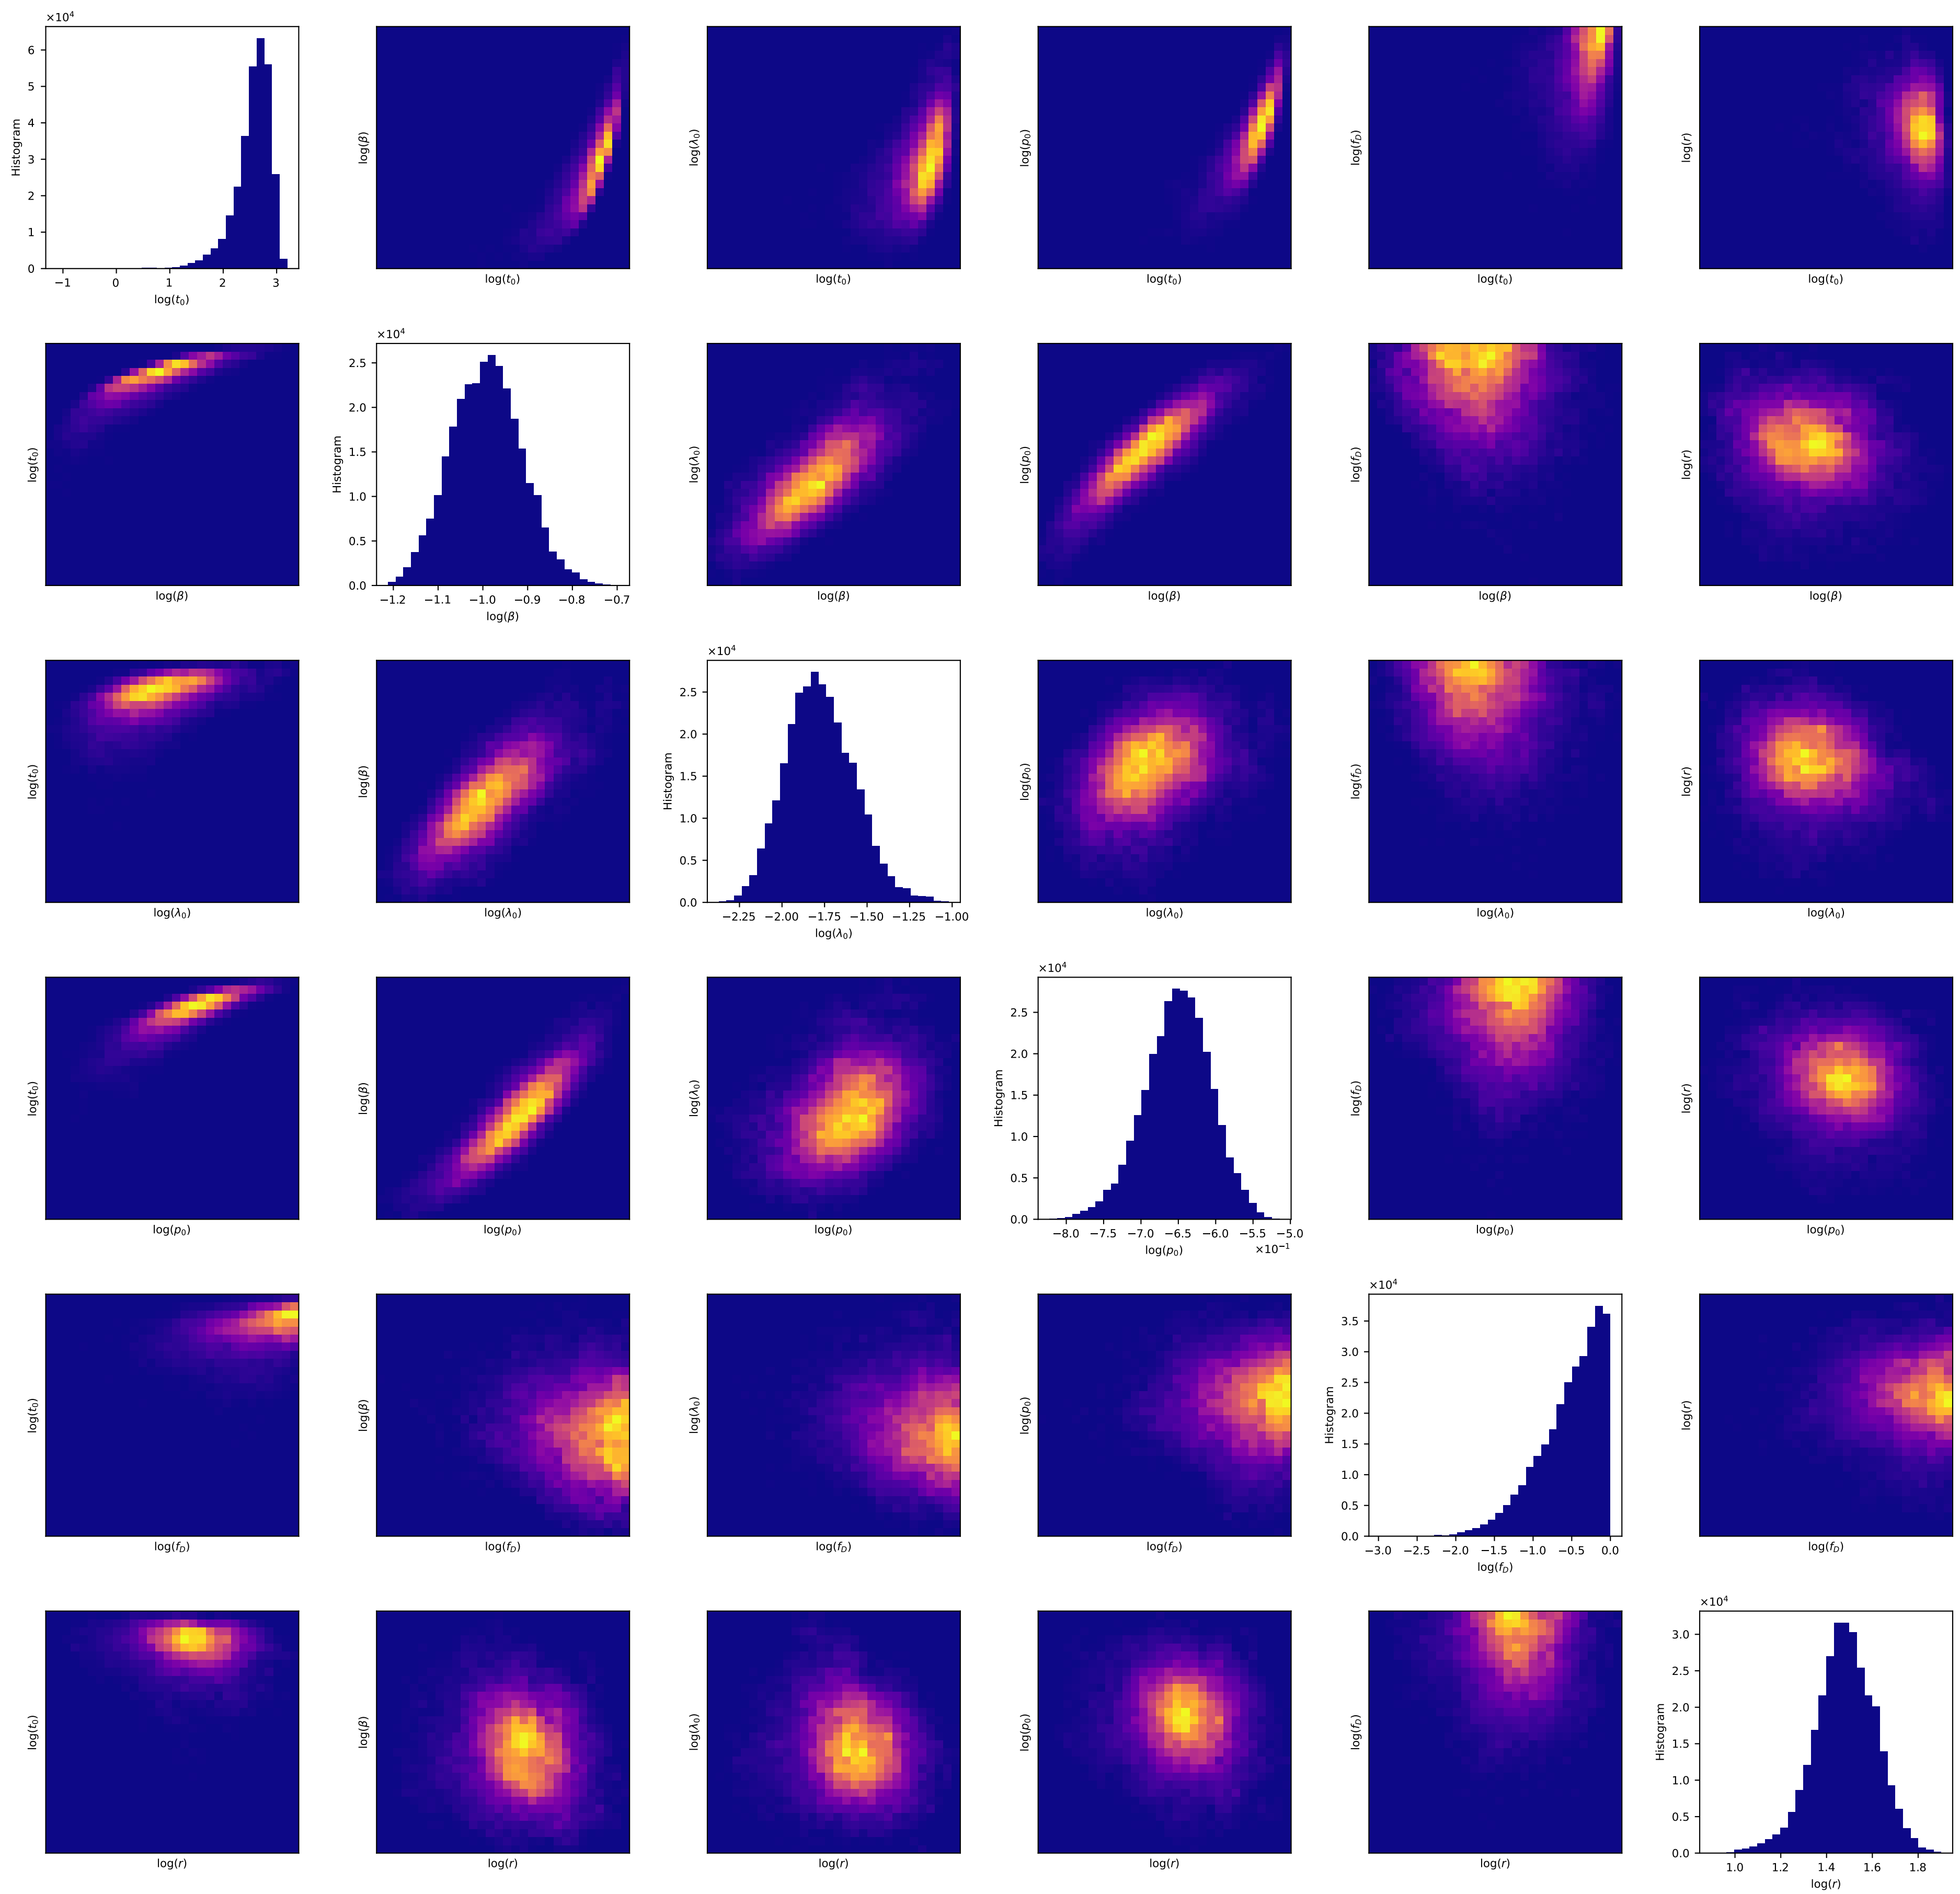

# West Virginia

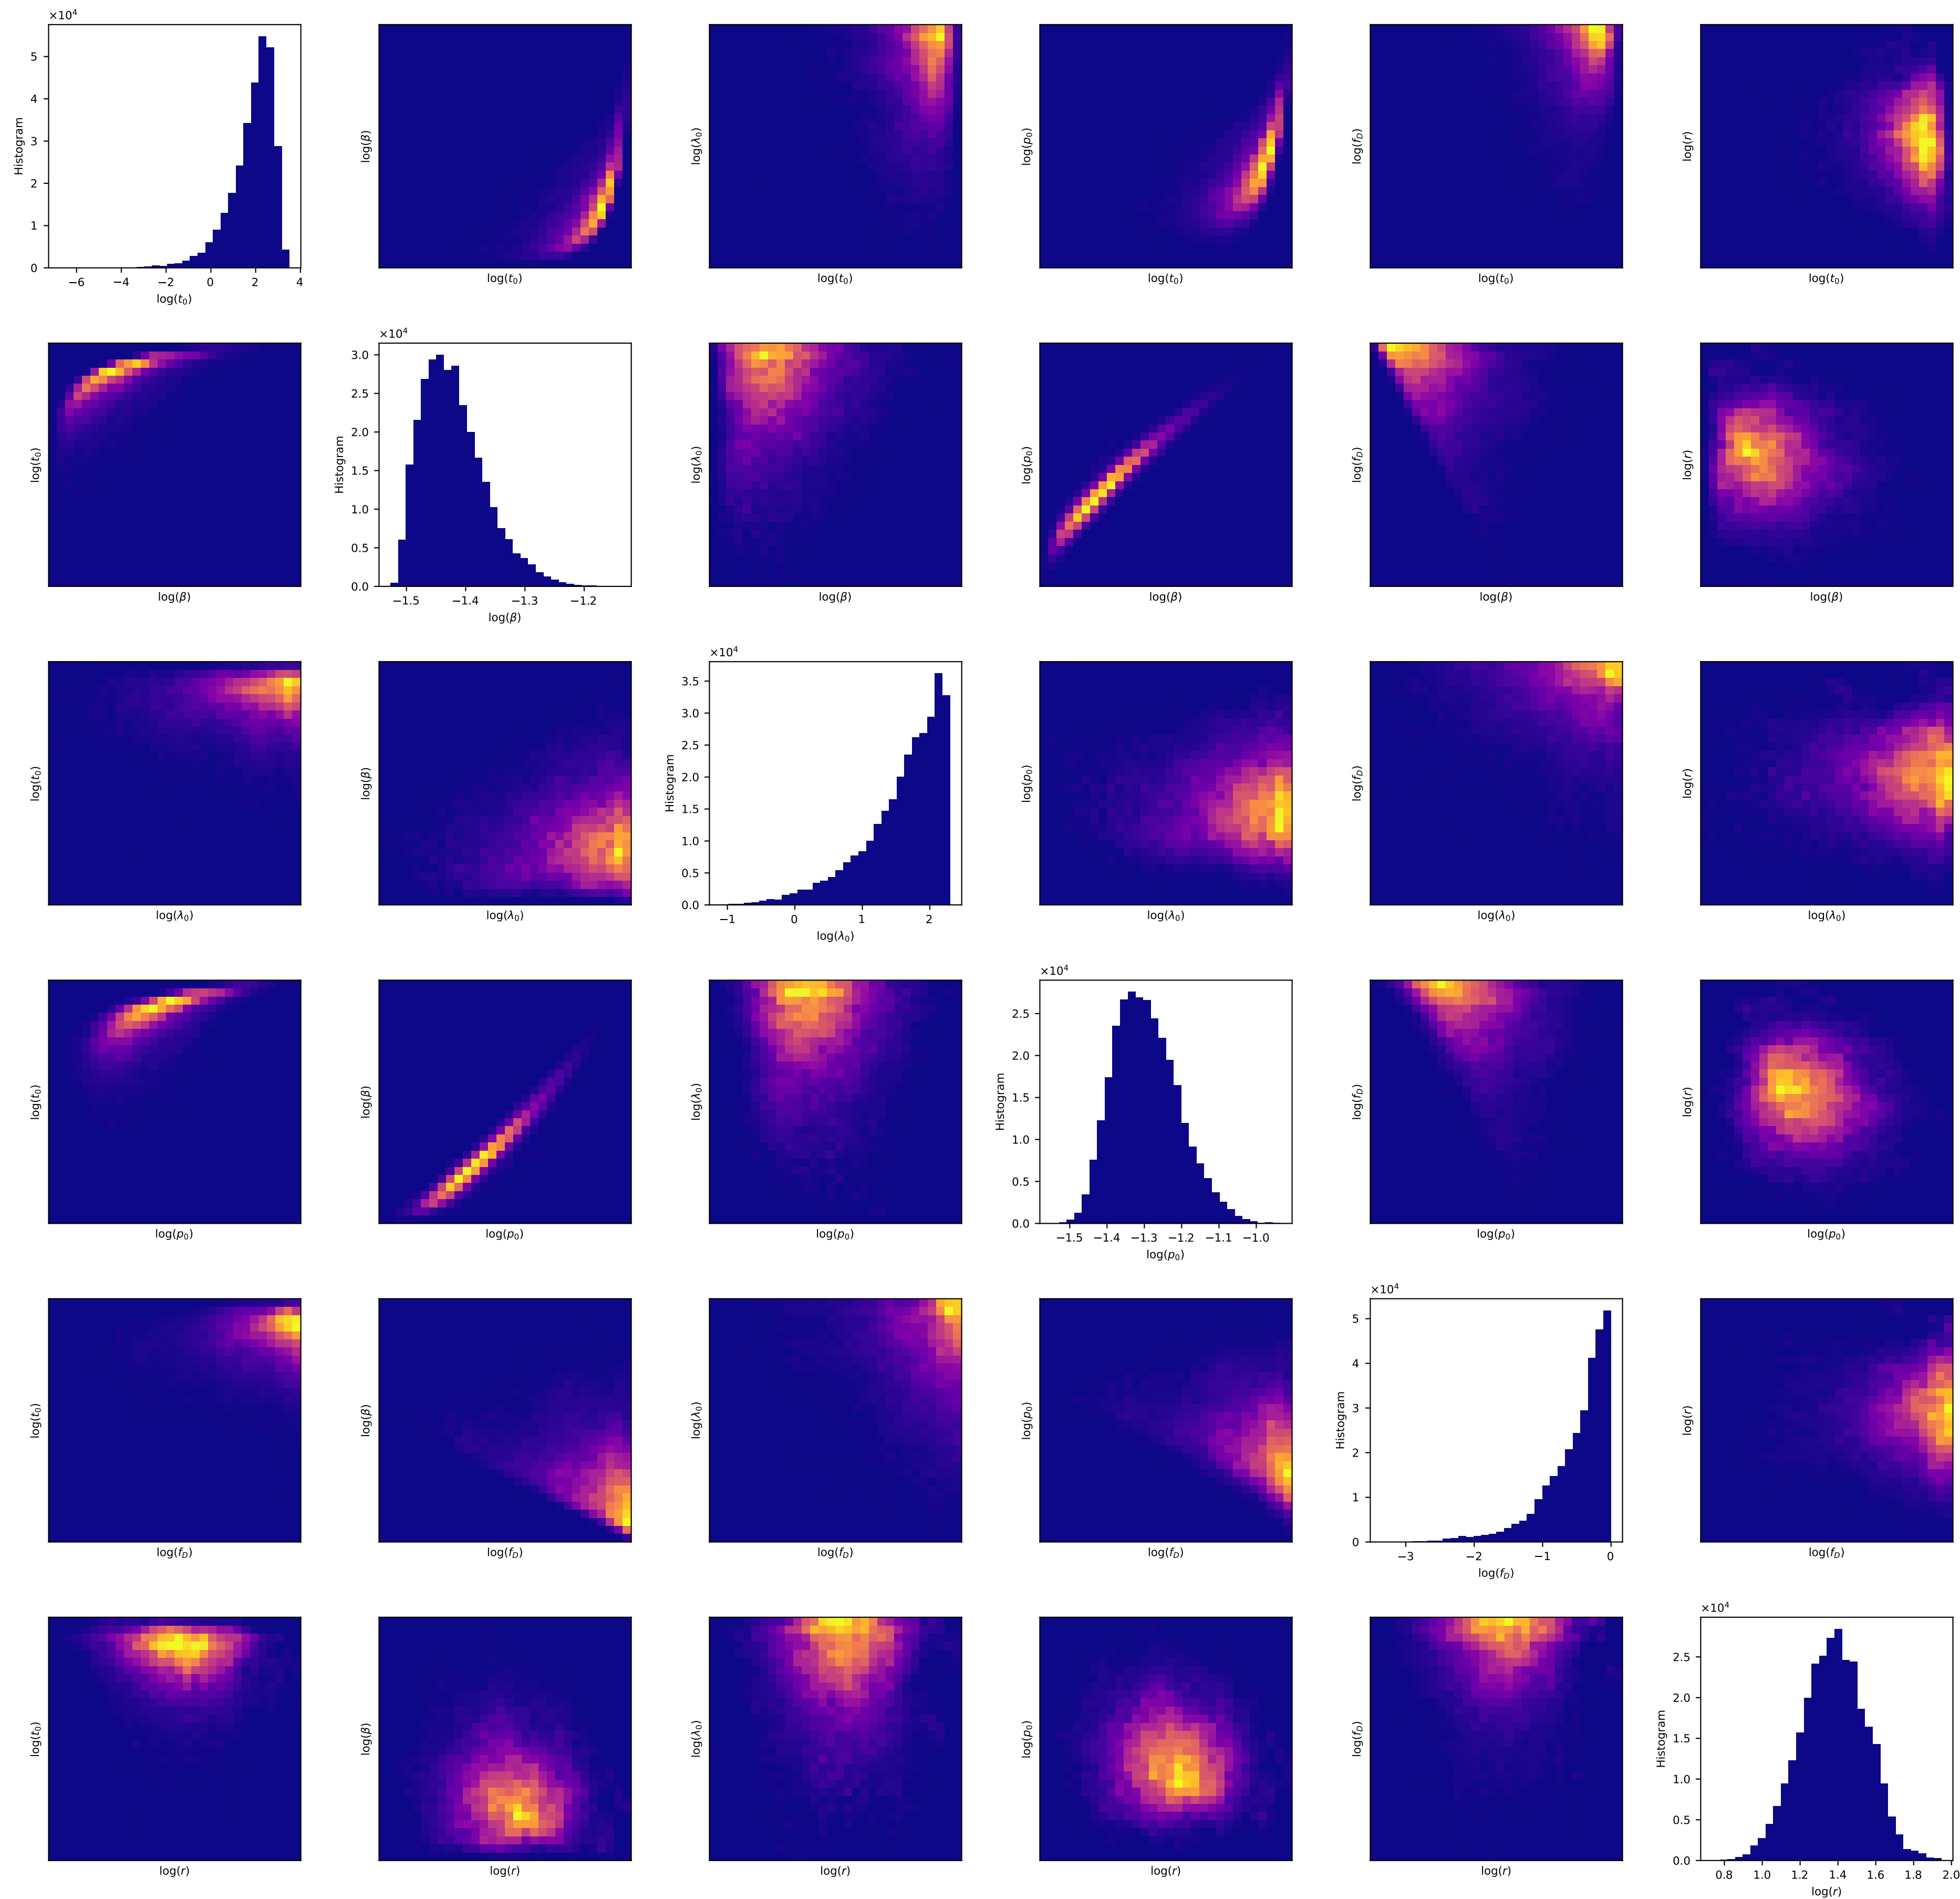

# Wisconsin

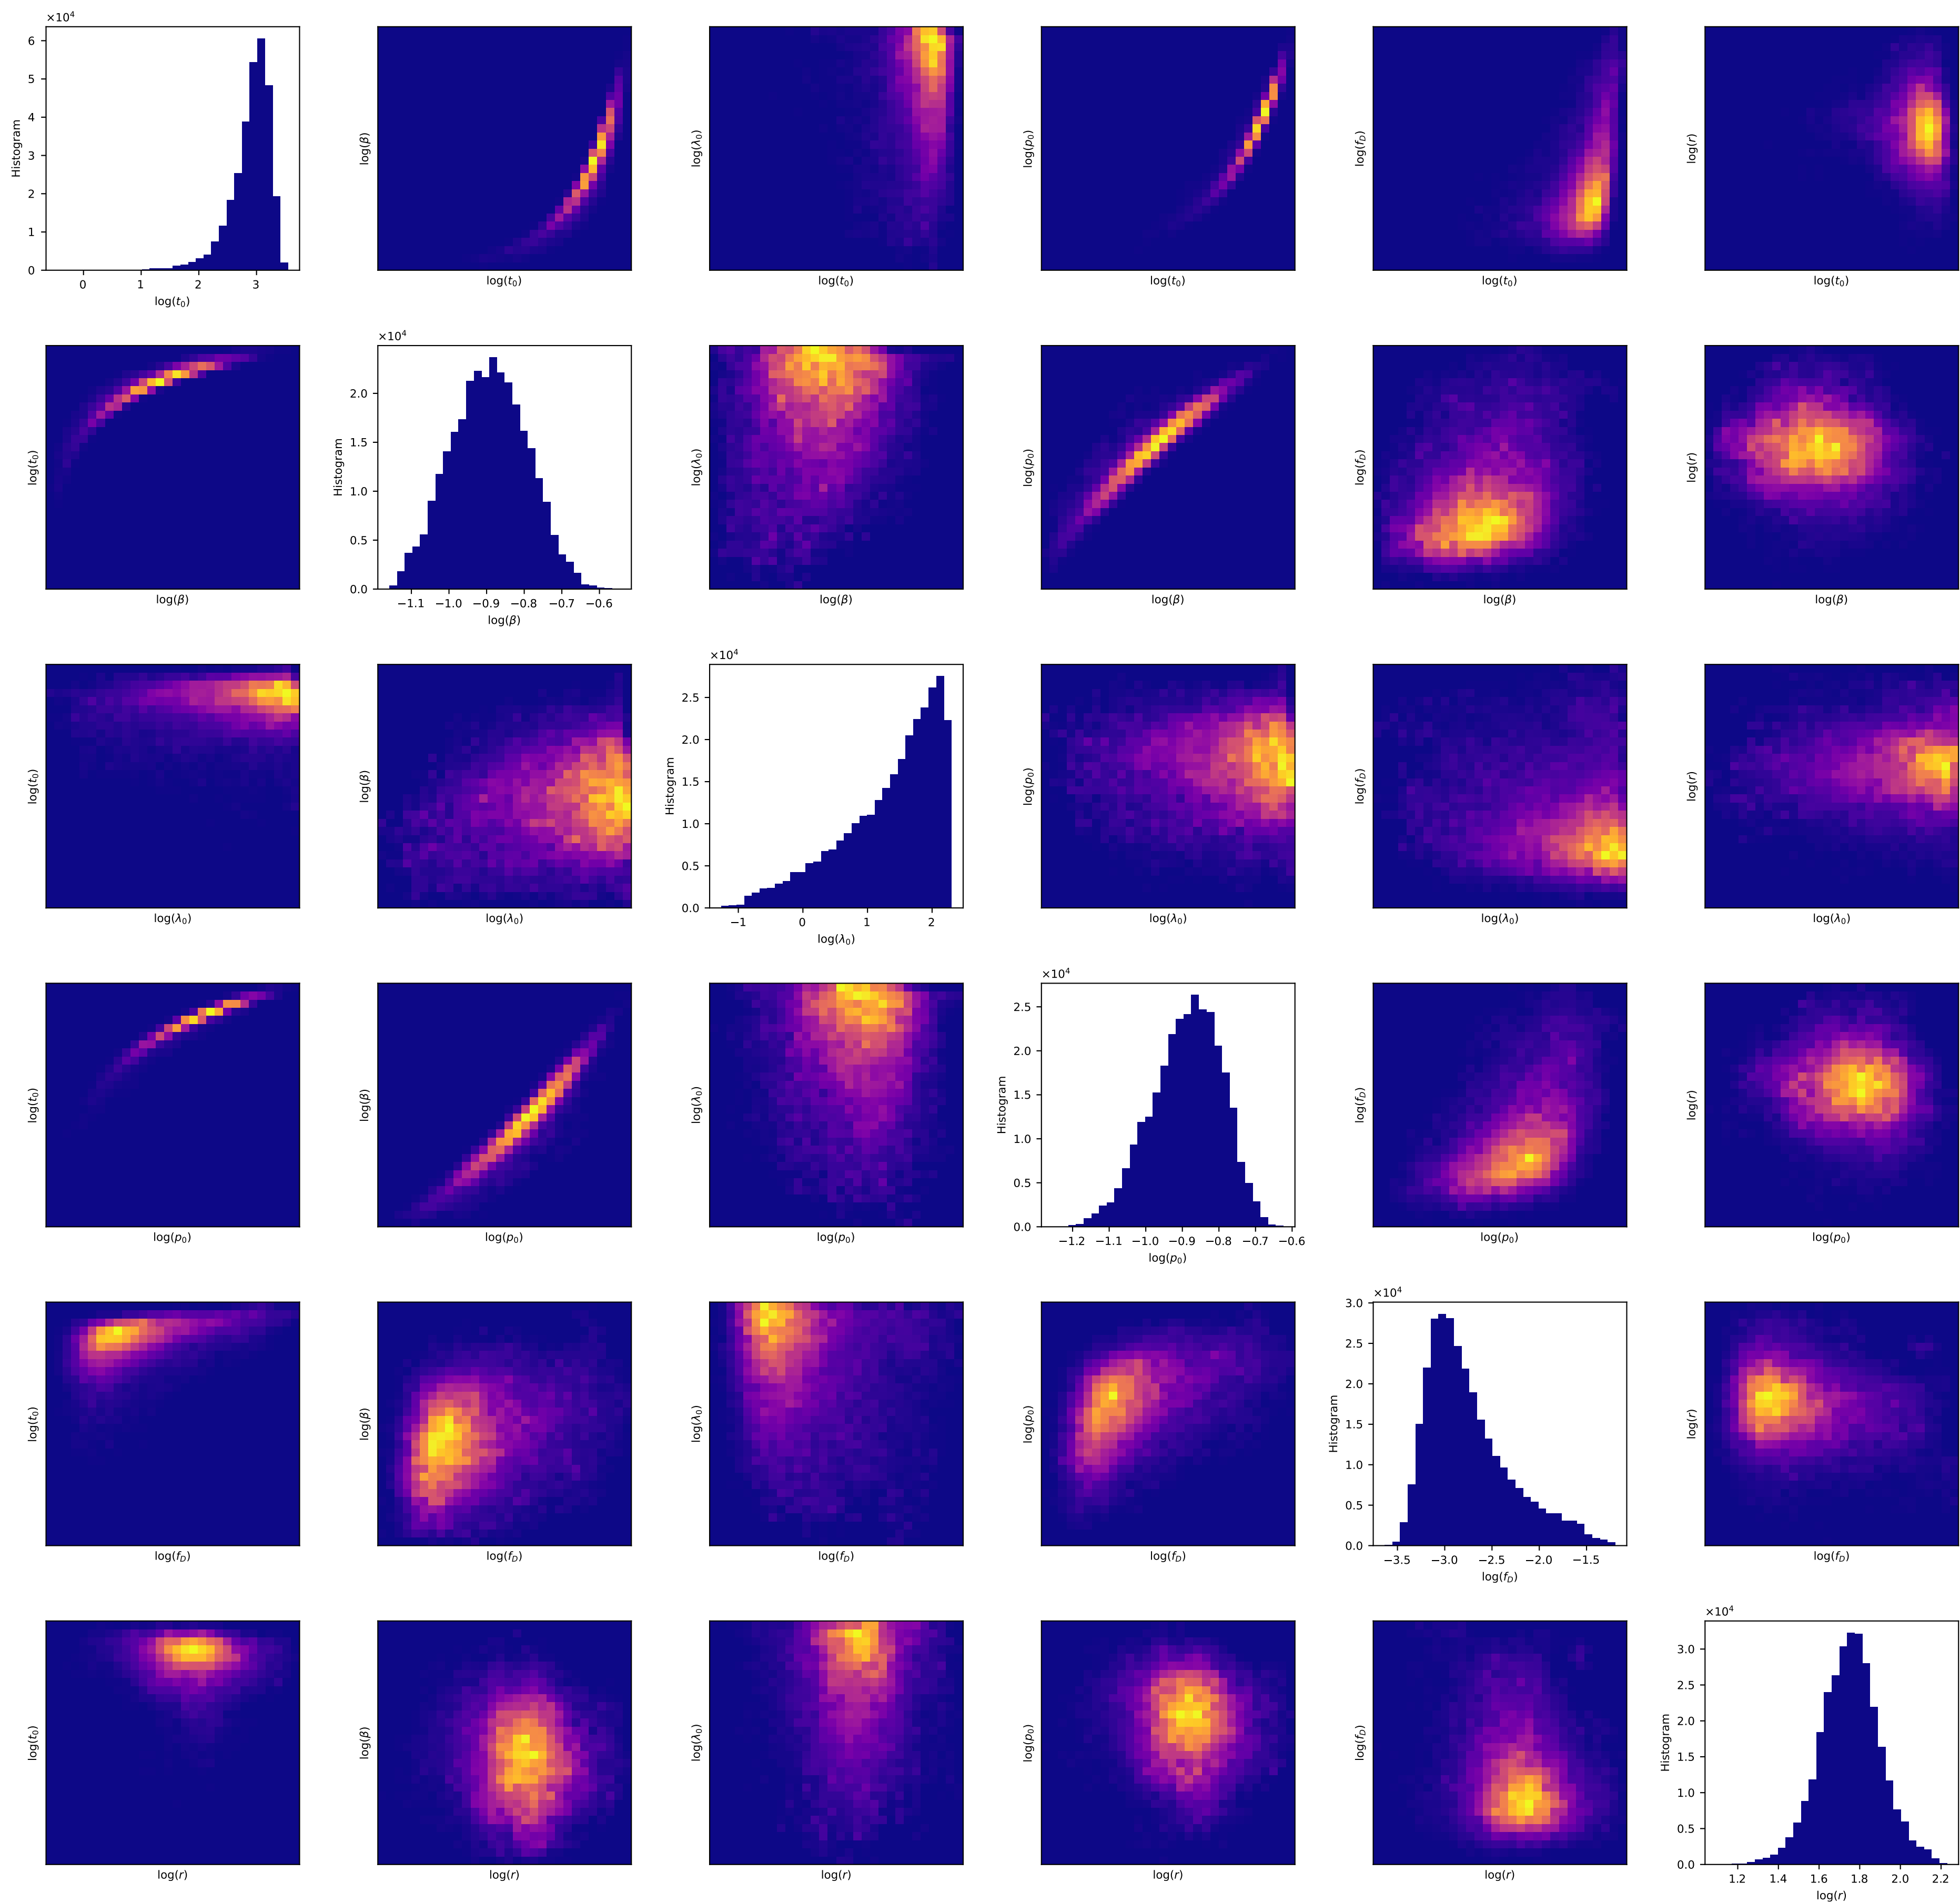

# Wyoming

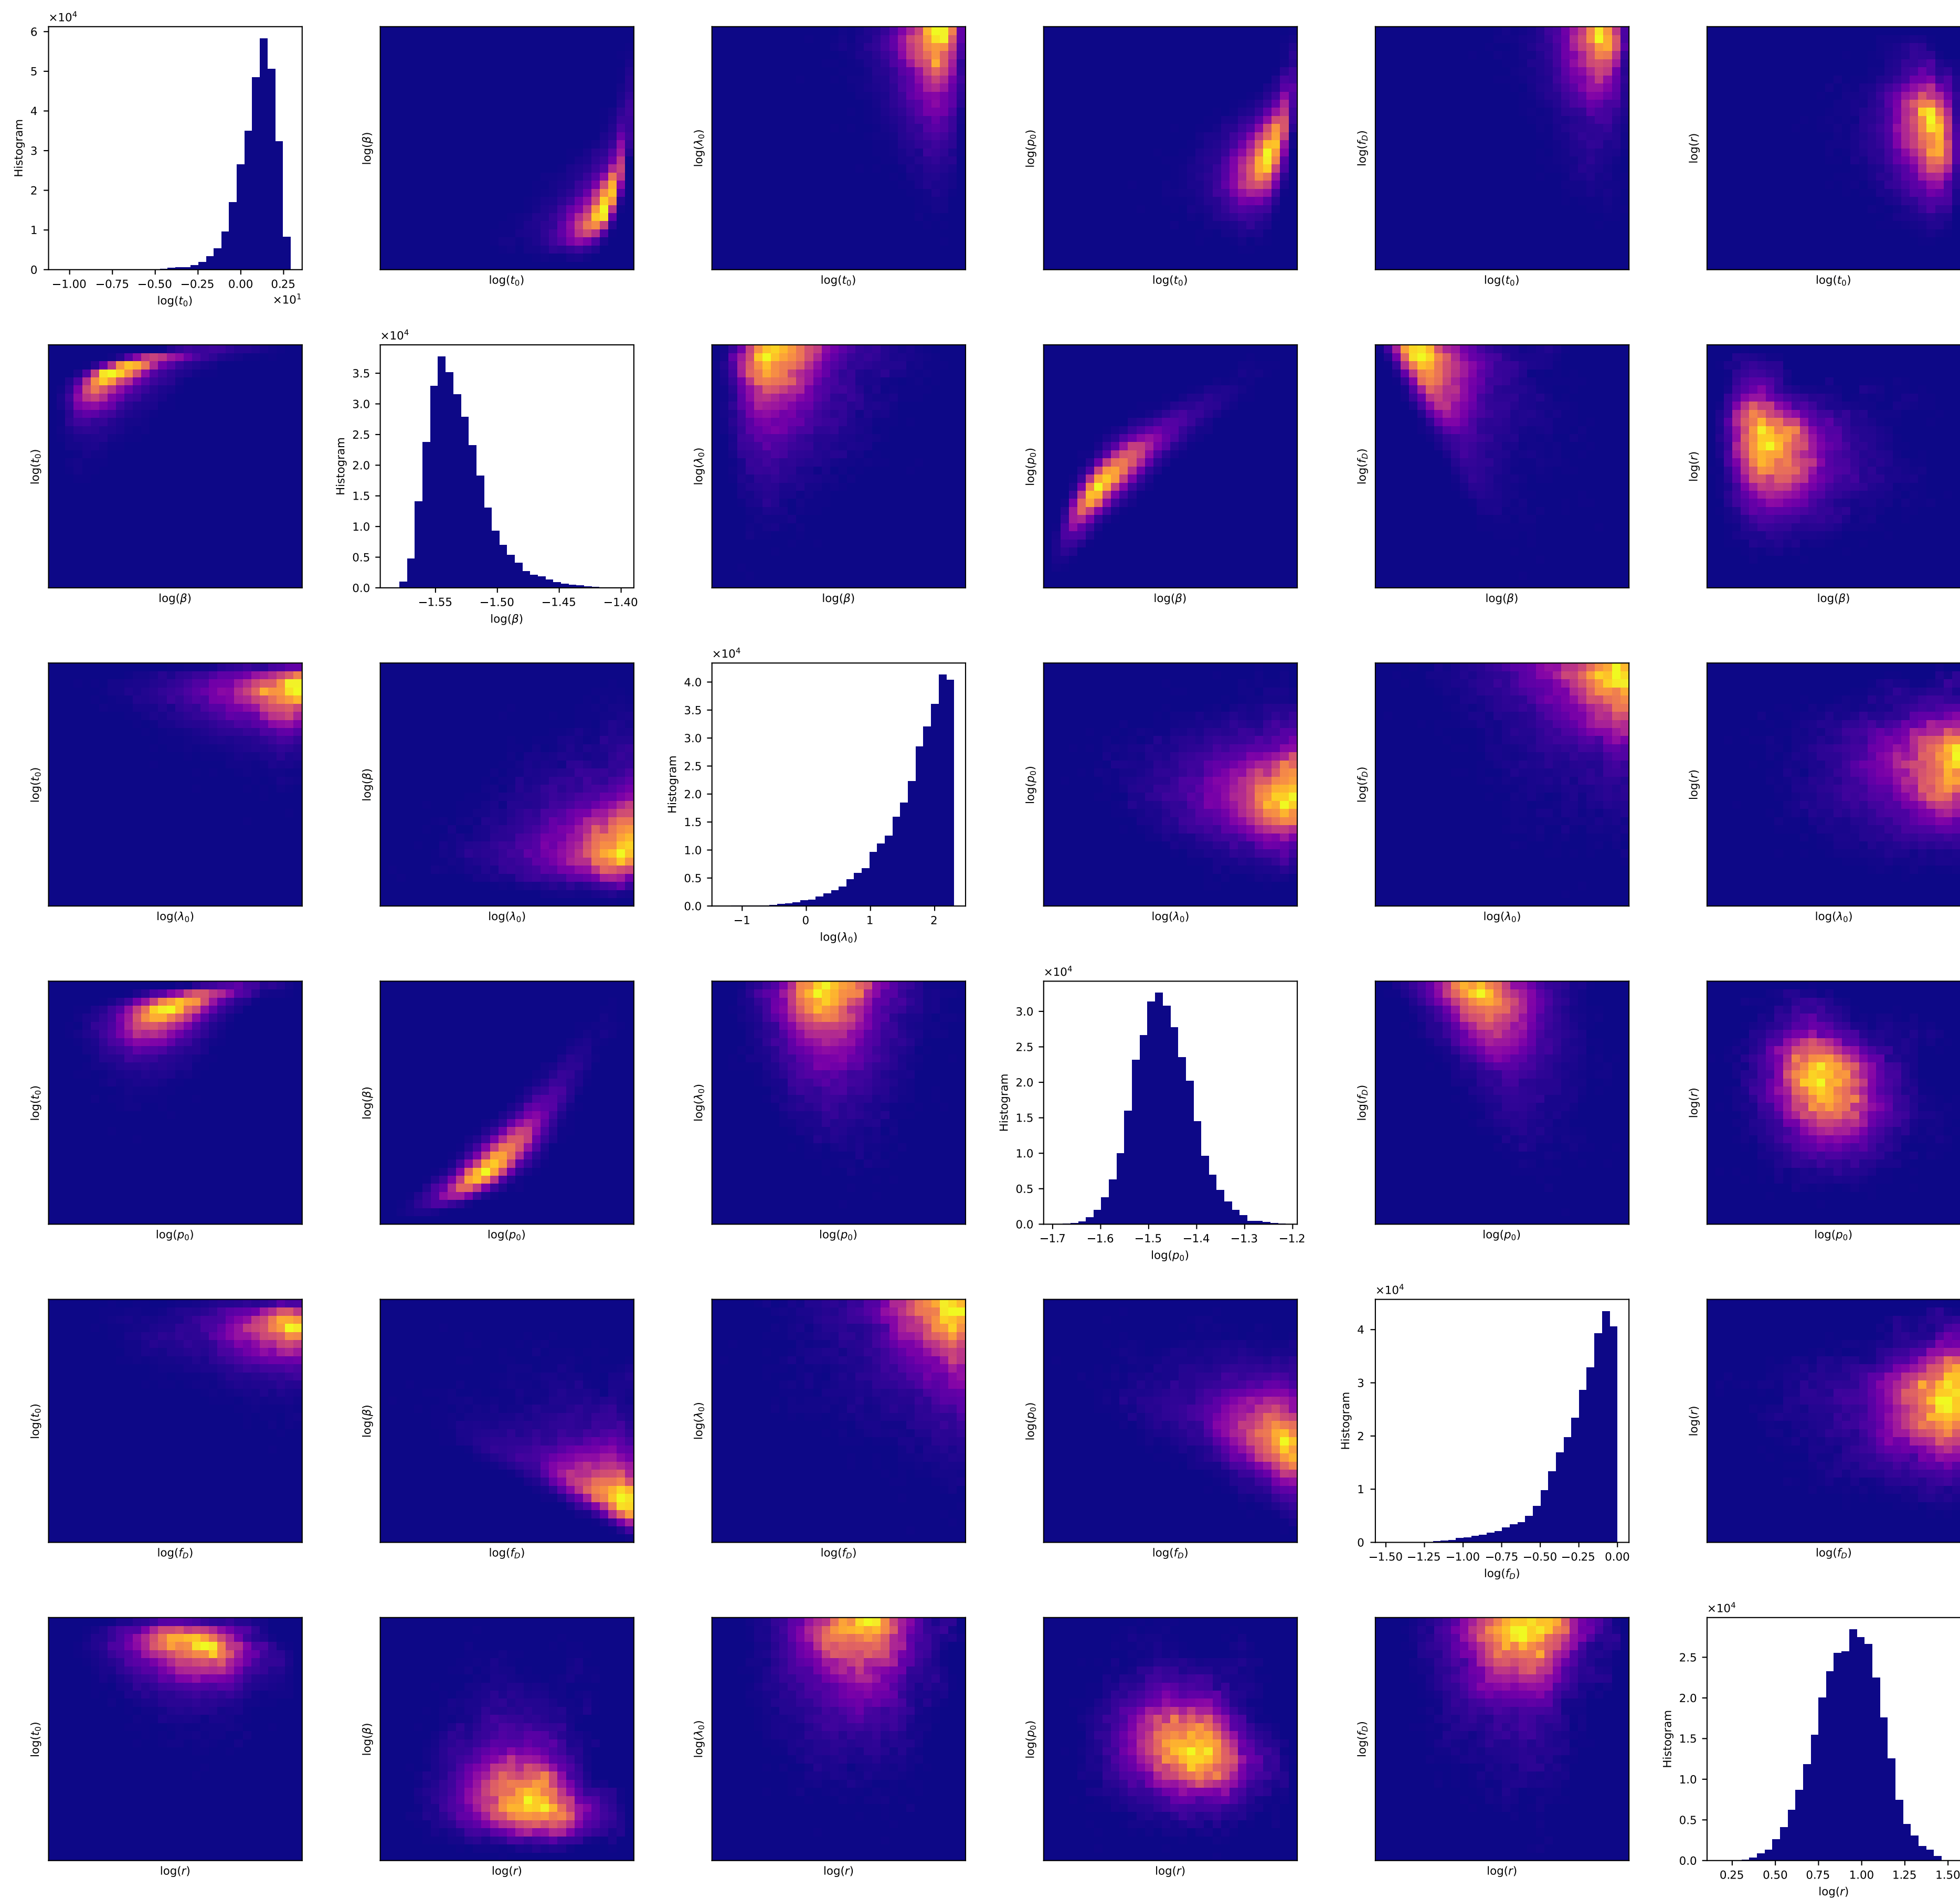



**Figure S5.** Posterior predictive checking. The time-dependent predictive posterior distribution for daily number of COVID-19 cases detected is visualized for all states except New Jersey, Wyoming, Florida, and Alaska, which are considered in Fig 1 of the main text. Inferences are based on daily reports of new COVID-19 cases from January 21 to June 21, 2020 (inclusive dates). The compartmental model [1] accounts for an initial social distancing period followed by  $n$  additional periods. We considered  $n = 0, 1$  and  $2$  and selected the best  $n$  using the model selection procedure of Lin et al. [1]. Crosses indicate observed daily case reports. The shaded region indicates the prediction uncertainty and inferred noise in detection of new cases. The color-coded bands within the shaded region indicate the median and different credible intervals (e.g., dark purple corresponds to the median, the lightest shade of yellow corresponds to the 95% credible interval, and gradations of color between these two extremes correspond to different credible intervals as indicated in the legend). In each panel, the vertical broken line indicates the onset time of the first social-distancing period. For states with  $n = 1$ , there is an additional (rightmost) broken line, which indicates the onset time of the second social-distancing period. The model was used to make forecasts of new case detection for 14 days after June 21, 2020. The last prediction date was July 5, 2020.

# Alabama

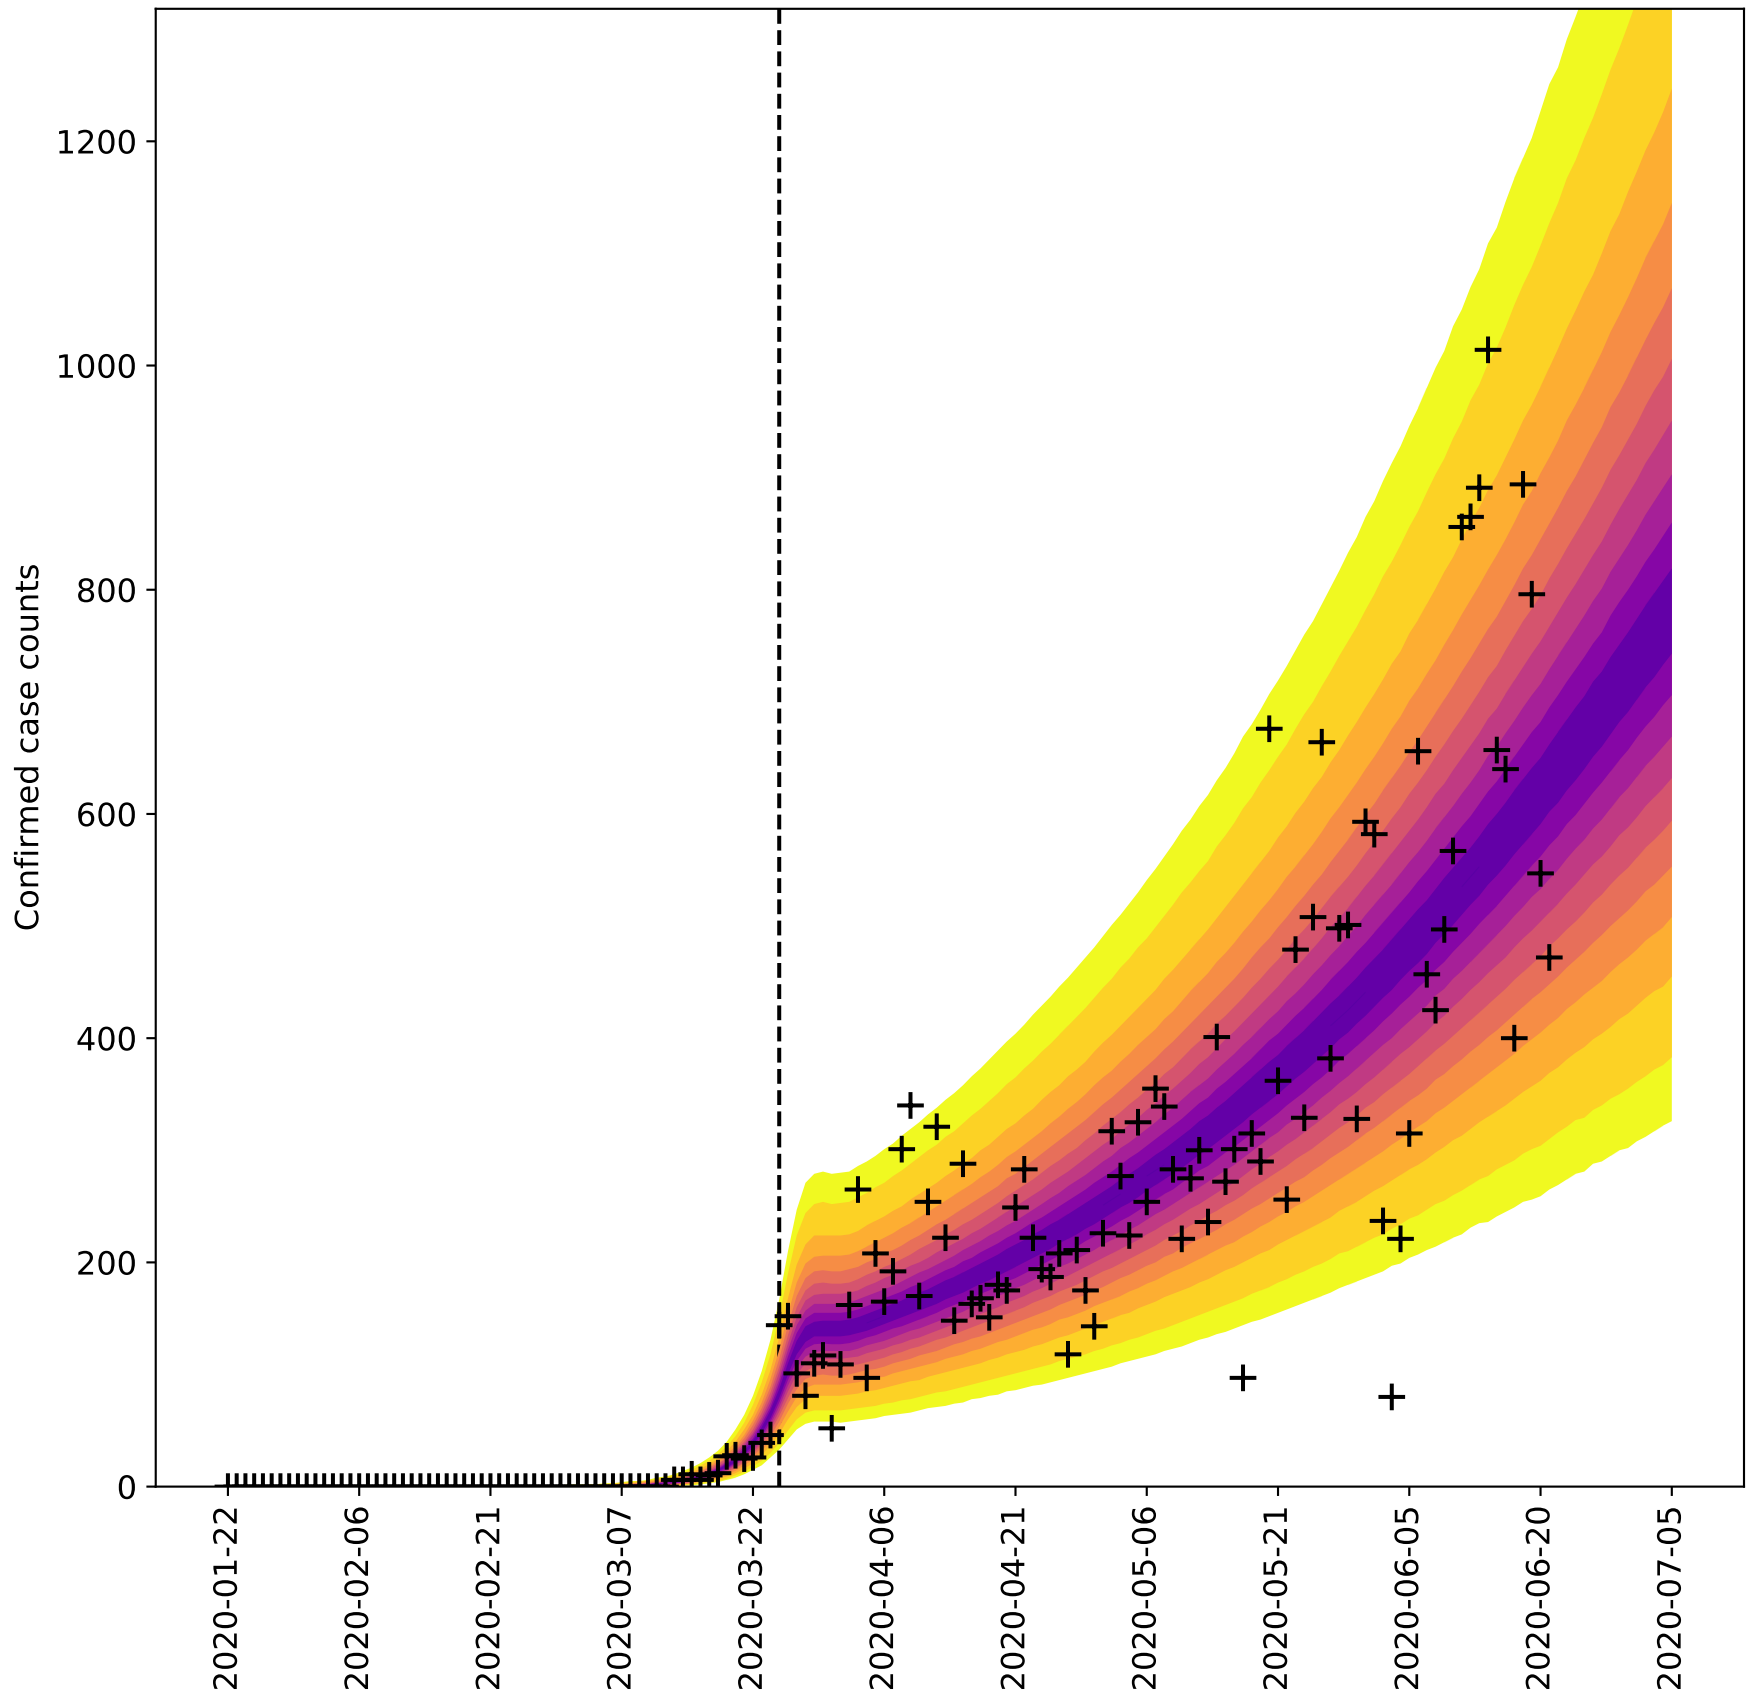

# Arizona

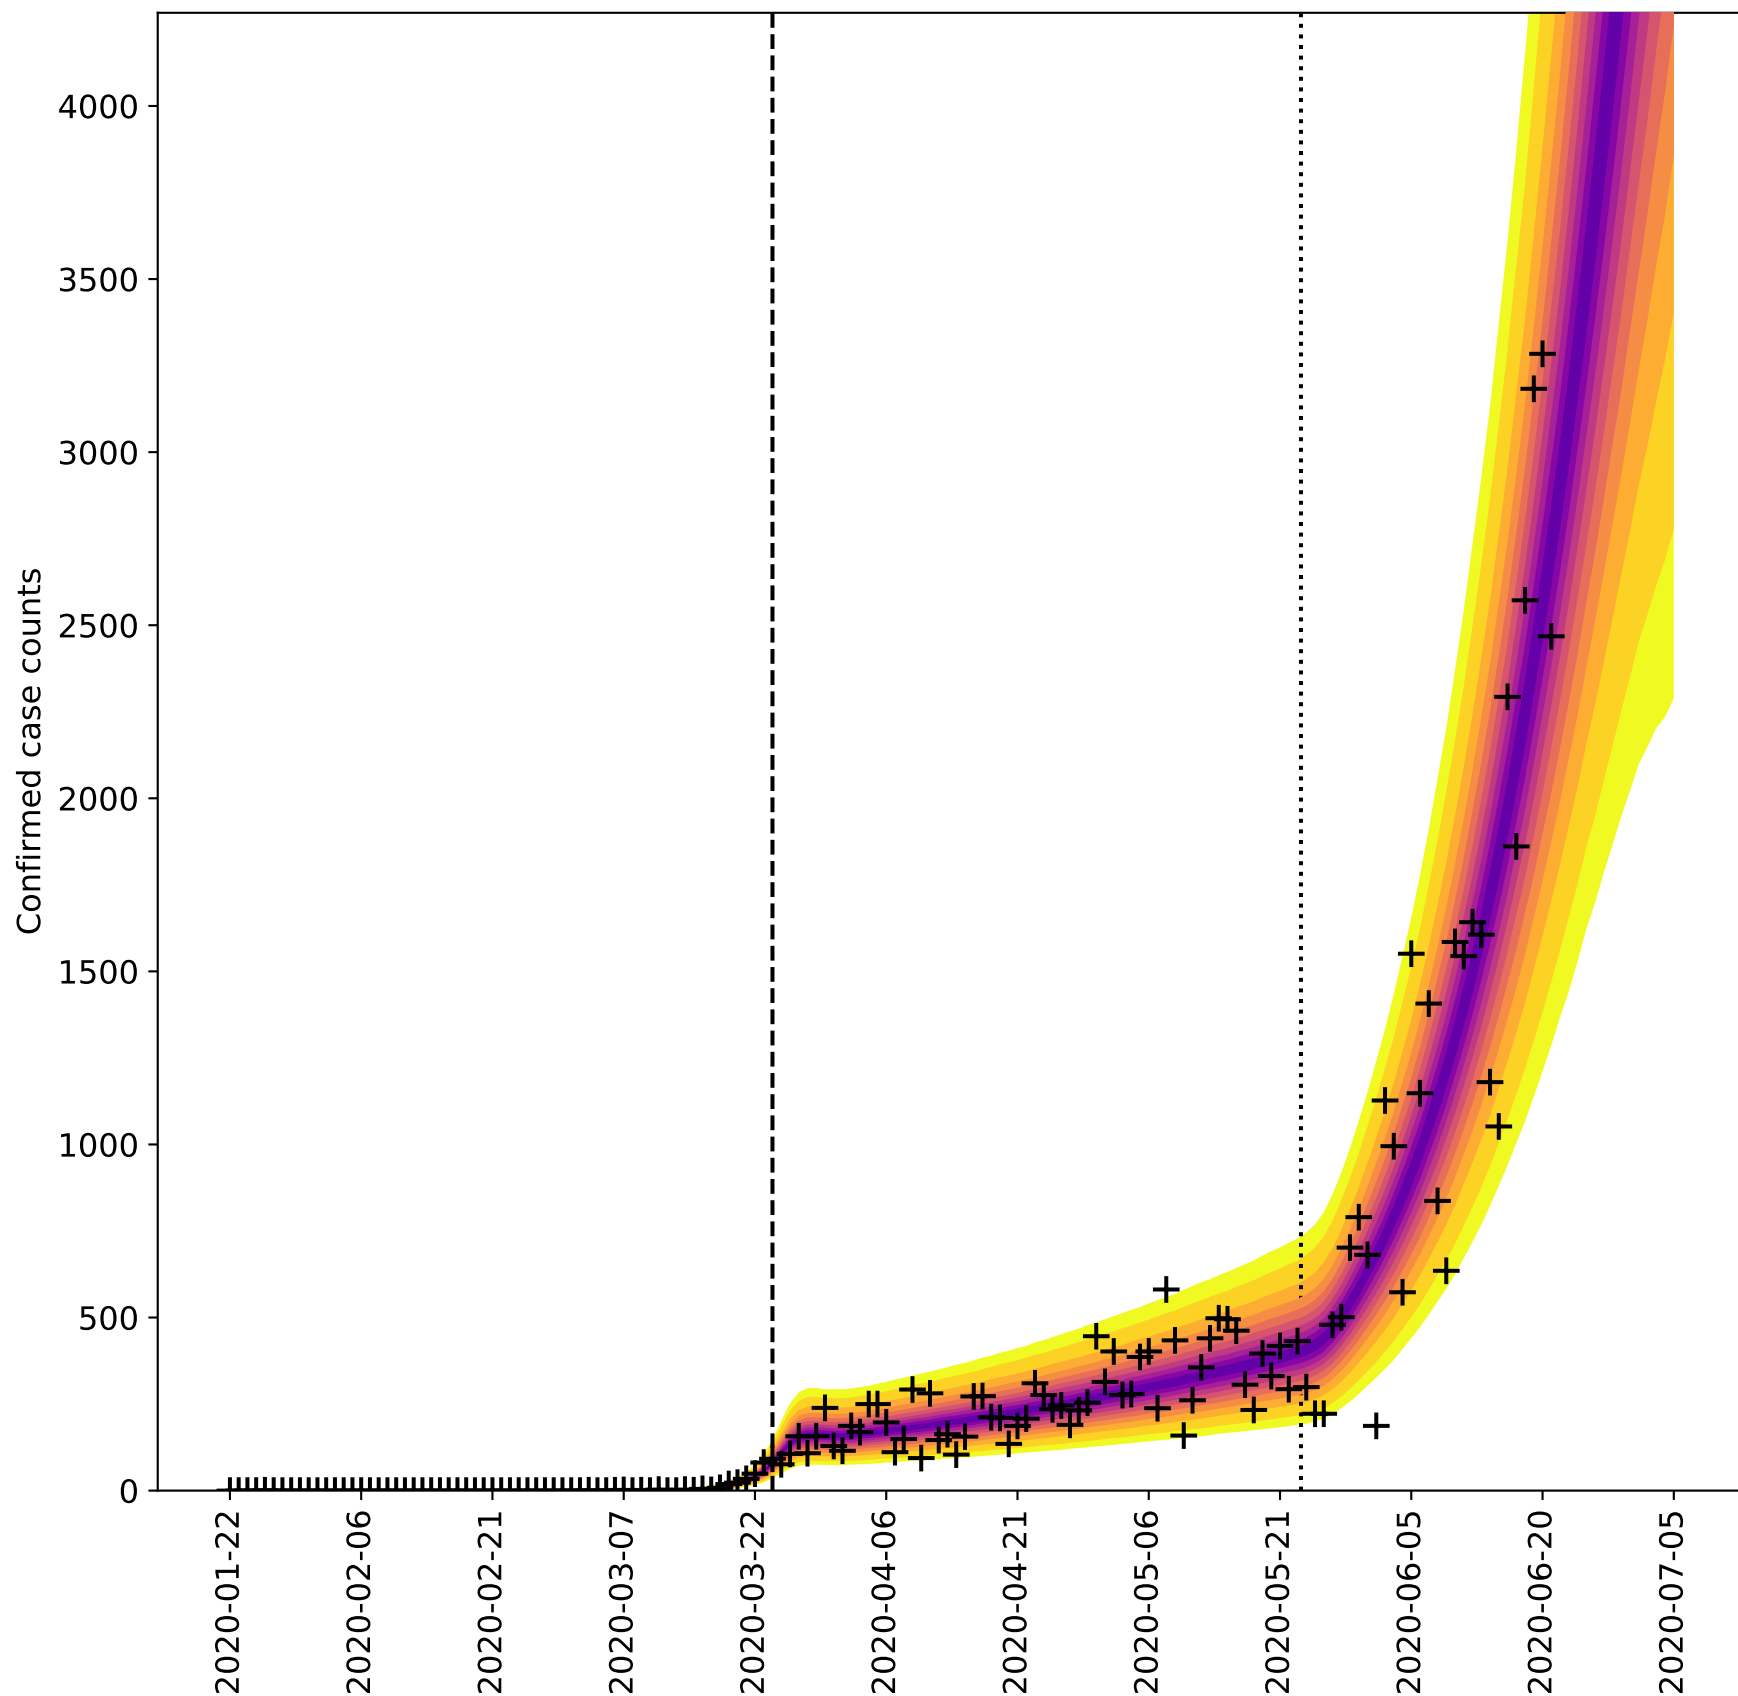

# Arkansas

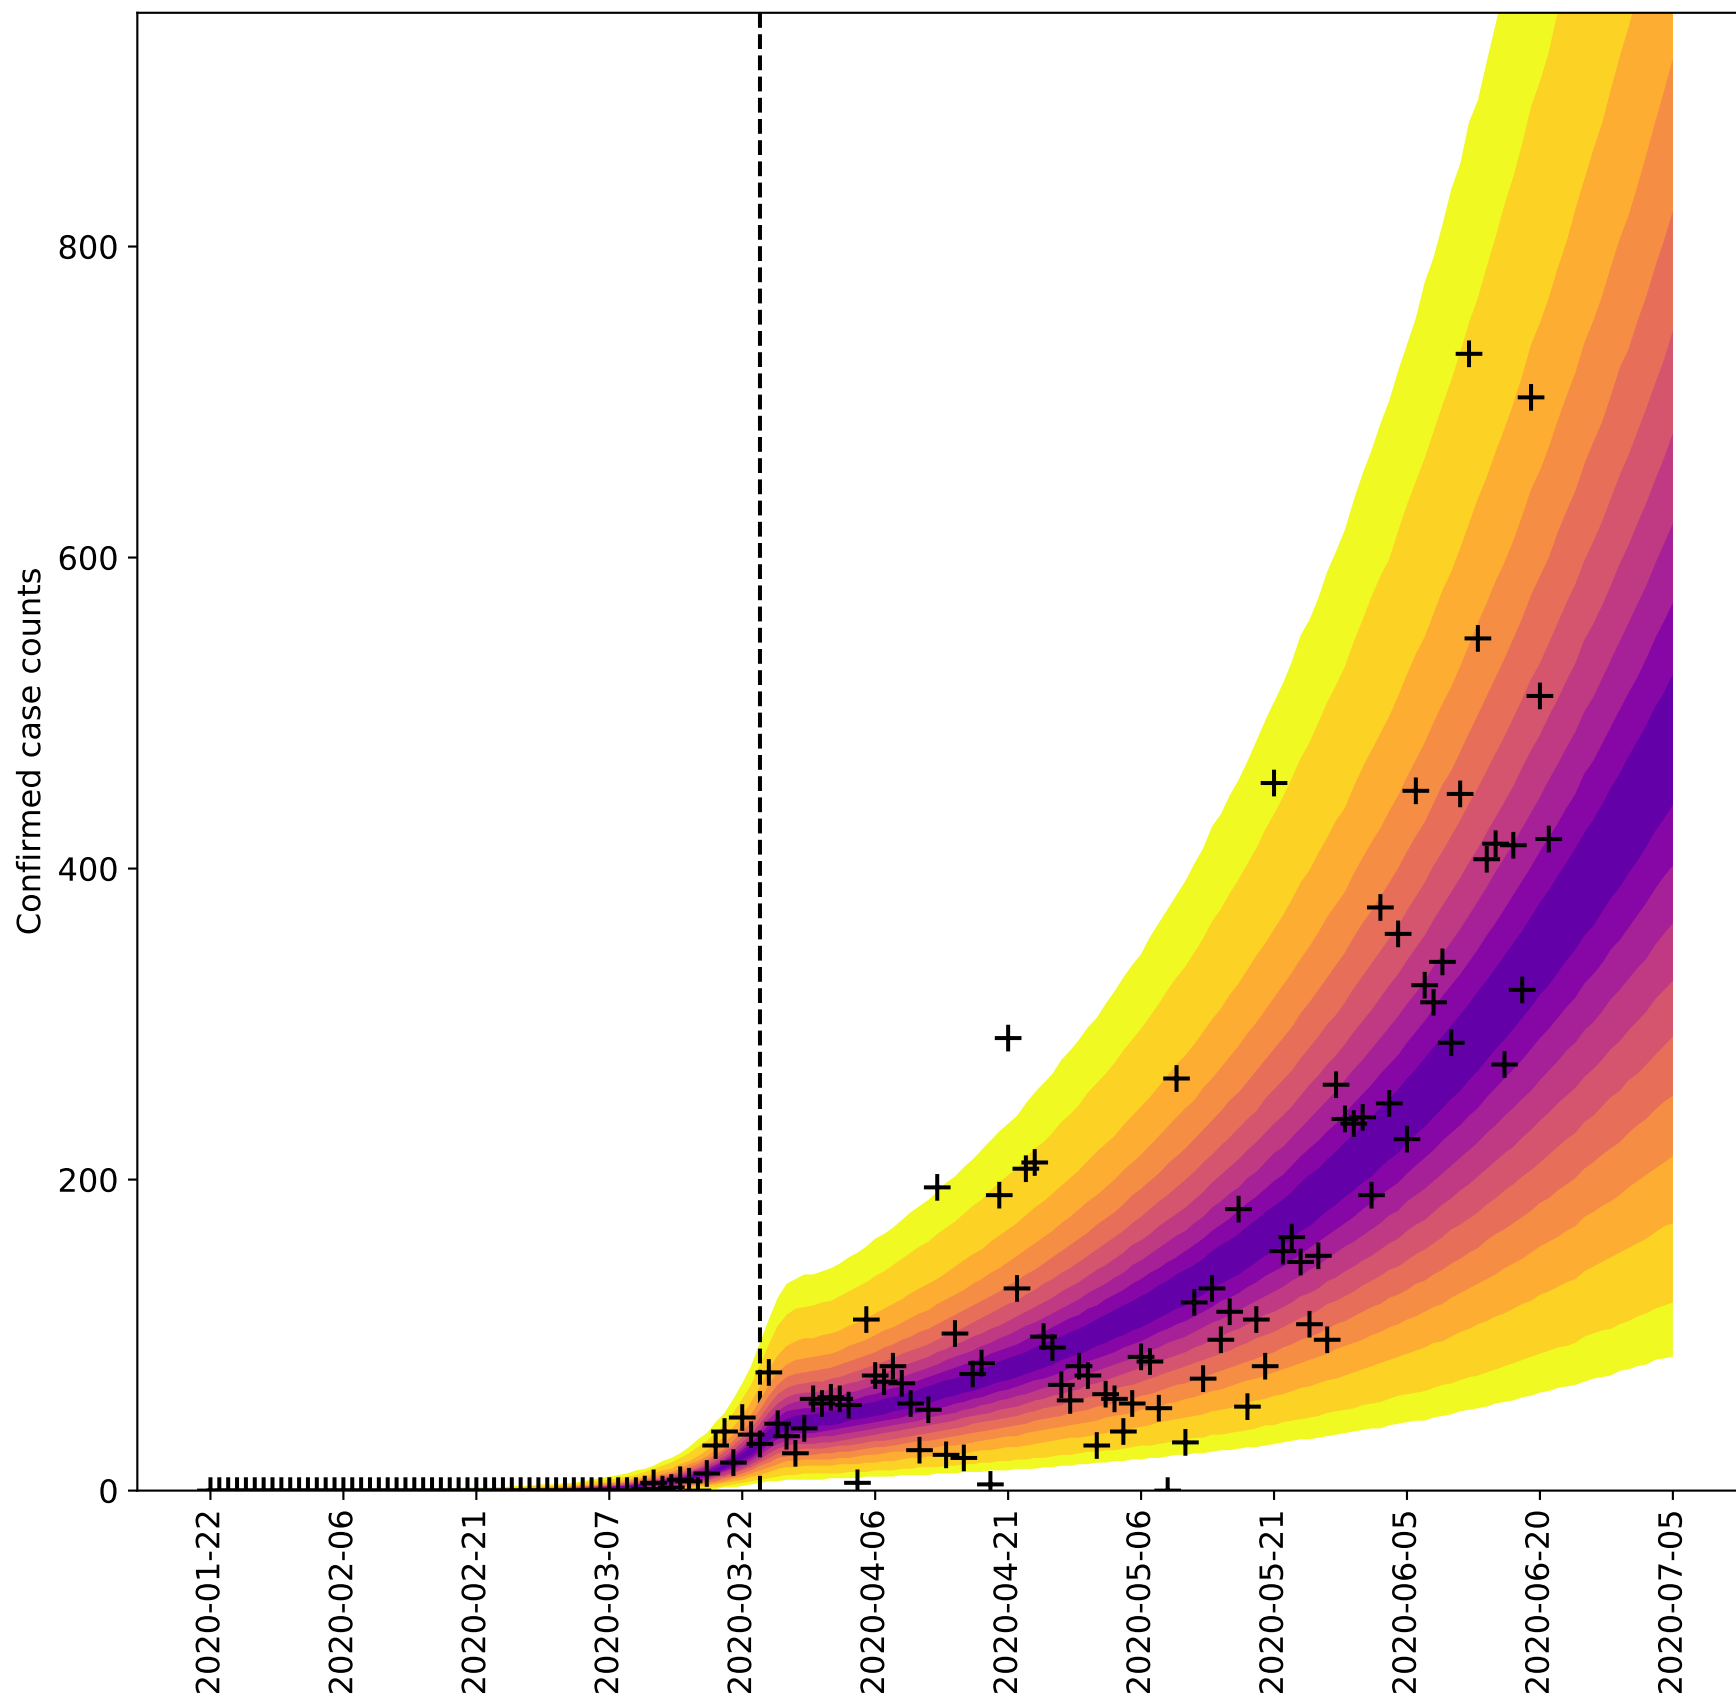

# California

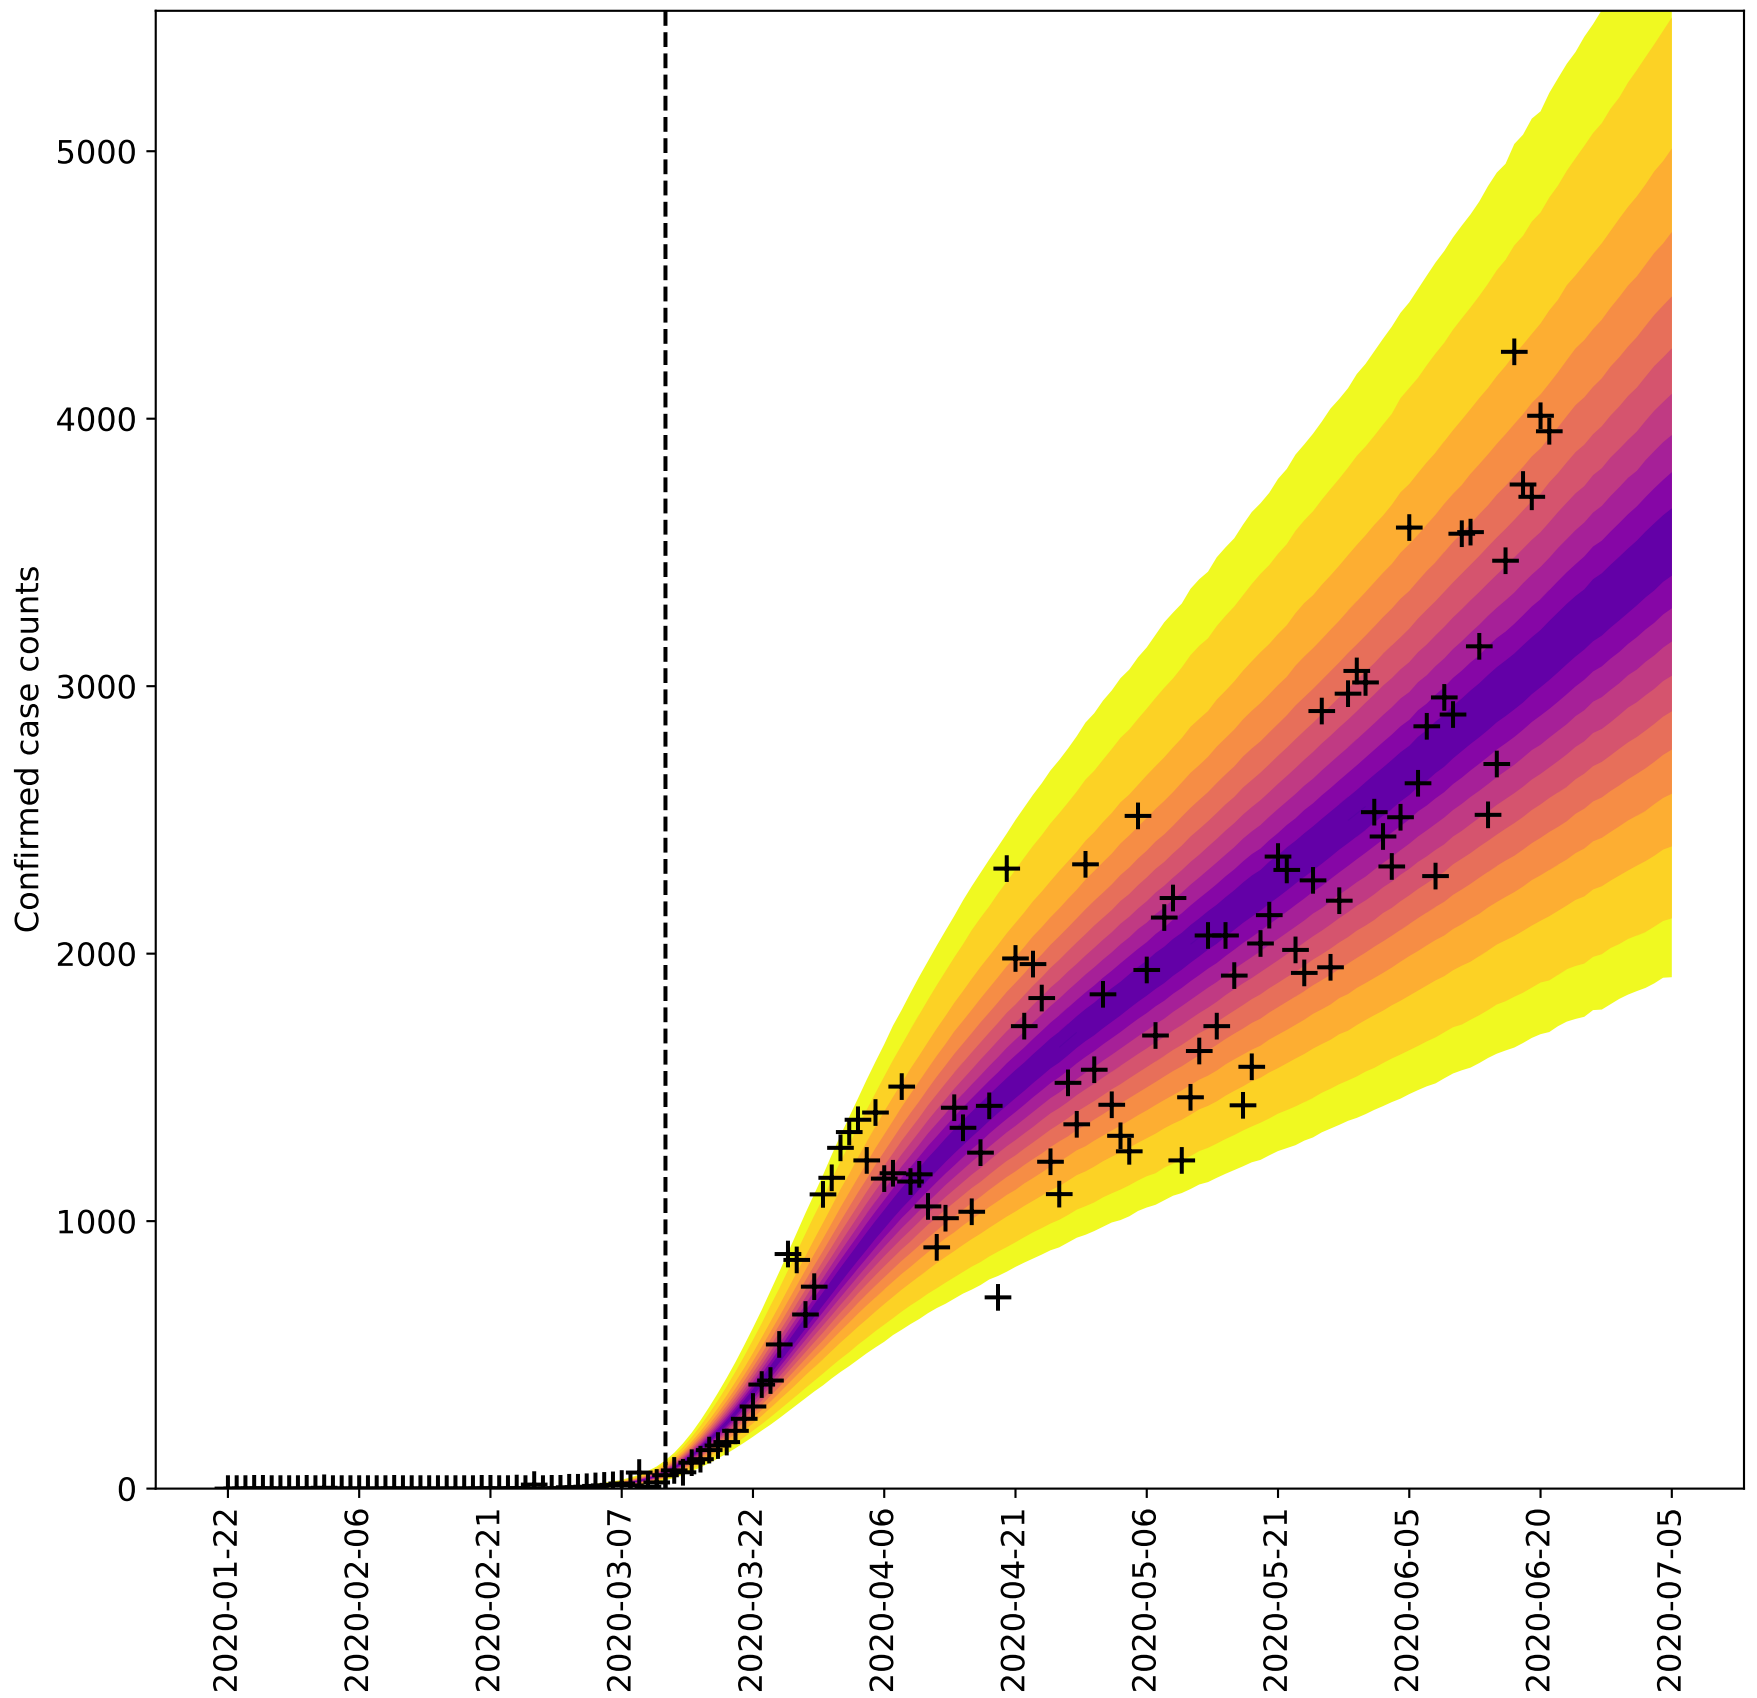

# Colorado

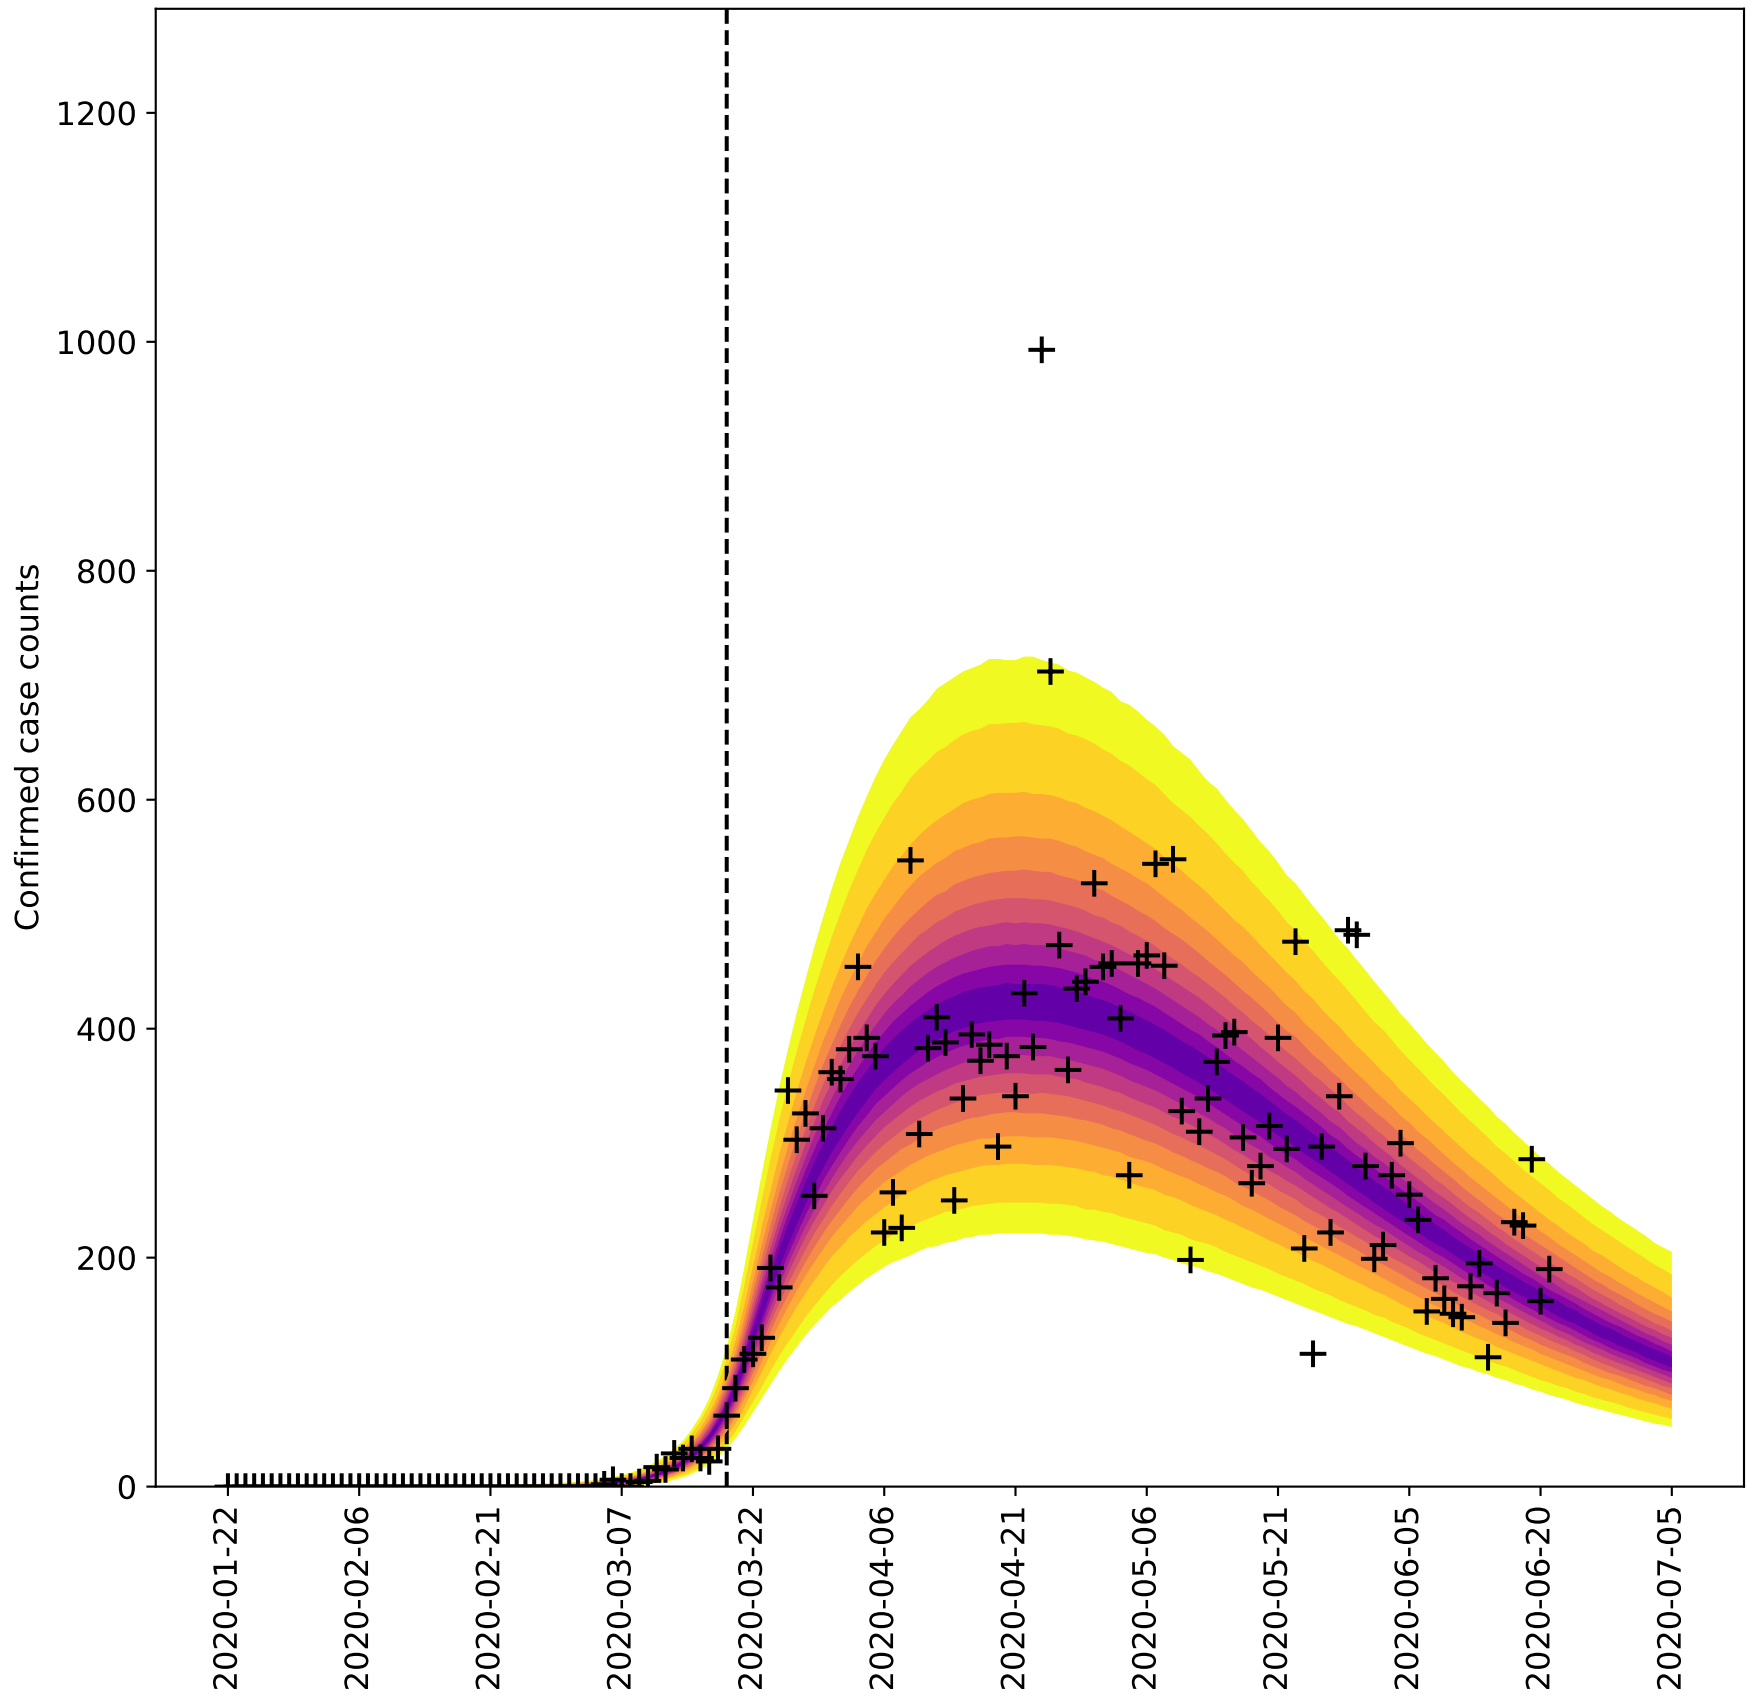

# Connecticut

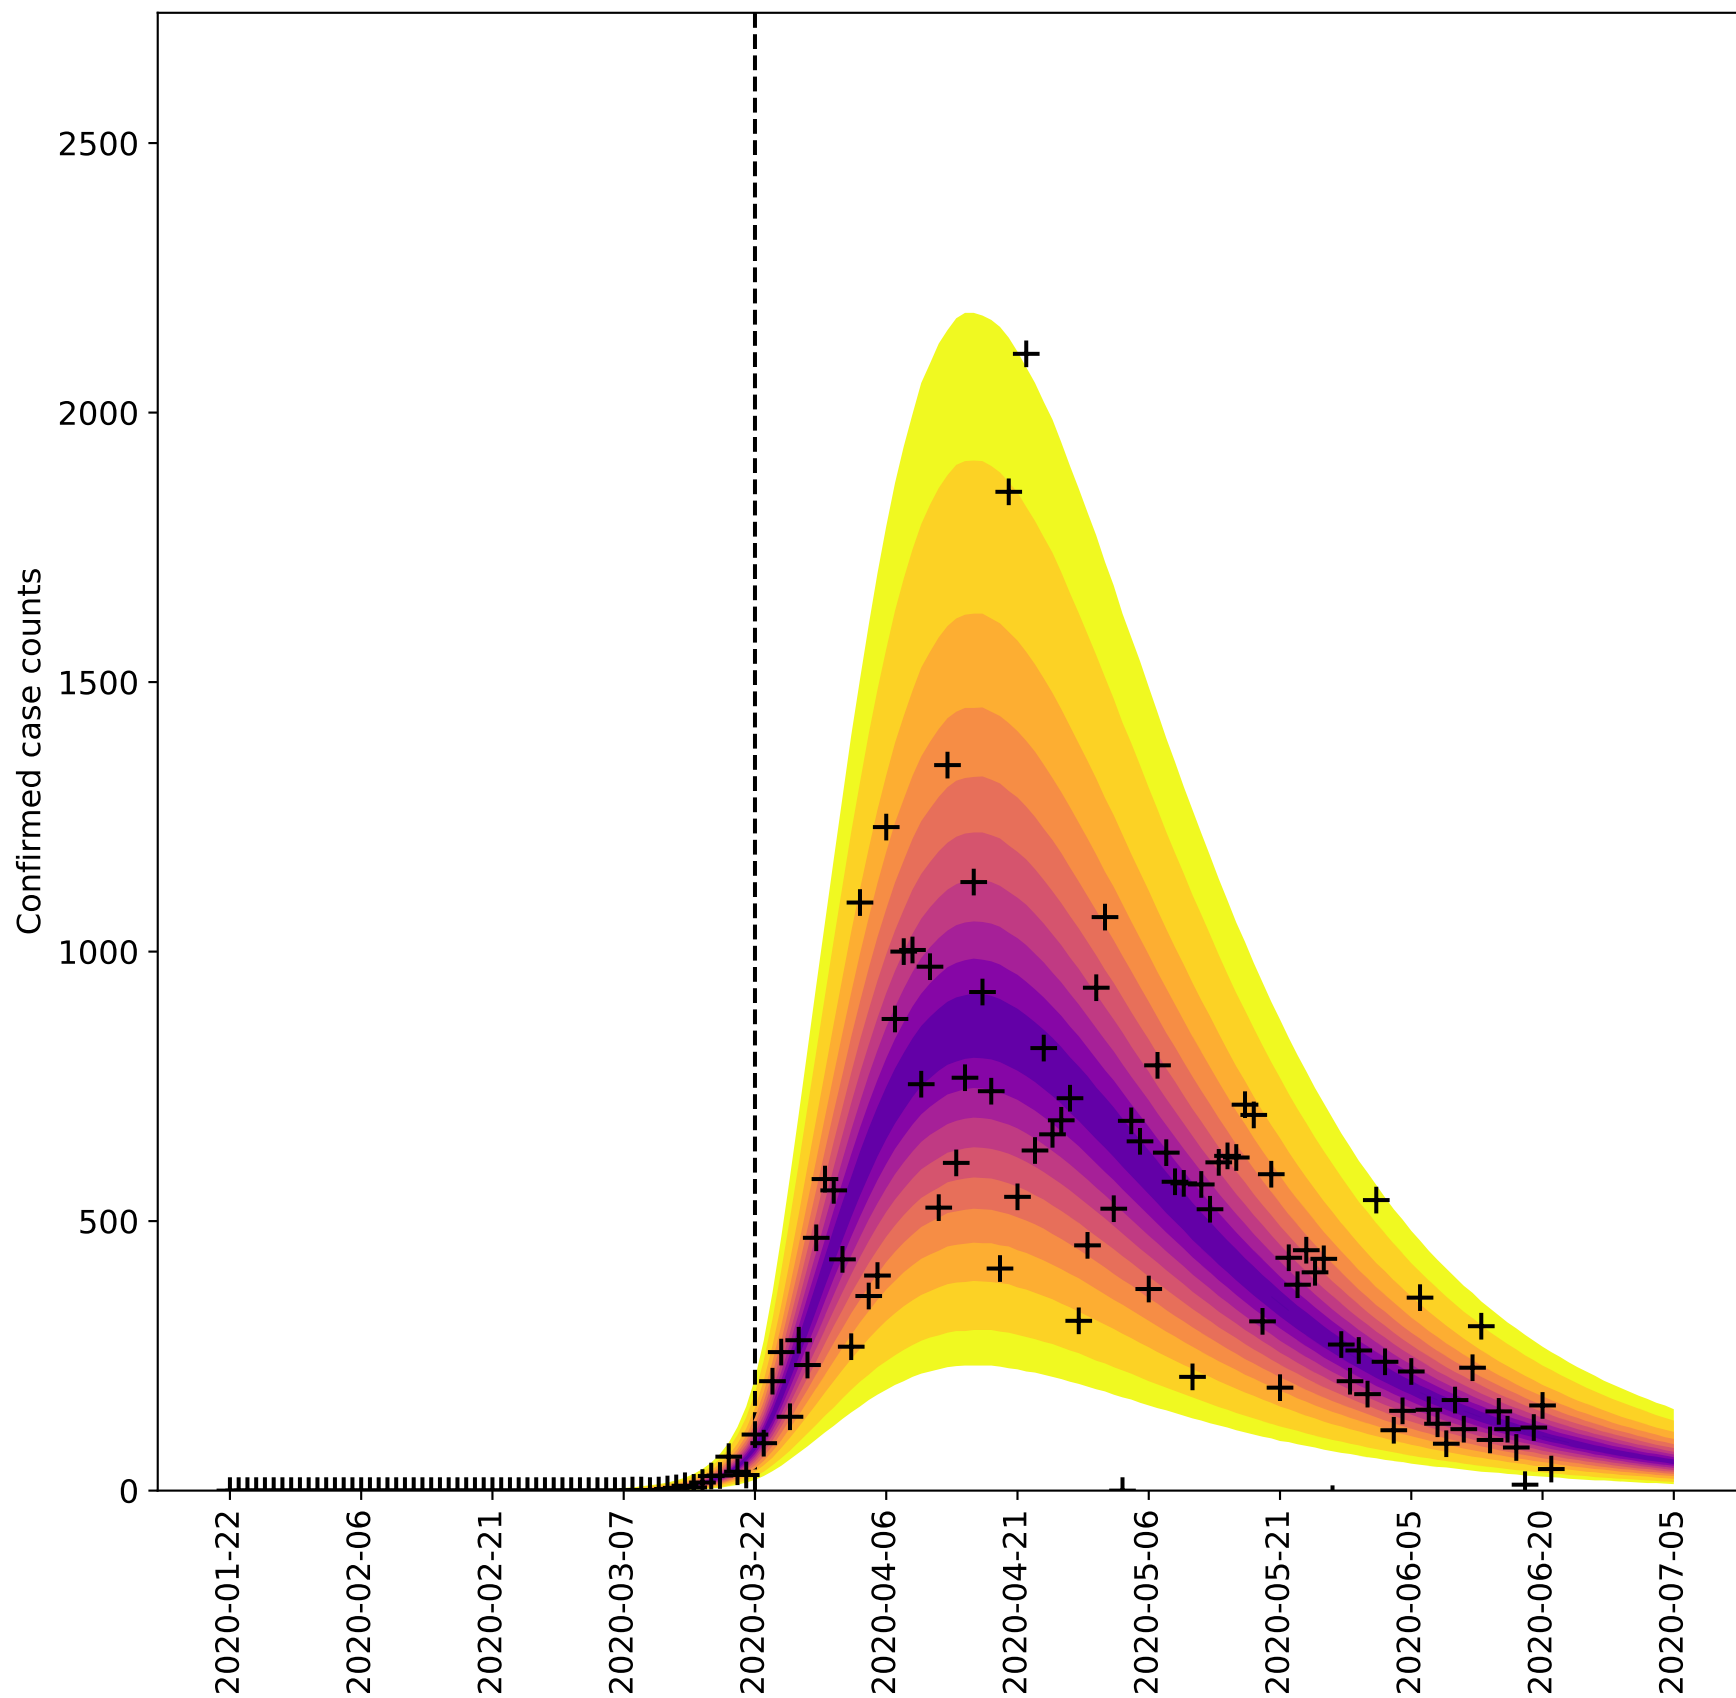

# Delaware

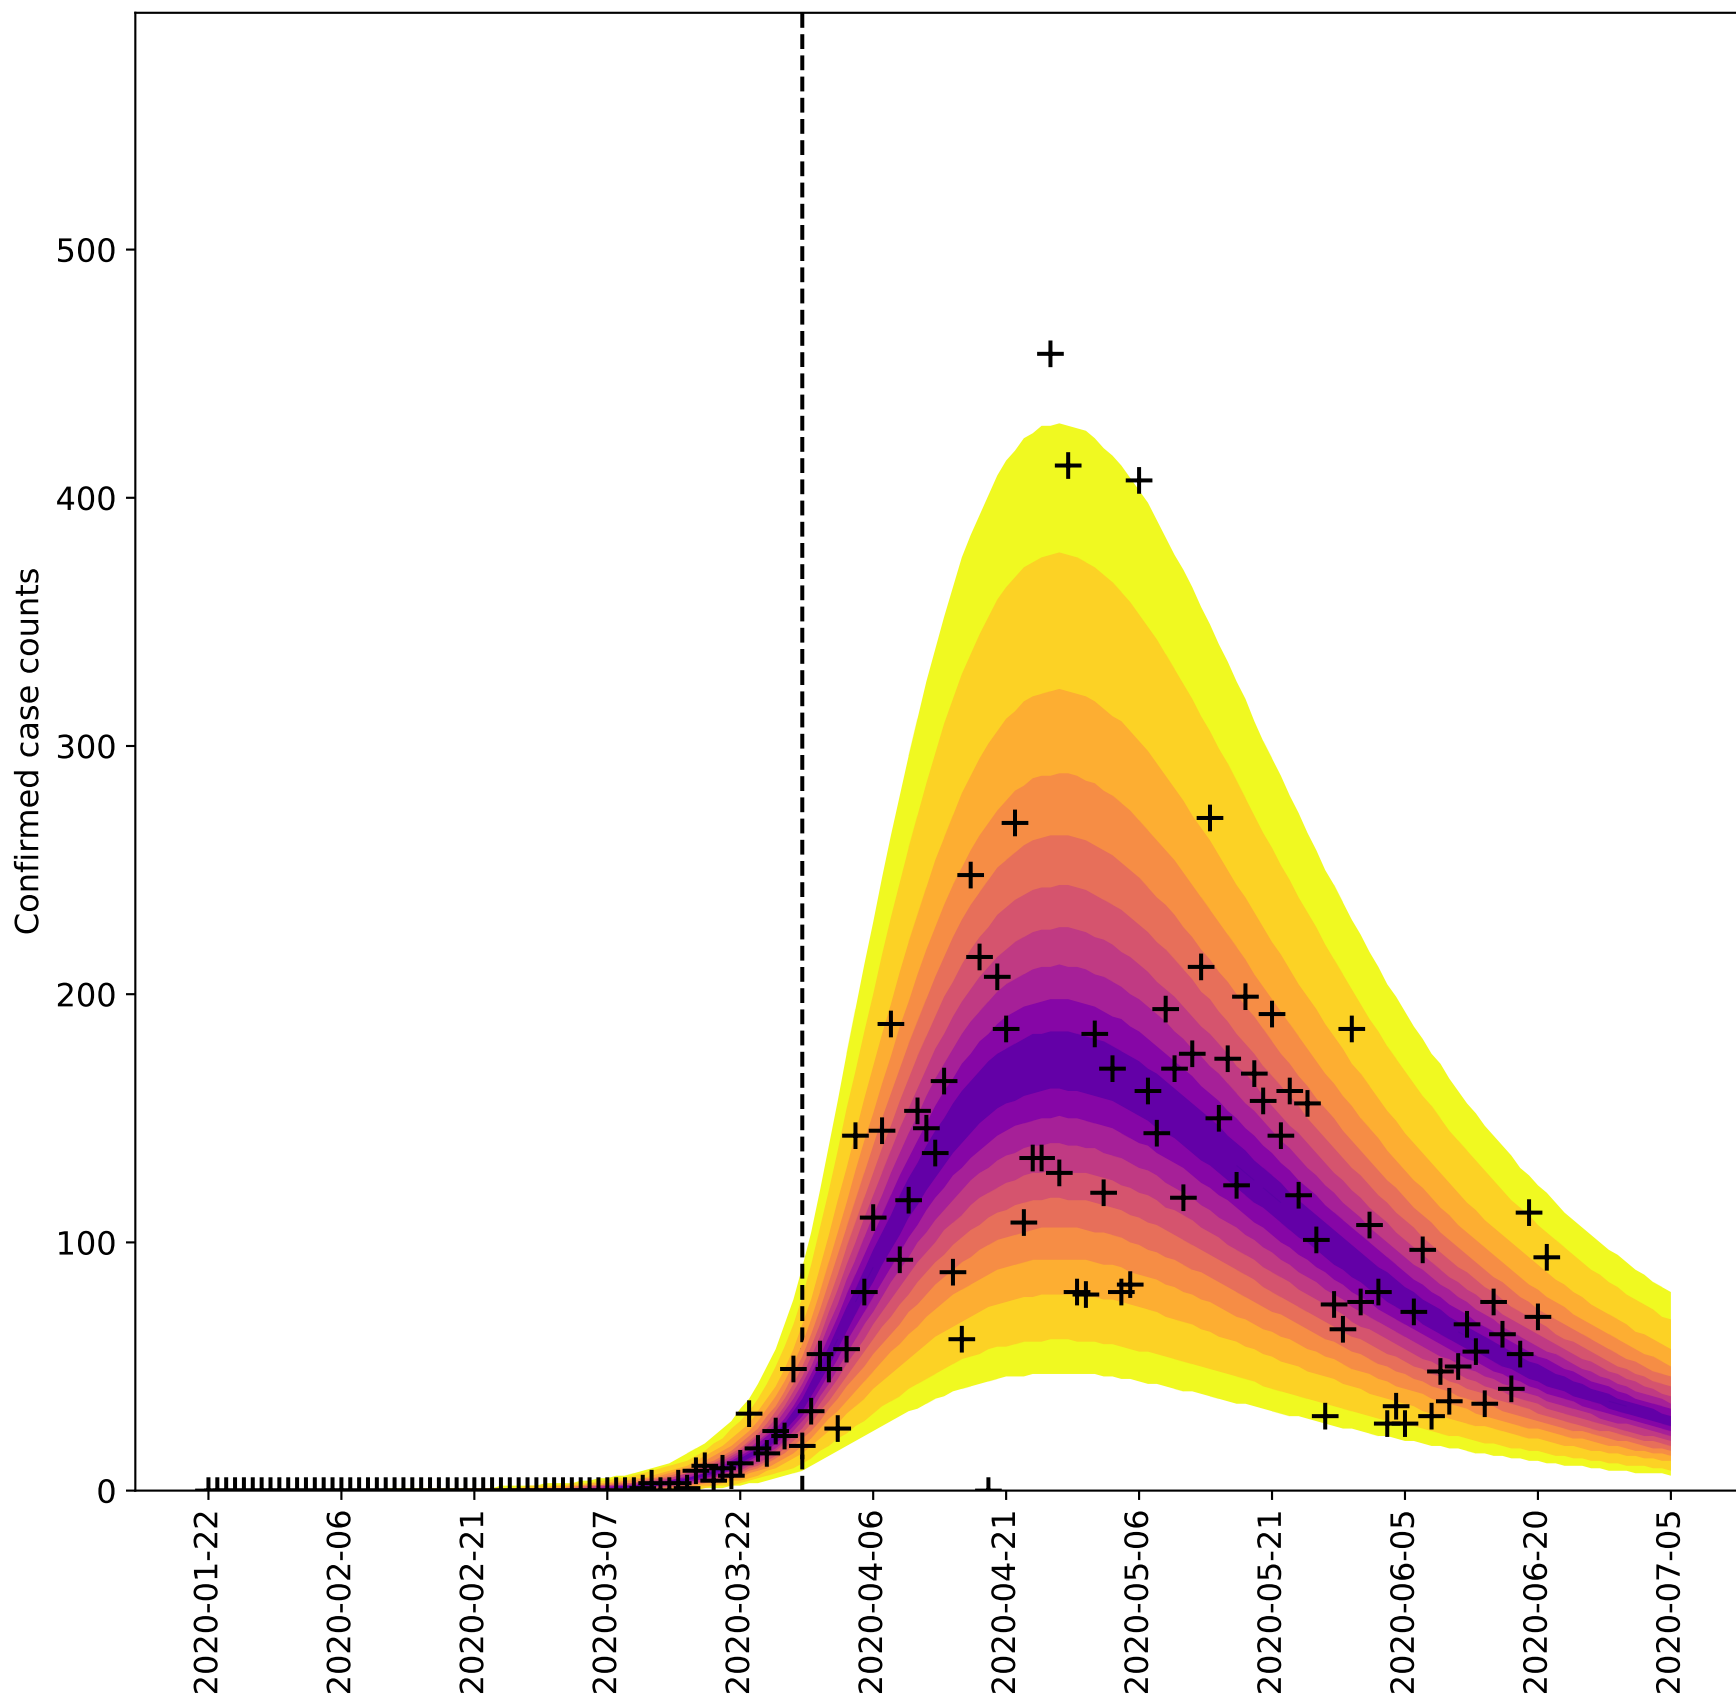



# Georgia

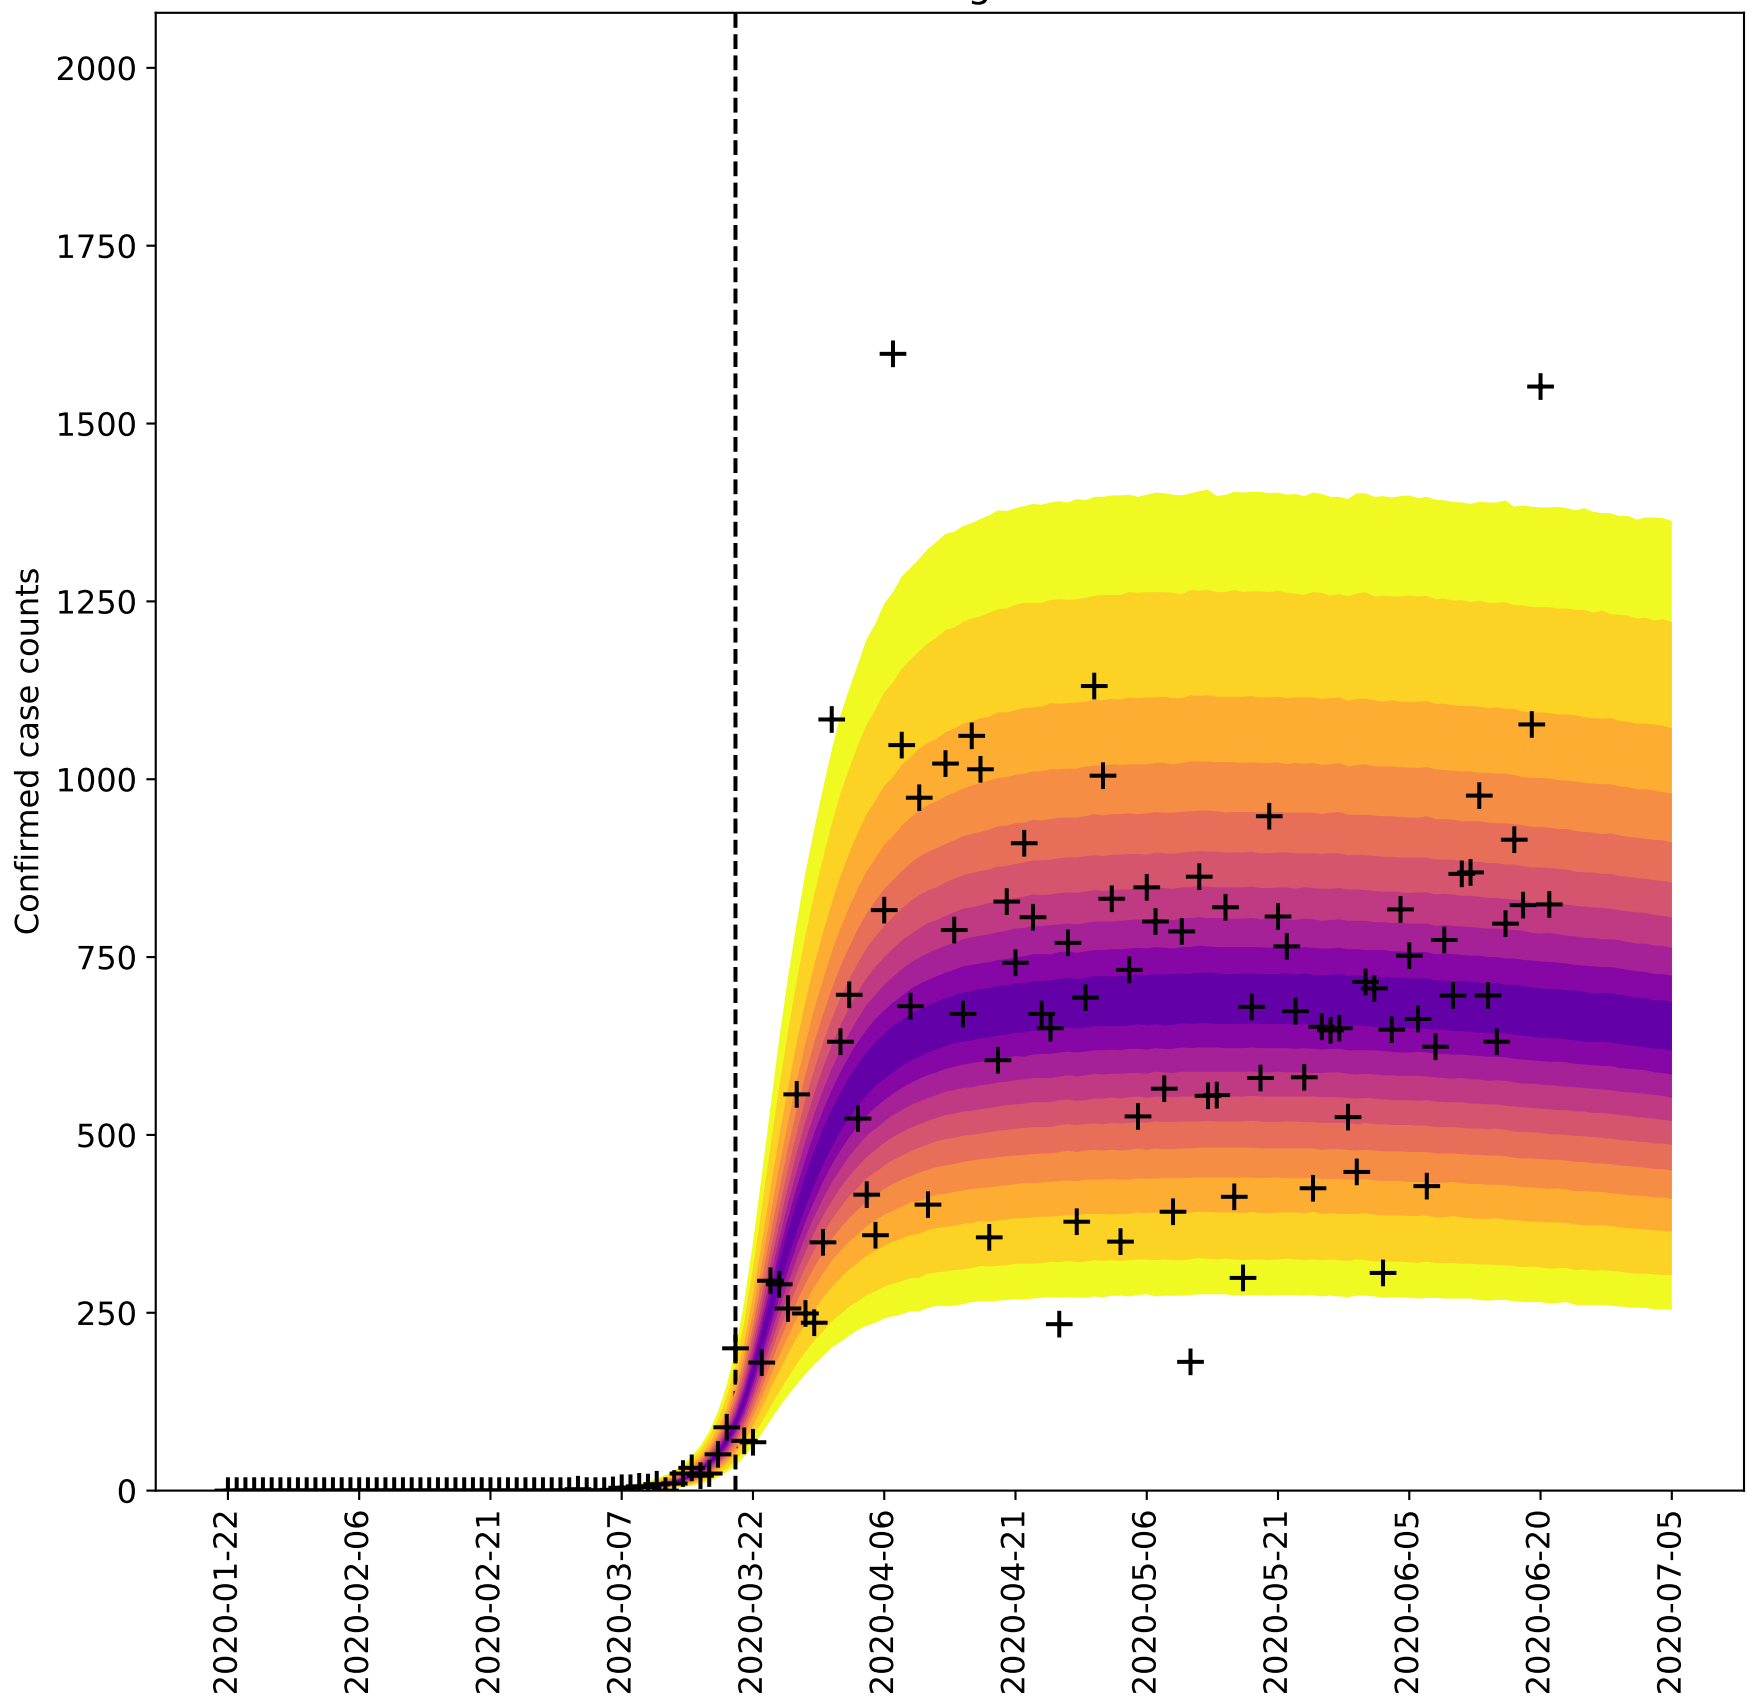

# Hawaii

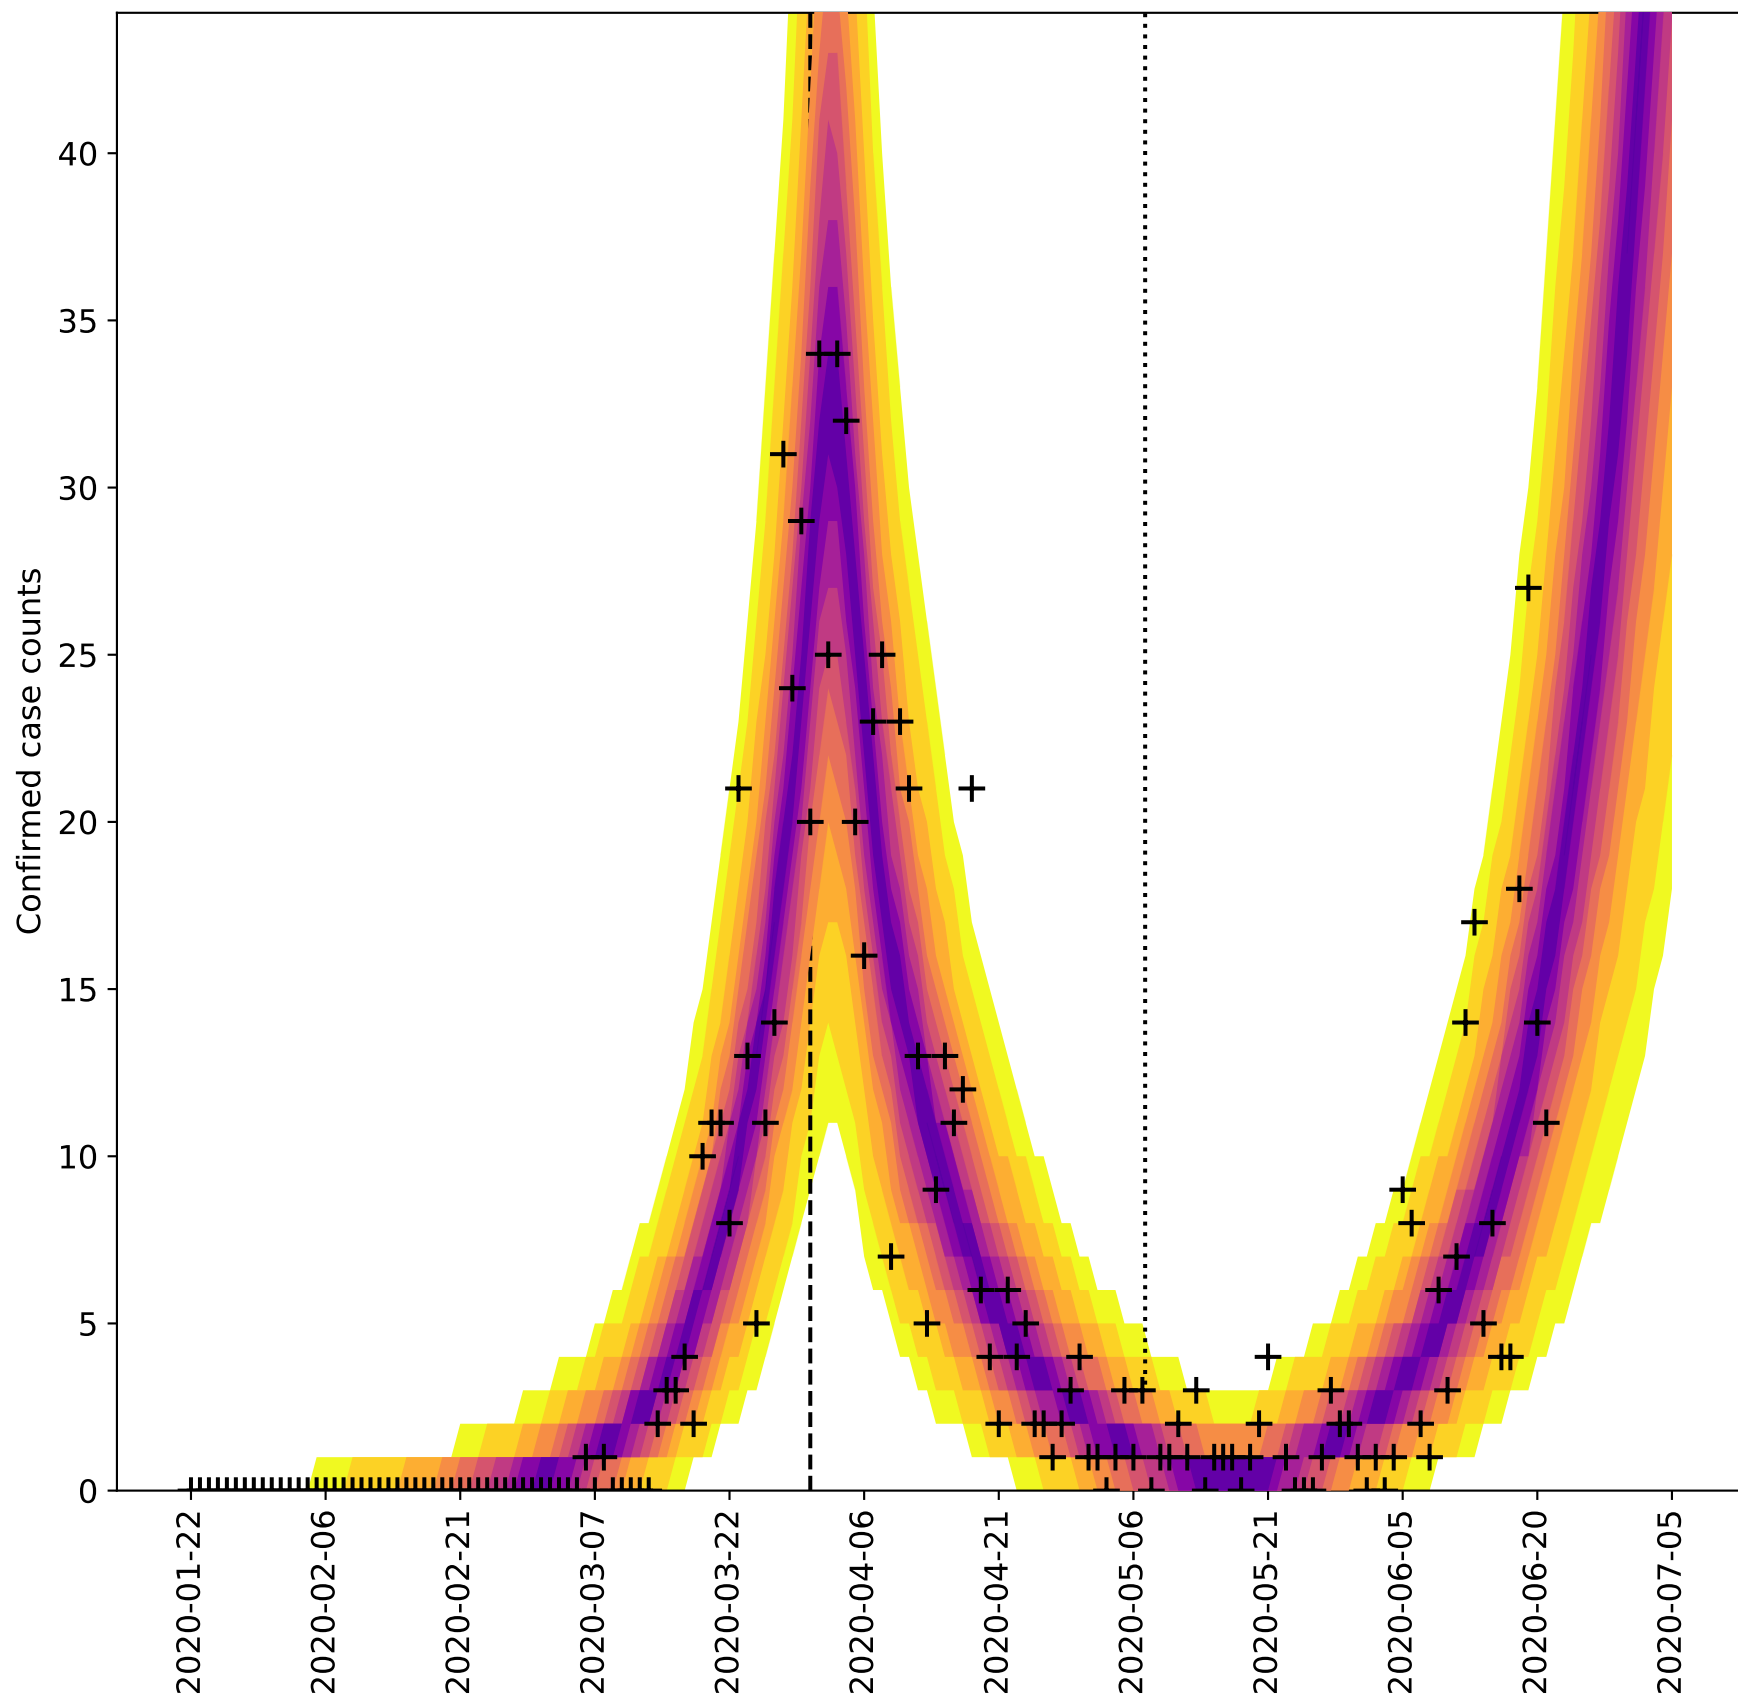

# Idaho

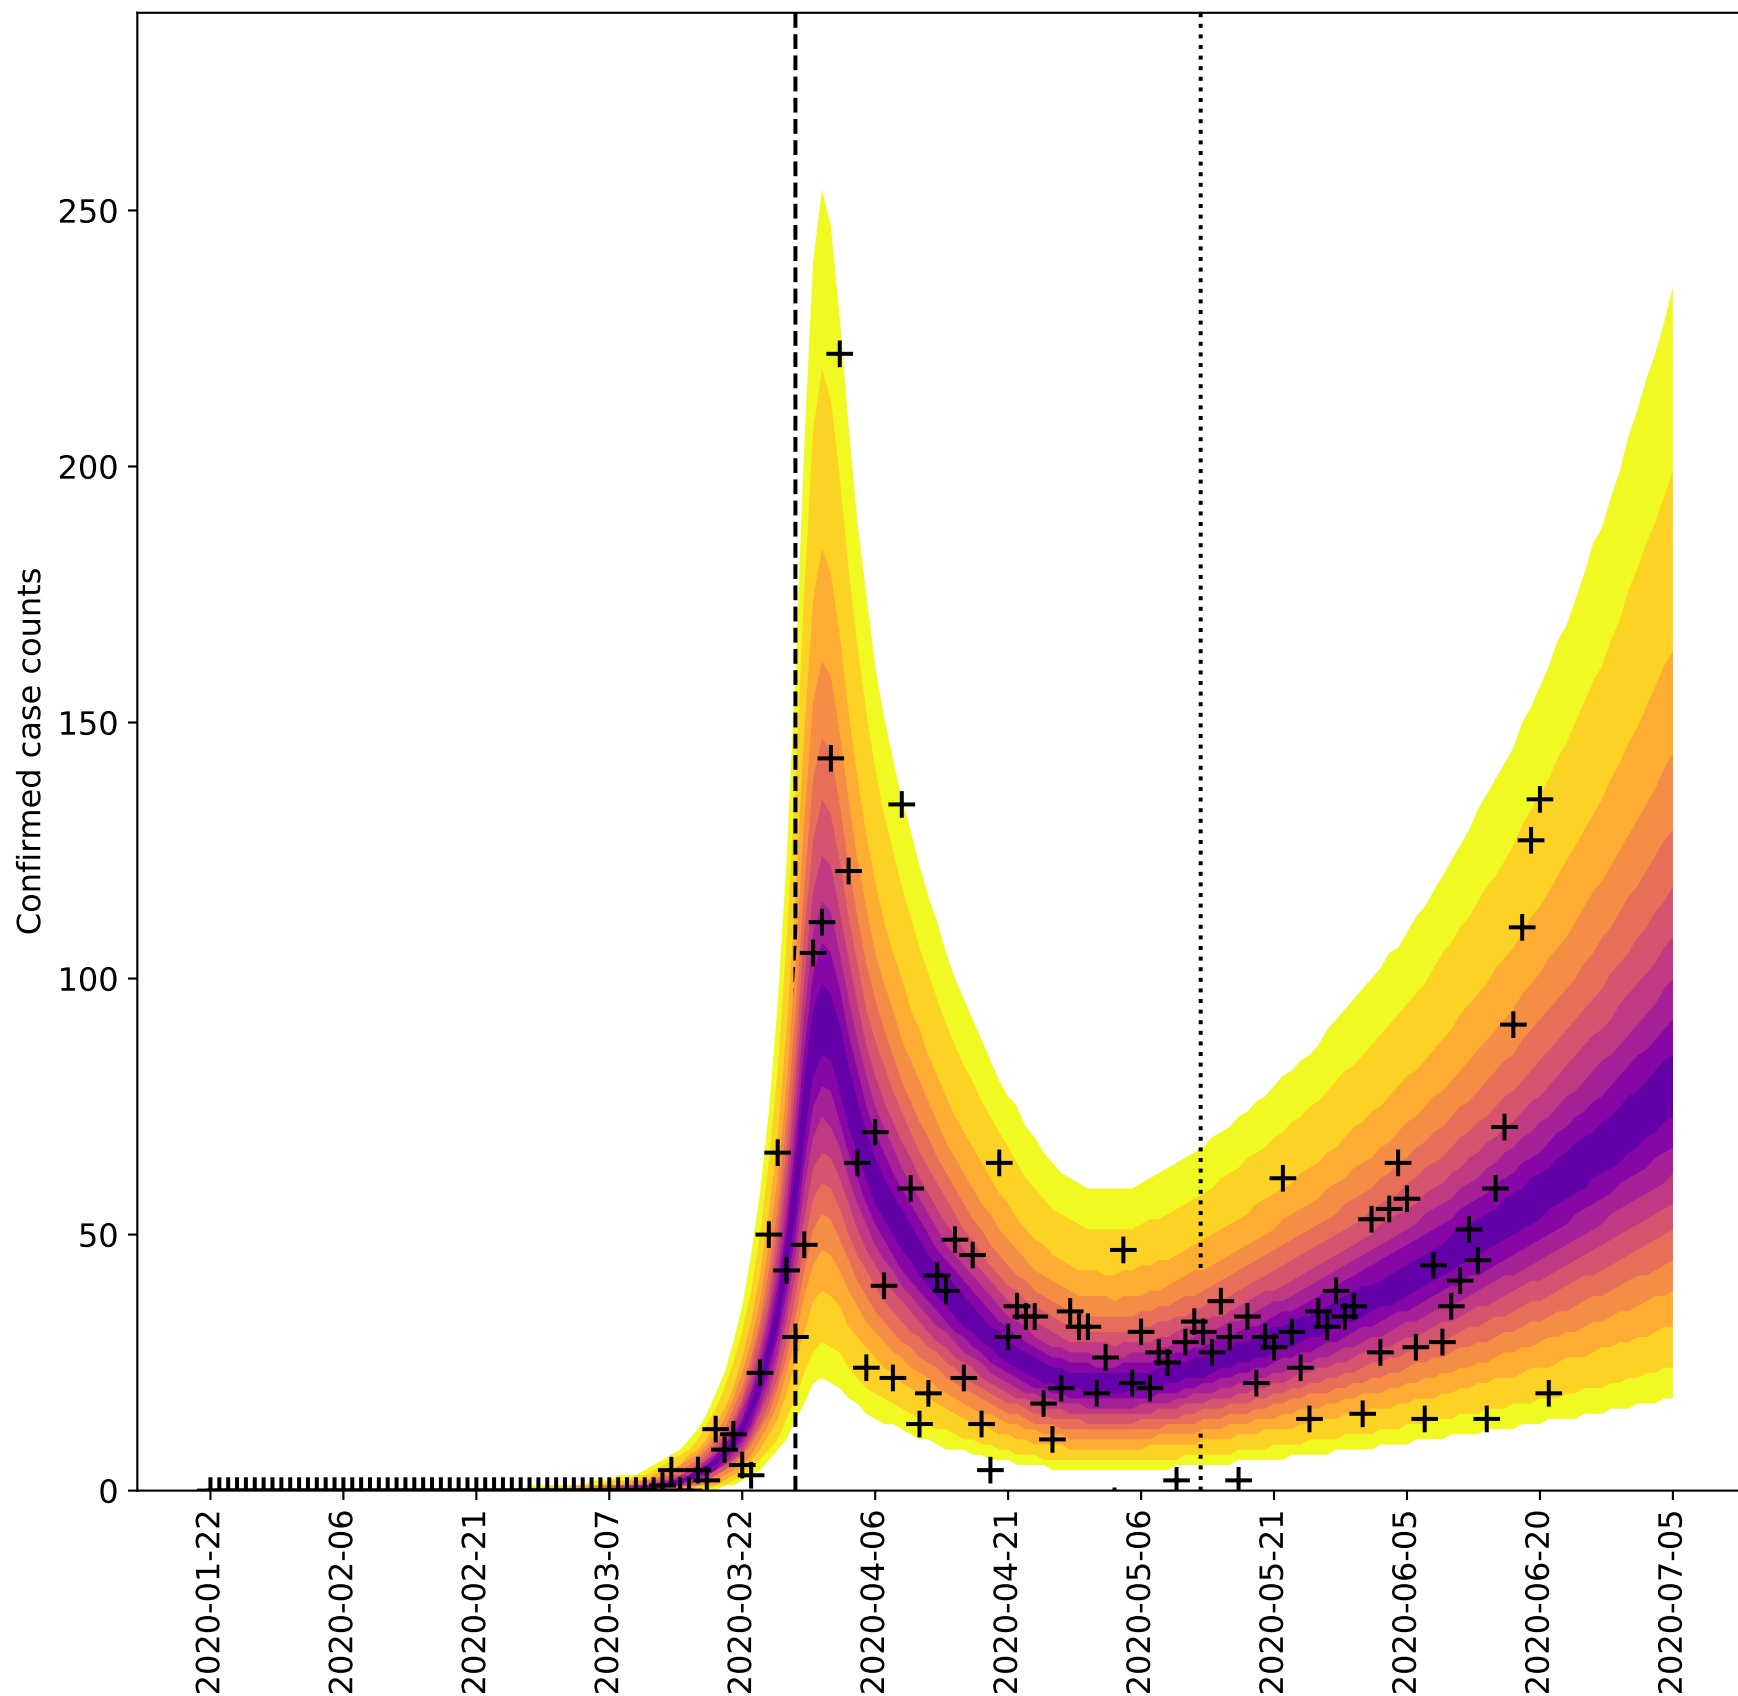

# Illinois

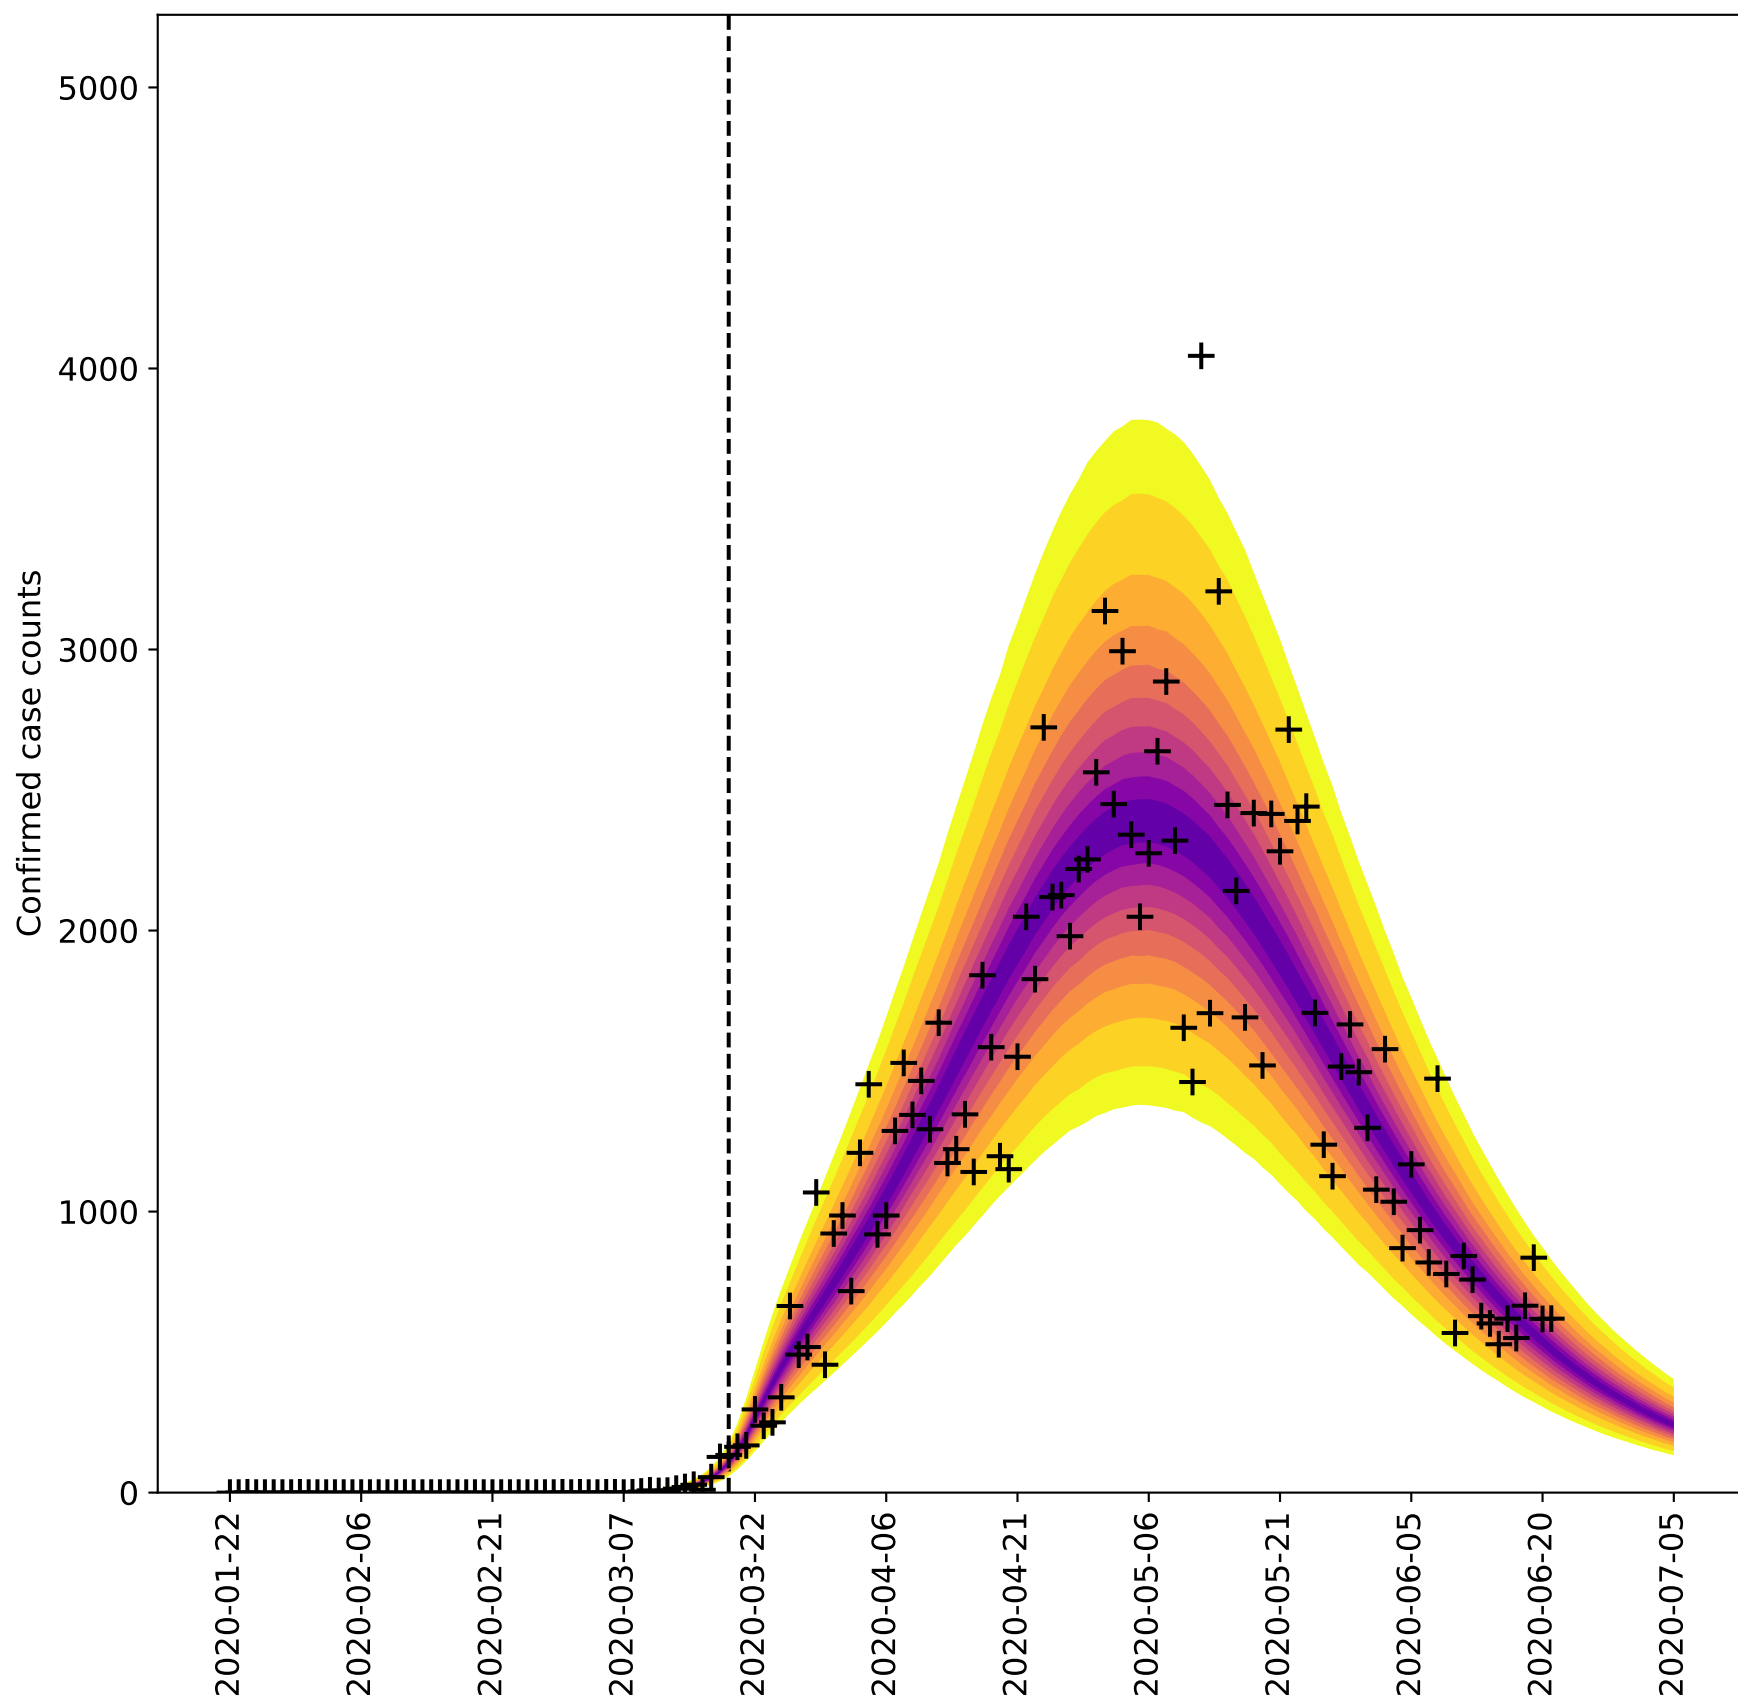

# Indiana

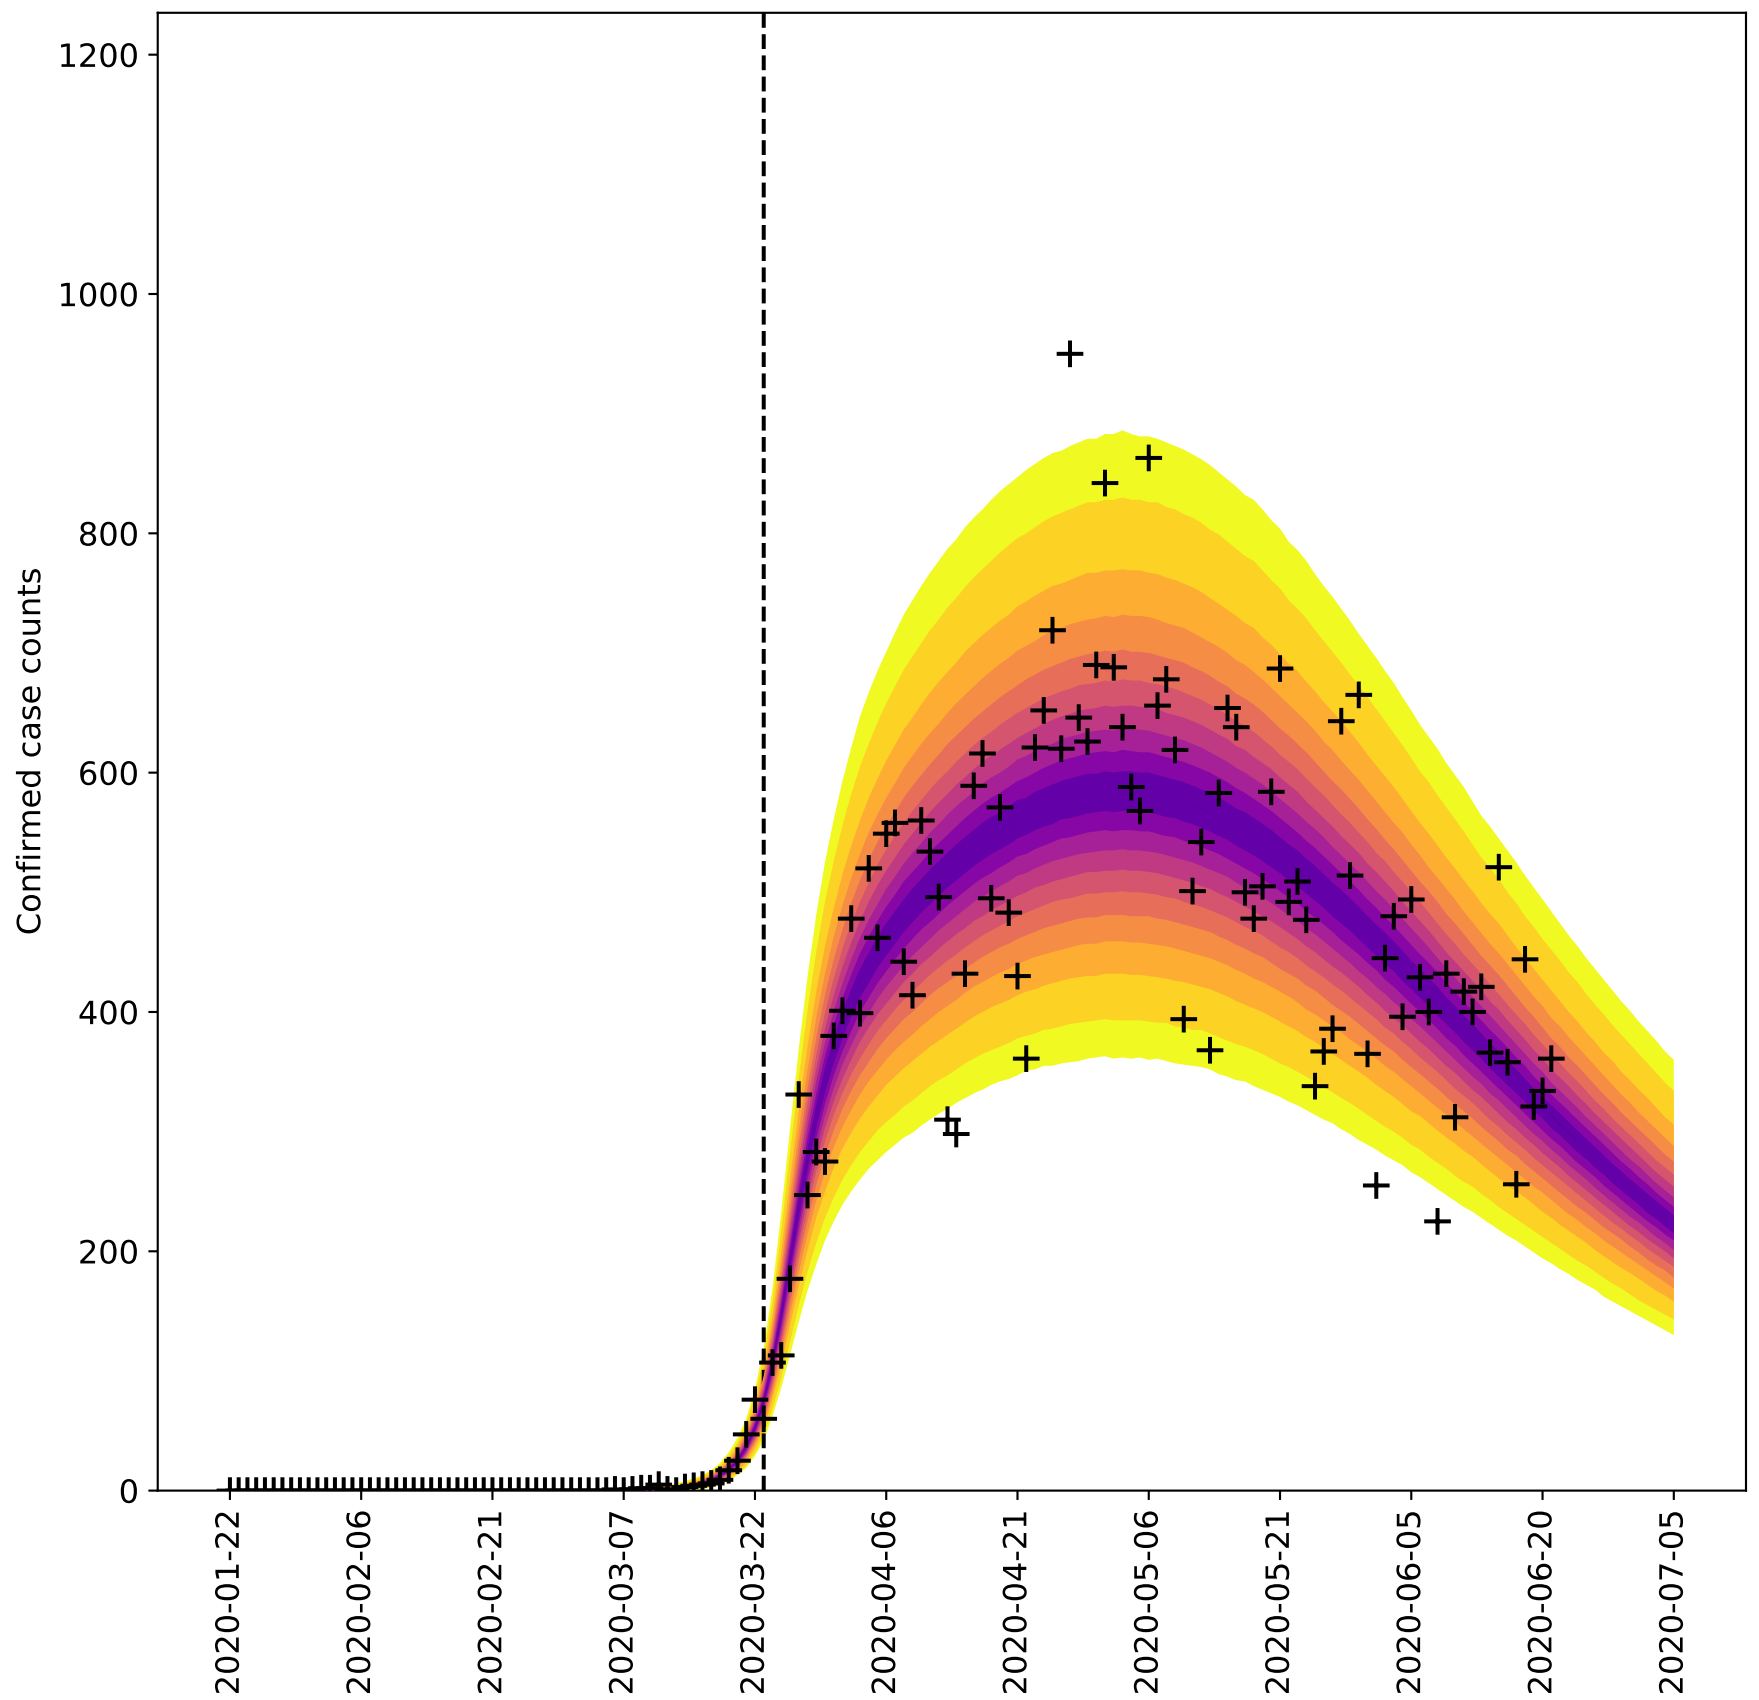

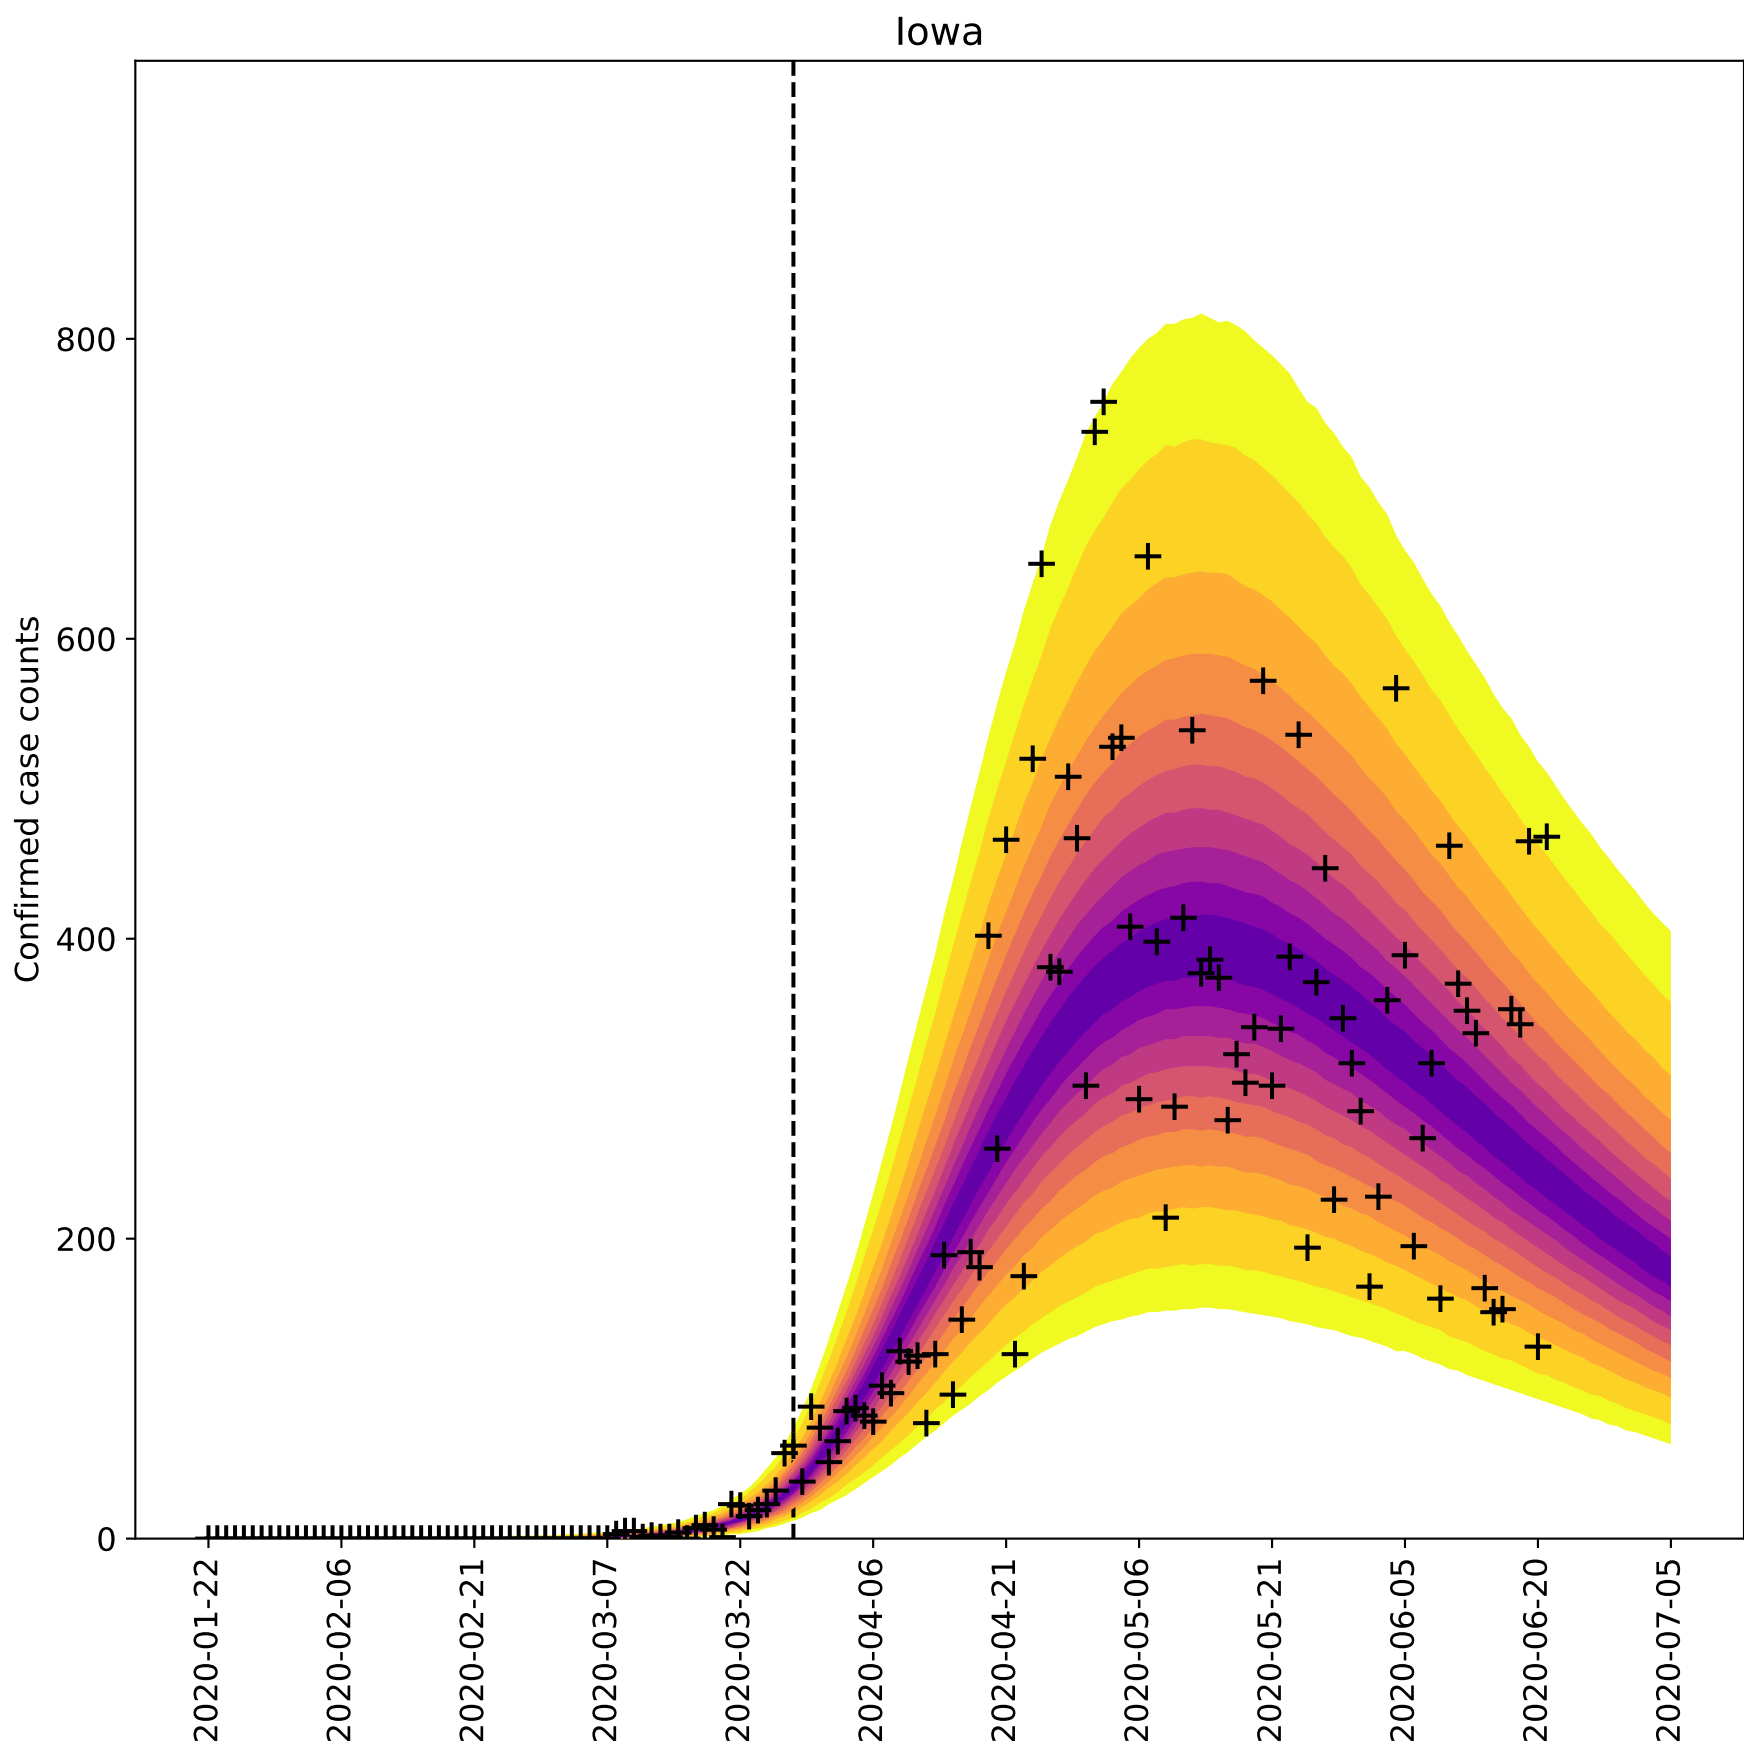

# Kansas

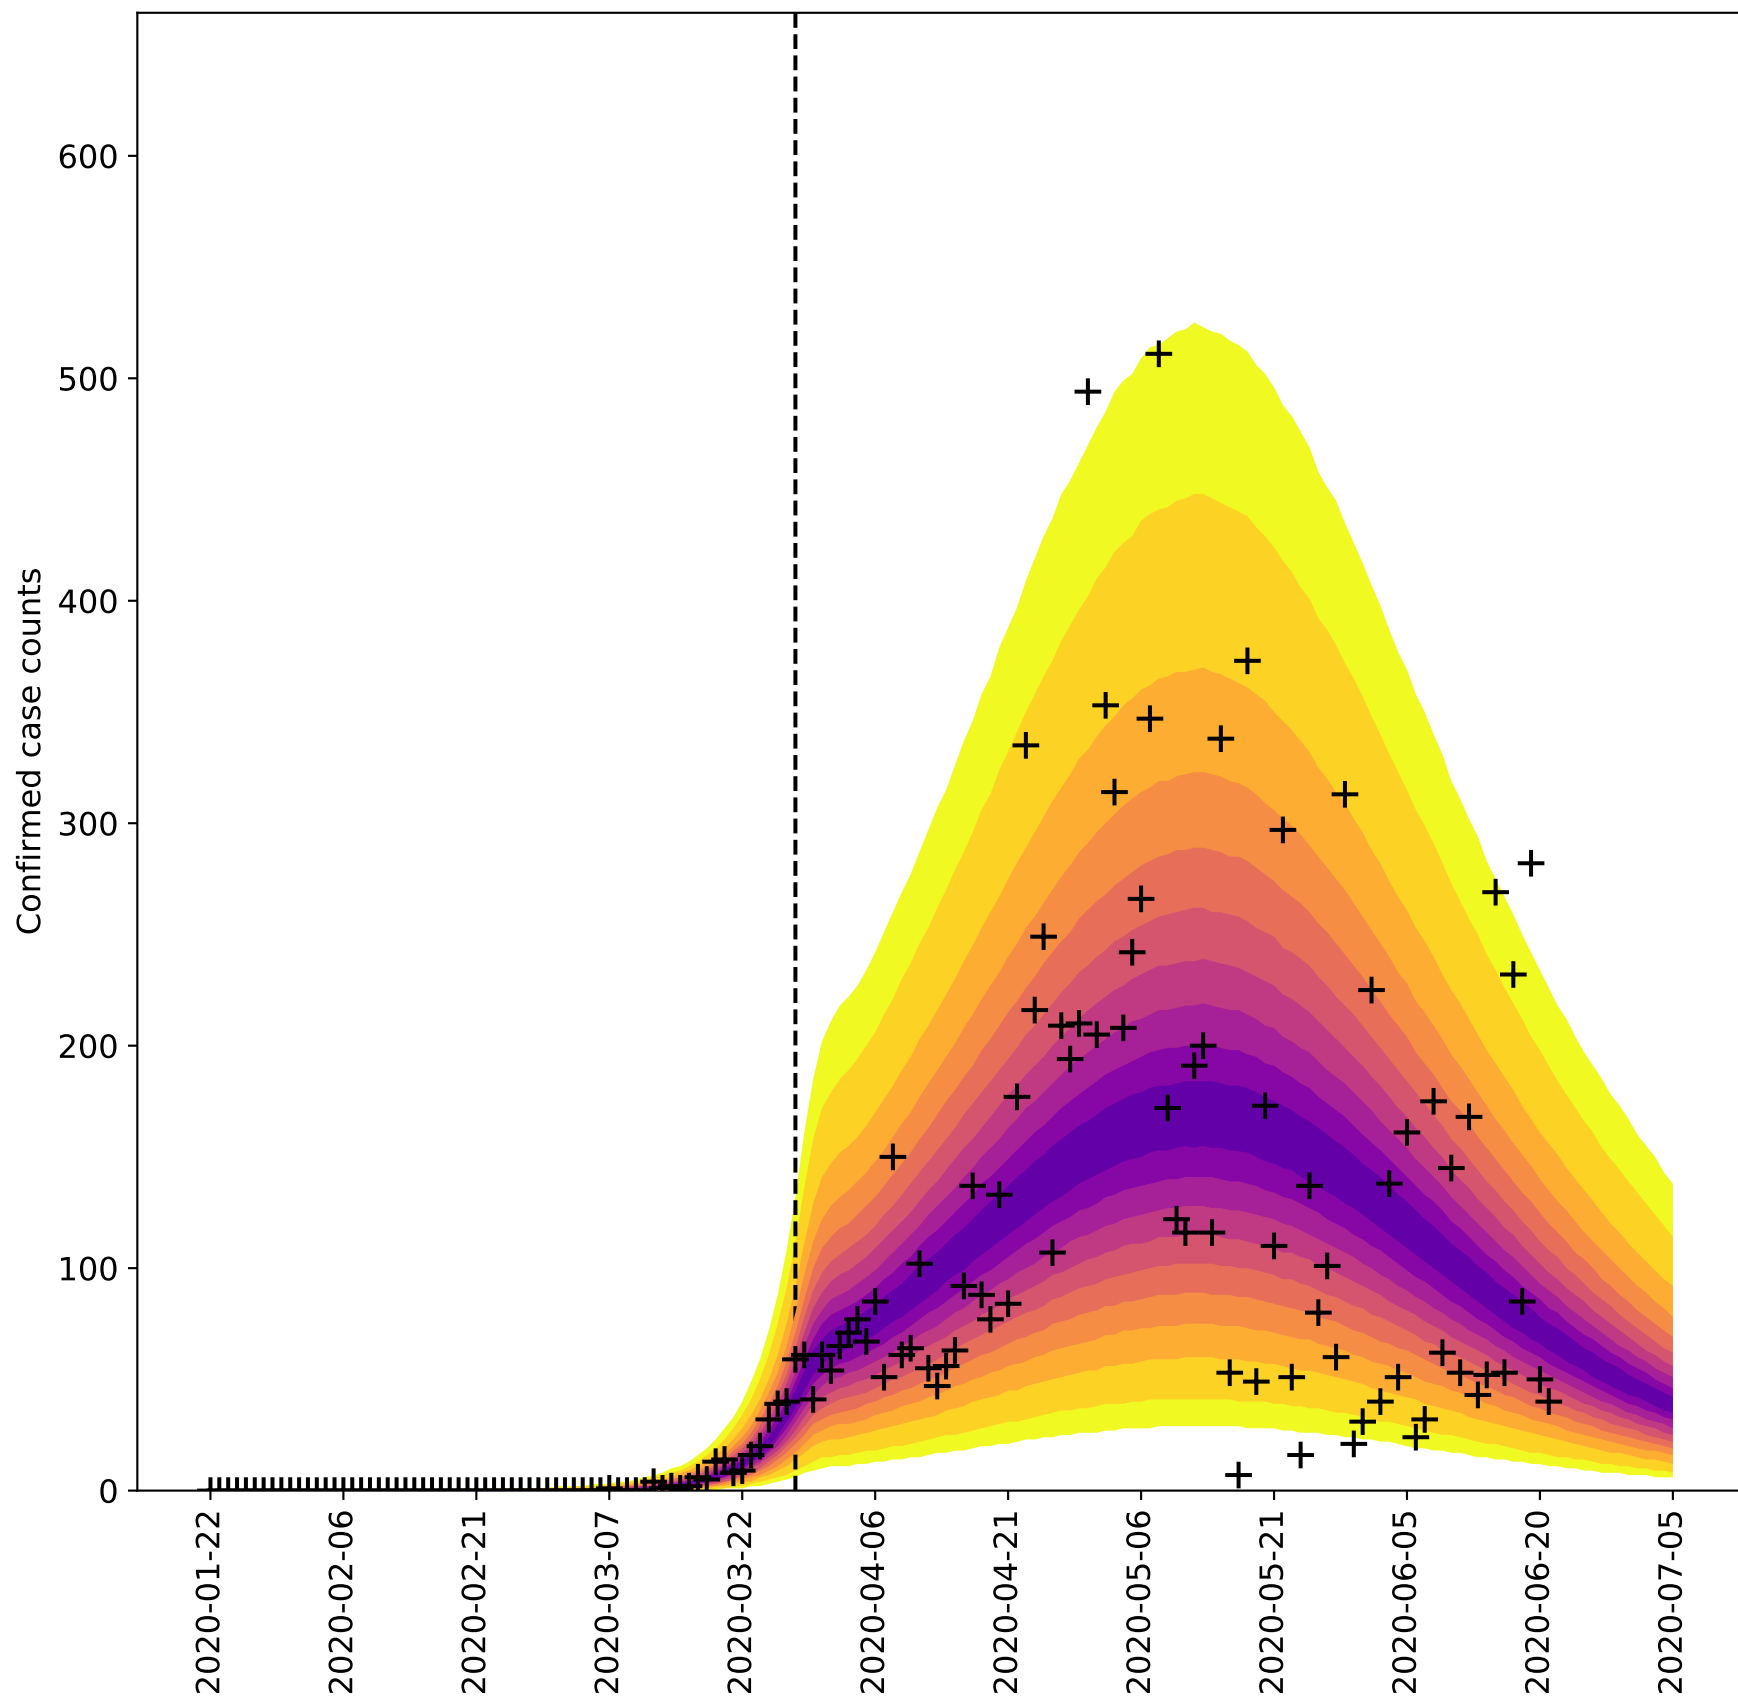

# Kentucky

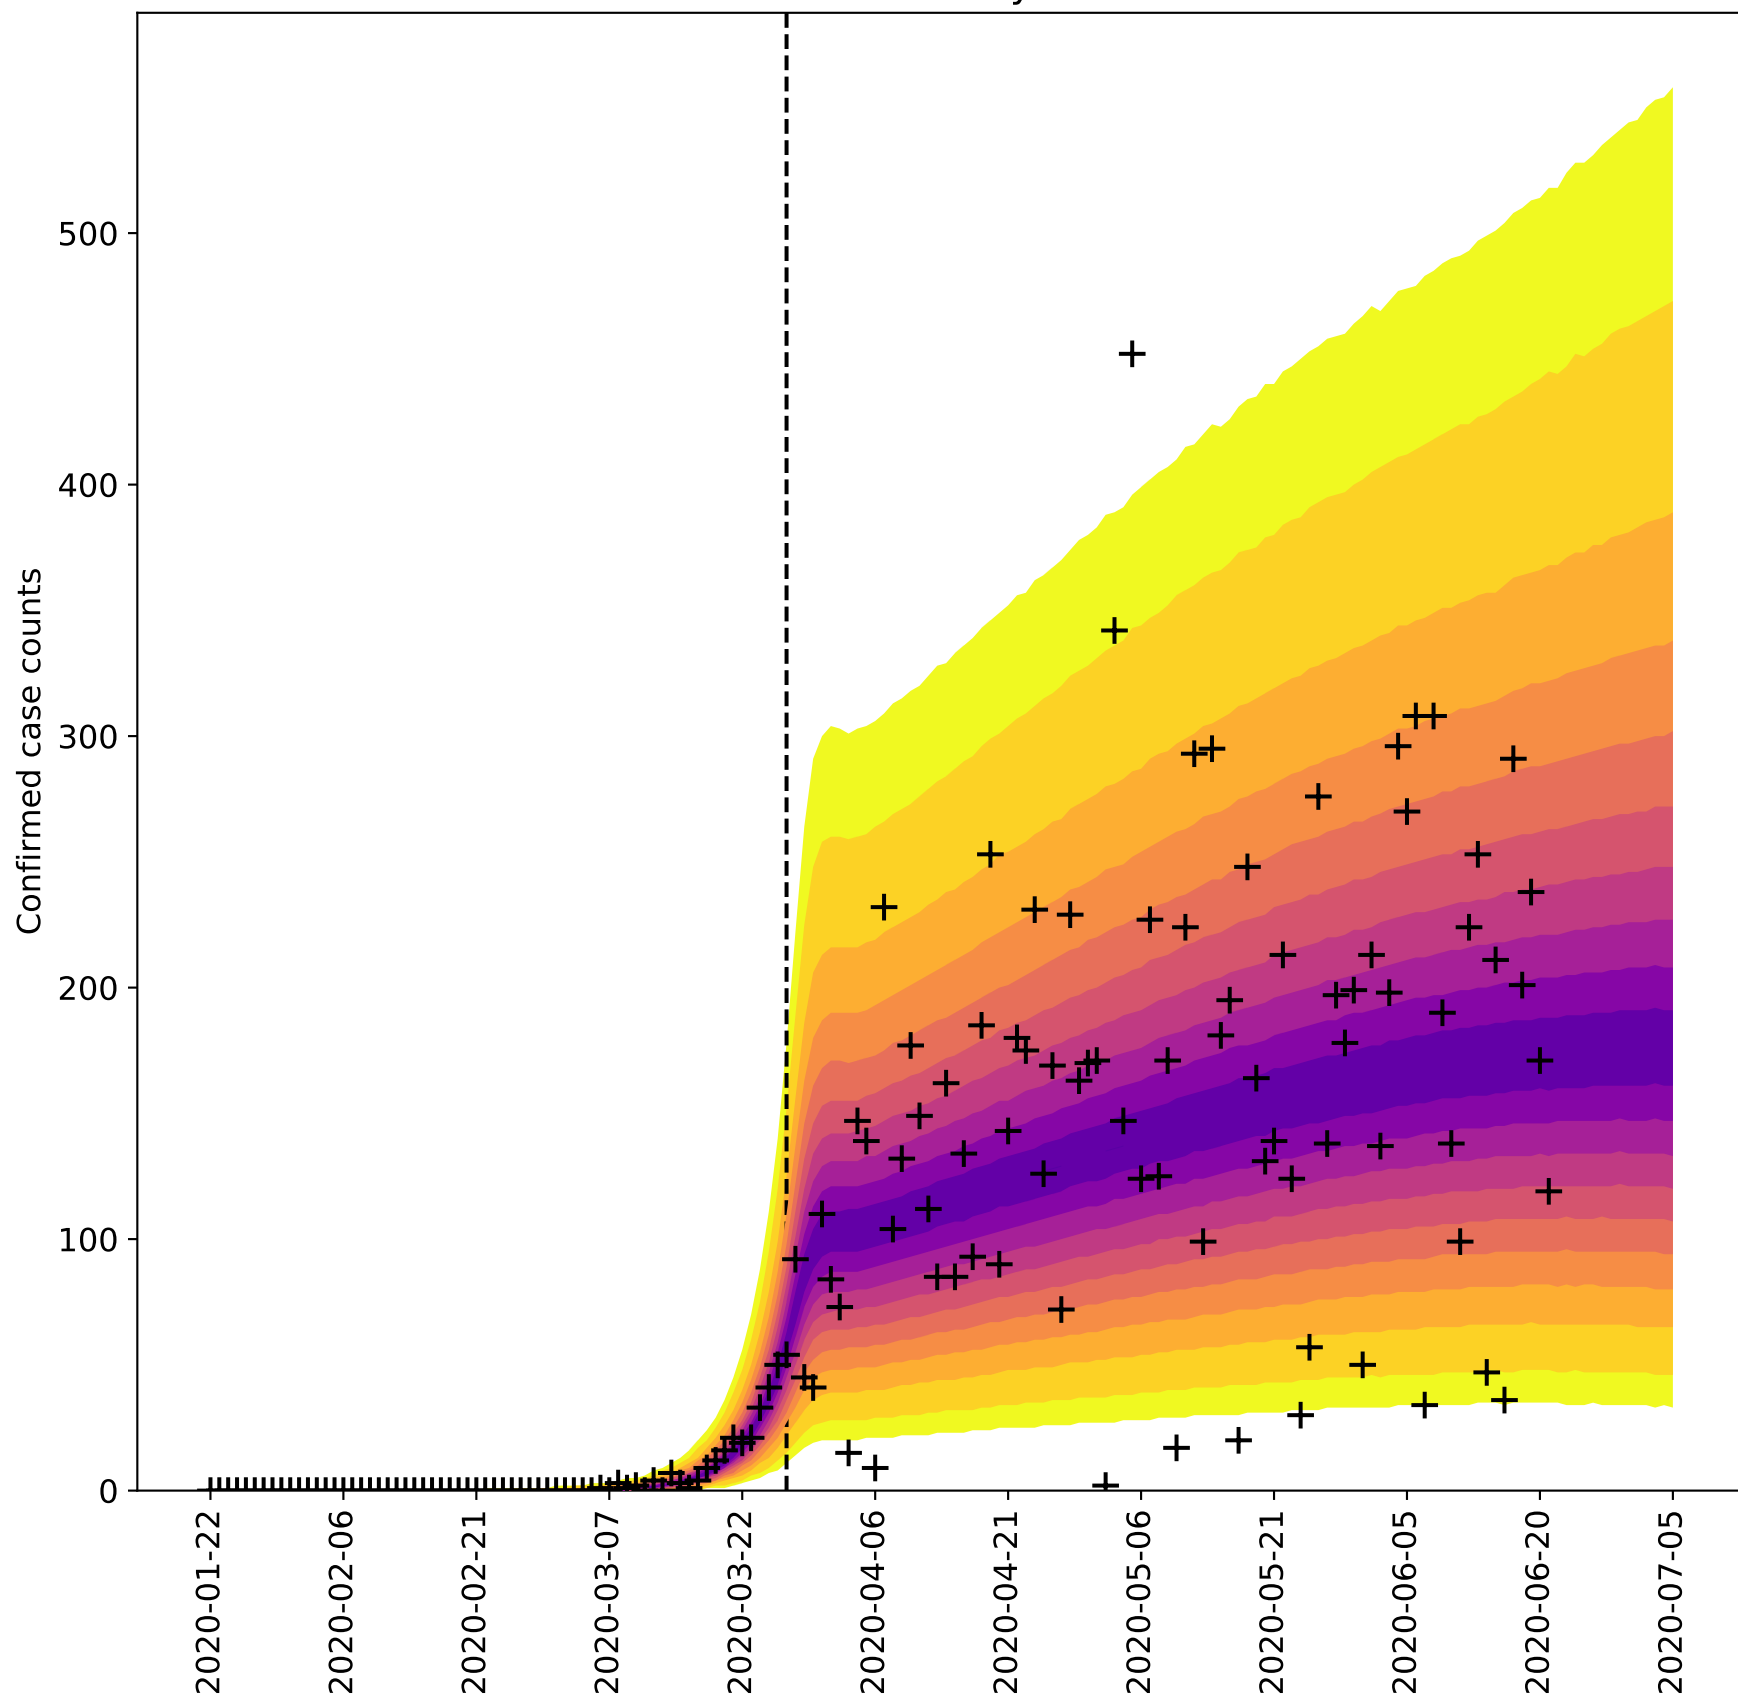



# Louisiana

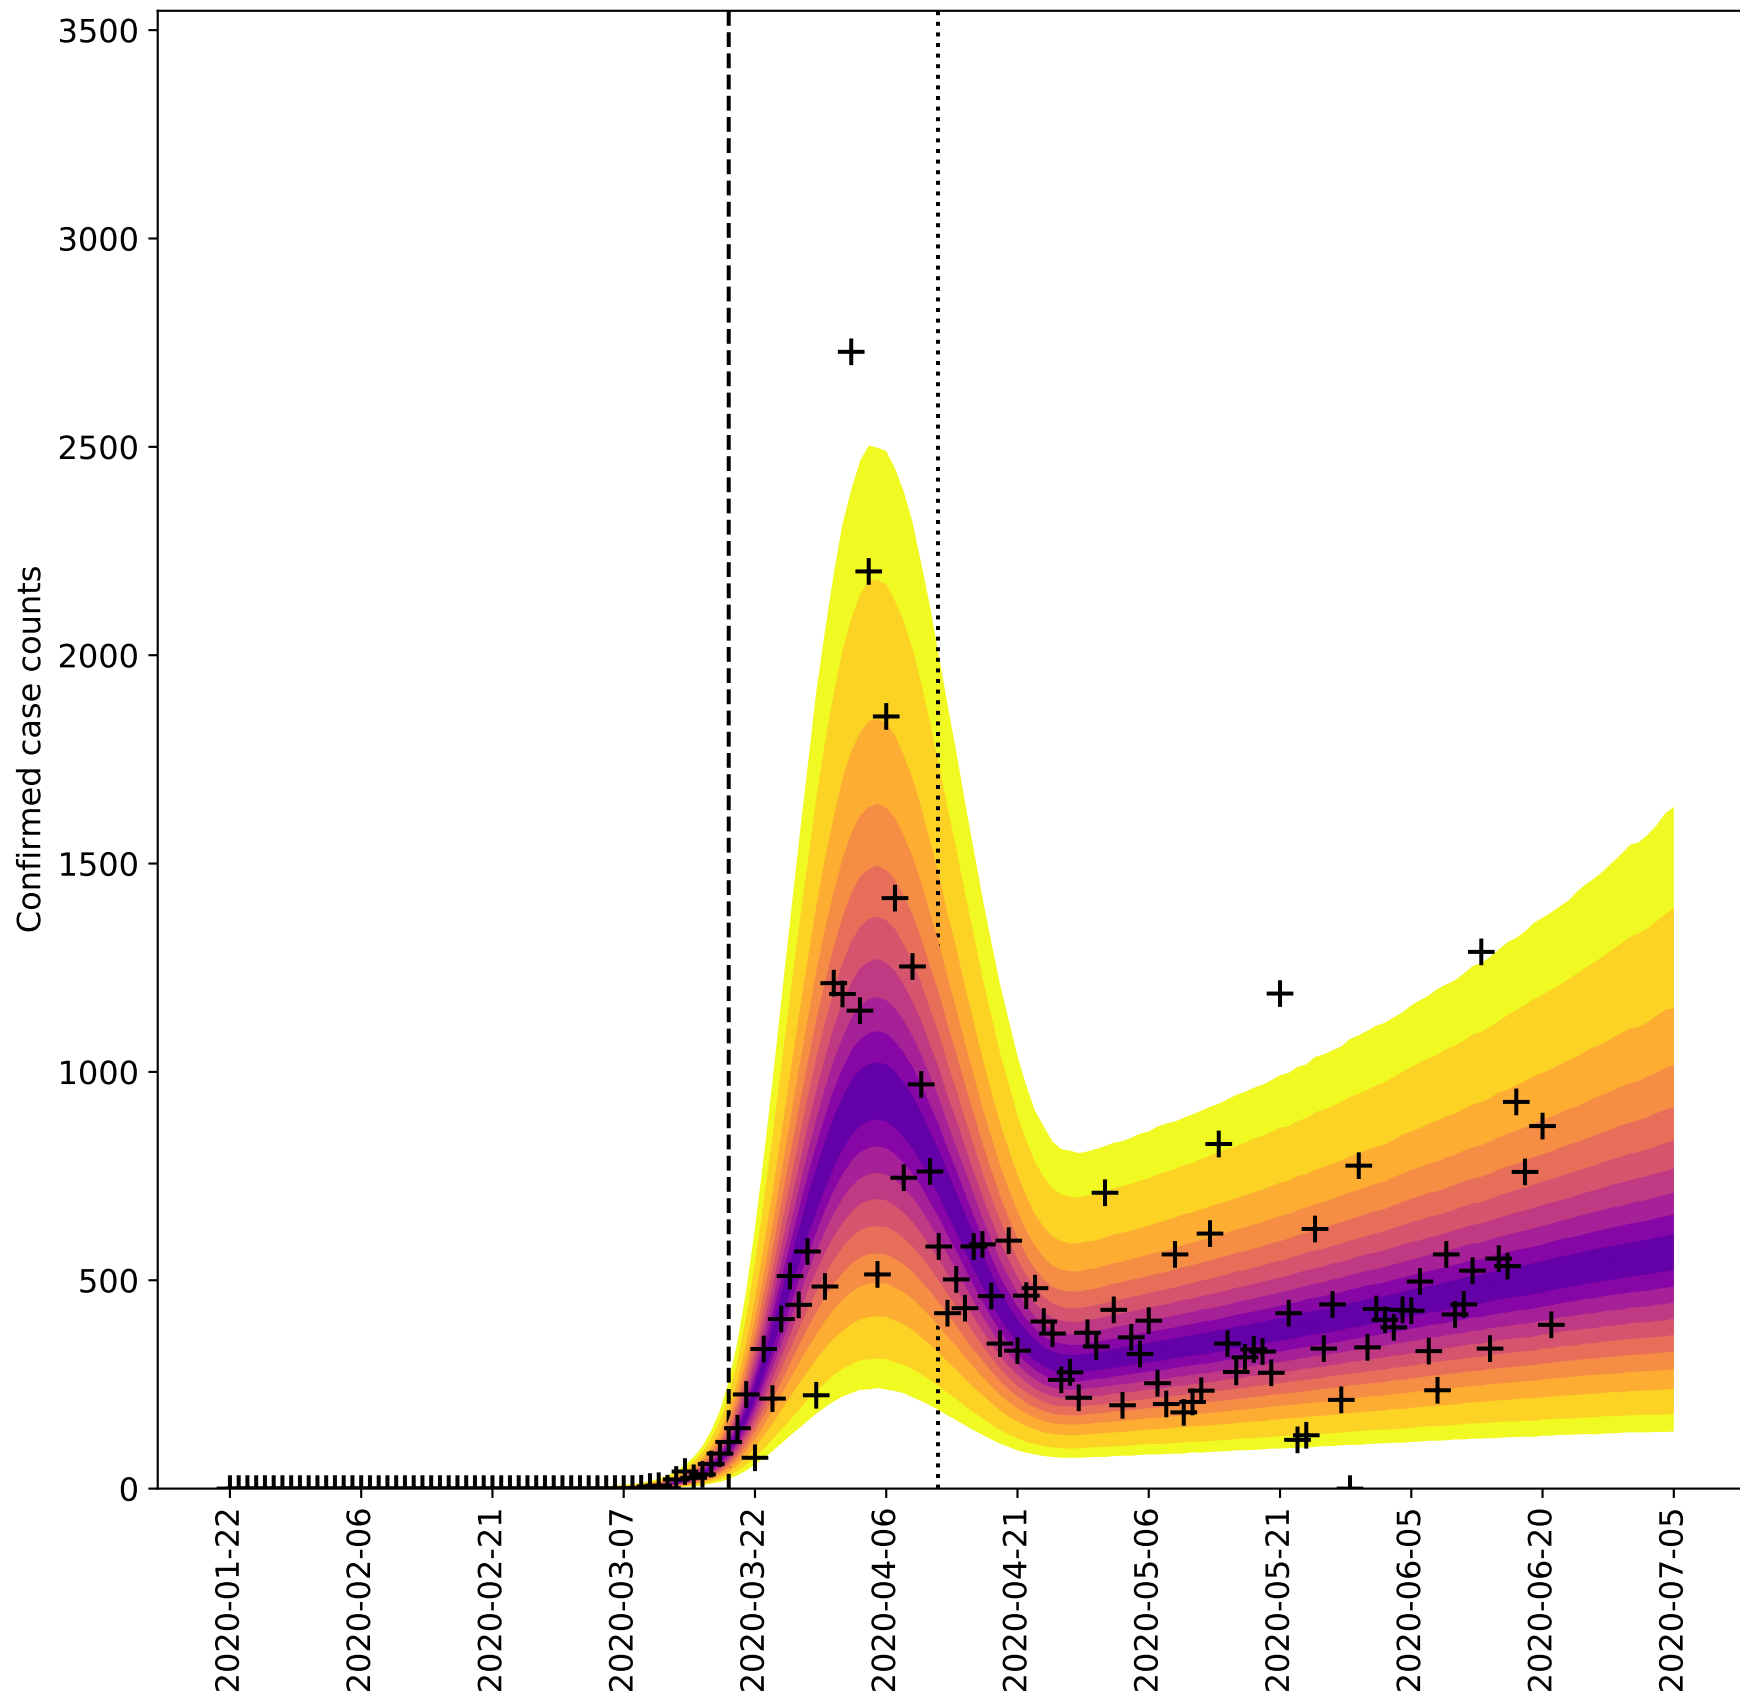

# Maine

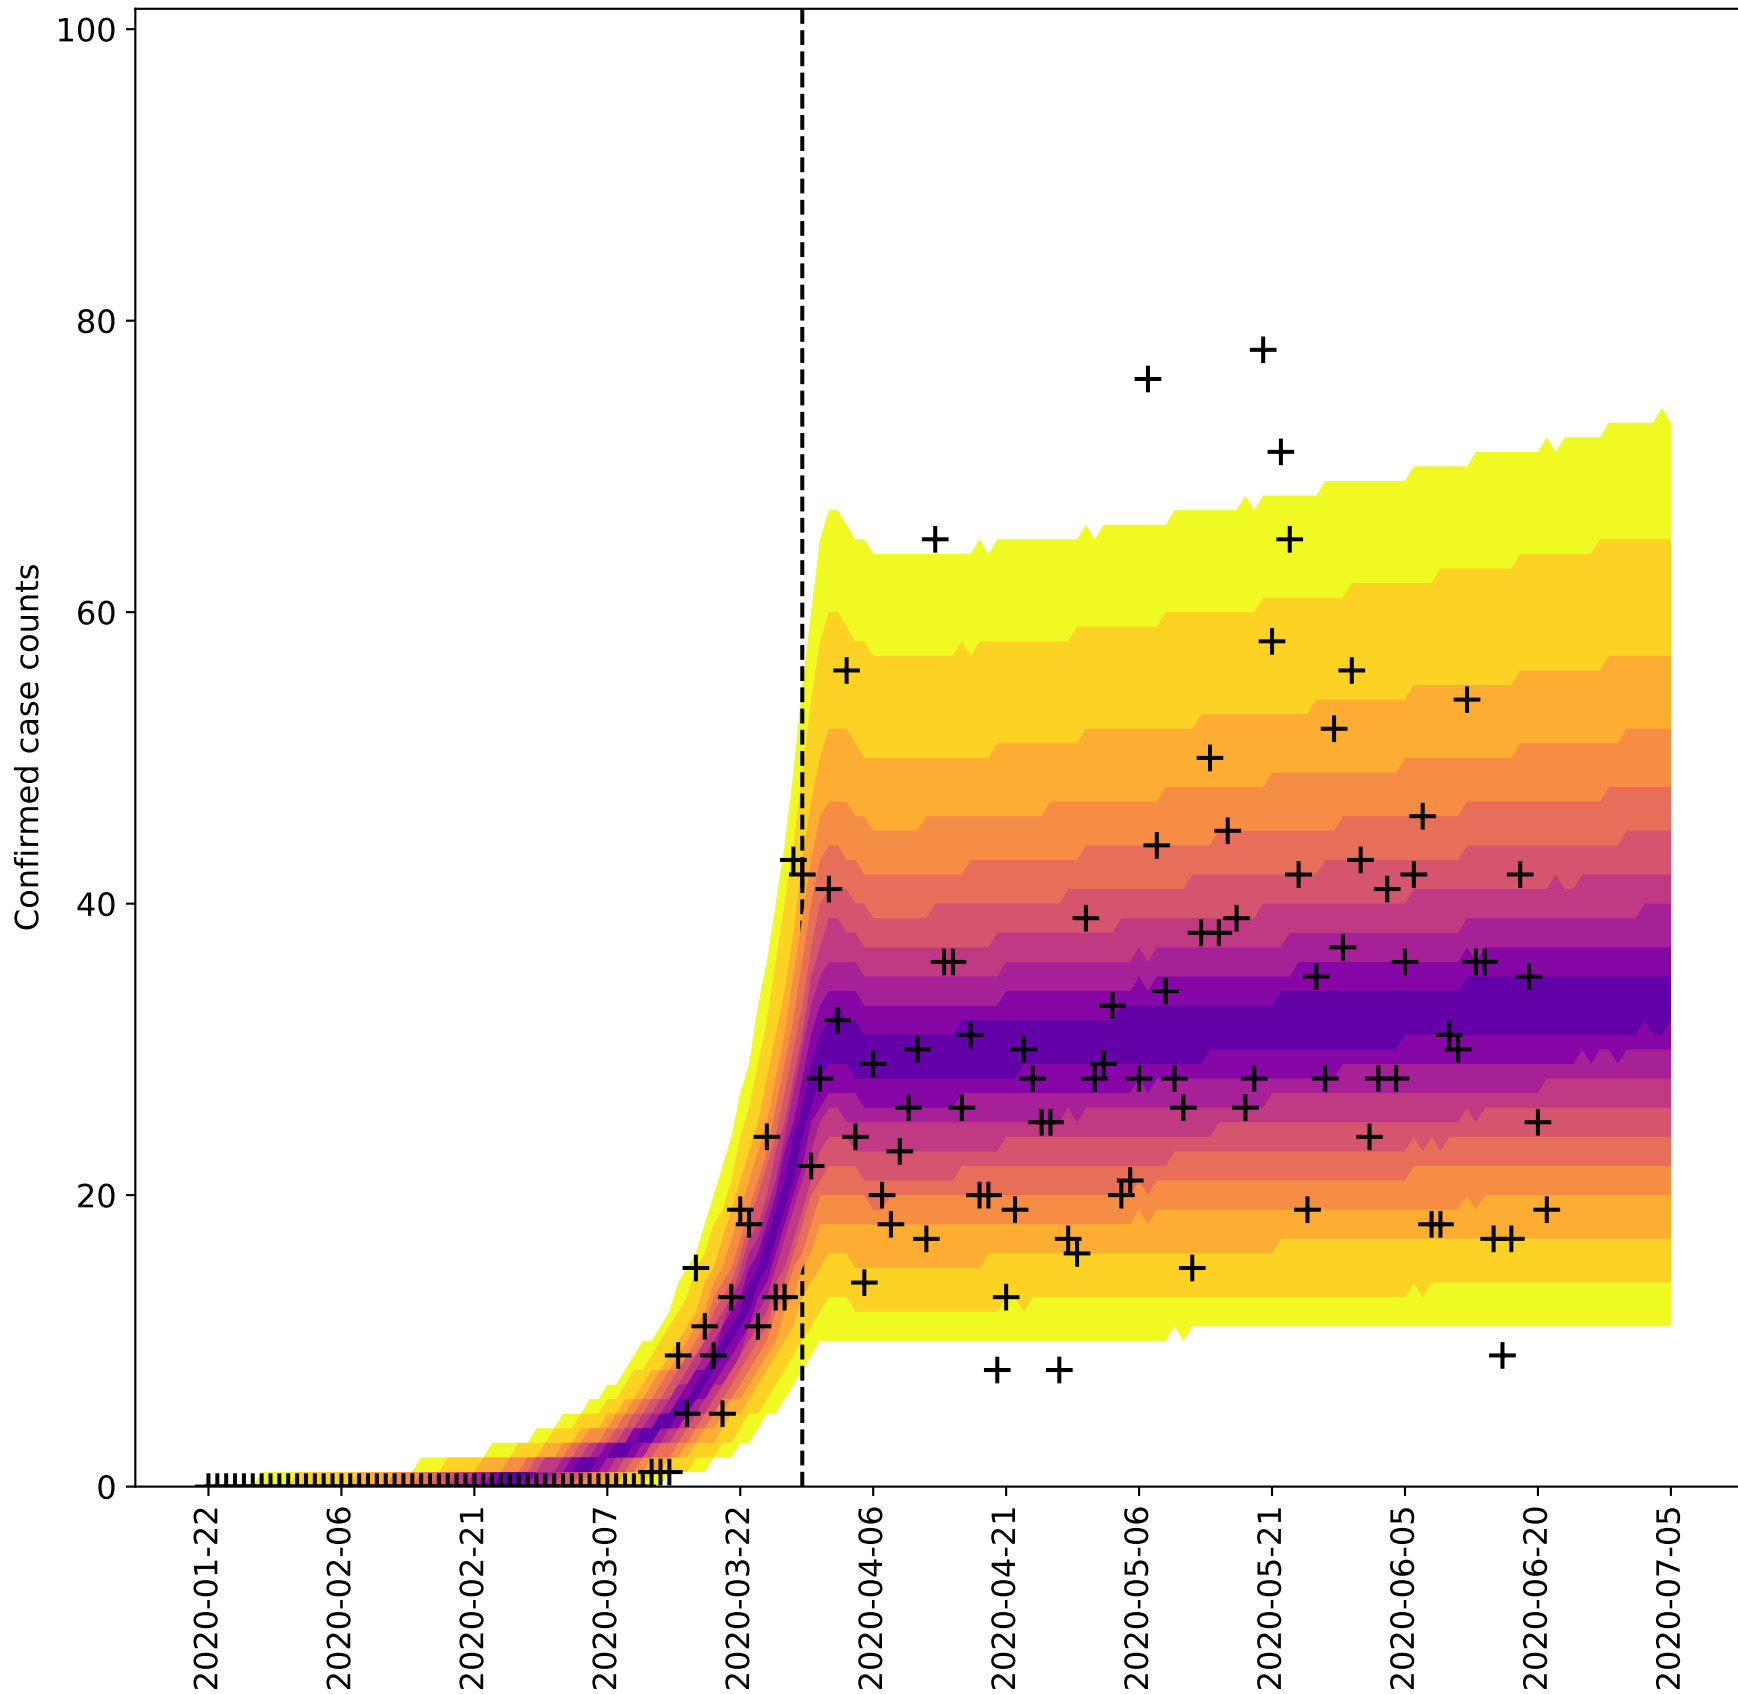

# Maryland

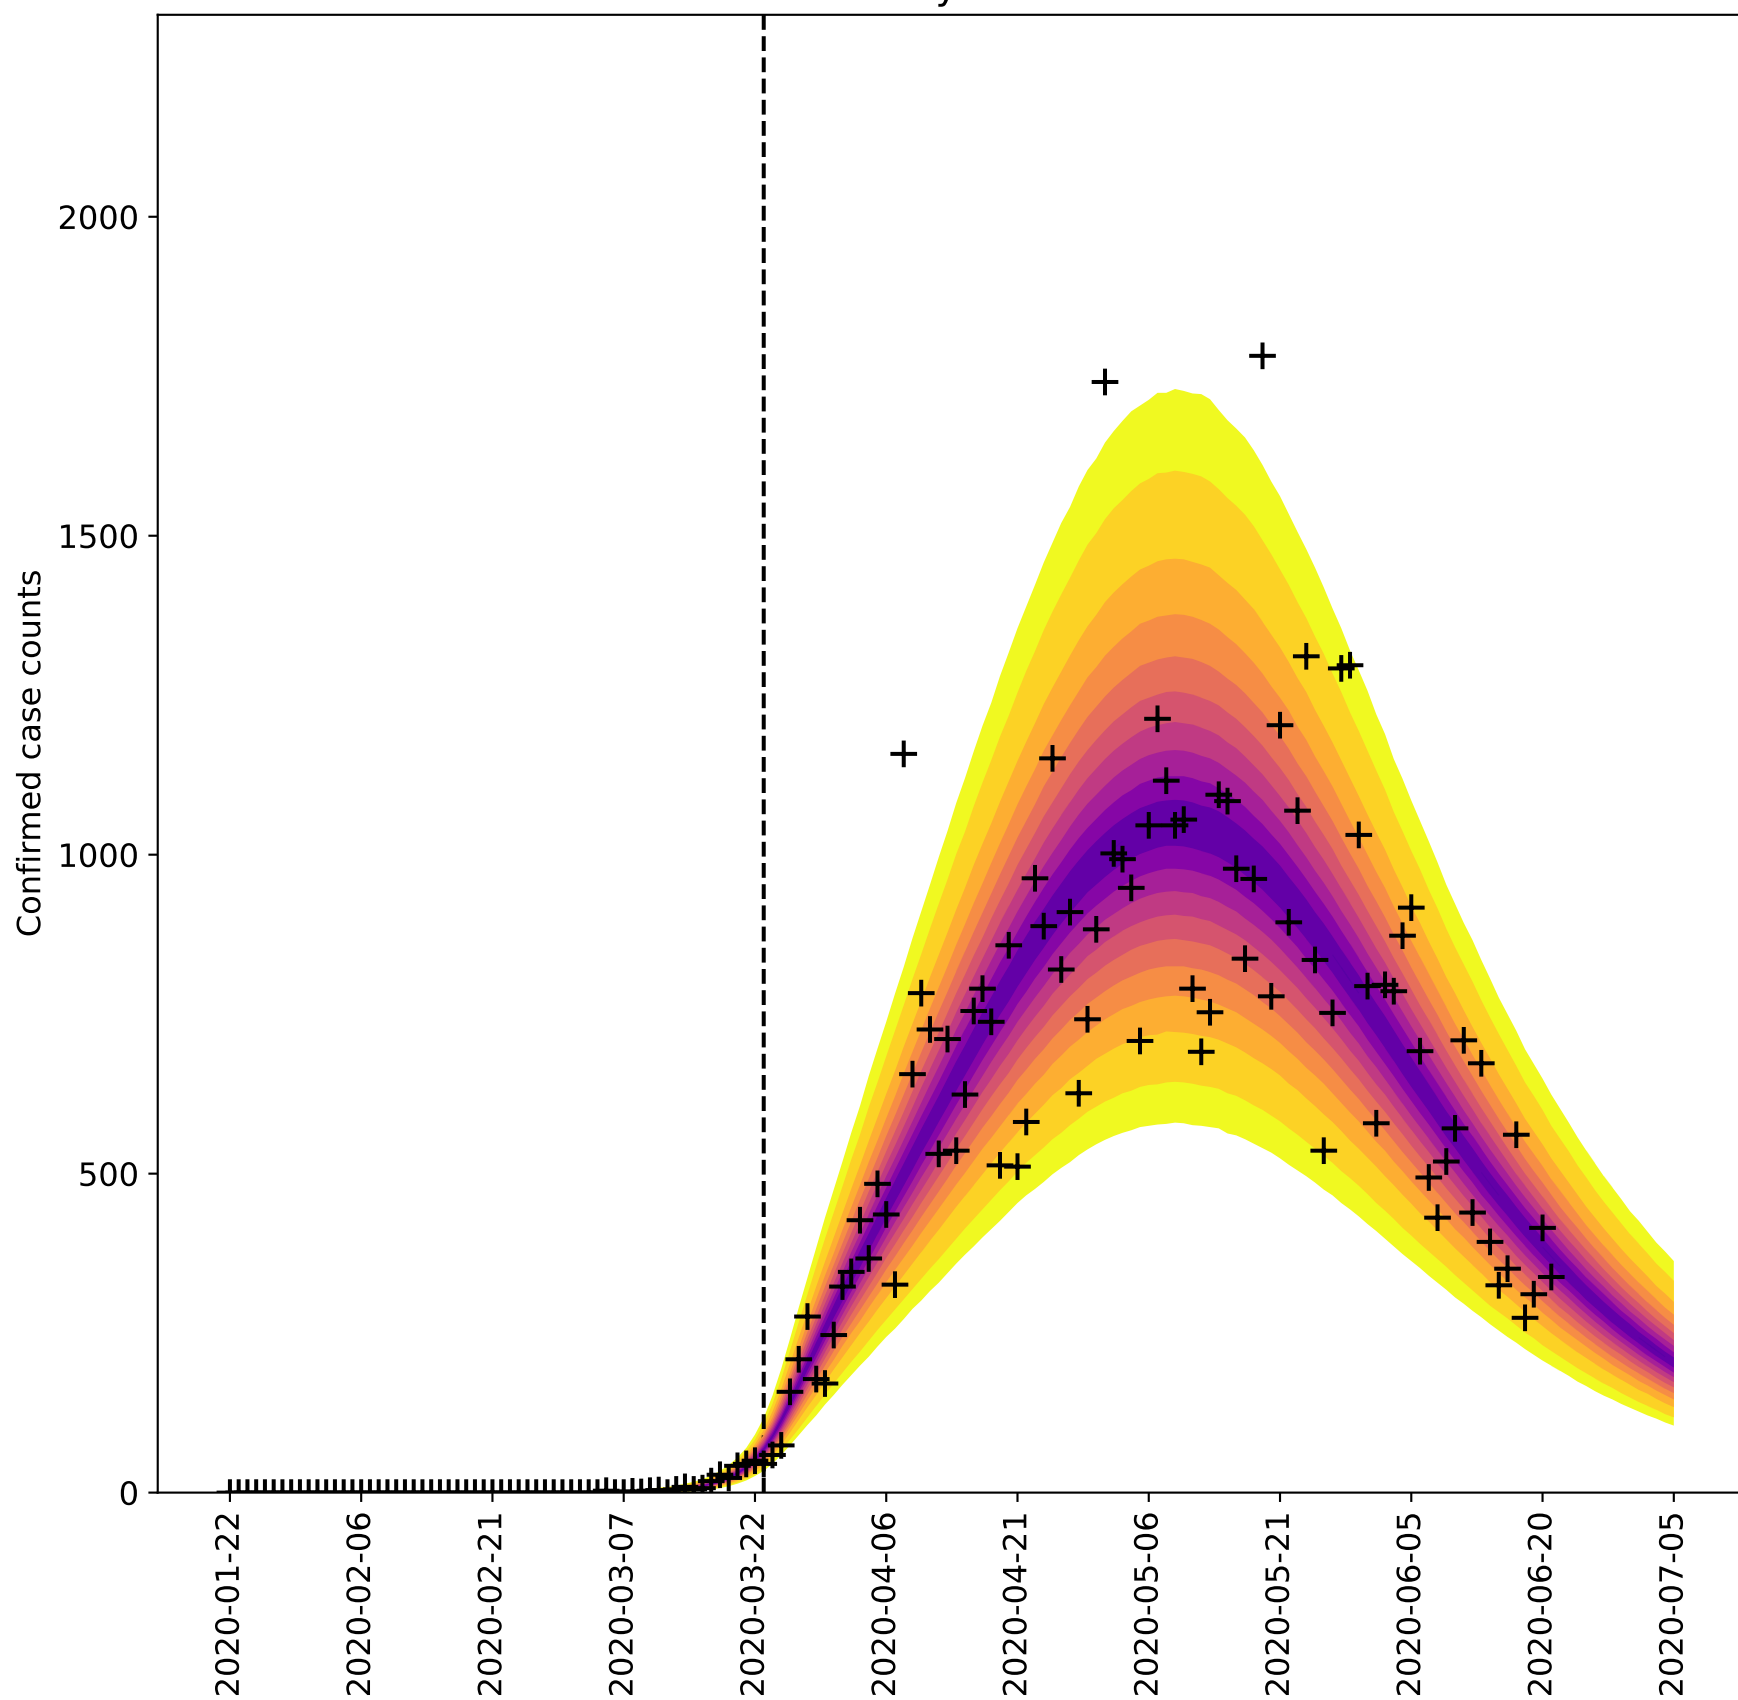

# Massachusetts

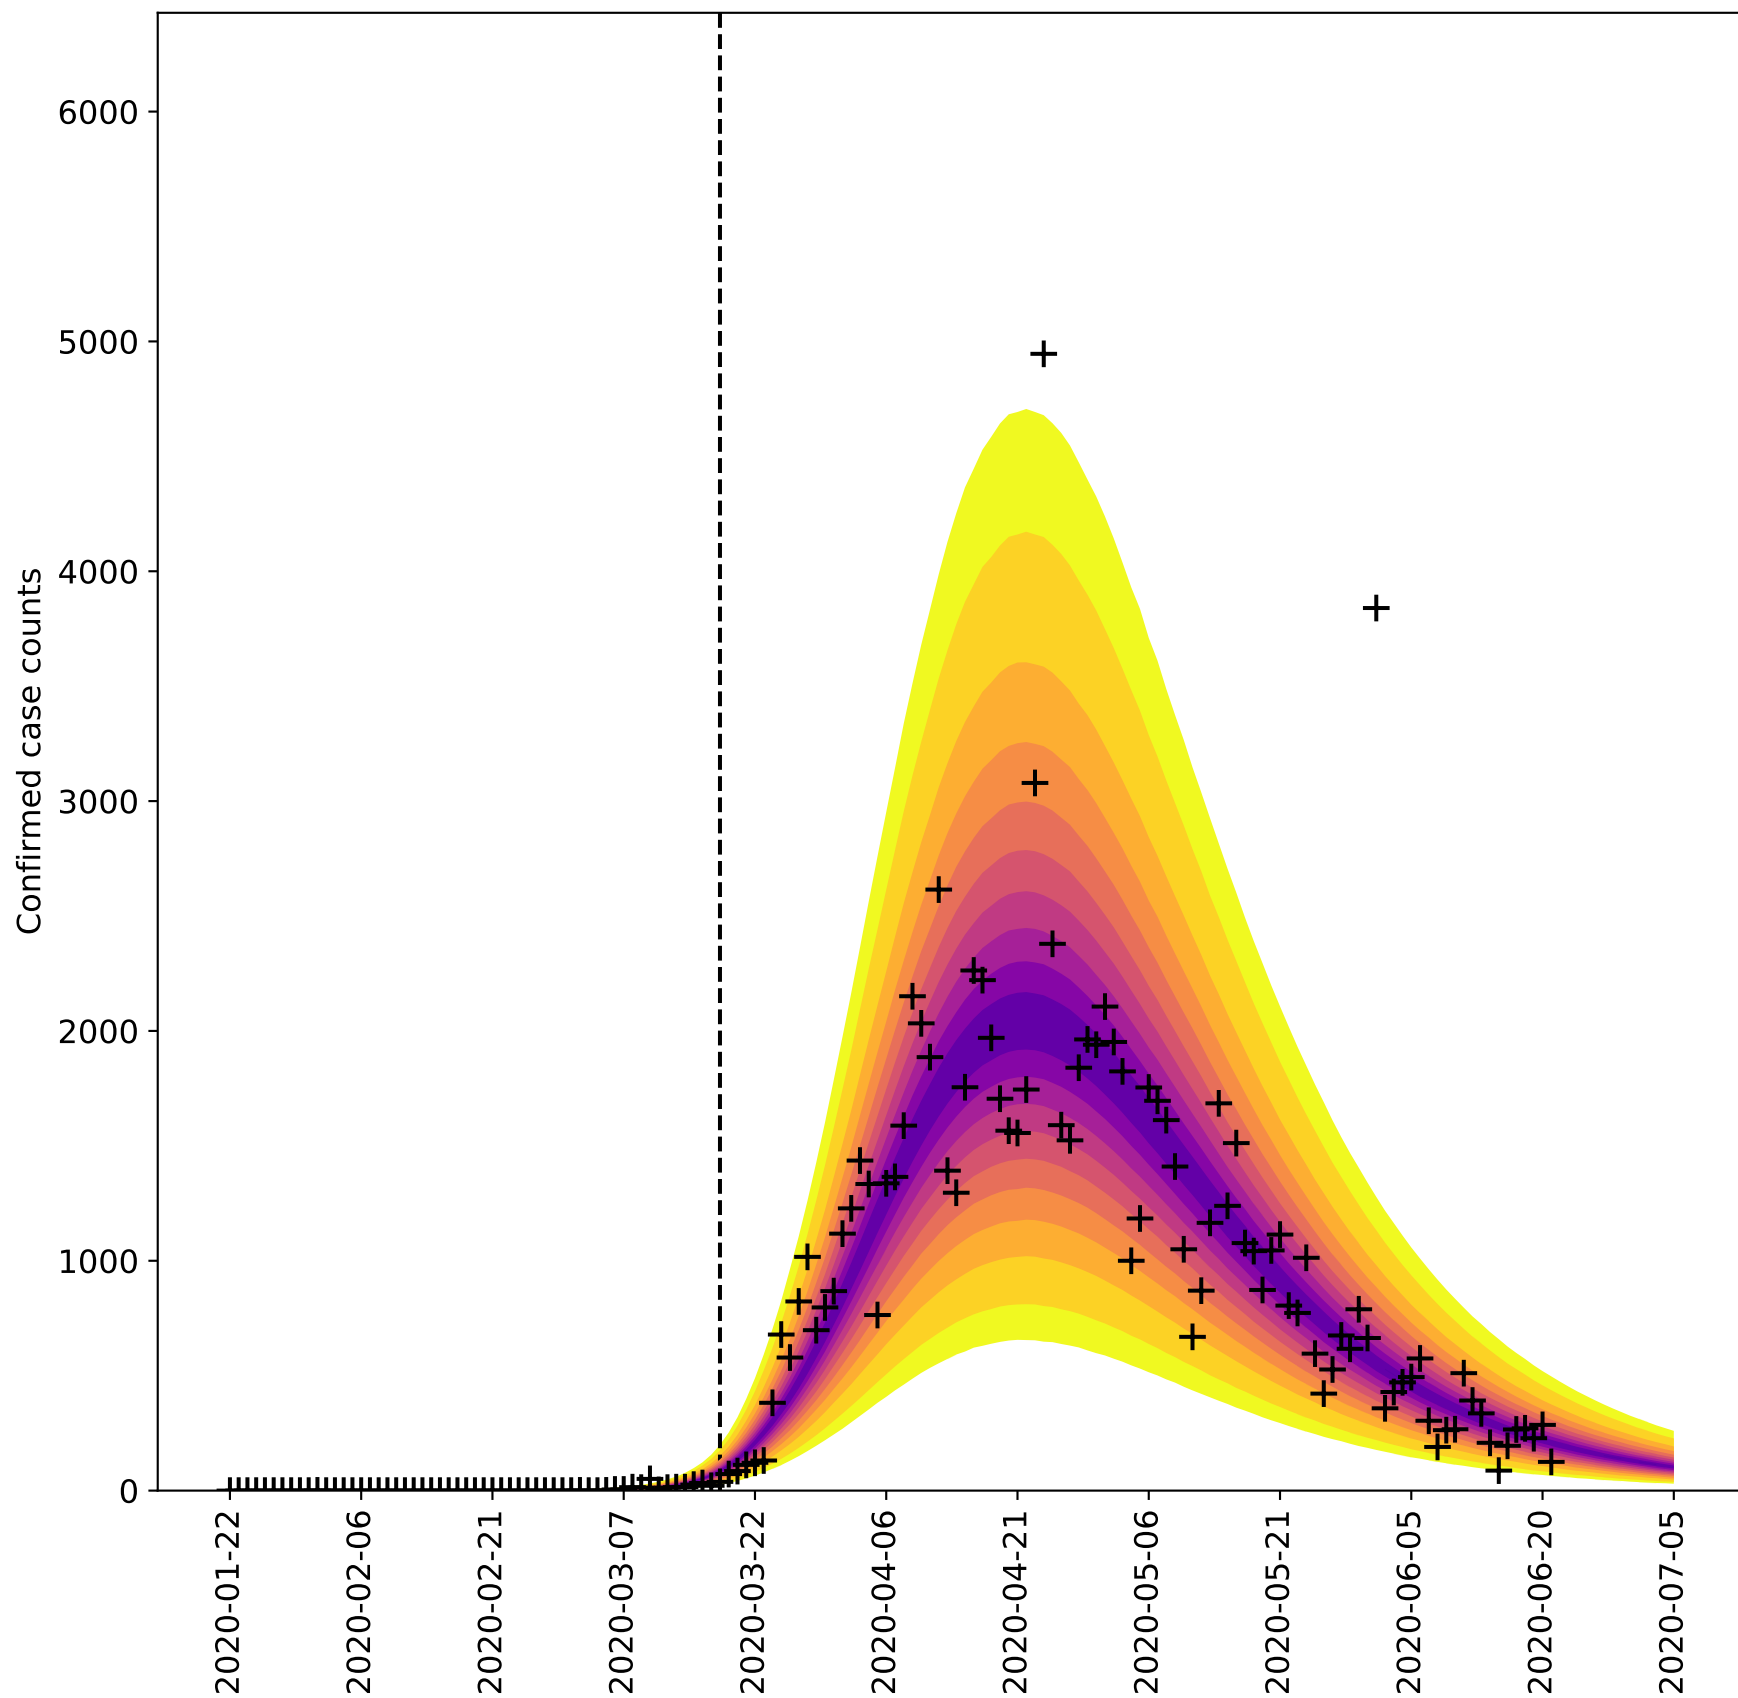

# Michigan

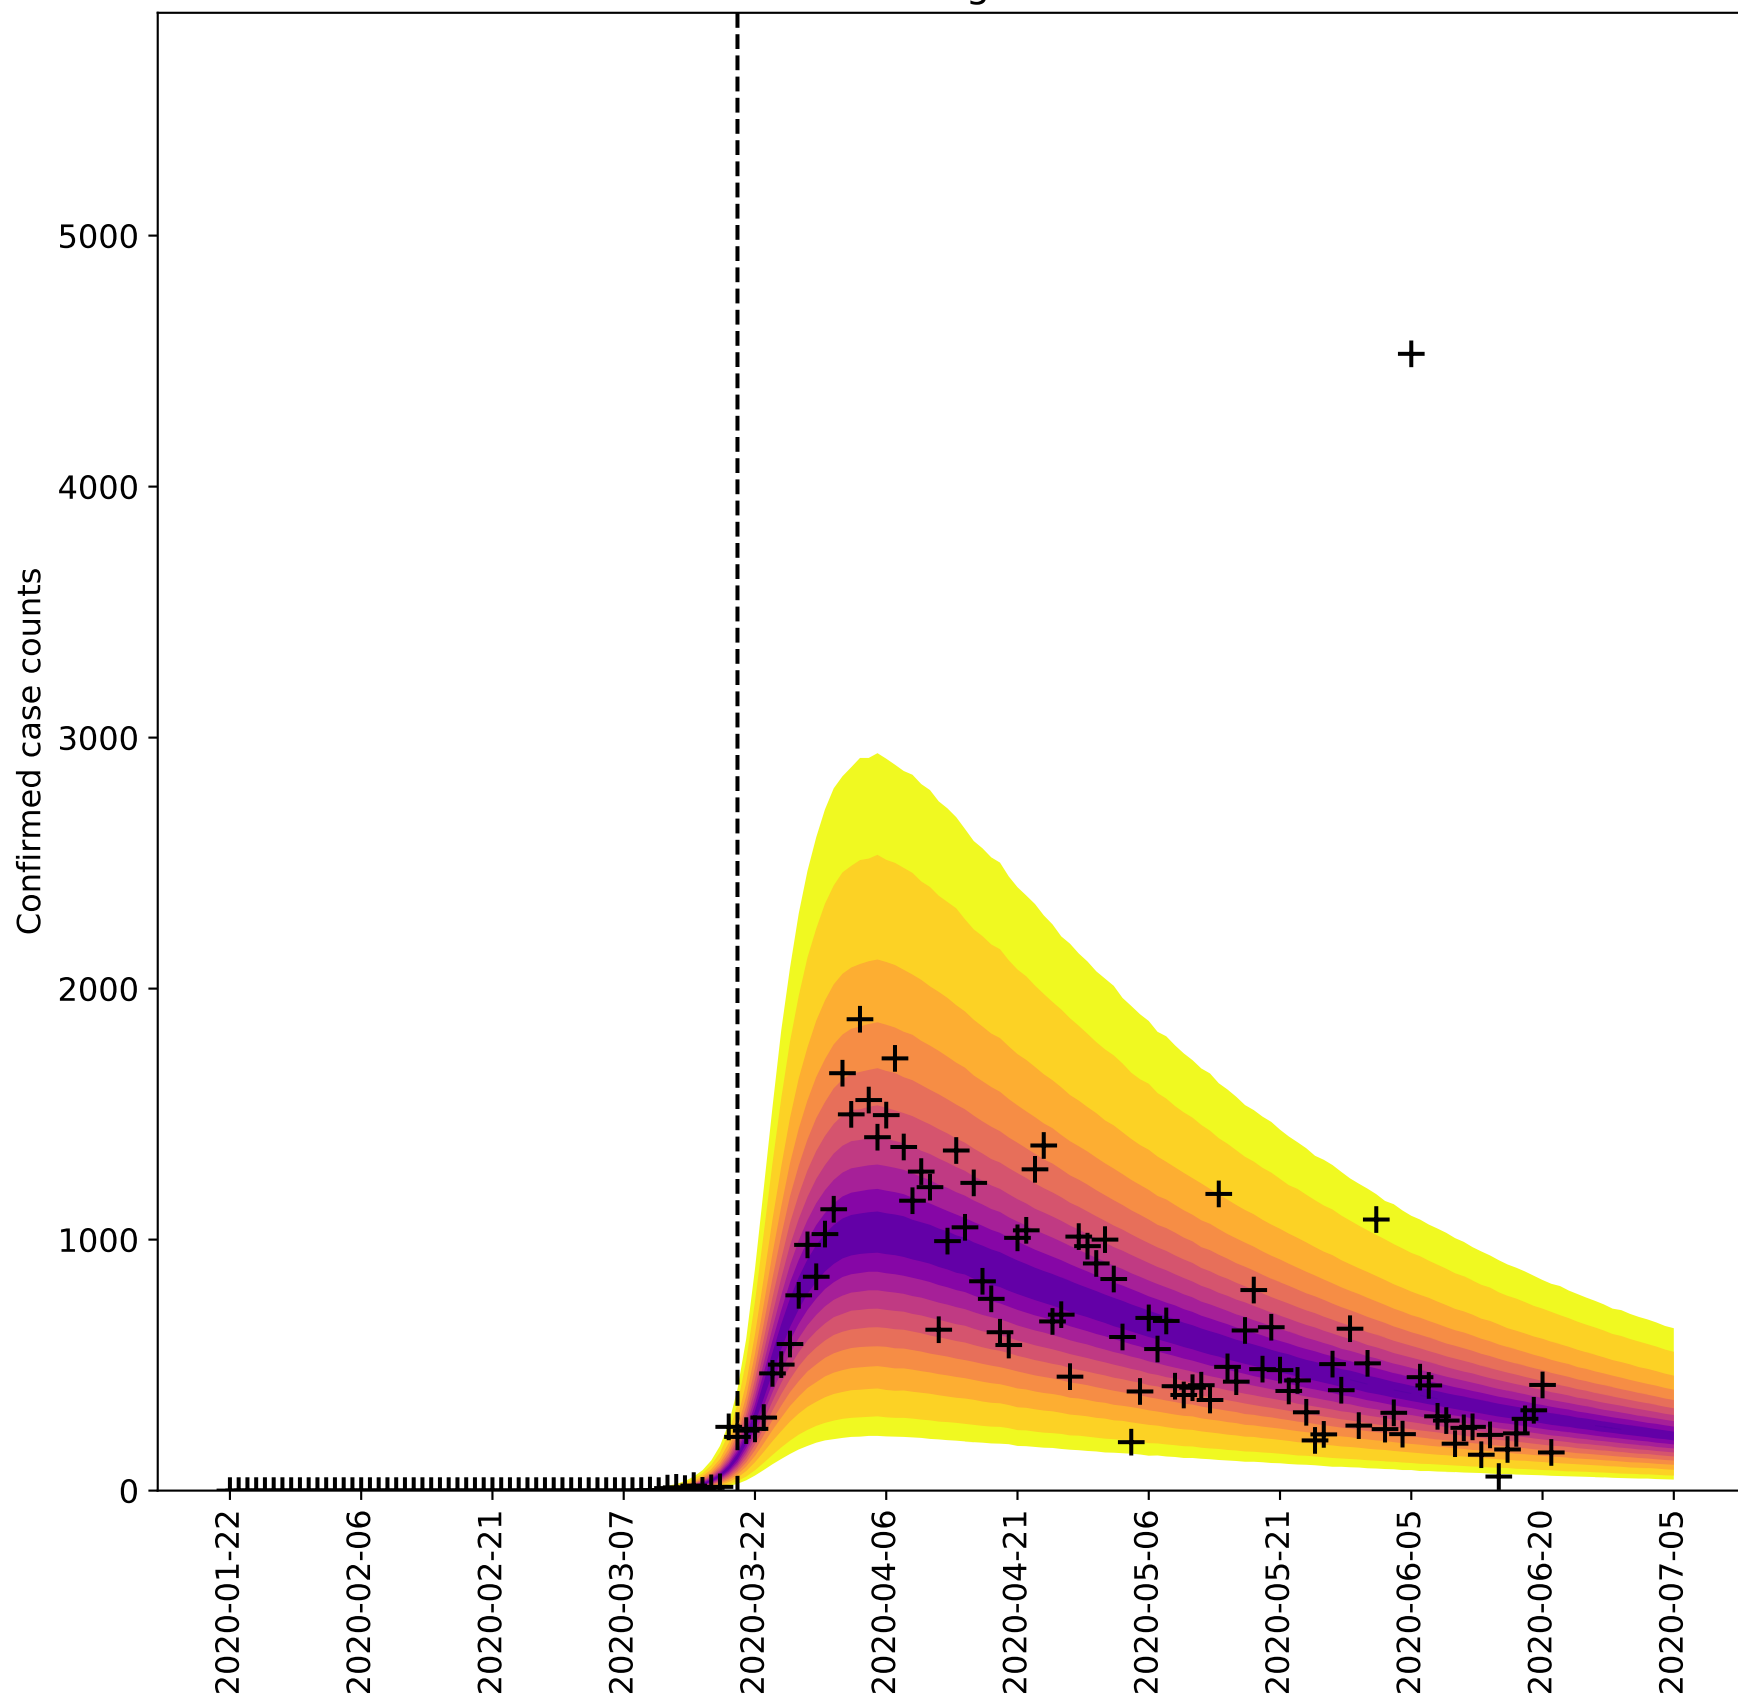

# Minnesota

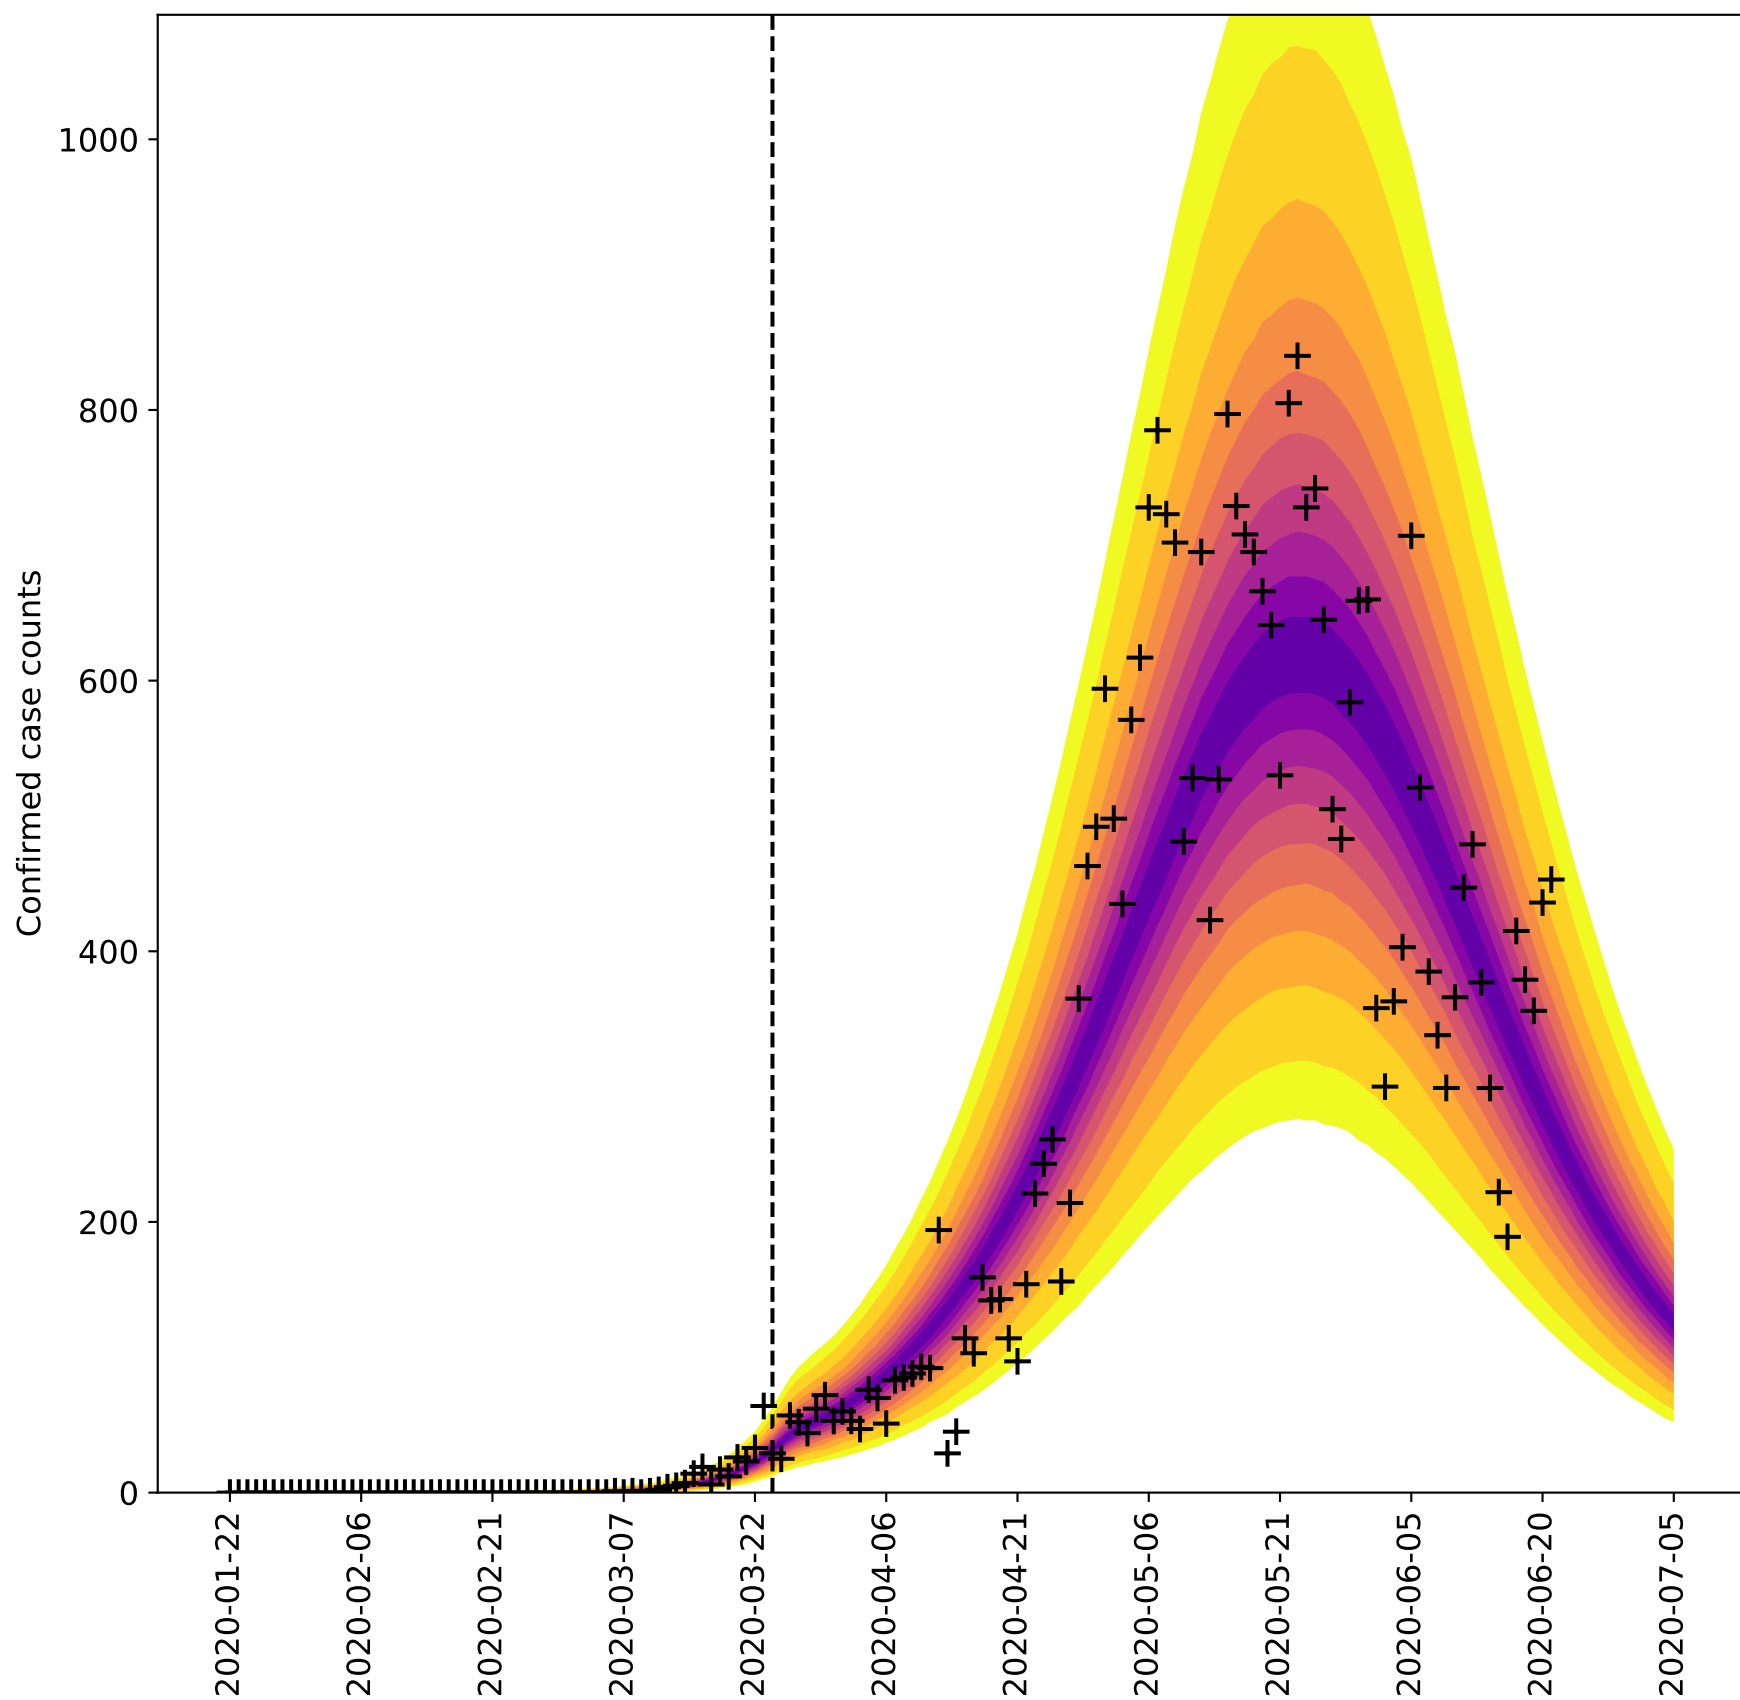

# Mississippi

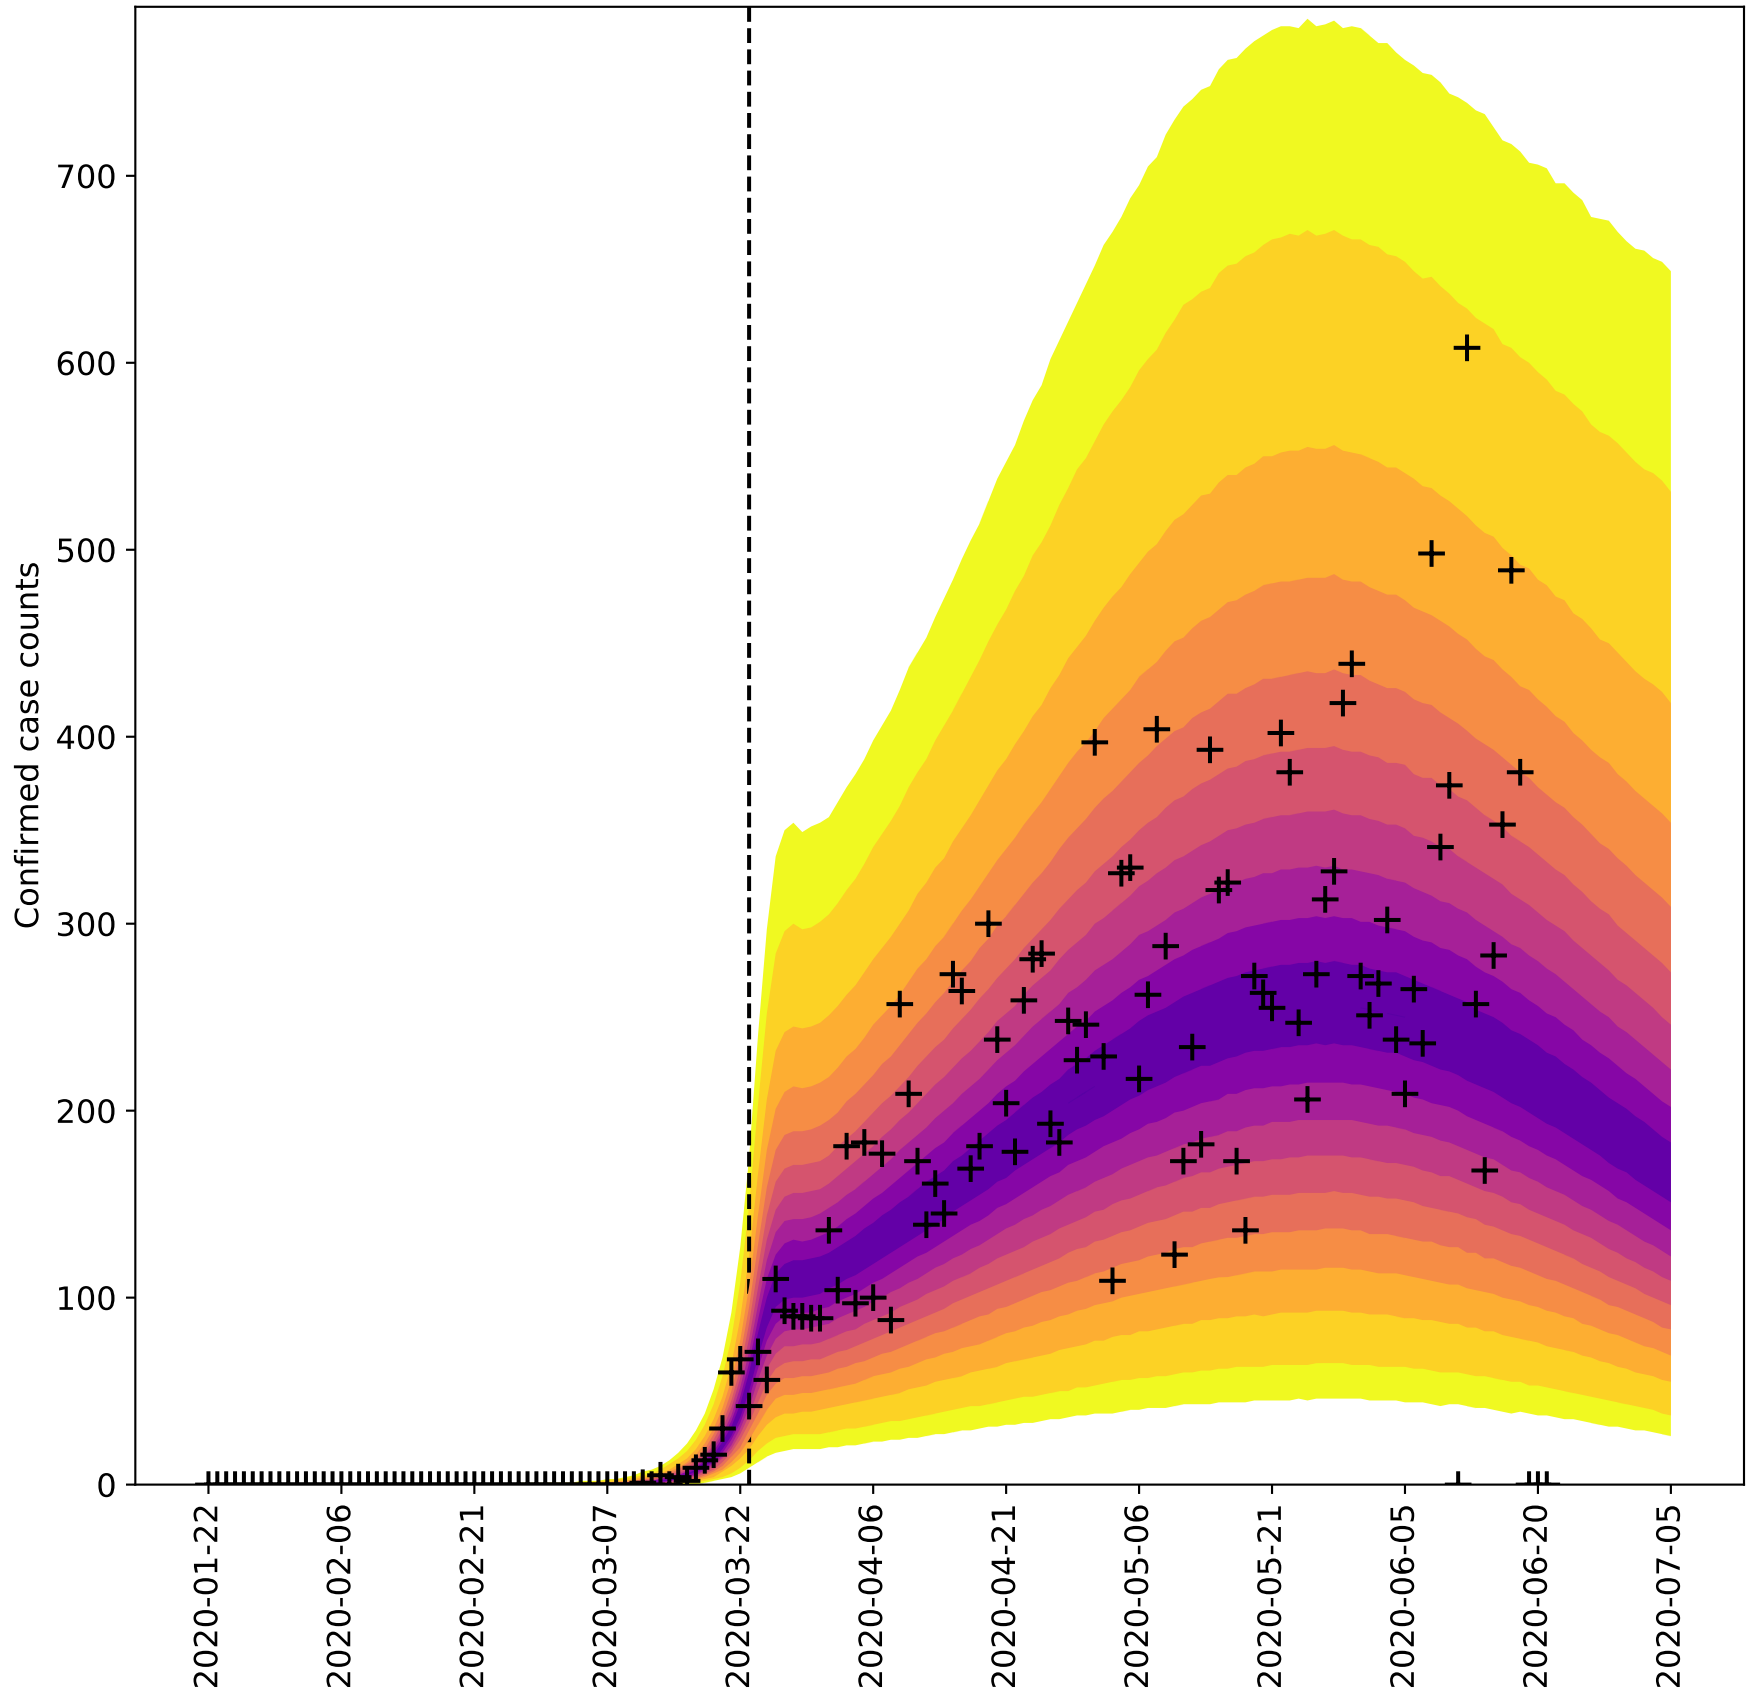

# Missouri

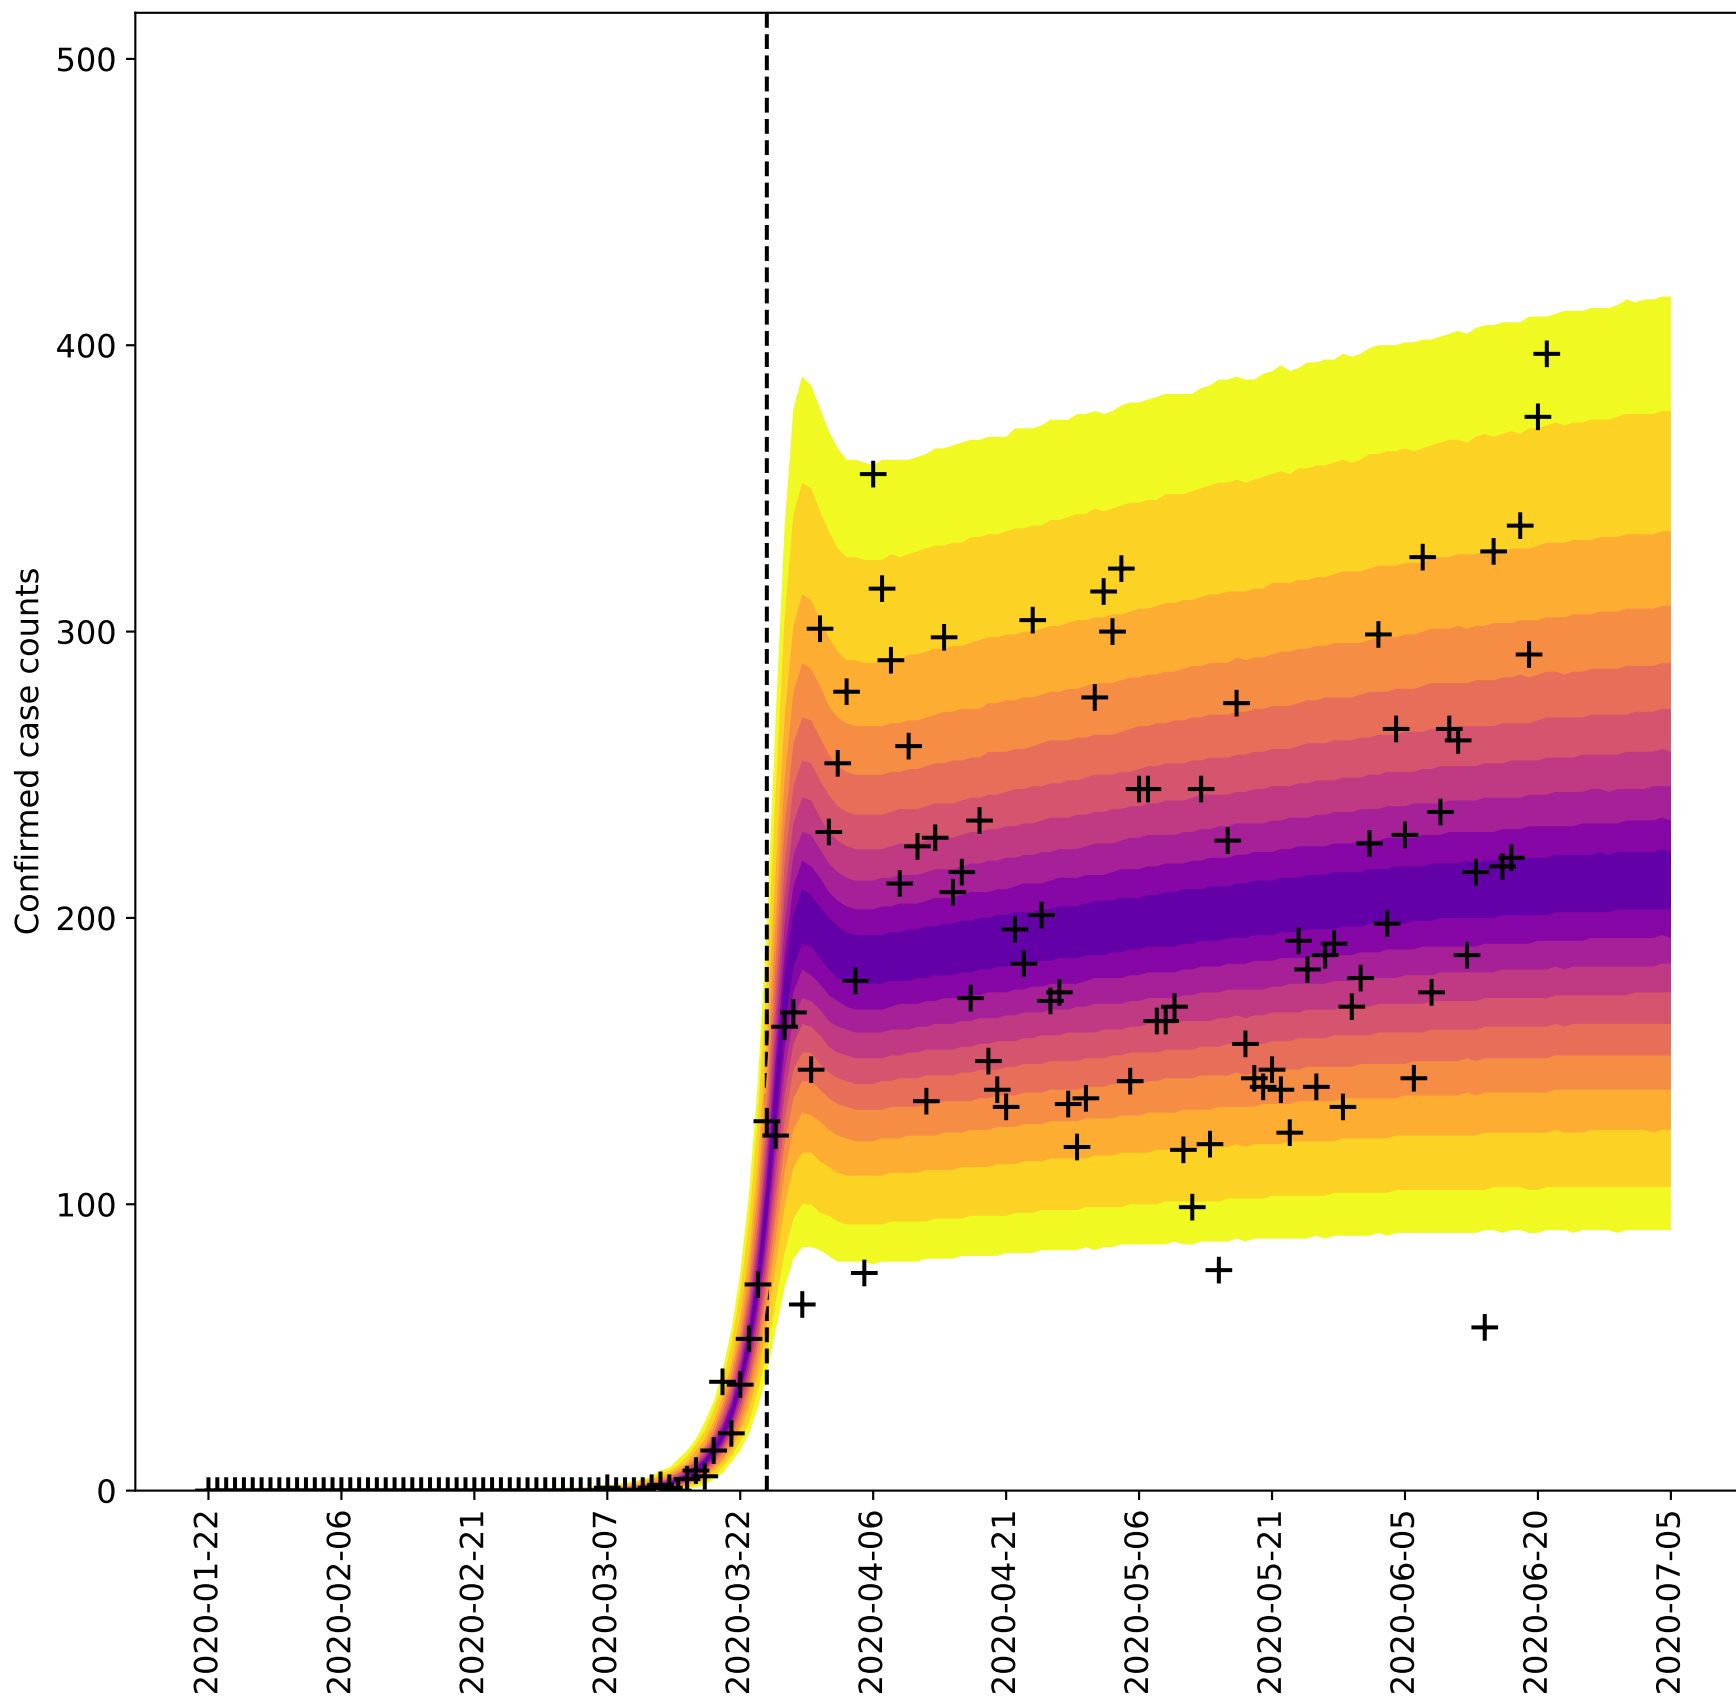



# Montana

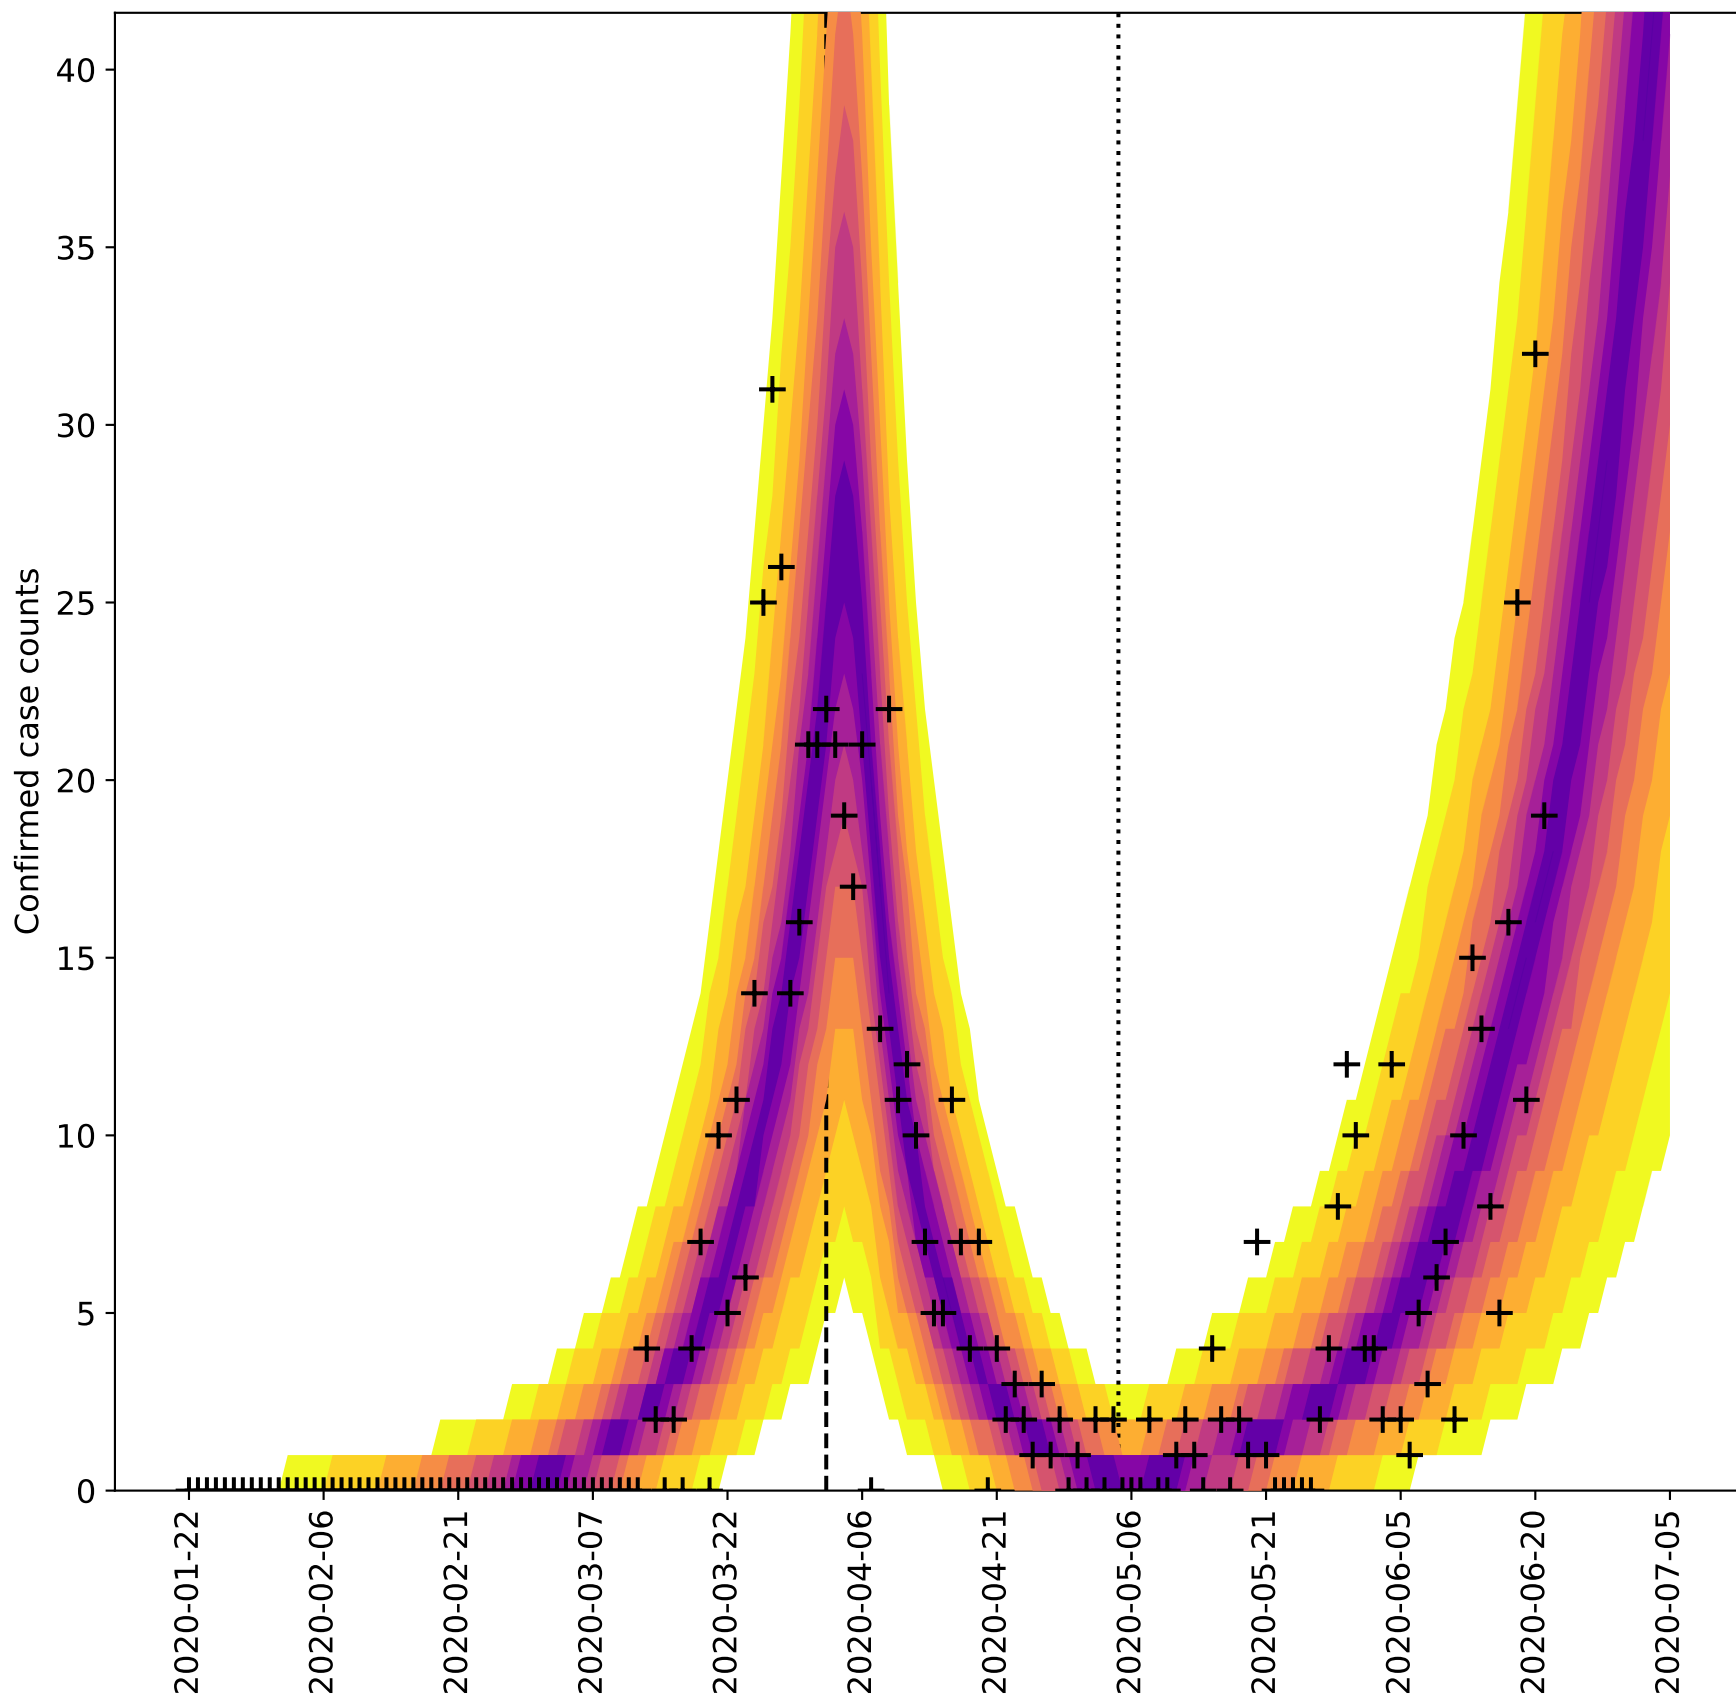

# Nebraska

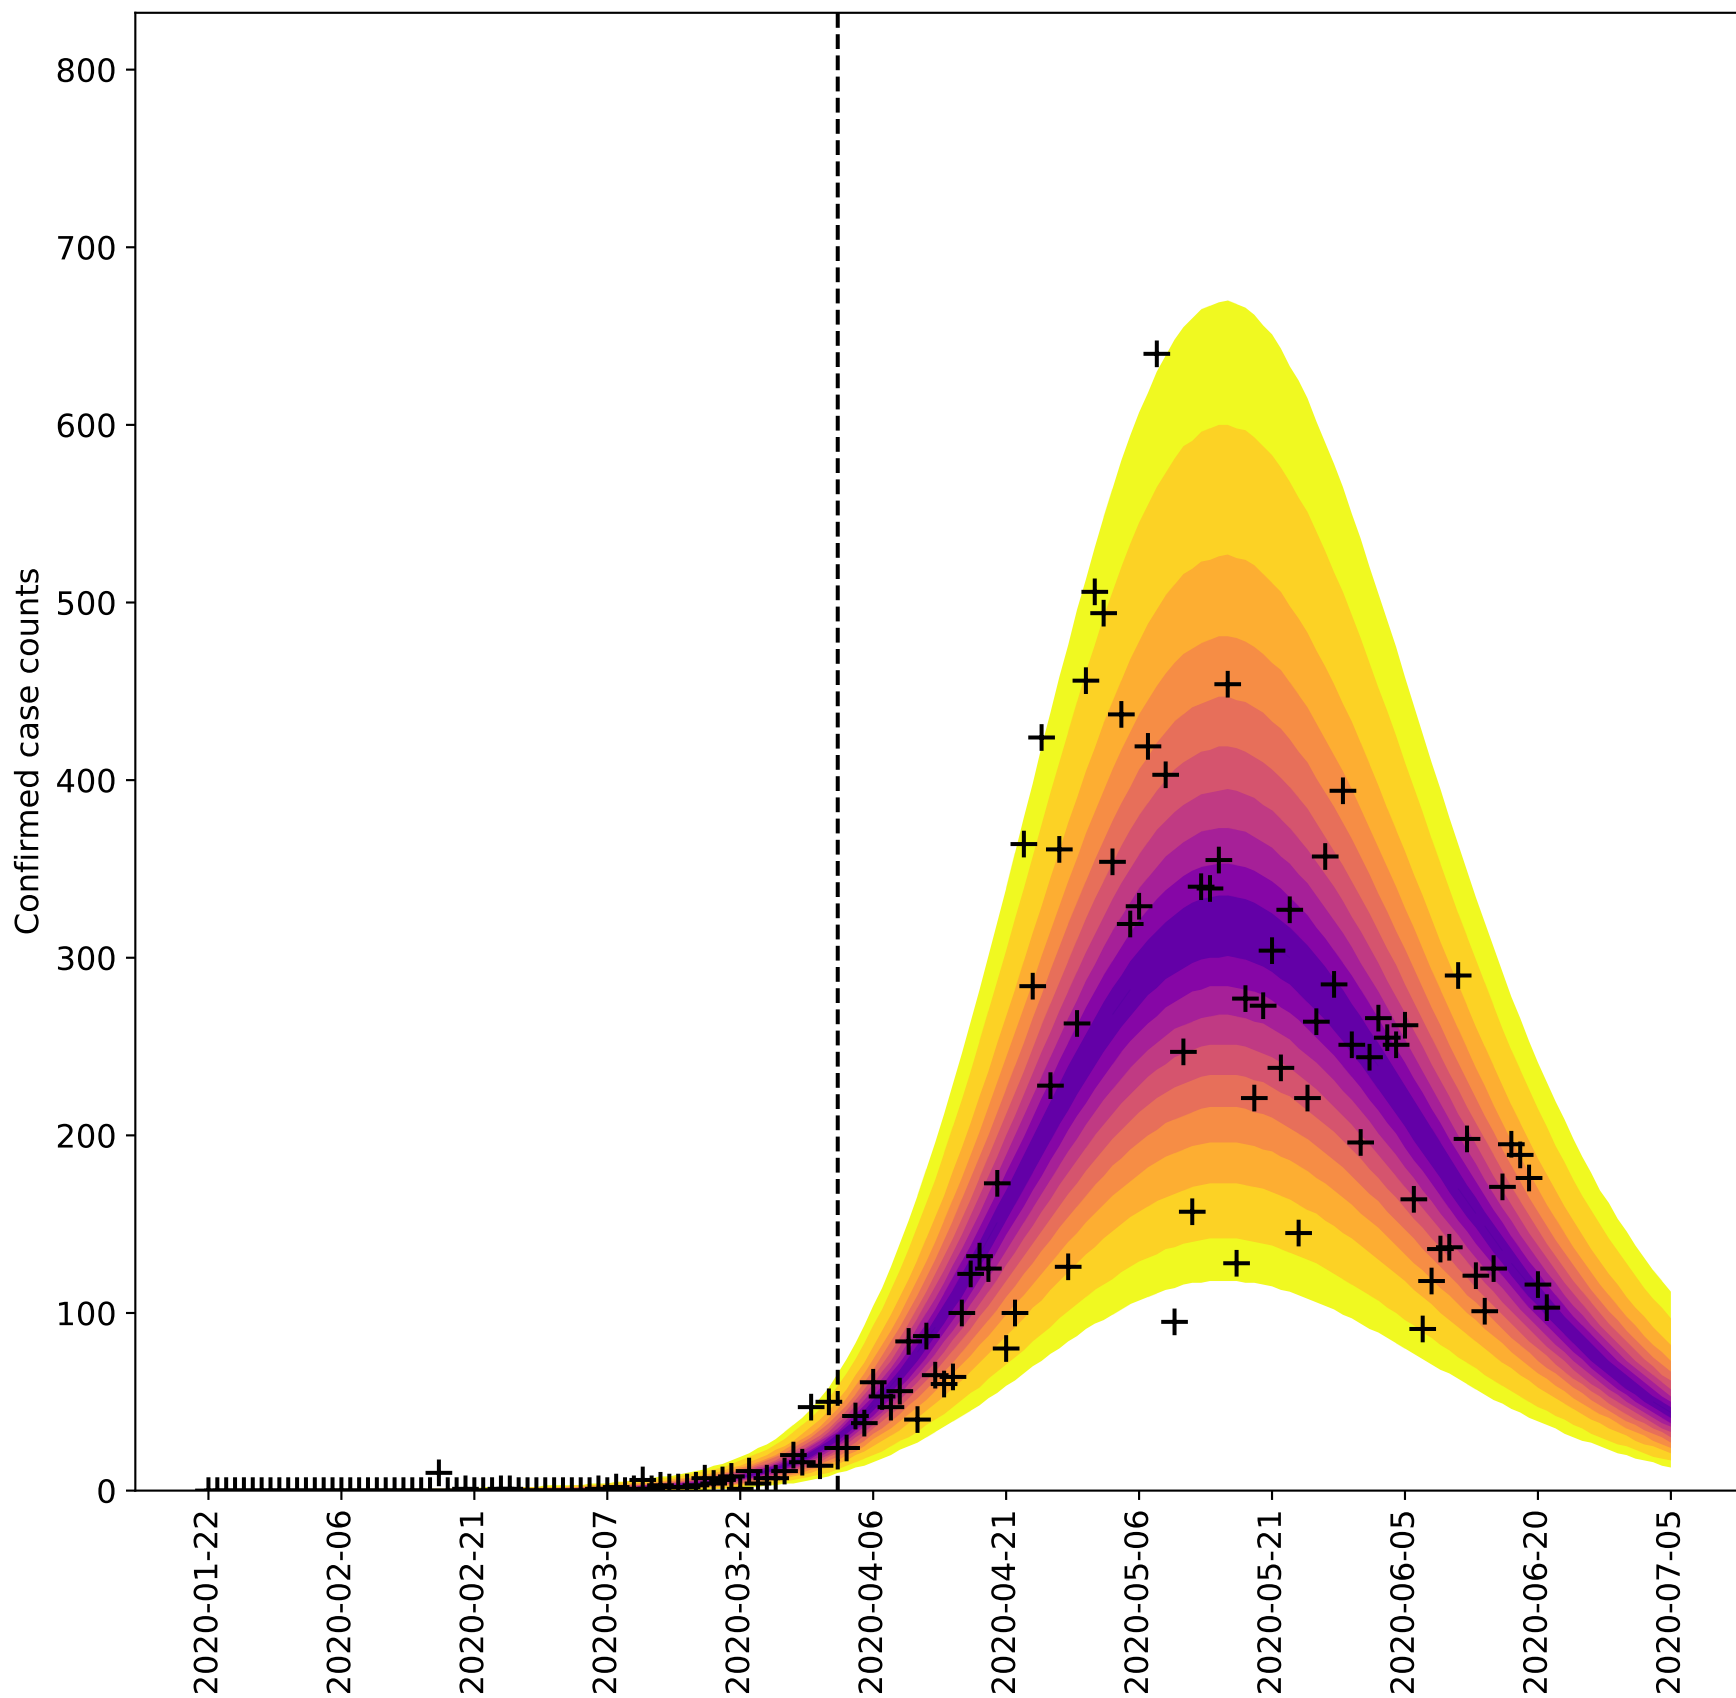

# Nevada

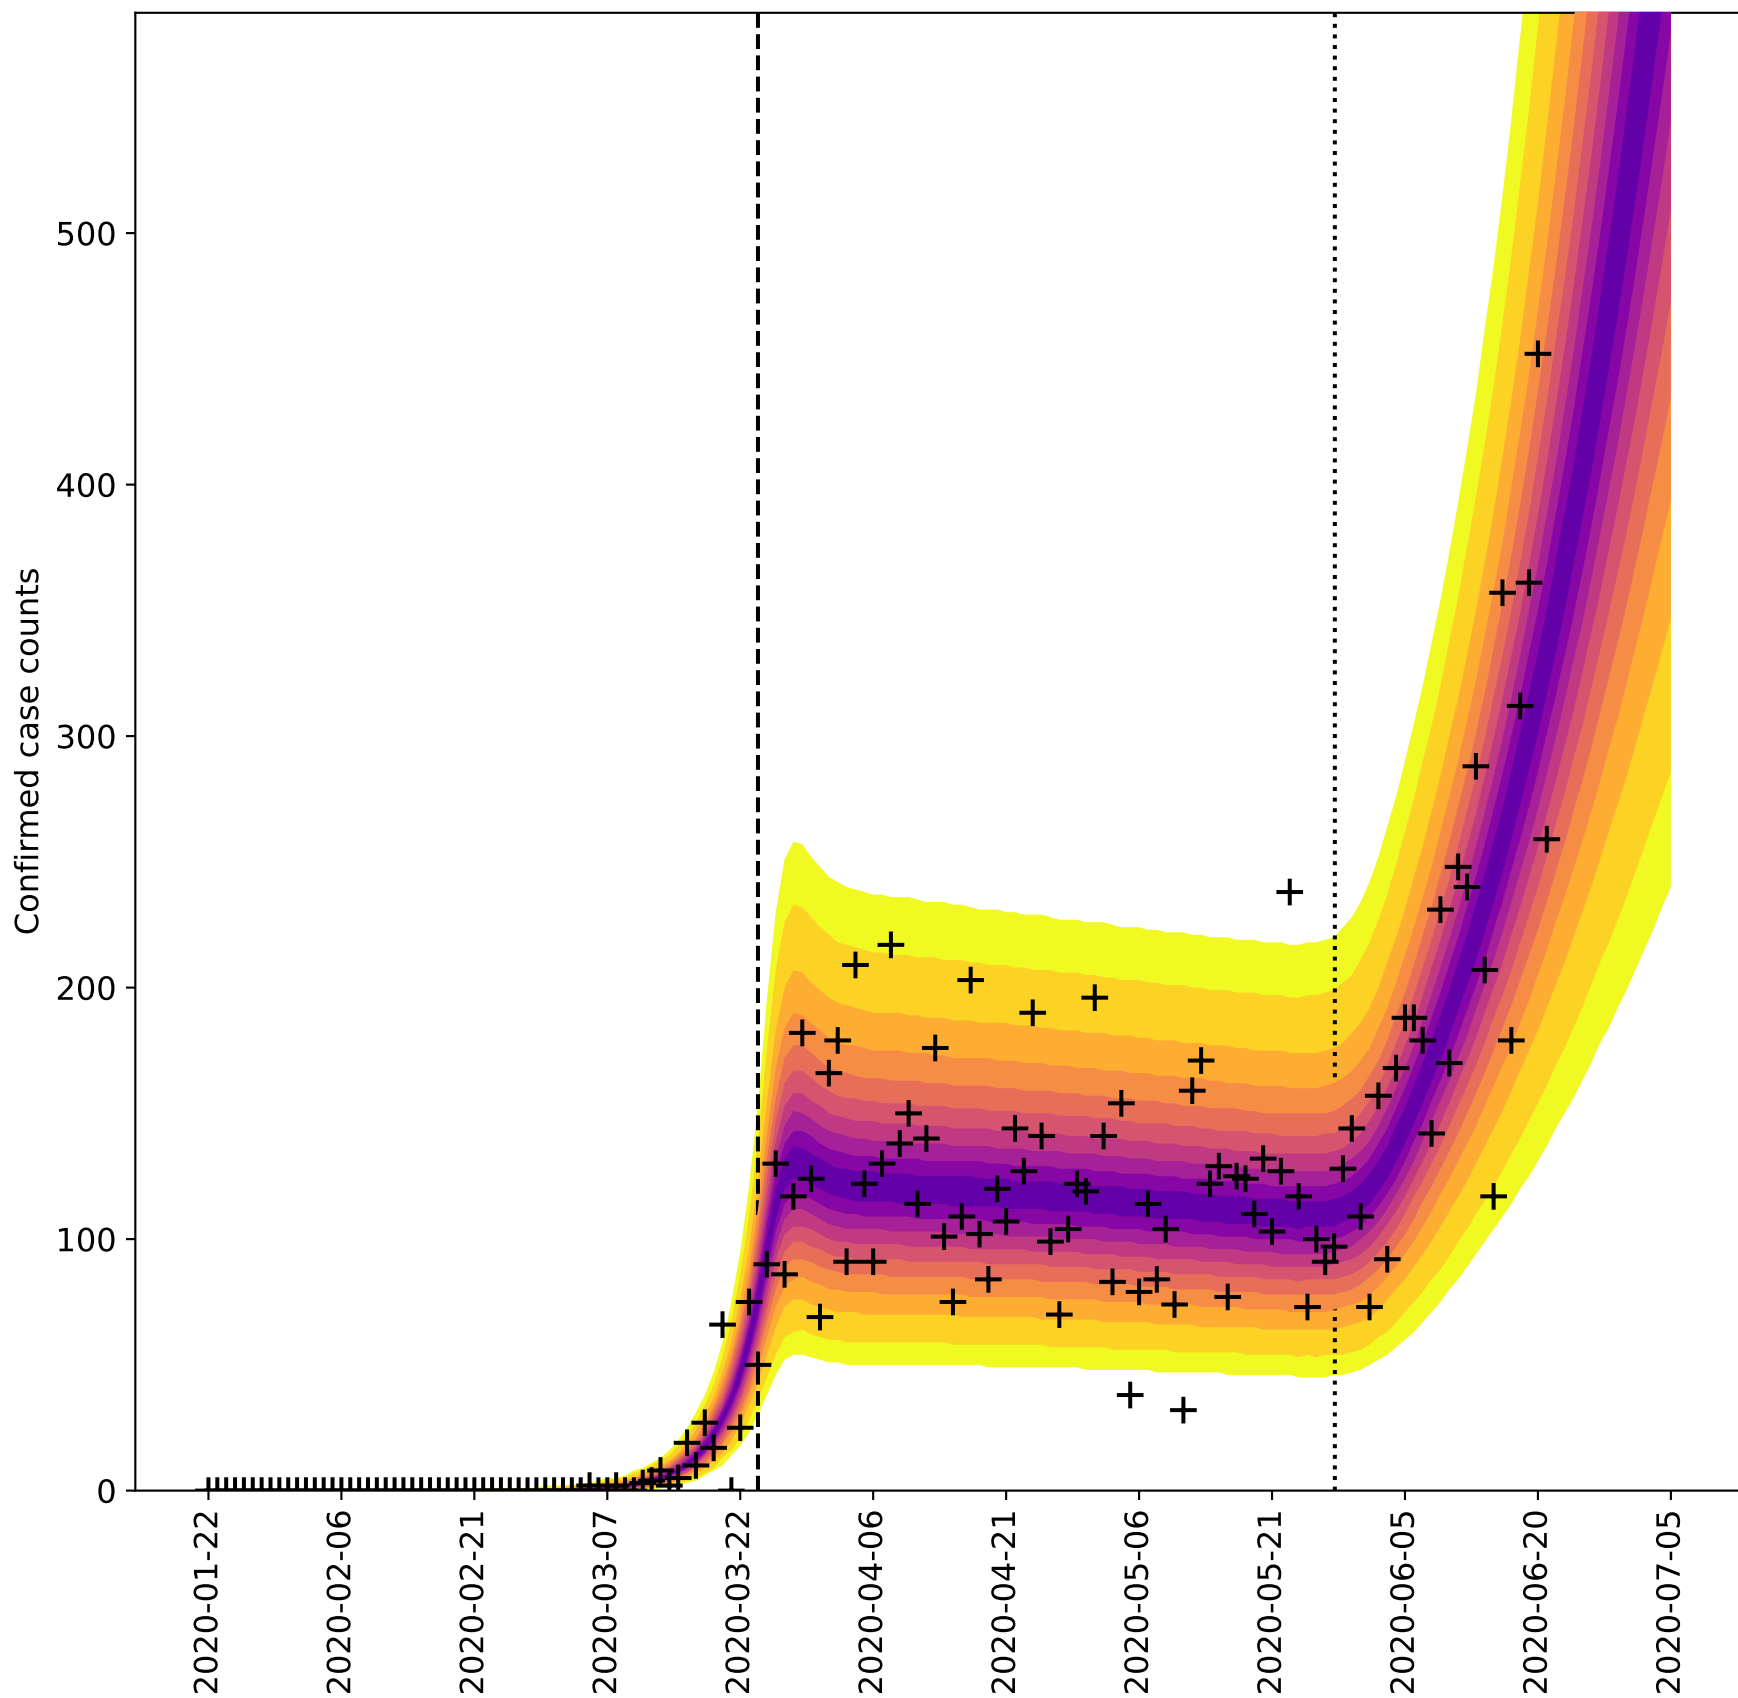

# New Hampshire

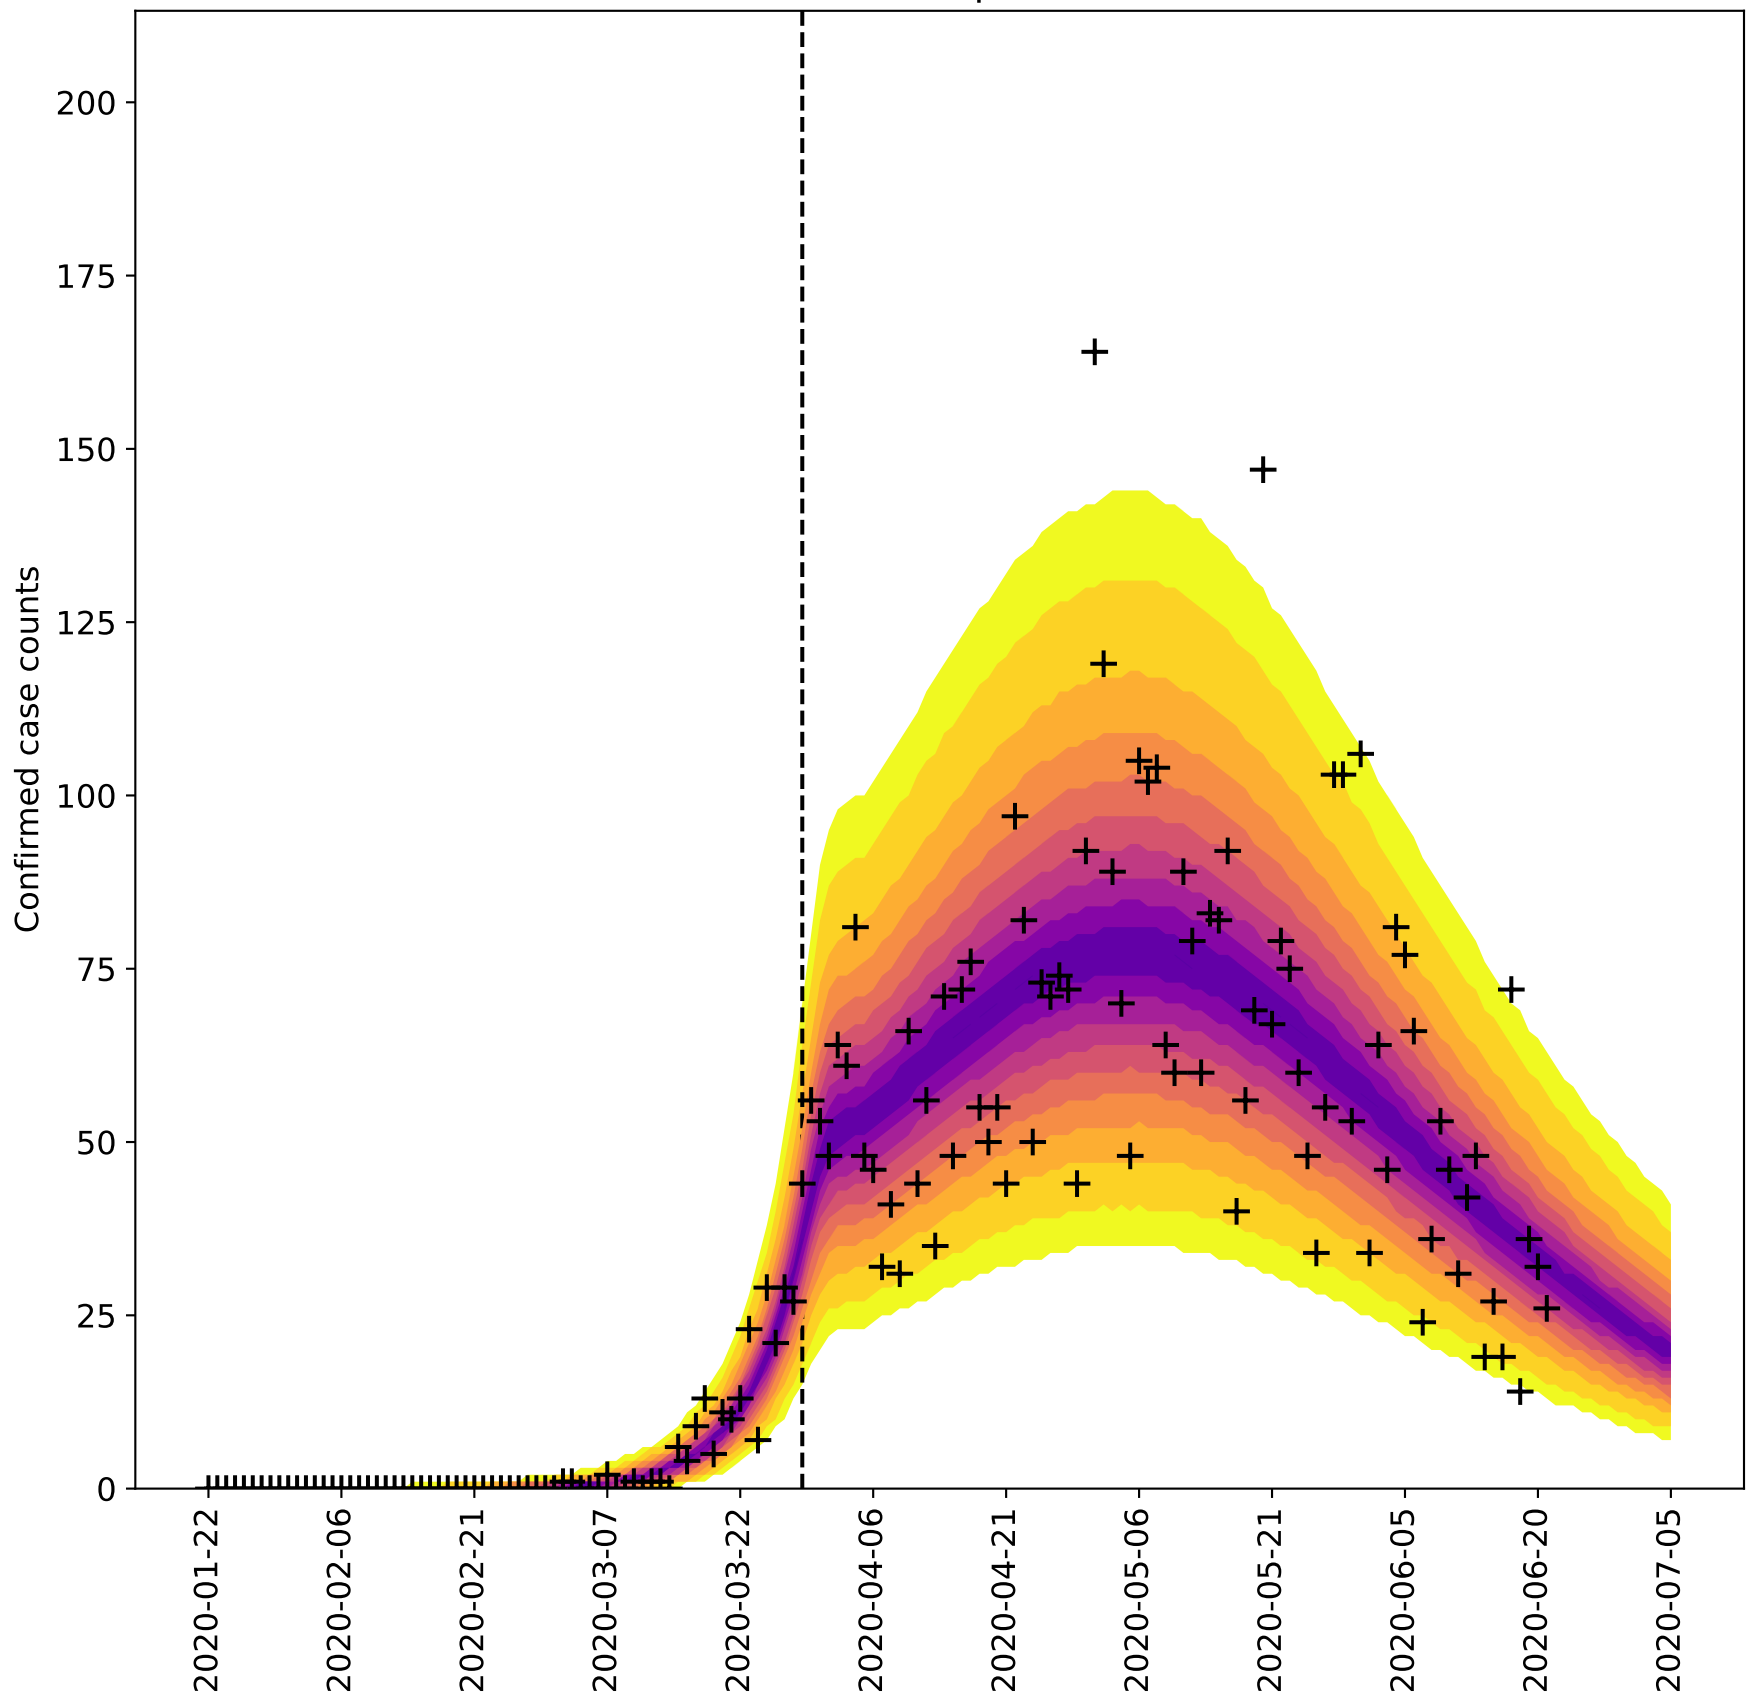

# New Mexico

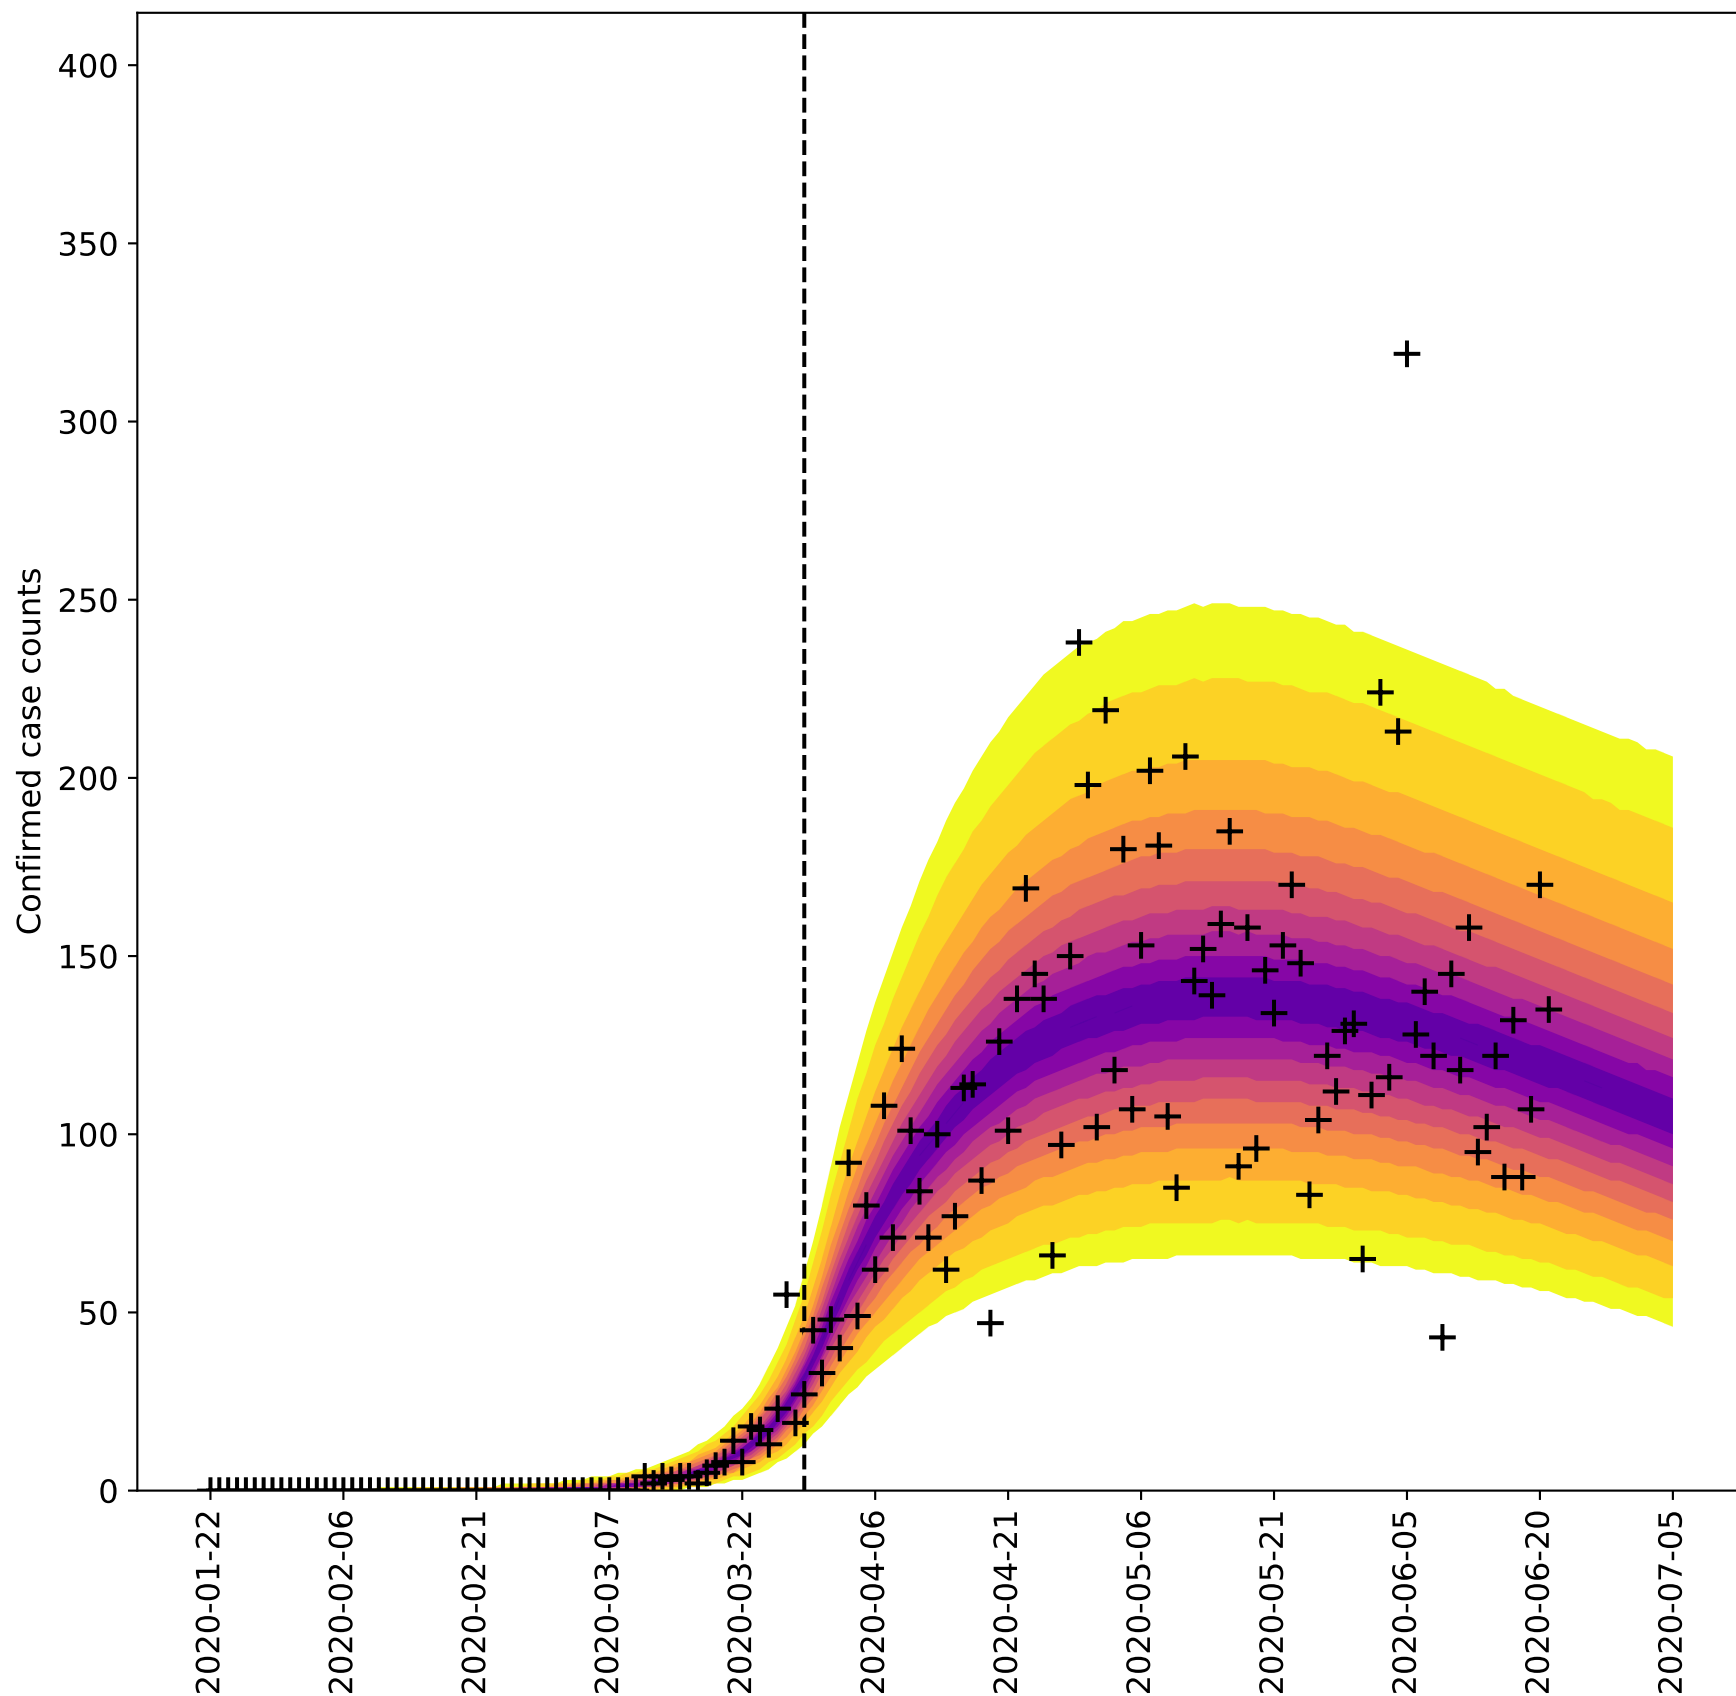

# New York

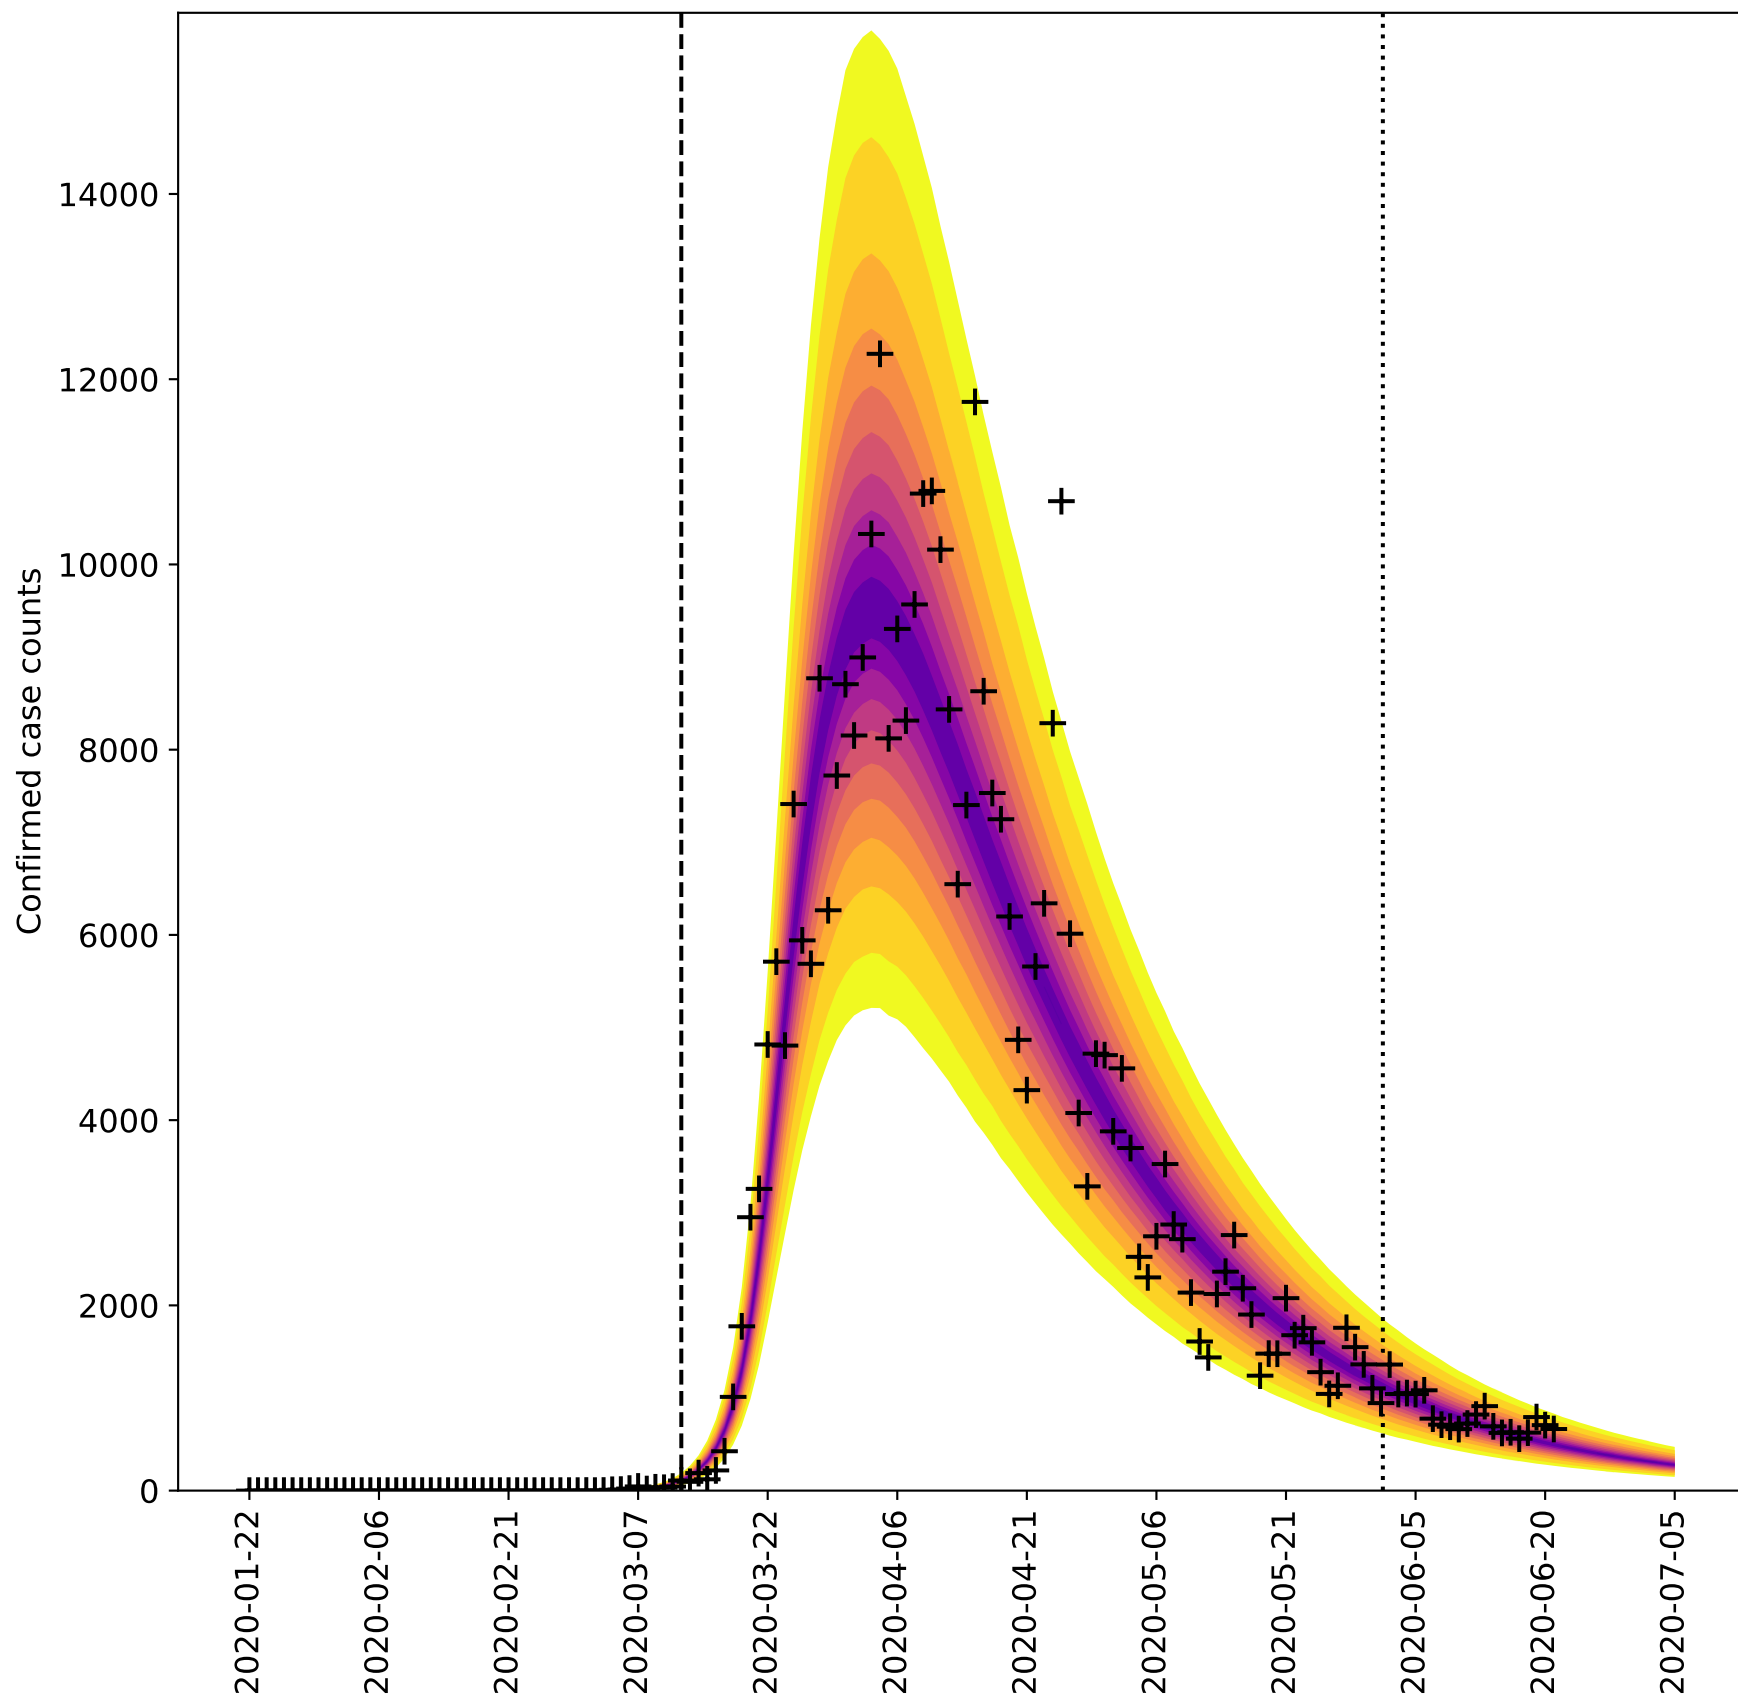

# North Carolina

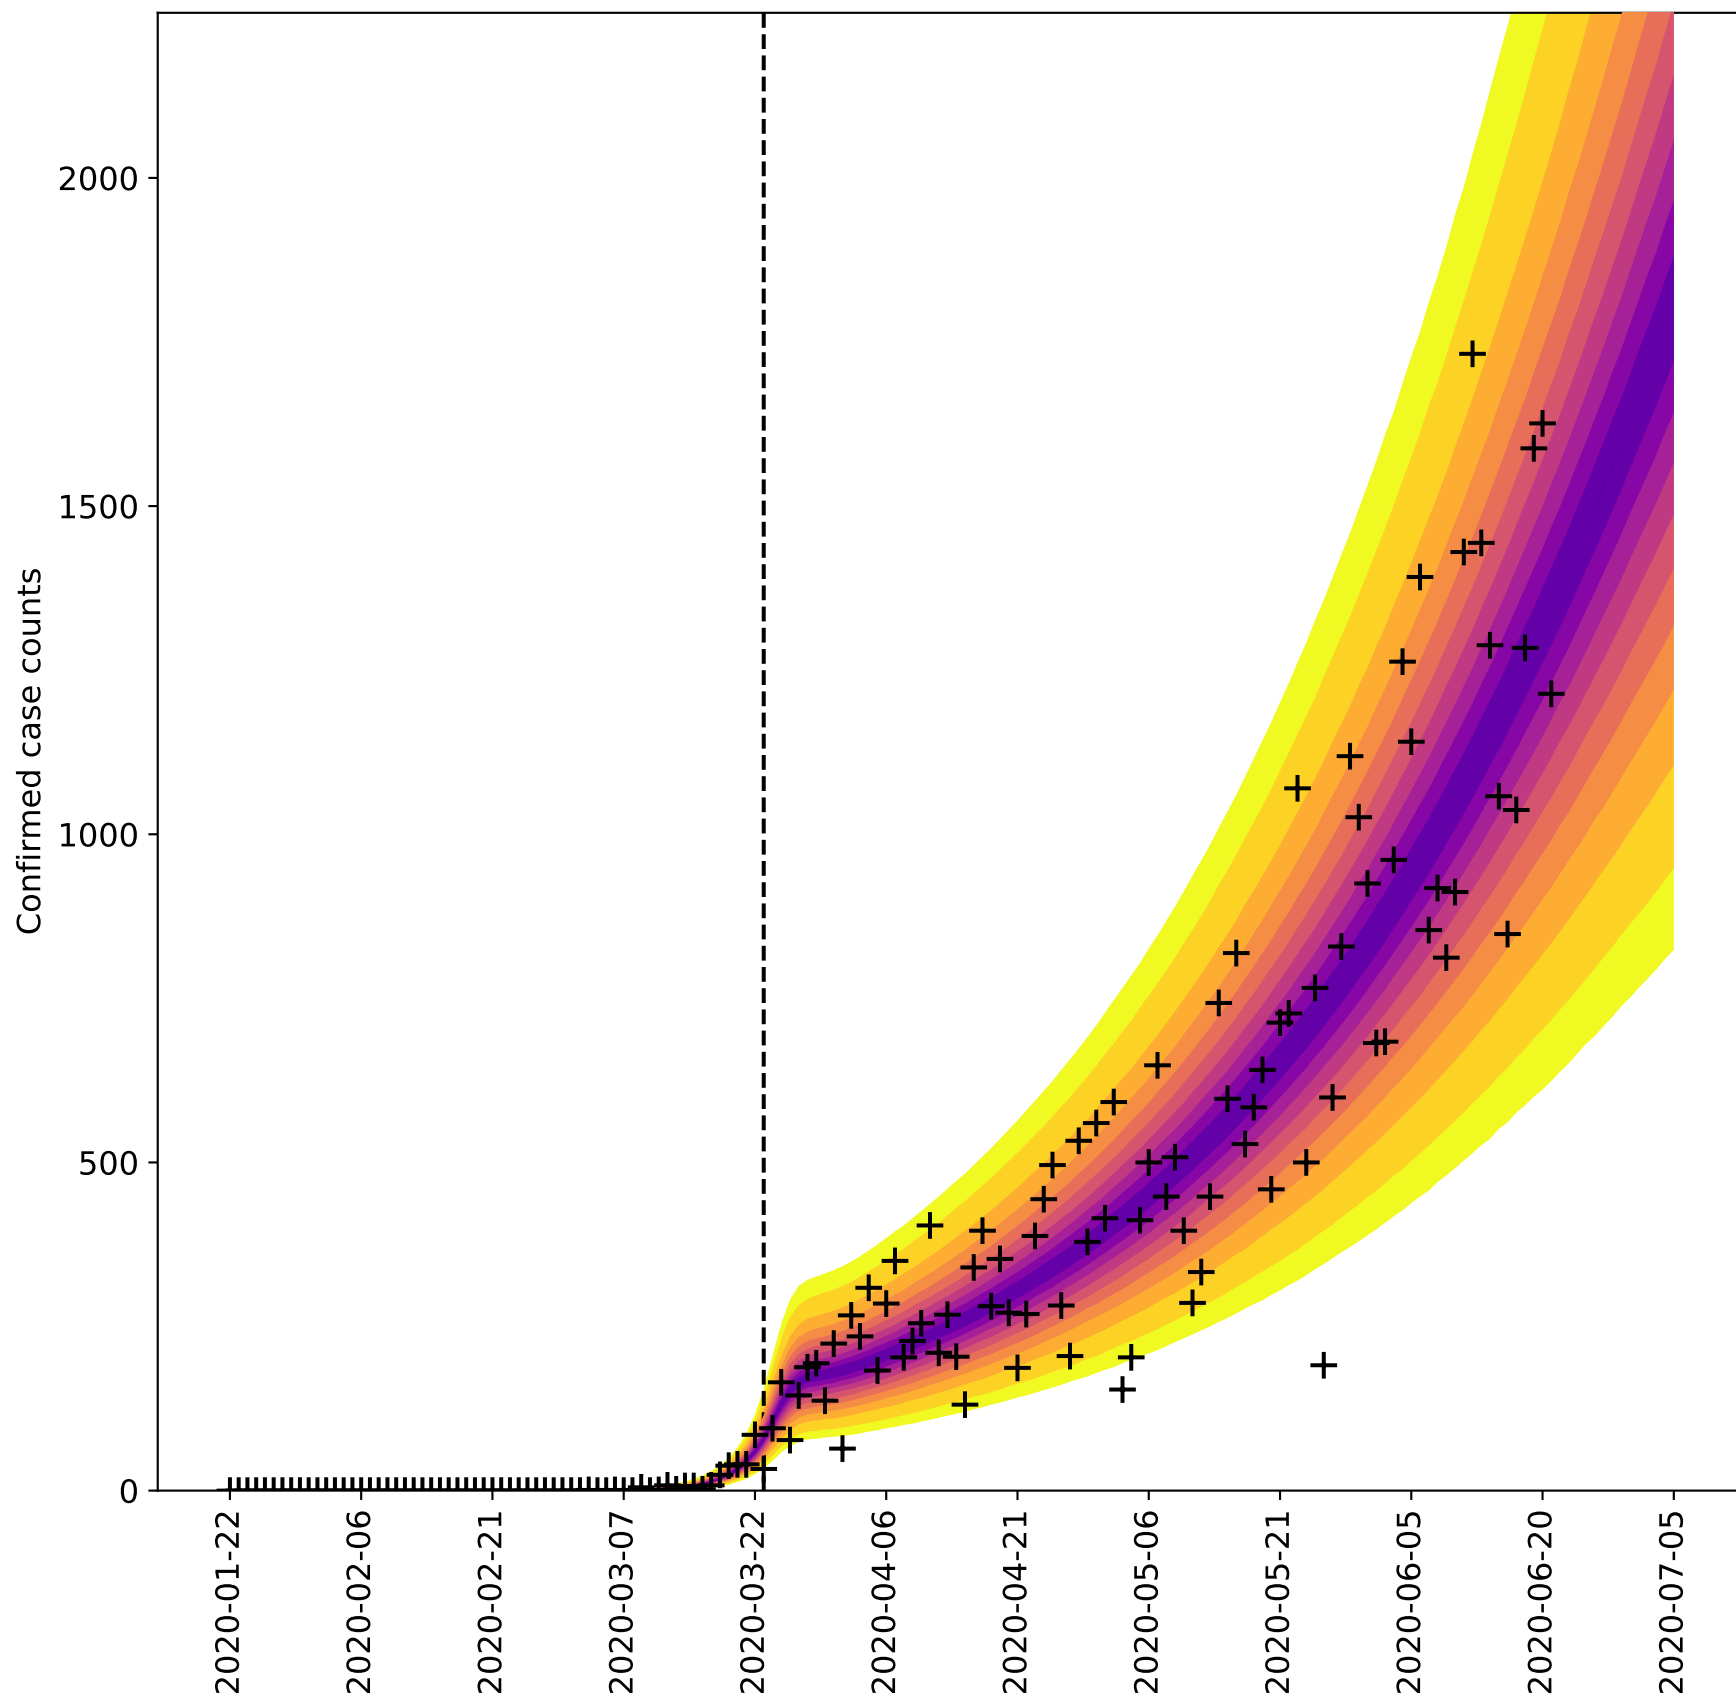

# North Dakota

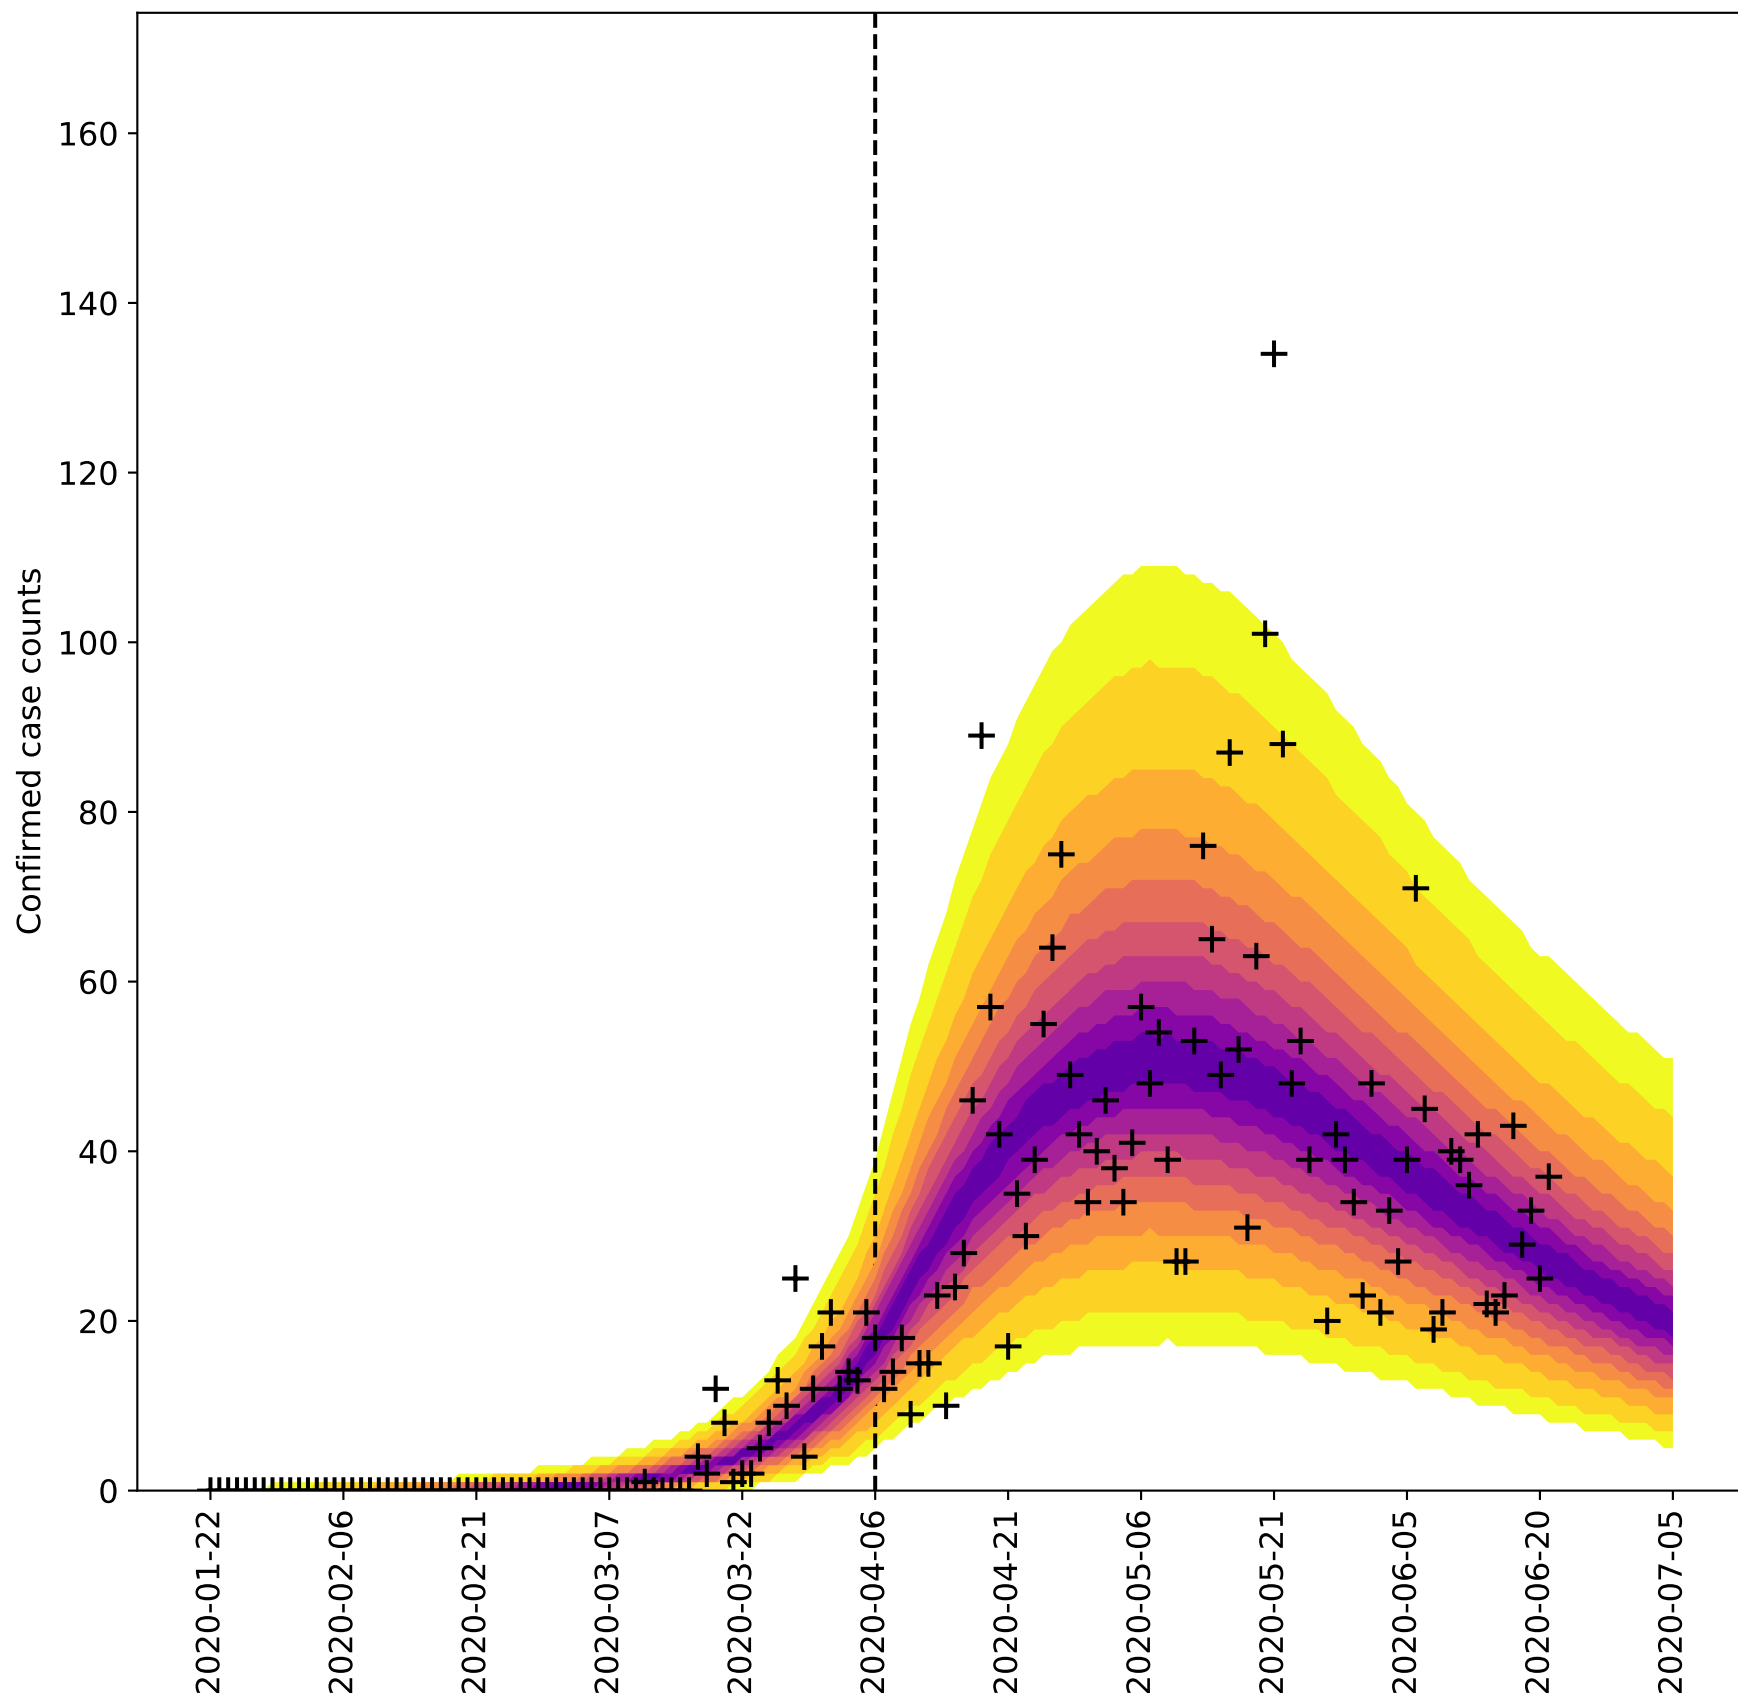



# Ohio

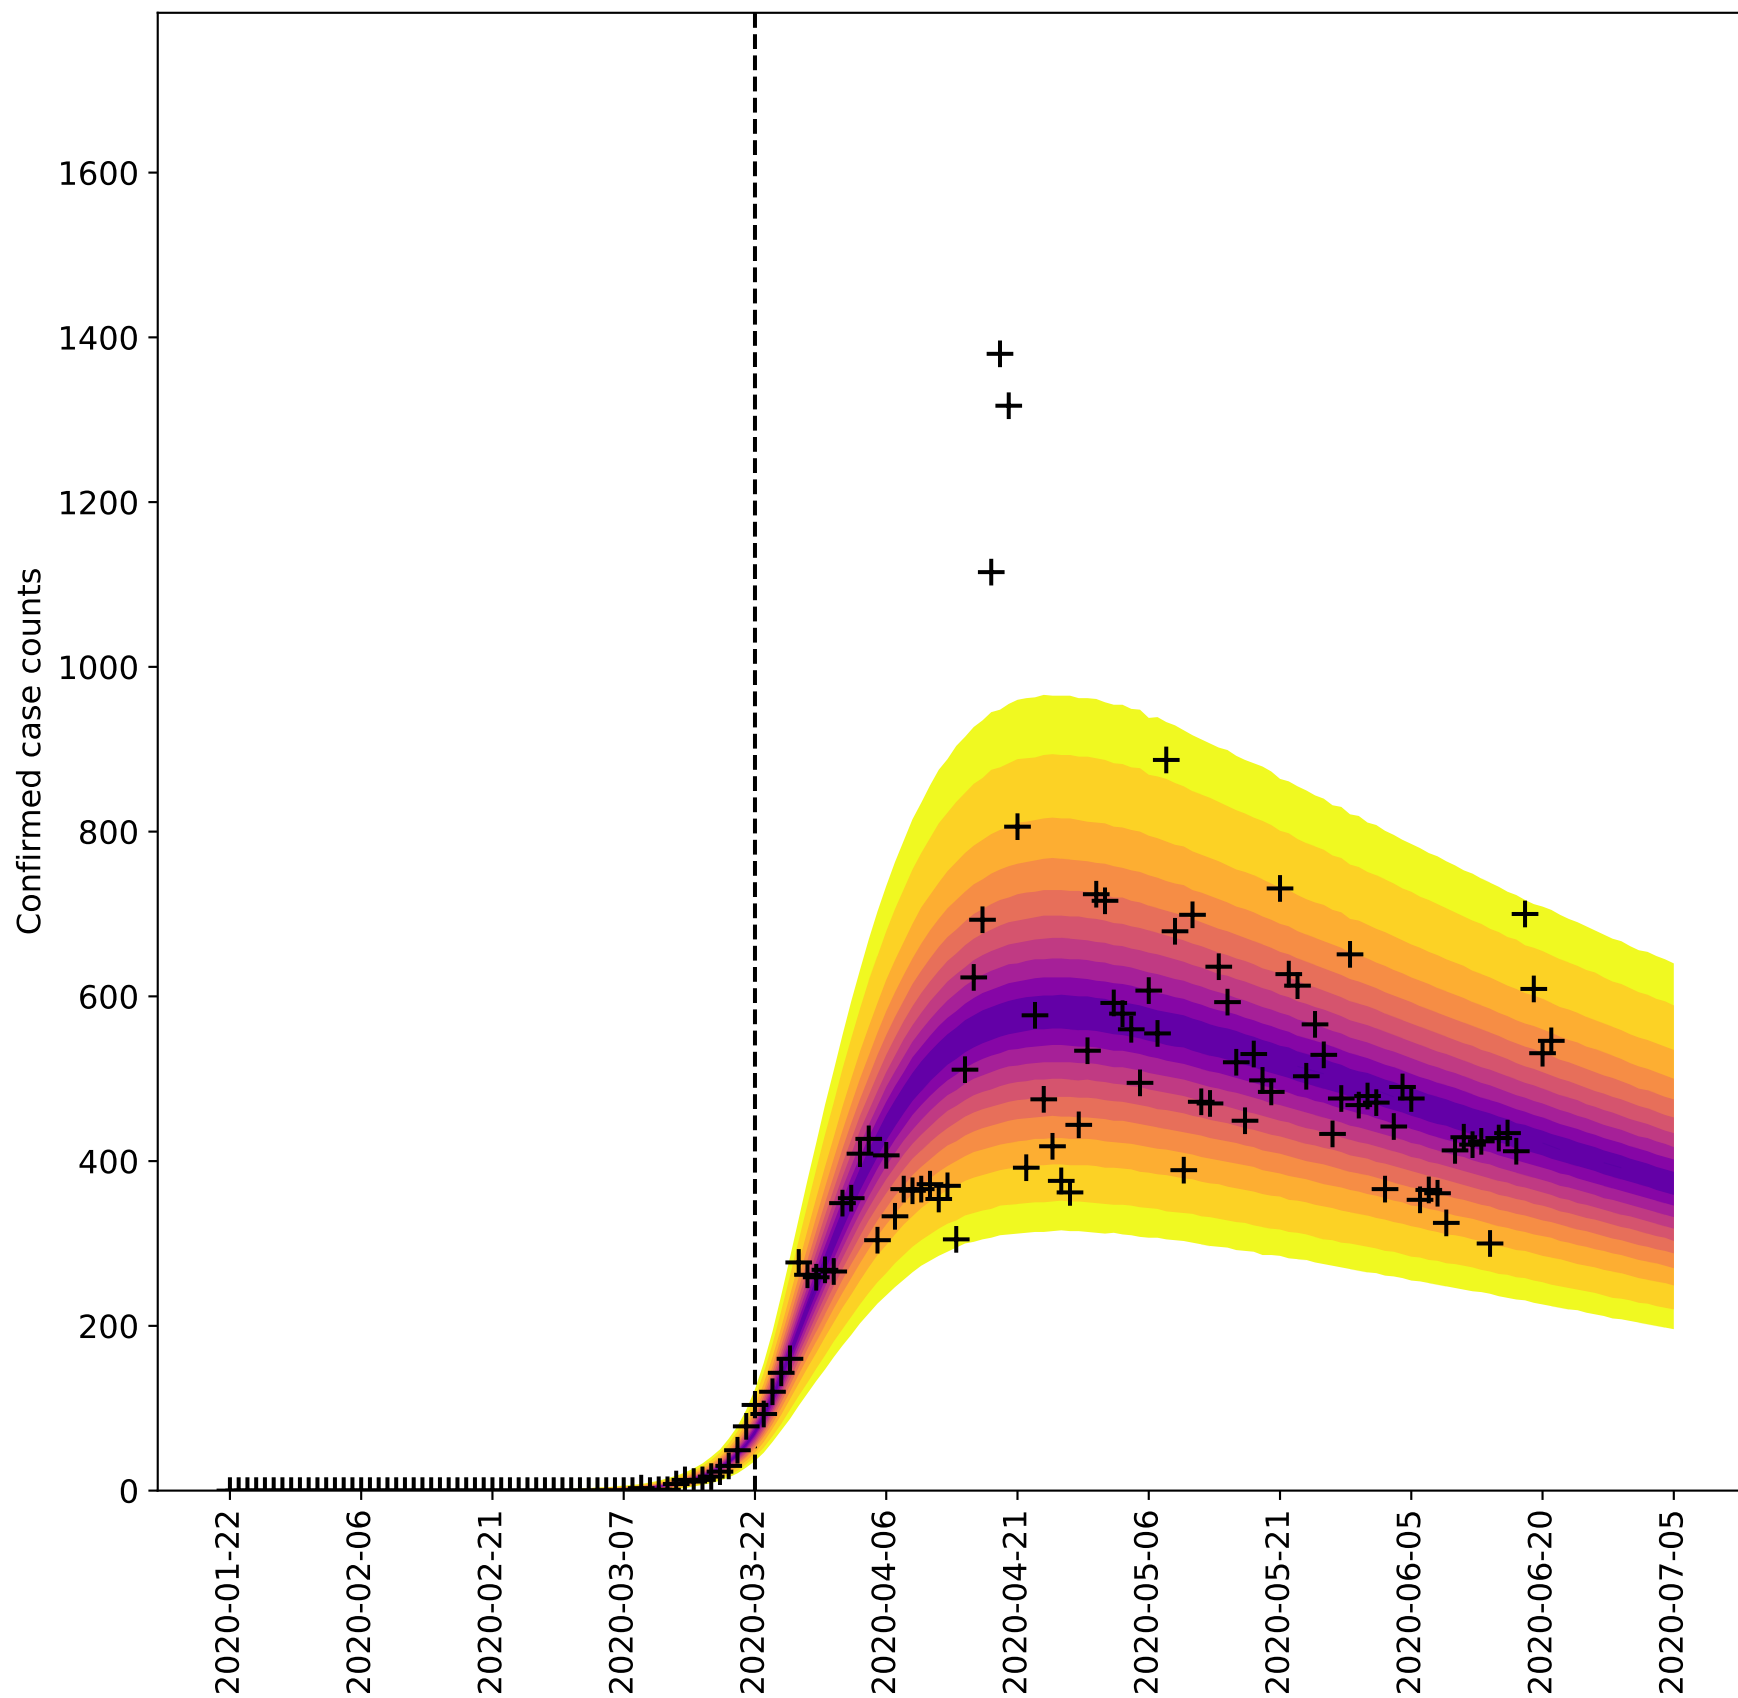

# Oklahoma

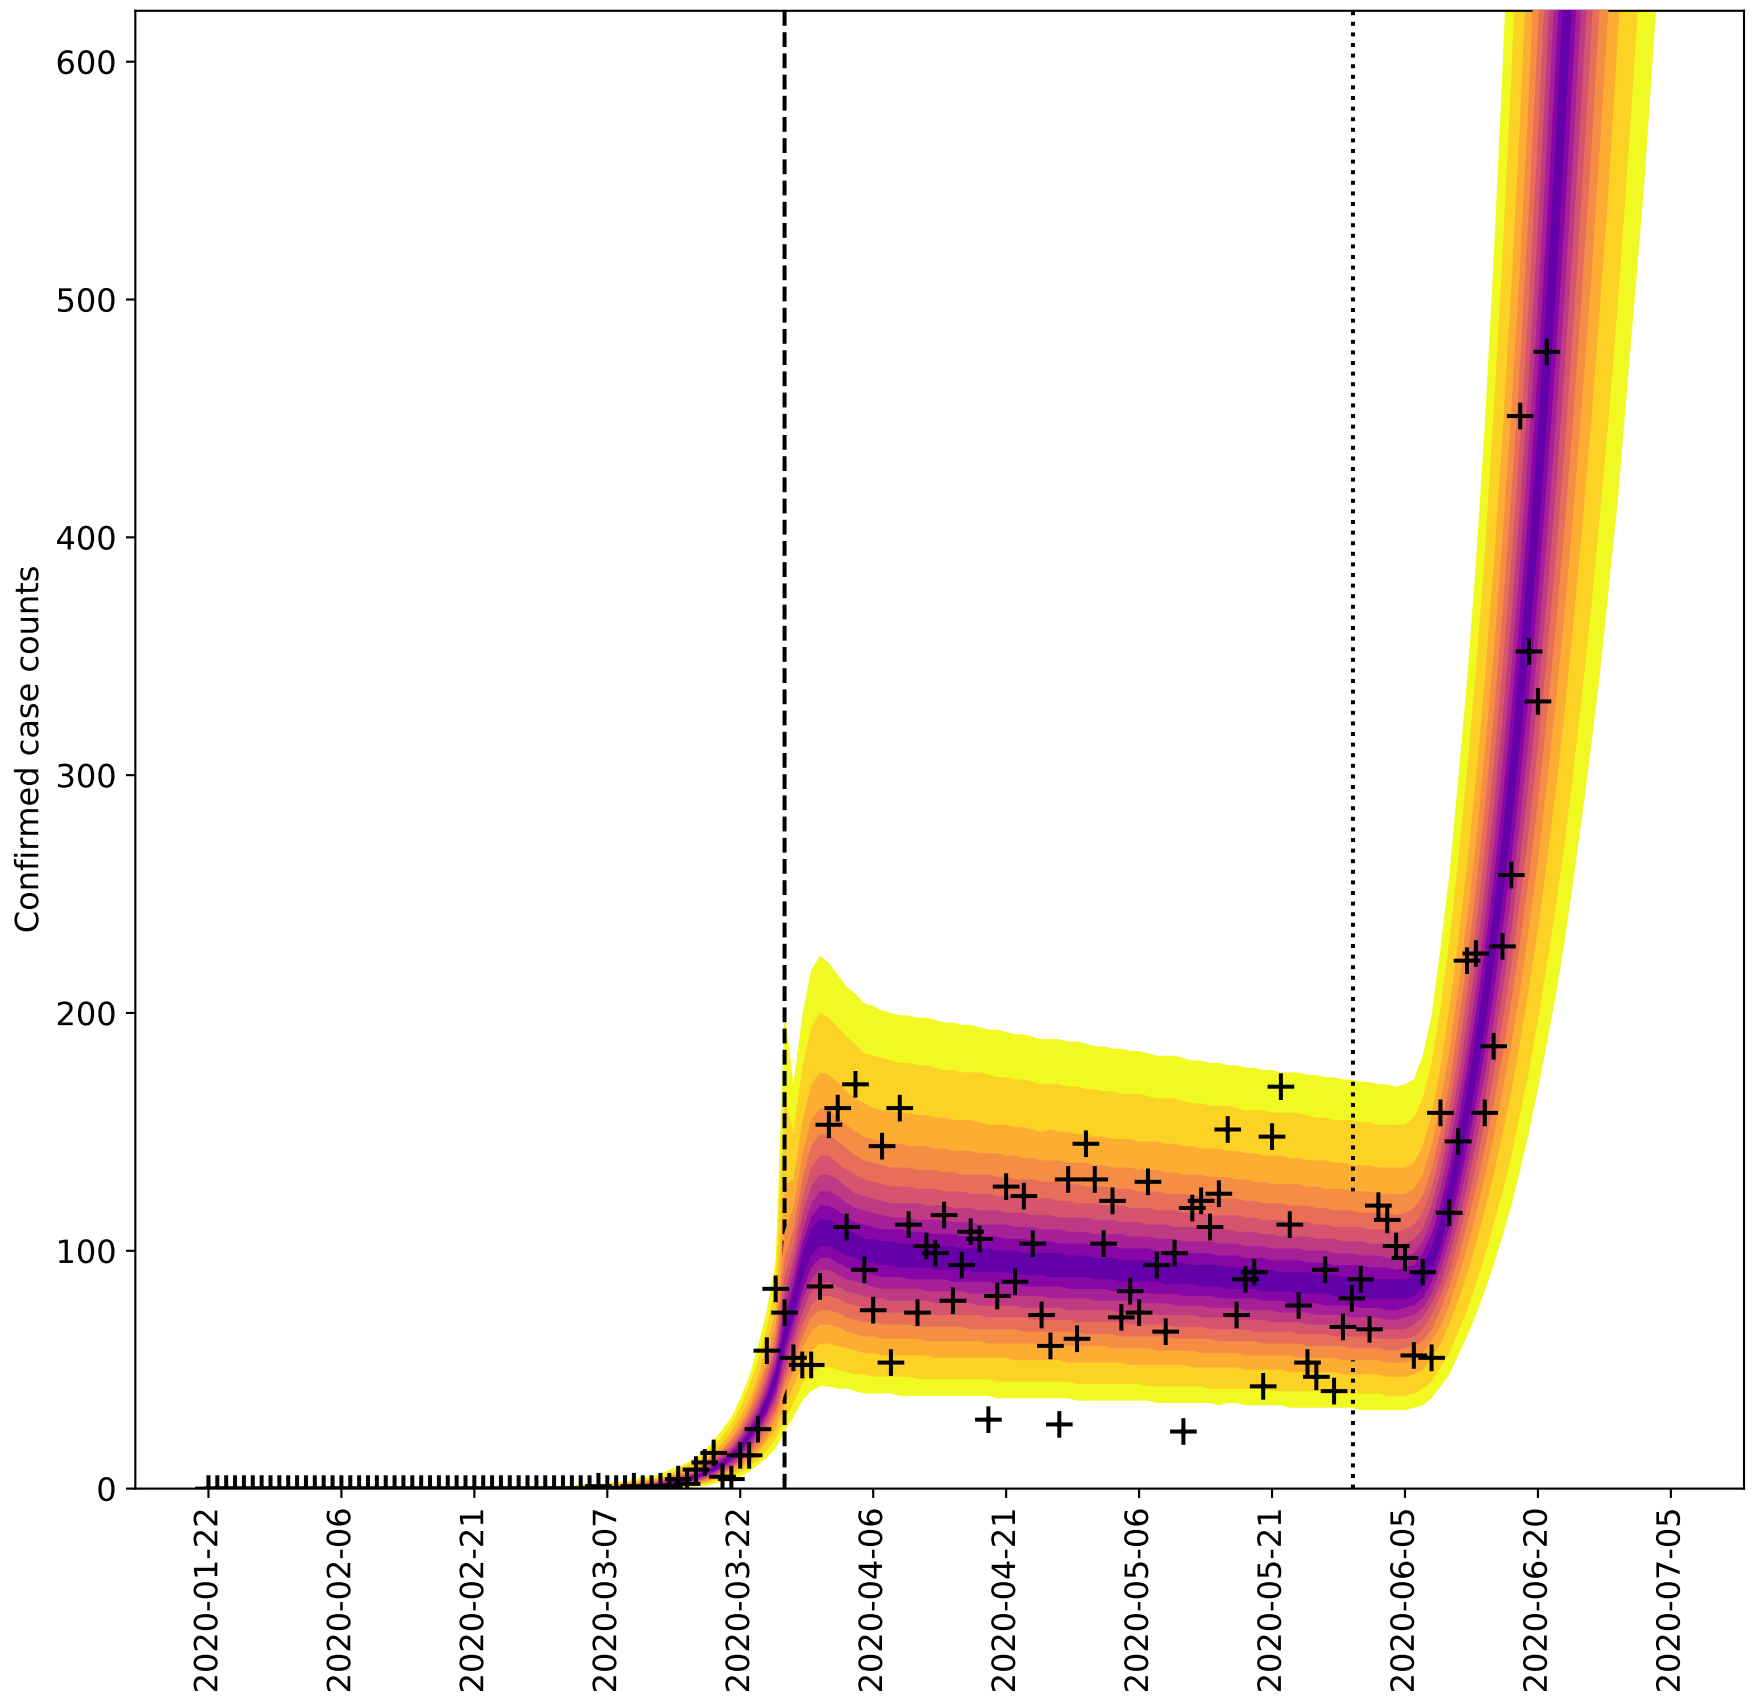

# Oregon

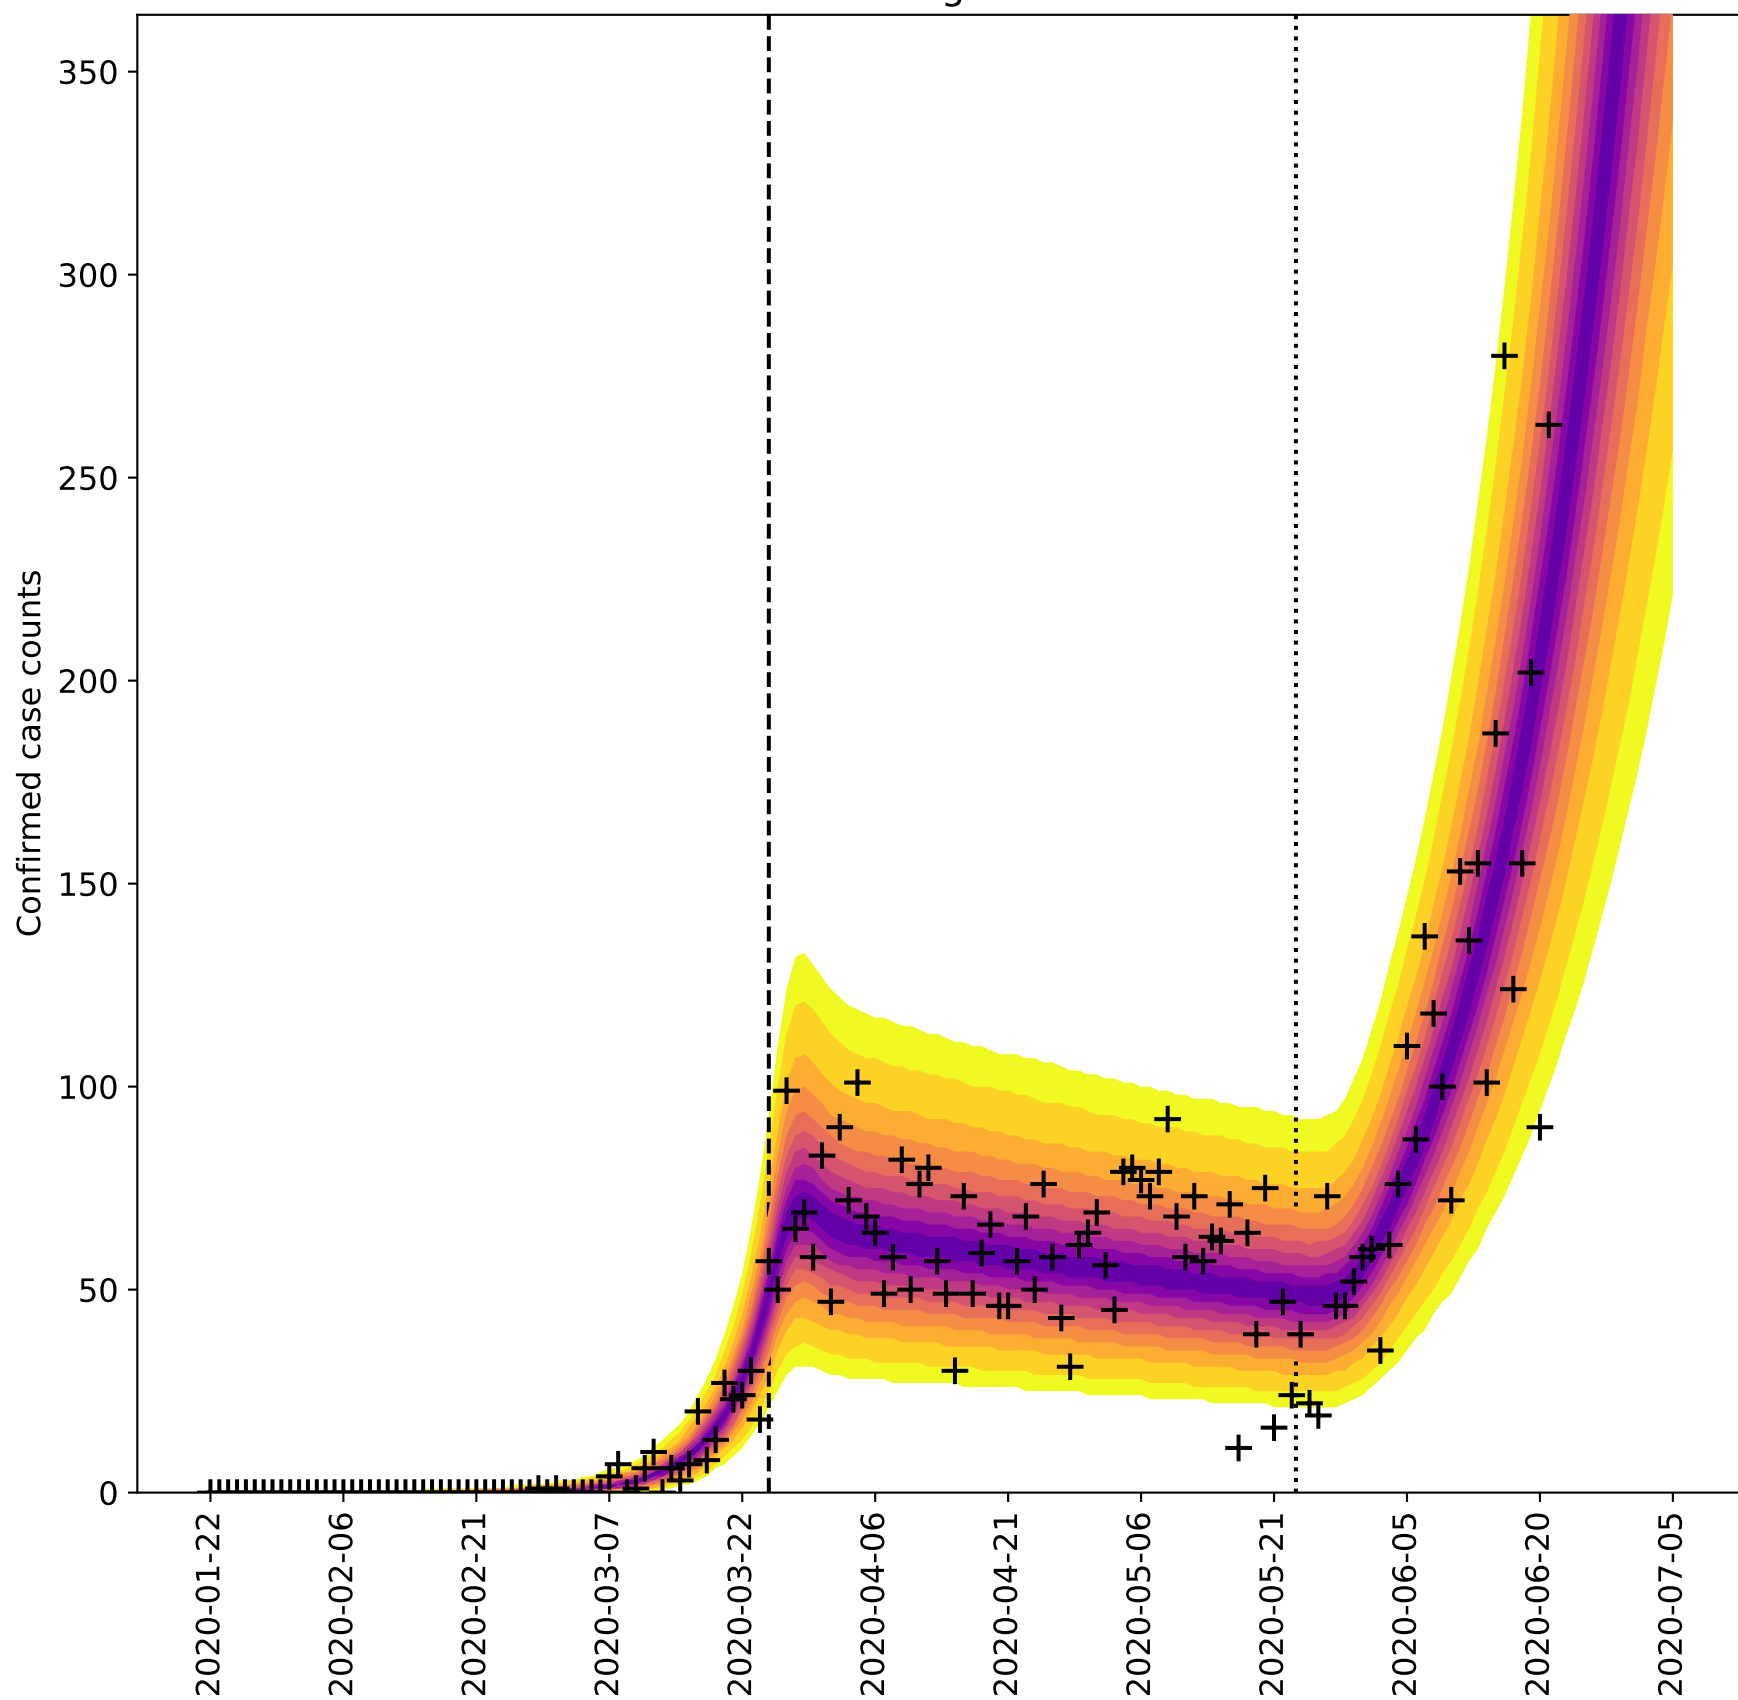

# Pennsylvania

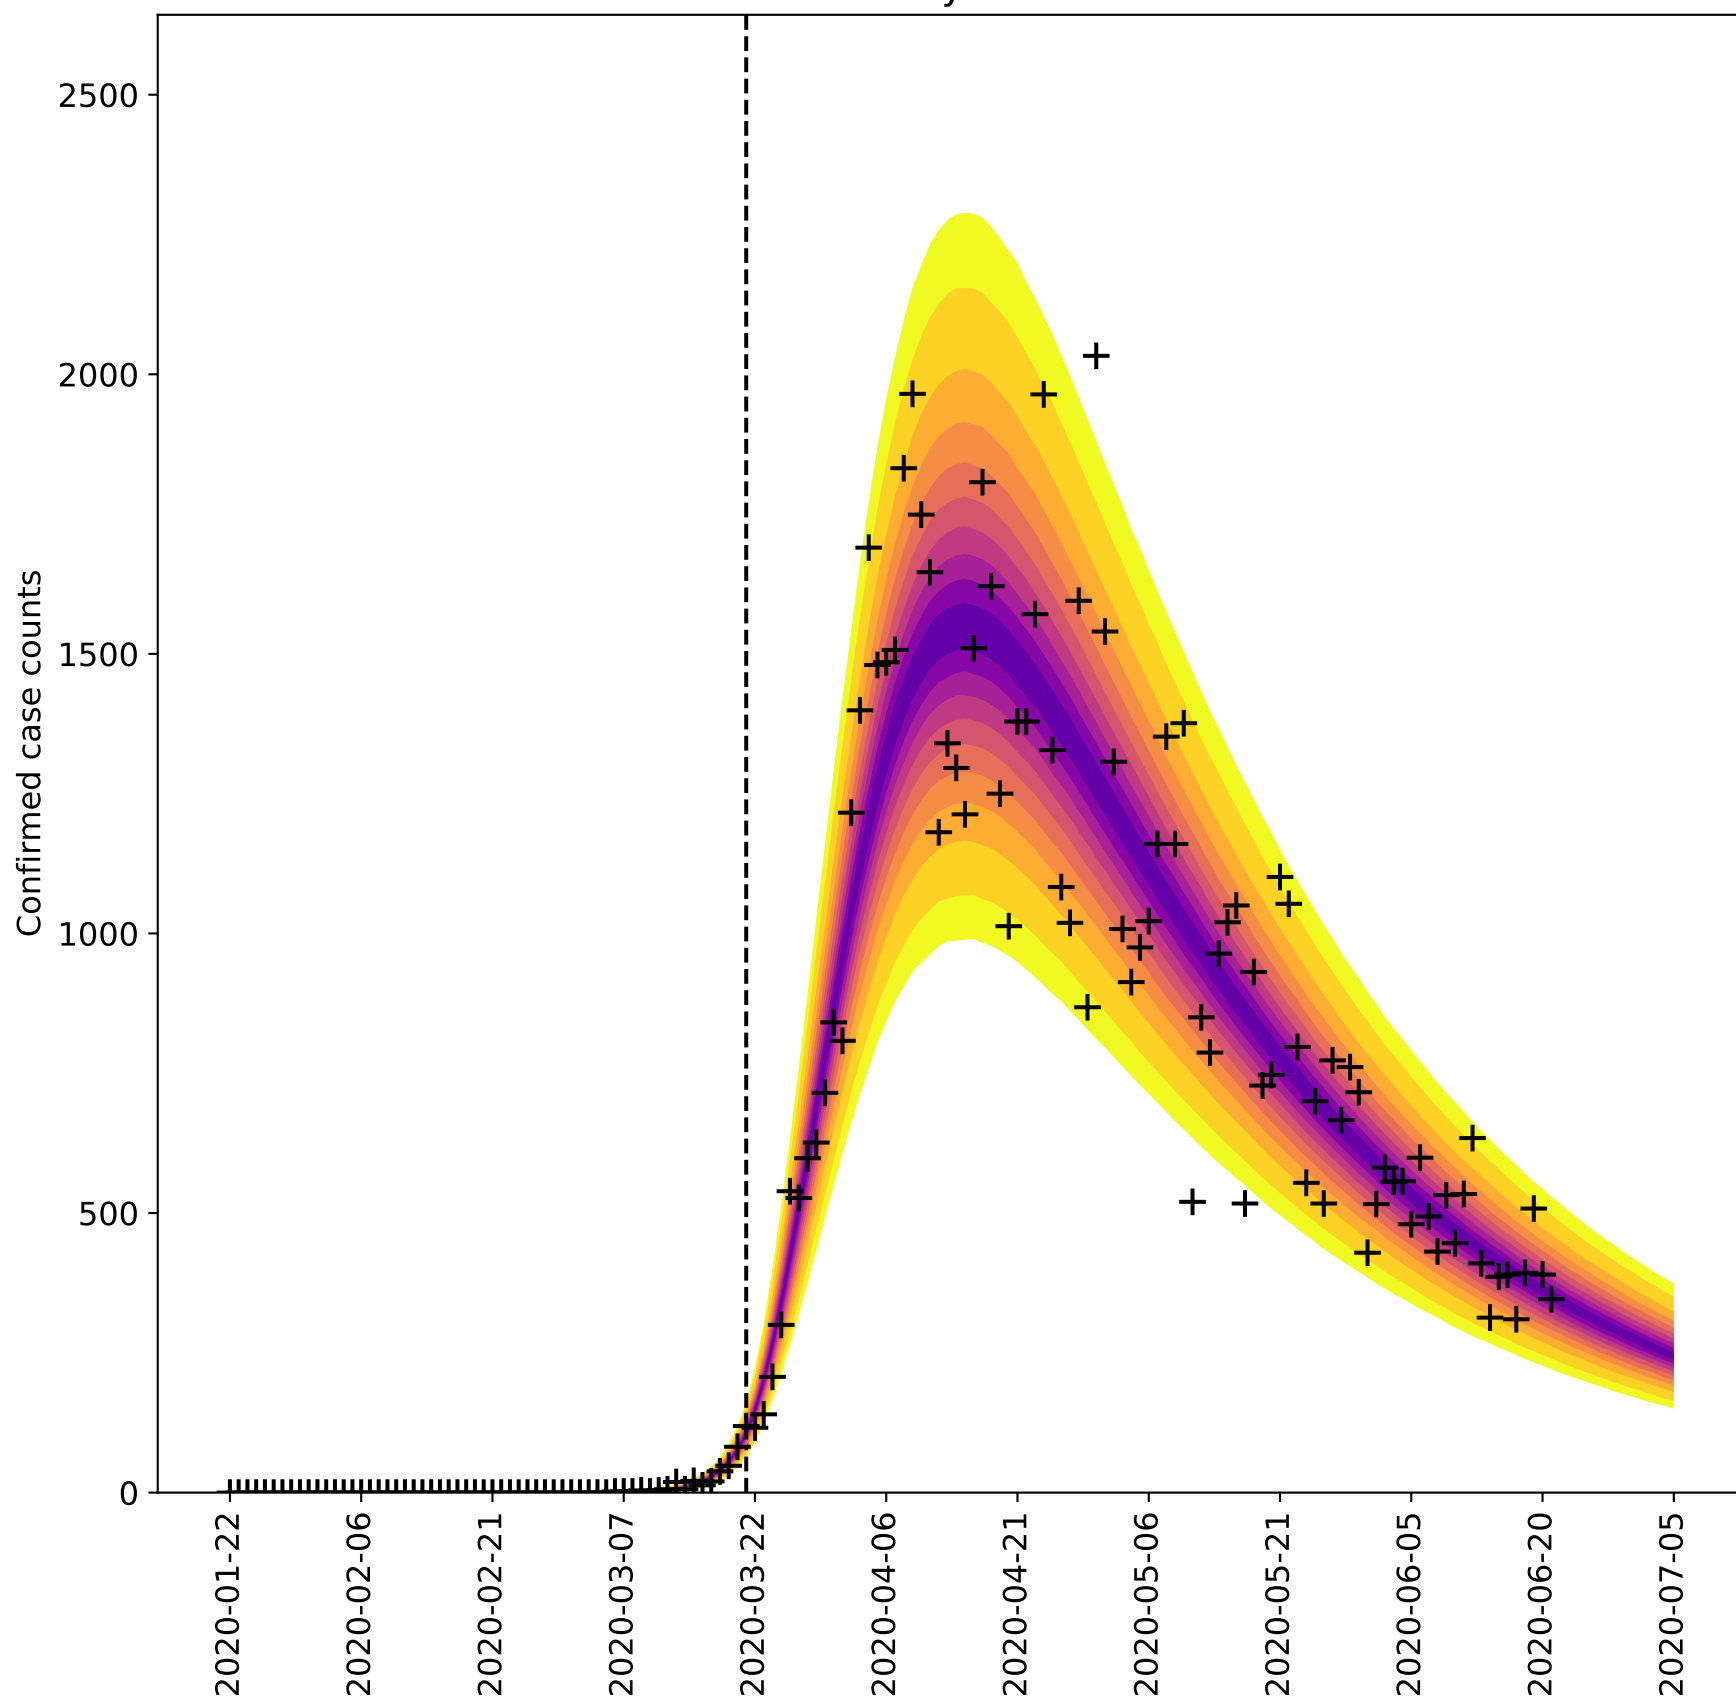

# Rhode Island

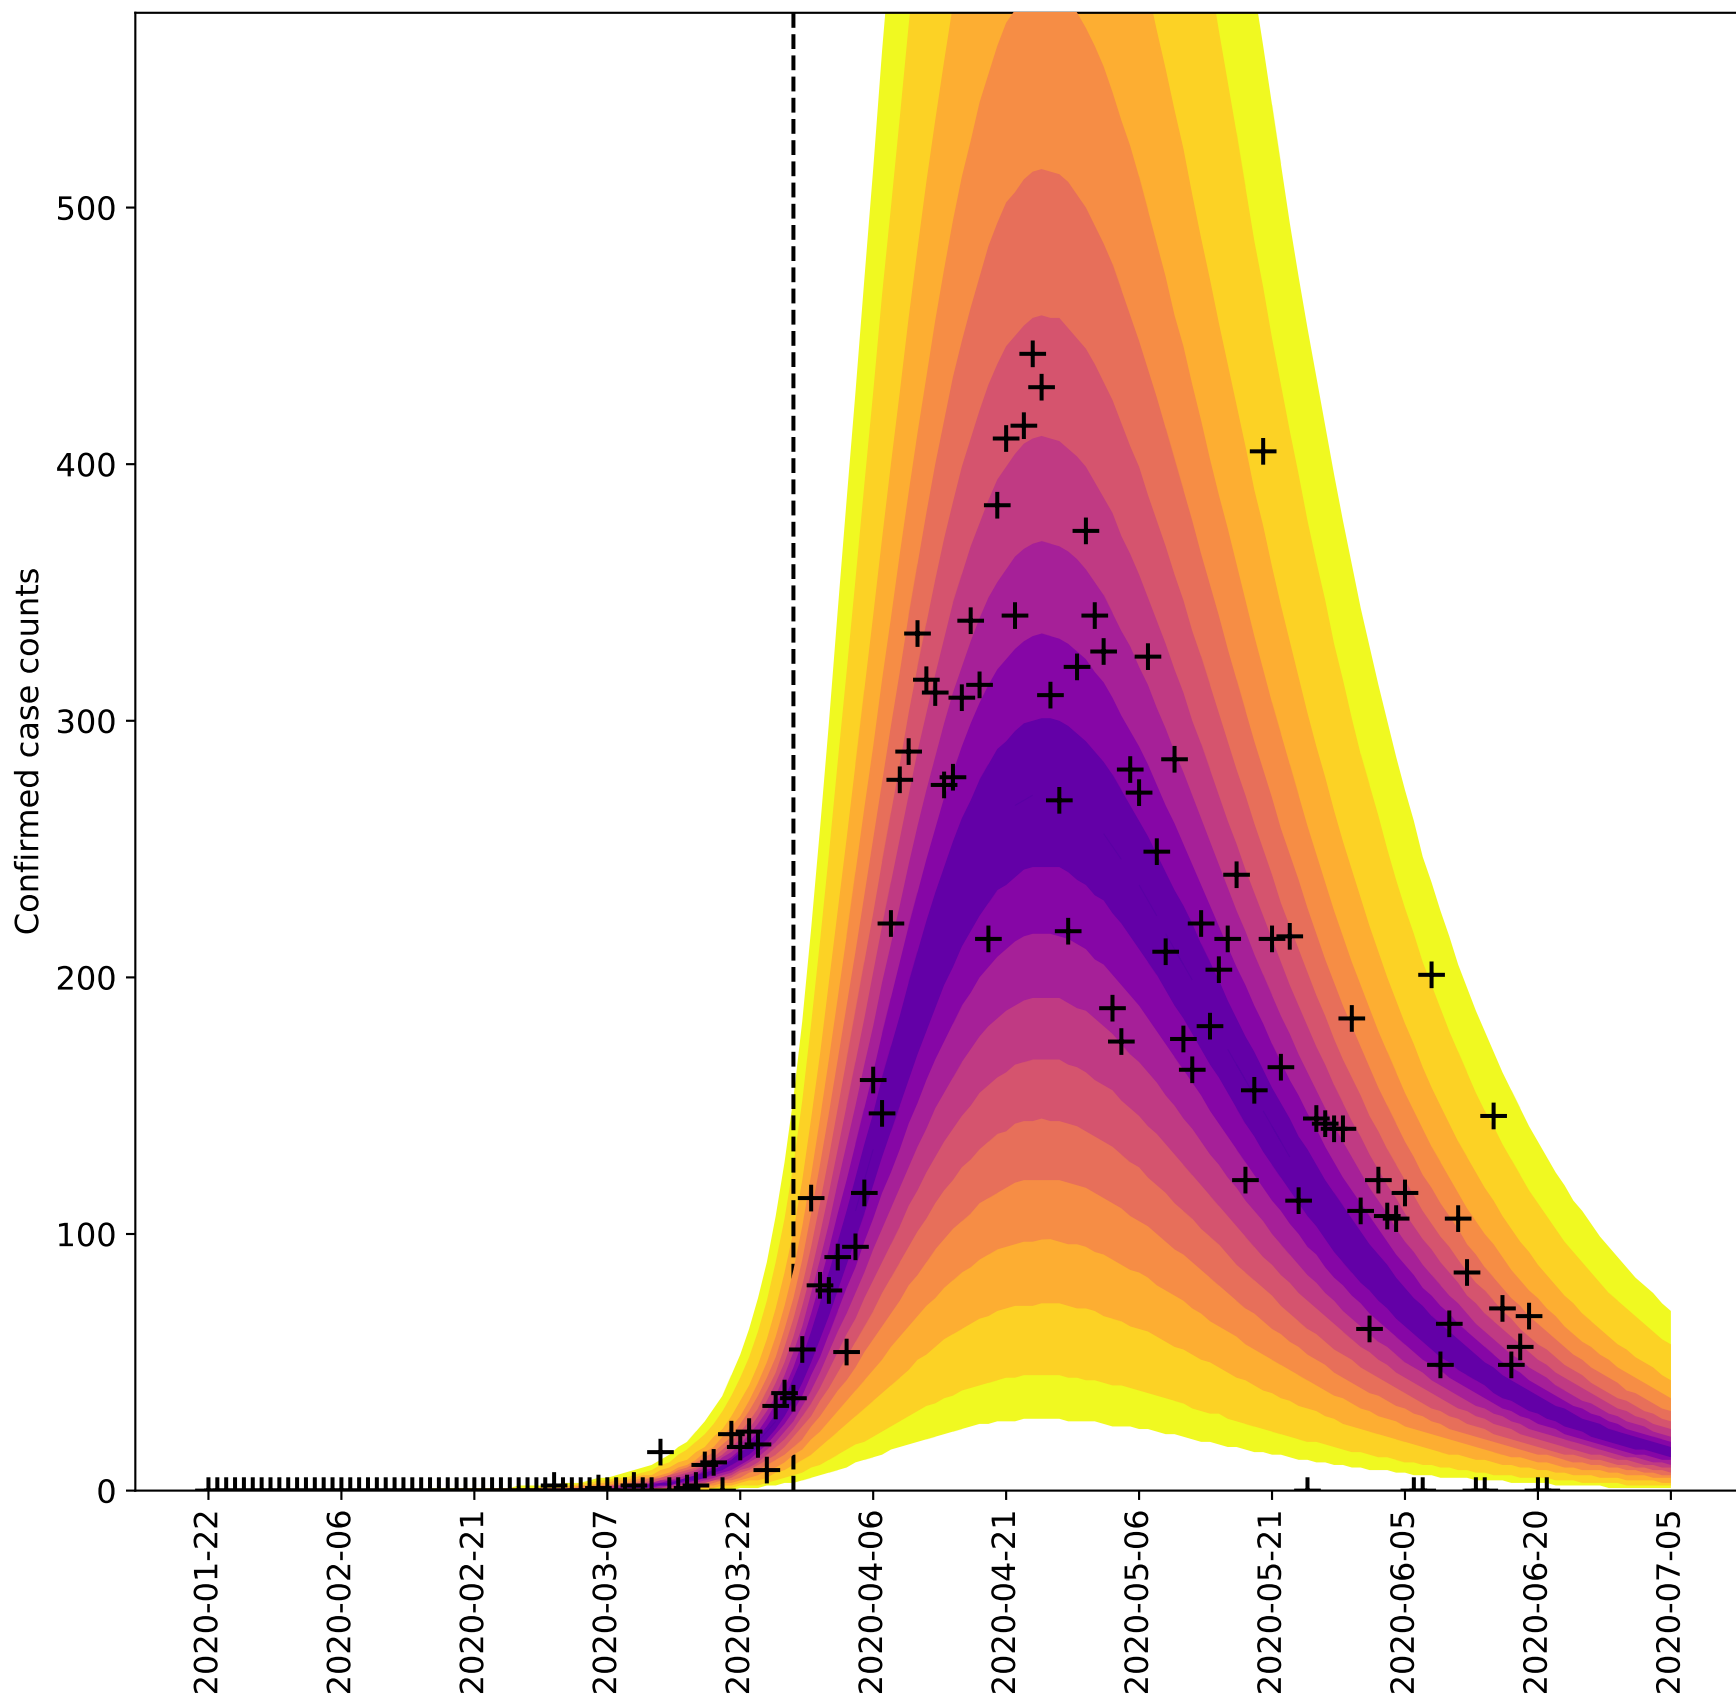

# South Carolina

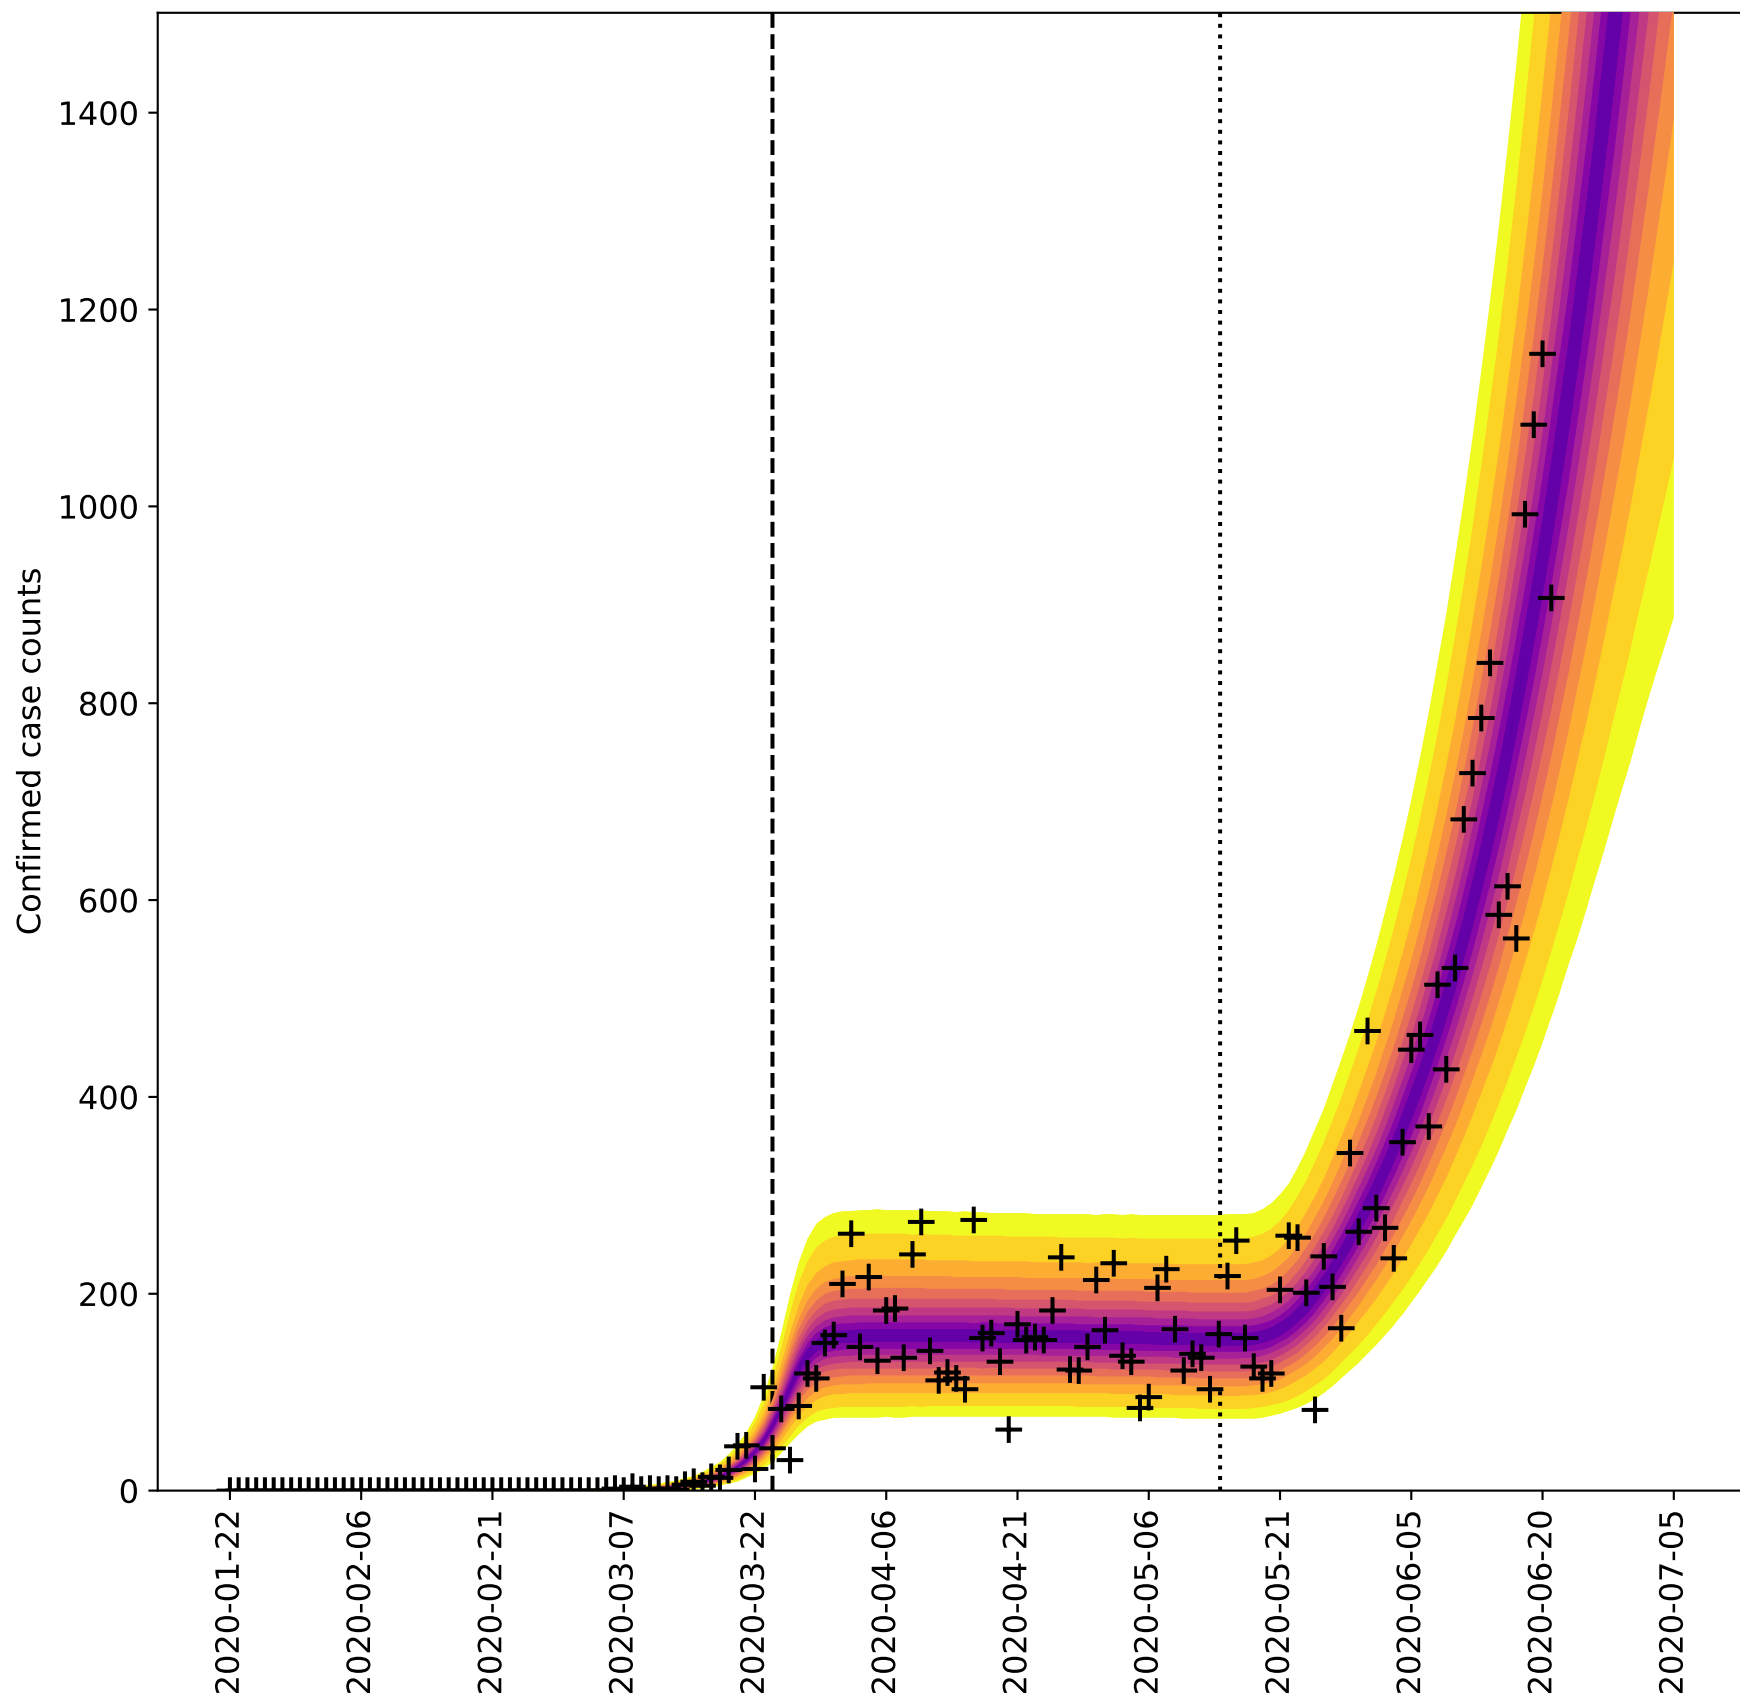

# South Dakota

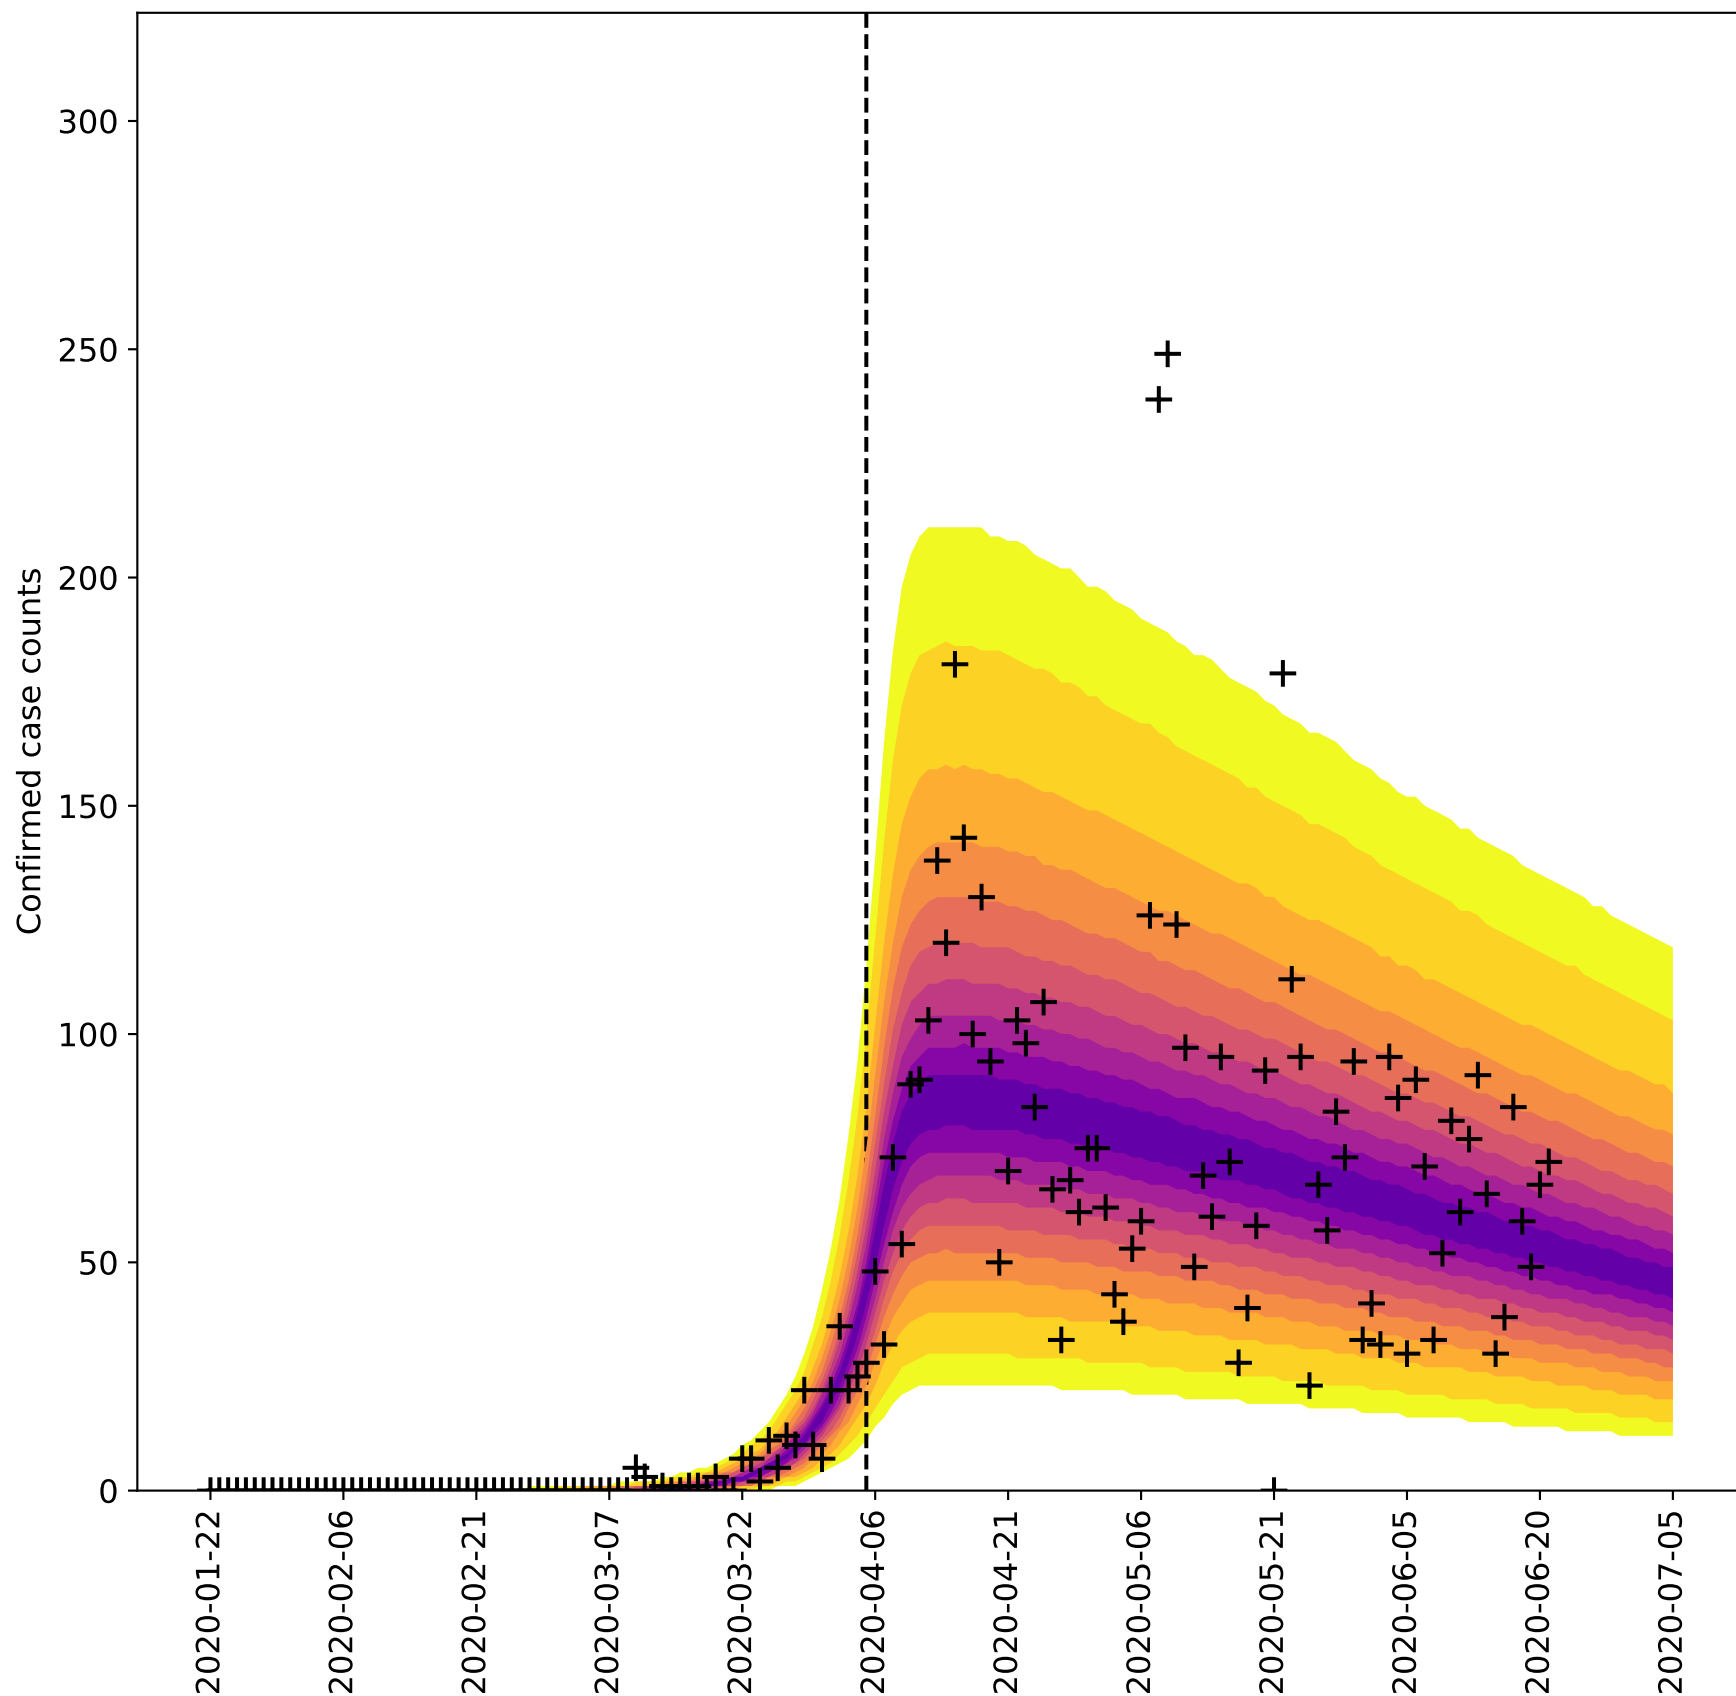

# Tennessee

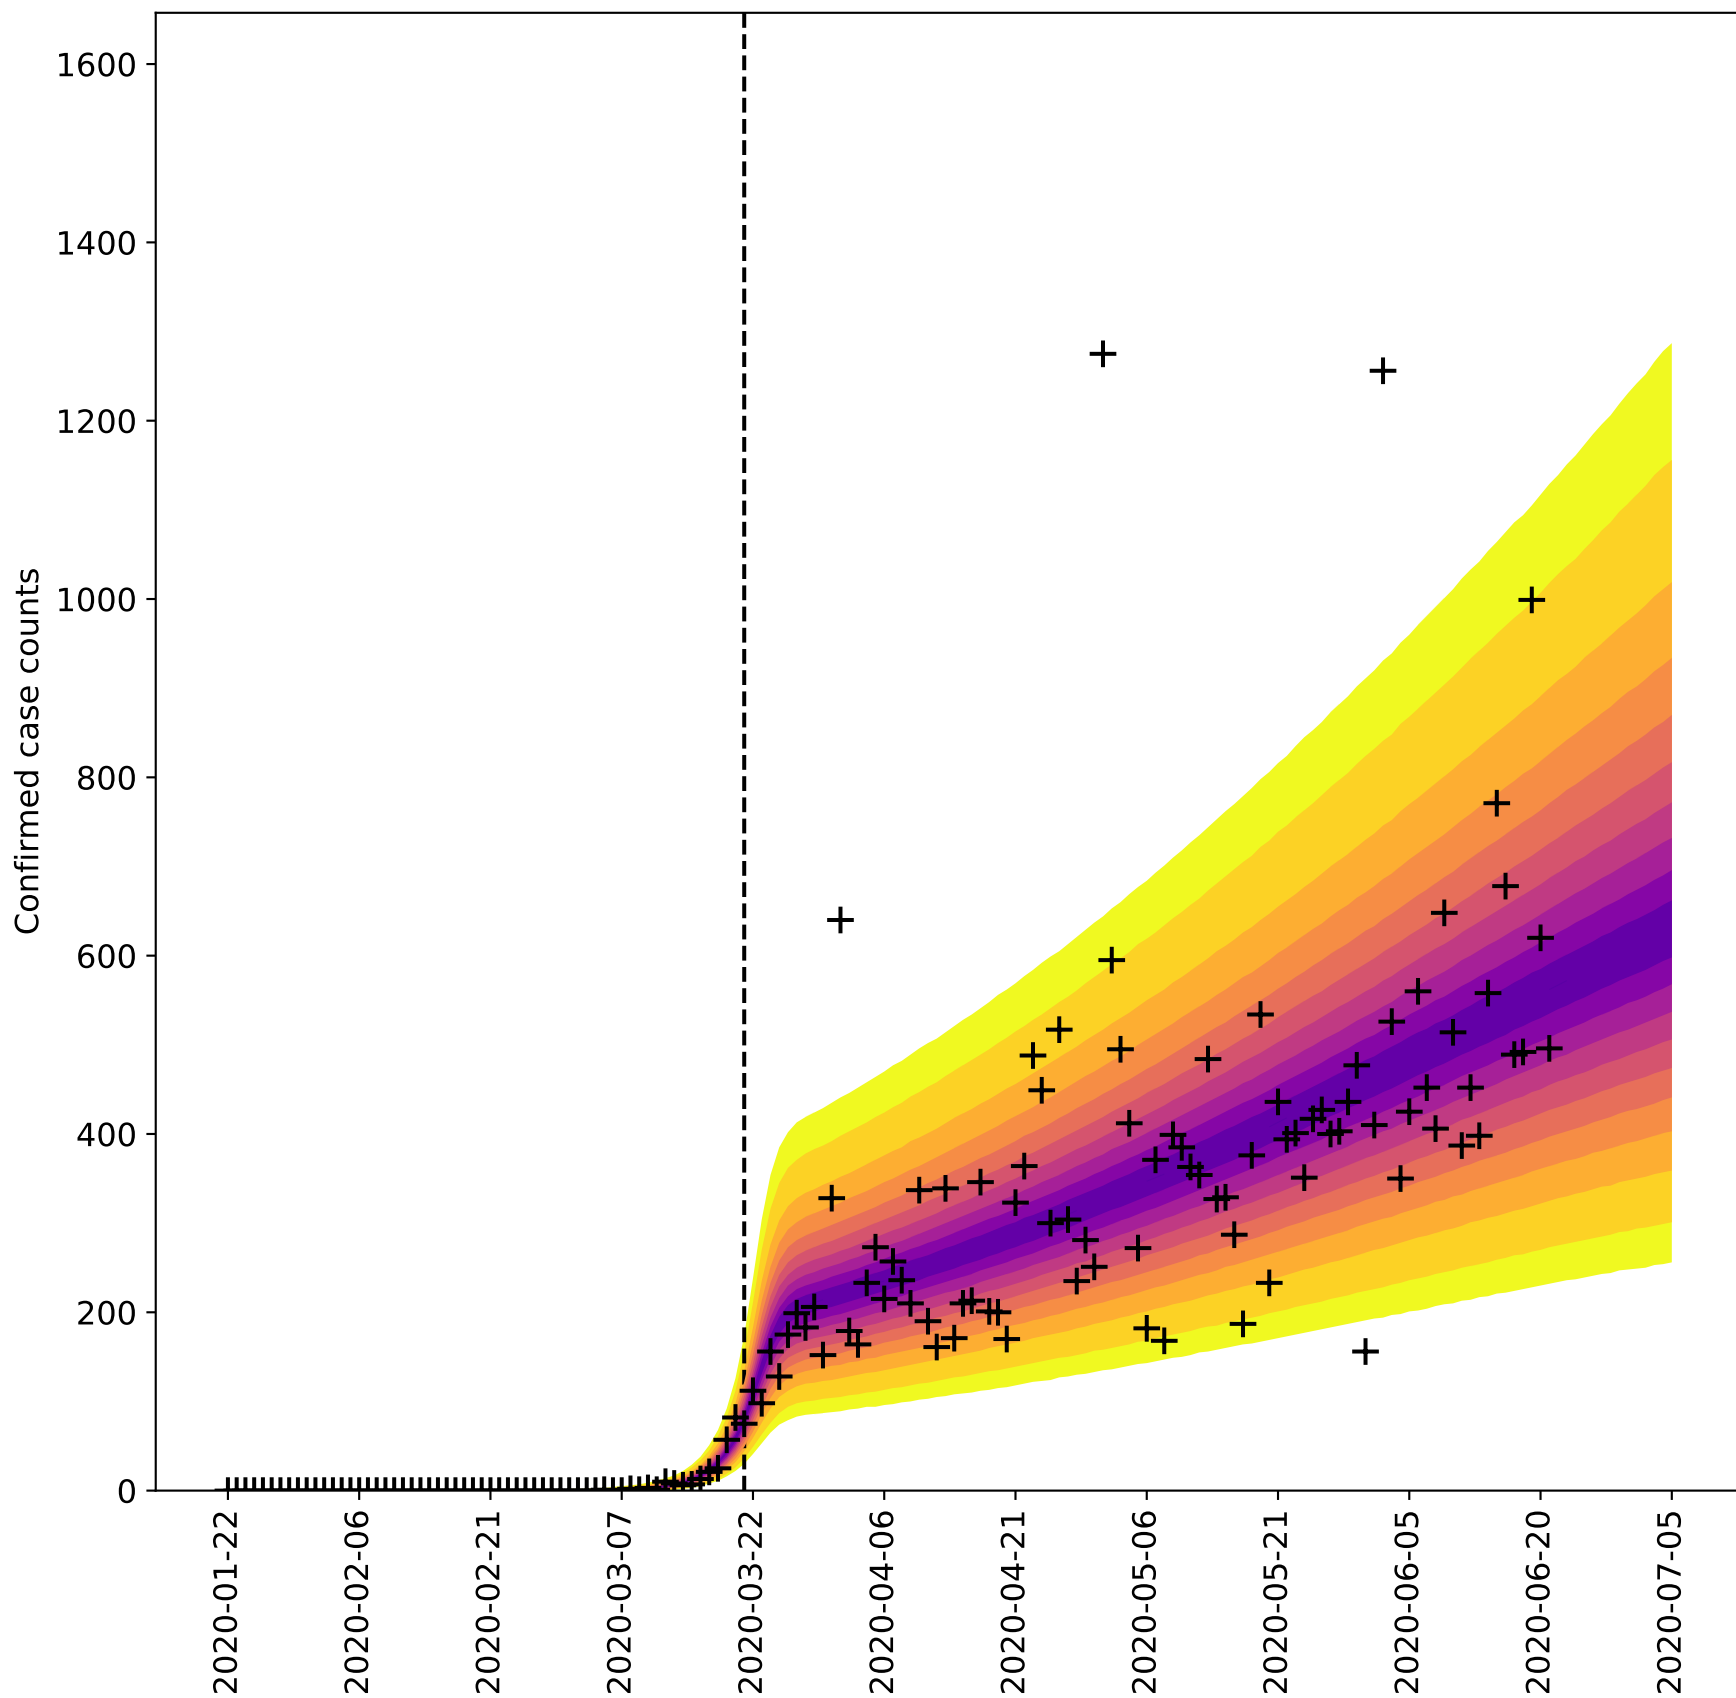



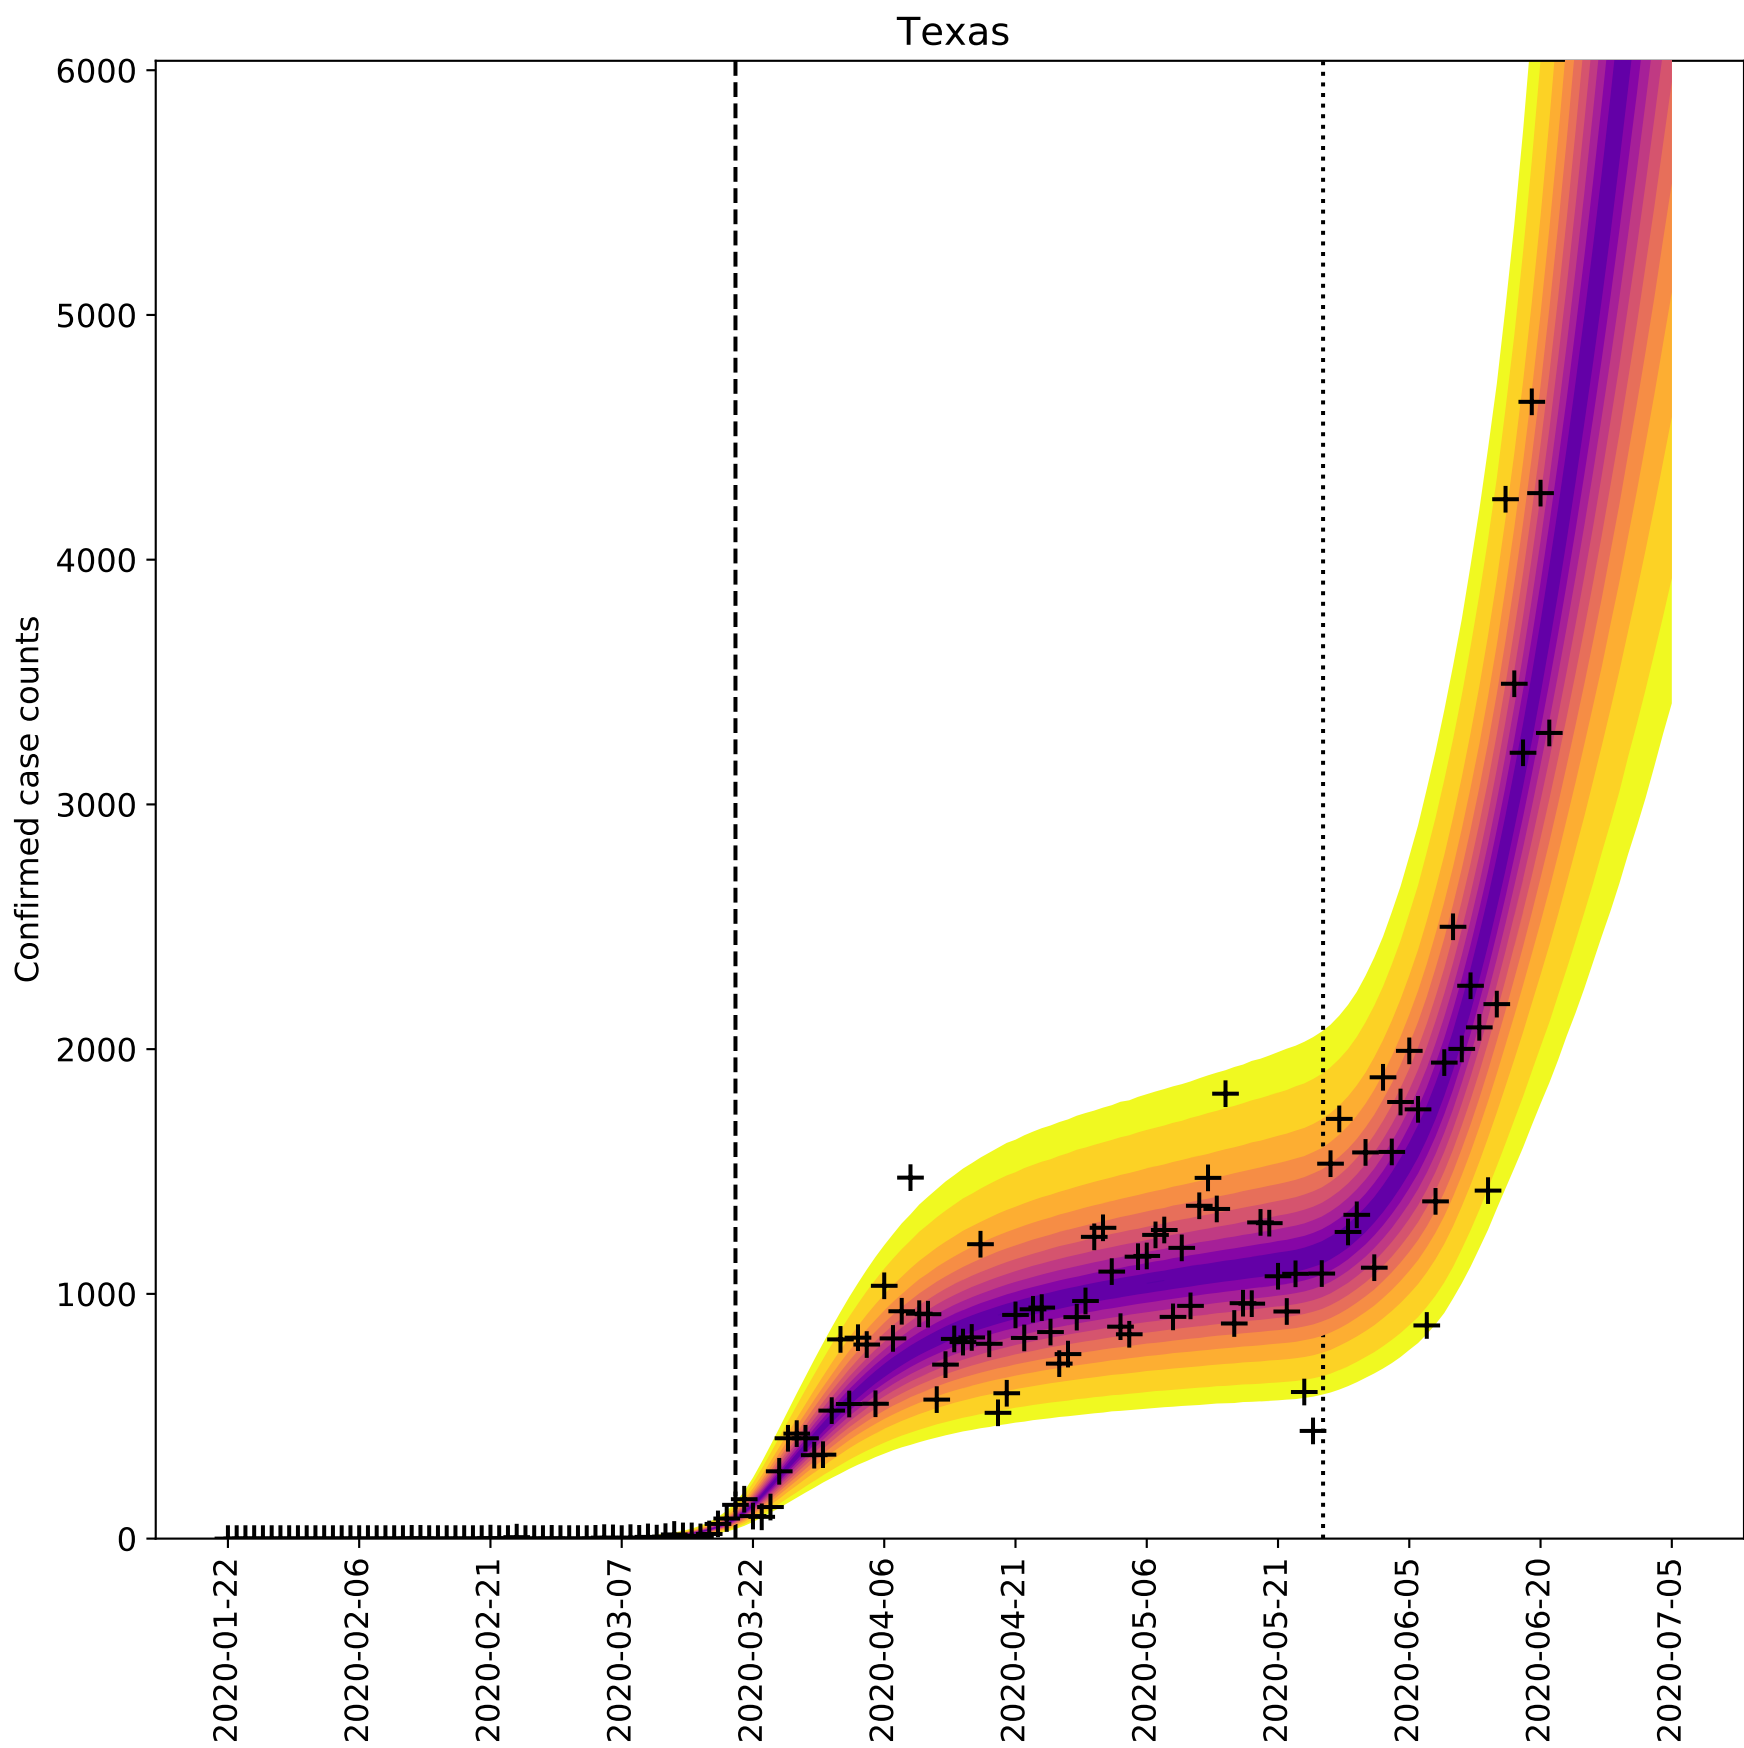

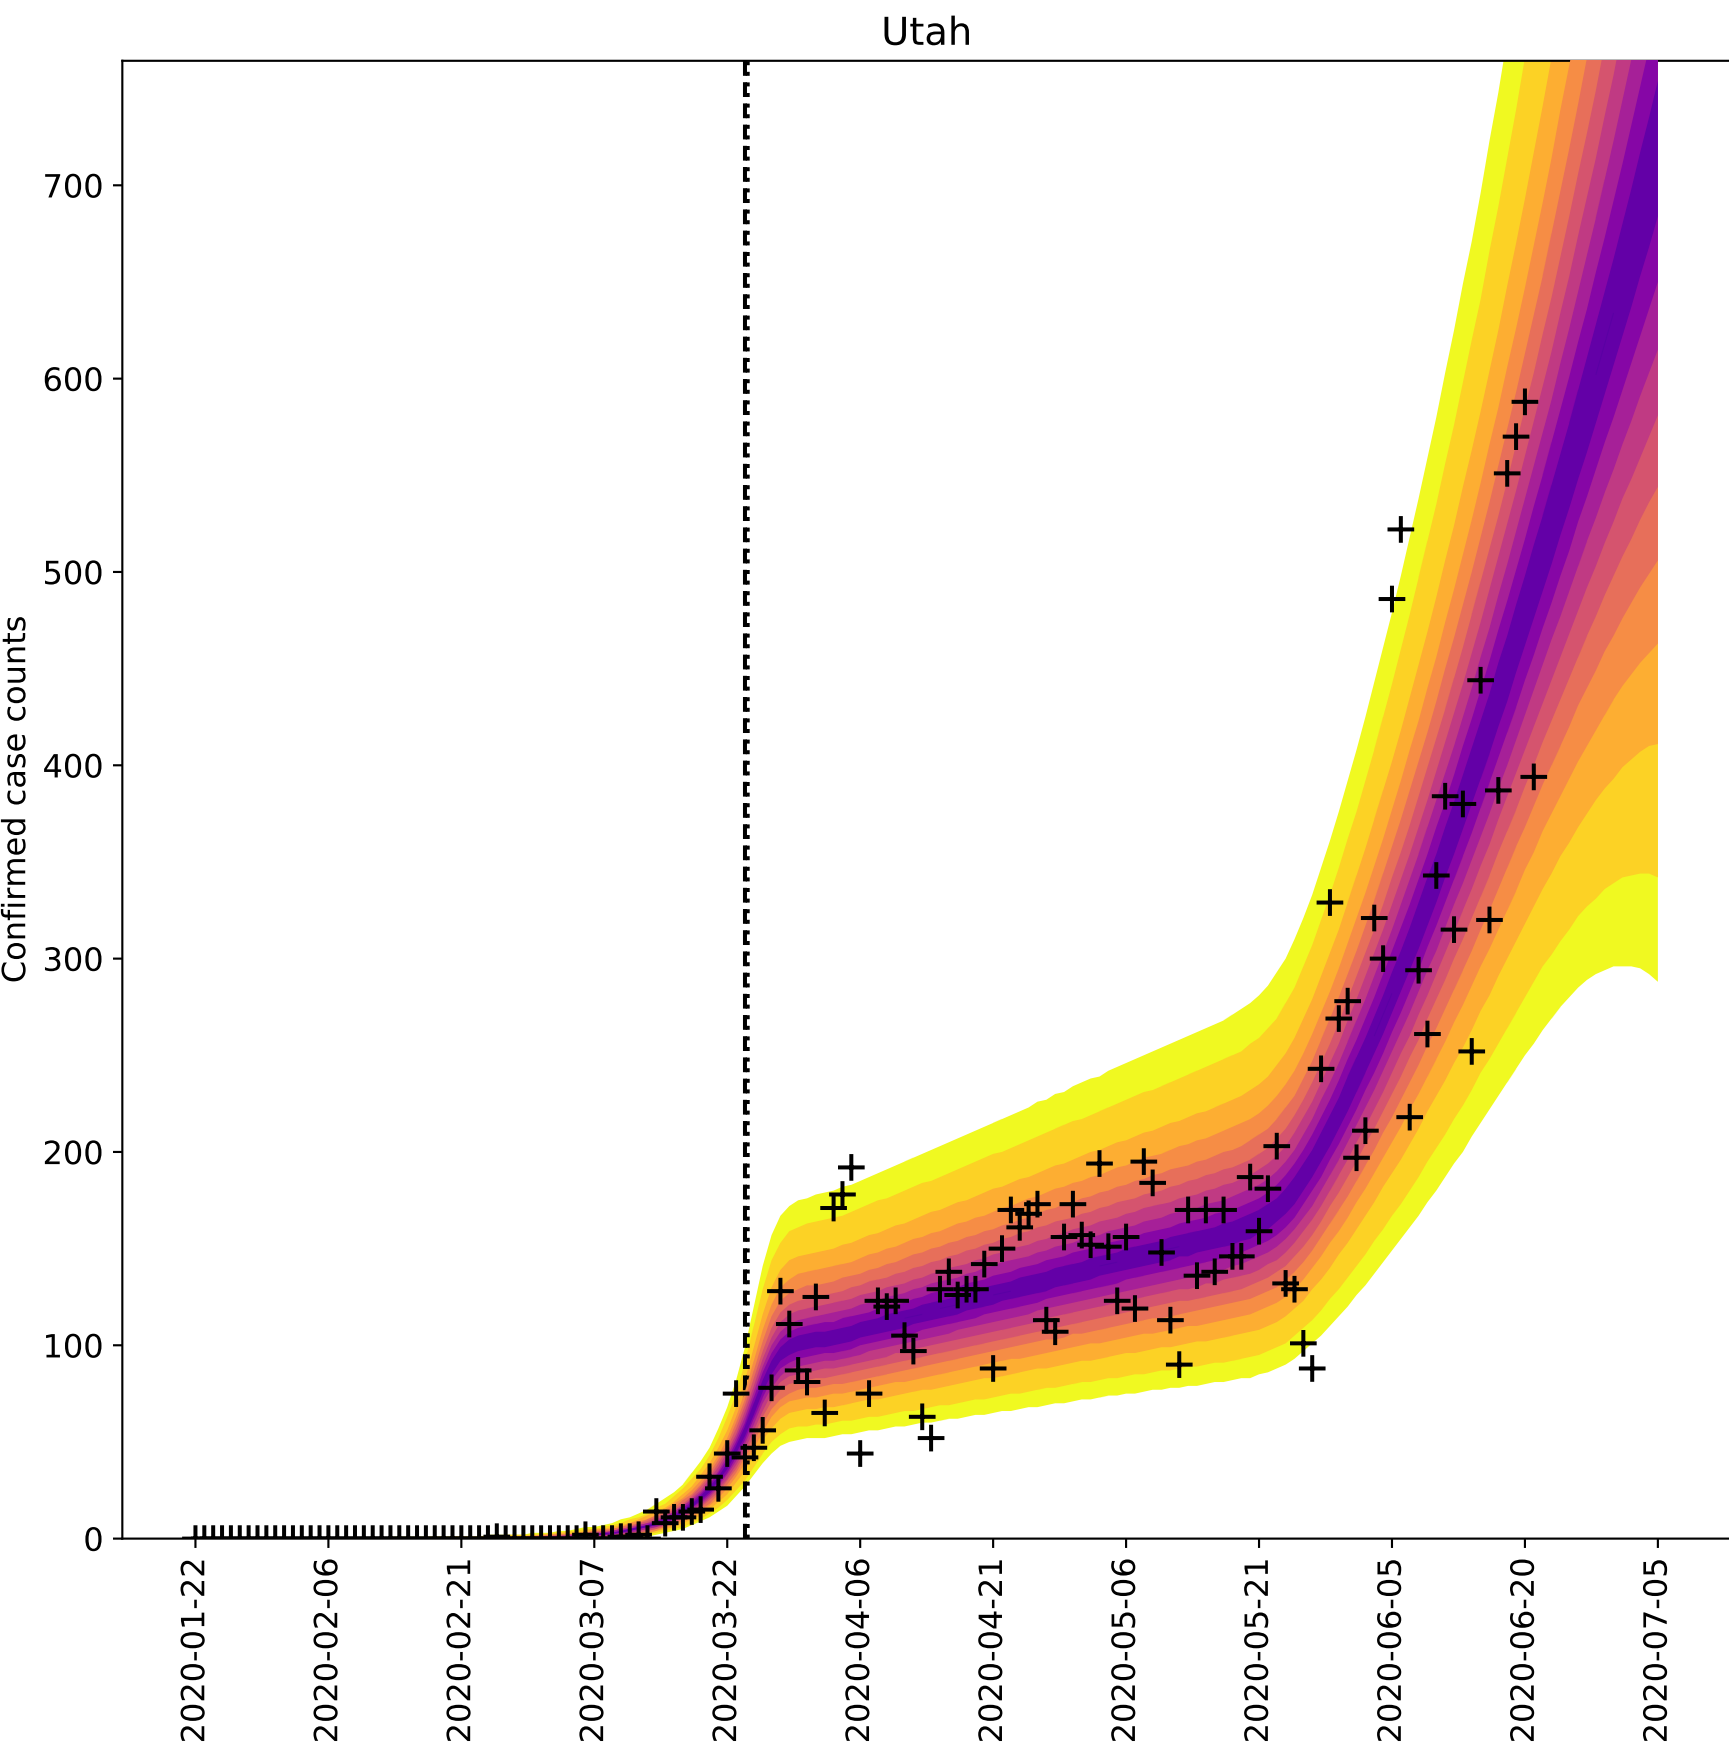

# Vermont

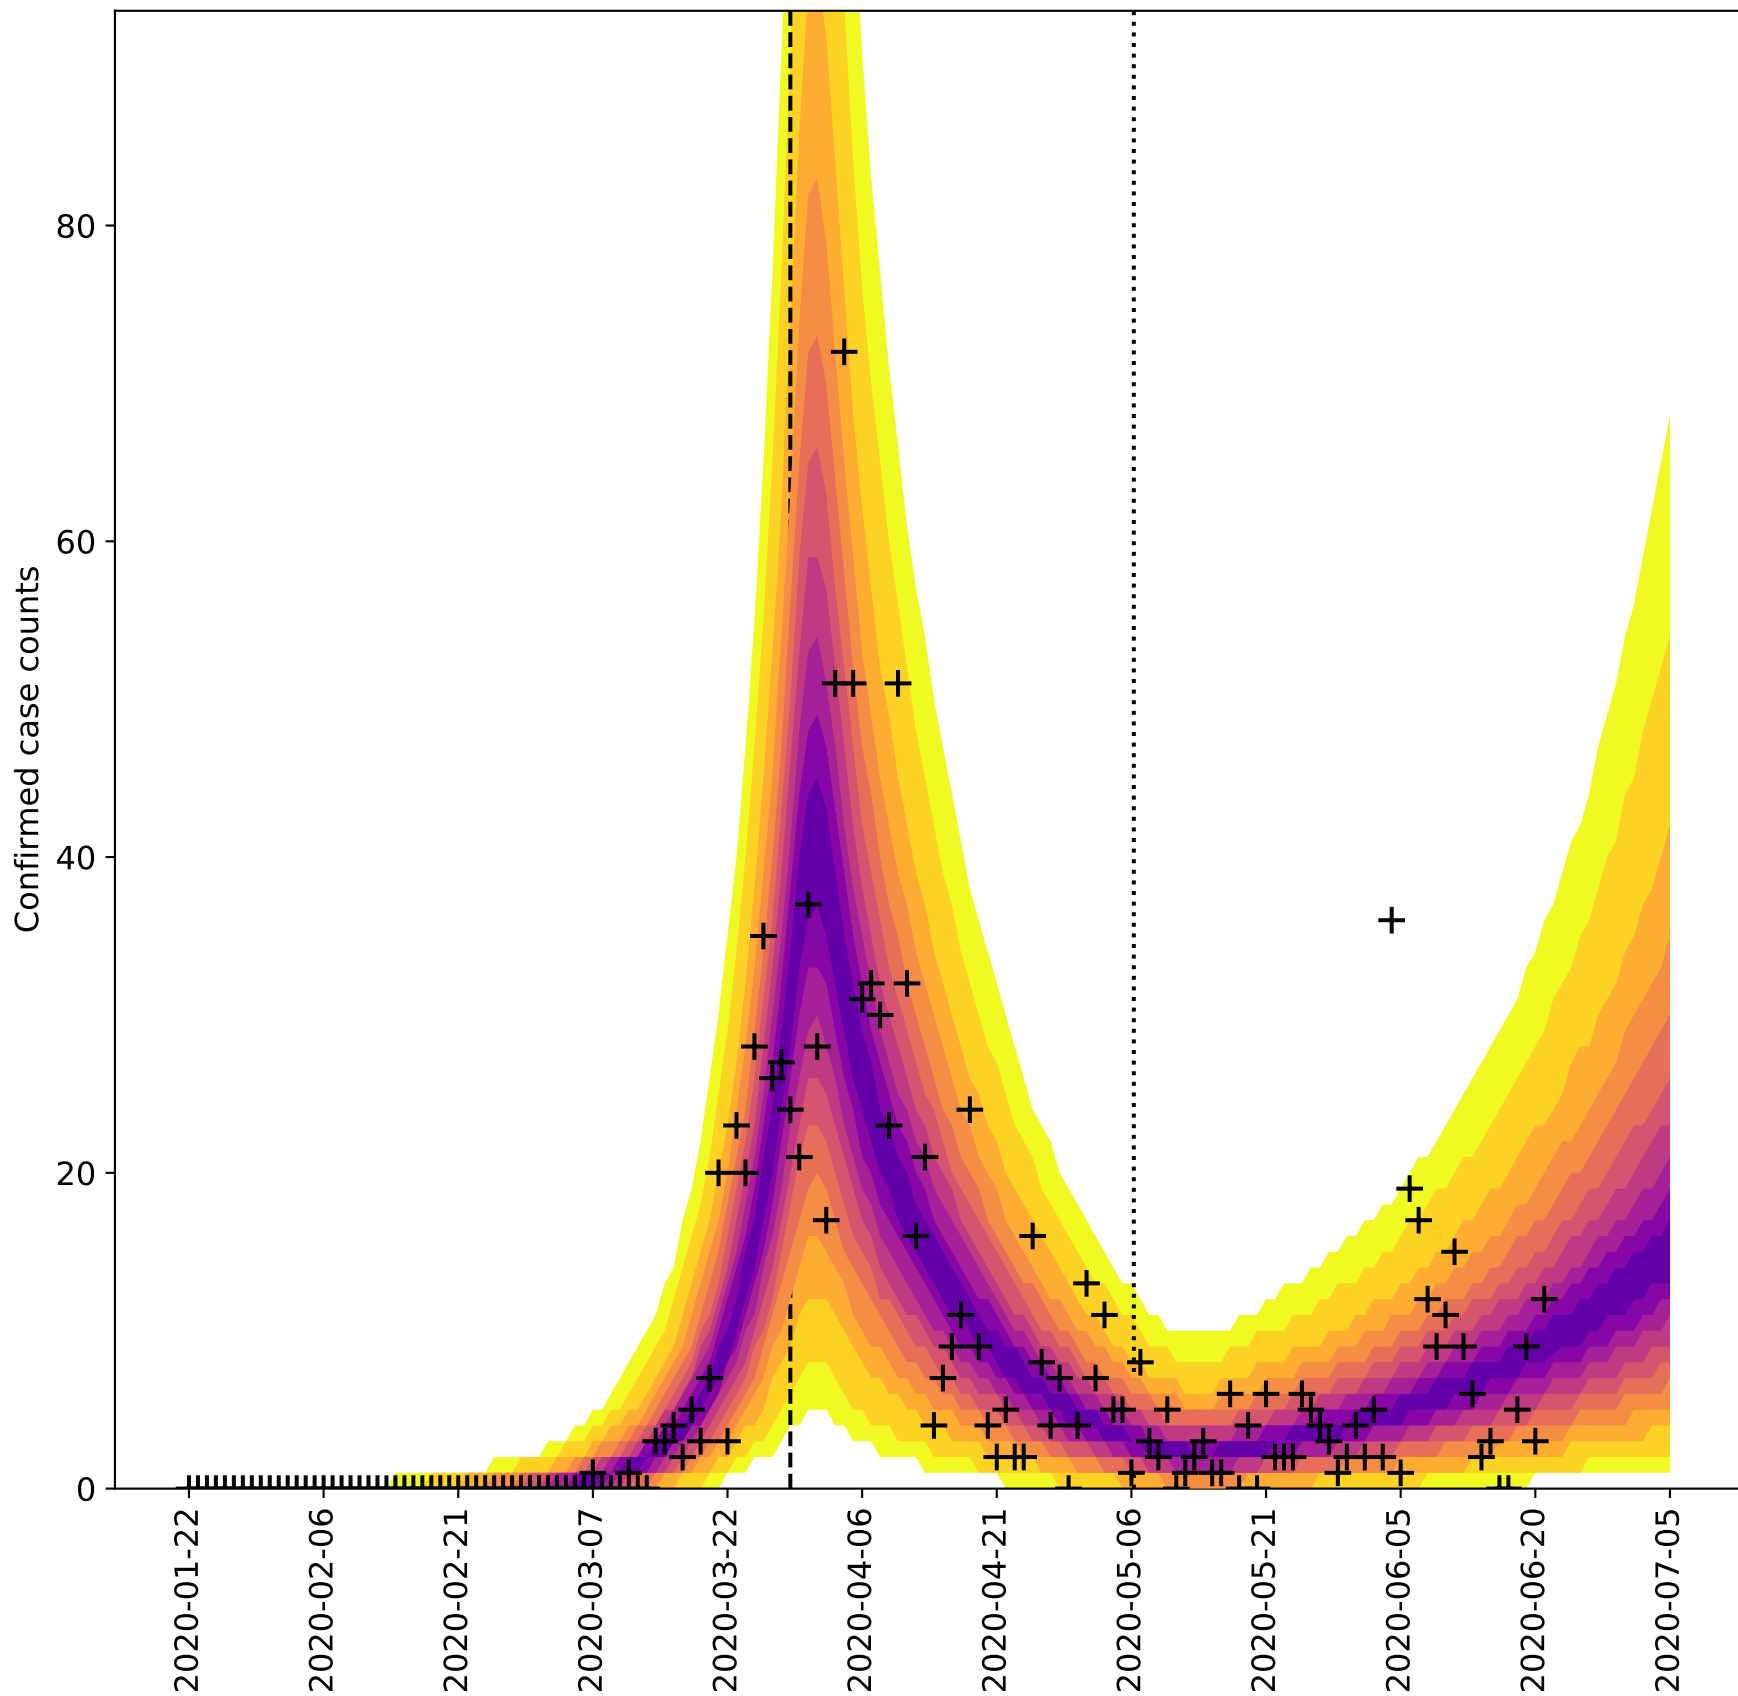

# Virginia

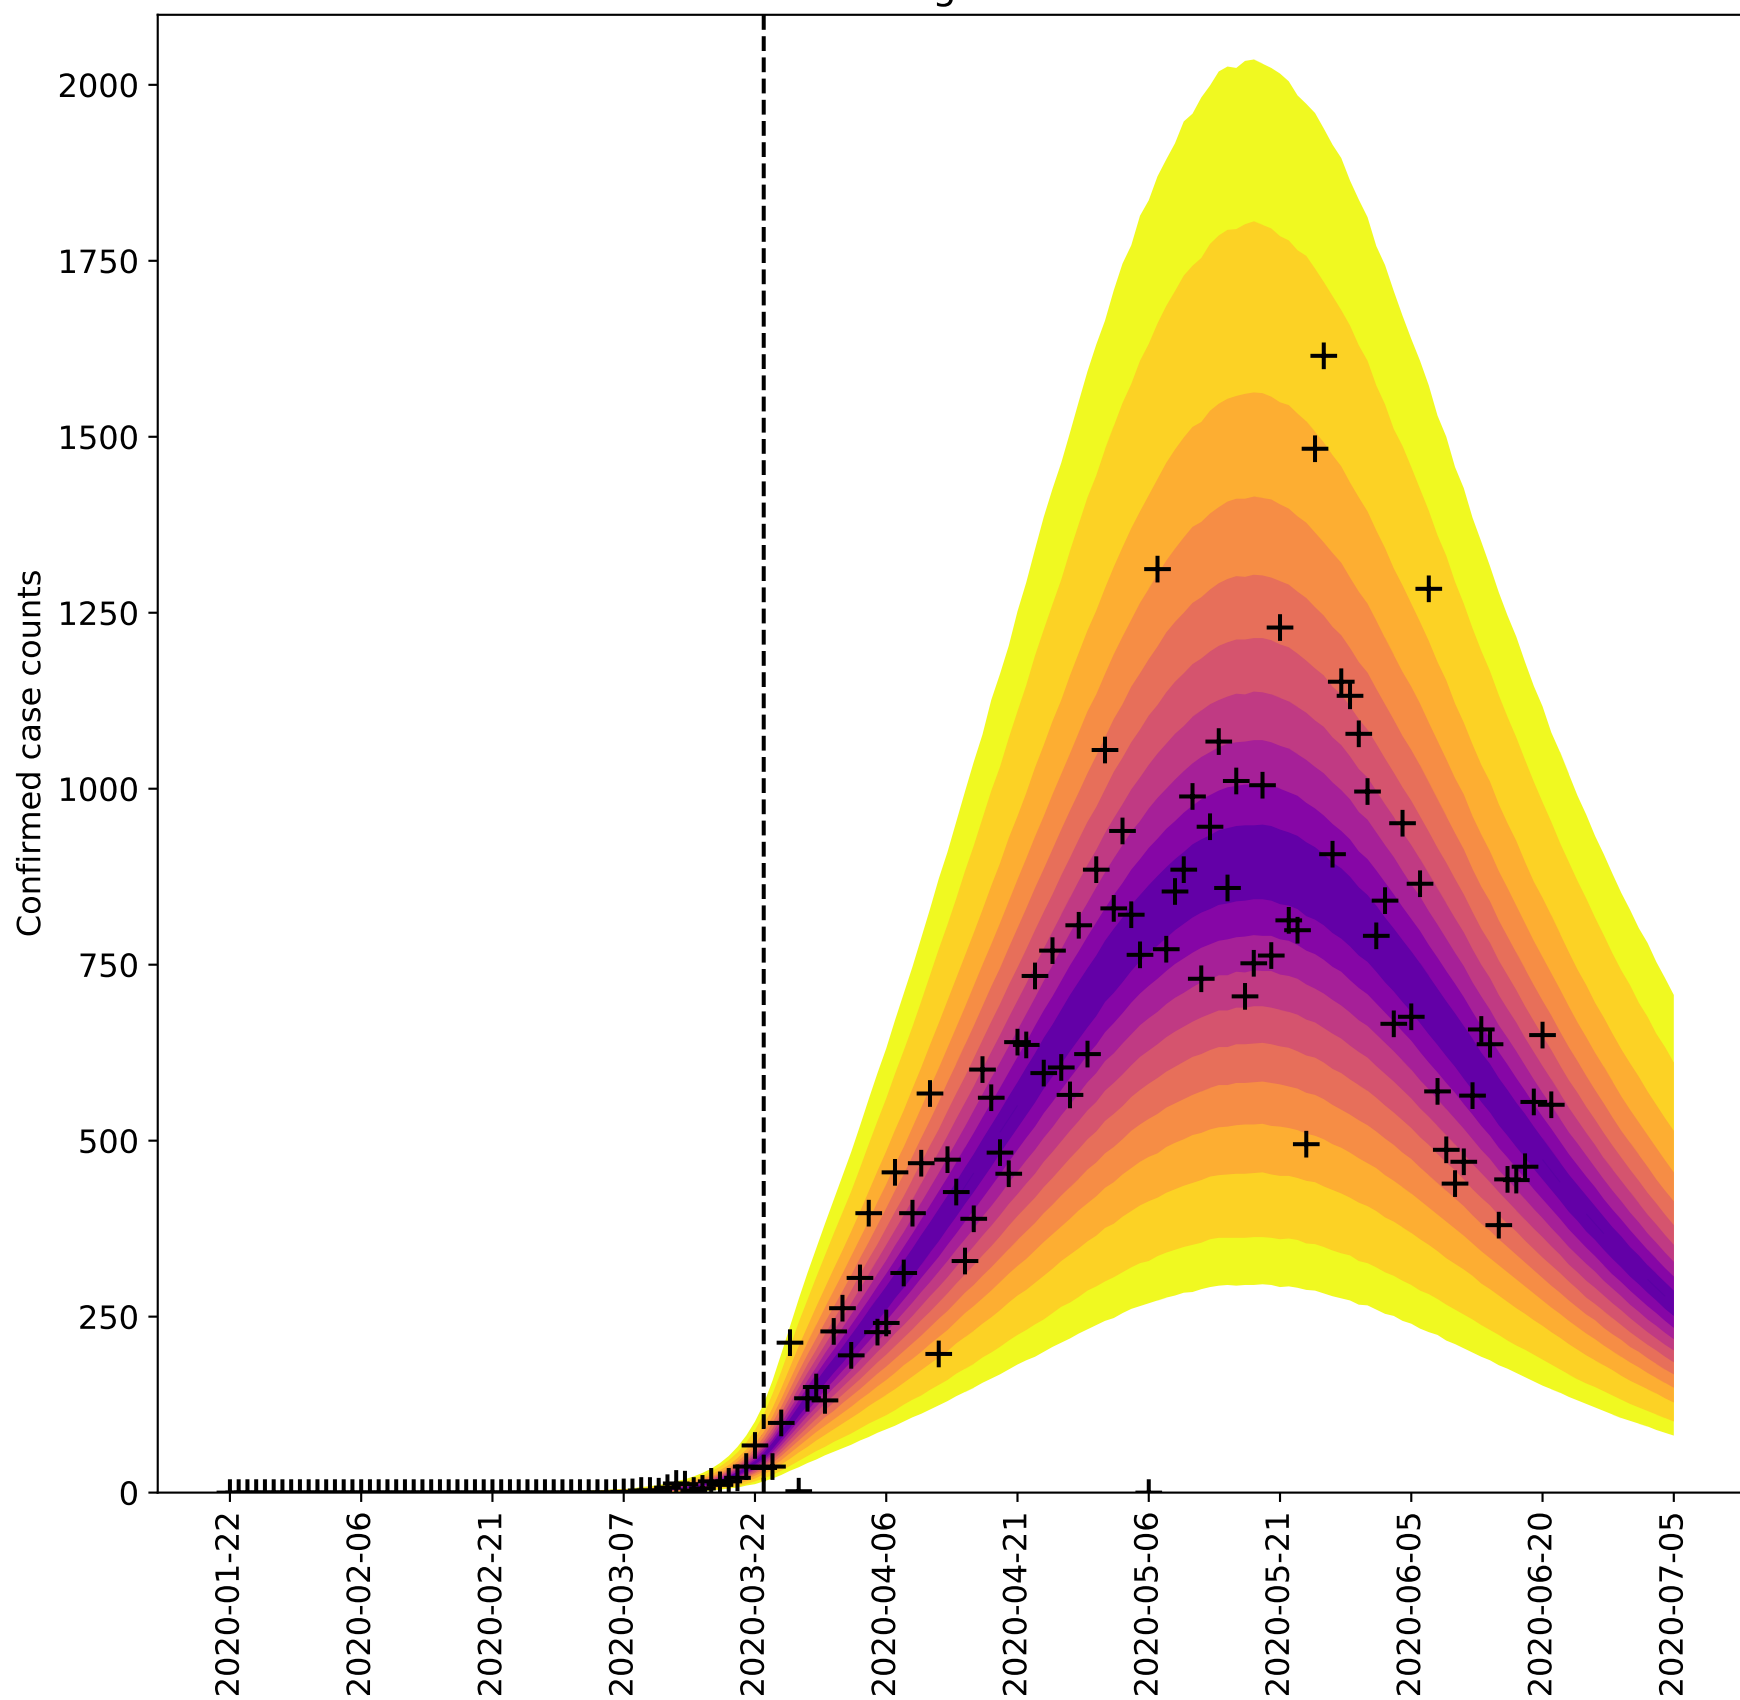

# Washington

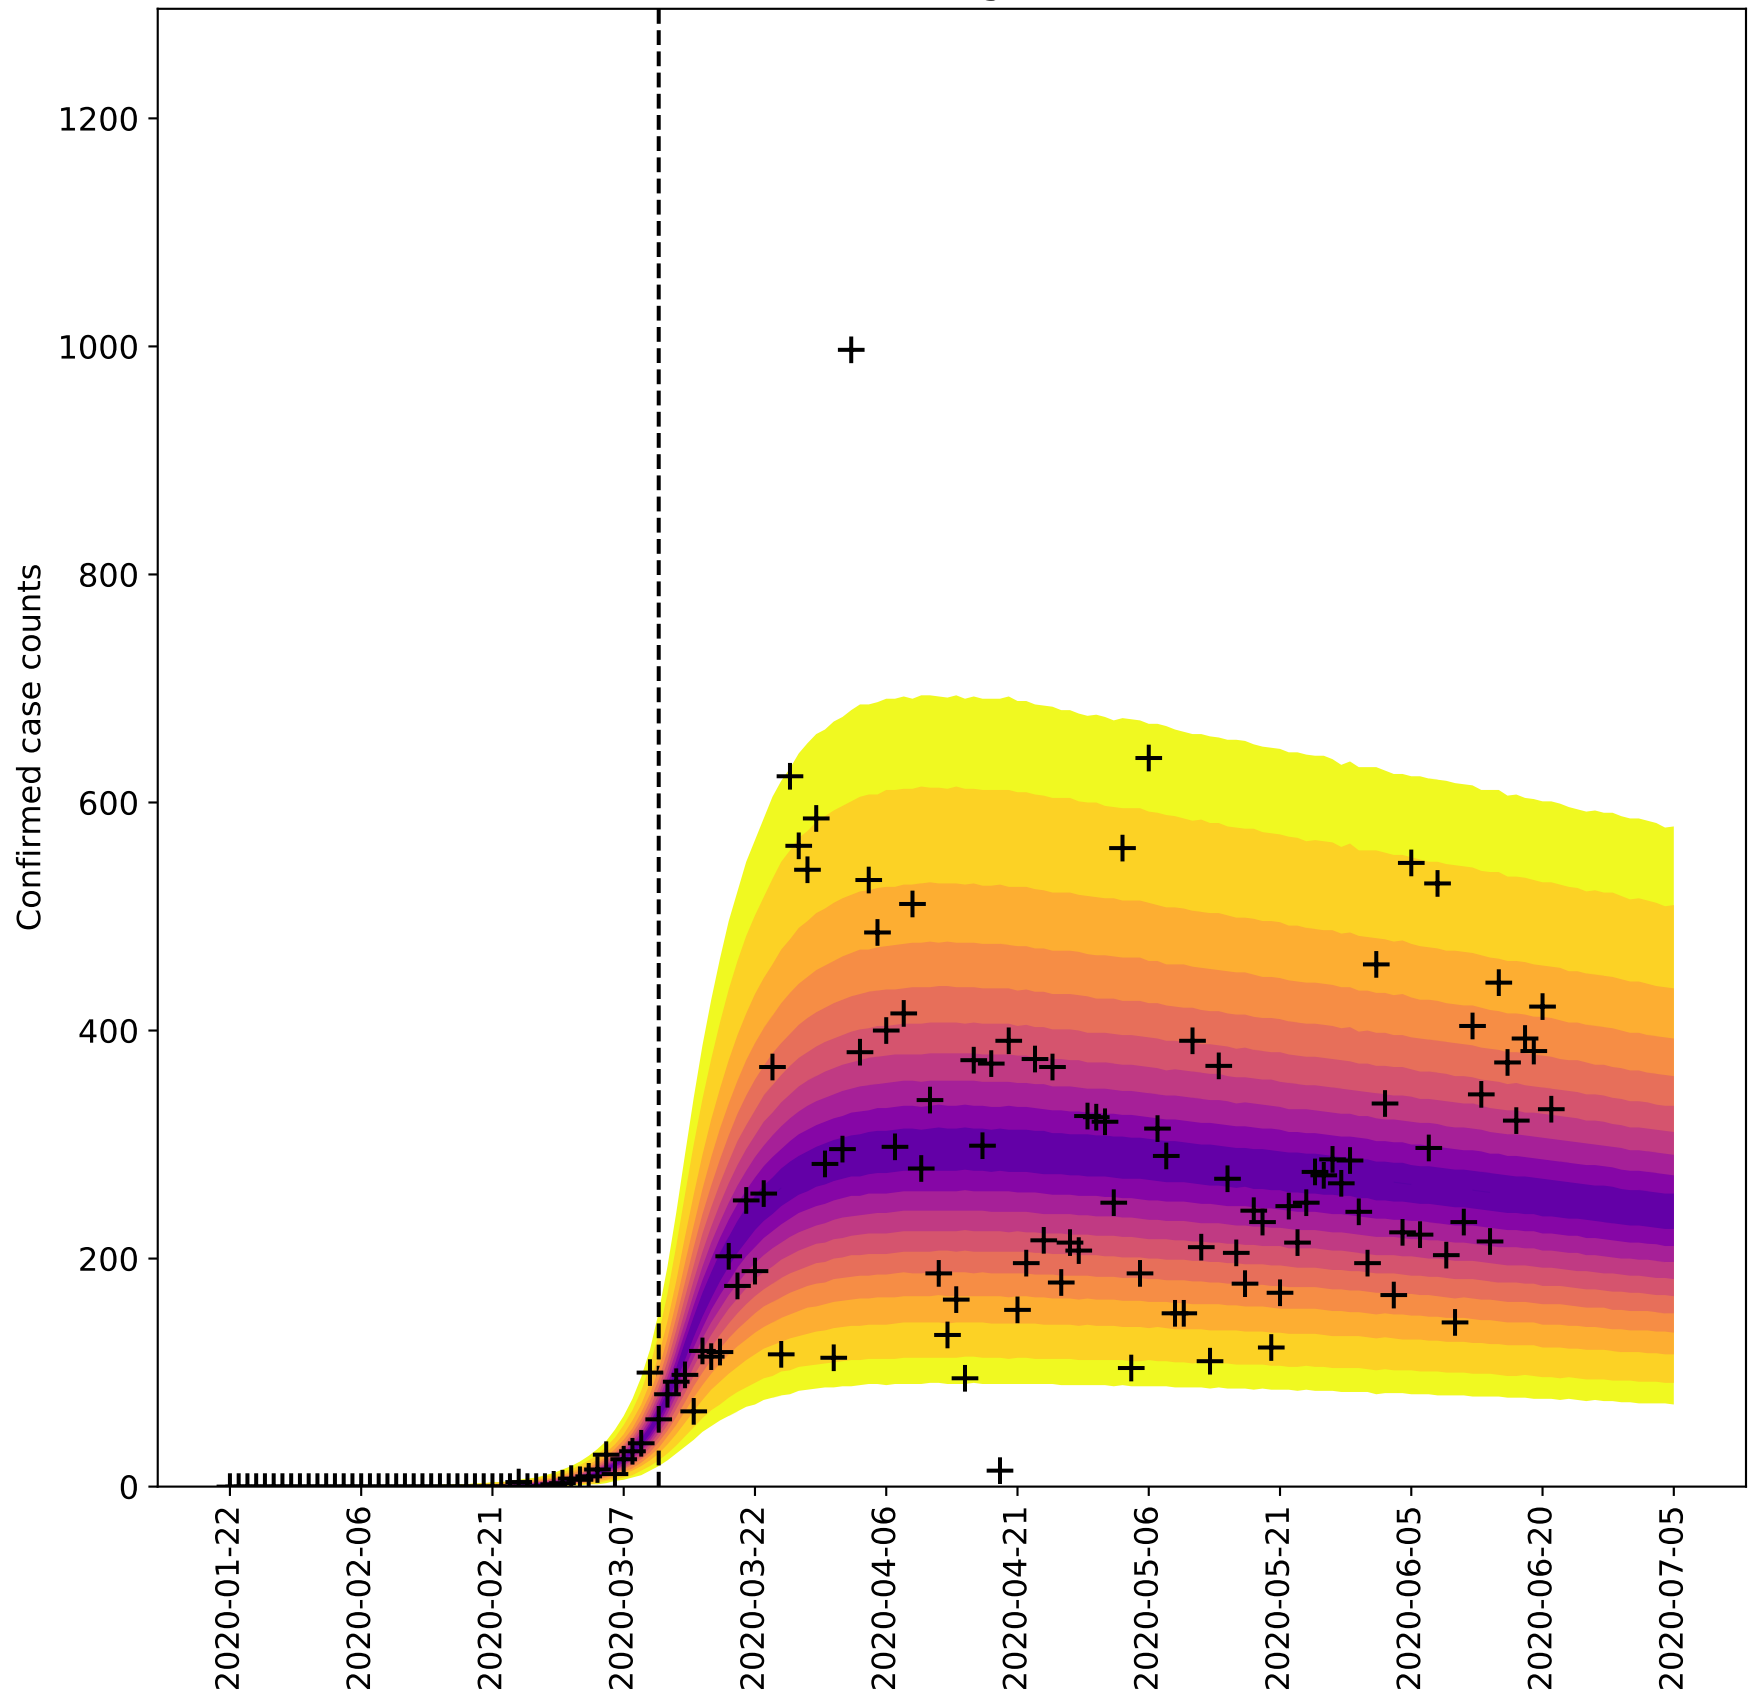

# West Virginia

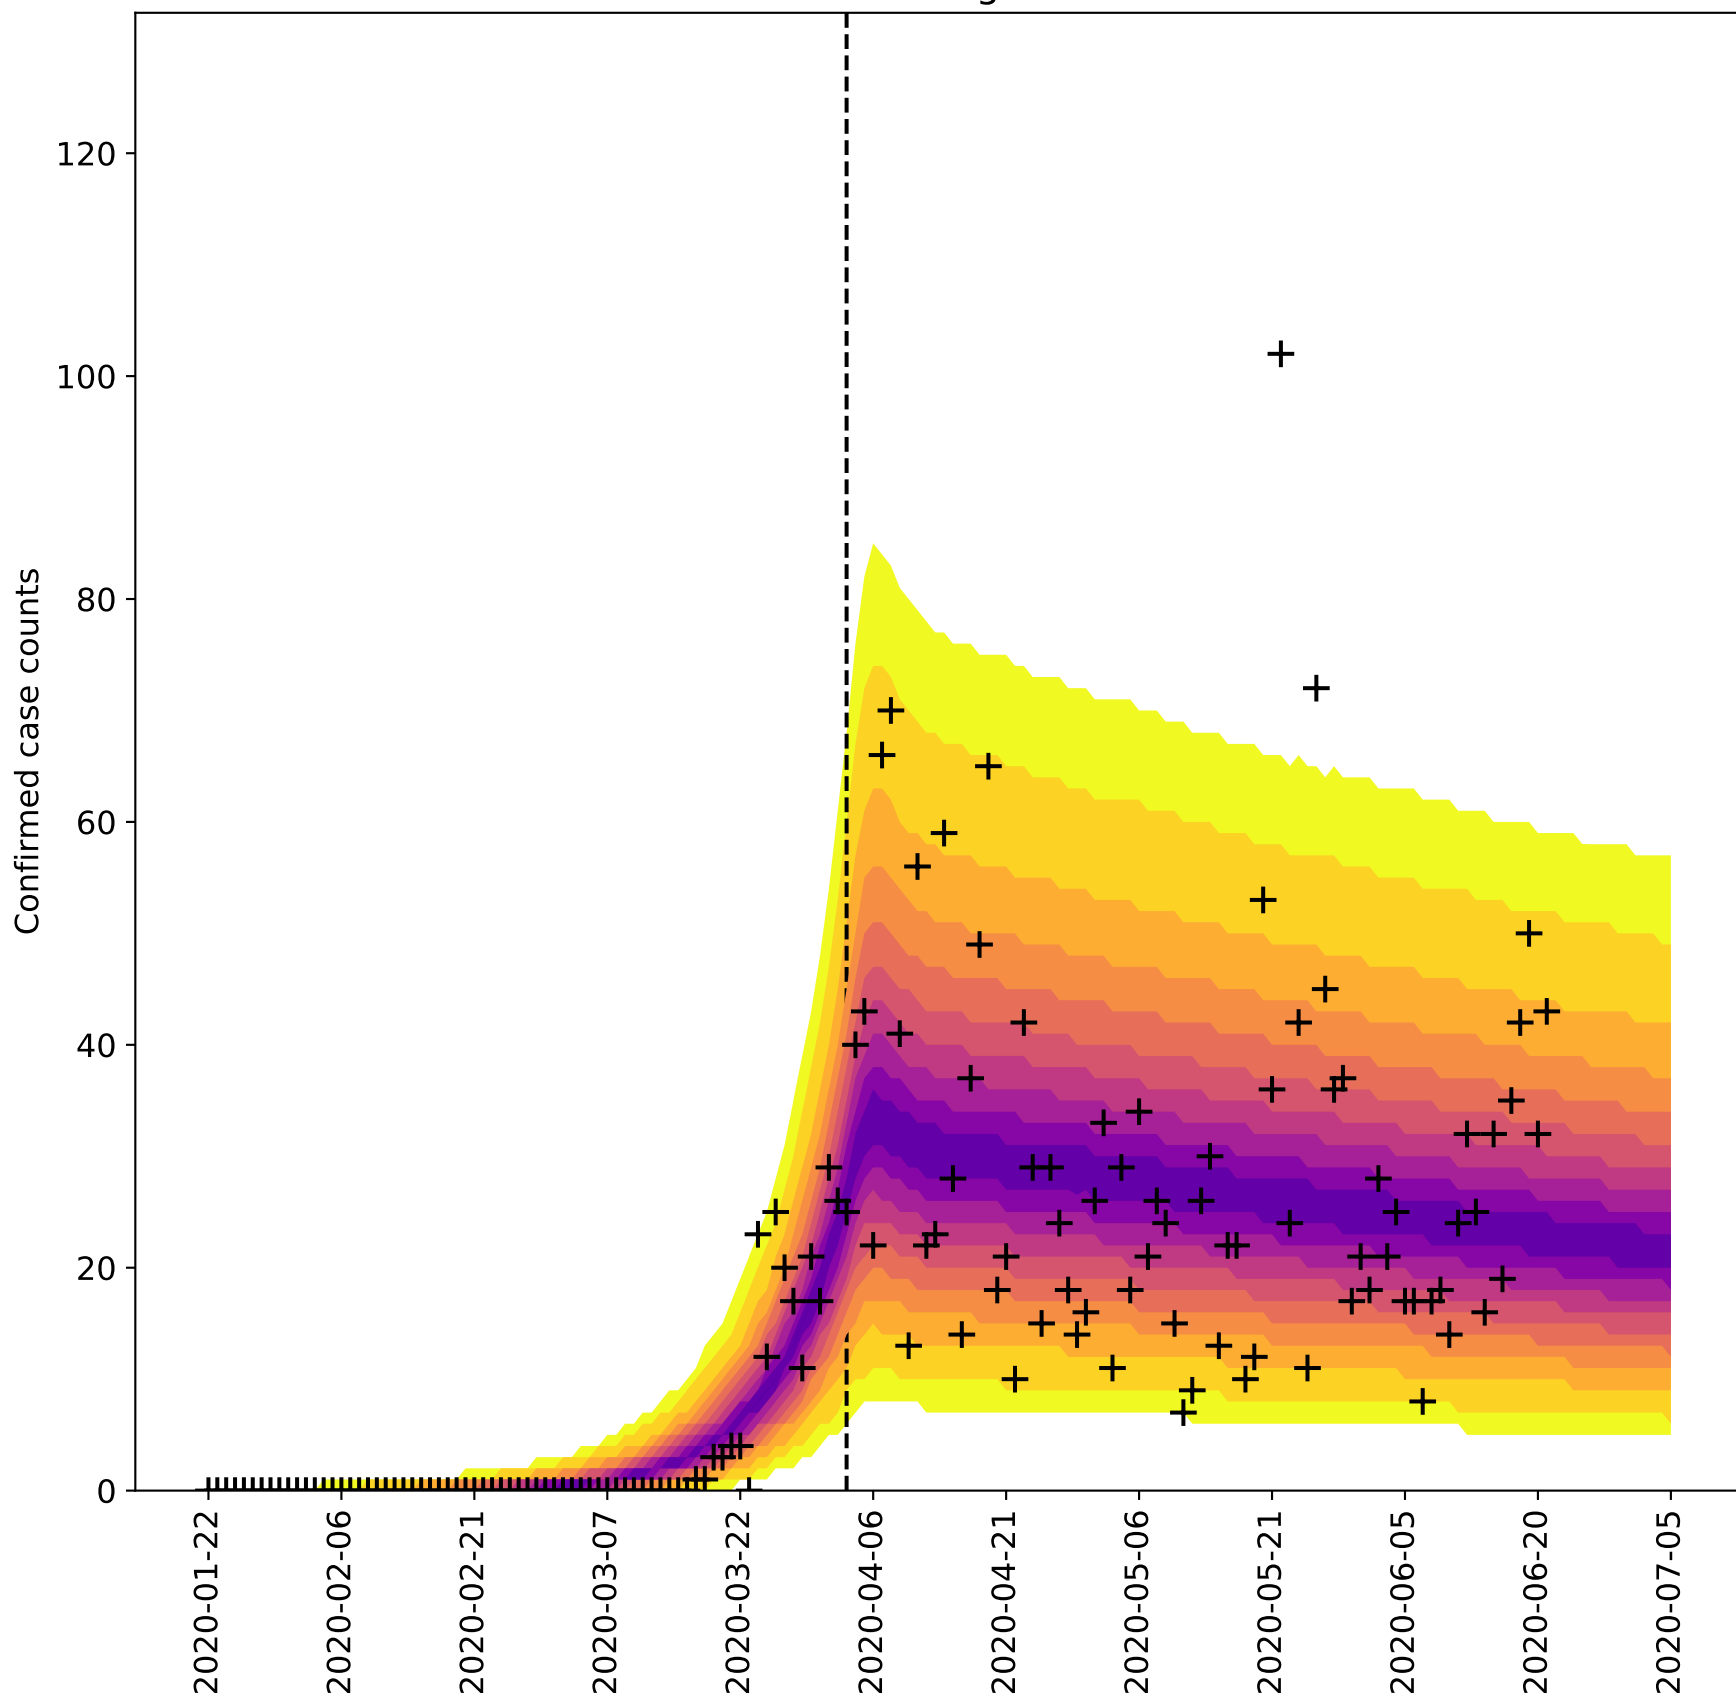

# Wisconsin

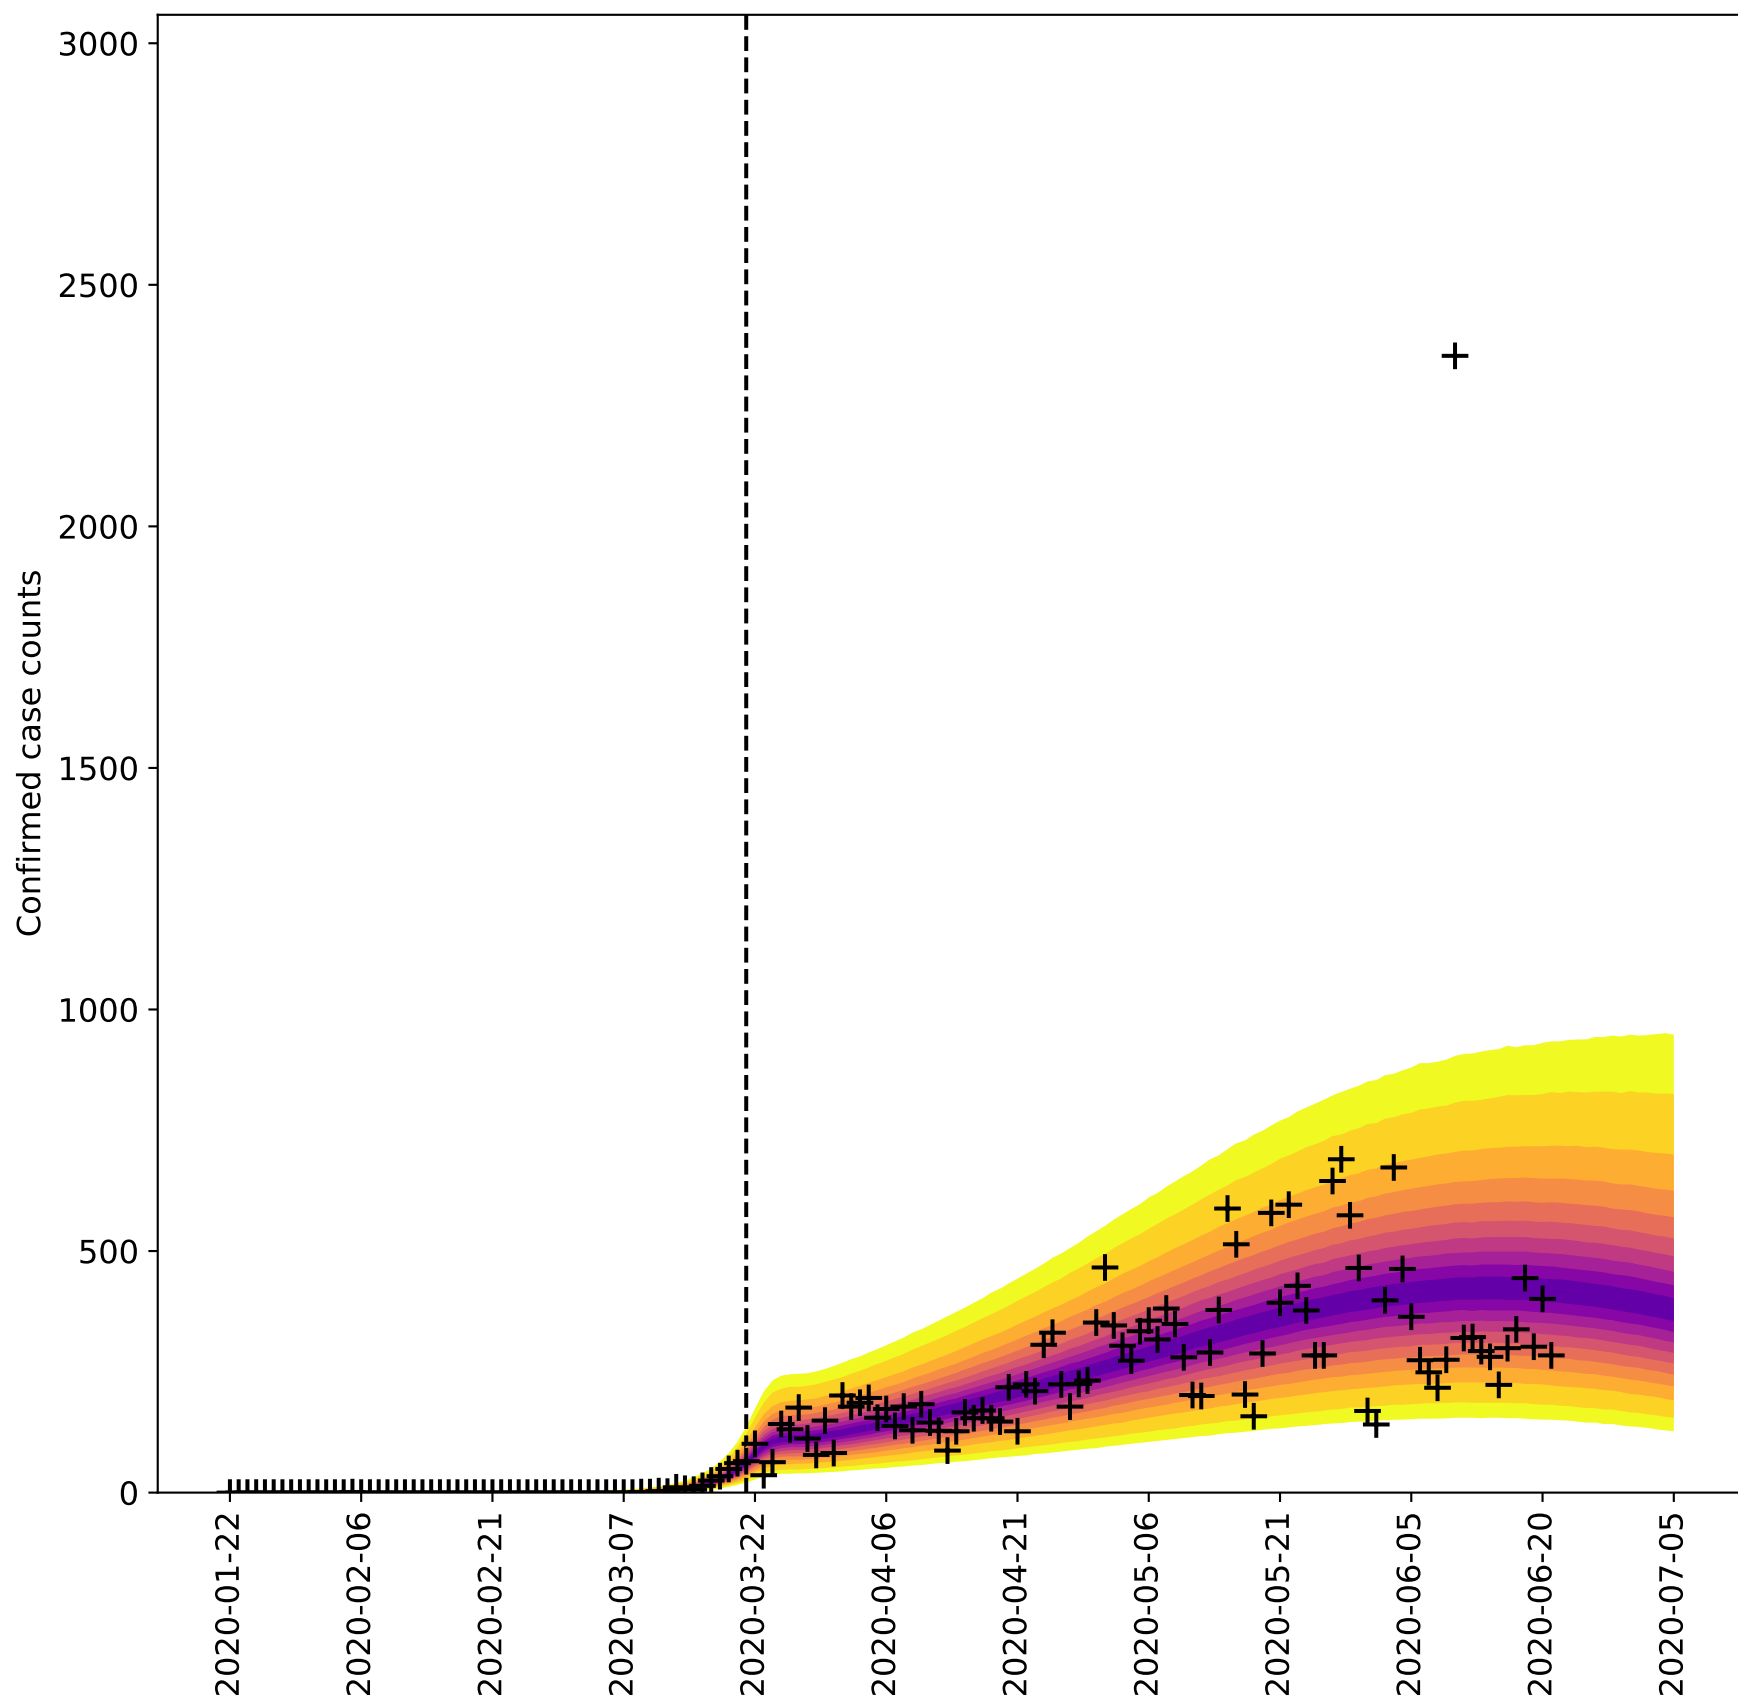

**Figure S6.** Consistency of model-derived  $\lambda$  estimates with empirical growth rates during initial exponential increase in disease incidence in 46 states of the US (i.e., excluding New Jersey, Wyoming, Florida, and Alaska; see Fig 3 in the main text). In each panel, the initial slope of the solid curve corresponds to  $\lambda$  (calculated as described in Materials and Methods), the crosses indicate empirical cumulative case counts, and the broken line is the model prediction based on MAP estimates for adjustable parameters. The solid curve is derived from the reduced model (Eqs. 1-8 in the SI). This curve shows cumulative case counts had there not been any interventions to limit disease transmission. As can be seen, the initial slopes of the solid and broken curves are comparable. It should be noted that, in contrast with Fig S5, the y-axis here indicates cumulative (vs. daily) number of cases on a logarithmic (vs. linear) scale.



# Alabama

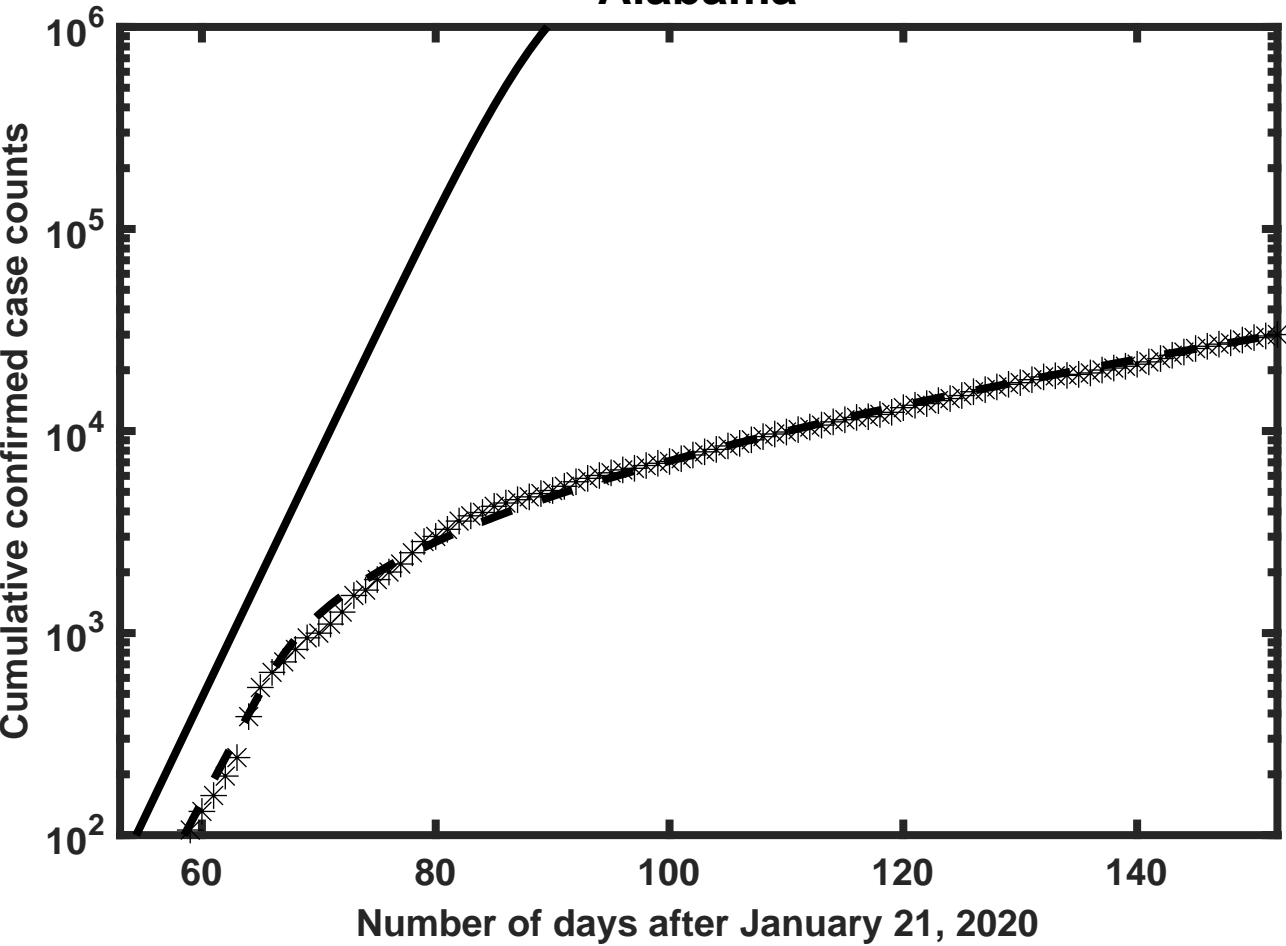

# Arizona

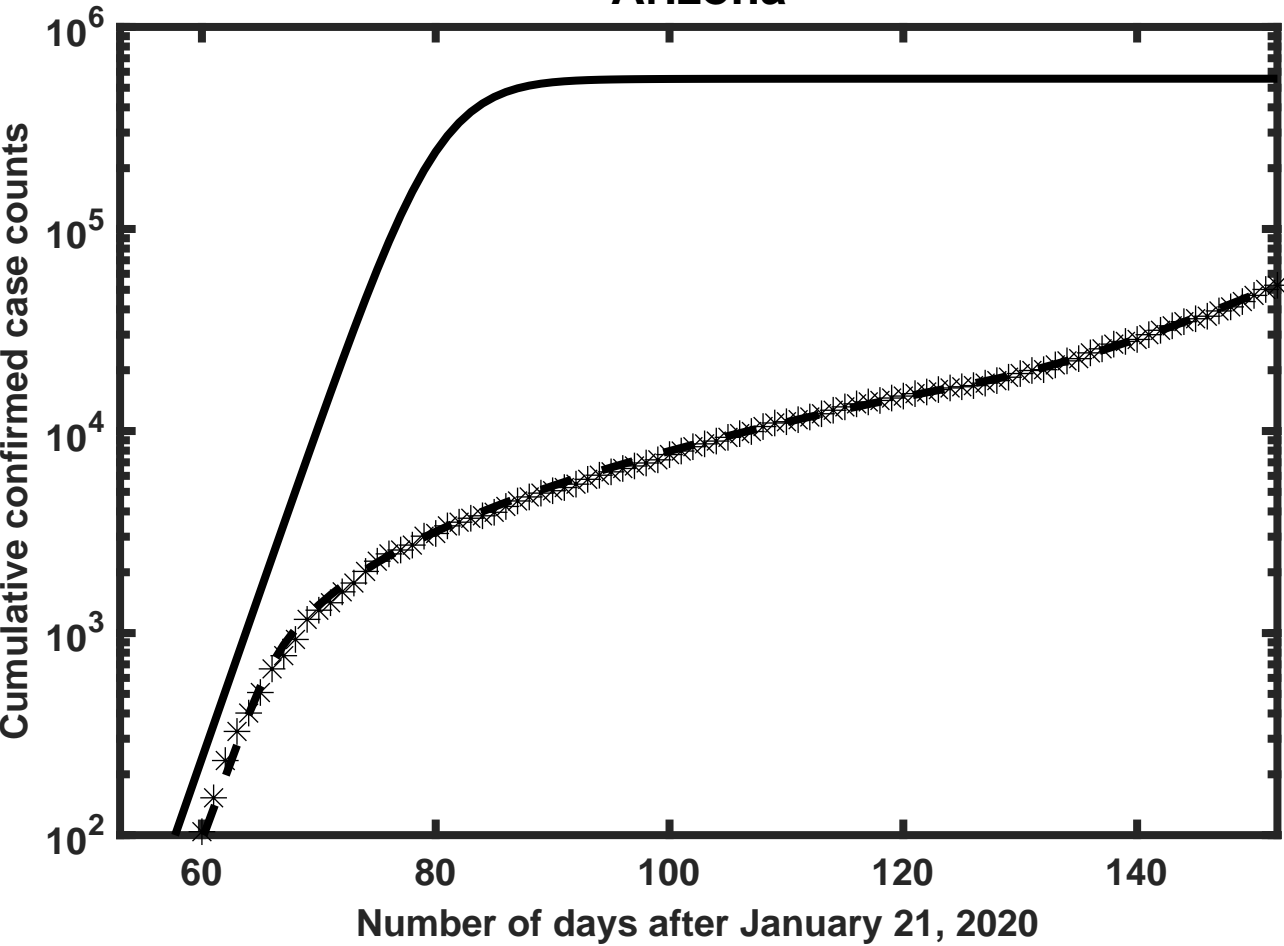

# Arkansas

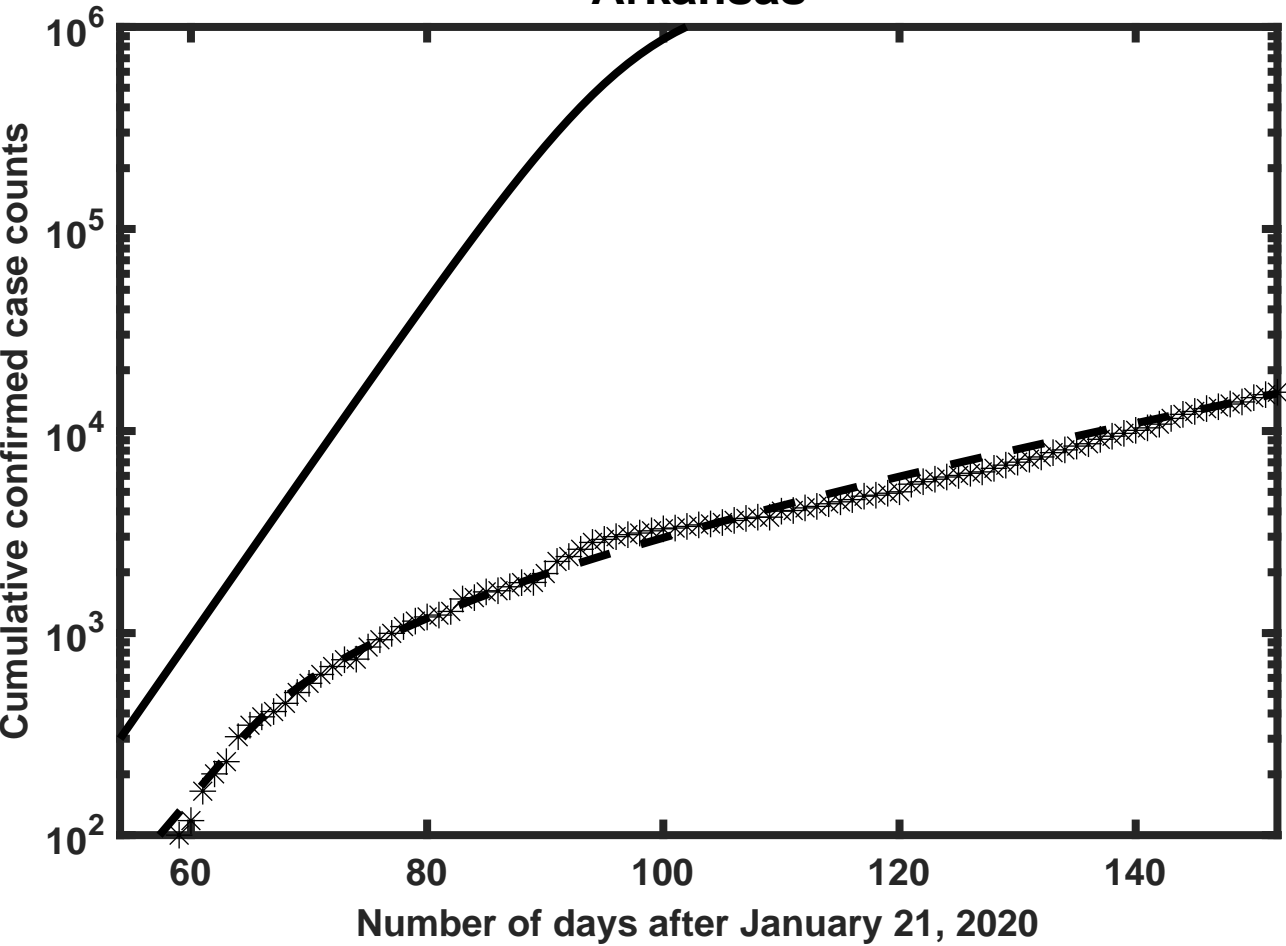

# California

Cumulative confirmed case counts

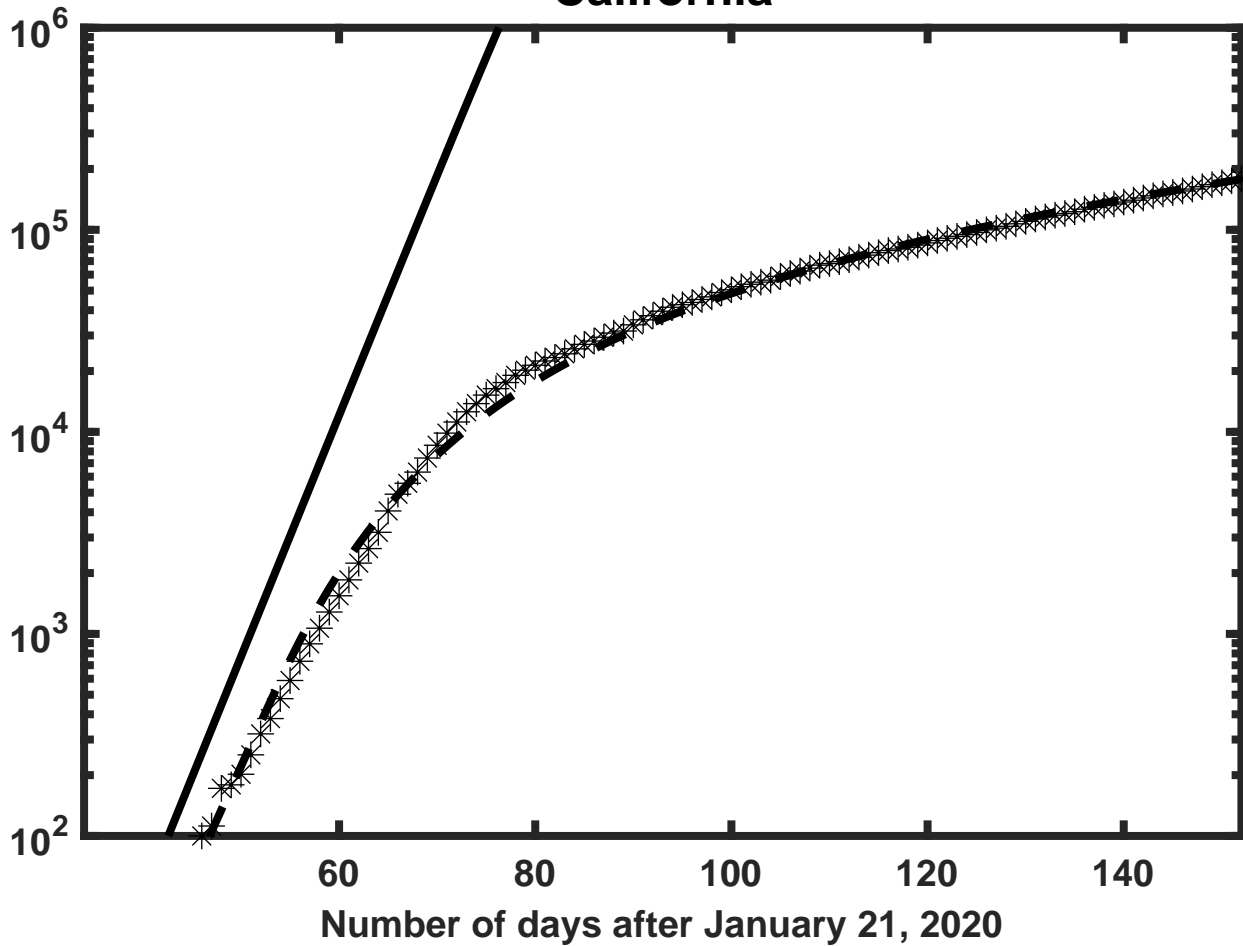

# Colorado

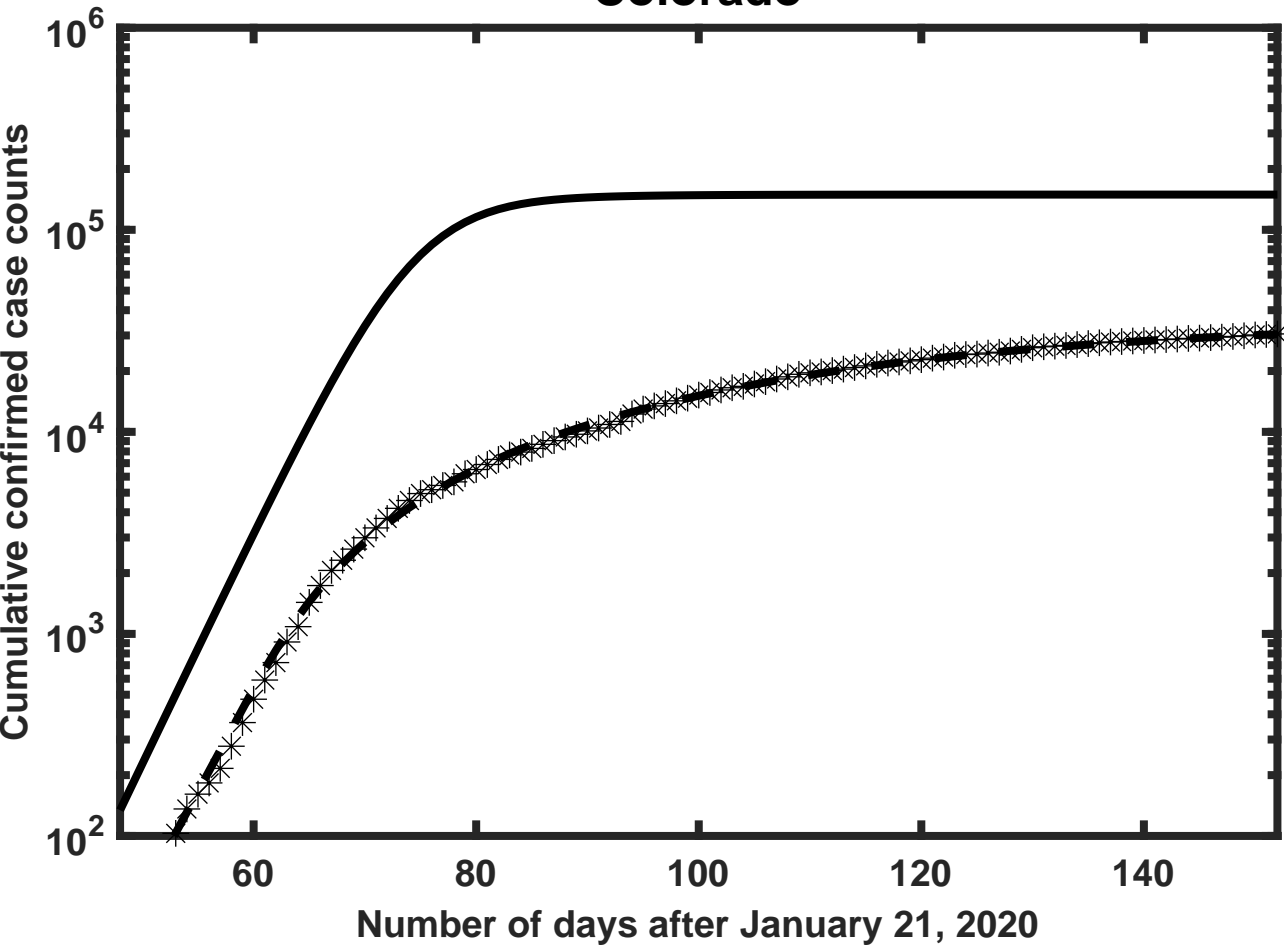

# Connecticut

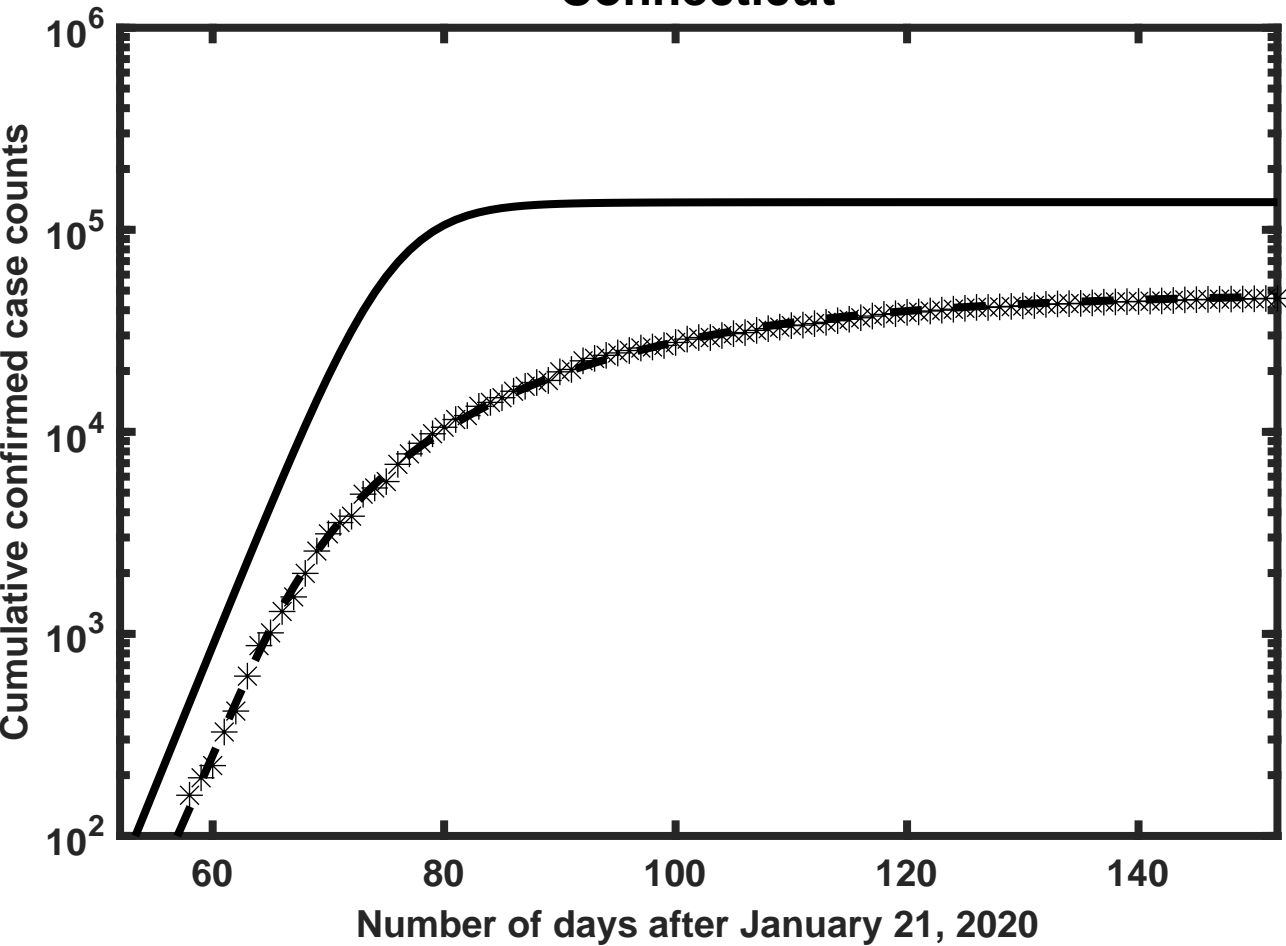

# Delaware

Cumulative confirmed case counts

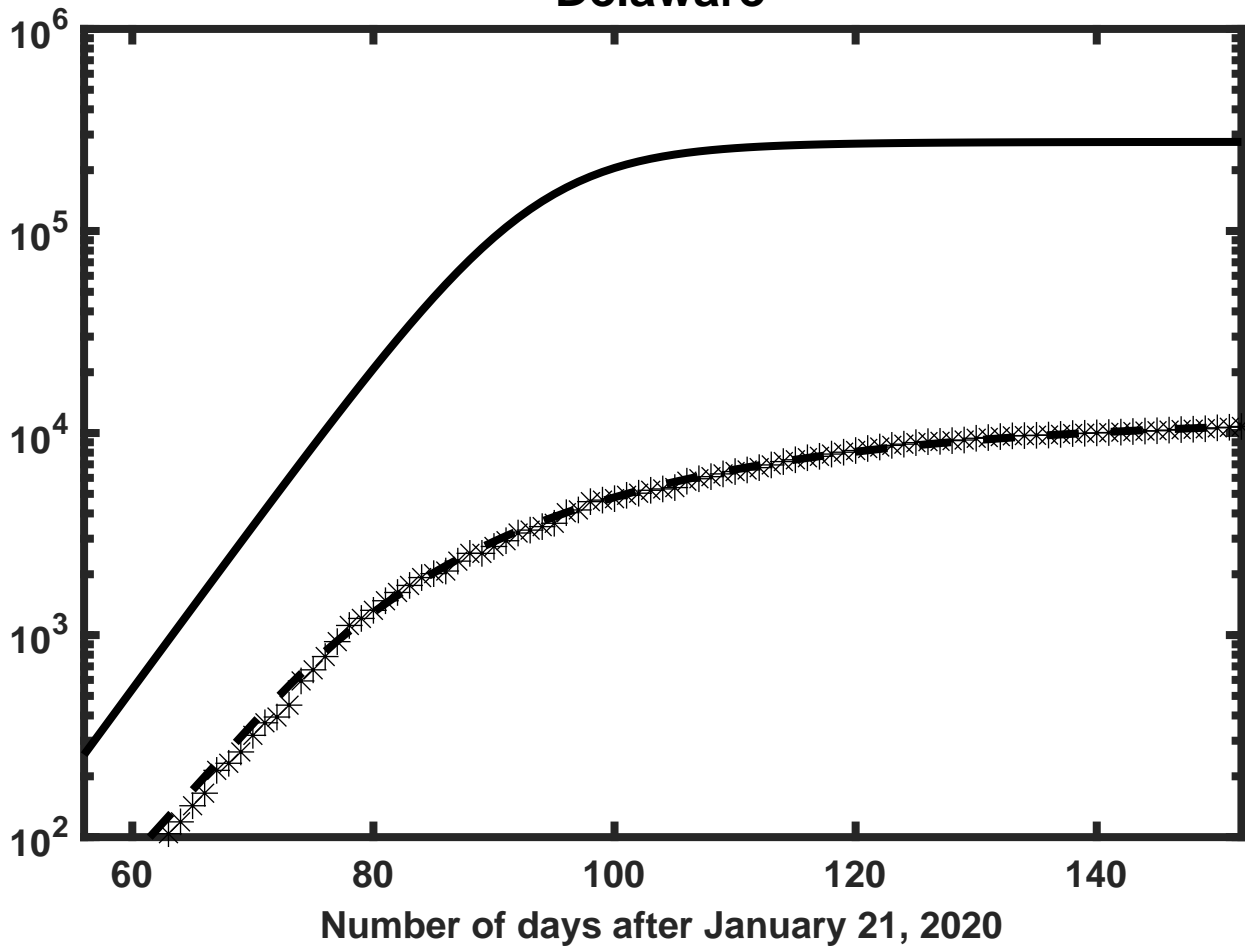

# Georgia

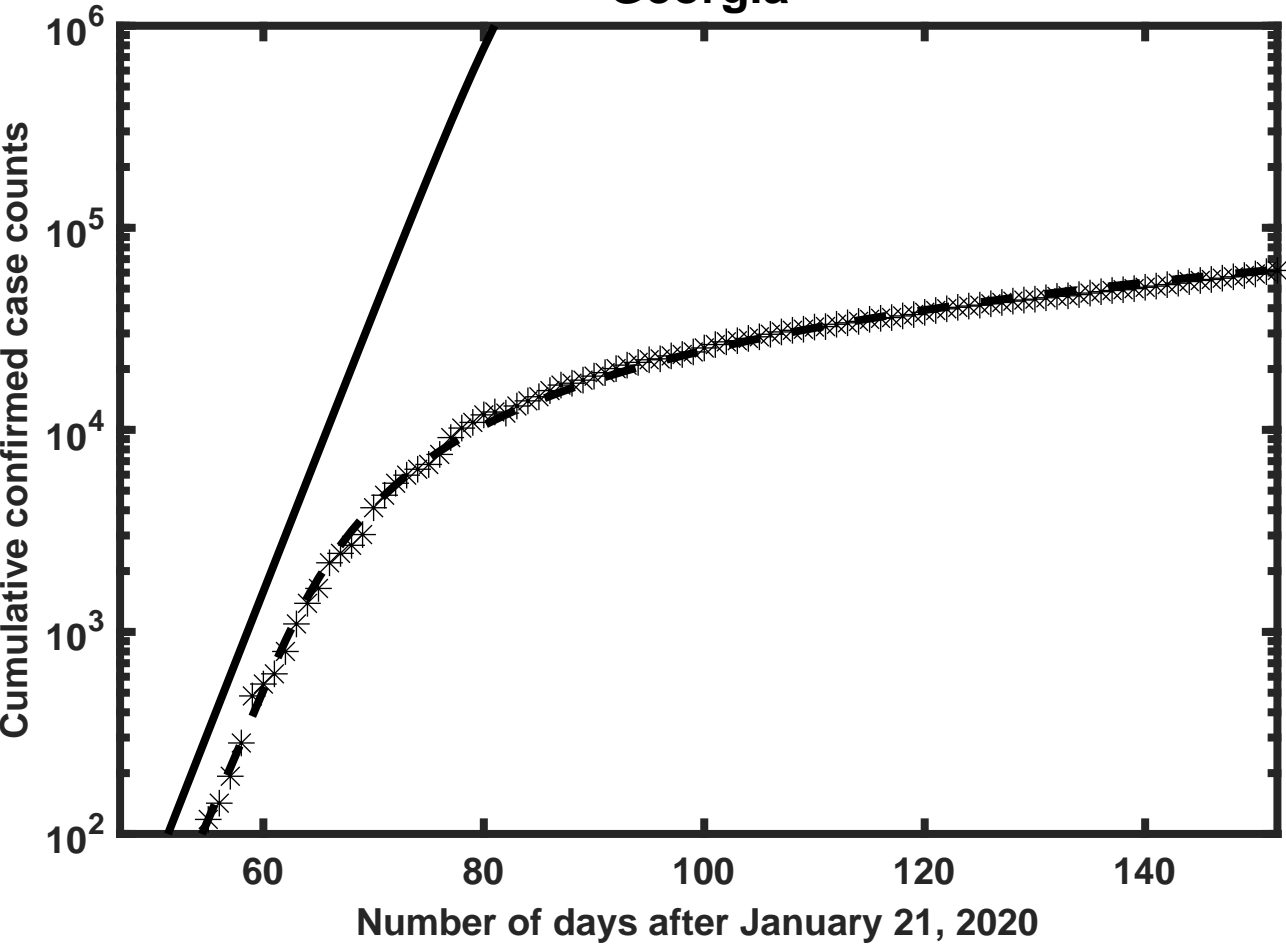



# Hawaii

Cumulative confirmed case counts

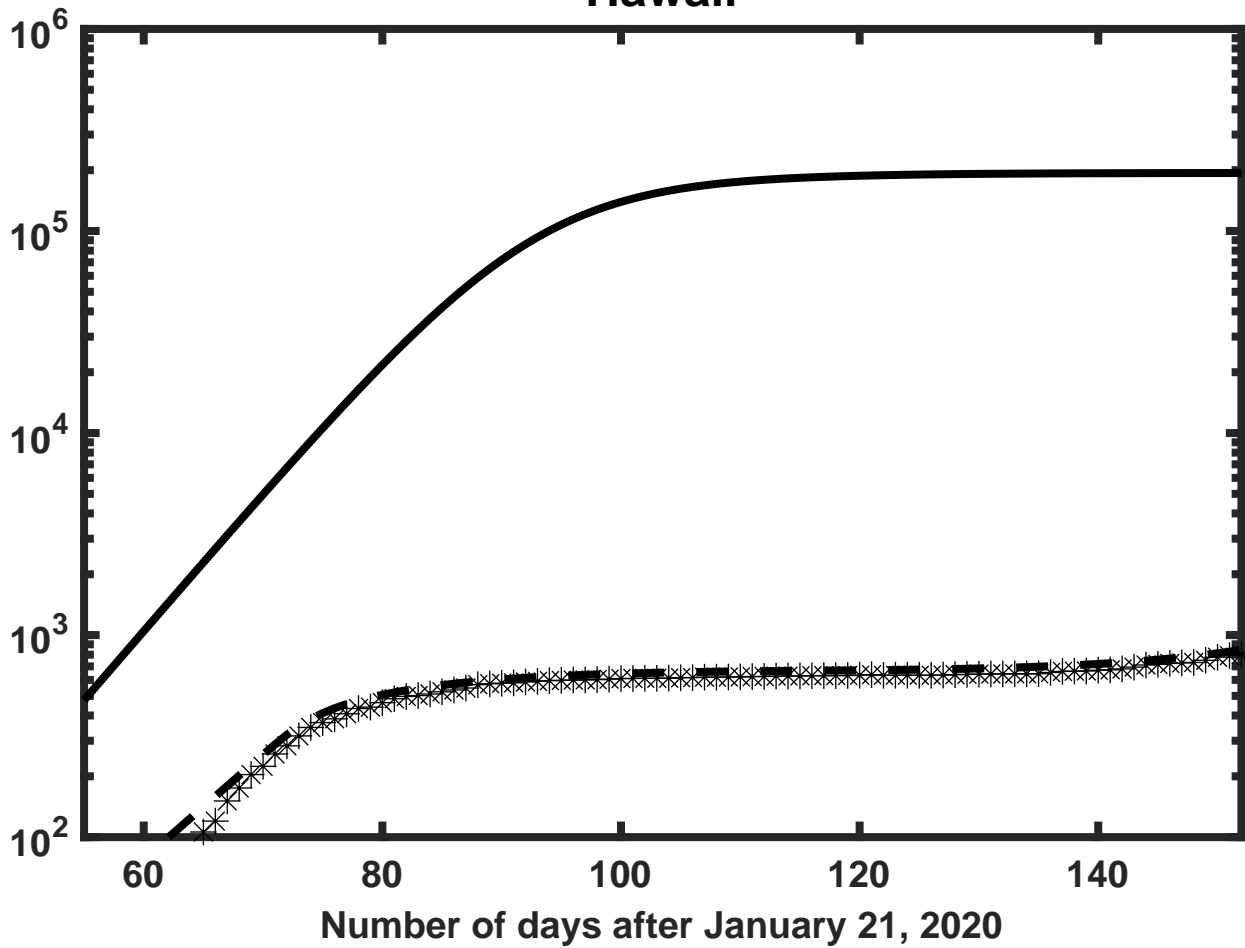

# Idaho

Cumulative confirmed case counts

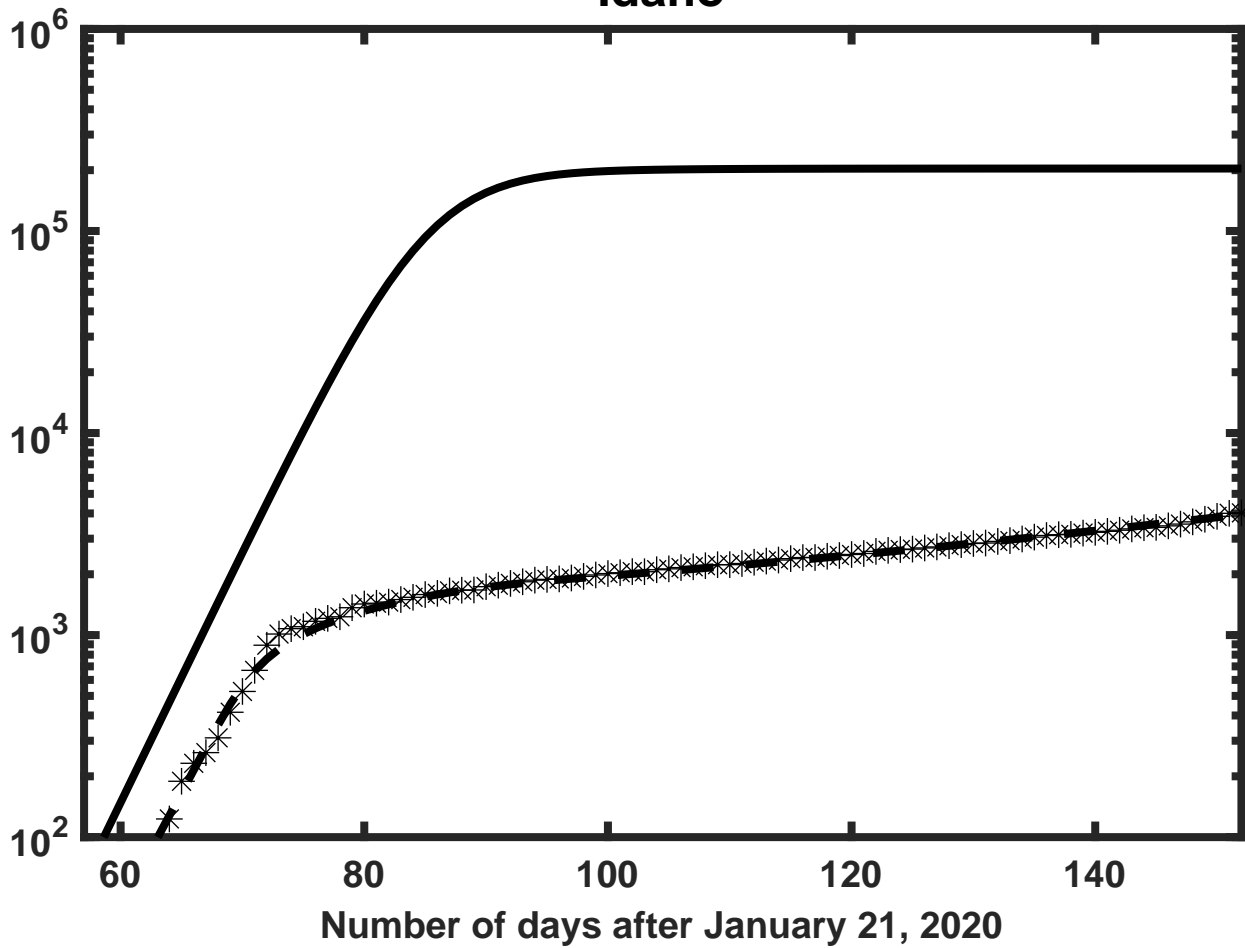

# Illinois

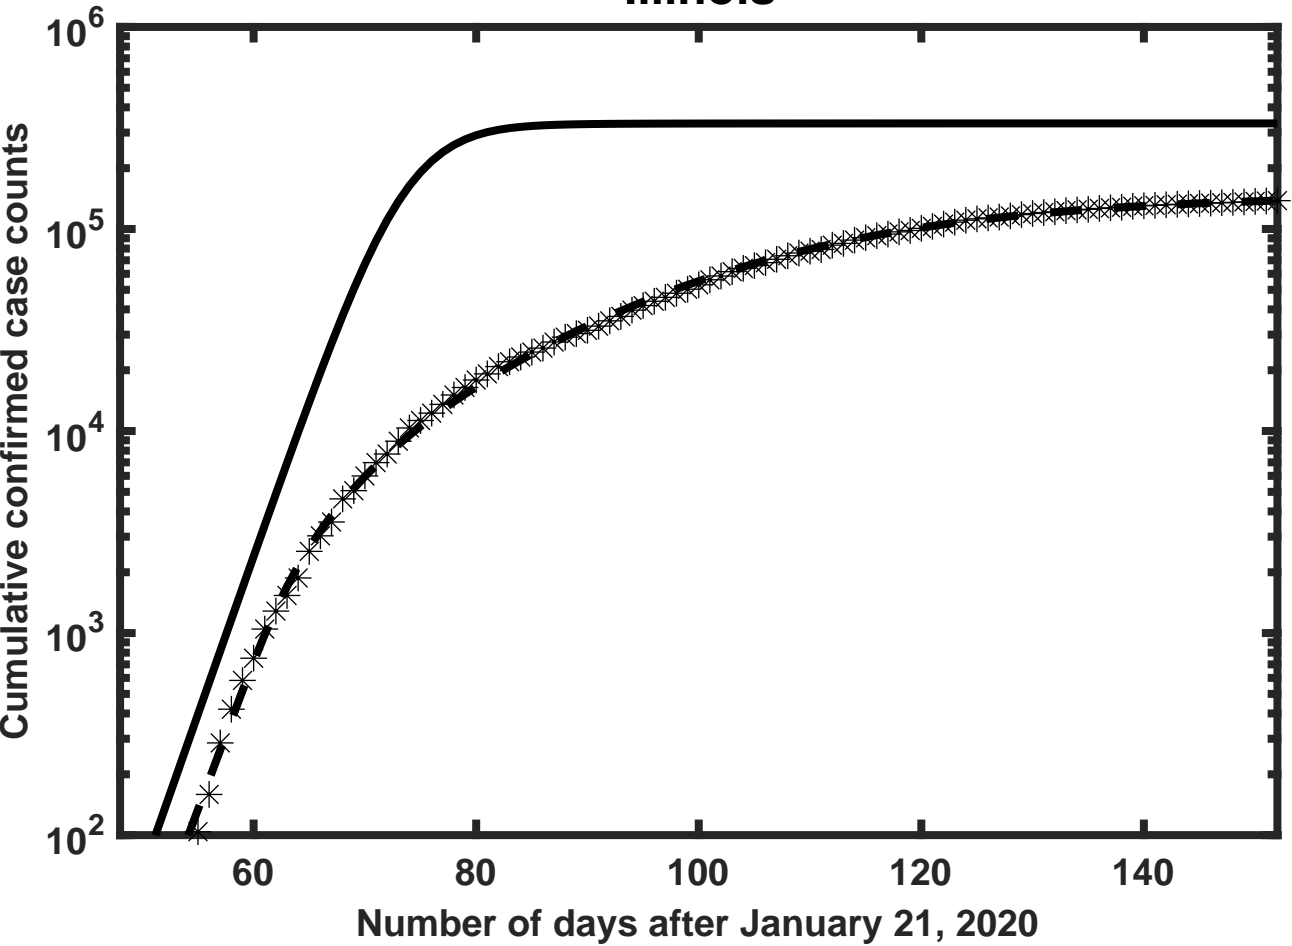

# Indiana

Cumulative confirmed case counts

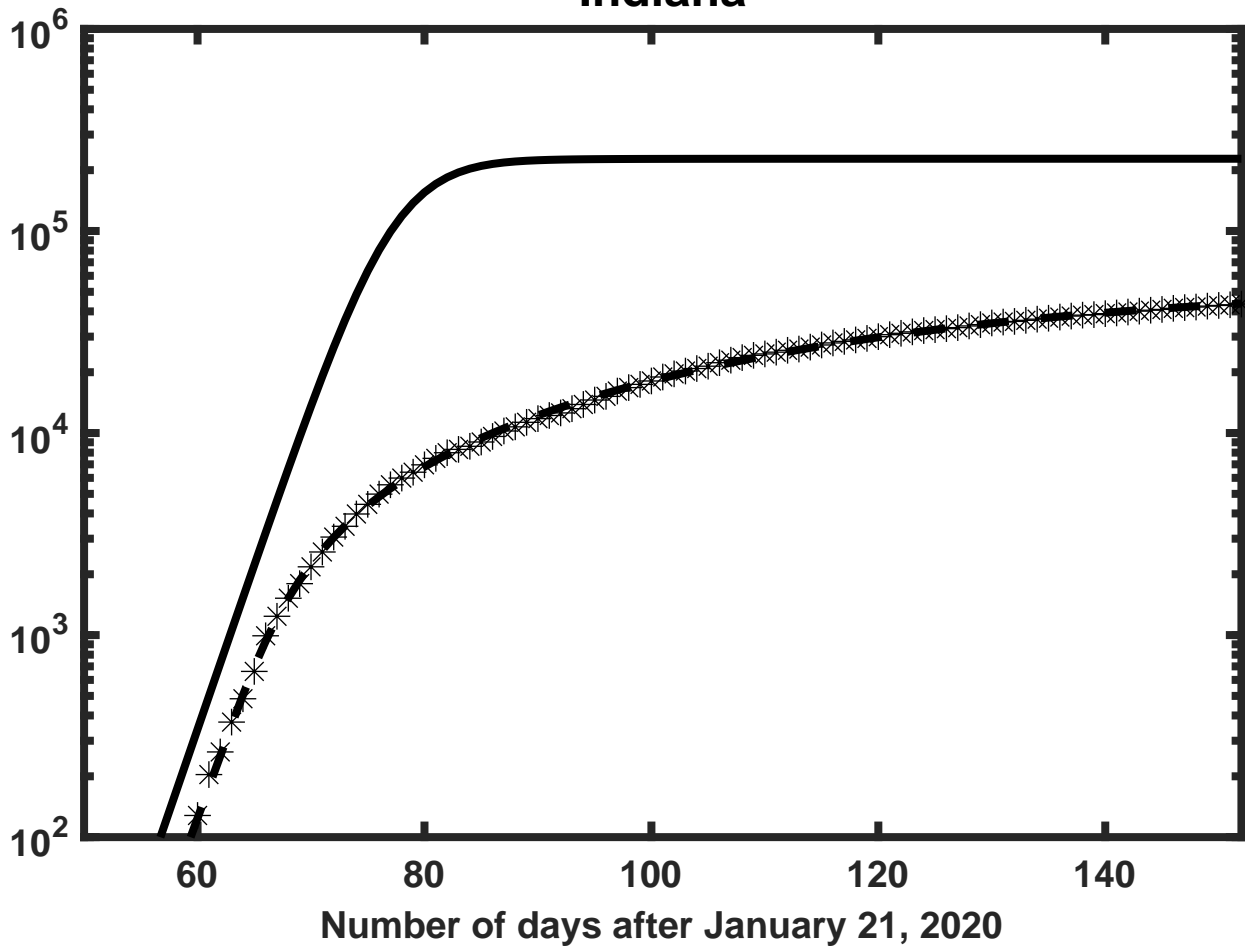

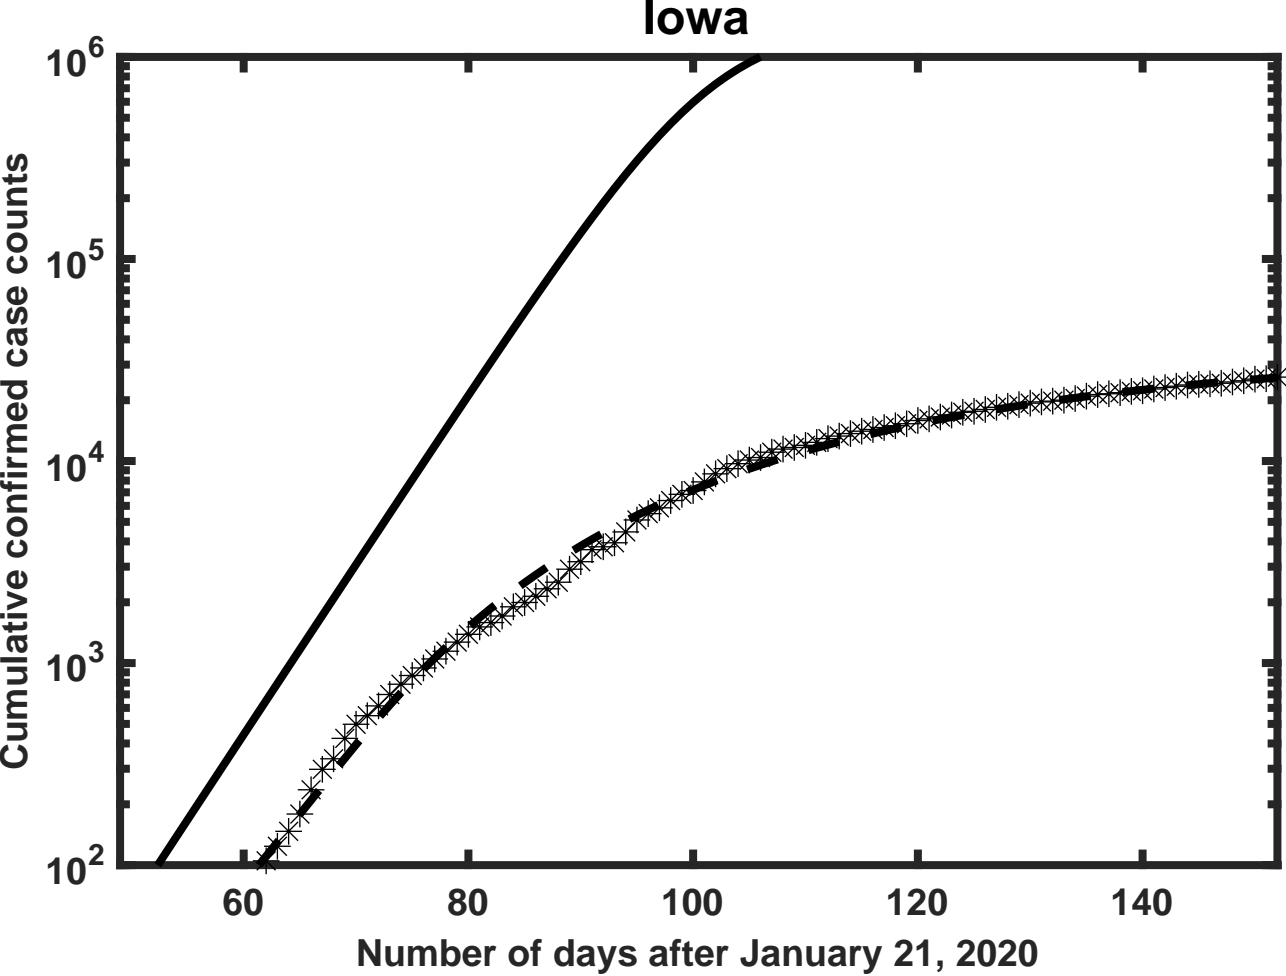

# Kansas

Cumulative confirmed case counts

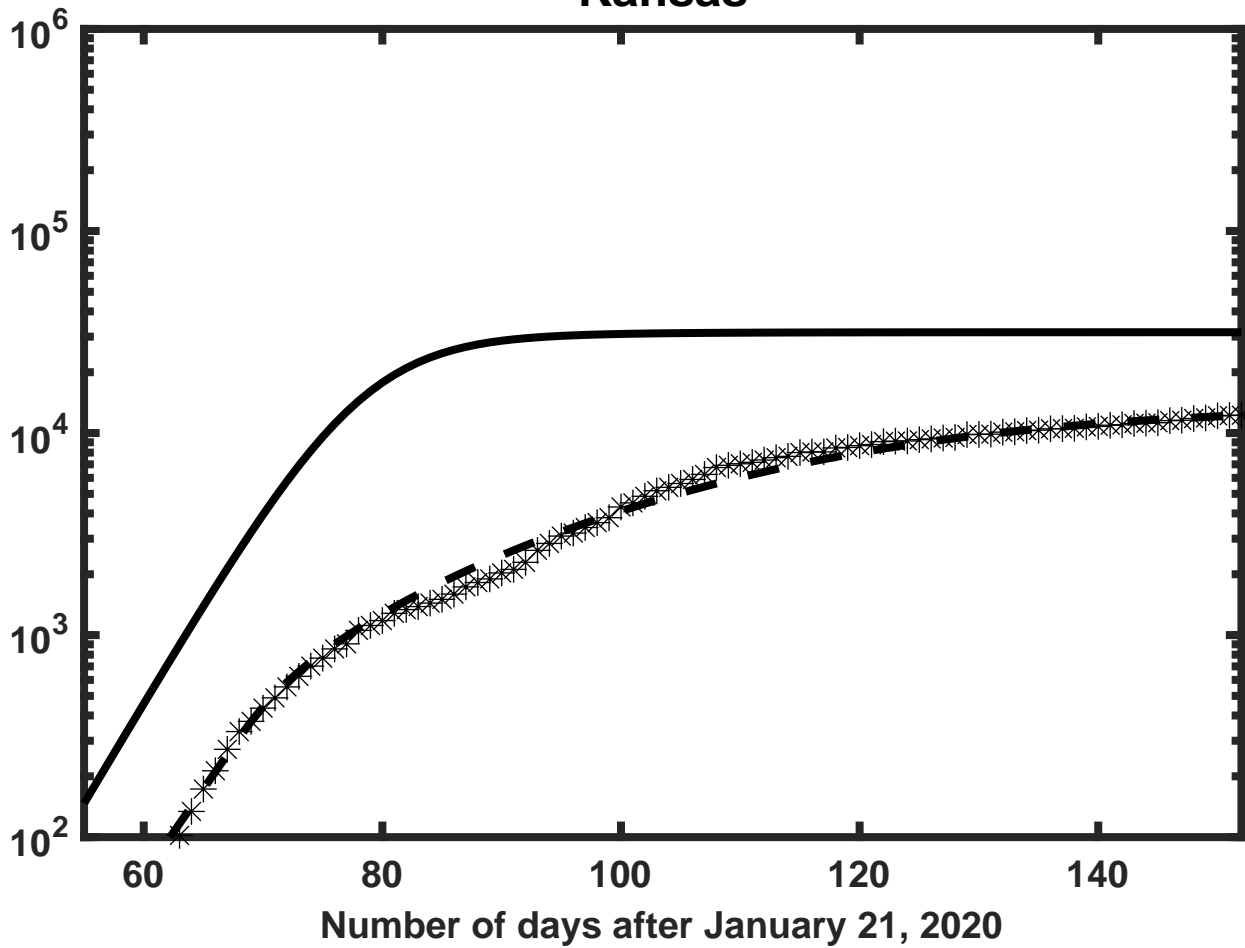

# Kentucky

Cumulative confirmed case counts

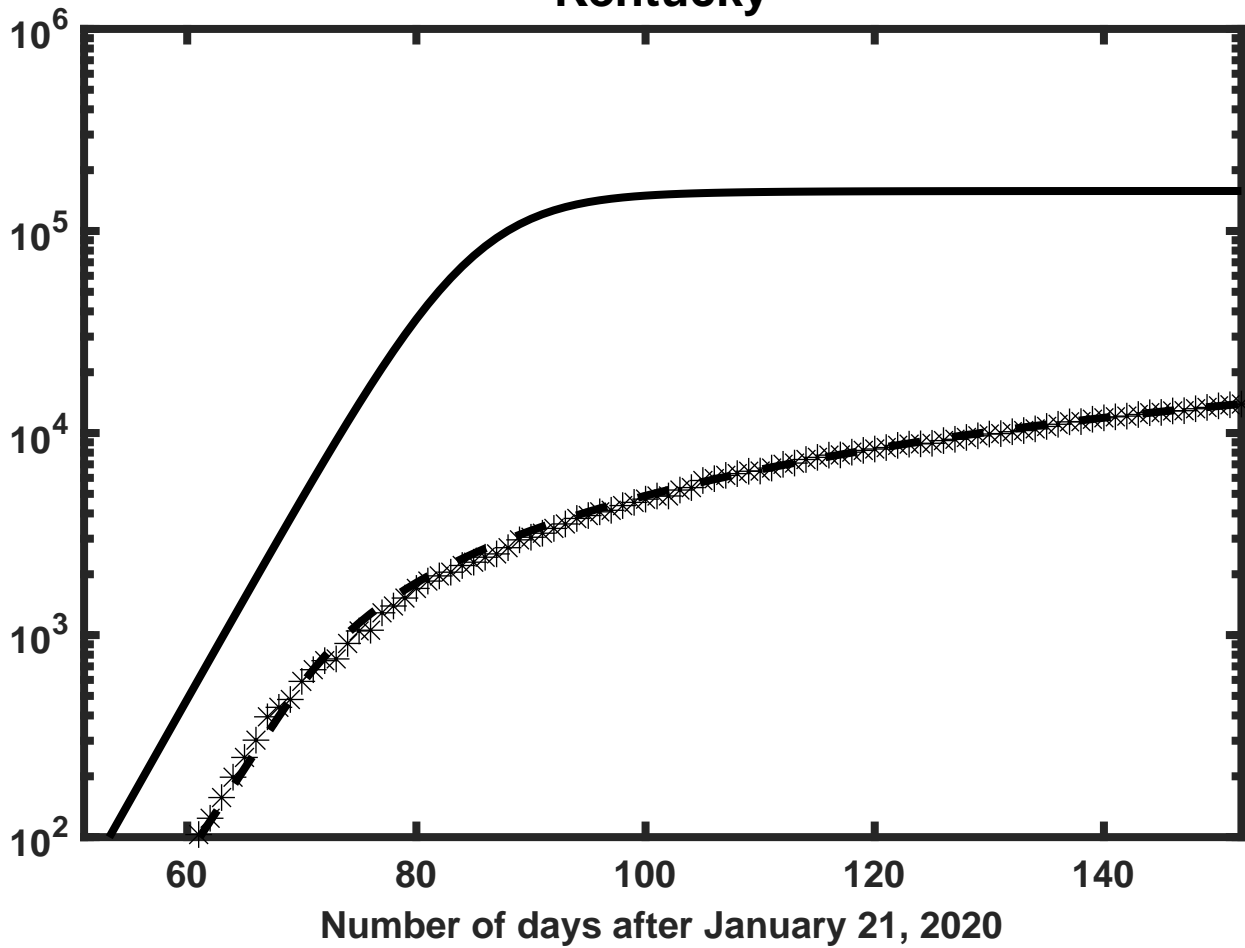

# Louisiana

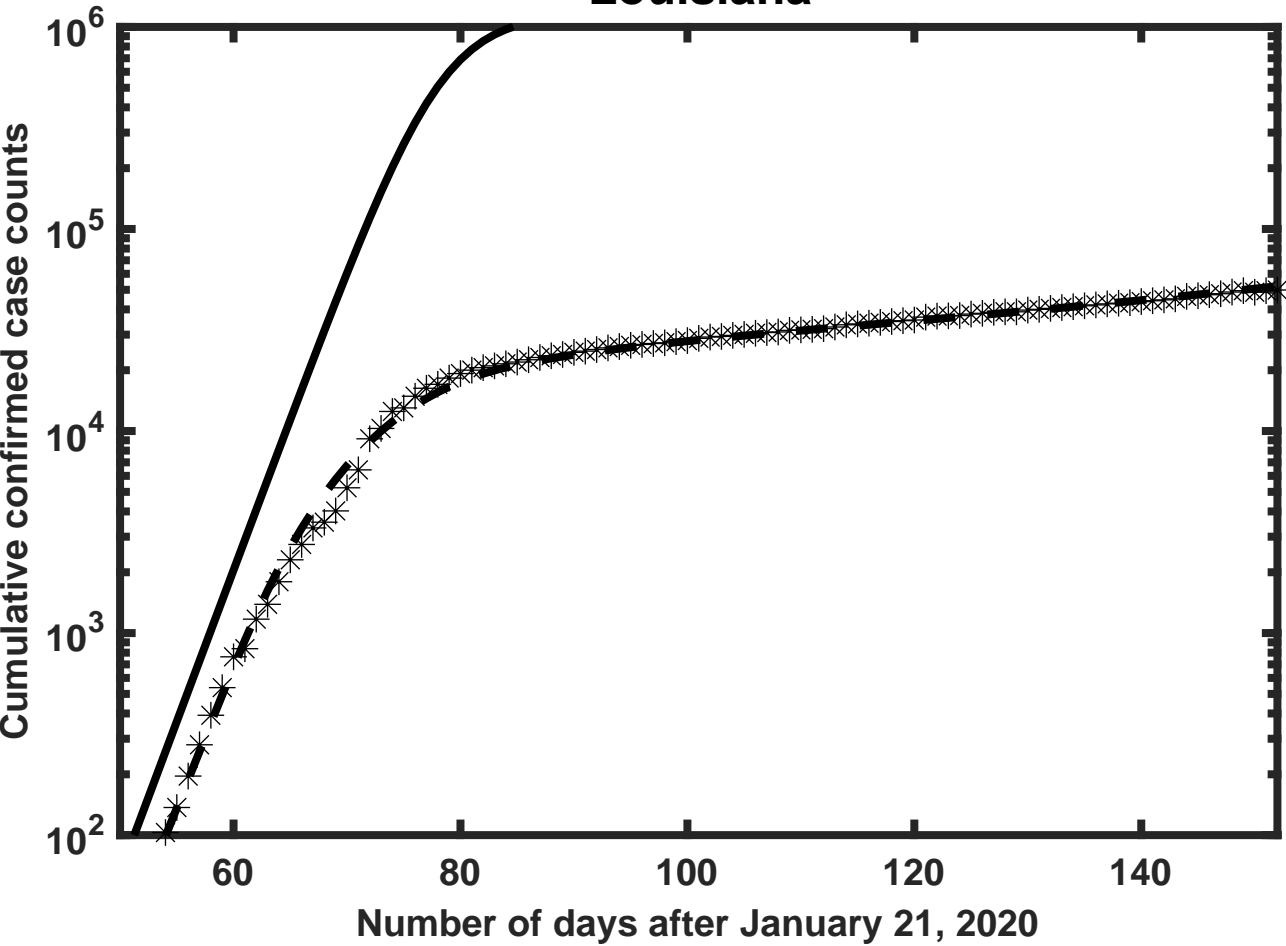



# Maine

Cumulative confirmed case counts

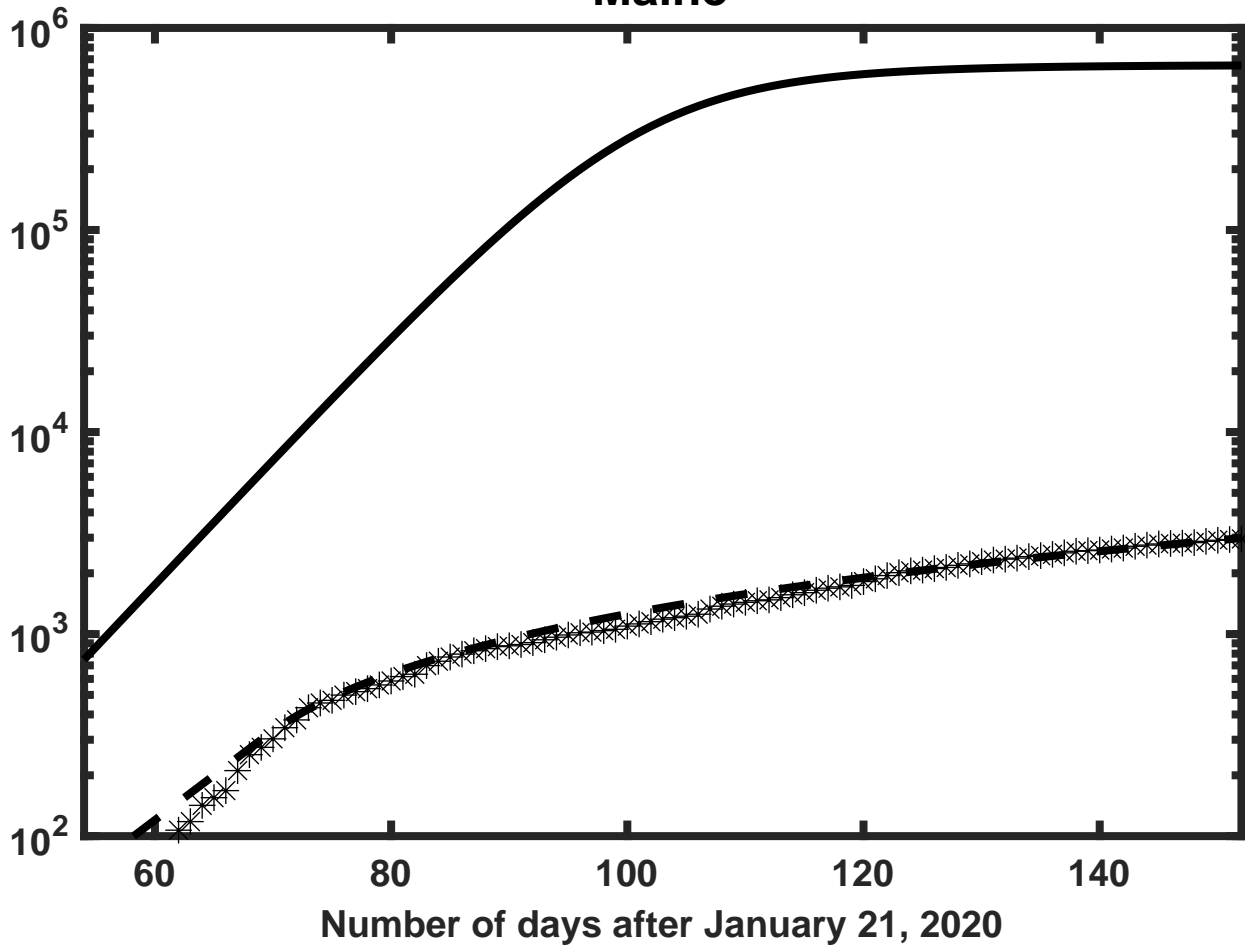

# Maryland

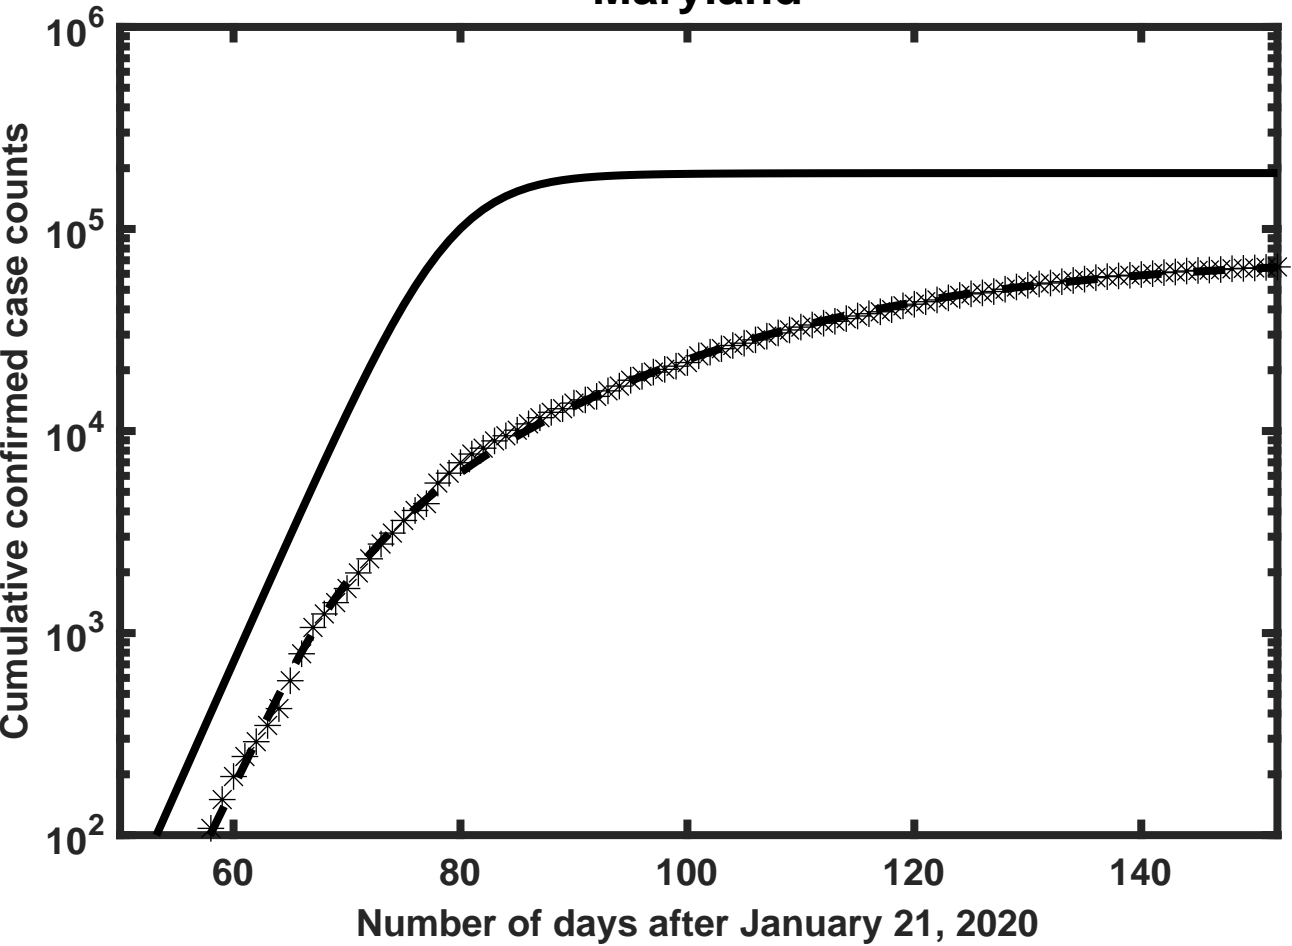

# Massachusetts

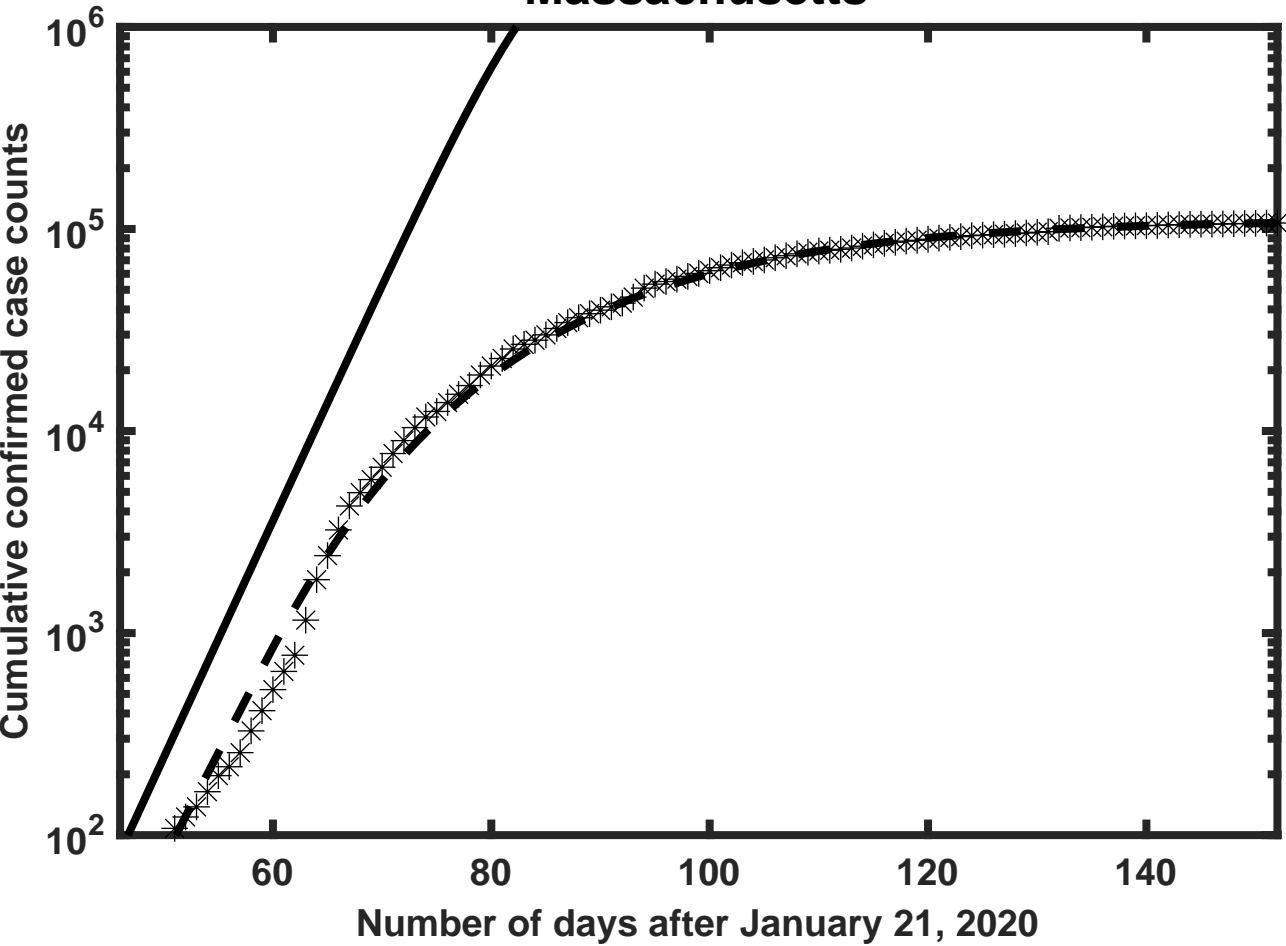

# Michigan

Cumulative confirmed case counts

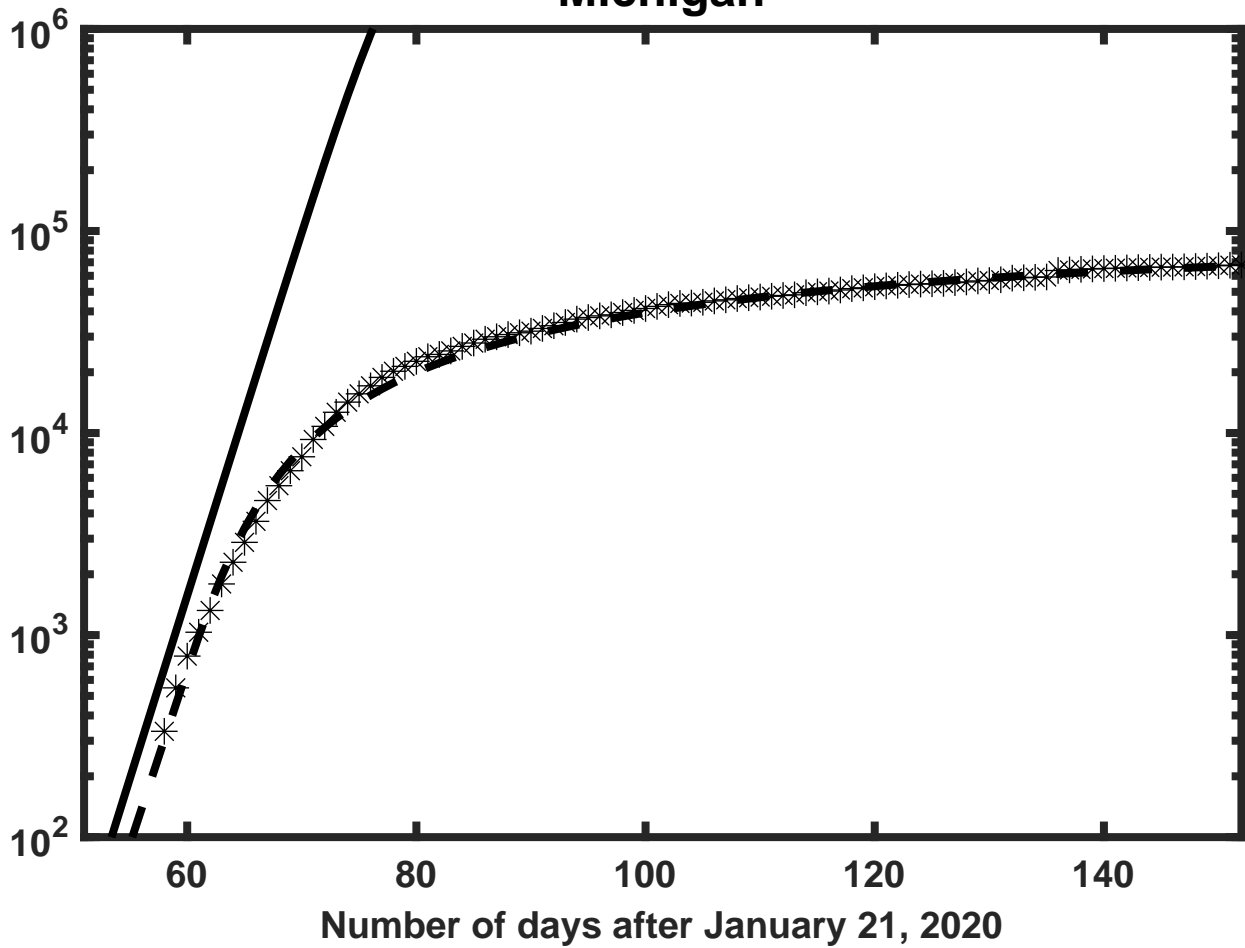

# Minnesota

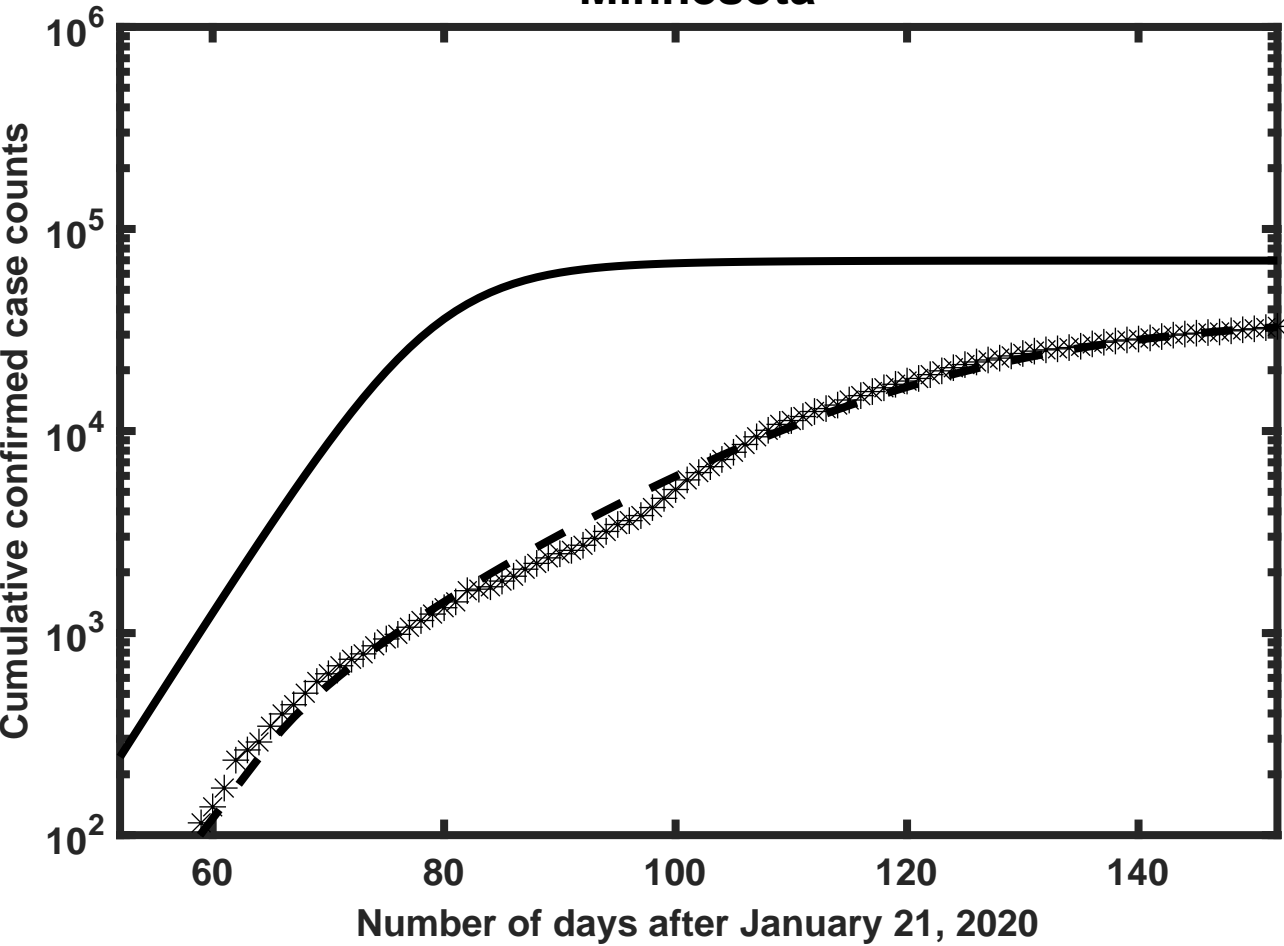

# Mississippi

Cumulative confirmed case counts

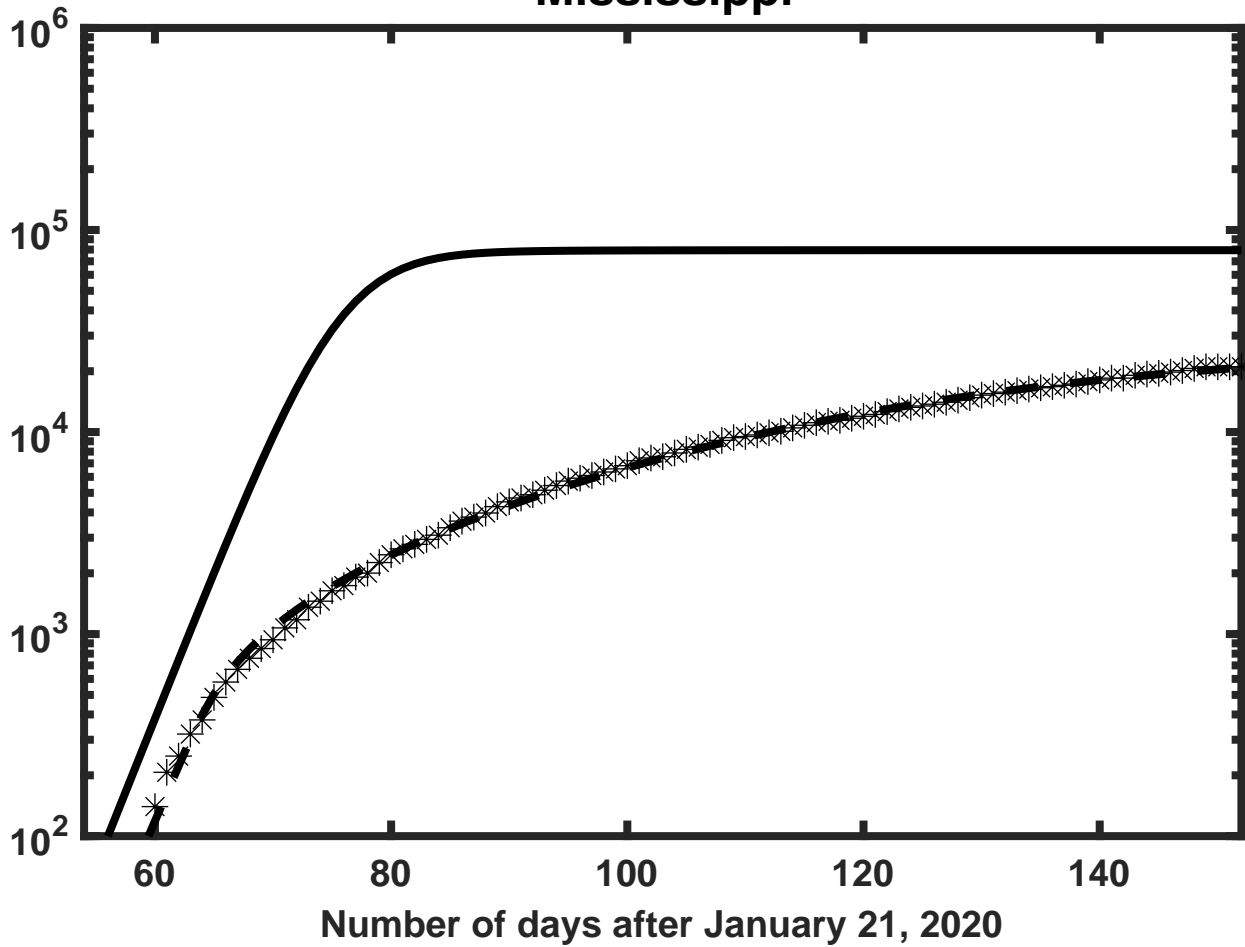

# Missouri

Cumulative confirmed case counts

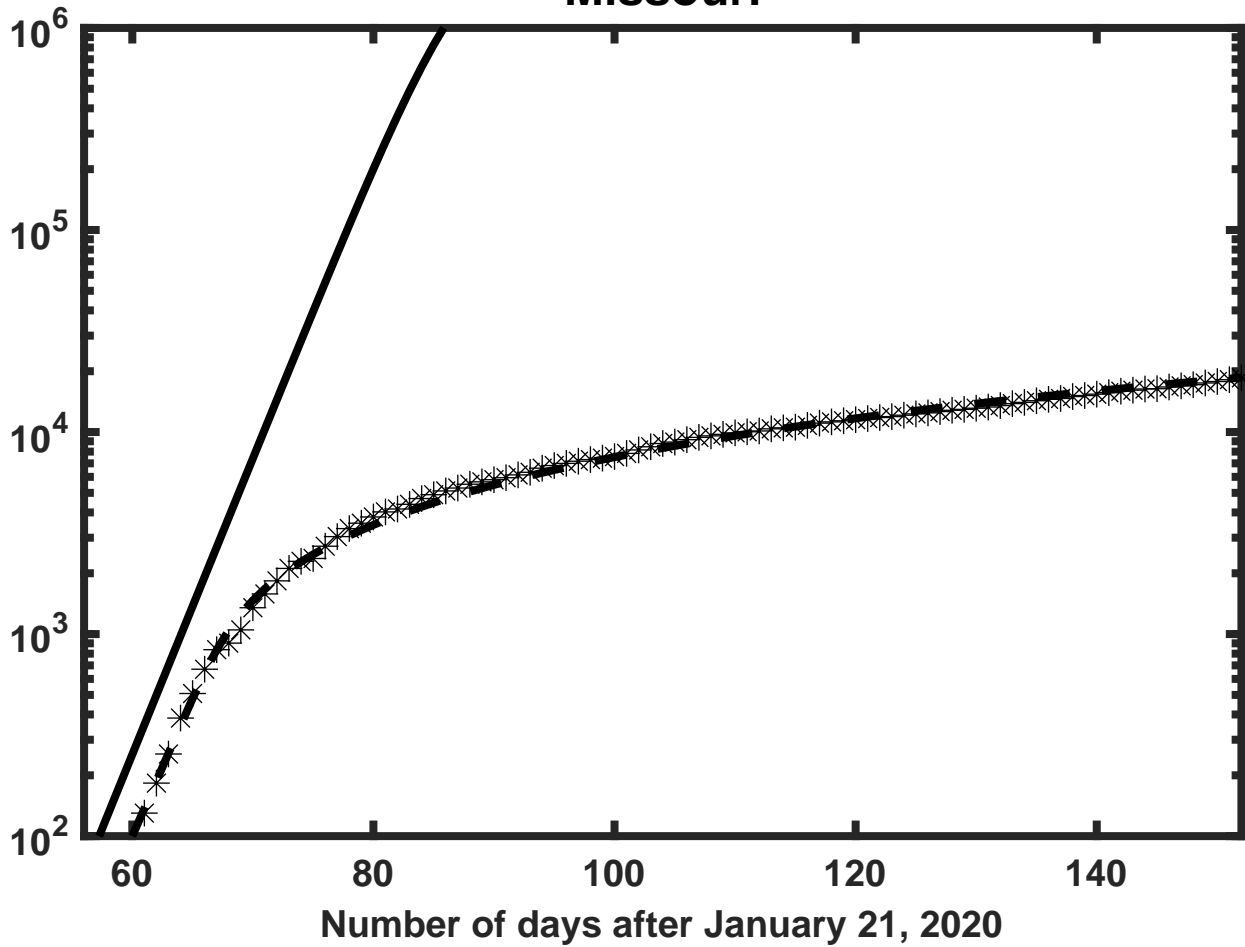

# Montana

Cumulative confirmed case counts

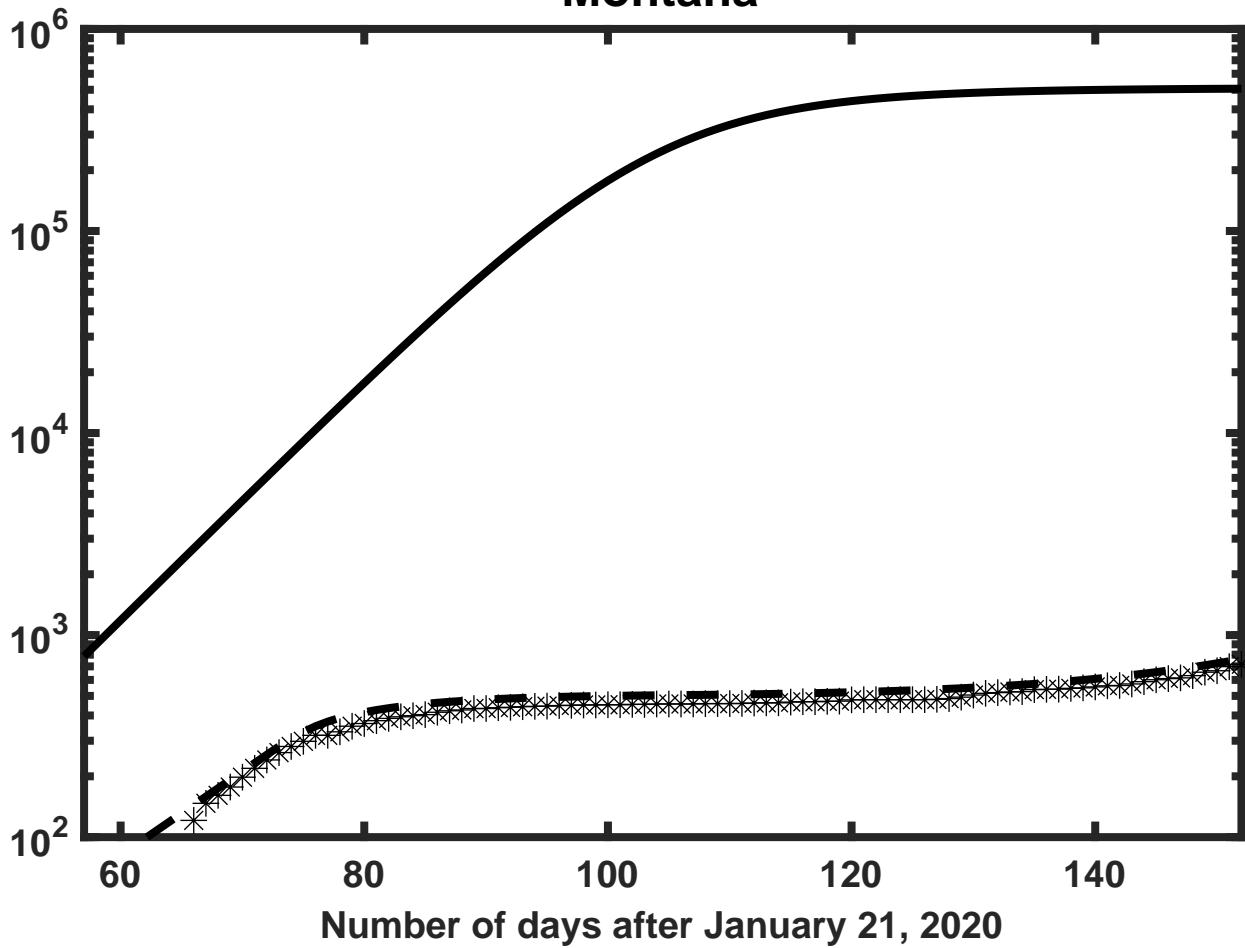



# Nebraska

Cumulative confirmed case counts

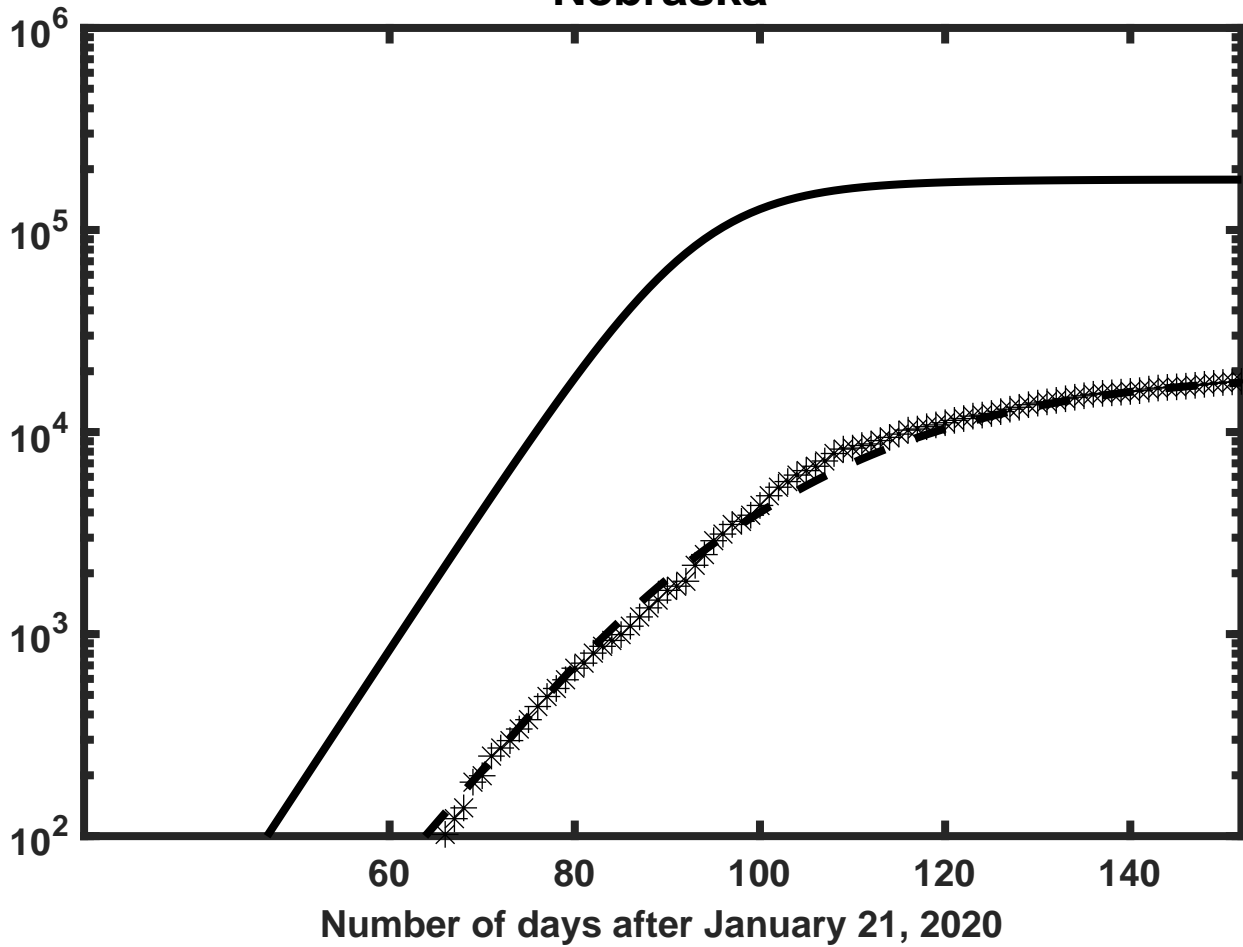

# Nevada

Cumulative confirmed case counts

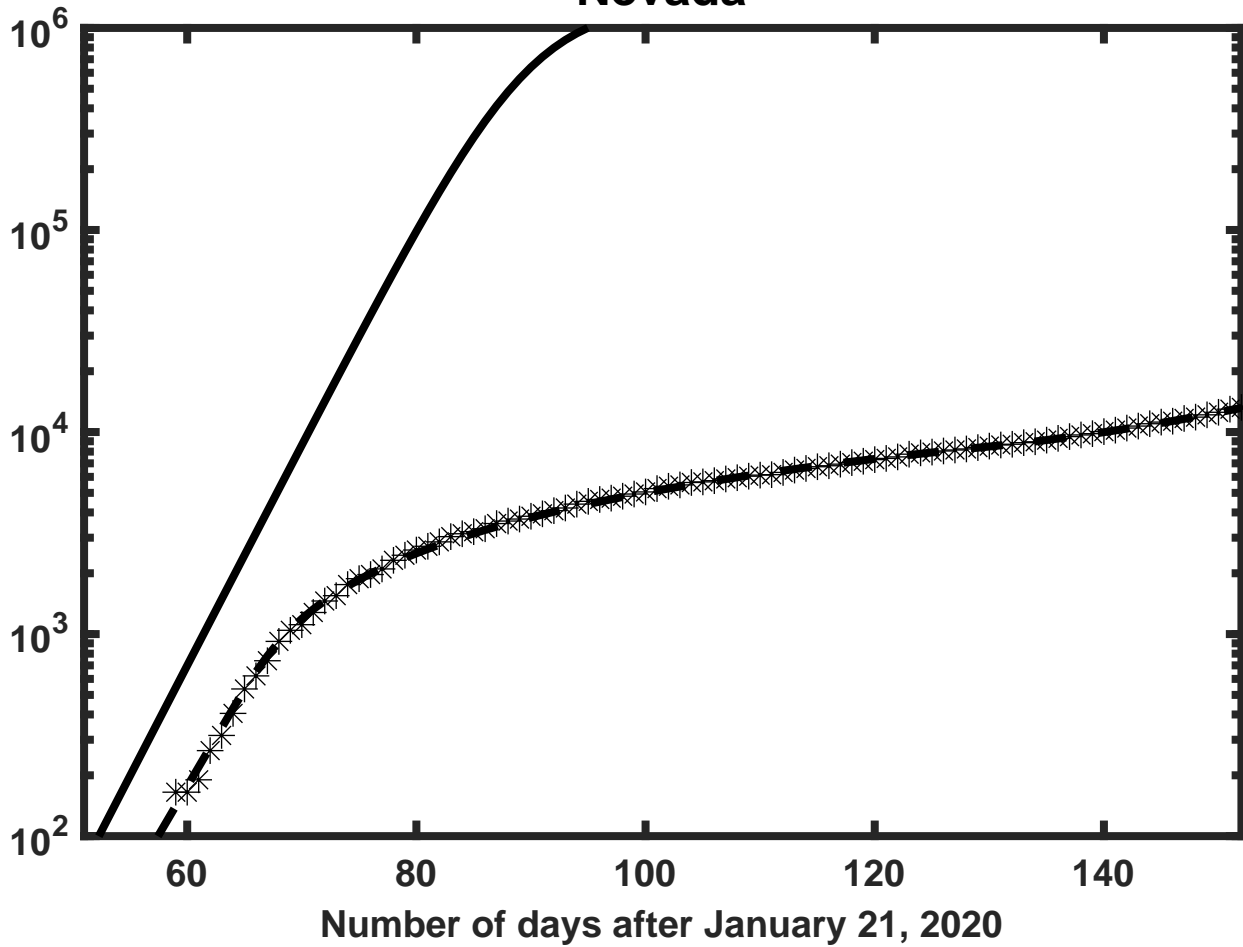

# New Hampshire

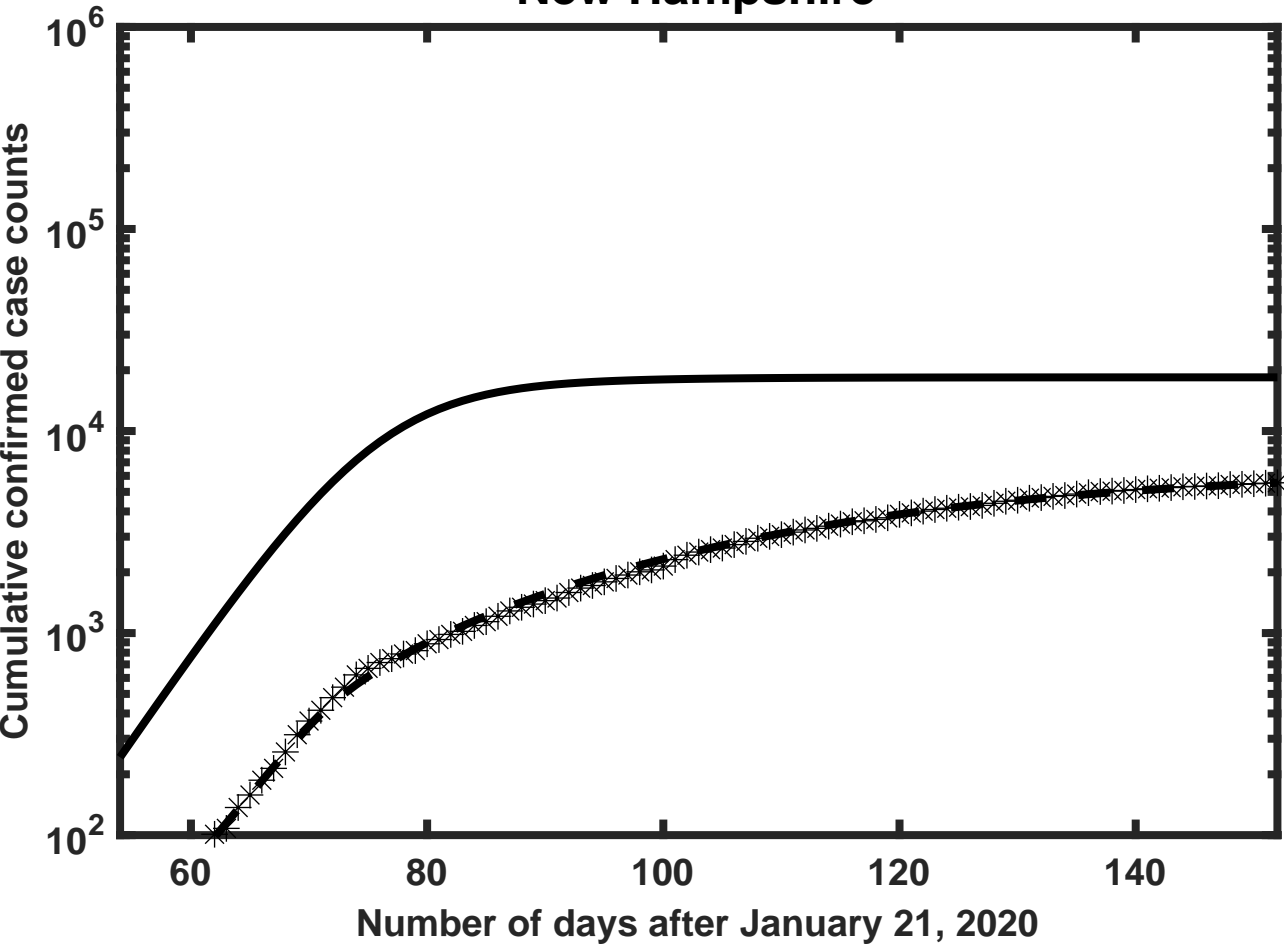

# New Mexico

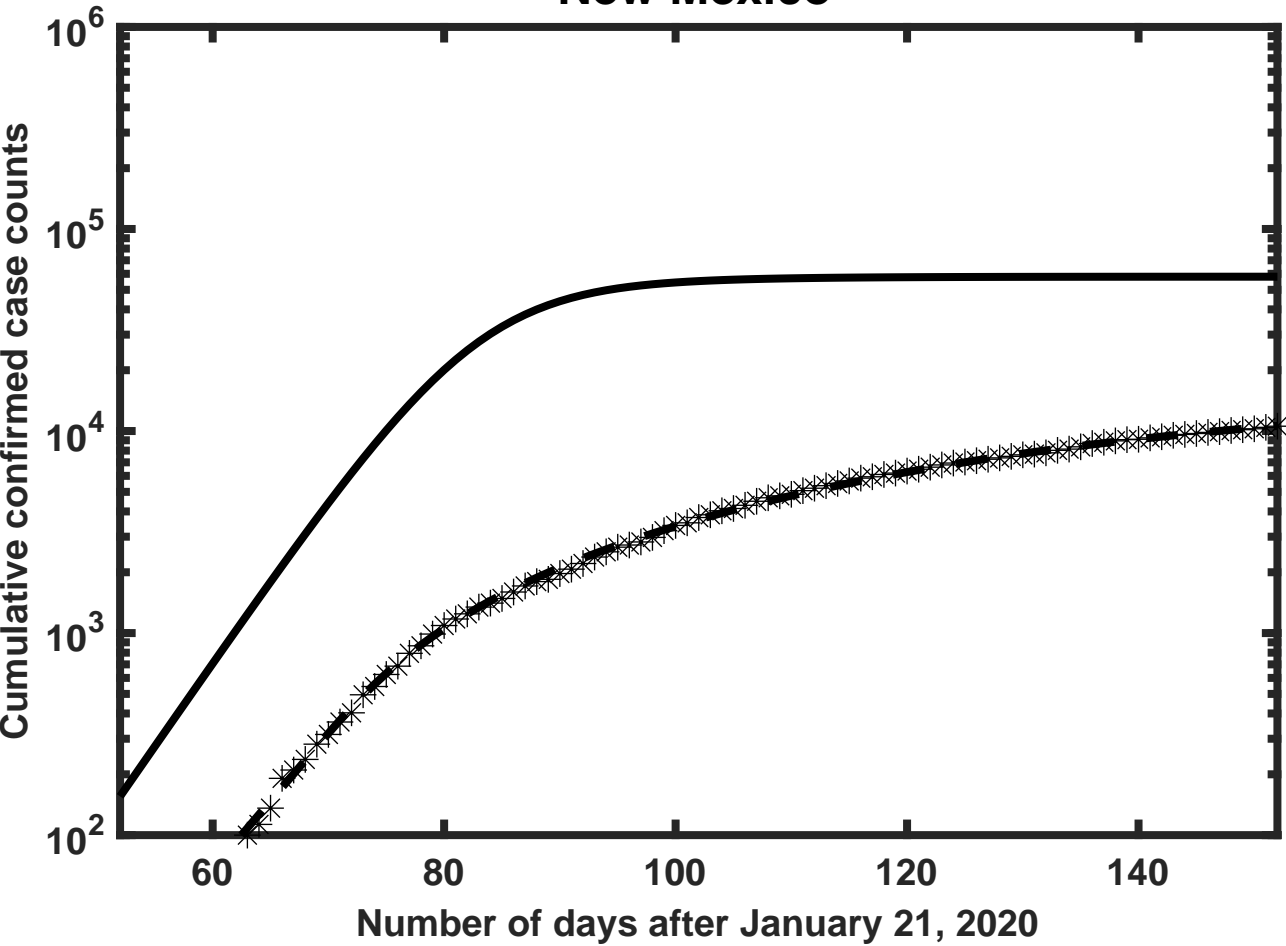

# New York

Cumulative confirmed case counts

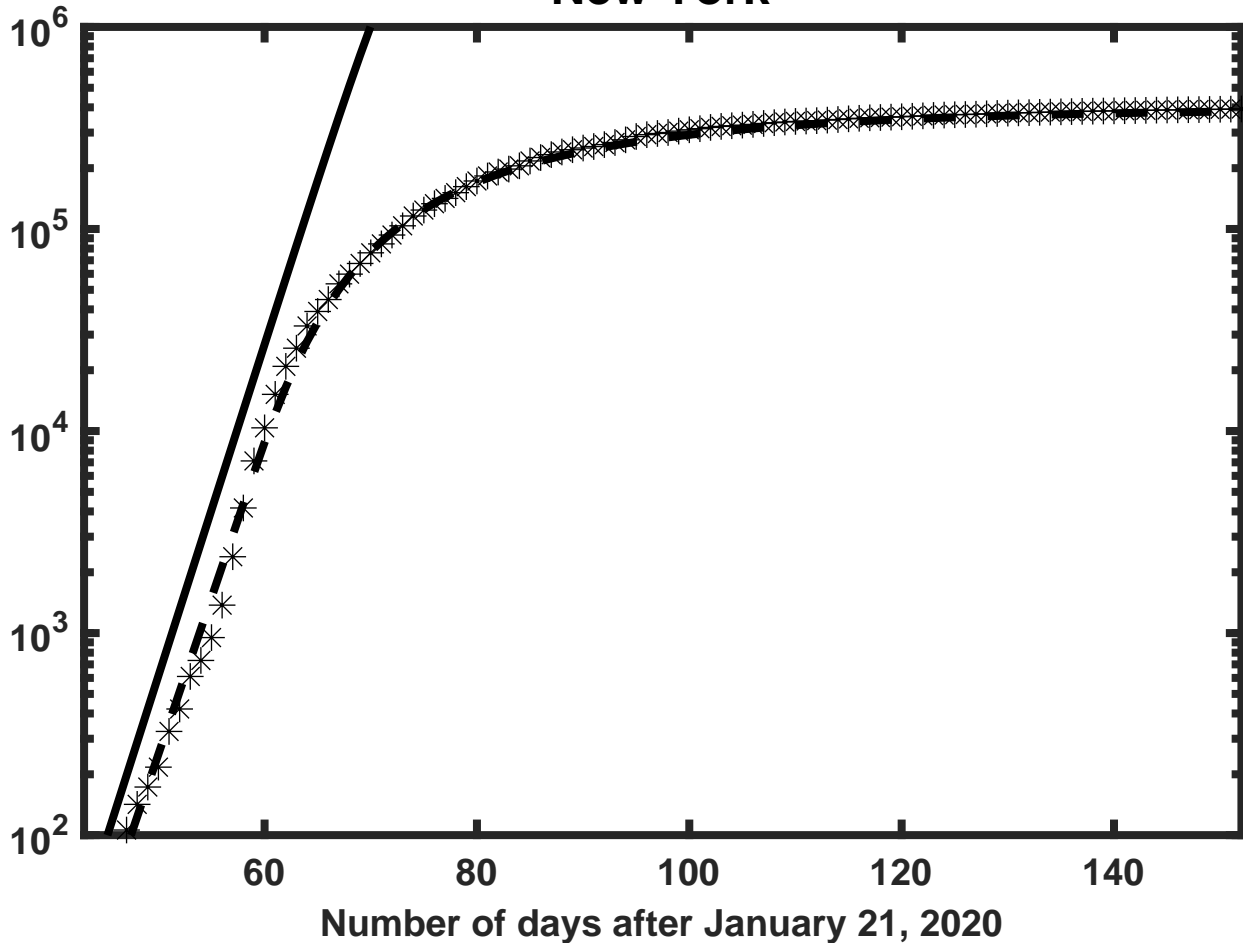

# North Carolina

Cumulative confirmed case counts

Number of days after January 21, 2020

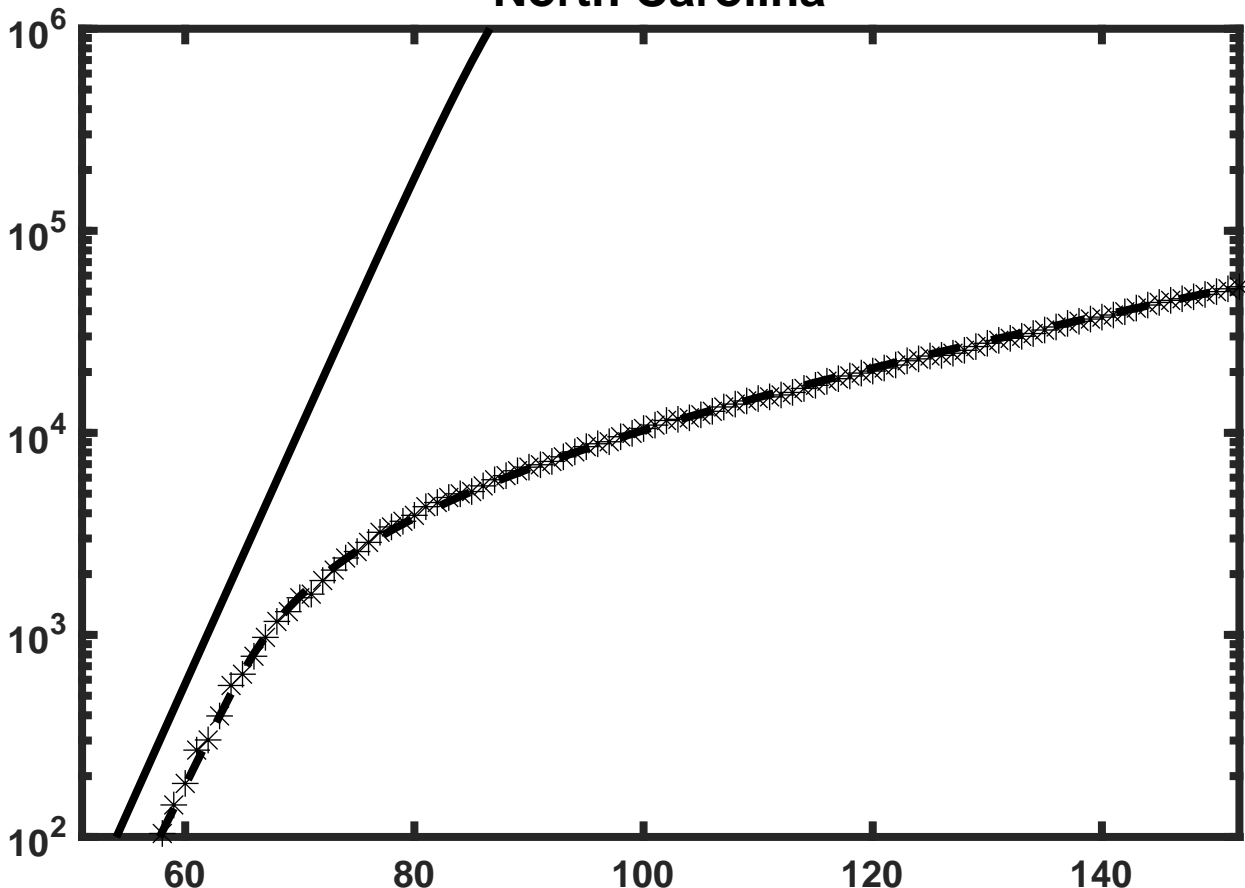

# North Dakota

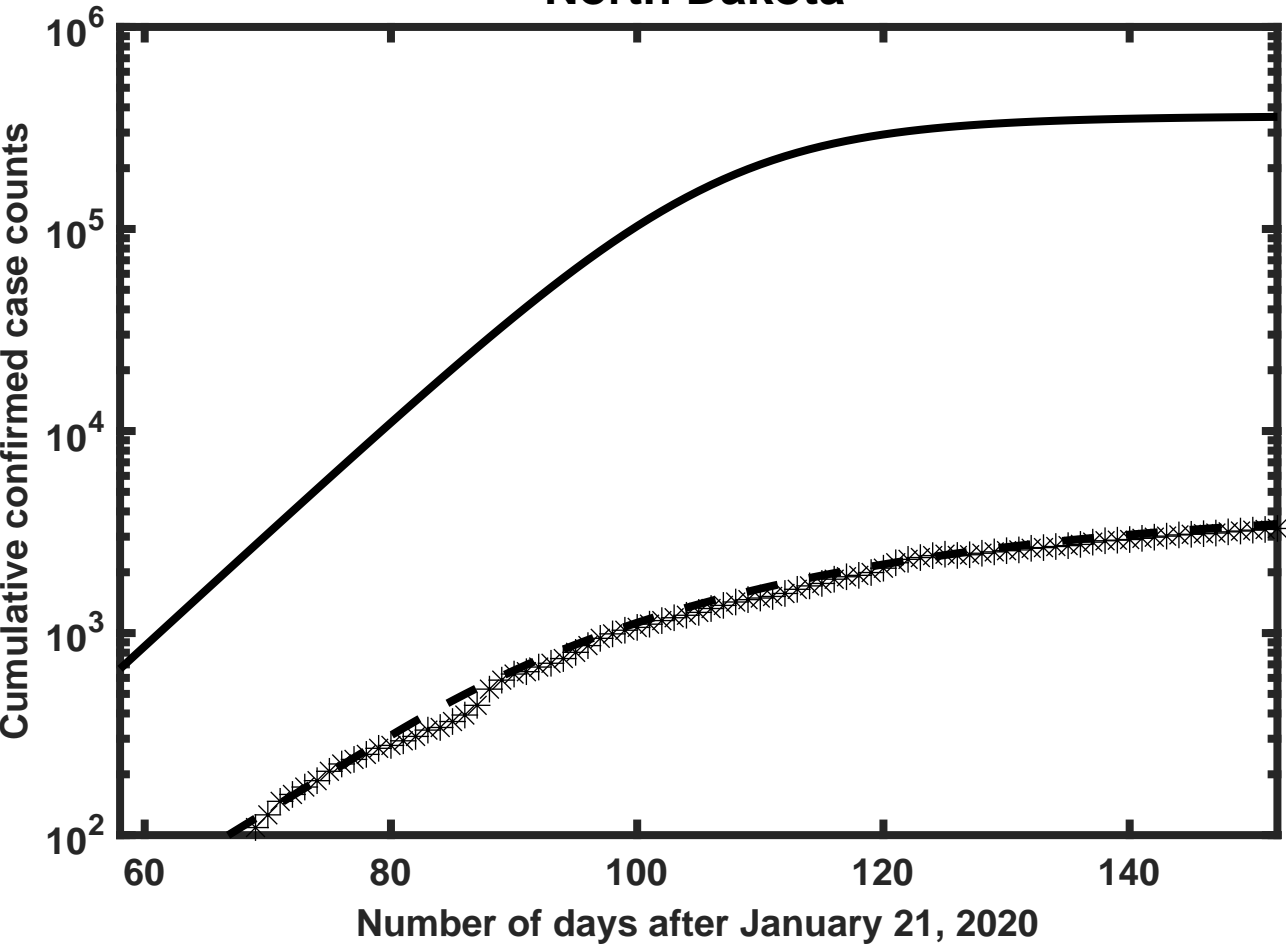

# Ohio

Cumulative confirmed case counts

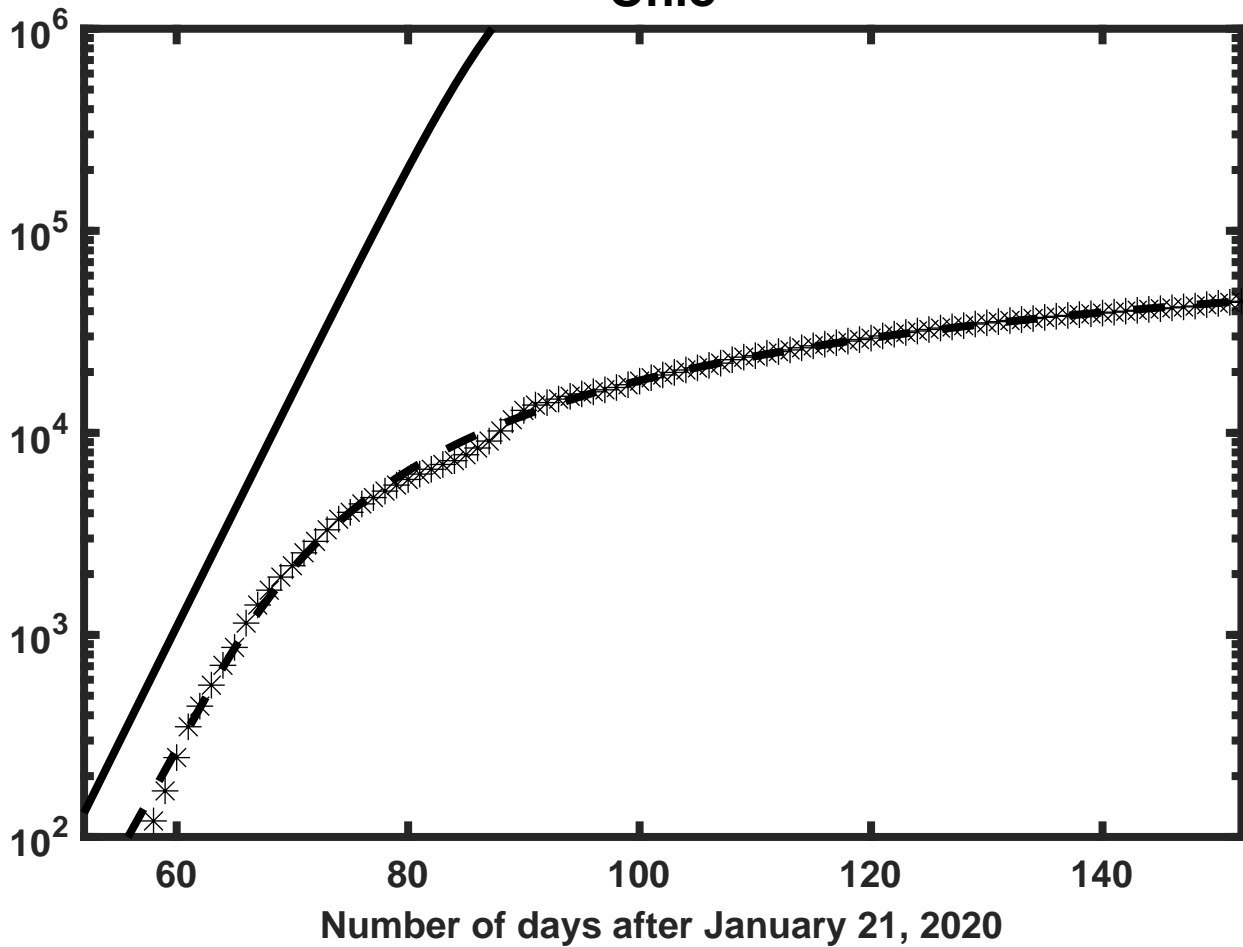



# Oklahoma

Cumulative confirmed case counts

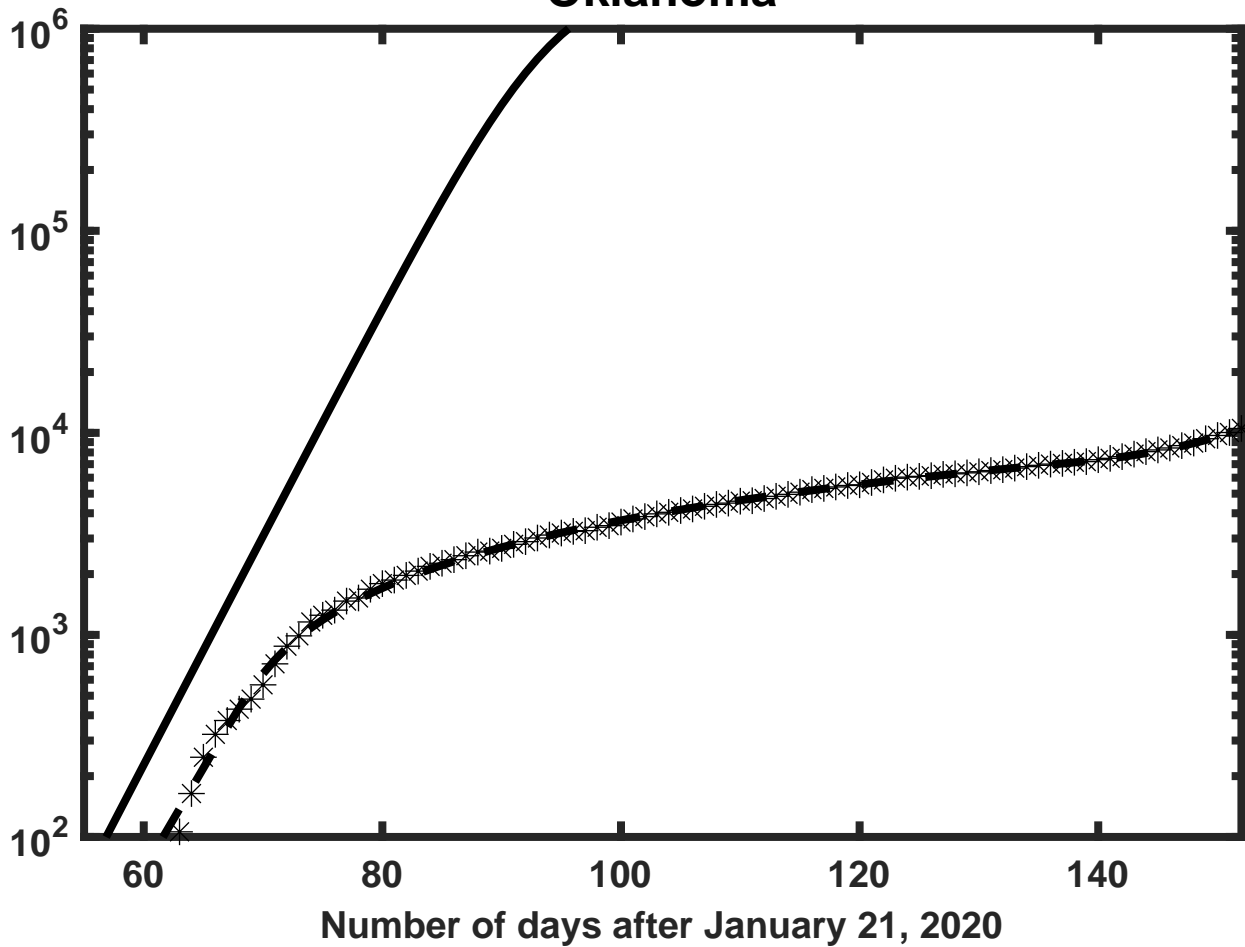

# Oregon

Cumulative confirmed case counts

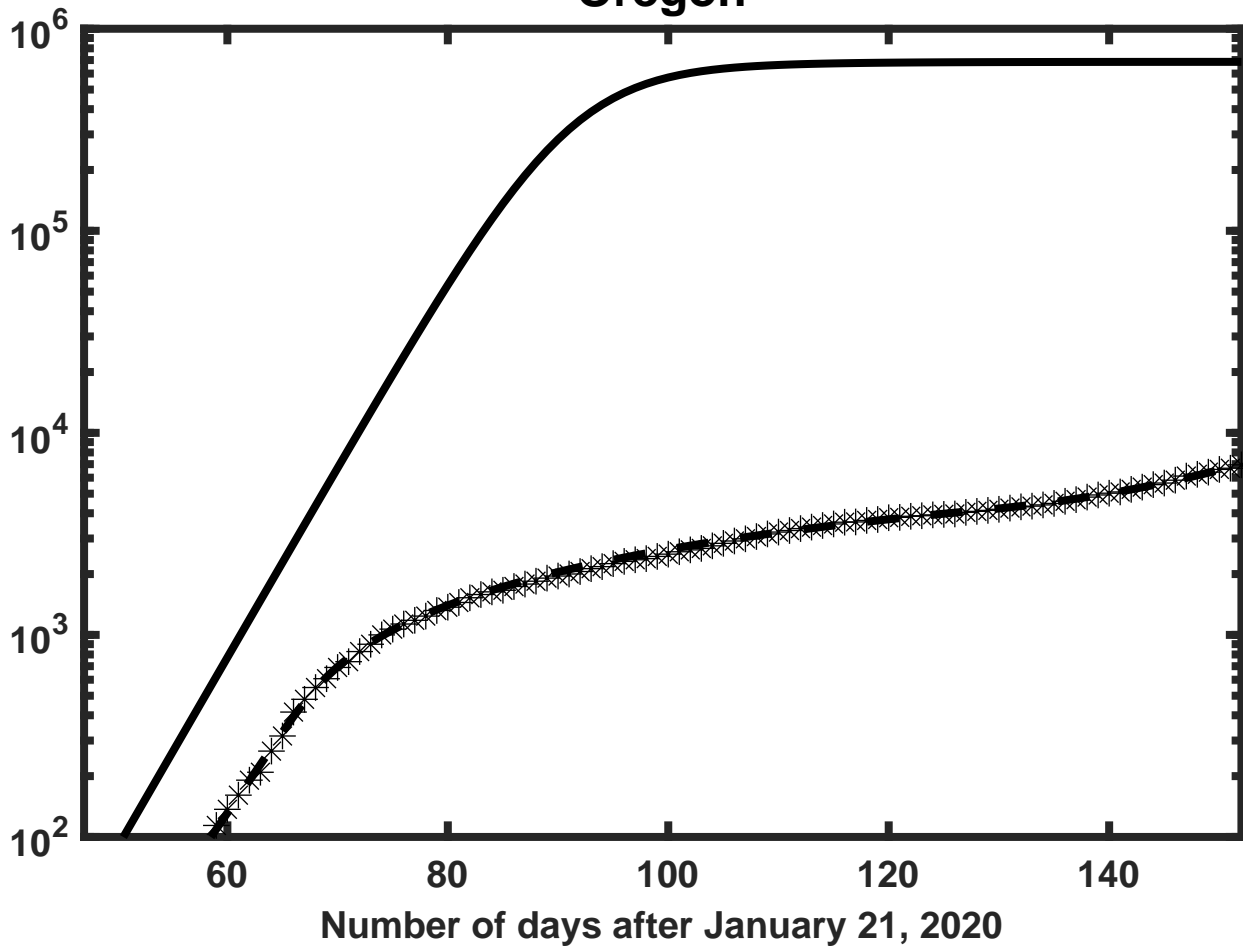

# Pennsylvania

Cumulative confirmed case counts

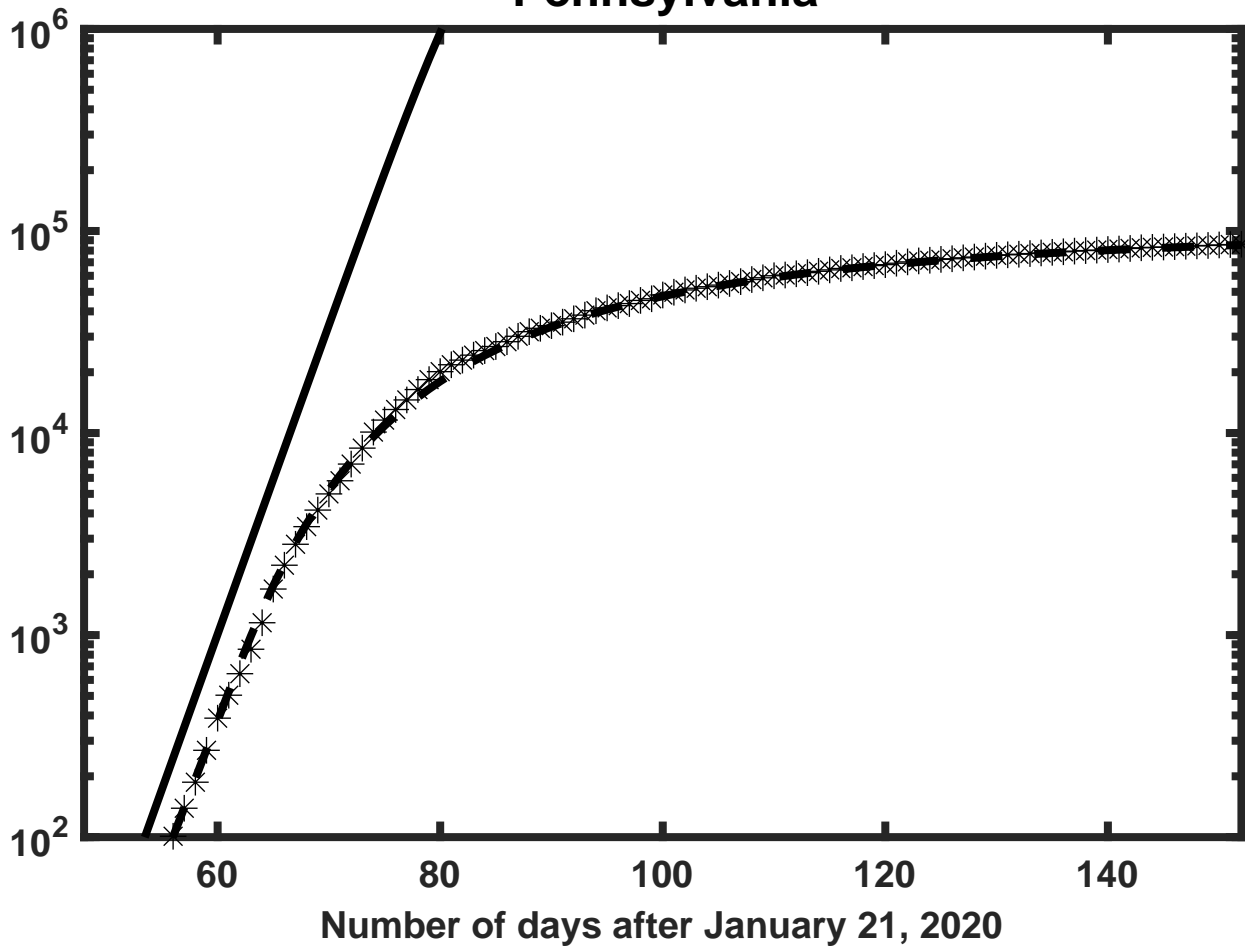

# Rhode Island

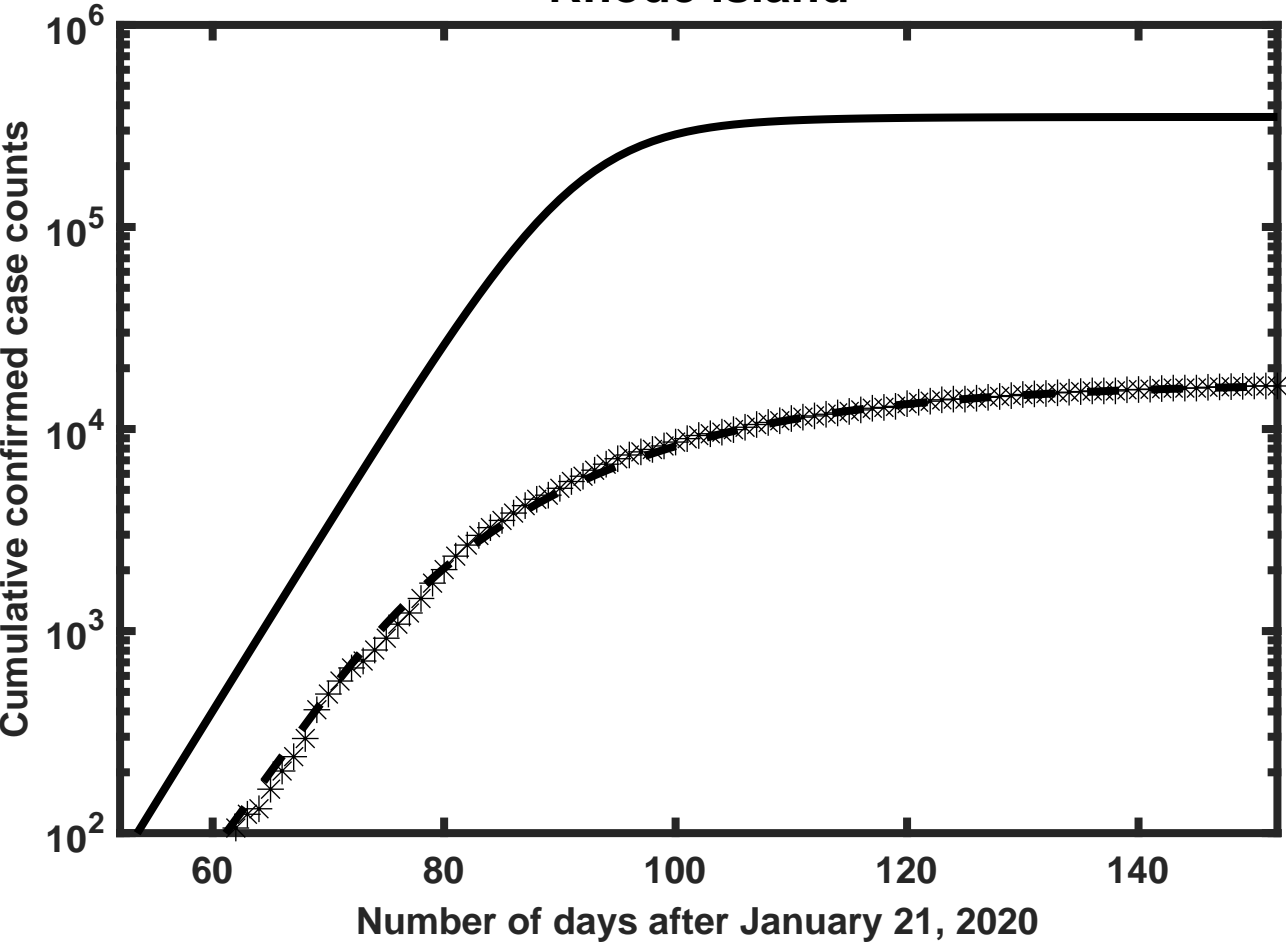

# South Carolina

Cumulative confirmed case counts

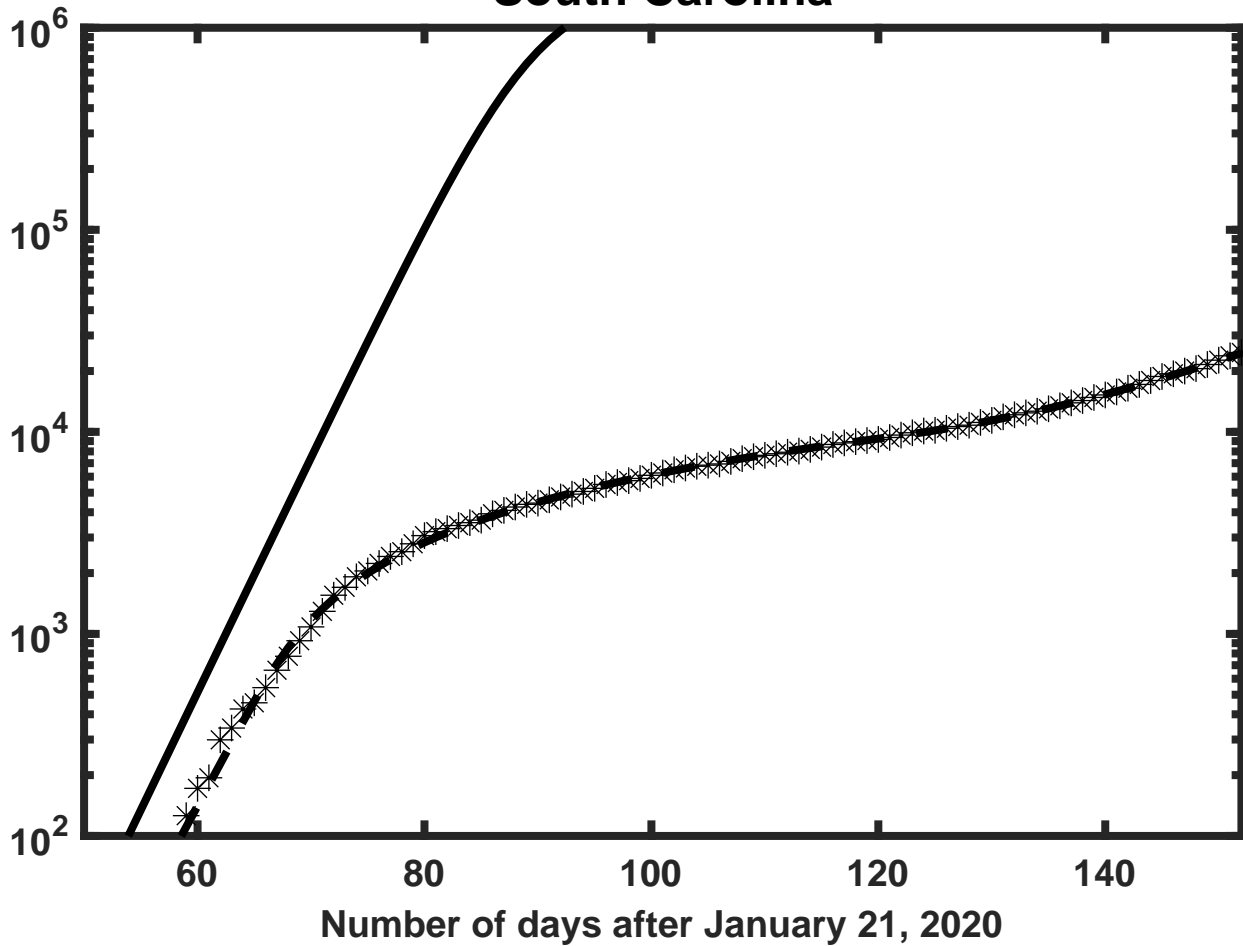

# South Dakota

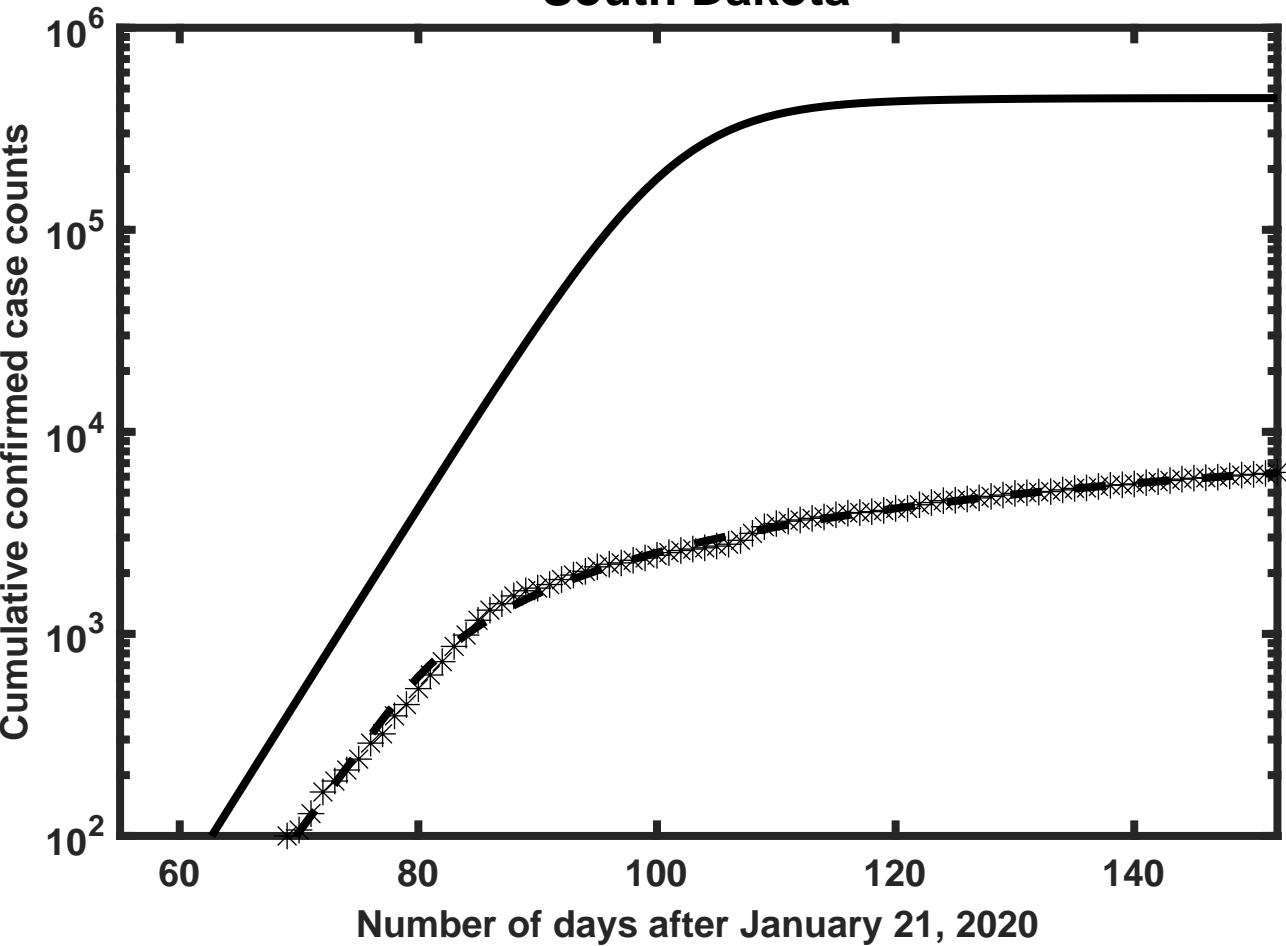

# Tennessee

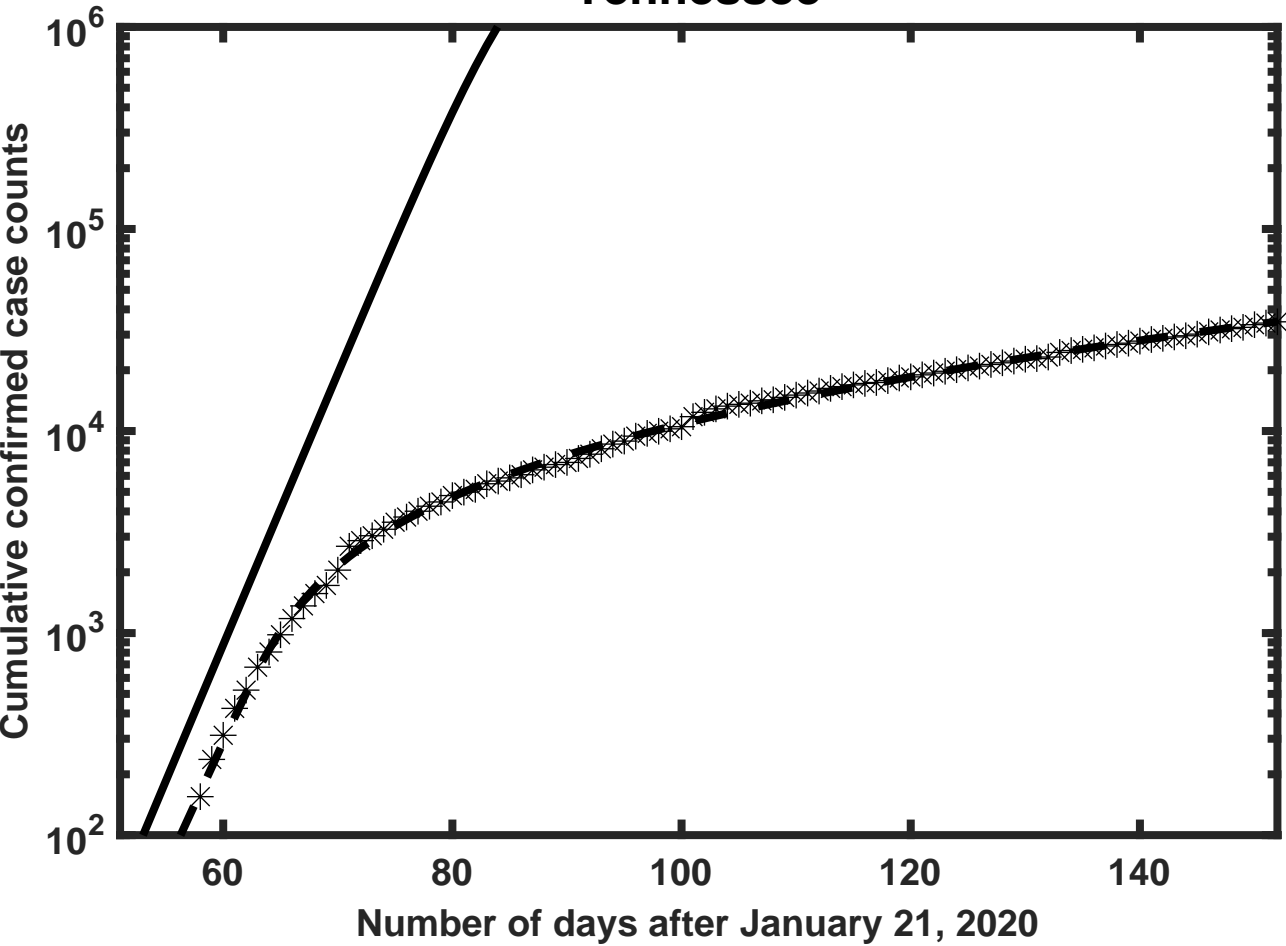

# Texas

Cumulative confirmed case counts

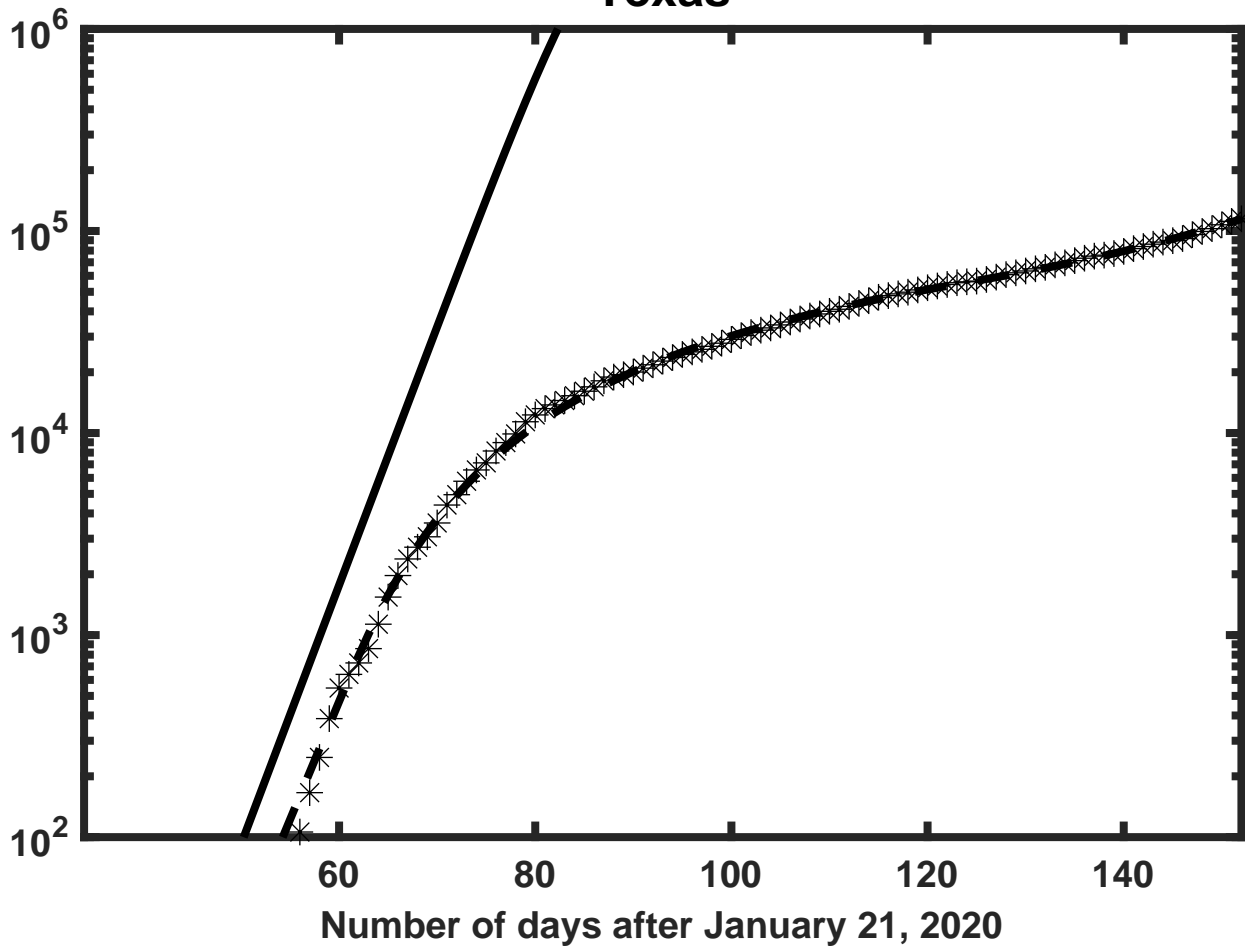



# Utah

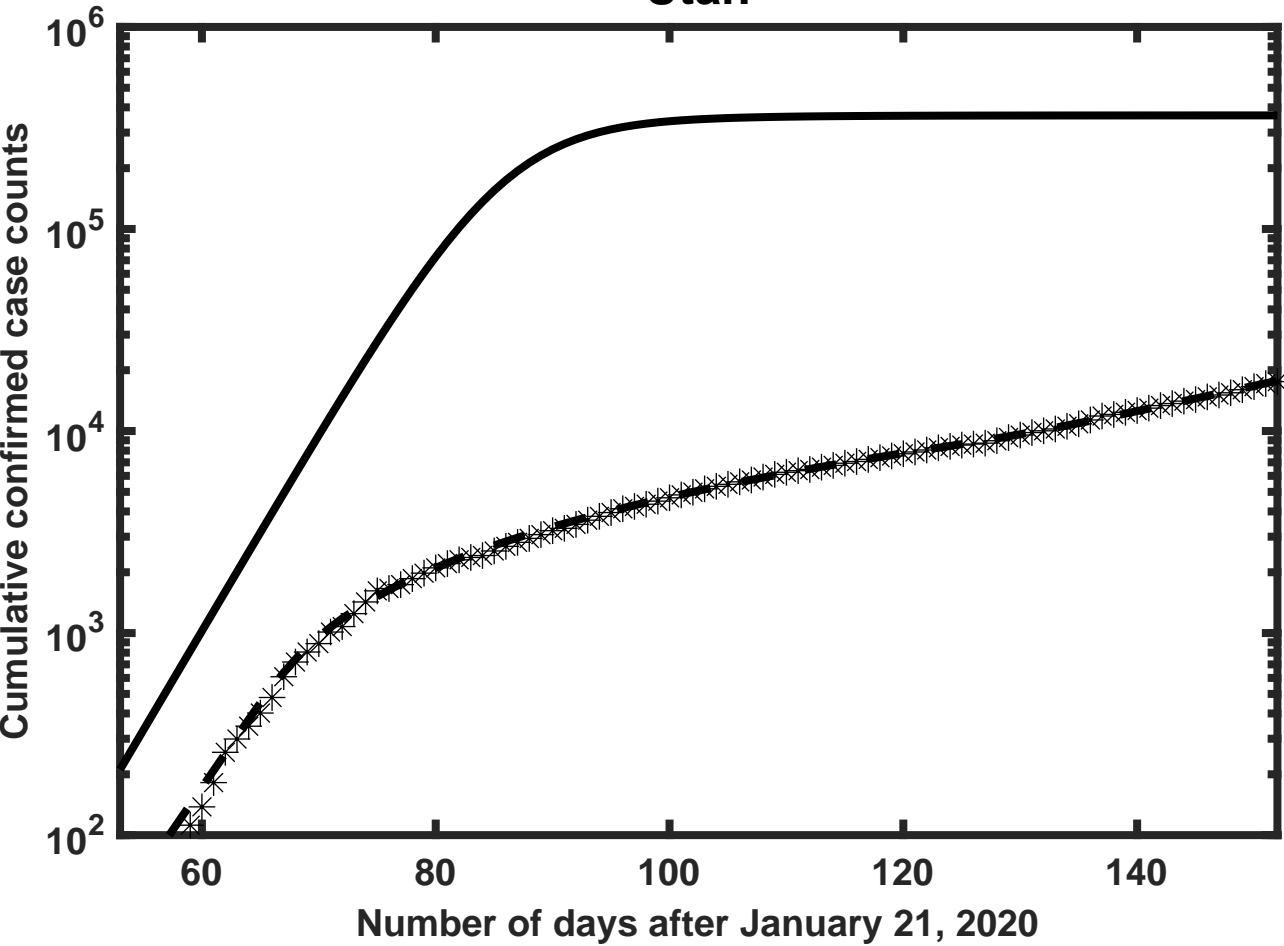

# Vermont

Cumulative confirmed case counts

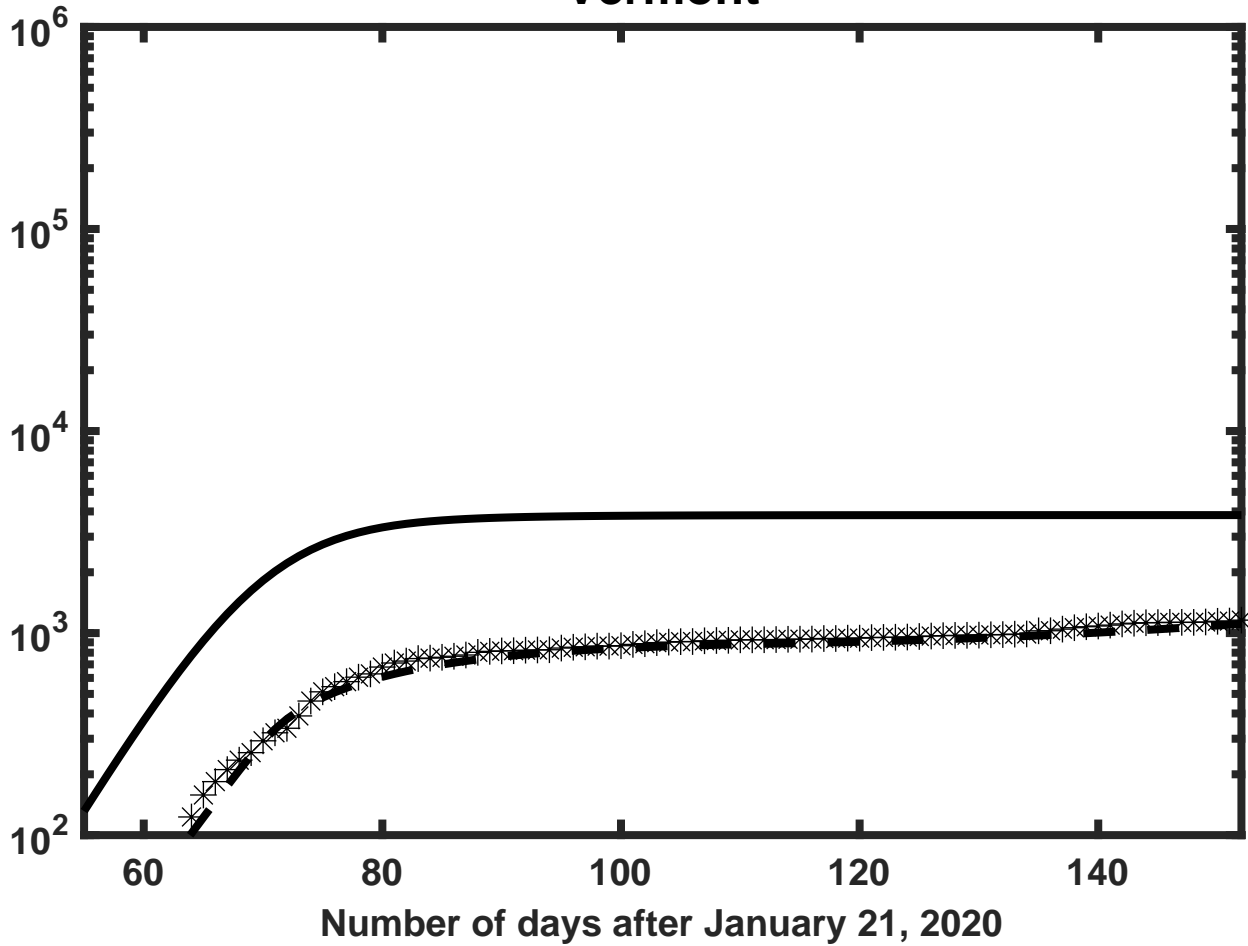

# Virginia

Cumulative confirmed case counts

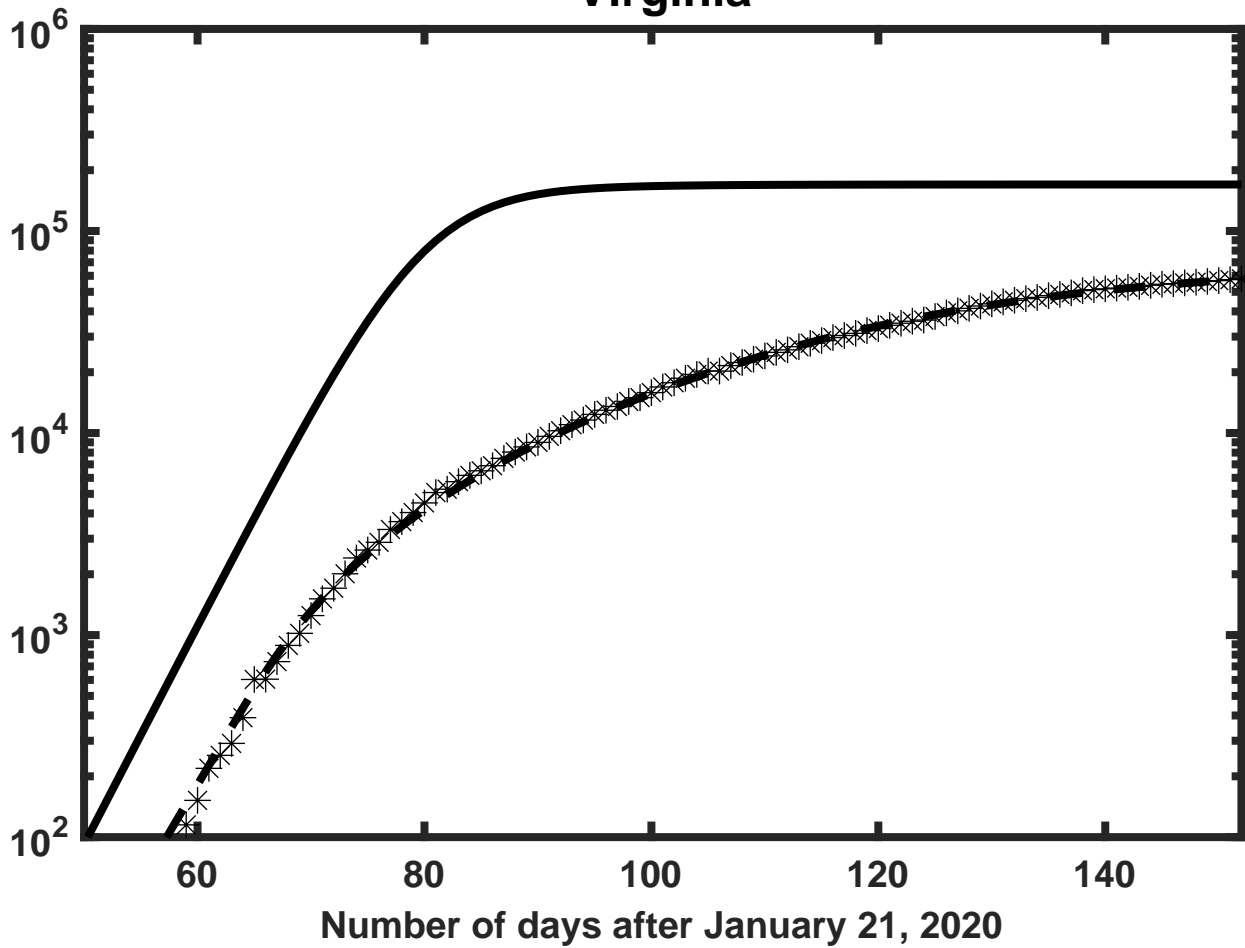

# Washington

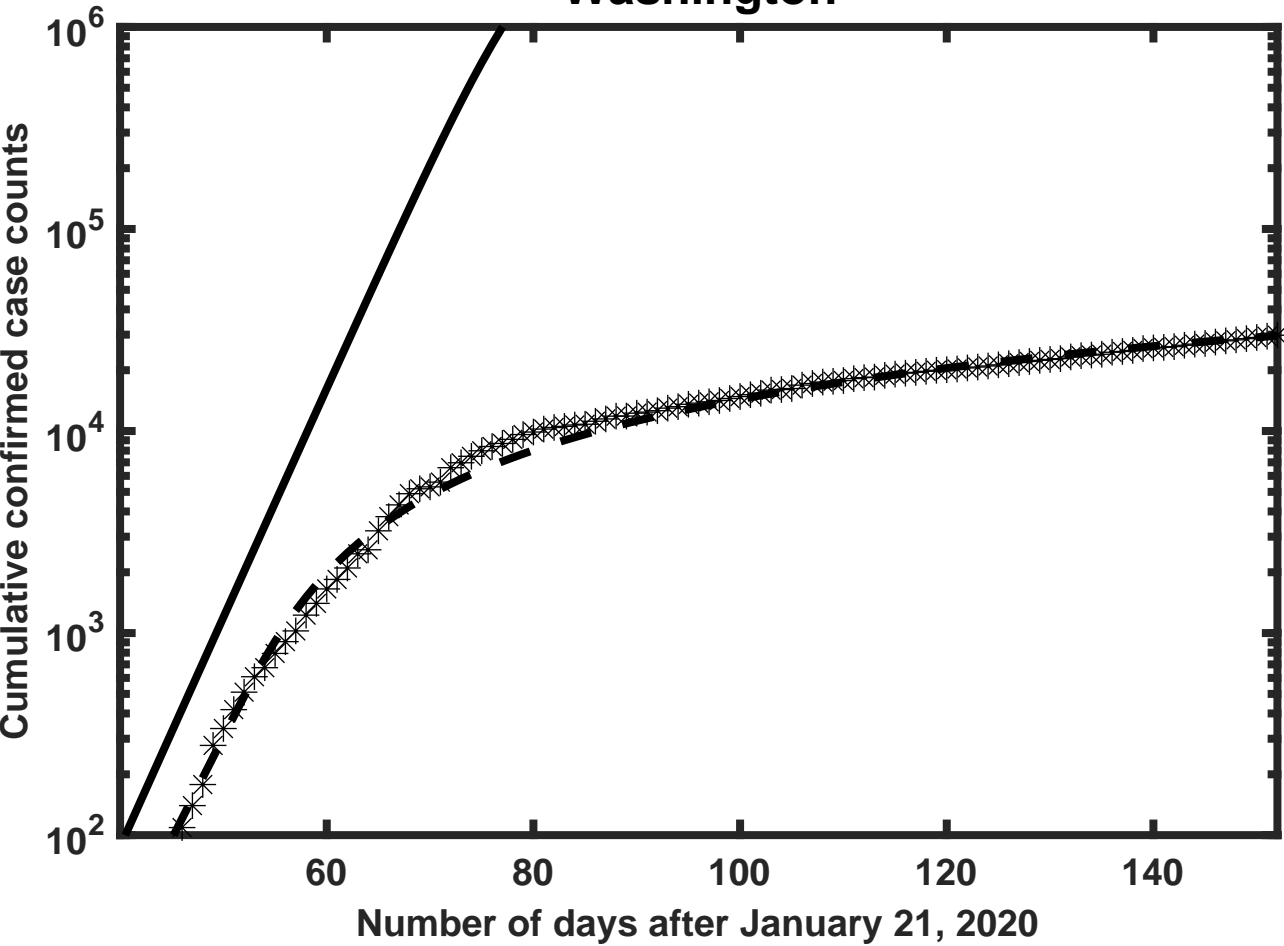

# West Virginia

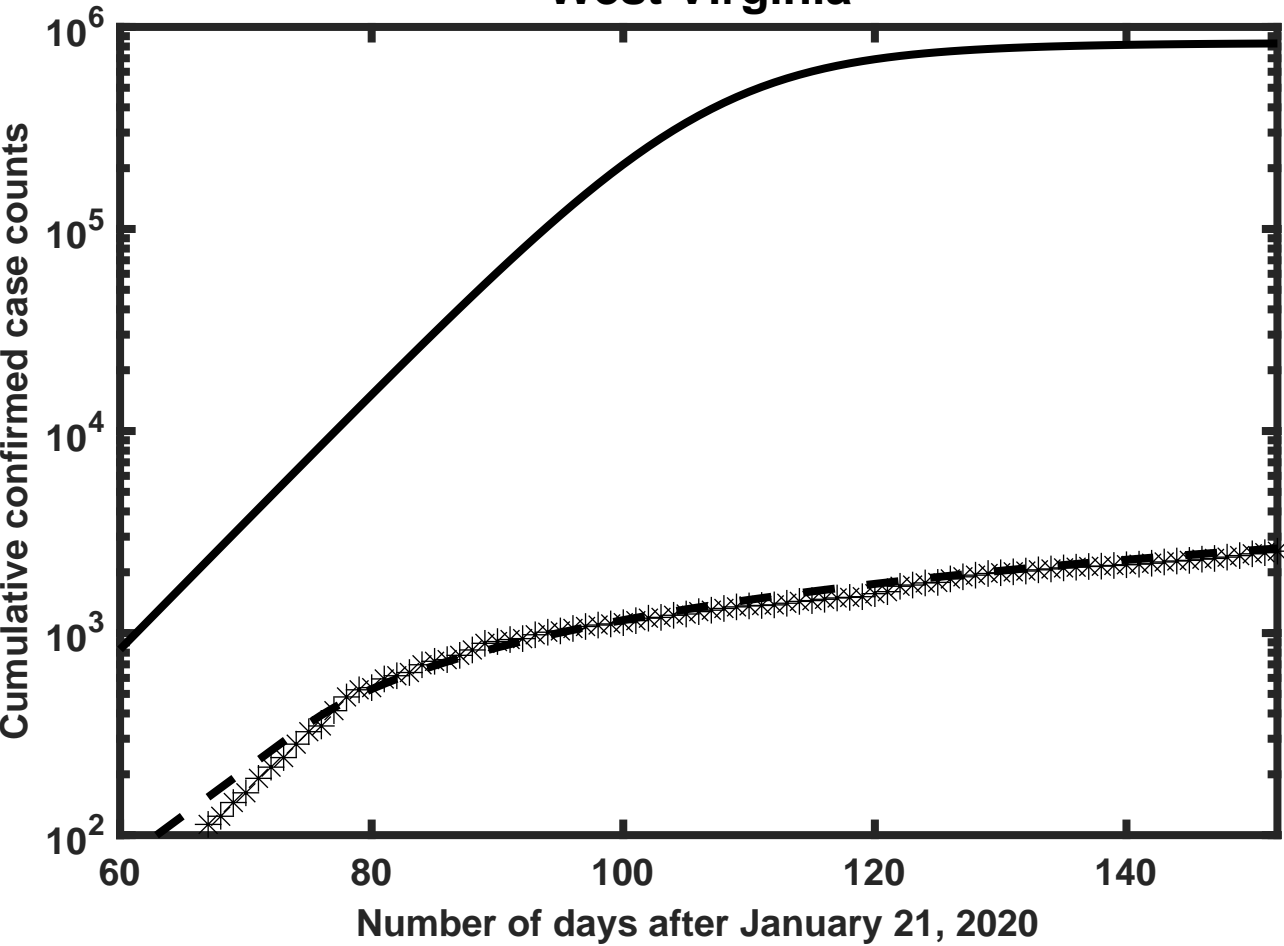

# Wisconsin

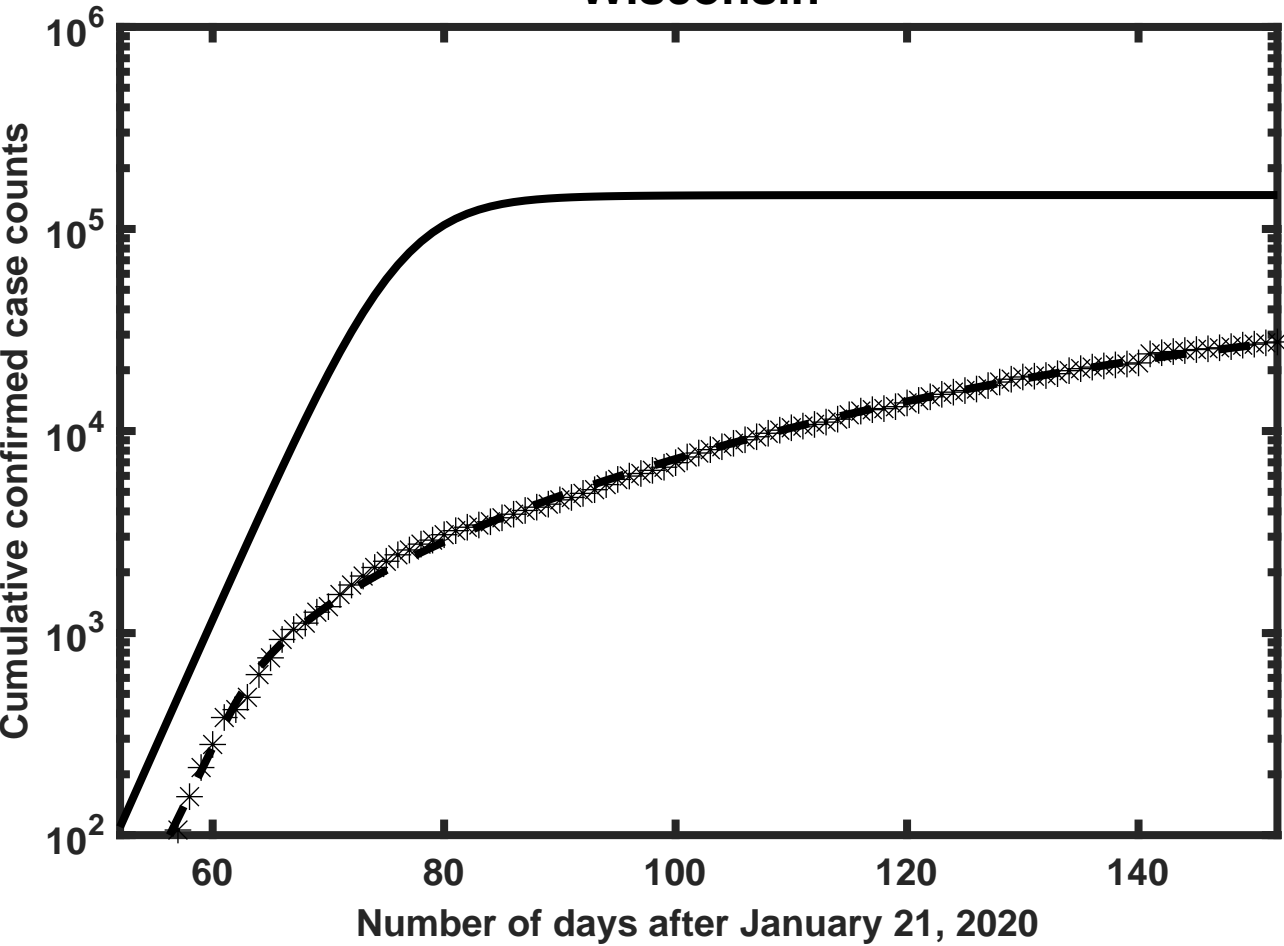

Supplement: s1 [file s1]
